# Supplementary material (part 1 of 5)
Source: MDPI journal article supplement (https://www.mdpi.com/2072-4292/12/17/2835)

**lakename: Babine lakeid: 517 lat: 54.82 lon: -126.2**

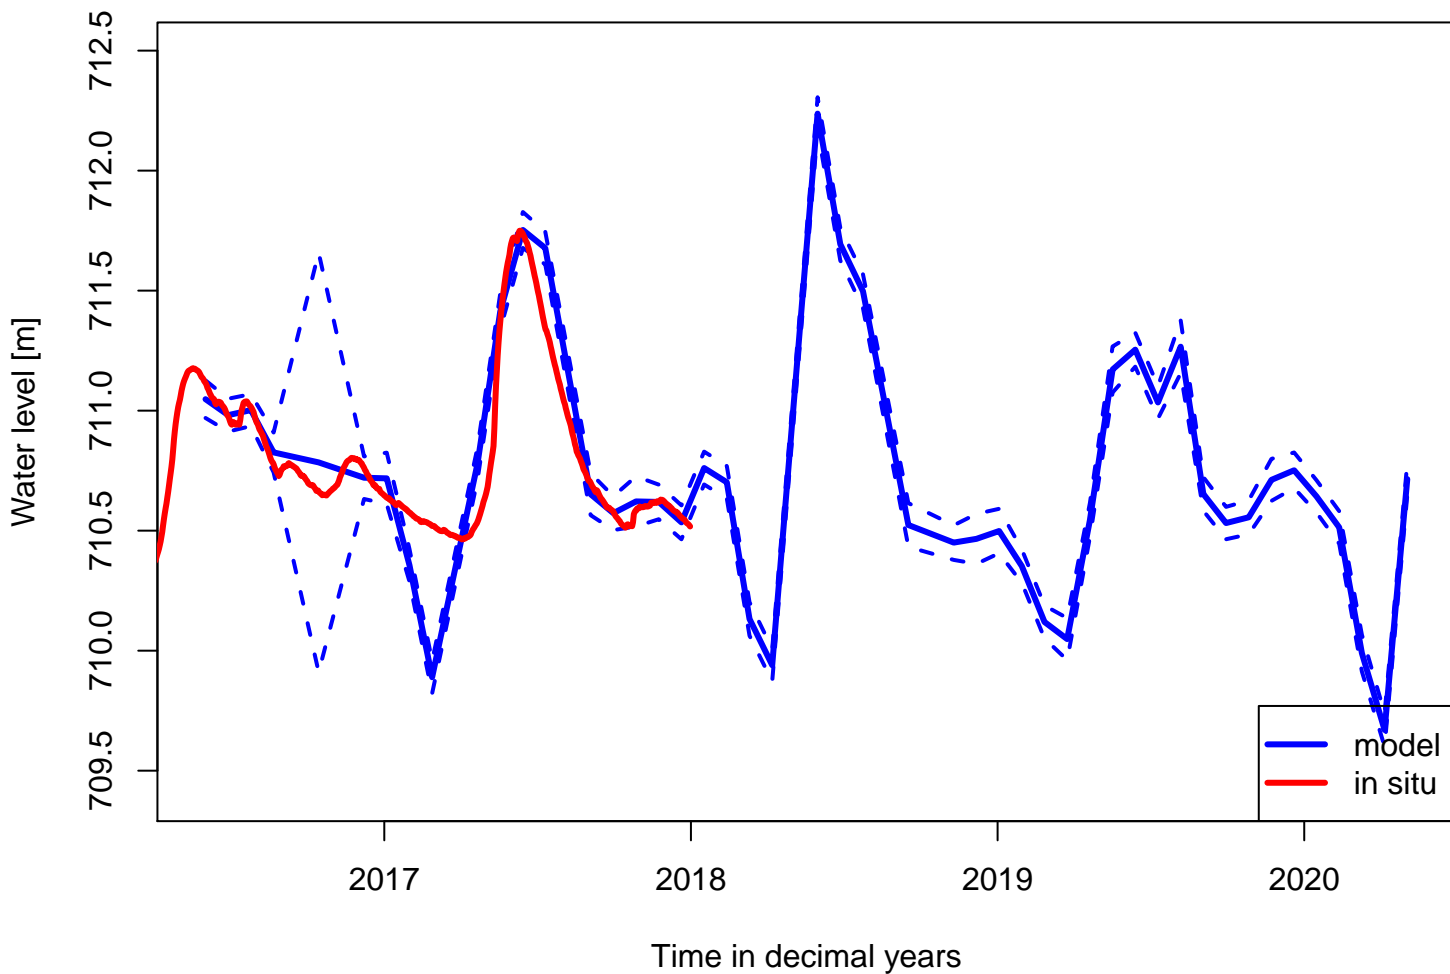

Supplement: s1 [file s1]

**lakename: Ennadai lakeid: 370 lat: 61.11 lon: -101**

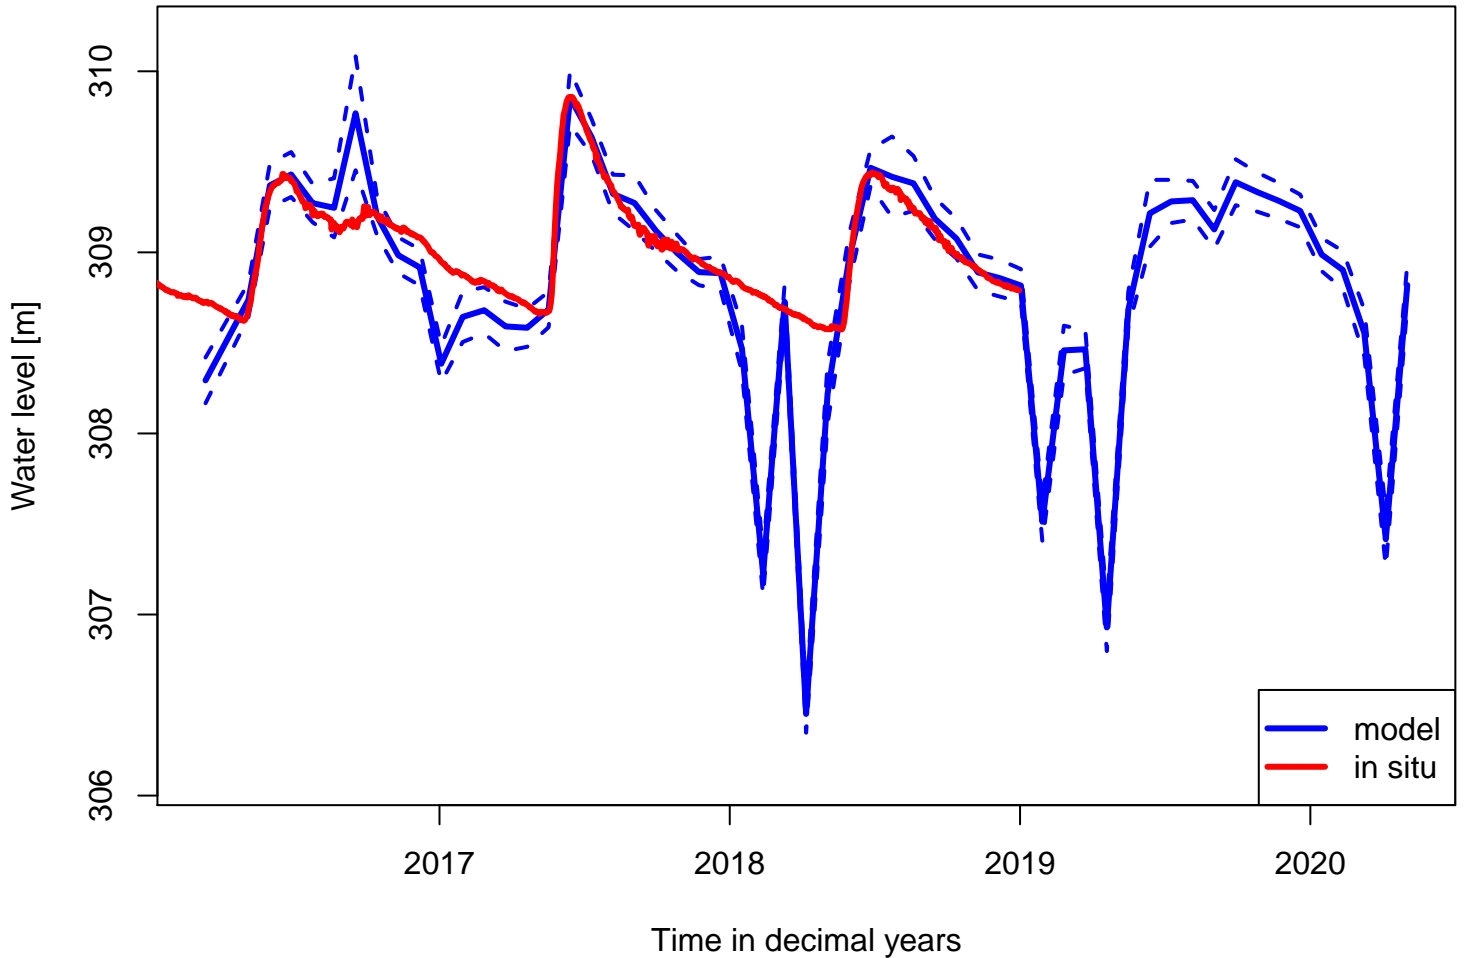

Supplement: s1 [file s1]

**lakename: Biche lakeid: 531 lat: 54.77 lon: -112**

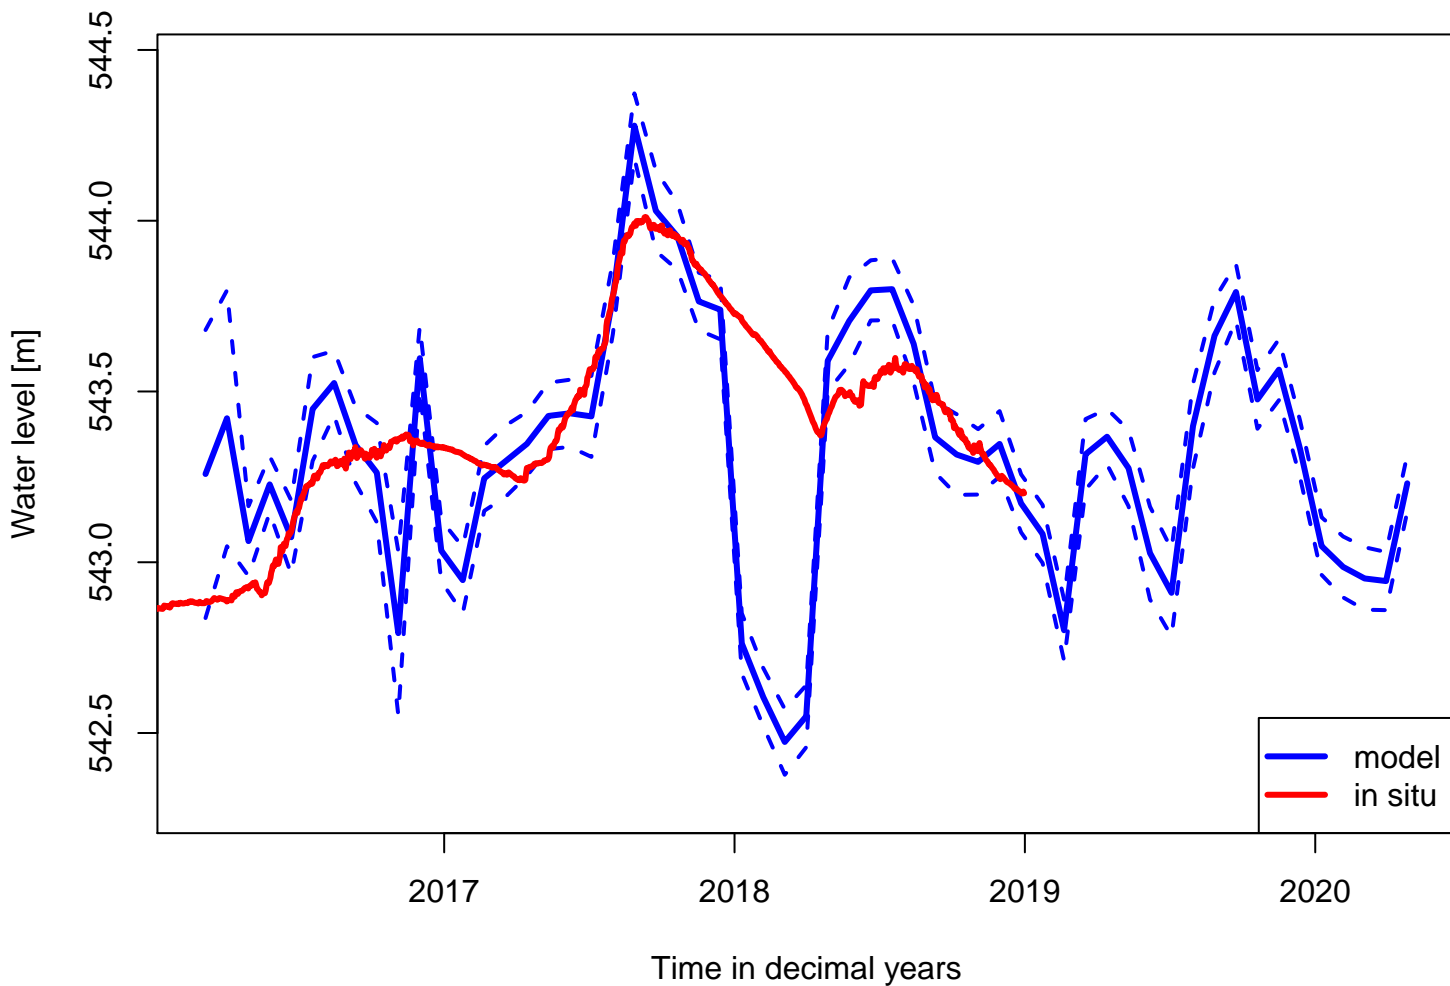

Supplement: s1 [file s1]

**lakename: Lesser Slave lakeid: 42 lat: 55.31 lon: -114.8**

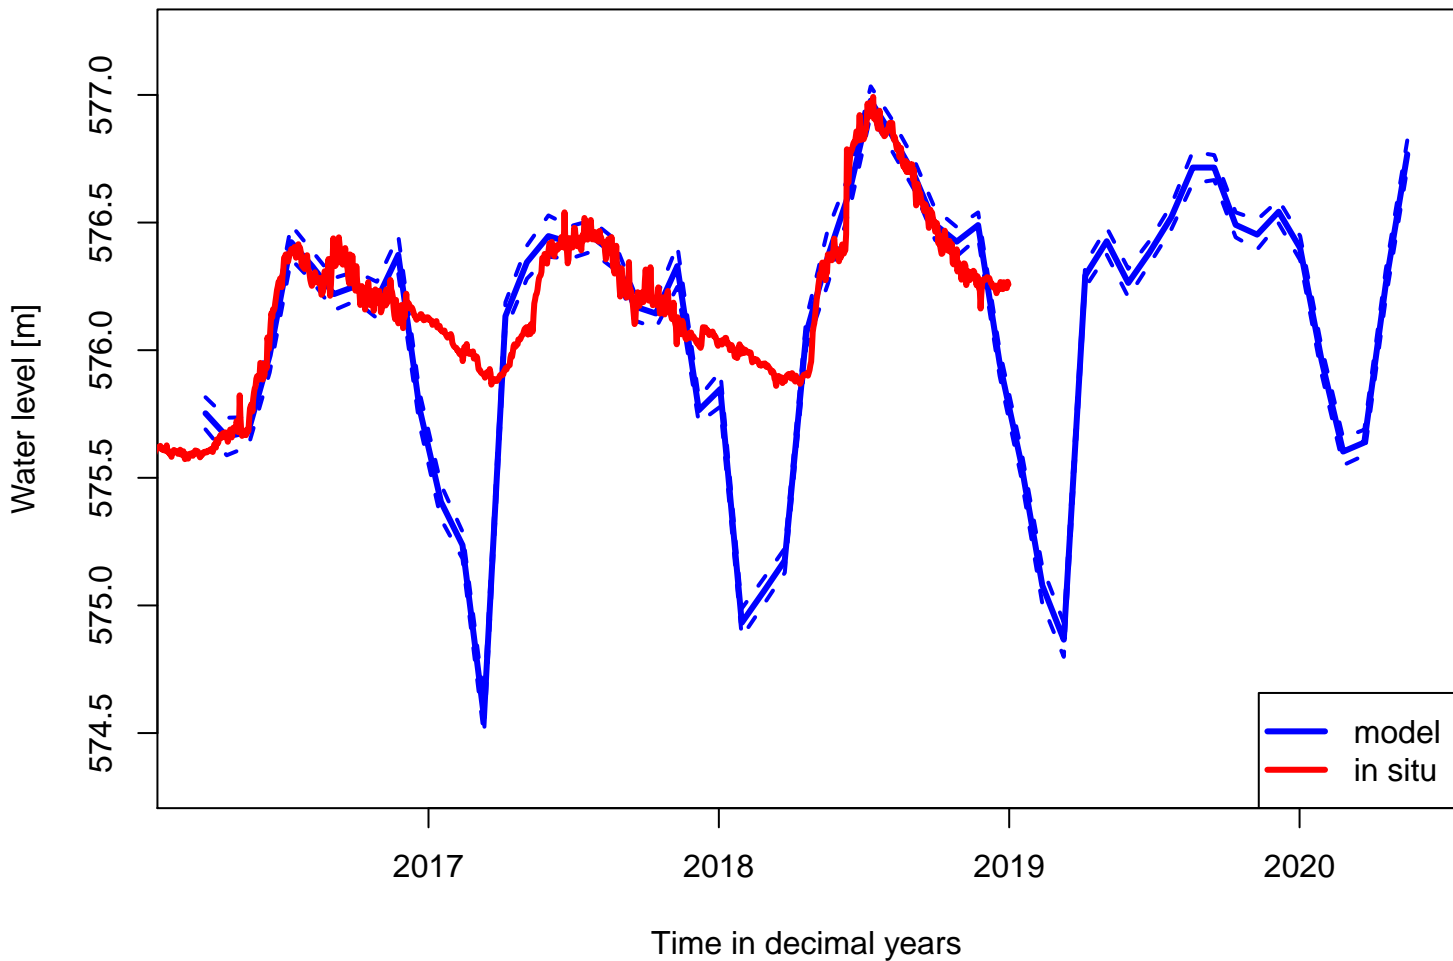

Supplement: s1 [file s1]

**lakename: lakeid: 6993 lat: 53.12 lon: -108.4**

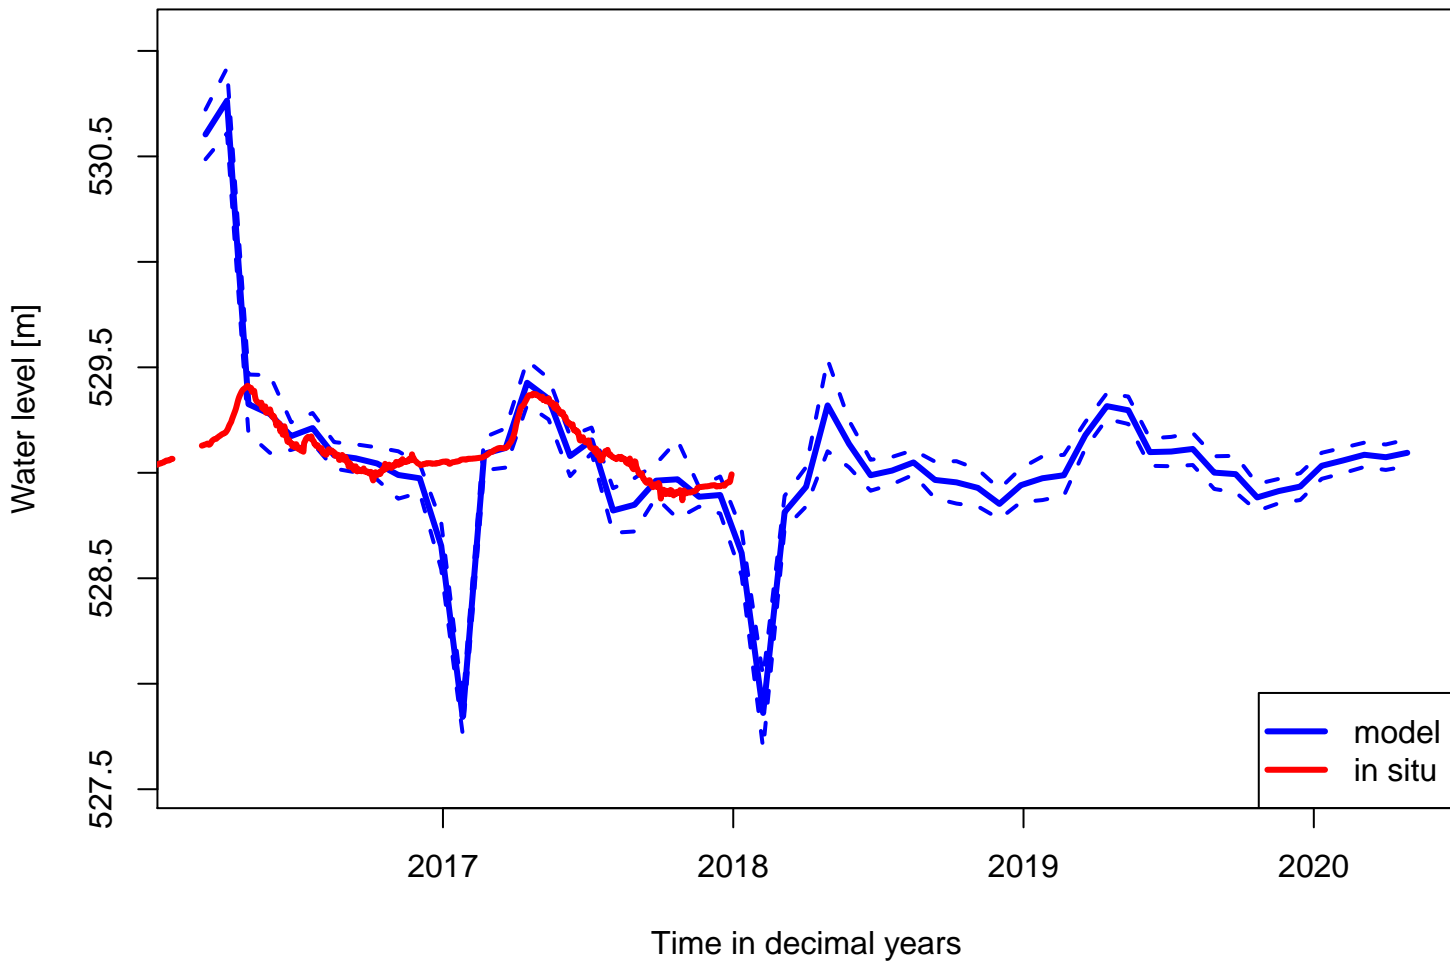

Supplement: s1 [file s1]

**lakename: Nechako Reservoir lakeid: 591 lat: 53.65 lon: -127.5**

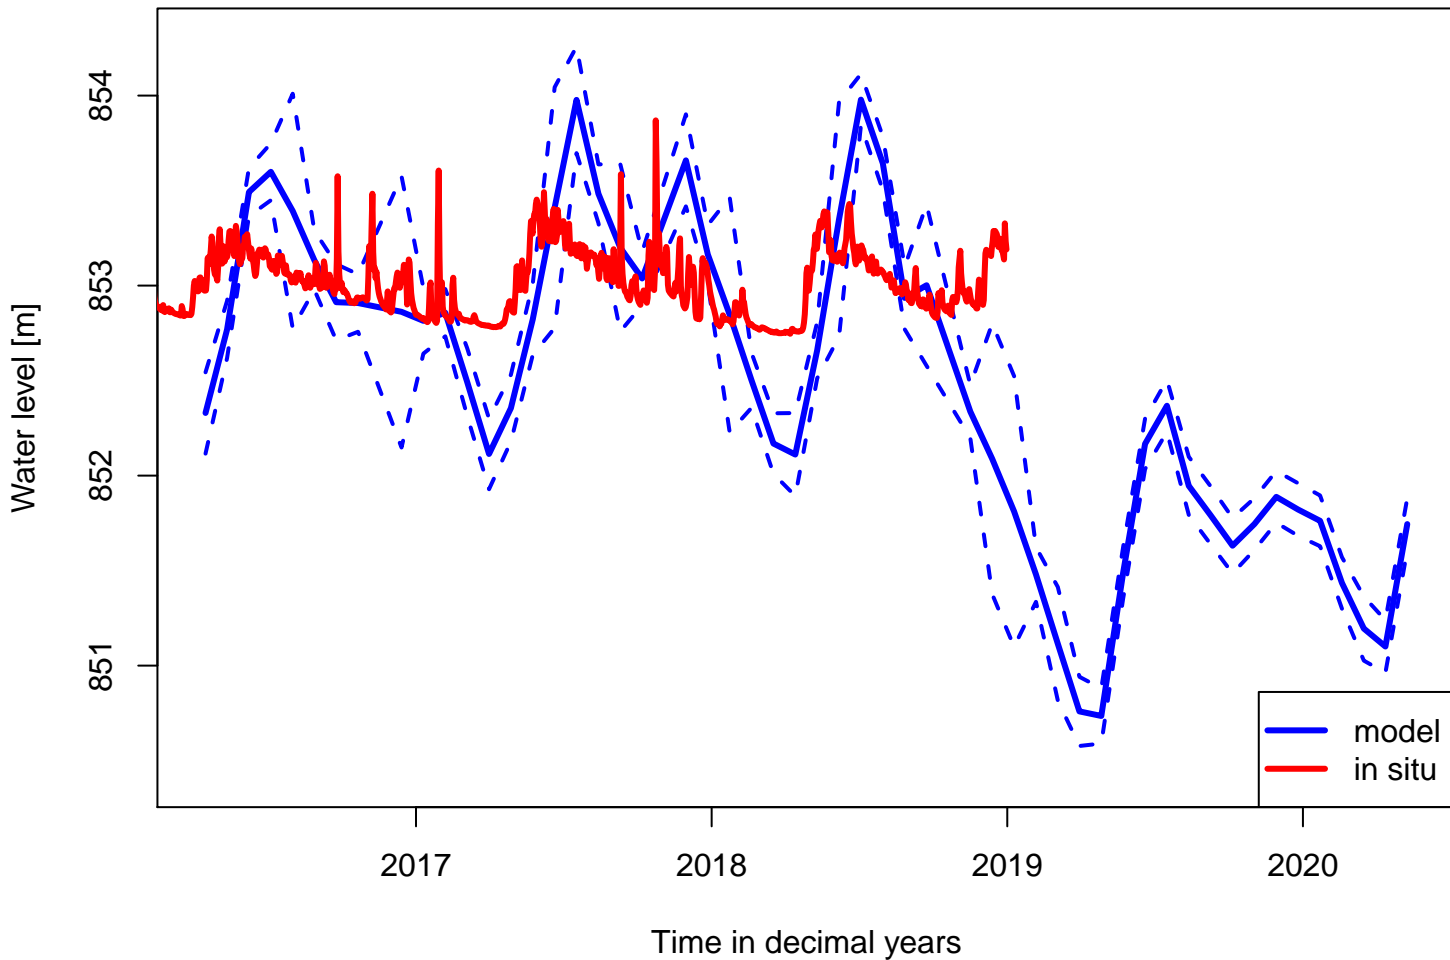

Supplement: s1 [file s1]

**lakename: Biche lakeid: 531 lat: 54.77 lon: -112**

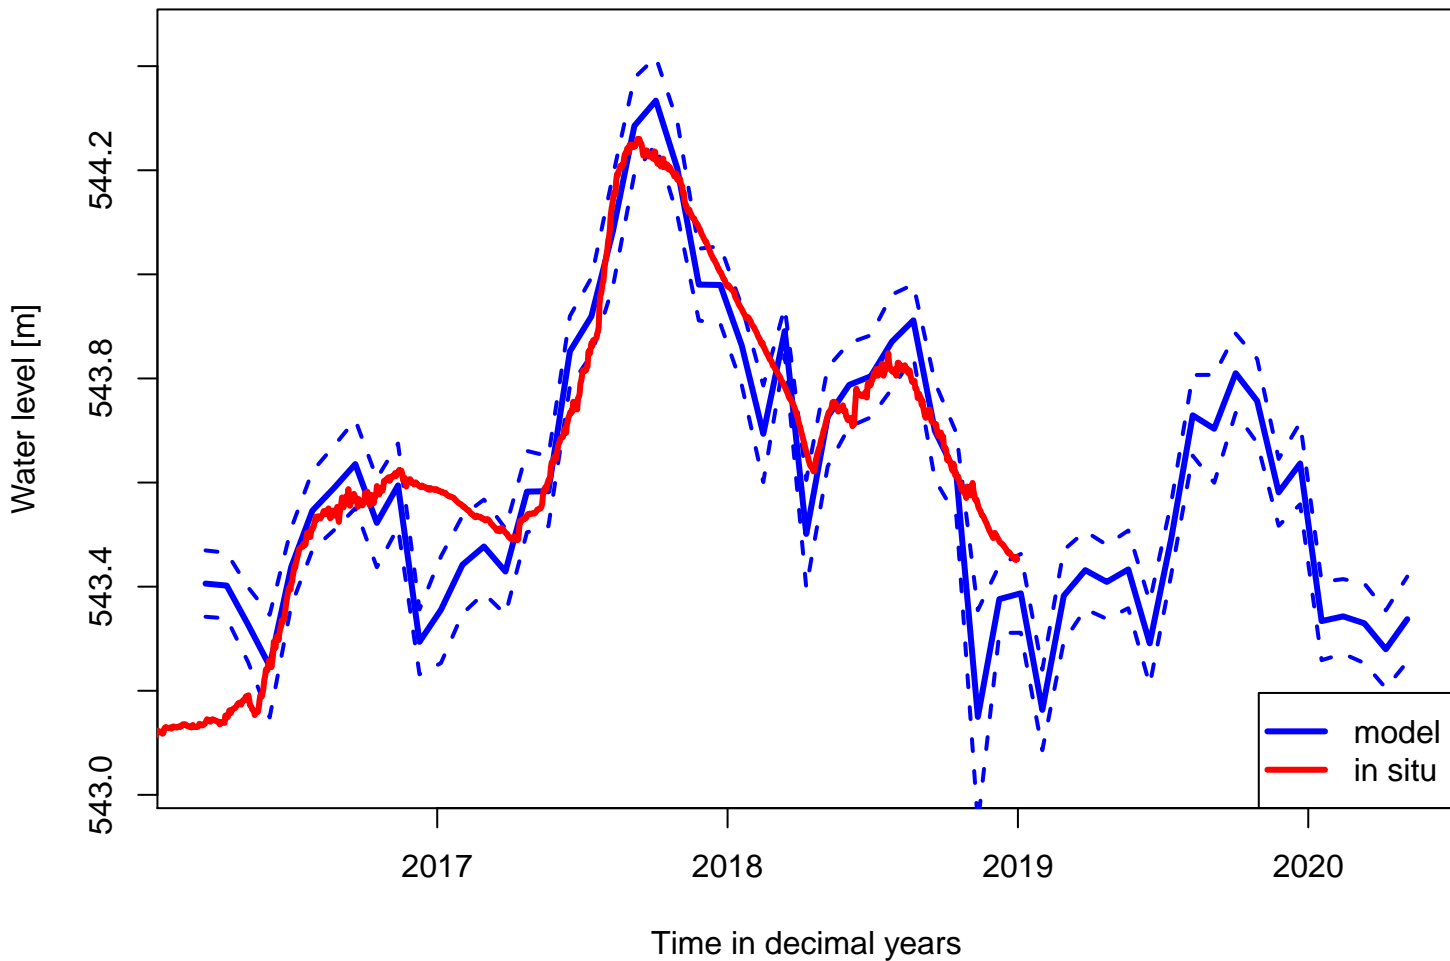

Supplement: s1 [file s1]

**lakename: Ile-a-la-Crosse lakeid: 493 lat: 55.92 lon: -107.7**

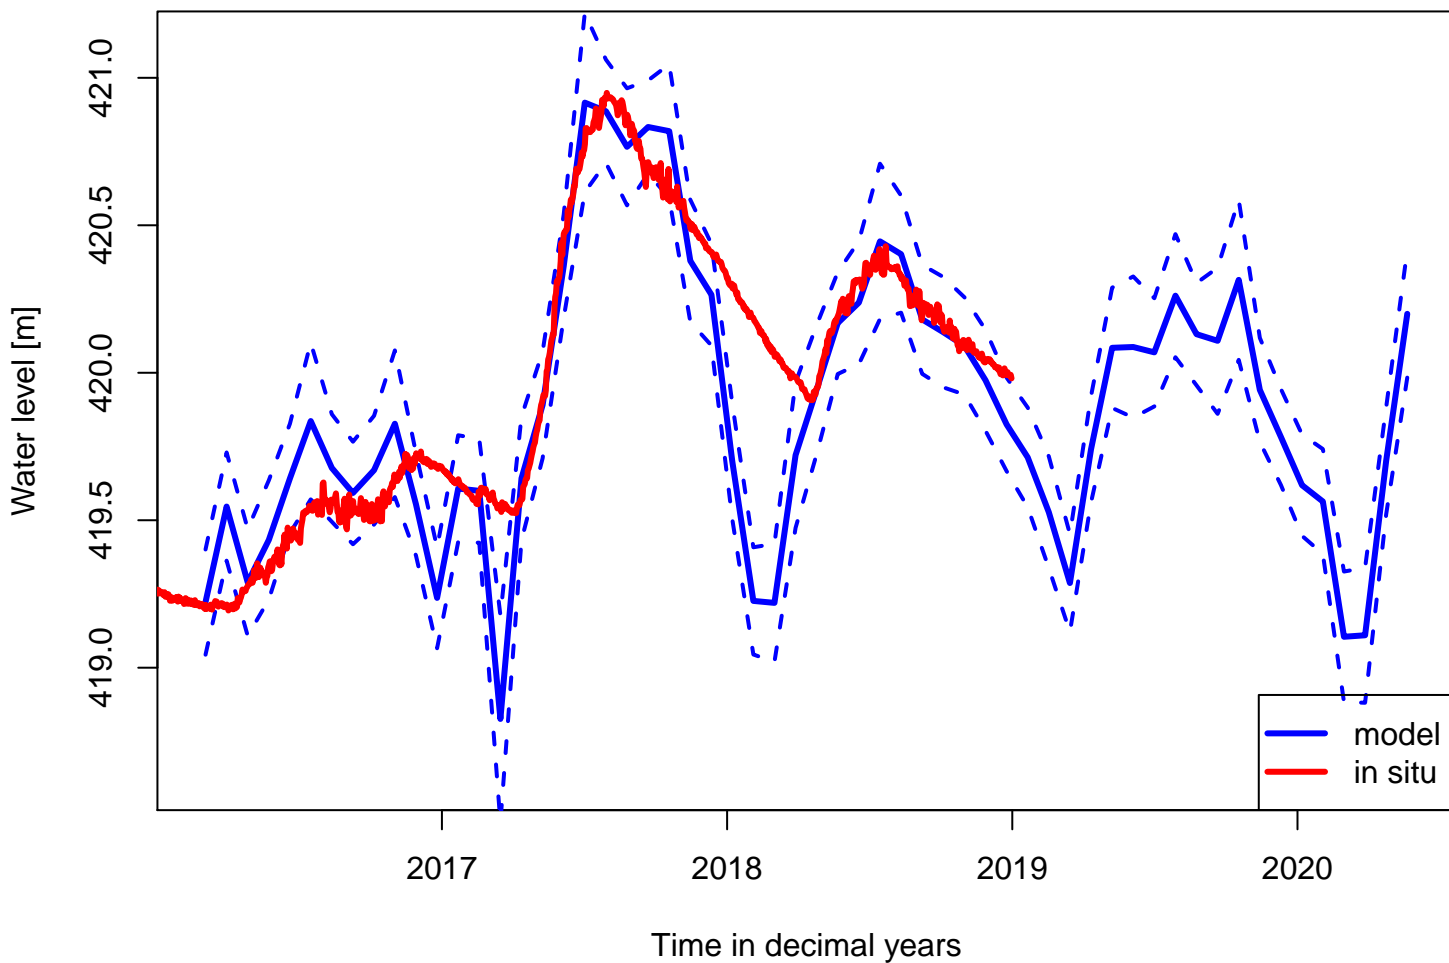

Supplement: s1 [file s1]

**lakename: Reindeer lakeid: 38 lat: 57.88 lon: -101.7**

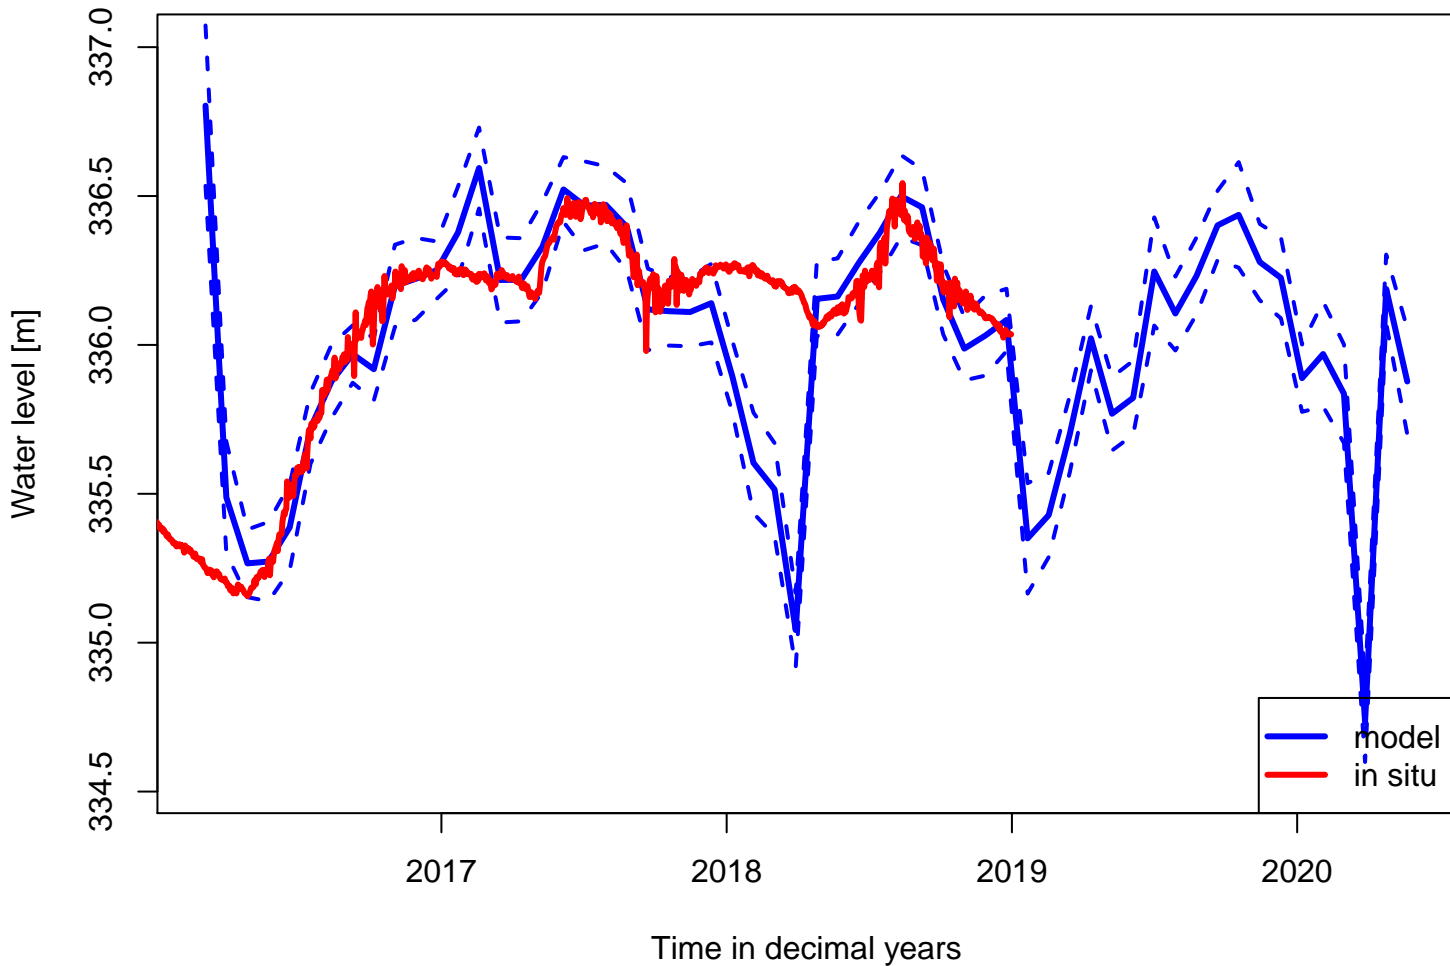

Supplement: s1 [file s1]

**lakename: lakeid: 6020 lat: 55.59 lon: -98.49**

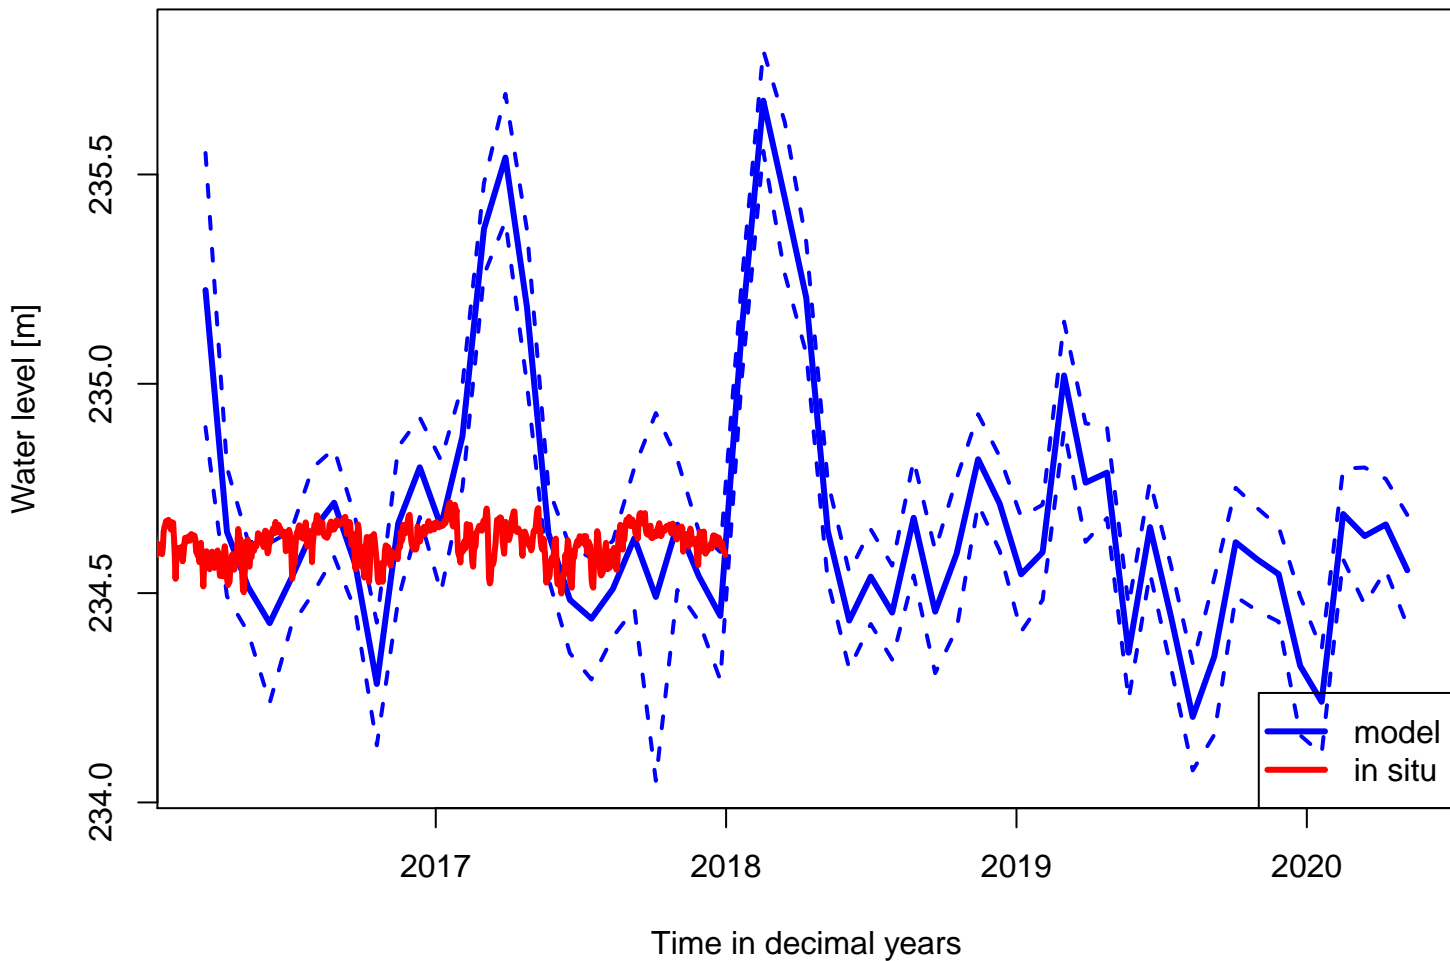

Supplement: s1 [file s1]

**lakename: Point lakeid: 278 lat: 65.4 lon: -114**

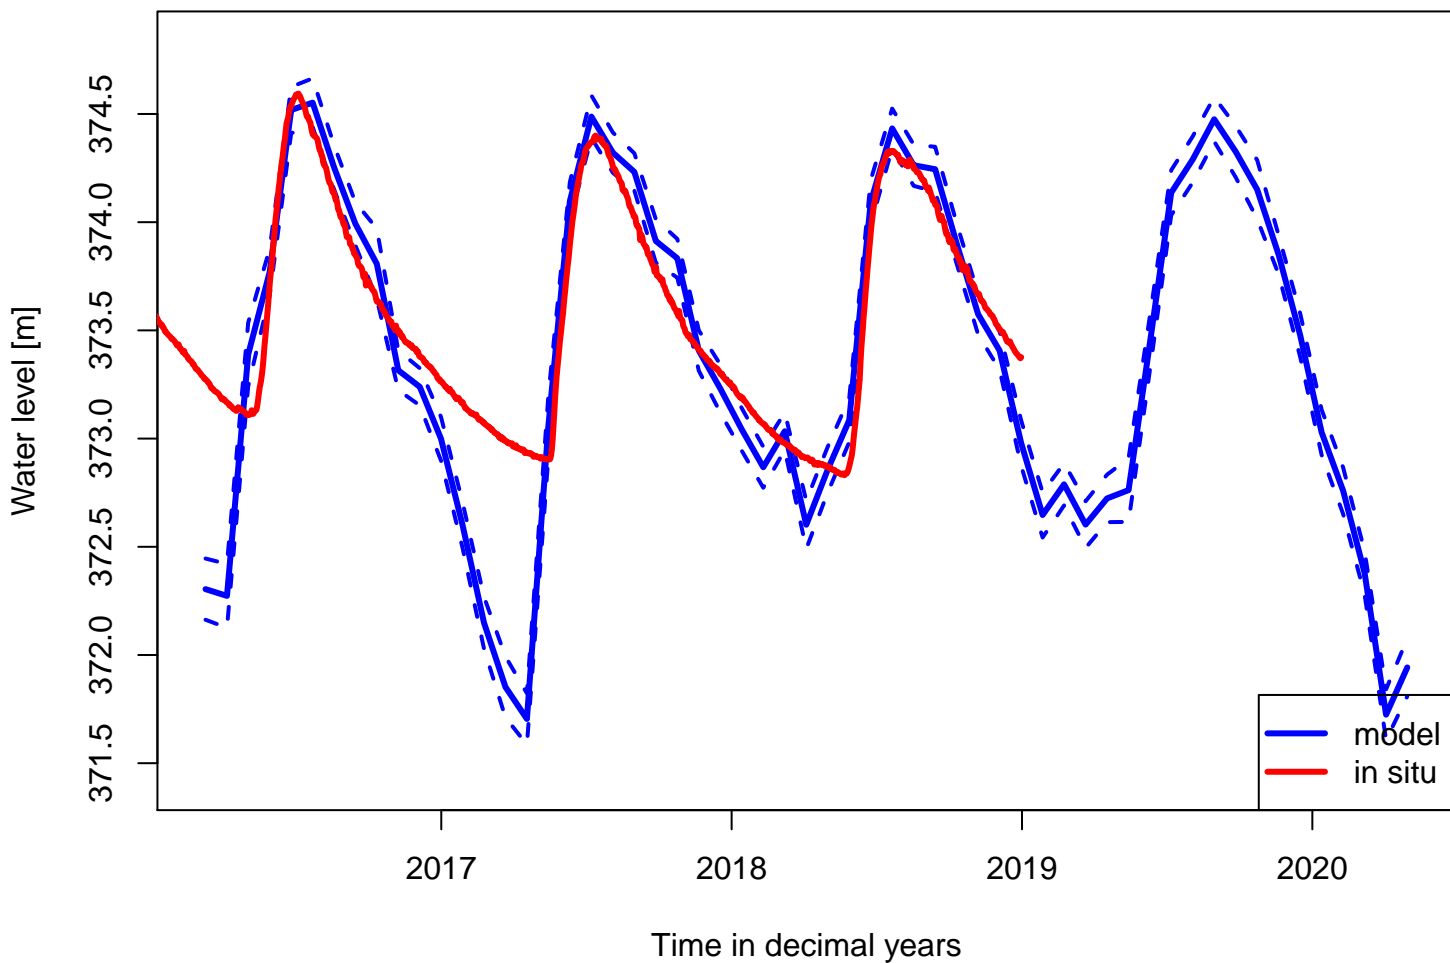

Supplement: s1 [file s1]

**lakename: Southern Indian lakeid: 37 lat: 56.69 lon: -99.02**

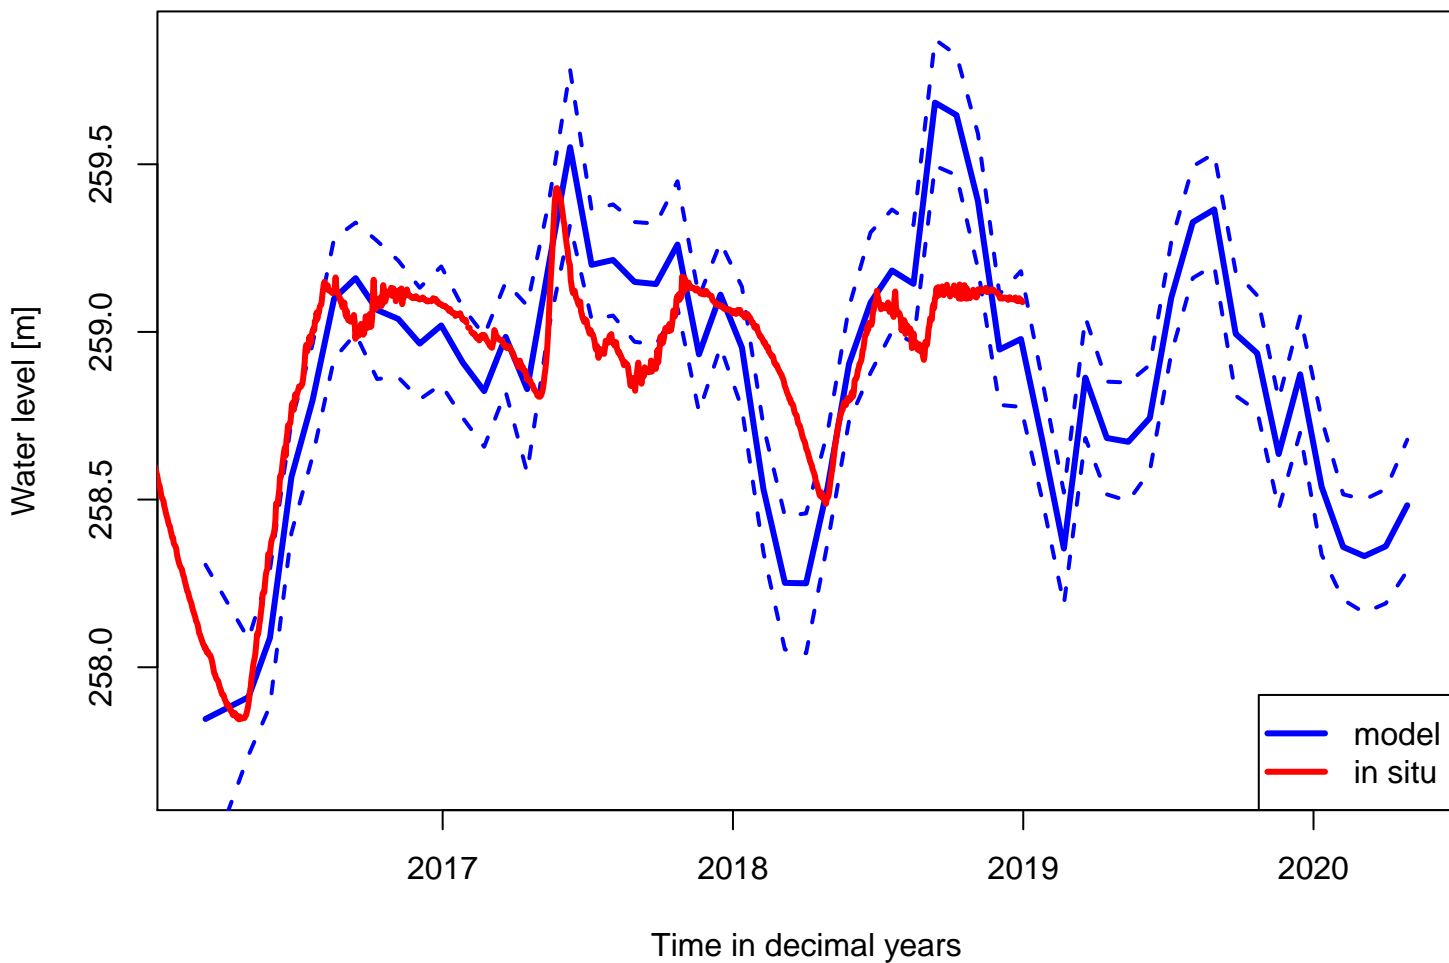

Supplement: s1 [file s1]

**lakename: lakeid: 478 lat: 56.34 lon: -101.4**

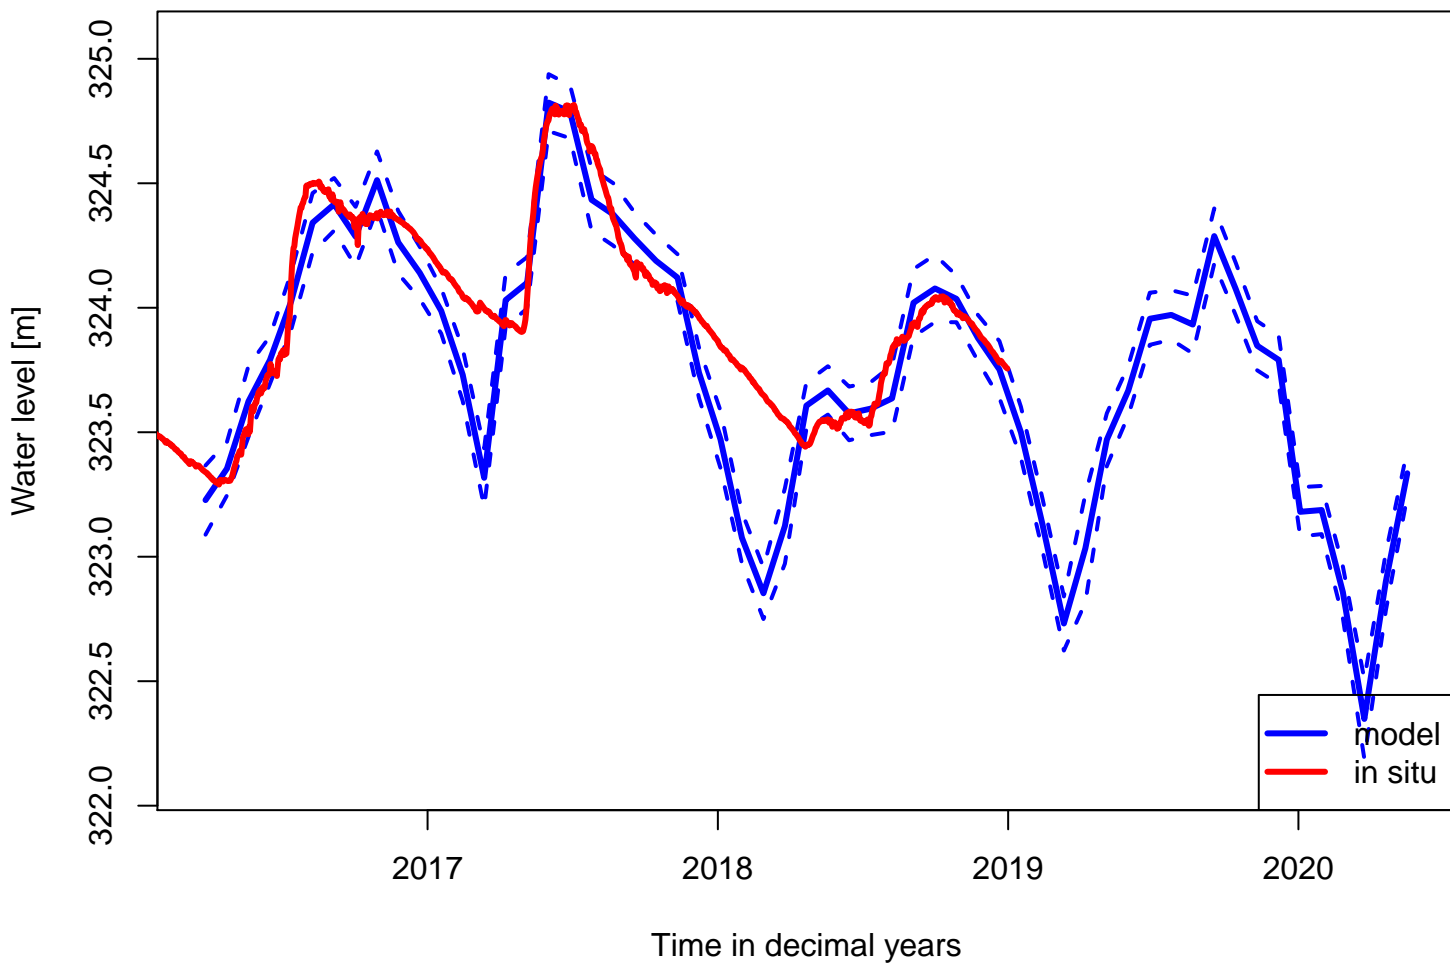

Supplement: s1 [file s1]

**lakename: lakeid: 8244 lat: 48.82 lon: -124.1**

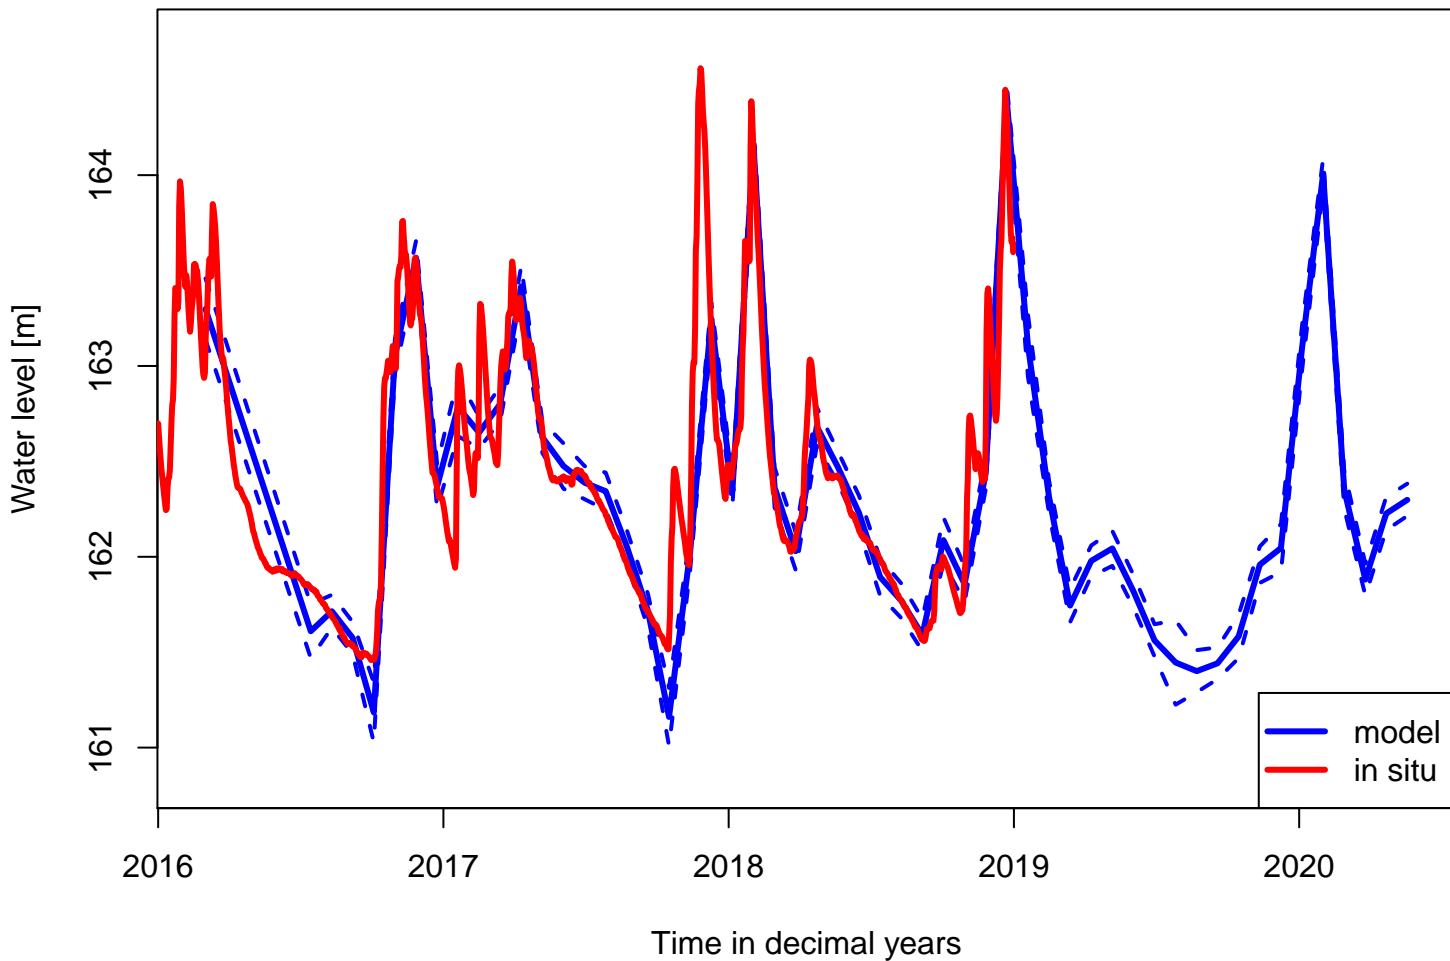

Supplement: s1 [file s1]

**lakename: Melville lakeid: 50 lat: 53.33 lon: -60.19**

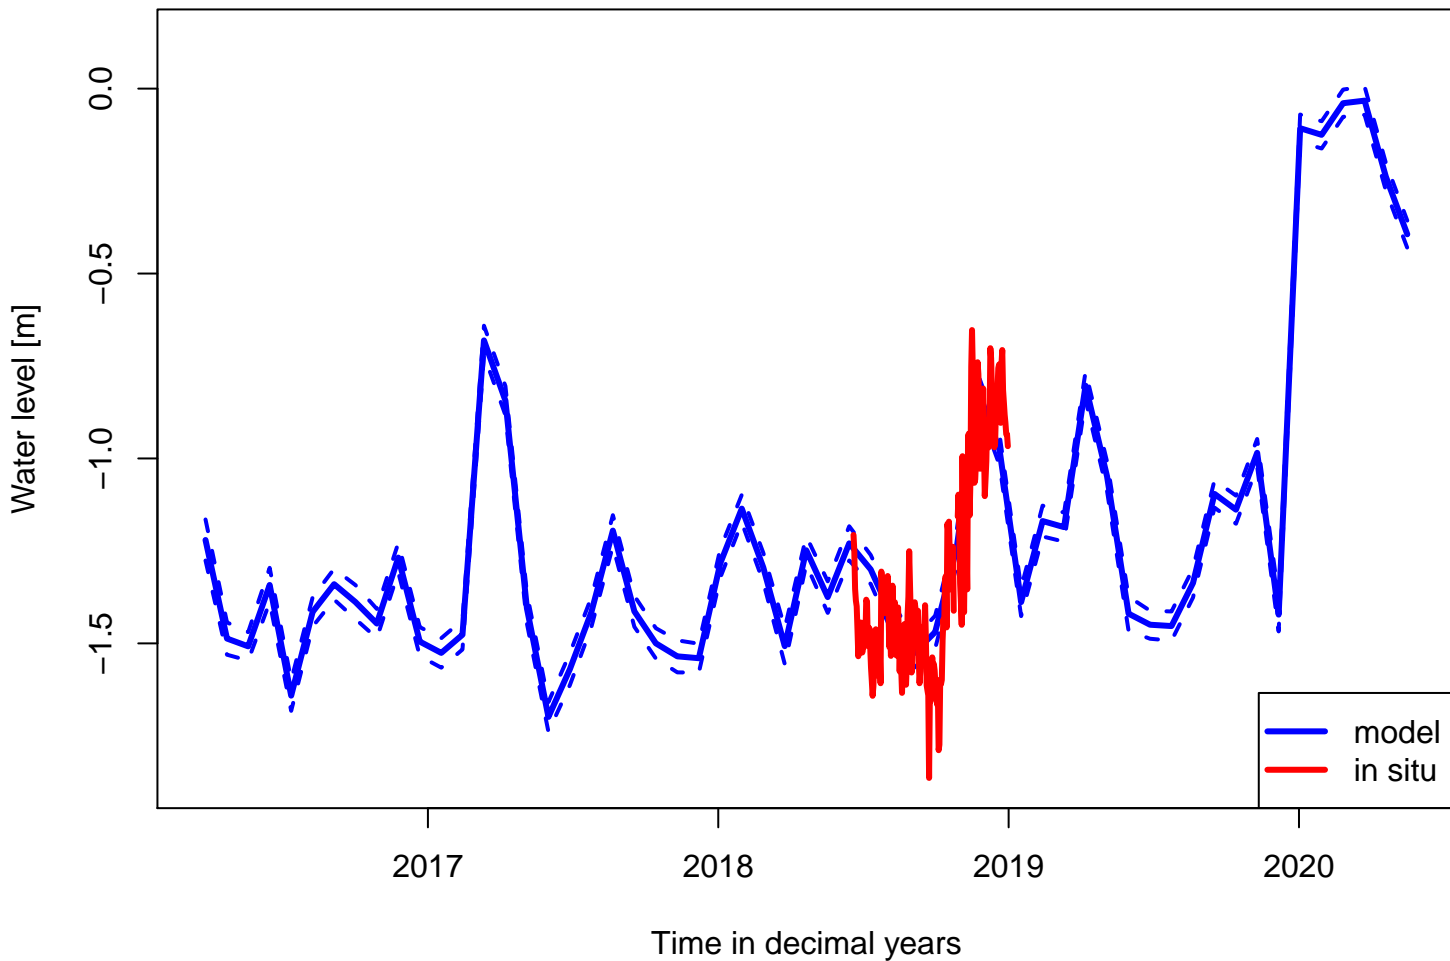

Supplement: s1 [file s1]

**lakename: Seul lakeid: 56 lat: 50.32 lon: -92.27**

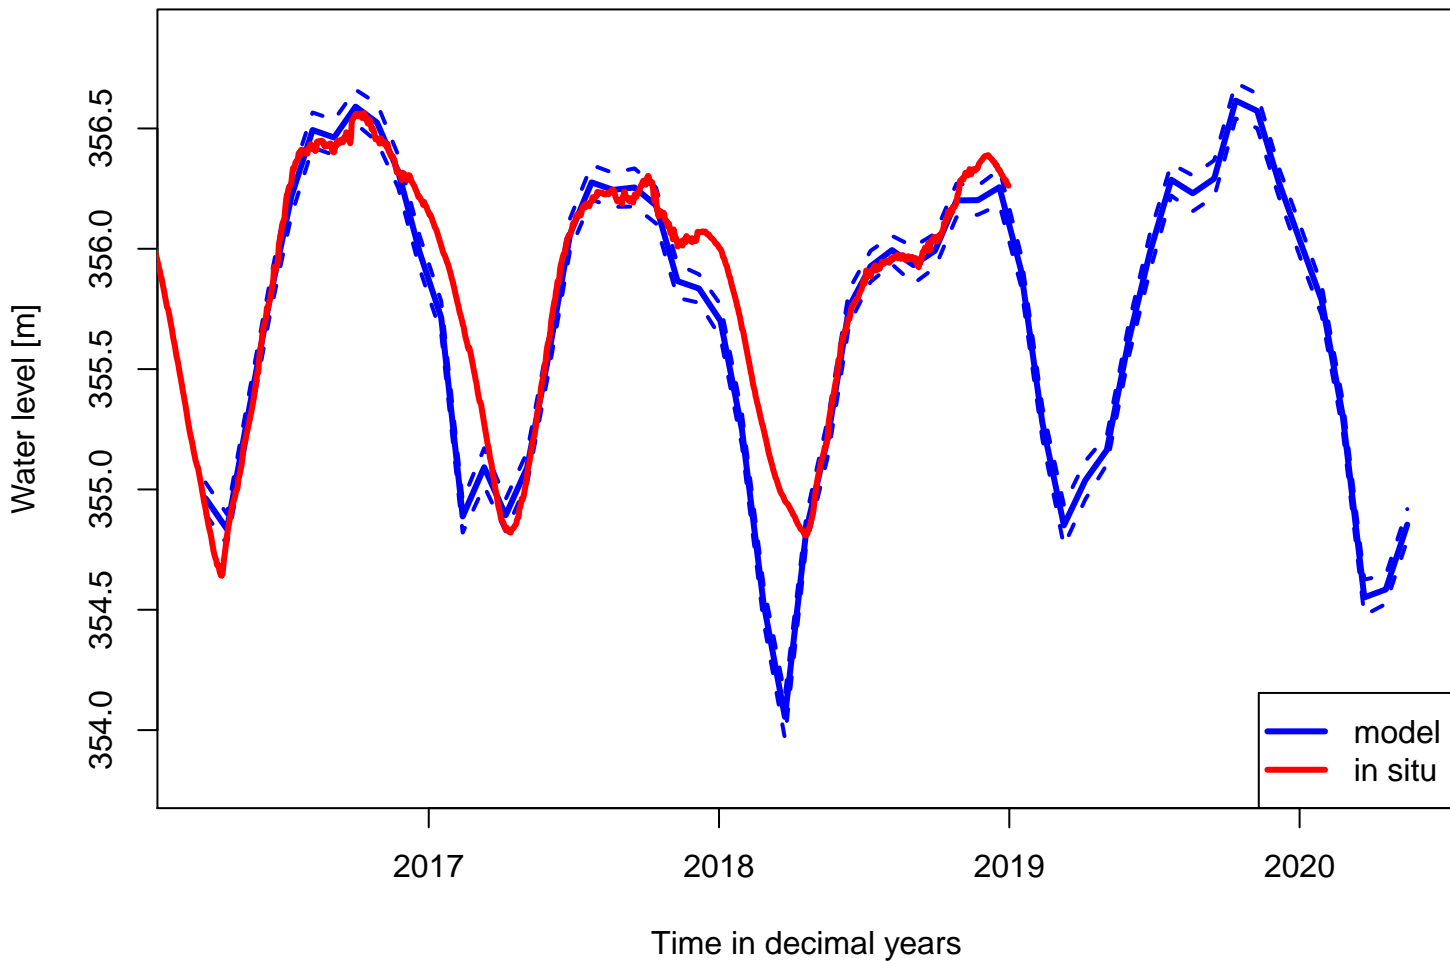

Supplement: s1 [file s1]

**lakename: Mille Lacs lakeid: 746 lat: 46.11 lon: -93.62**

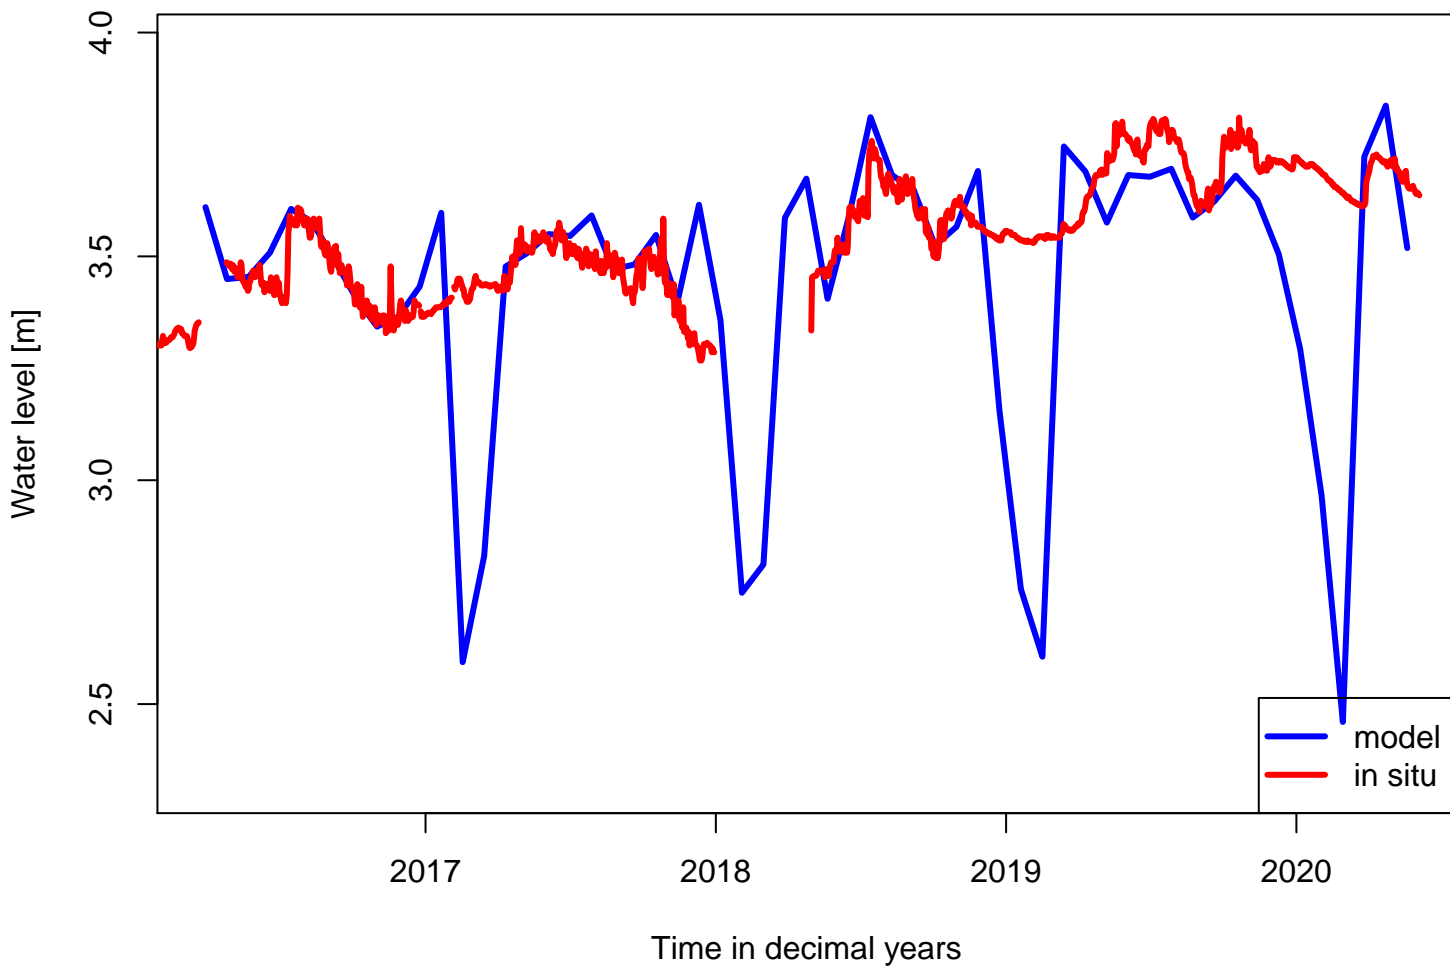

Supplement: s1 [file s1]

**lakename: lakeid: 753 lat: 45.4 lon: -73.96**

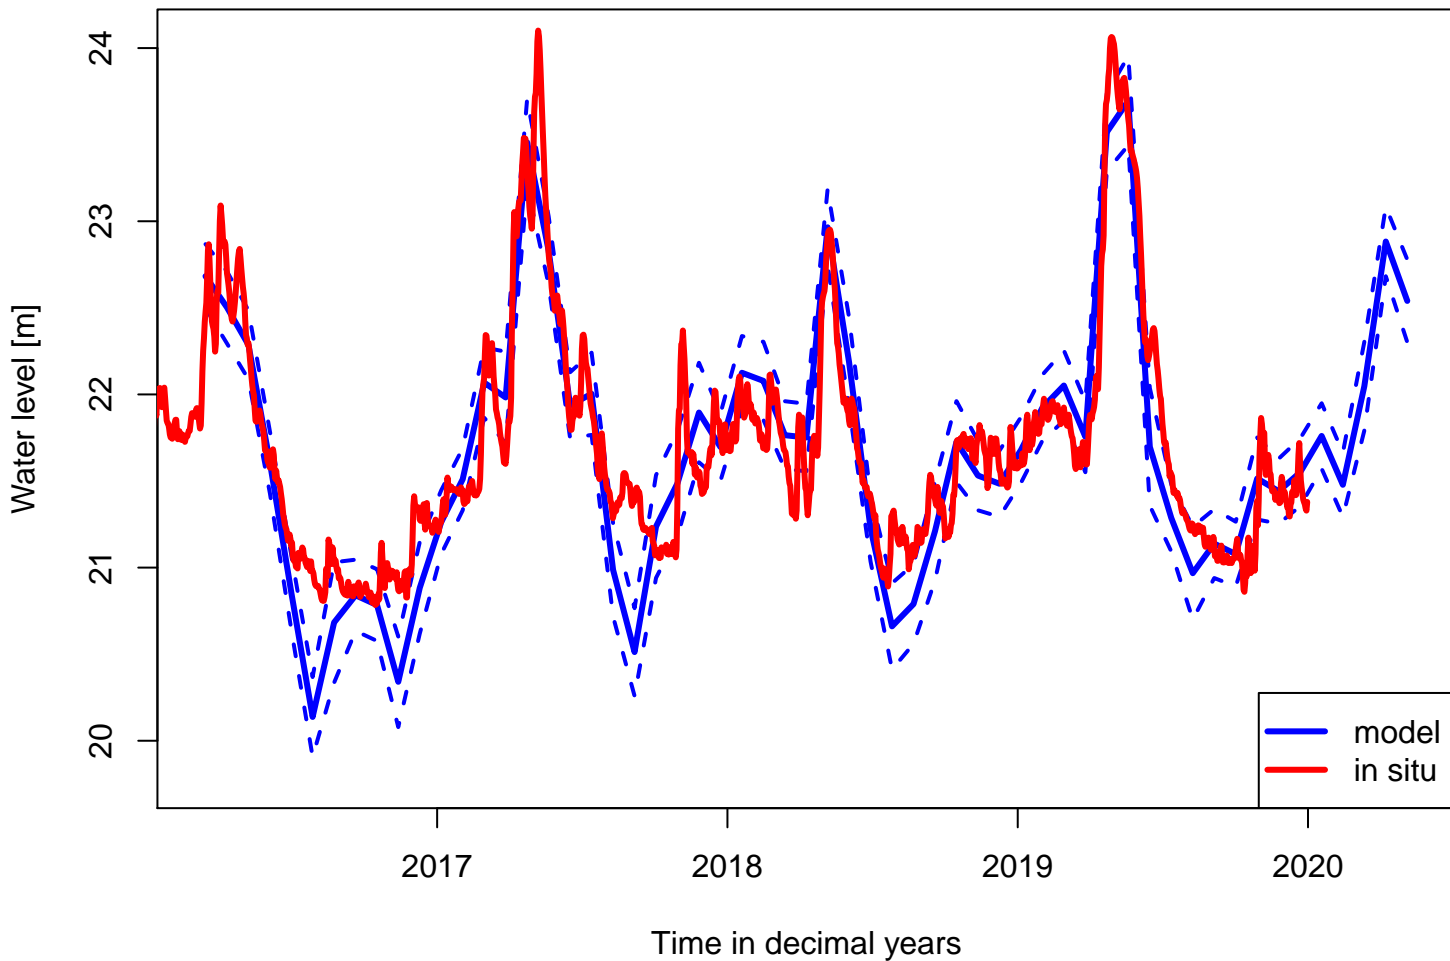

Supplement: s1 [file s1]

**lakename: Red Lake Reservoir lakeid: 61 lat: 47.96 lon: -95.28**

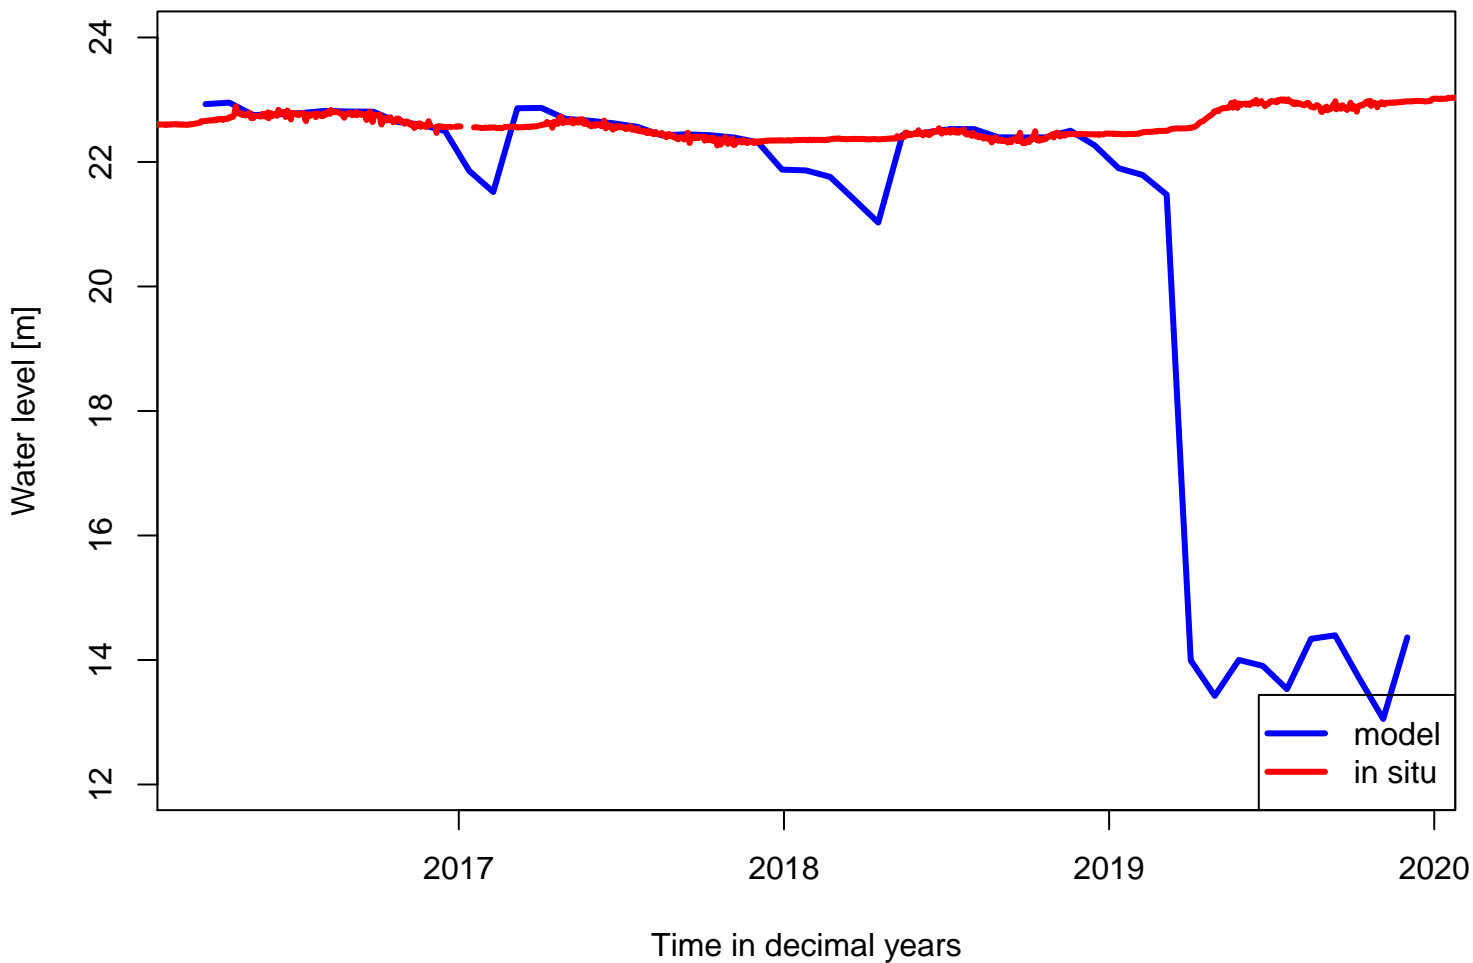

Supplement: s1 [file s1]

**lakename: Biche lakeid: 531 lat: 54.77 lon: -112**

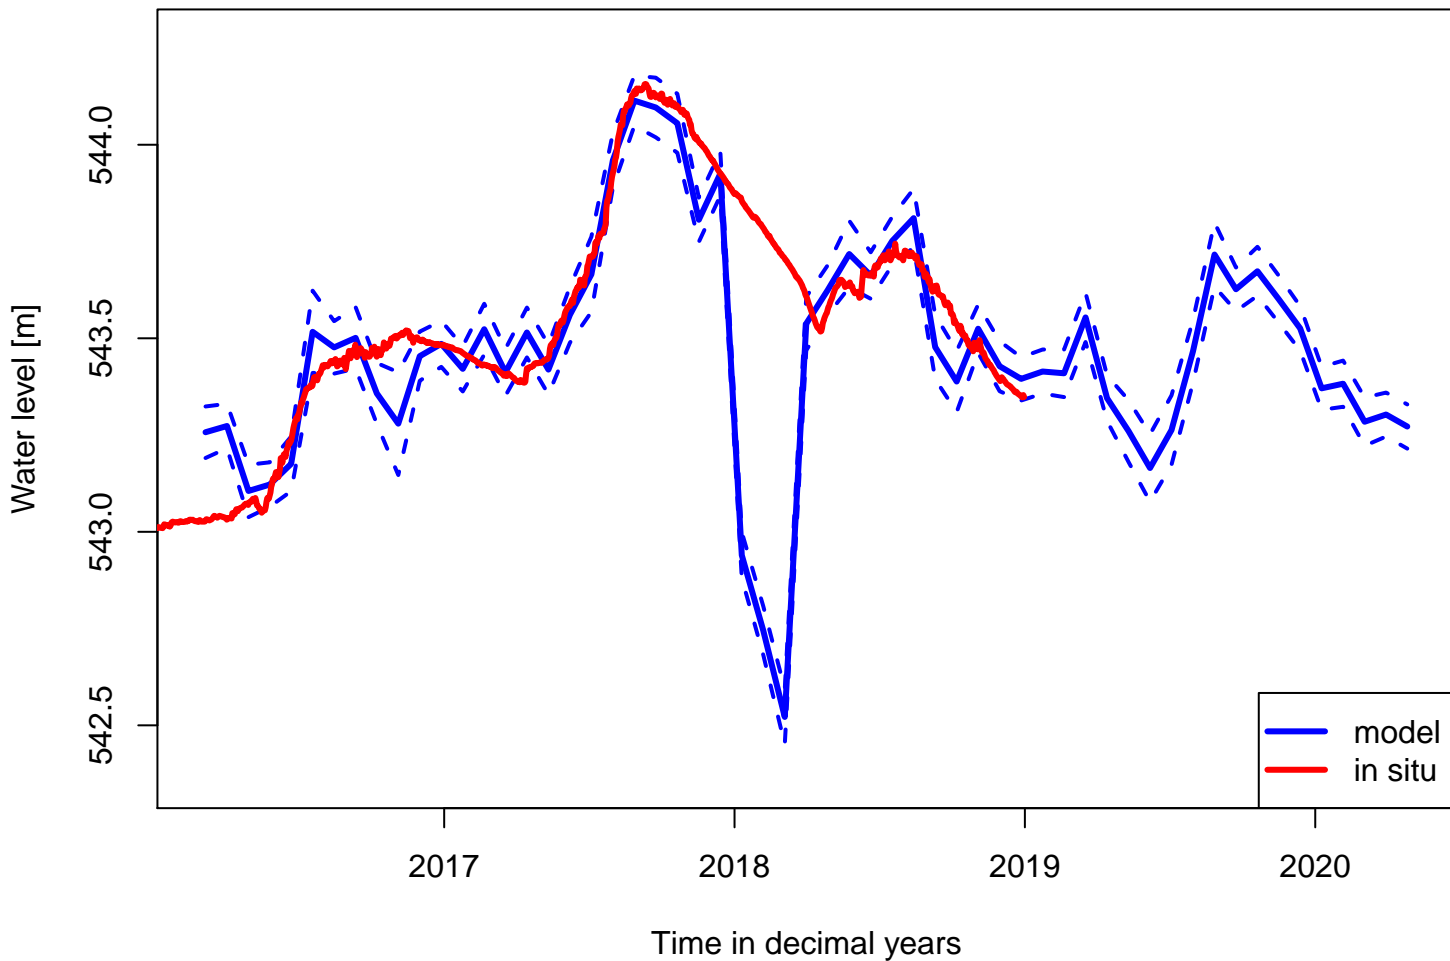

Supplement: s1 [file s1]

**lakename: lakeid: 631 lat: 51.78 lon: -104.3**

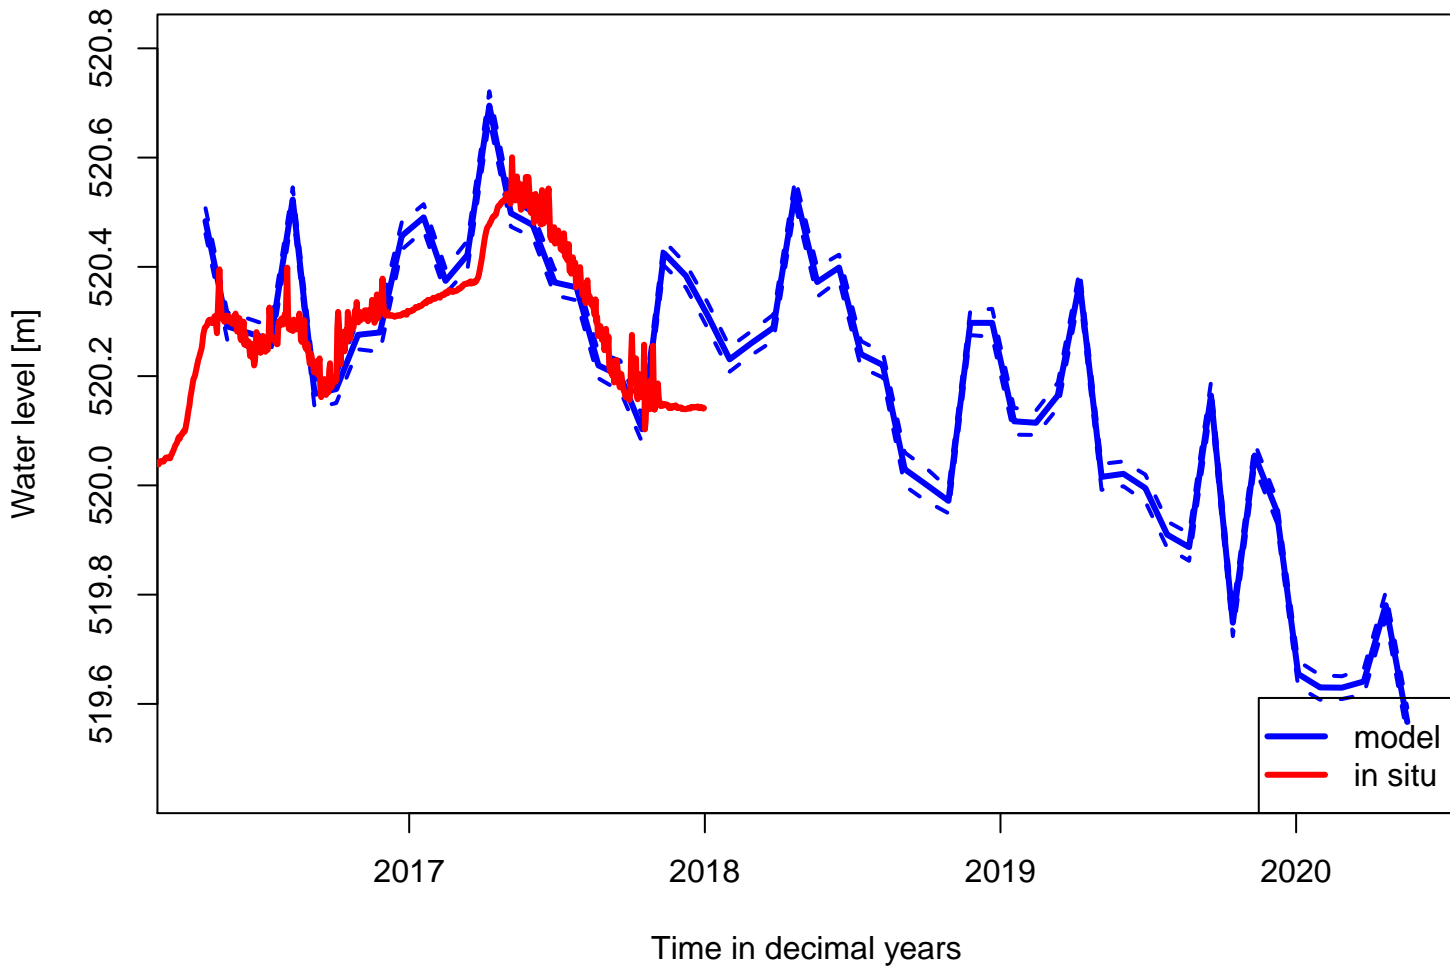

Supplement: s1 [file s1]

**lakename: La Ronge lakeid: 41 lat: 55.1 lon: -105.3**

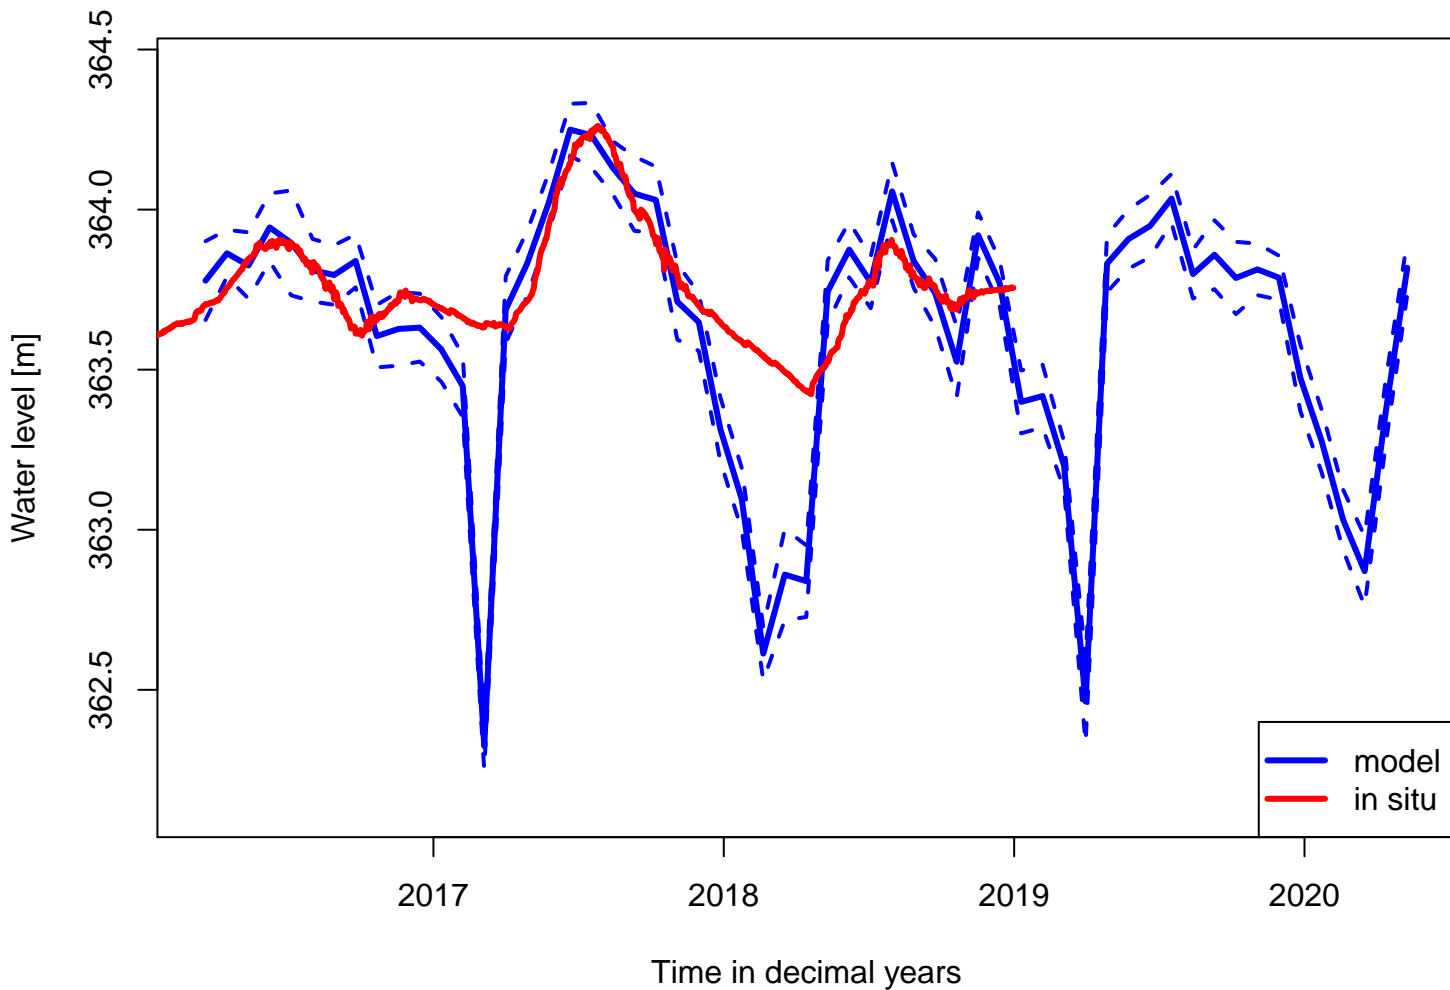

Supplement: s1 [file s1]

**lakename: Rainy lakeid: 710 lat: 48.7 lon: -92.96**

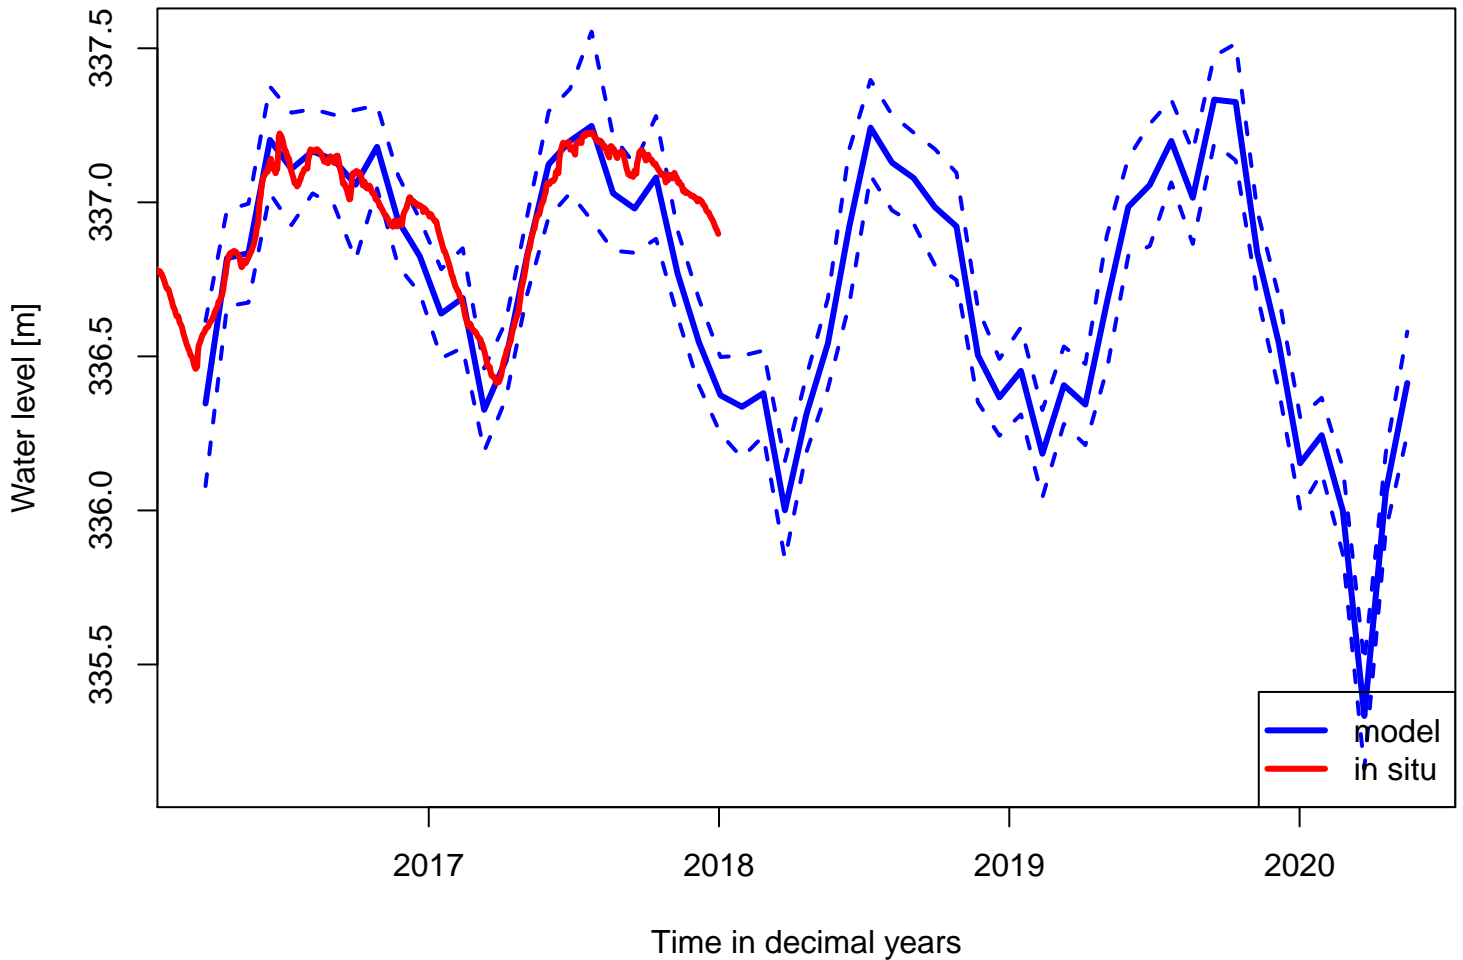

Supplement: s1 [file s1]

**lakename: lakeid: 242 lat: 65.93 lon: -91.07**

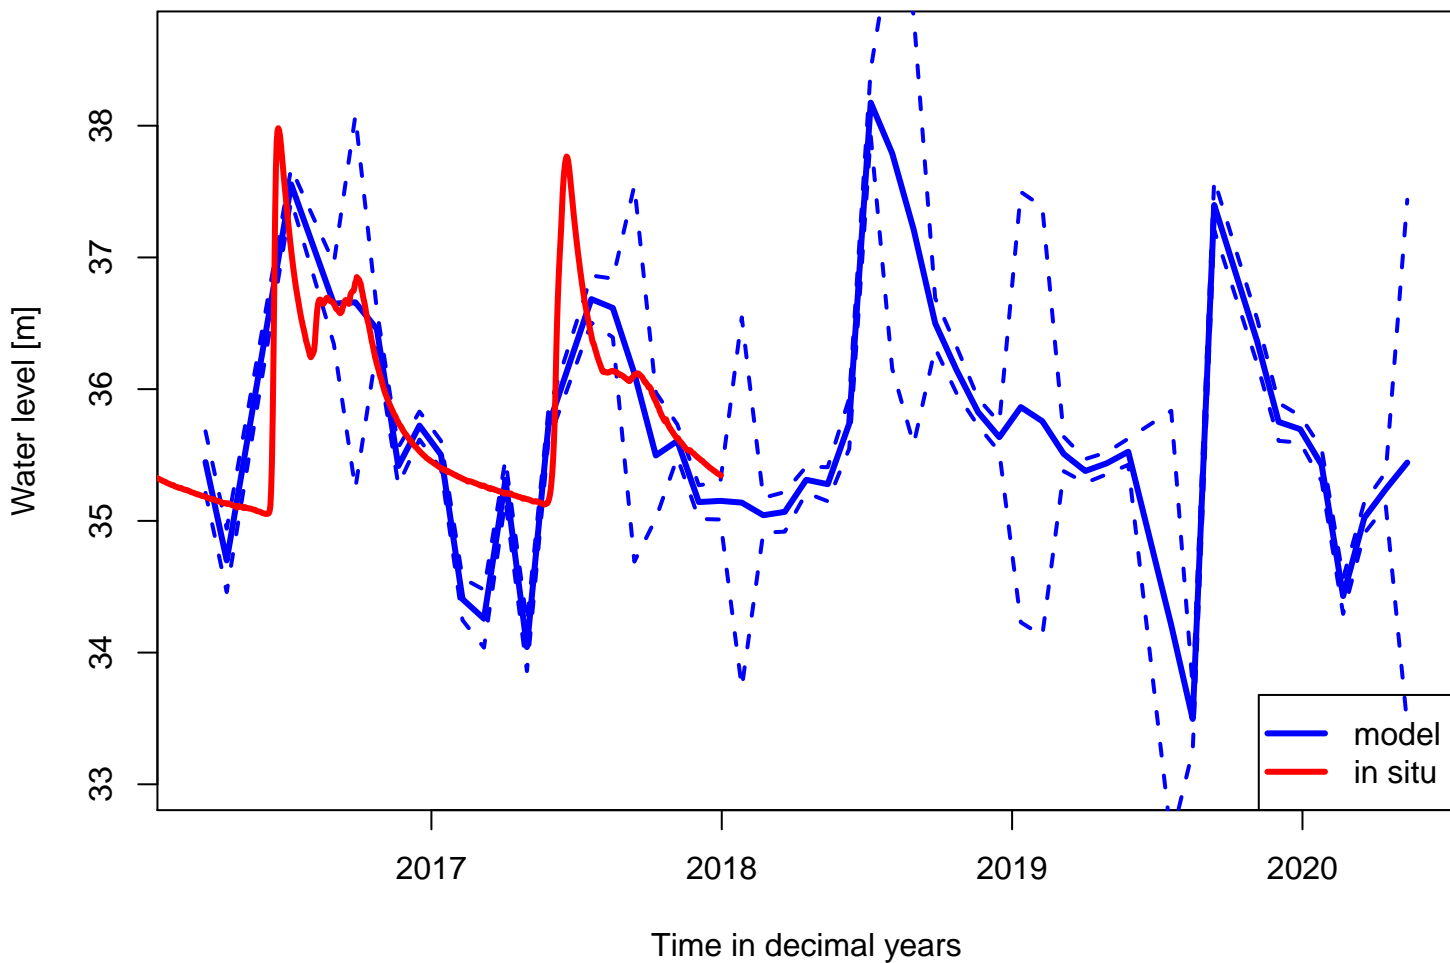

Supplement: s1 [file s1]

**lakename: Woods lakeid: 57 lat: 48.9 lon: -95.32**

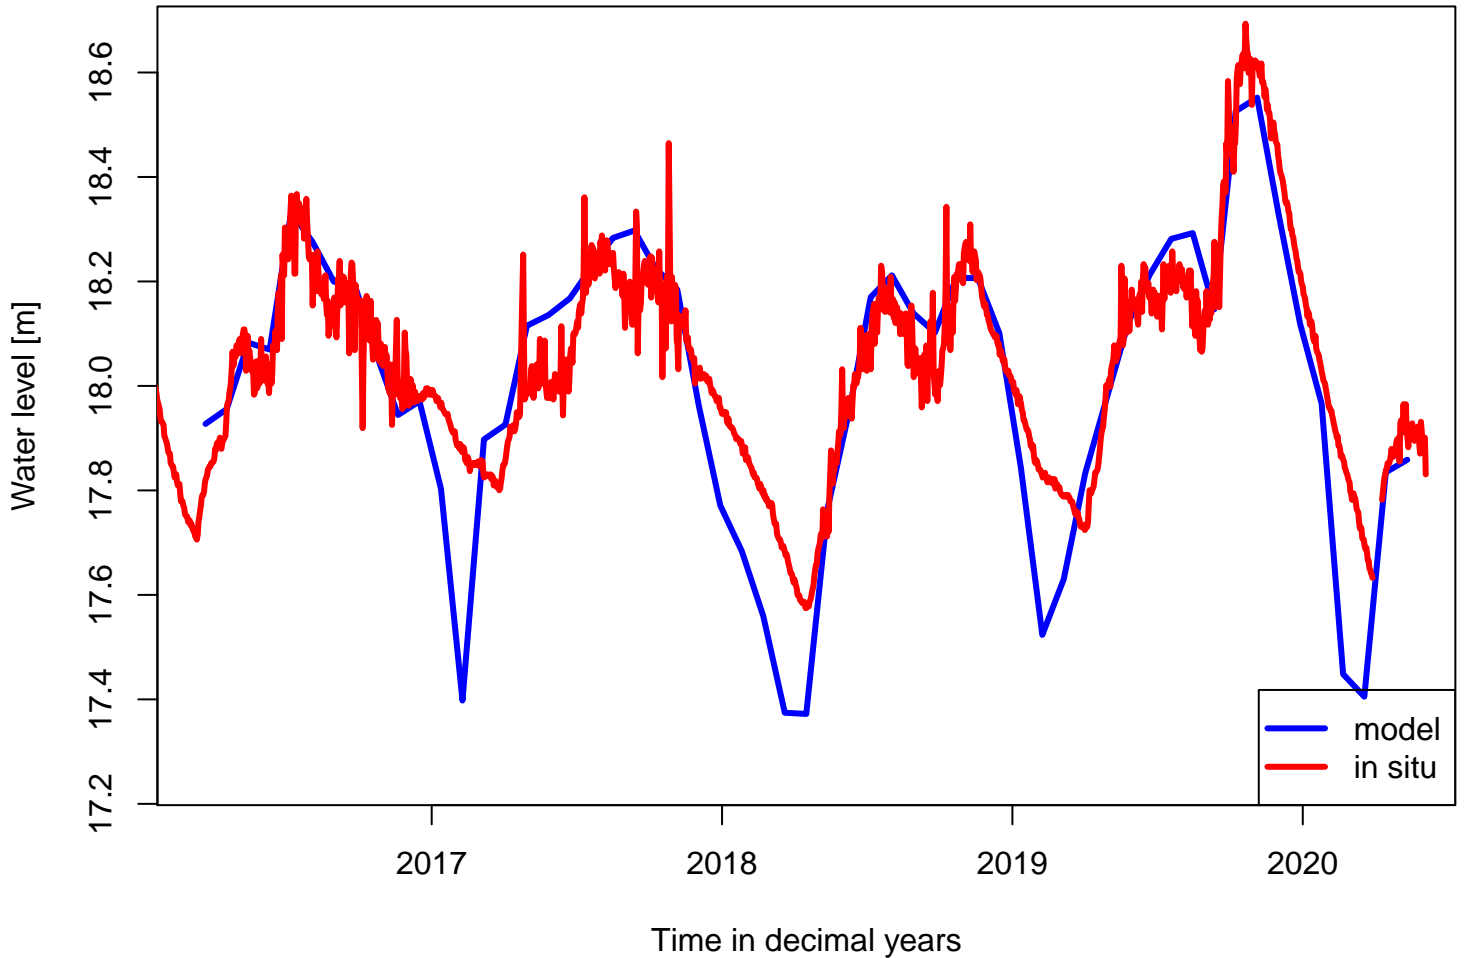

Supplement: s1 [file s1]

**lakename: Seul lakeid: 56 lat: 50.32 lon: -92.27**

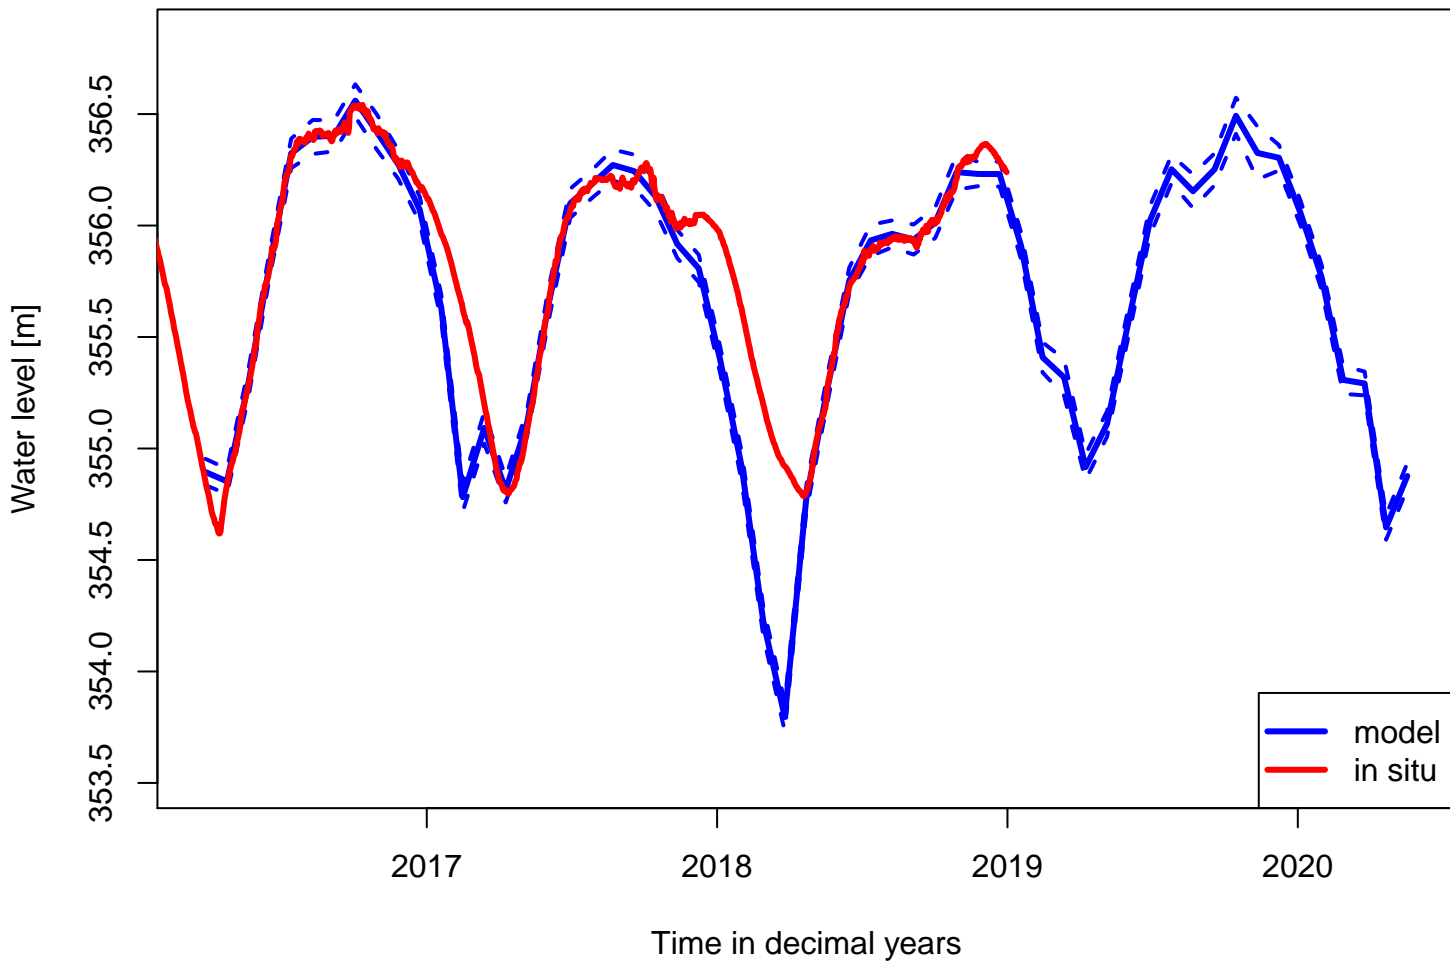

Supplement: s1 [file s1]

**lakename: Winnipegosis lakeid: 52 lat: 52.97 lon: -101**

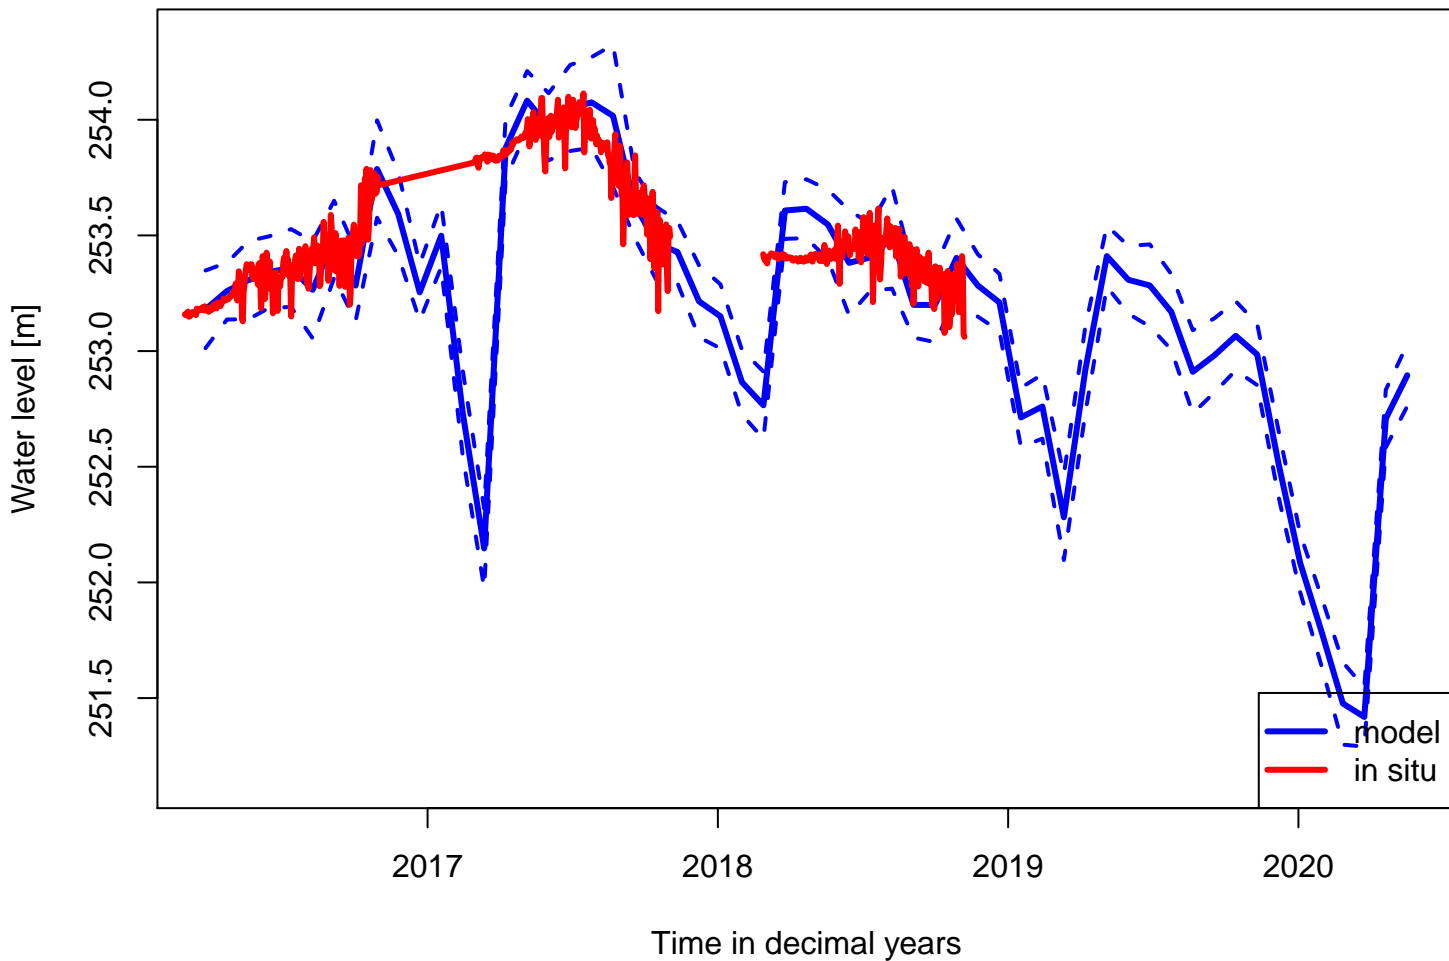

Supplement: s1 [file s1]

**lakename: Seul lakeid: 56 lat: 50.32 lon: -92.27**

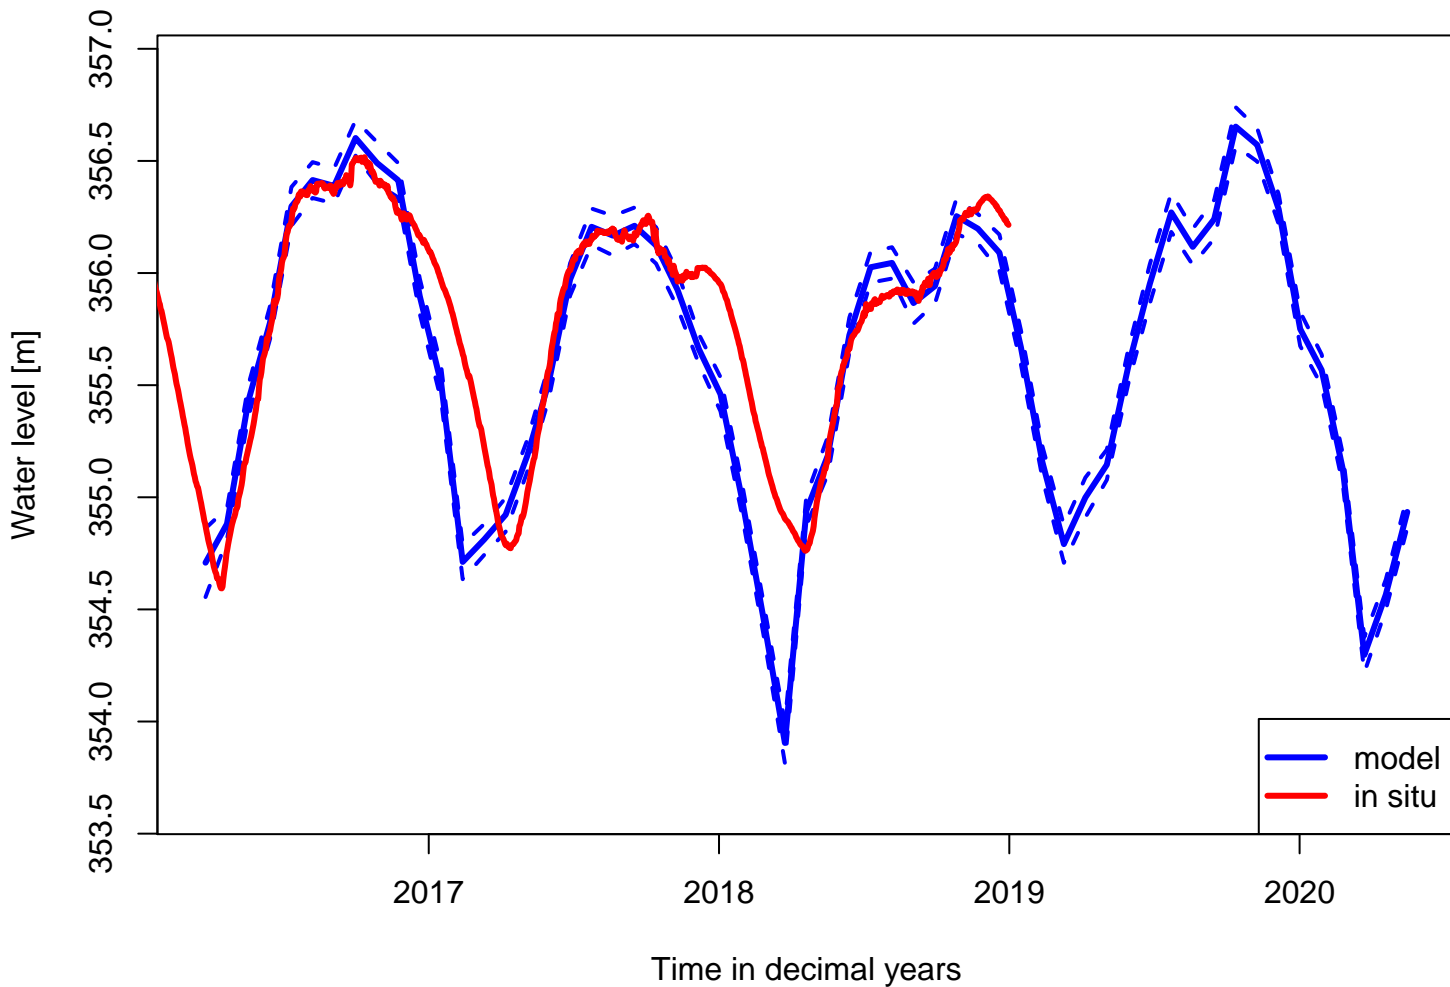

Supplement: s1 [file s1]

**lakename: Melville lakeid: 50 lat: 53.59 lon: -59.48**

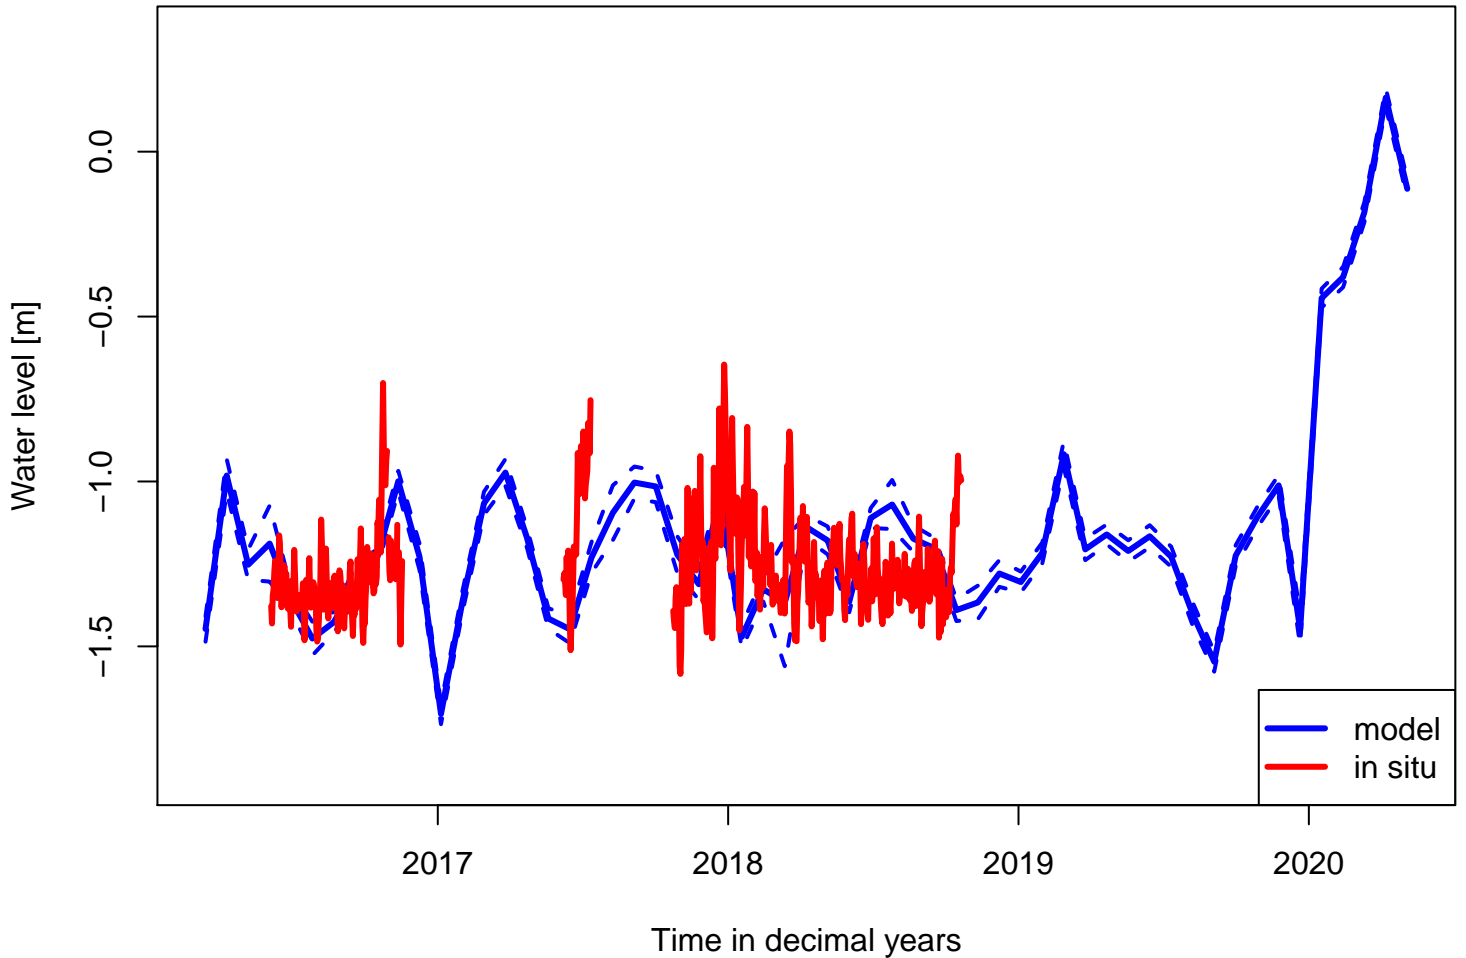

Supplement: s1 [file s1]

**lakename: Ennadai lakeid: 370 lat: 61.11 lon: -101**

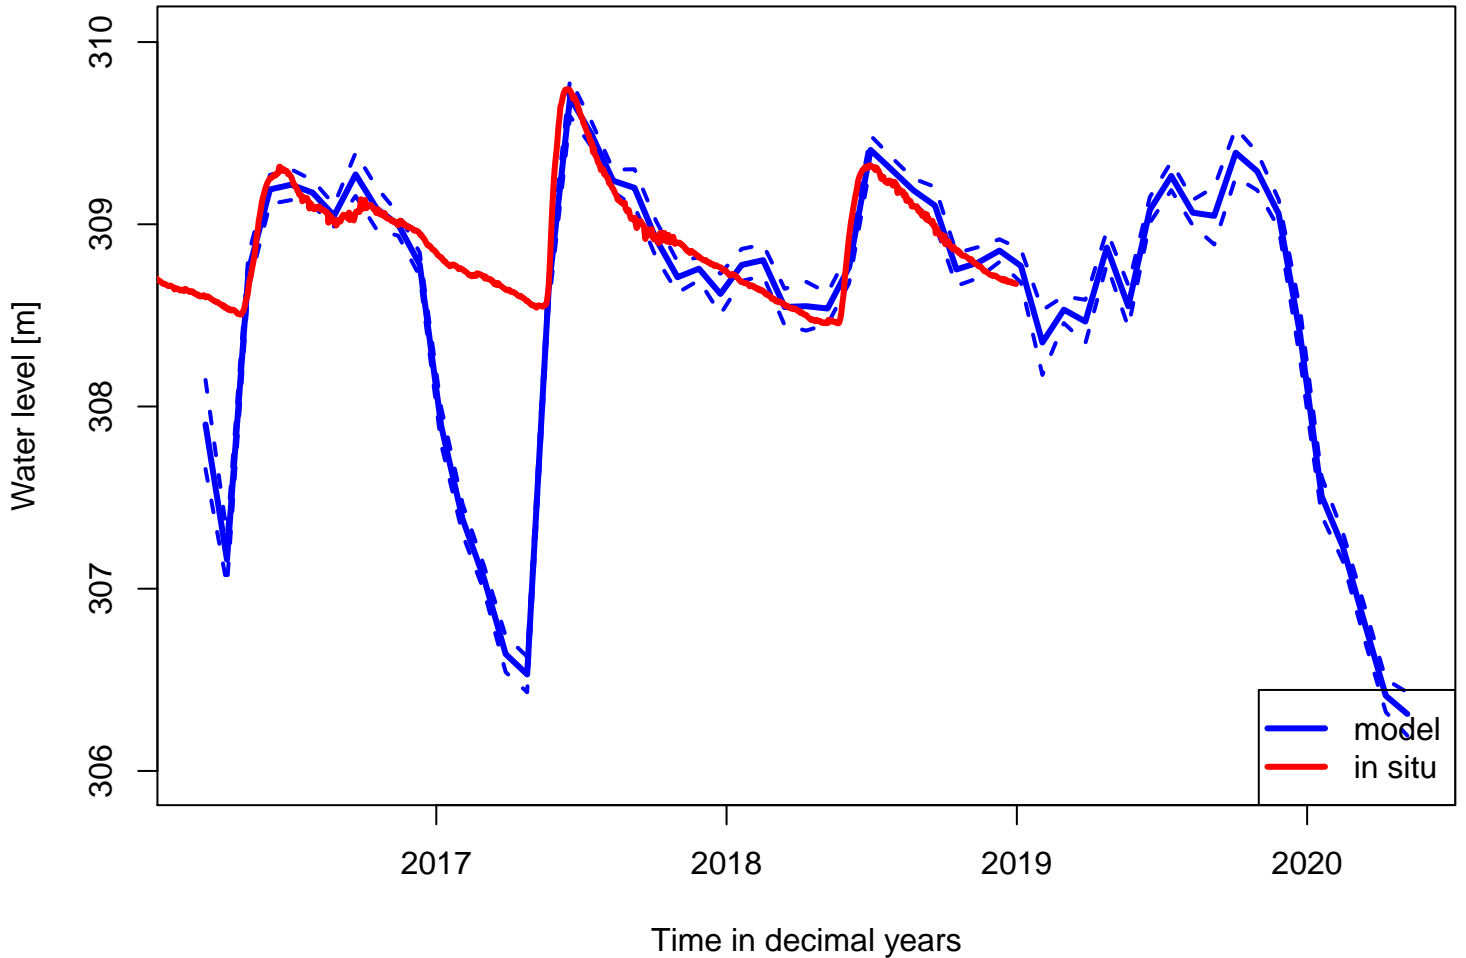

Supplement: s1 [file s1]

**lakename: Moose lakeid: 48 lat: 53.94 lon: -100.1**

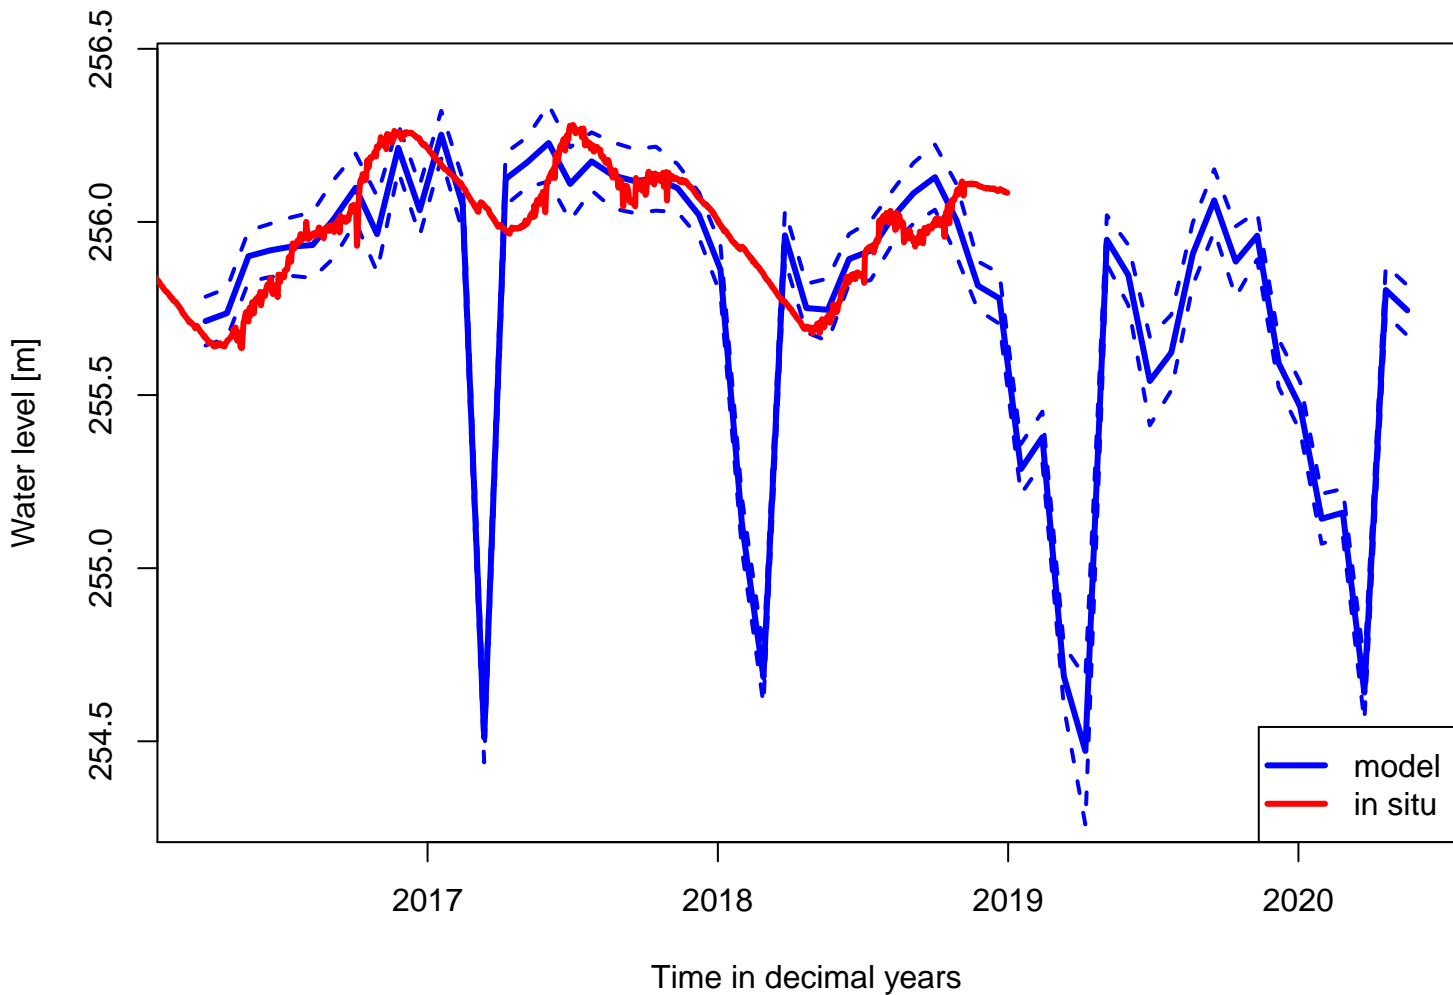

Supplement: s1 [file s1]

**lakename: Sacandaga Reservoir lakeid: 9074 lat: 43.32 lon: -73.93**

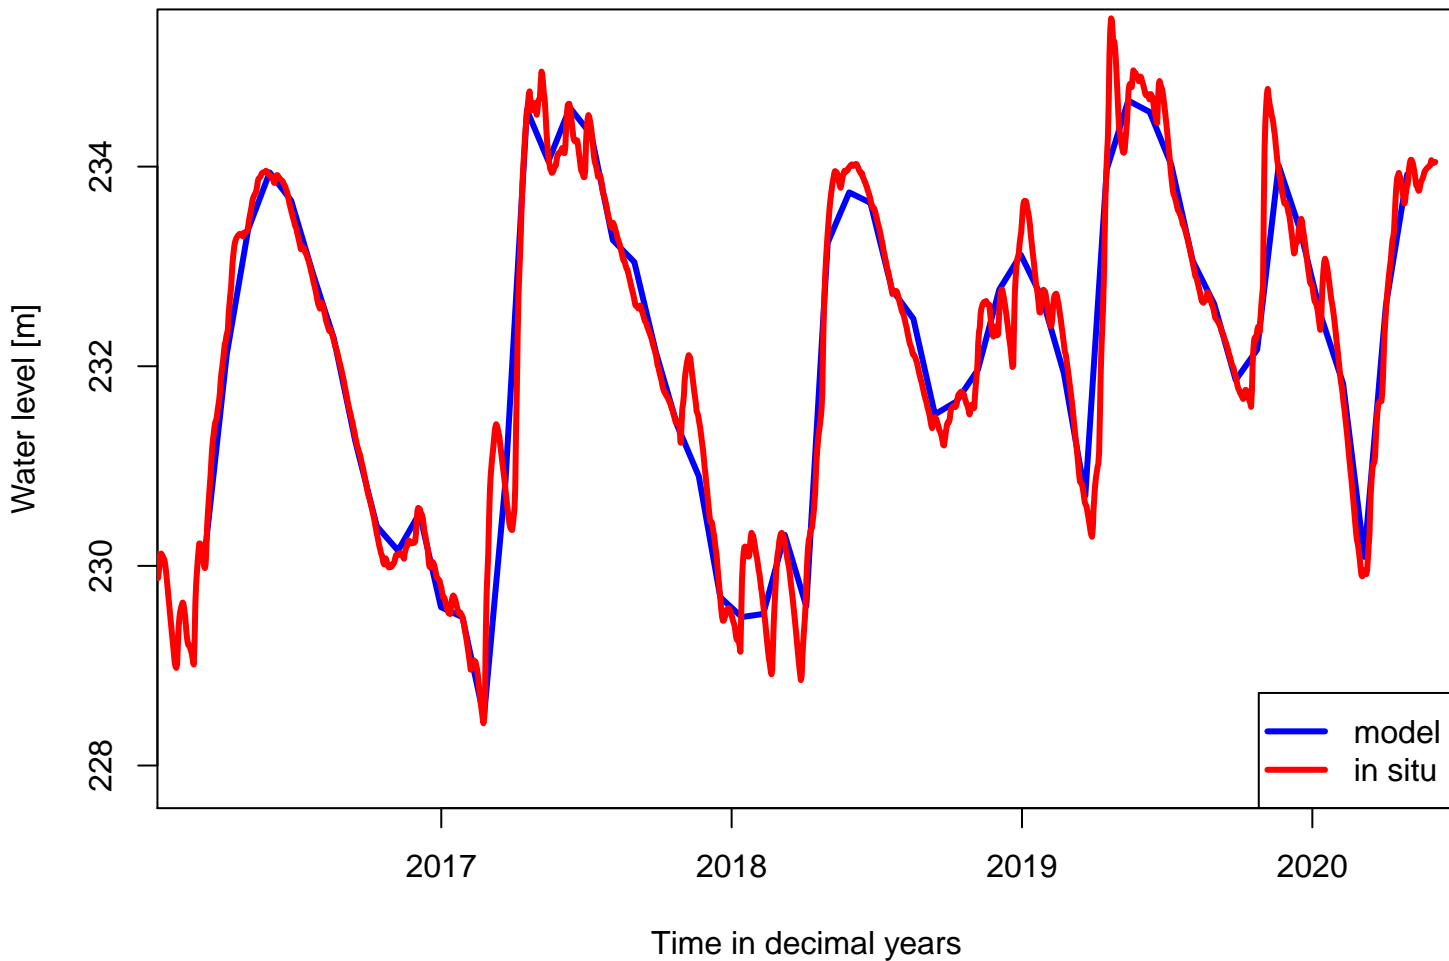

Supplement: s1 [file s1]

**lakename: Wollaston lakeid: 32 lat: 58.48 lon: -103.3**

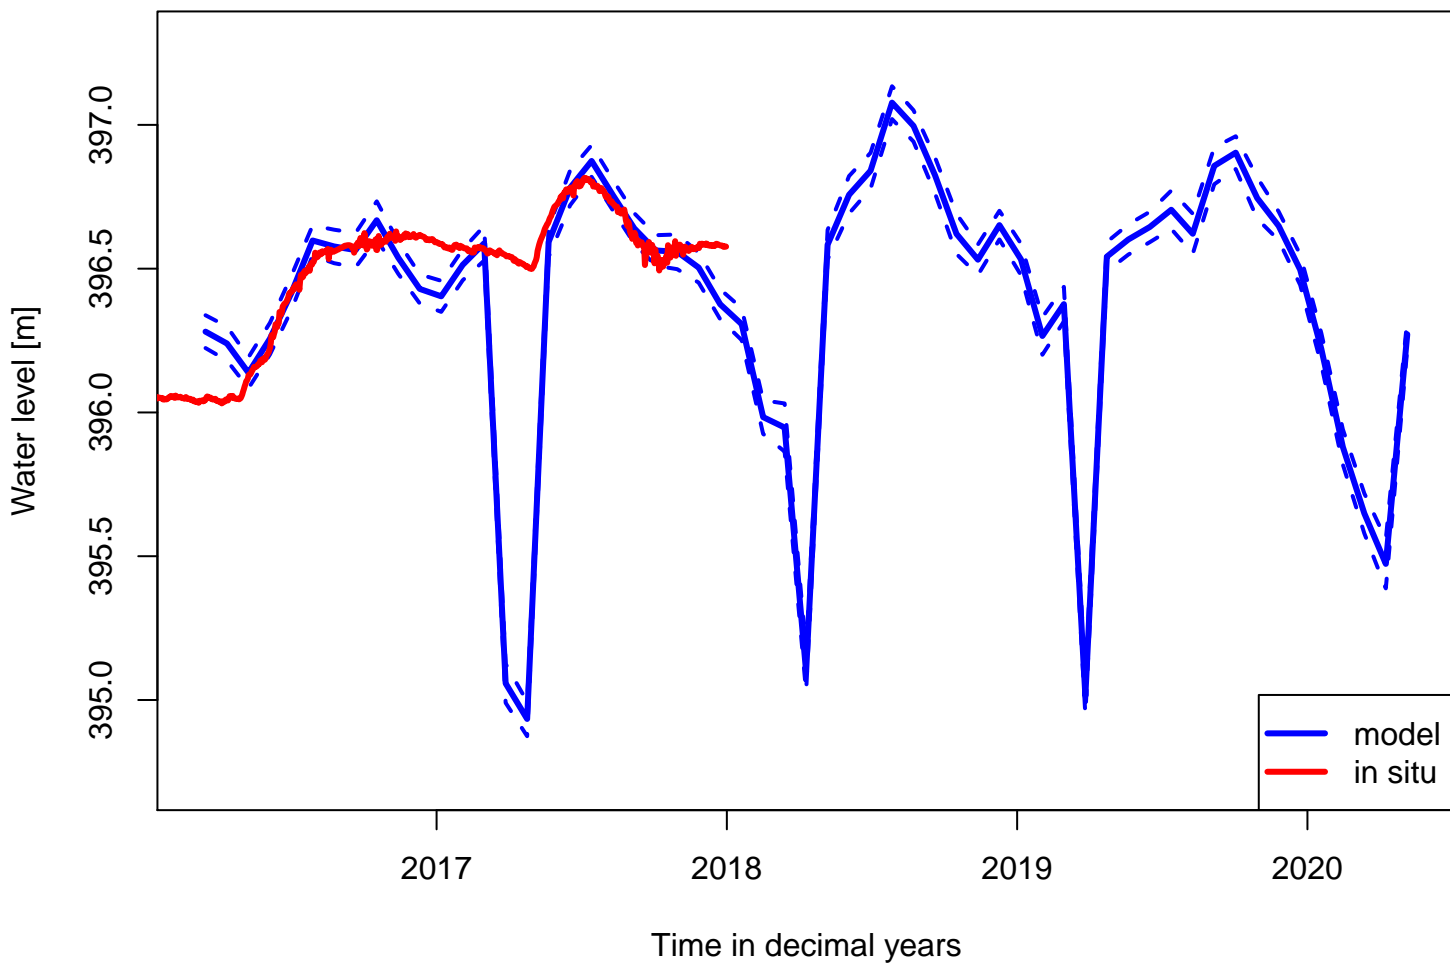

Supplement: s1 [file s1]

**lakename: St. Francis lakeid: 754 lat: 45.06 lon: -74.55**

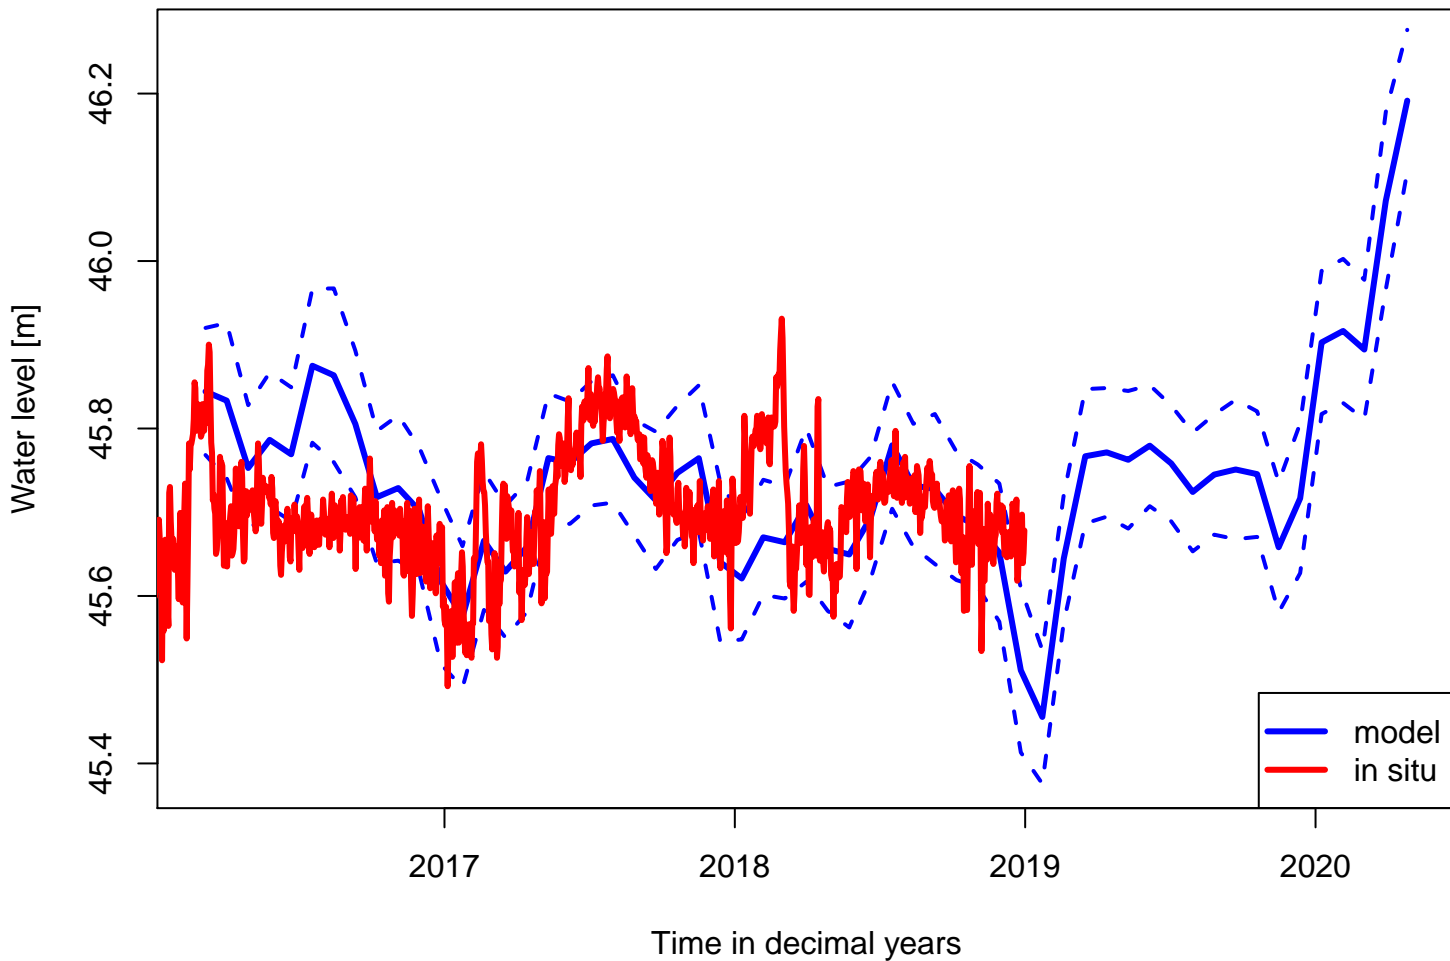

Supplement: s1 [file s1]

**lakename: lakeid: 691 lat: 49.62 lon: -95.21**

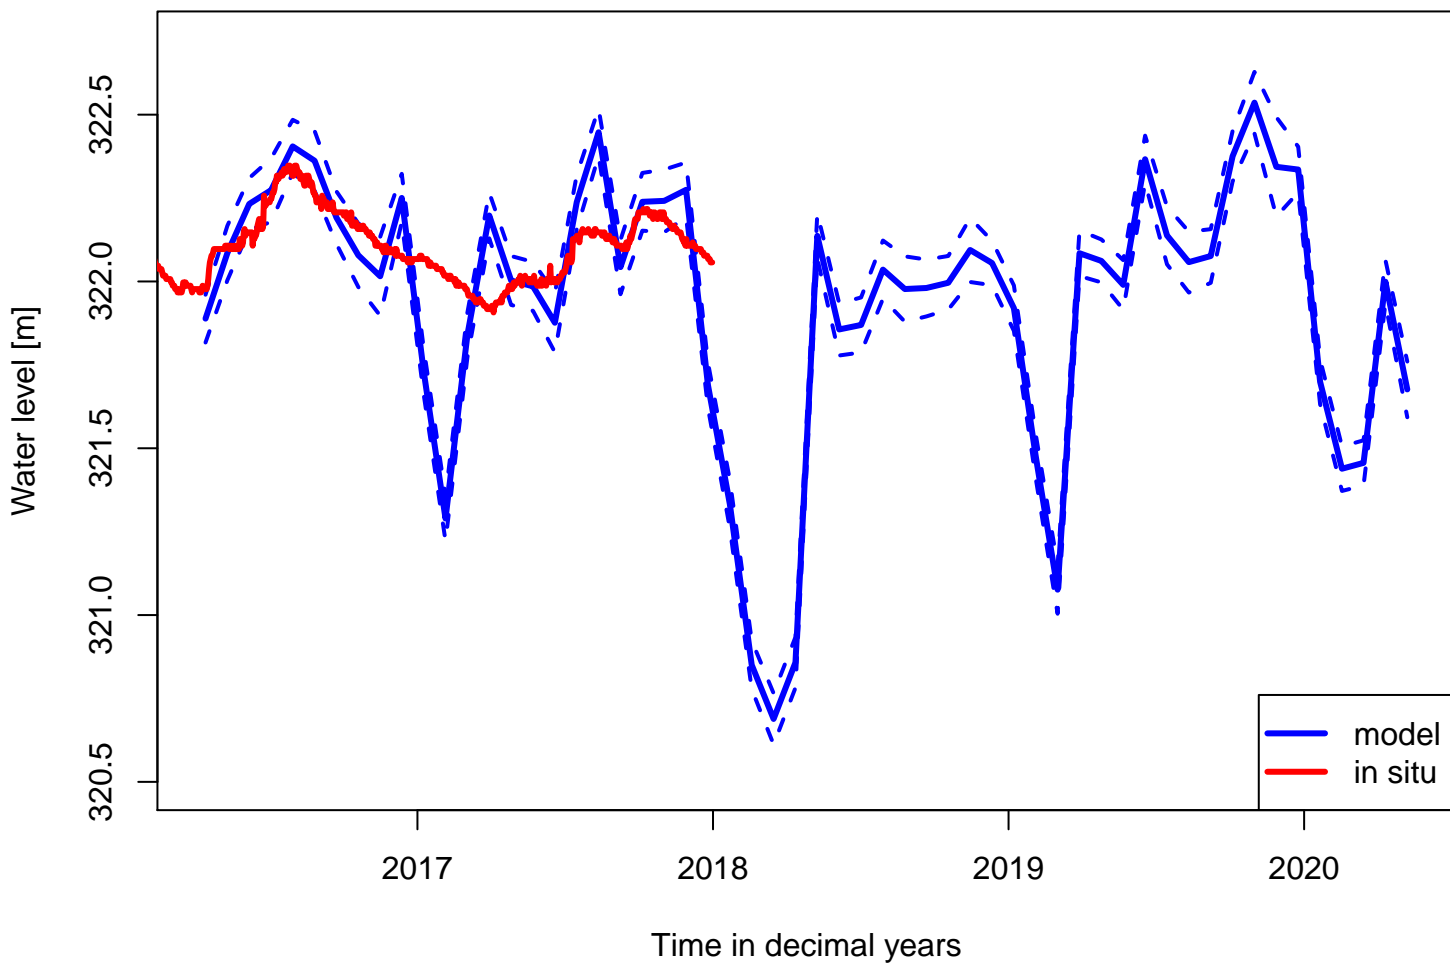

Supplement: s1 [file s1]

**lakename: Mullet Lake lakeid: 8819 lat: 45.58 lon: -84.49**

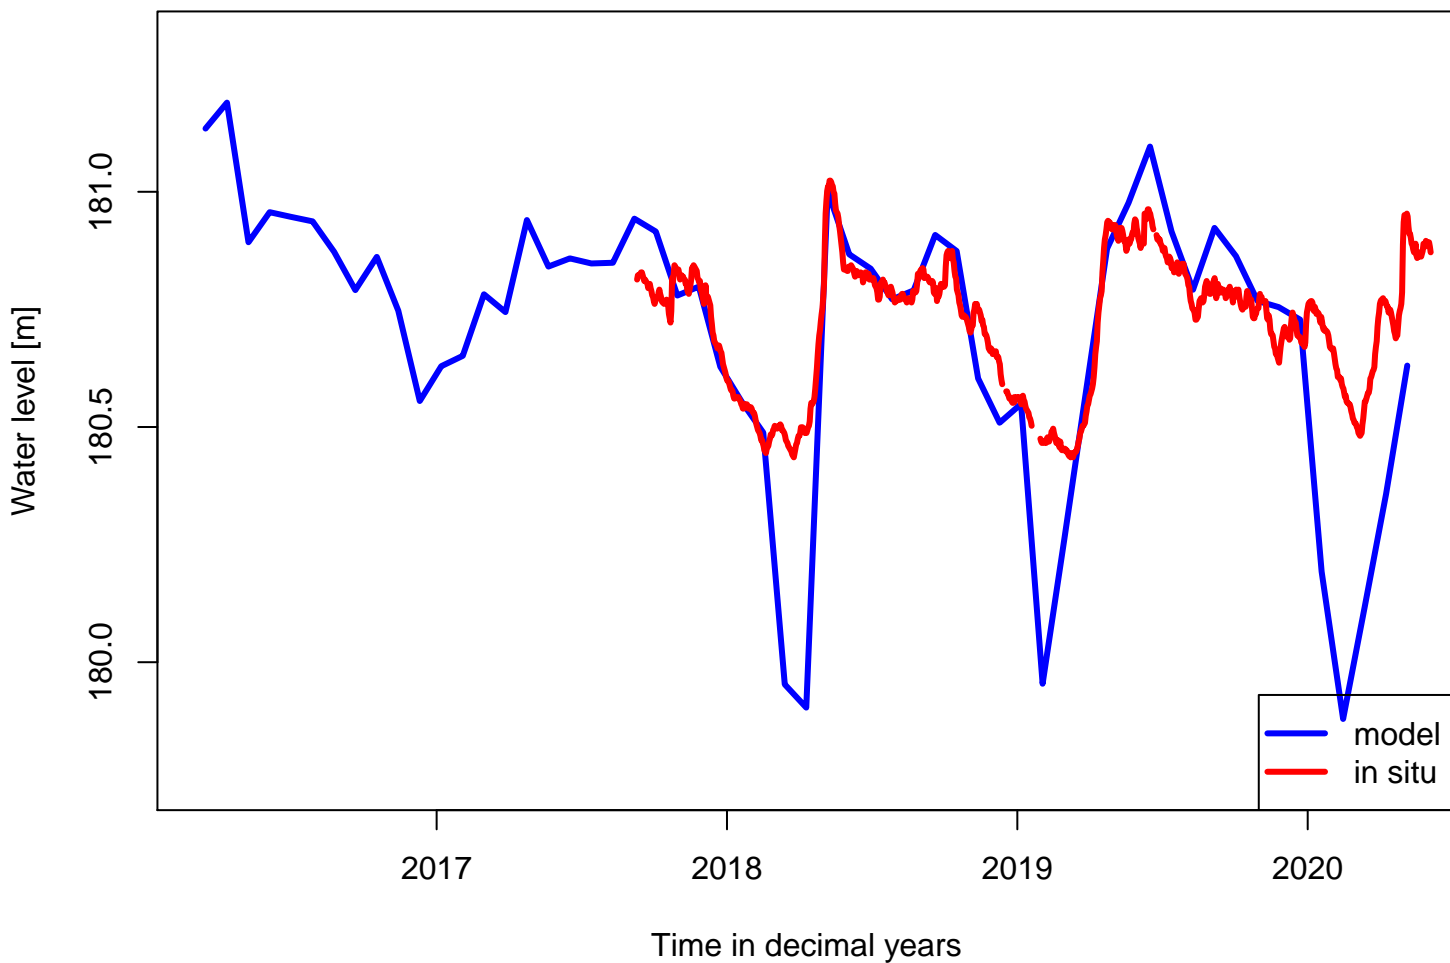

Supplement: s1 [file s1]

**lakename: Southern Indian lakeid: 37 lat: 56.78 lon: -99.53**

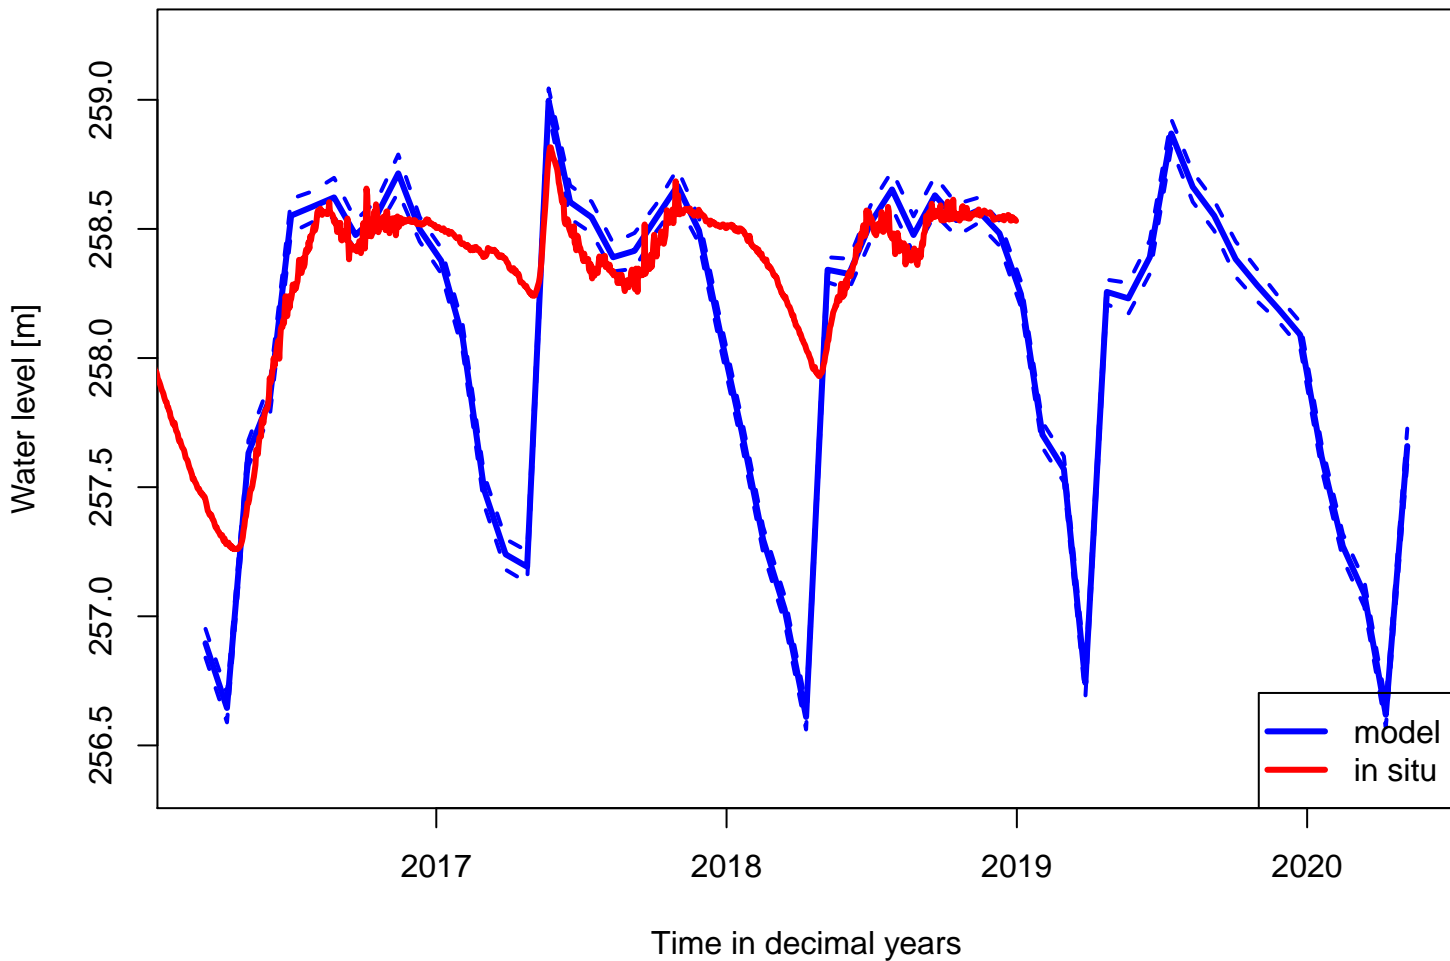

Supplement: s1 [file s1]

**lakename: Pontchartrain lakeid: 68 lat: 30.2 lon: -90.12**

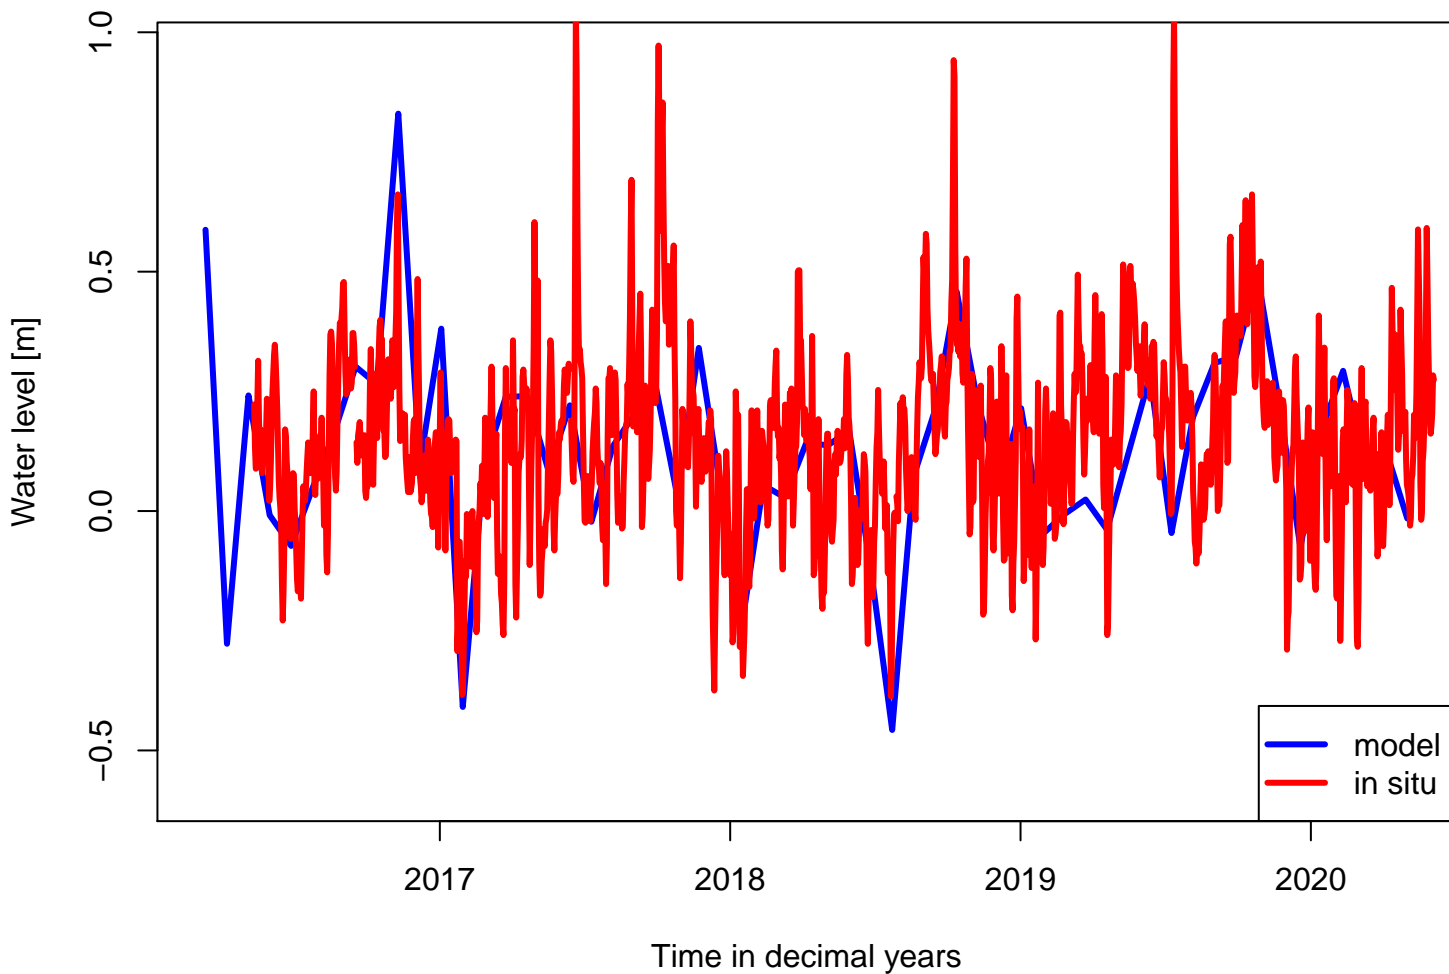

Supplement: s1 [file s1]

**lakename: Shuswap lakeid: 653 lat: 50.71 lon: -119.3**

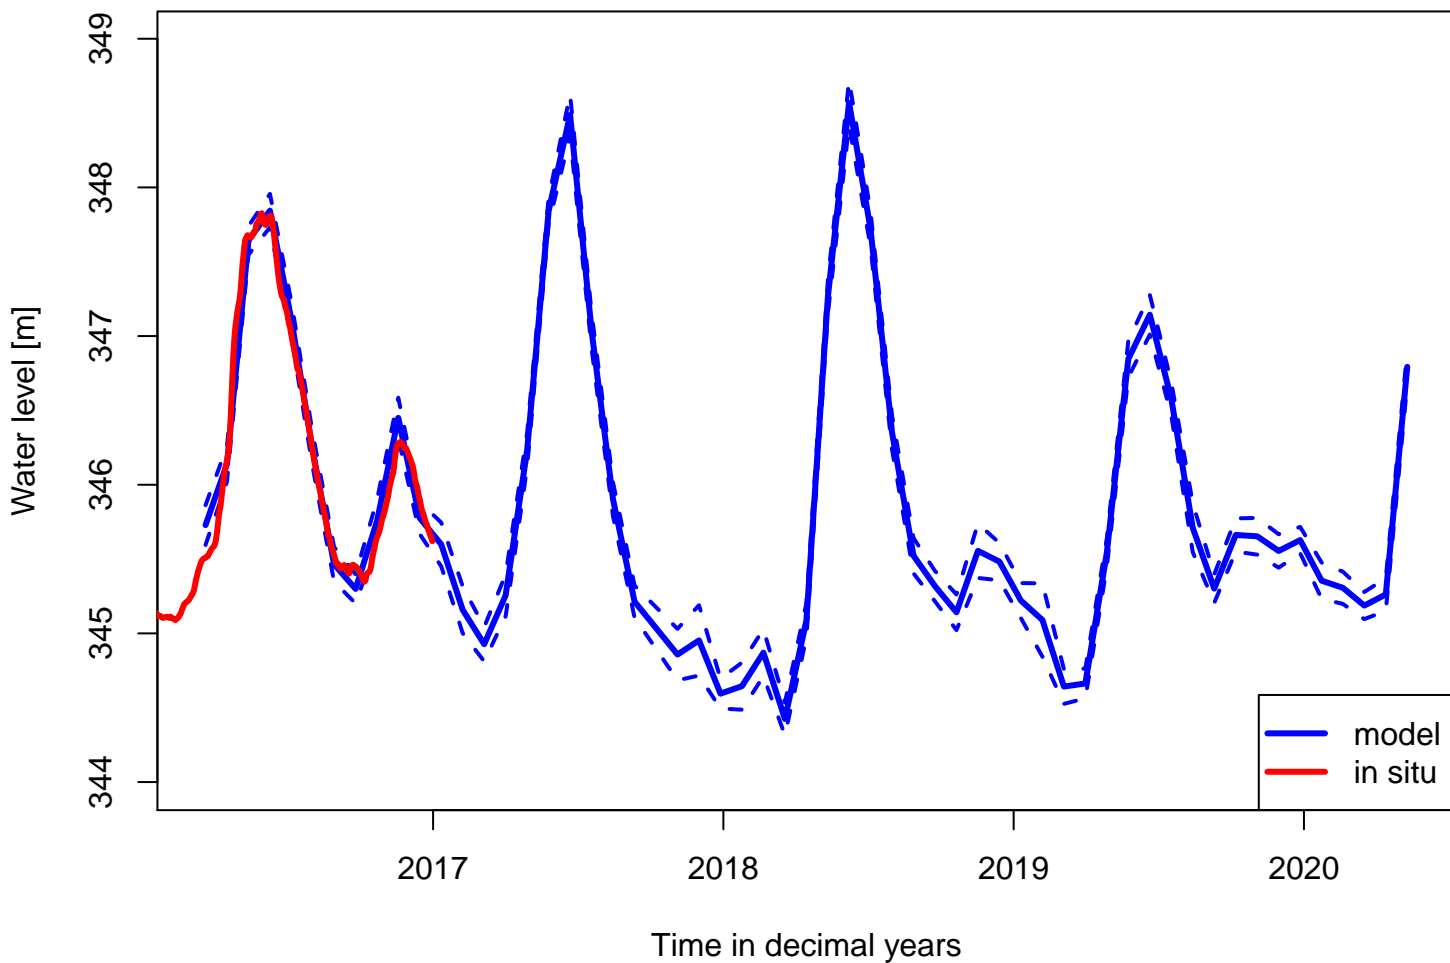

Supplement: s1 [file s1]

**lakename: Teslin lakeid: 394 lat: 60.16 lon: -132.7**

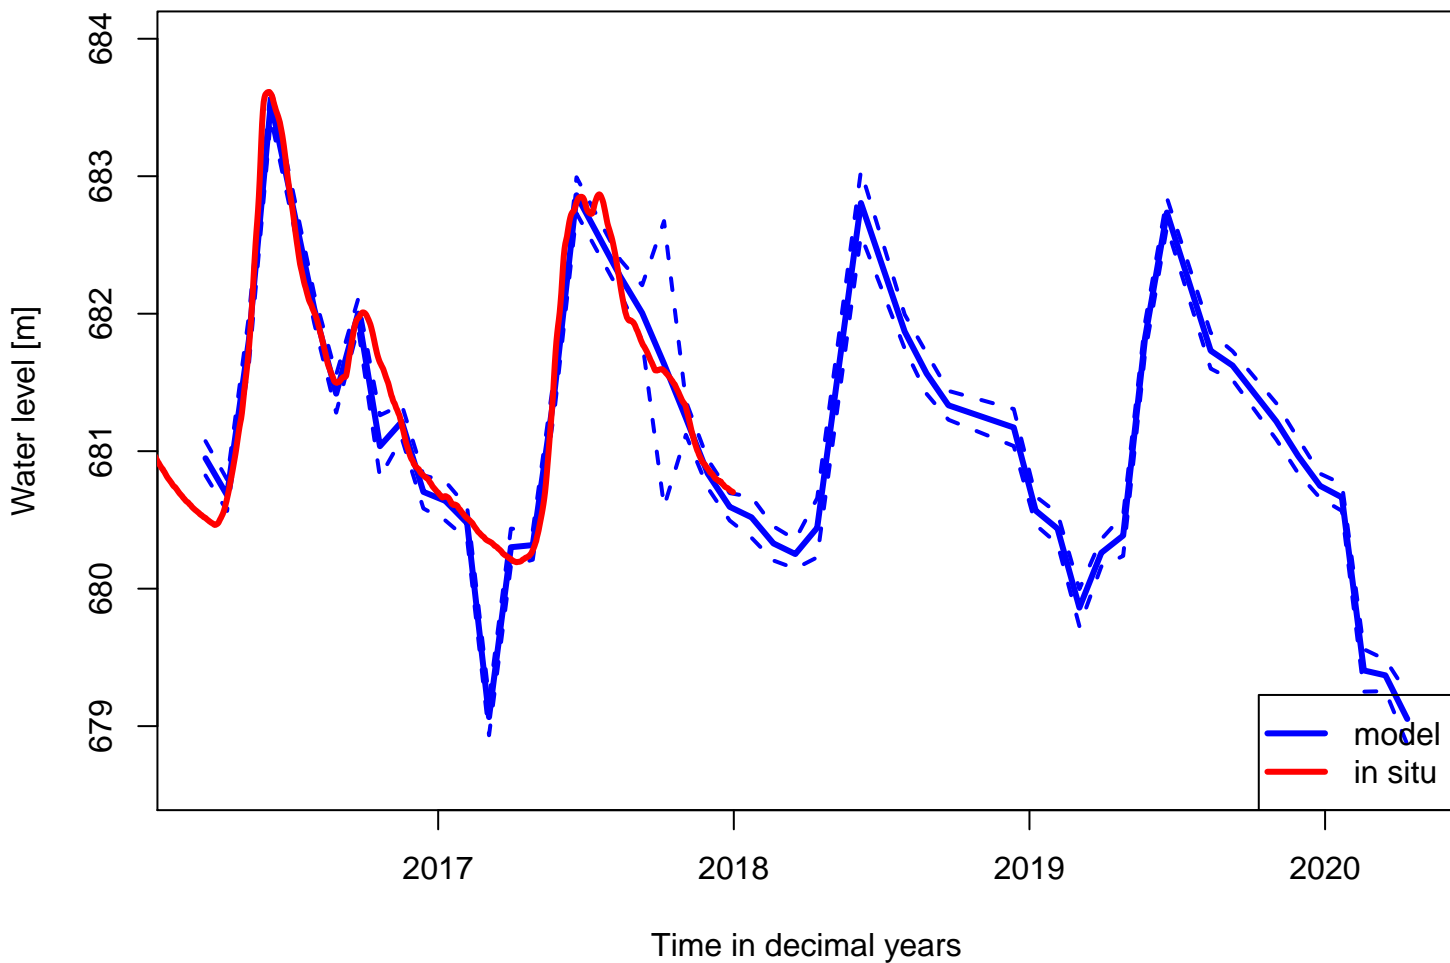

Supplement: s1 [file s1]

**lakename: Flathead Lake lakeid: 730 lat: 47.7 lon: -114.2**

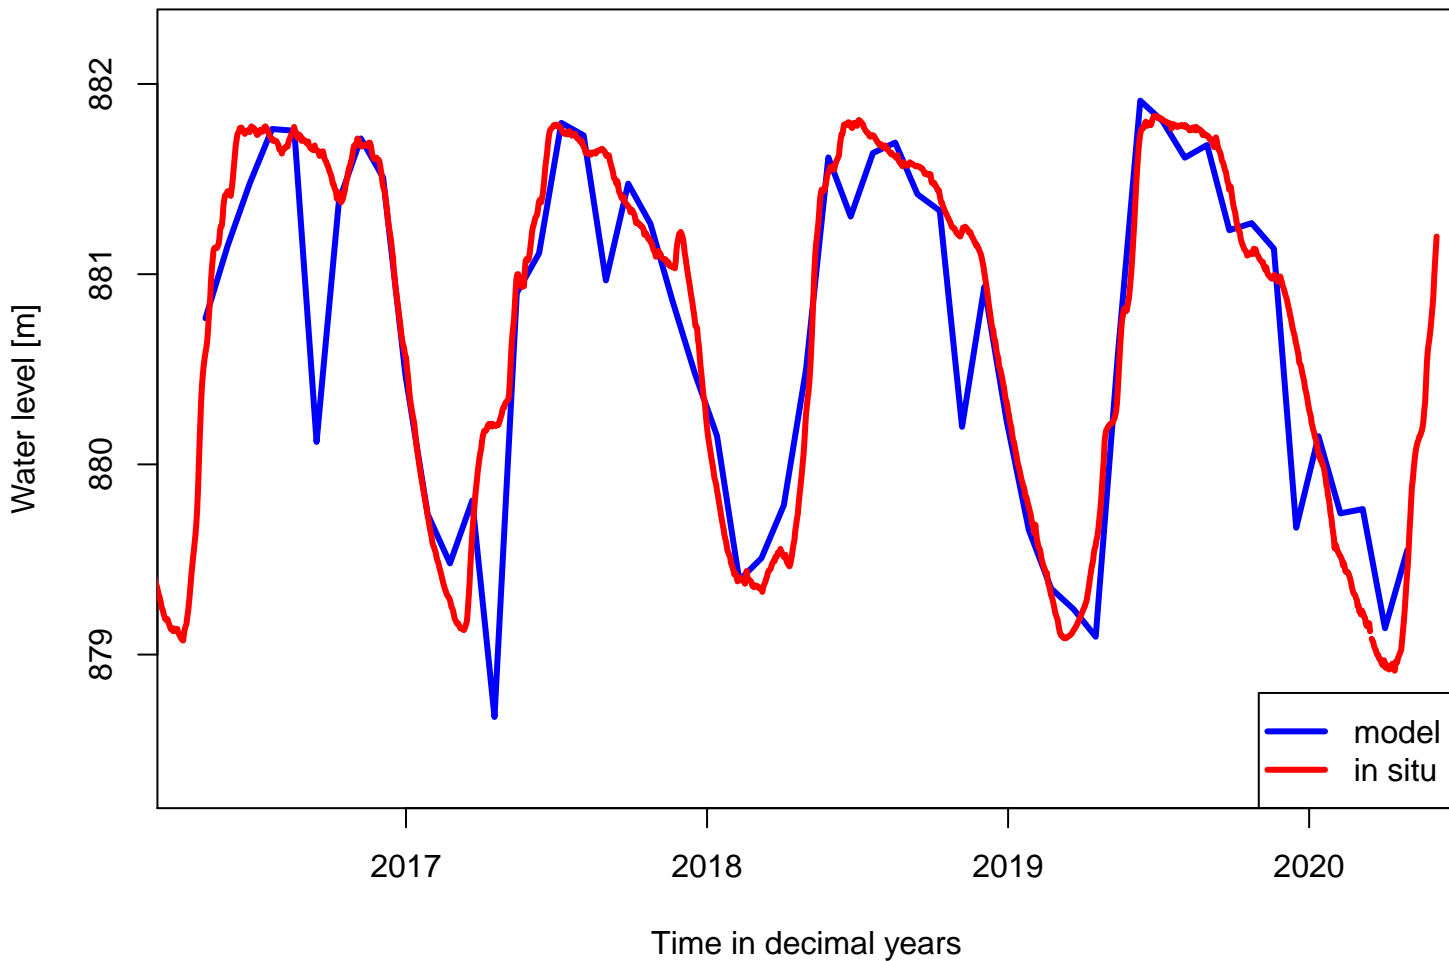

Supplement: s1 [file s1]

**lakename: Woods lakeid: 57 lat: 48.9 lon: -95.32**

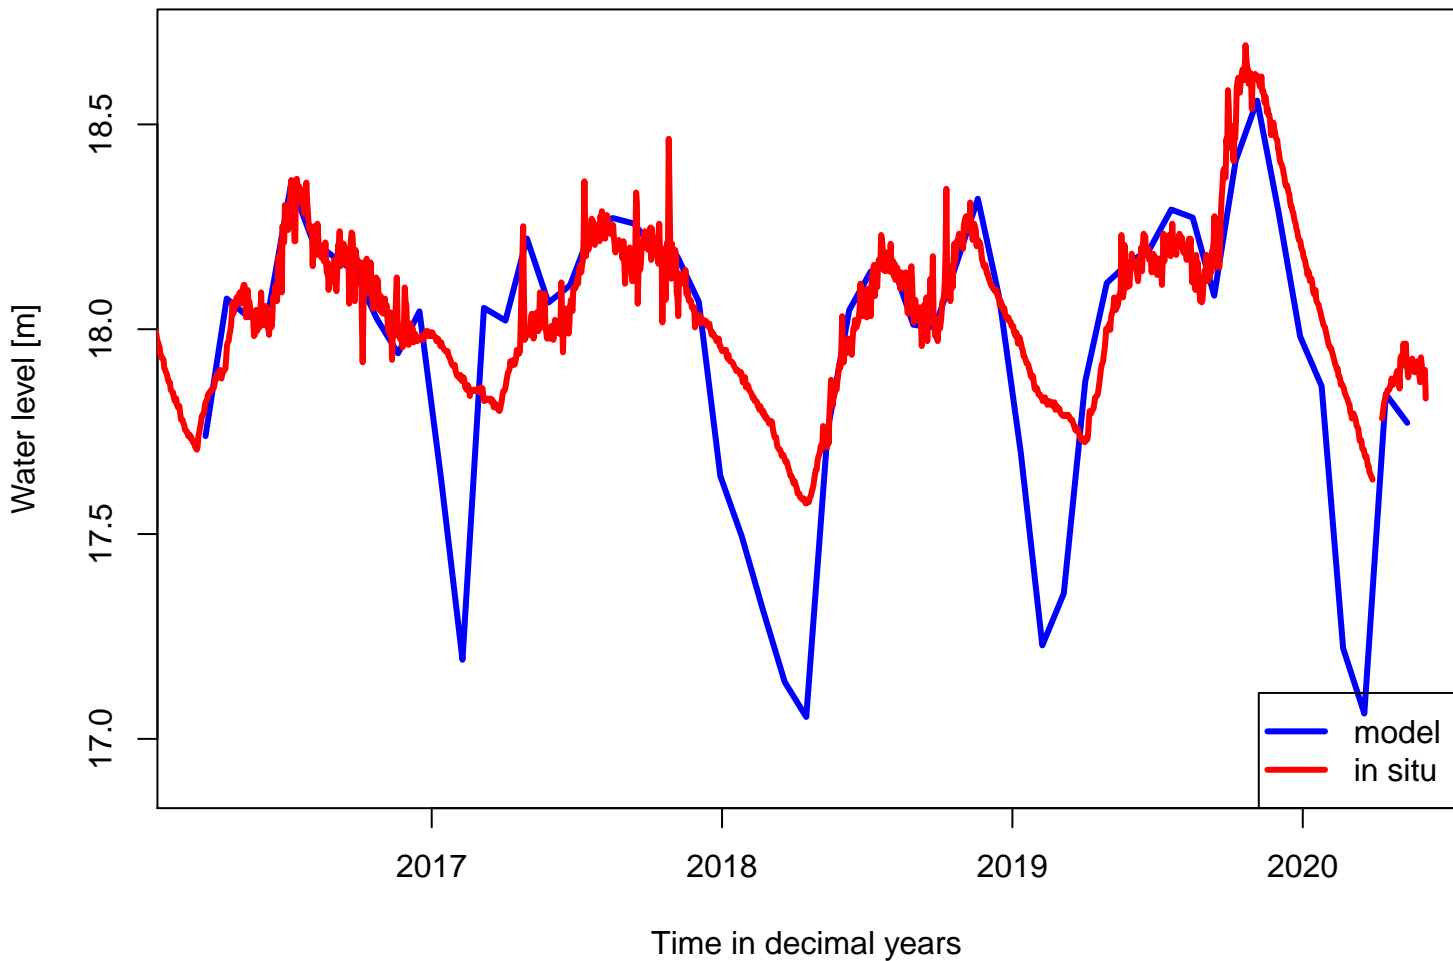

Supplement: s1 [file s1]

**lakename: Lewisville Lake lakeid: 9443 lat: 33.07 lon: -96.96**

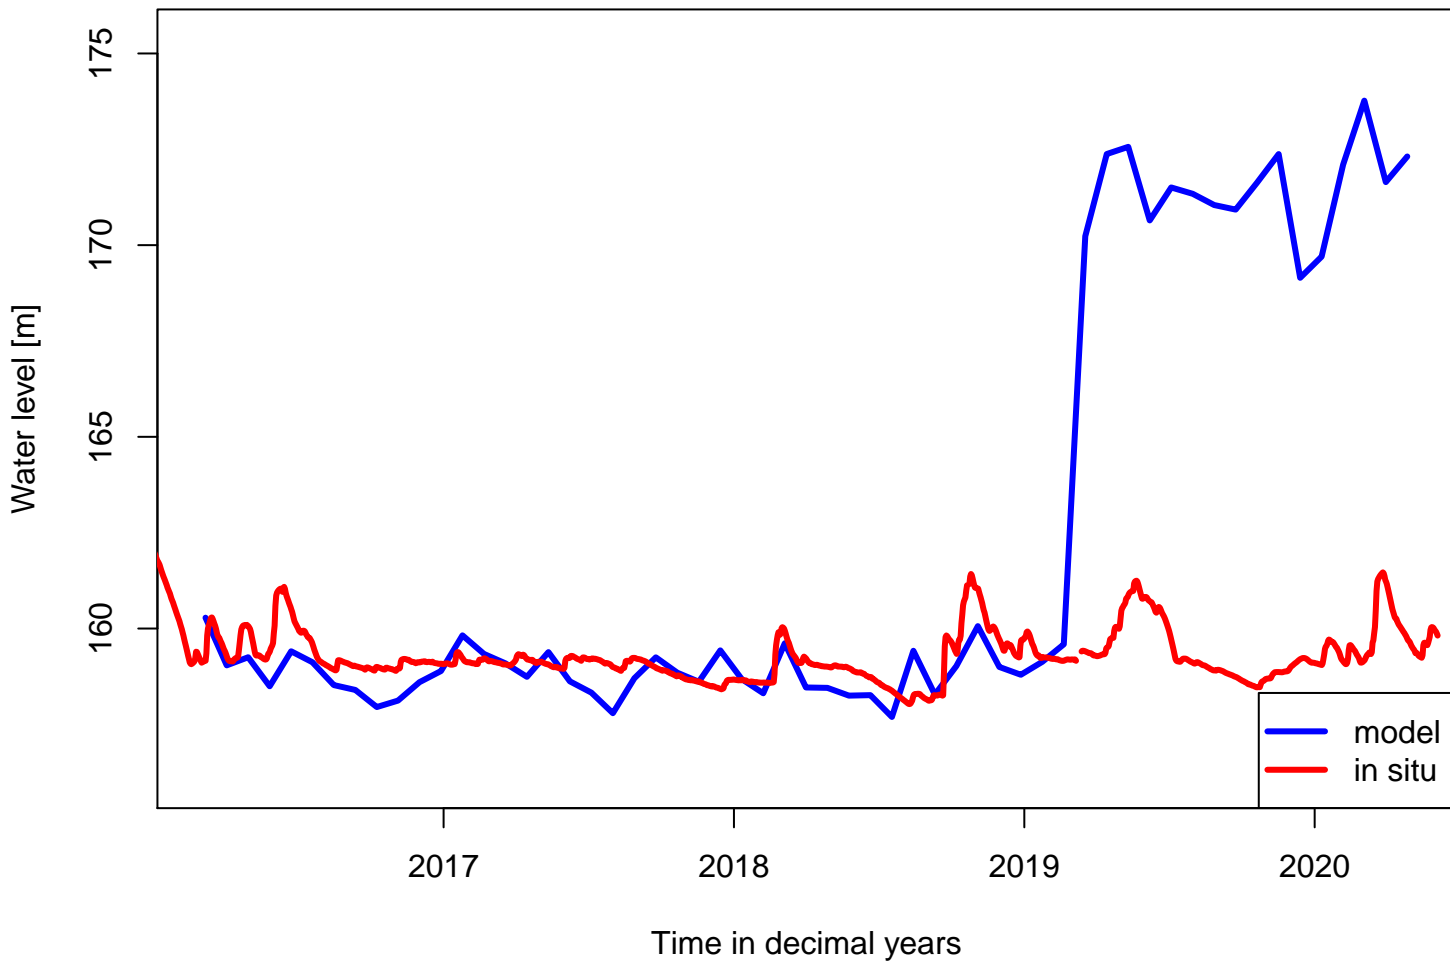

Supplement: s1 [file s1]

**lakename: Salton lakeid: 829 lat: 33.19 lon: -115.8**

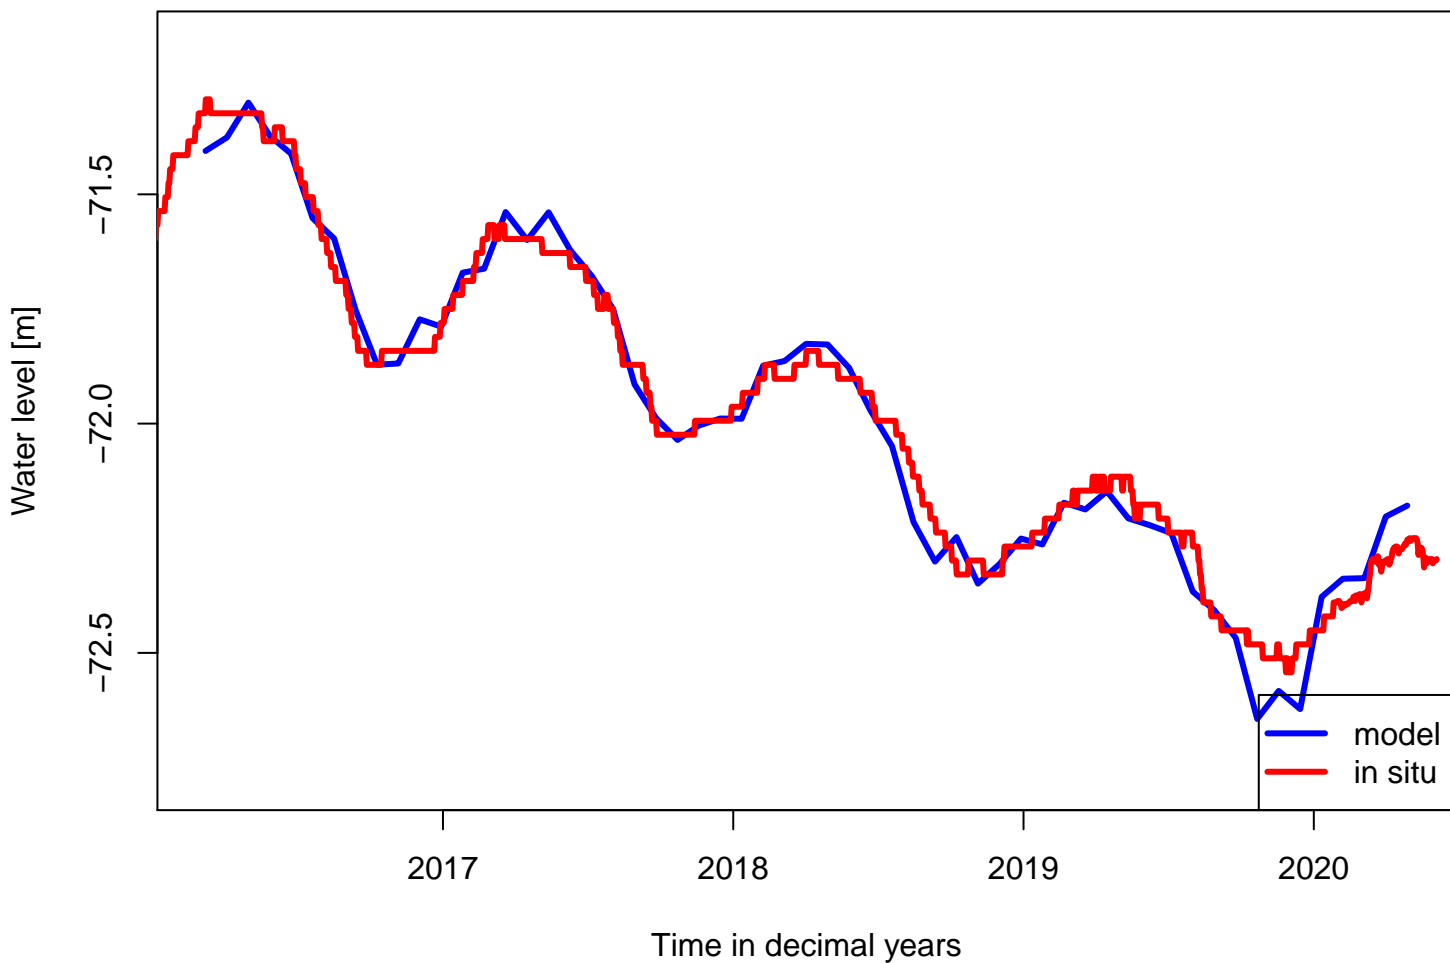

Supplement: s1 [file s1]

**lakename: Nechako Reservoir lakeid: 591 lat: 53.65 lon: -127.5**

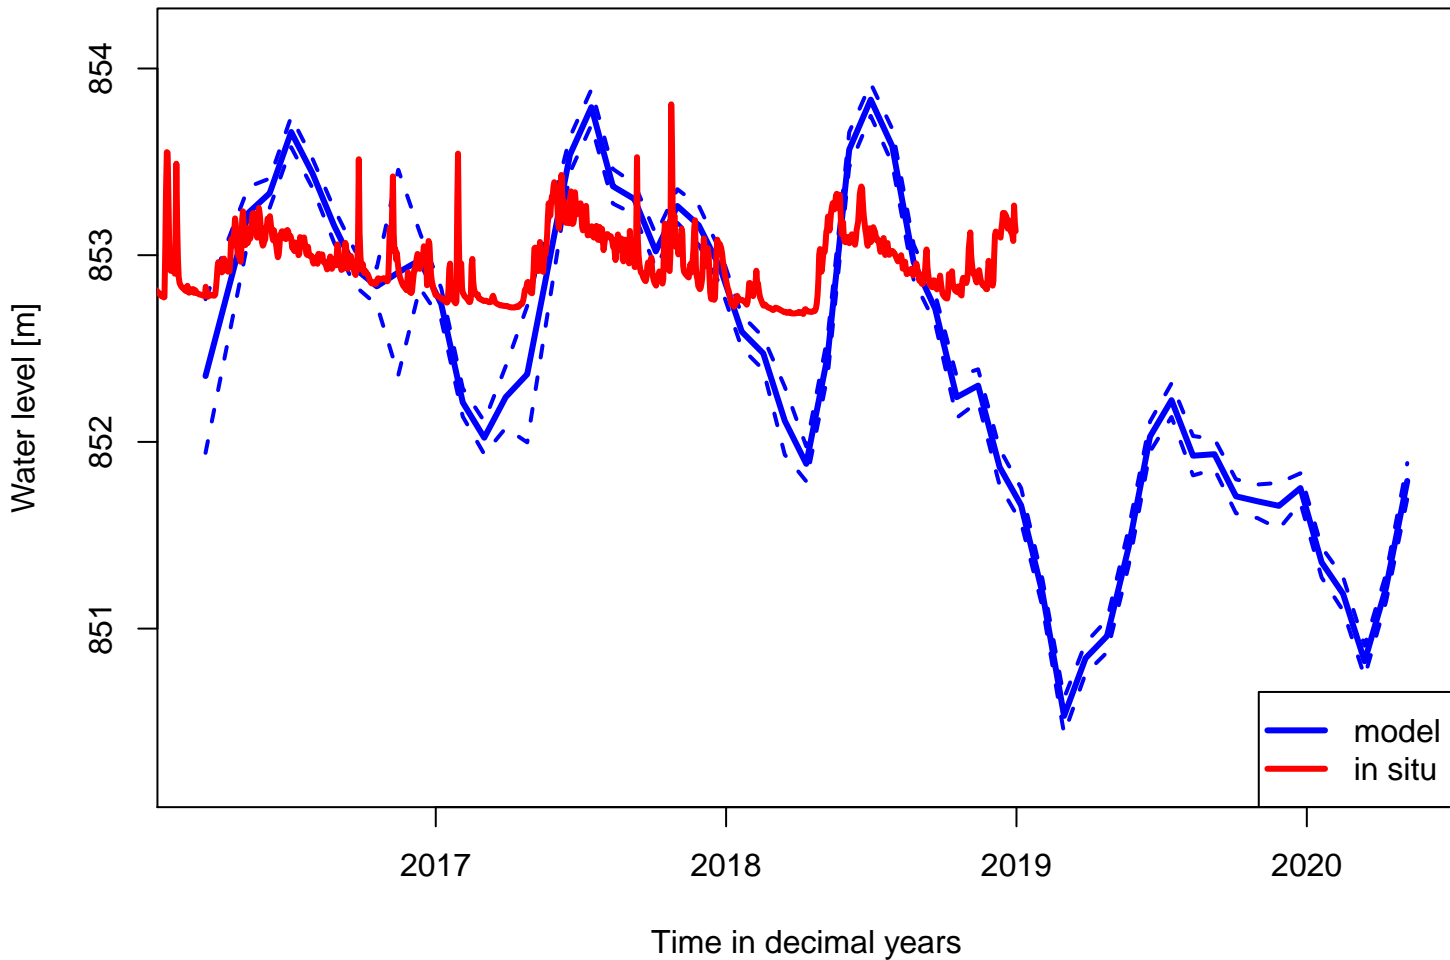

Supplement: s1 [file s1]

**lakename: Moose lakeid: 48 lat: 53.94 lon: -100.1**

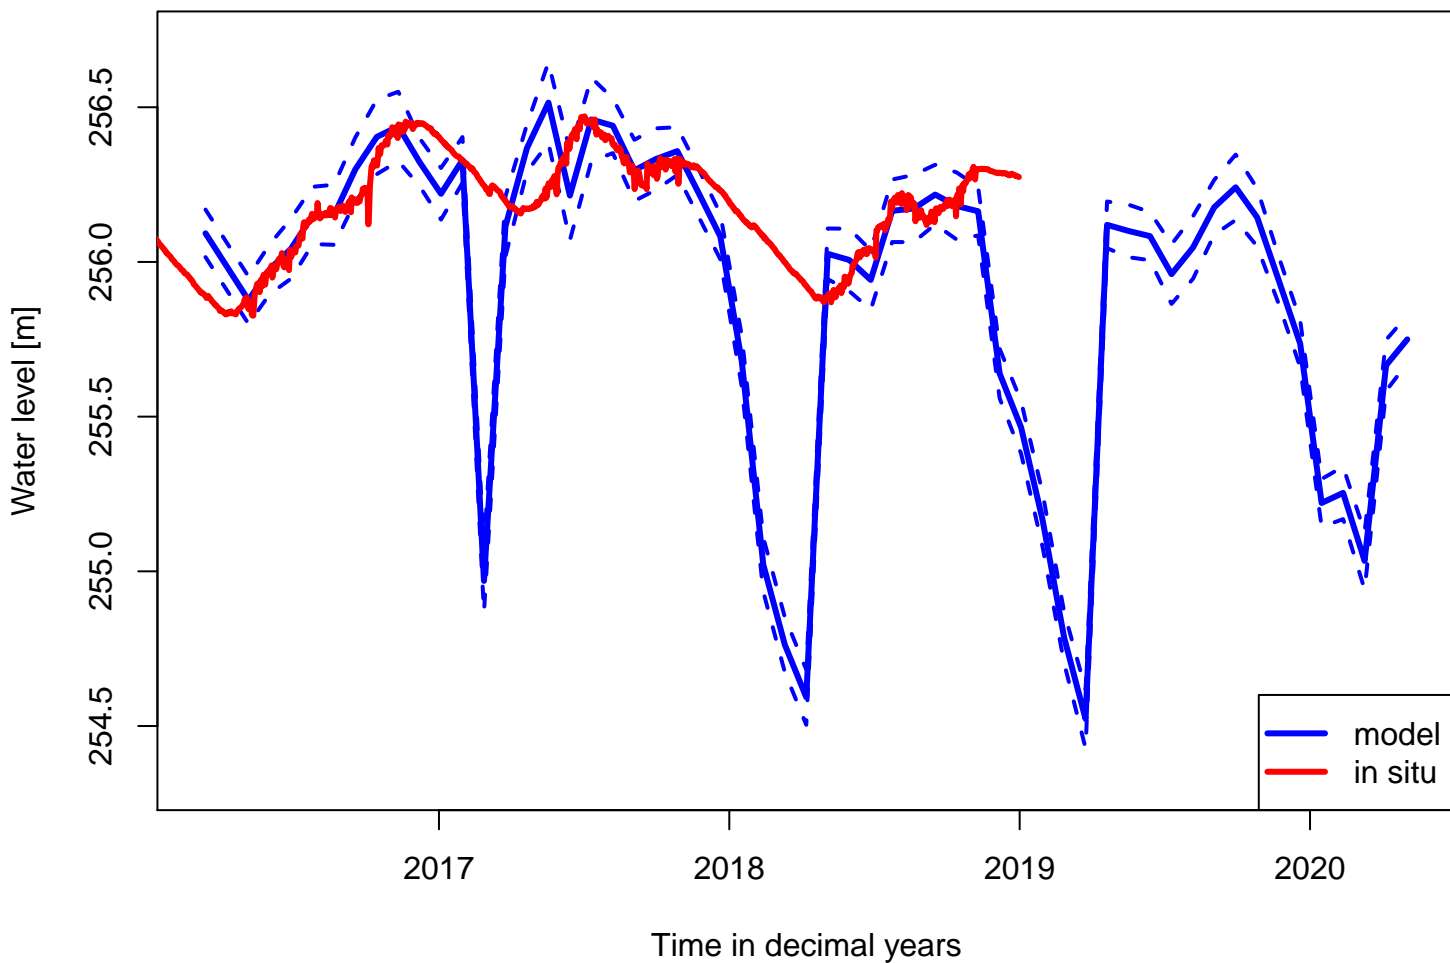

Supplement: s1 [file s1]

**lakename: Teslin lakeid: 394 lat: 60.16 lon: -132.7**

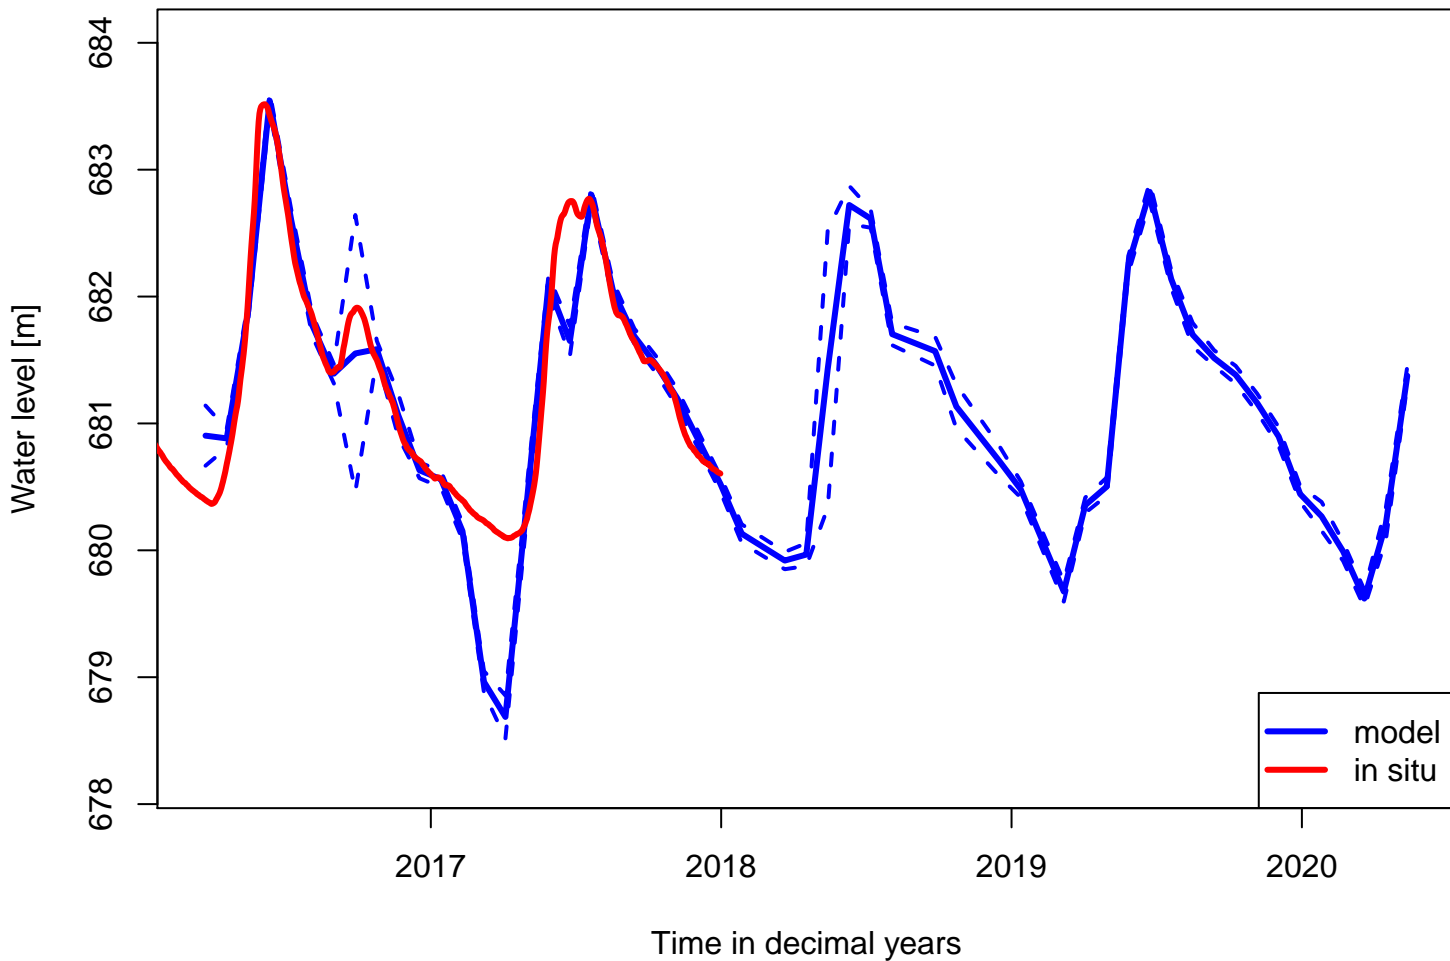

Supplement: s1 [file s1]

**lakename: Woods lakeid: 57 lat: 49.33 lon: -94.85**

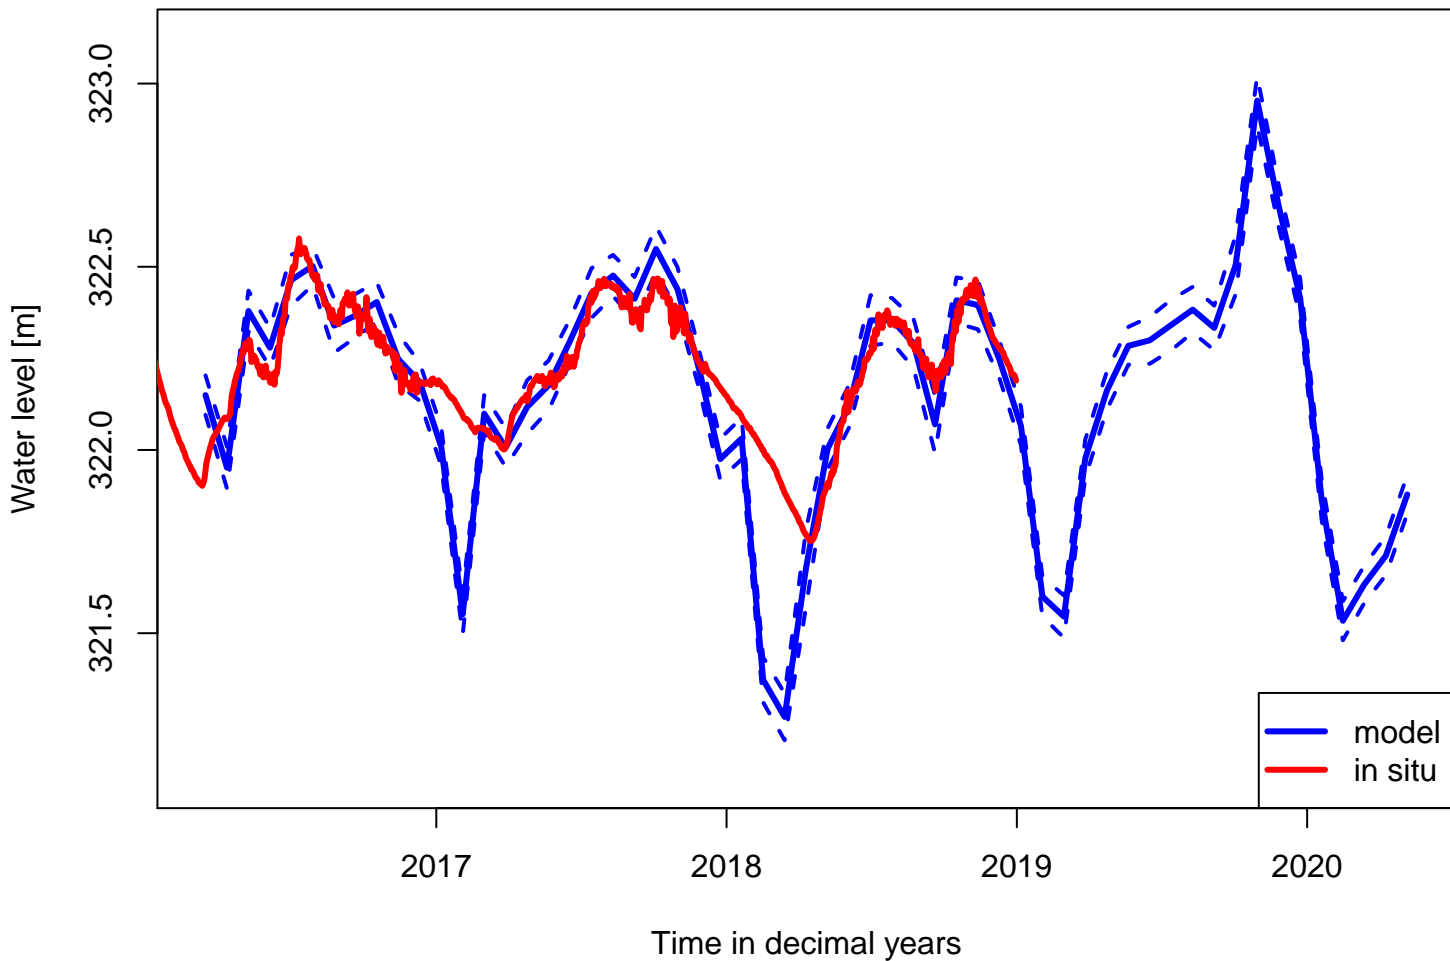

Supplement: s1 [file s1]

**lakename: Woods lakeid: 57 lat: 49.77 lon: -94.5**

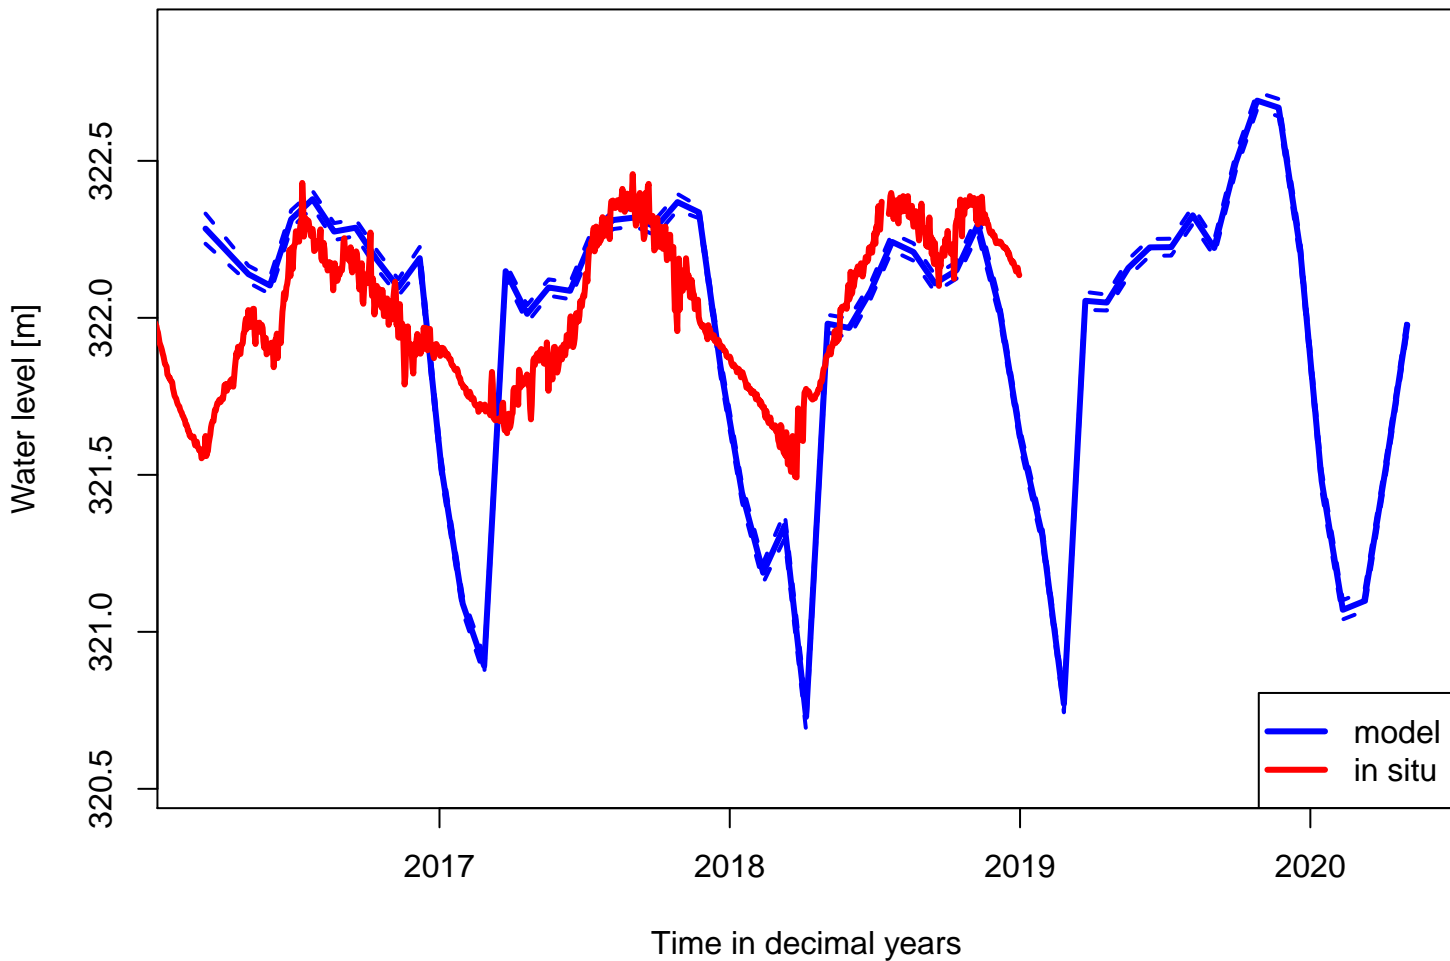

Supplement: s1 [file s1]

**lakename: Simcoe lakeid: 759 lat: 44.5 lon: -79.47**

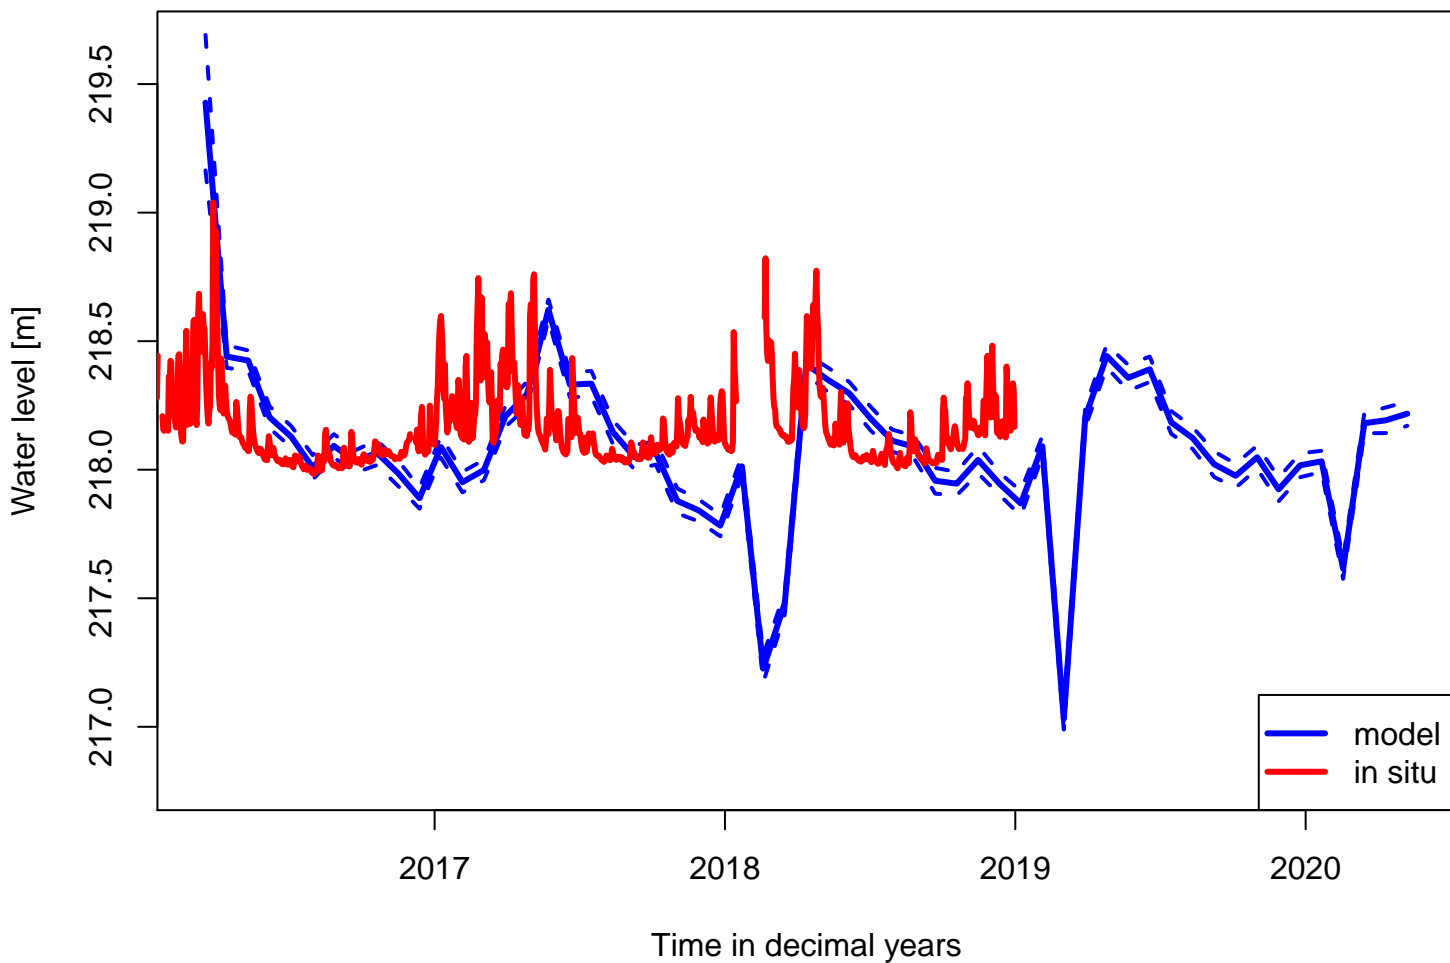

Supplement: s1 [file s1]

**lakename: Calcasieu Lake lakeid: 844 lat: 30.03 lon: -93.3**

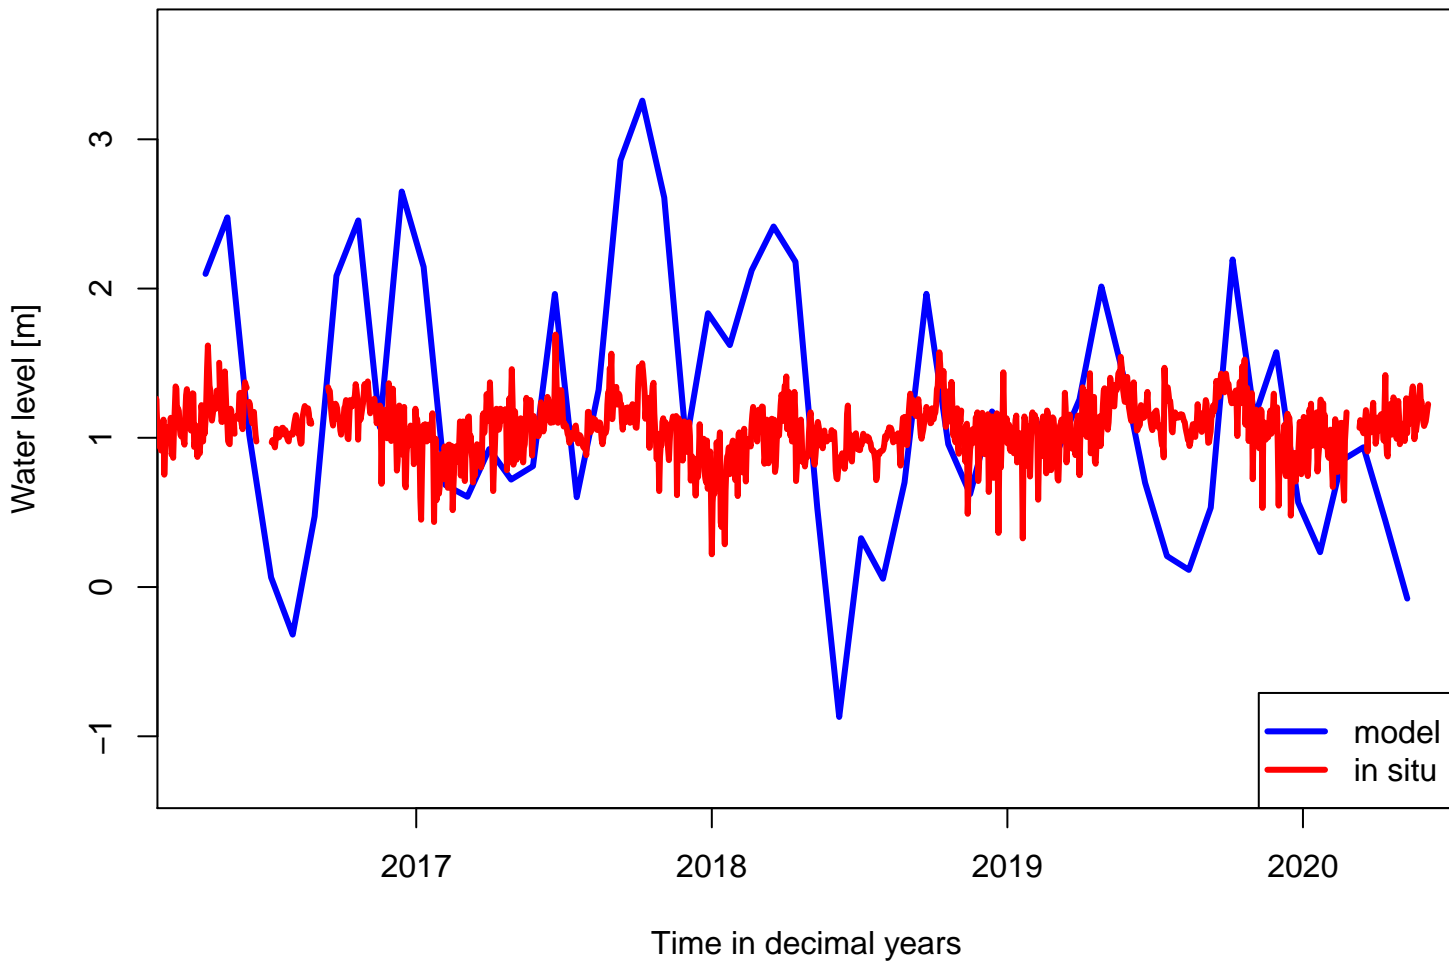

Supplement: s1 [file s1]

**lakename: Contwoyto lakeid: 22 lat: 65.78 lon: -111.2**

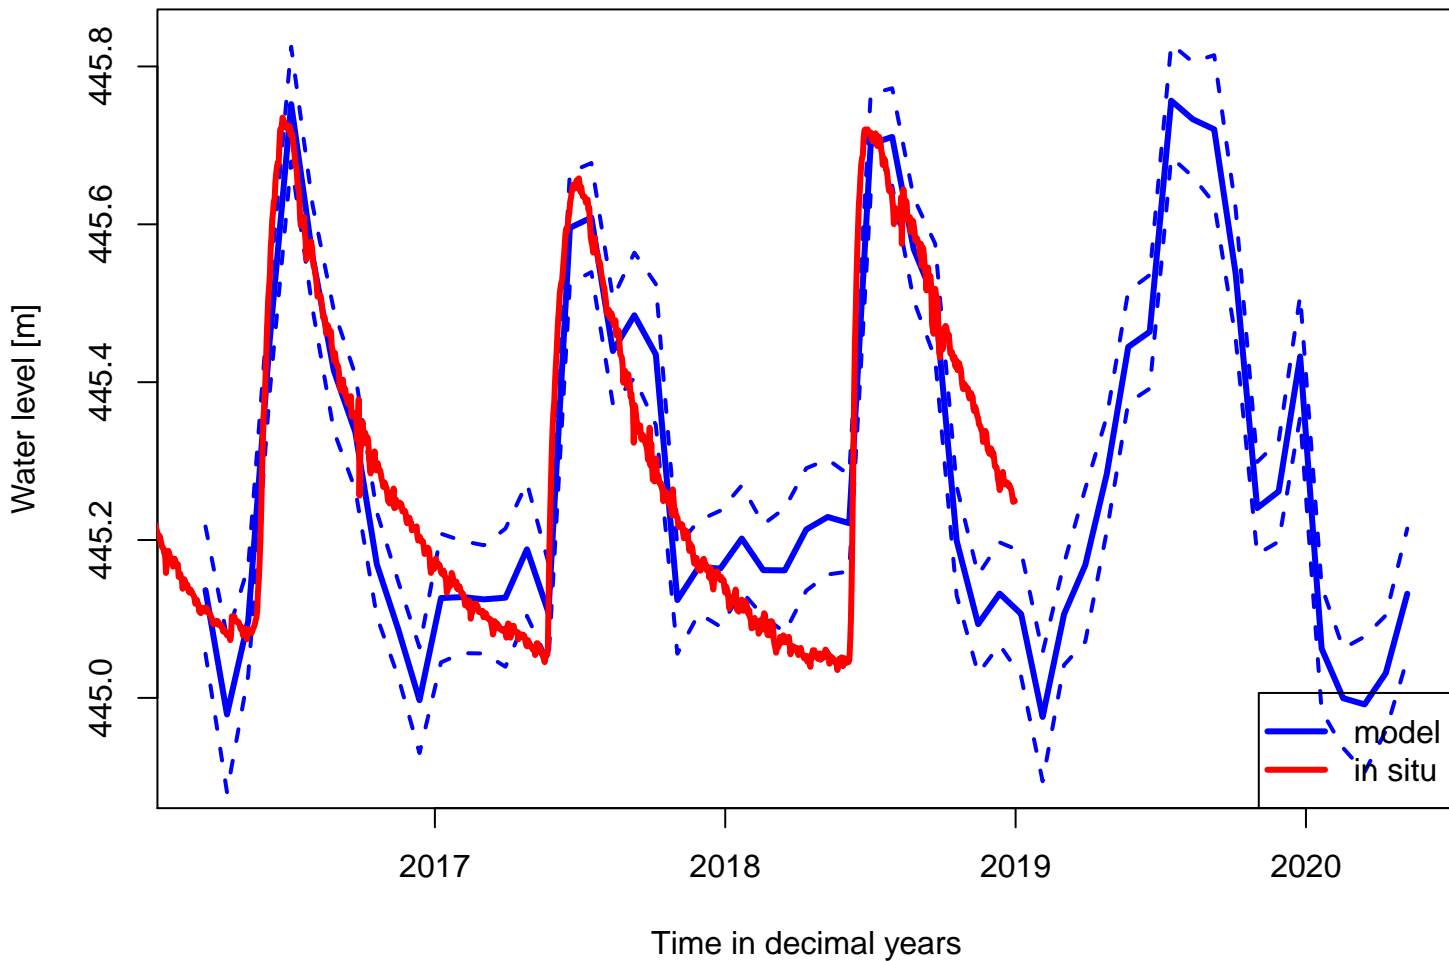

Supplement: s1 [file s1]

**lakename: Joseph lakeid: 756 lat: 45.12 lon: -79.58**

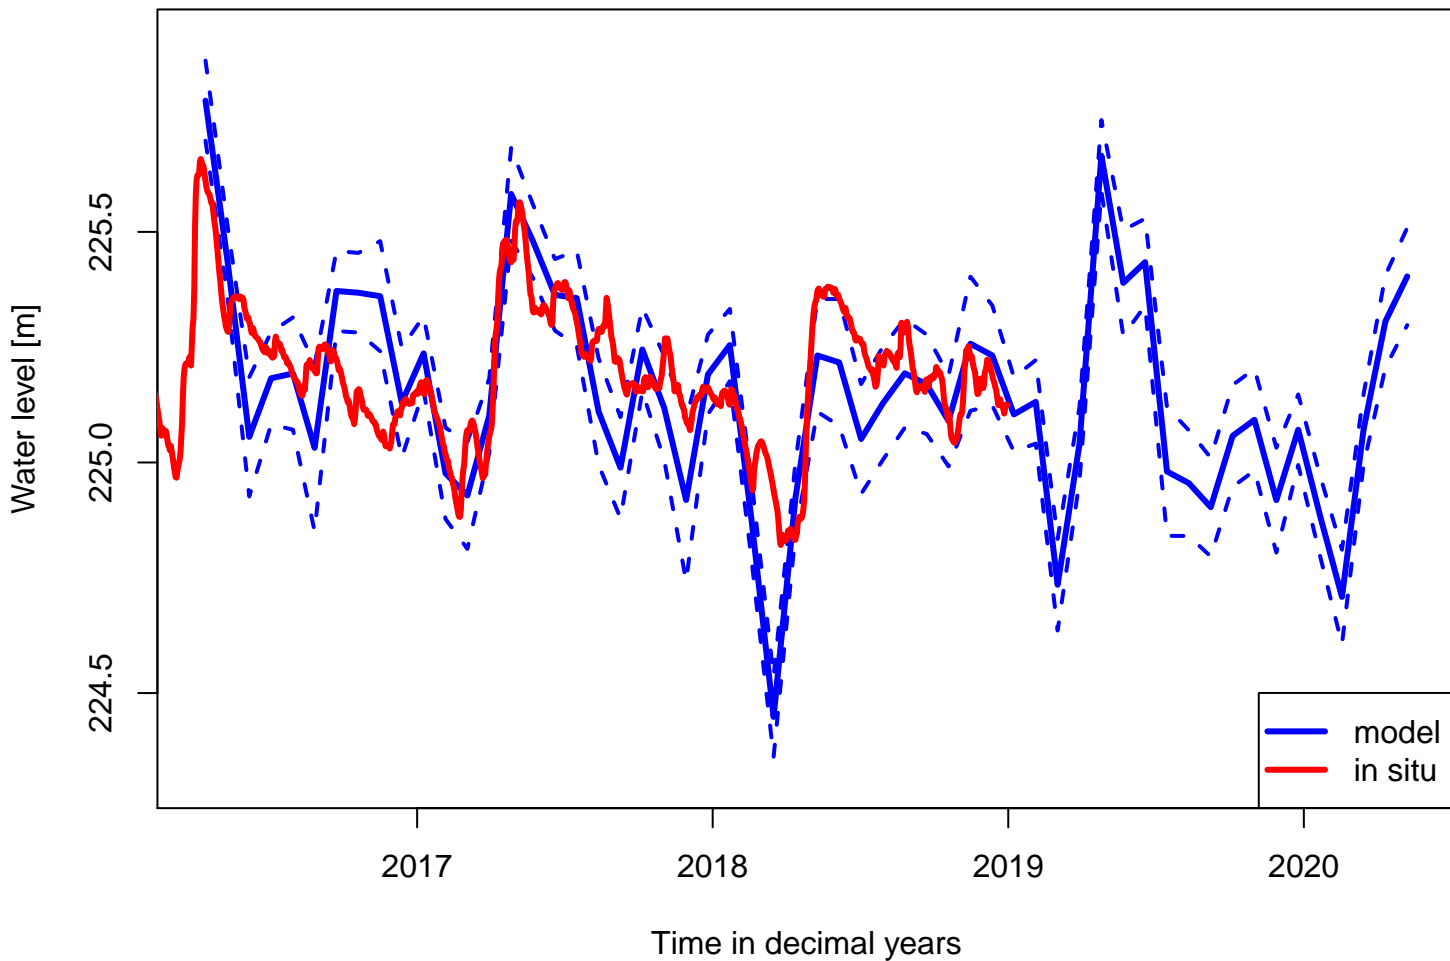

Supplement: s1 [file s1]

**lakename: Kluane lakeid: 363 lat: 61.05 lon: -138.5**

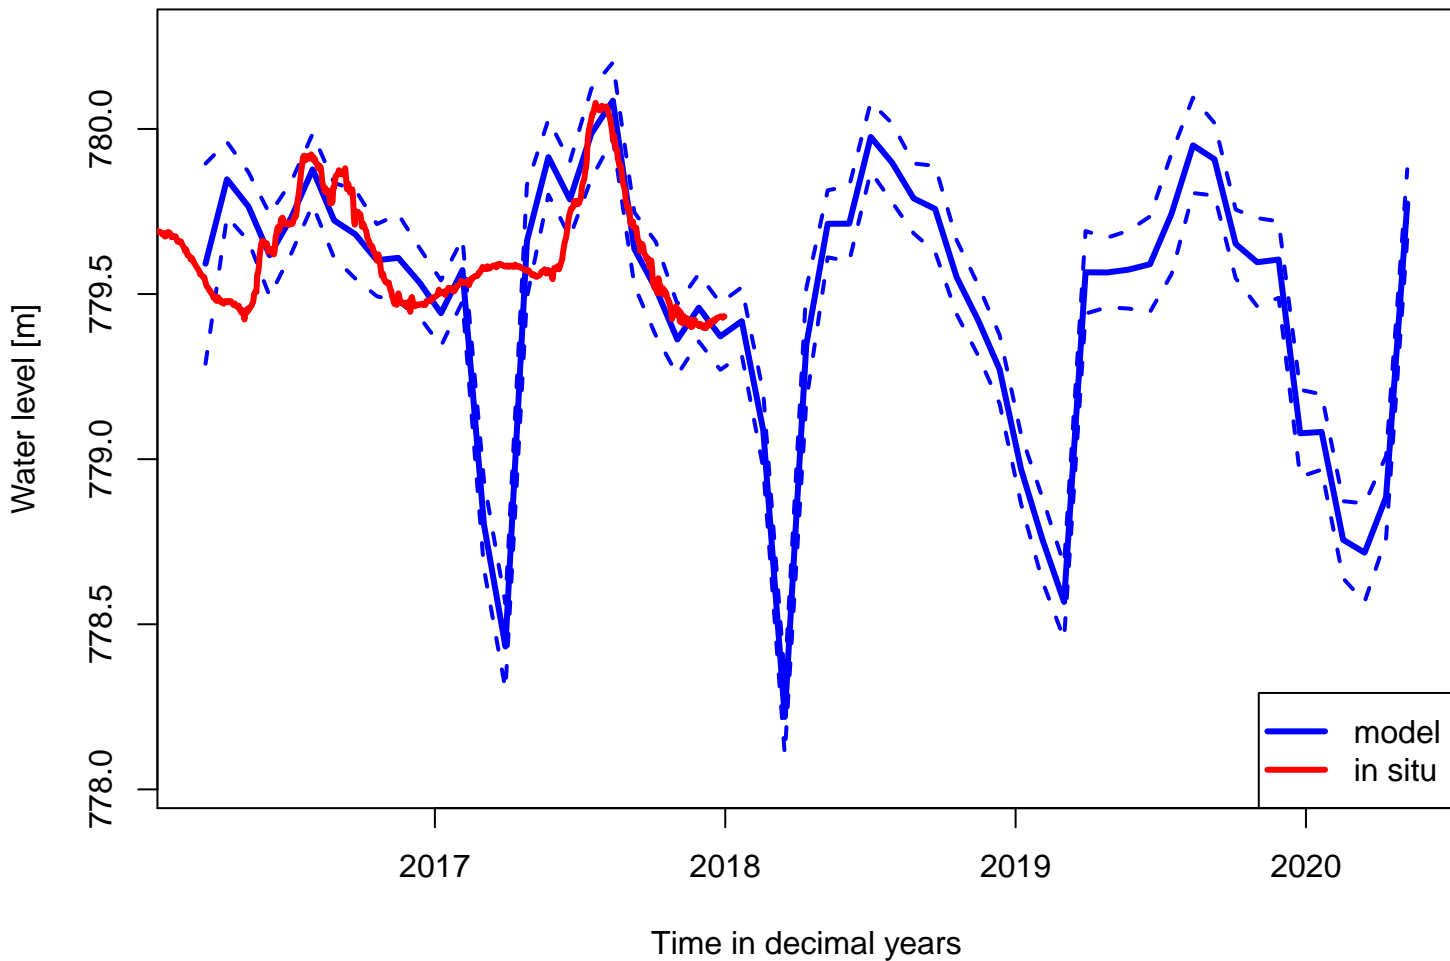

Supplement: s1 [file s1]

**lakename: Southern Indian lakeid: 37 lat: 56.69 lon: -99.02**

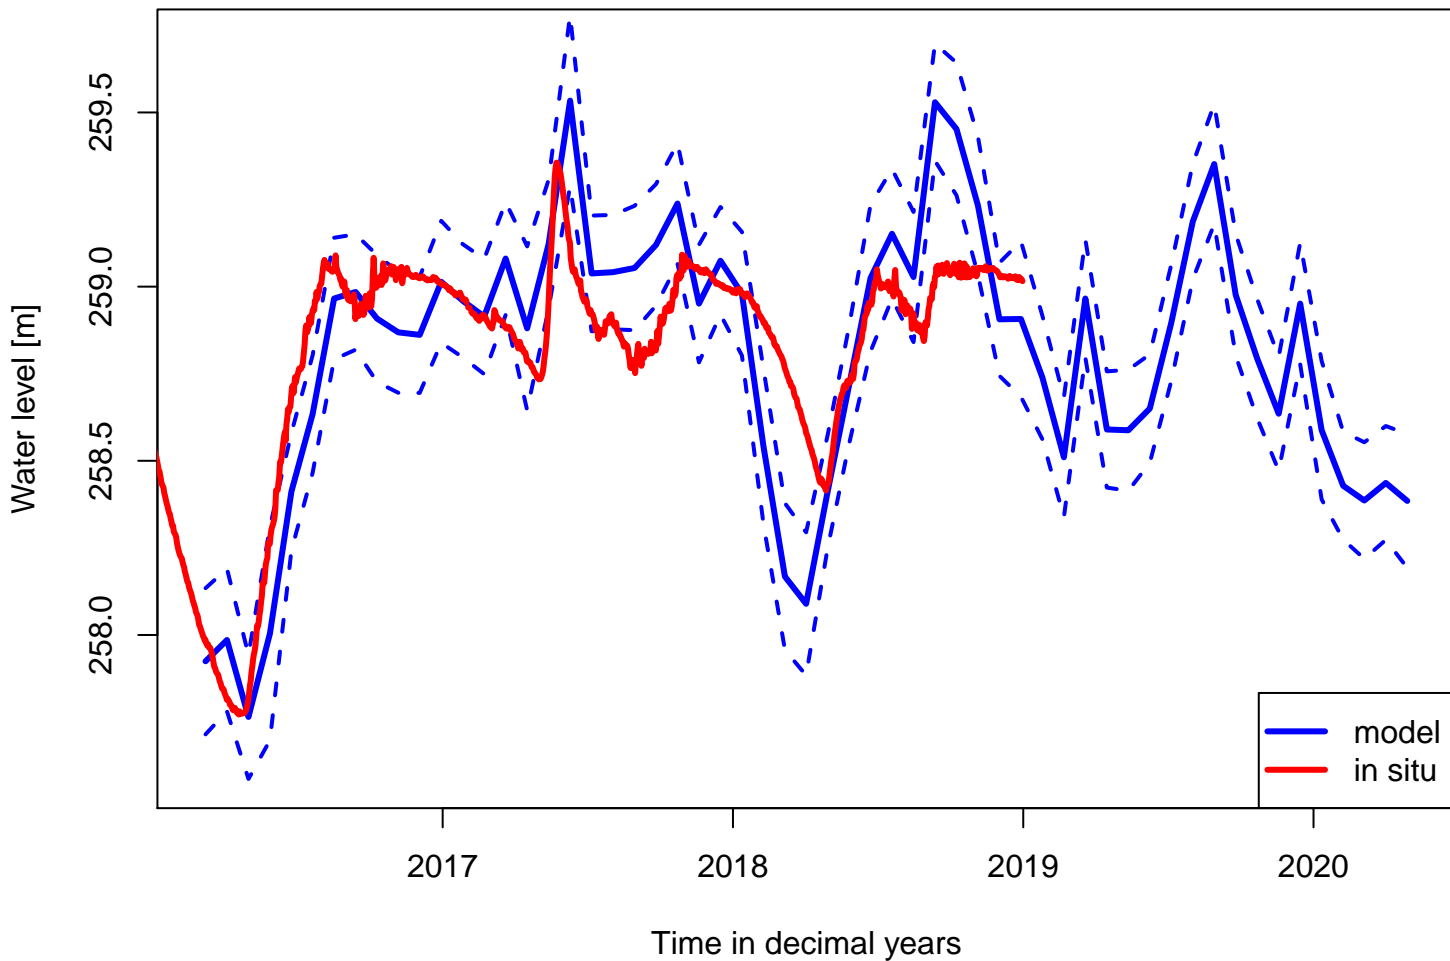

Supplement: s1 [file s1]

**lakename: Babine lakeid: 517 lat: 55.32 lon: -126.6**

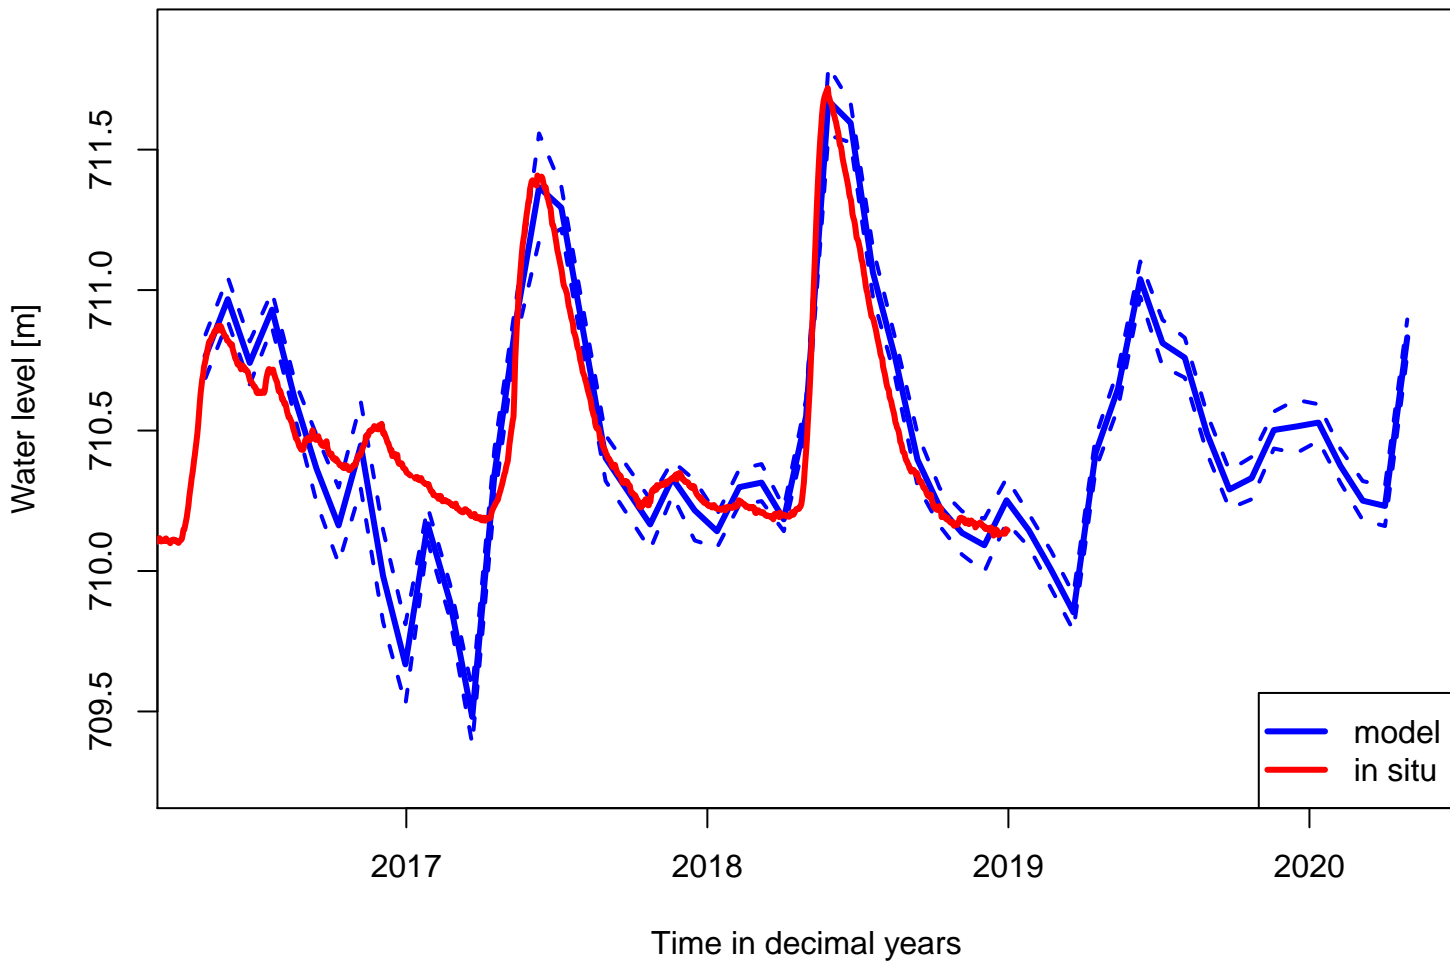

Supplement: s1 [file s1]

**lakename: Cedar lakeid: 51 lat: 53.32 lon: -100.3**

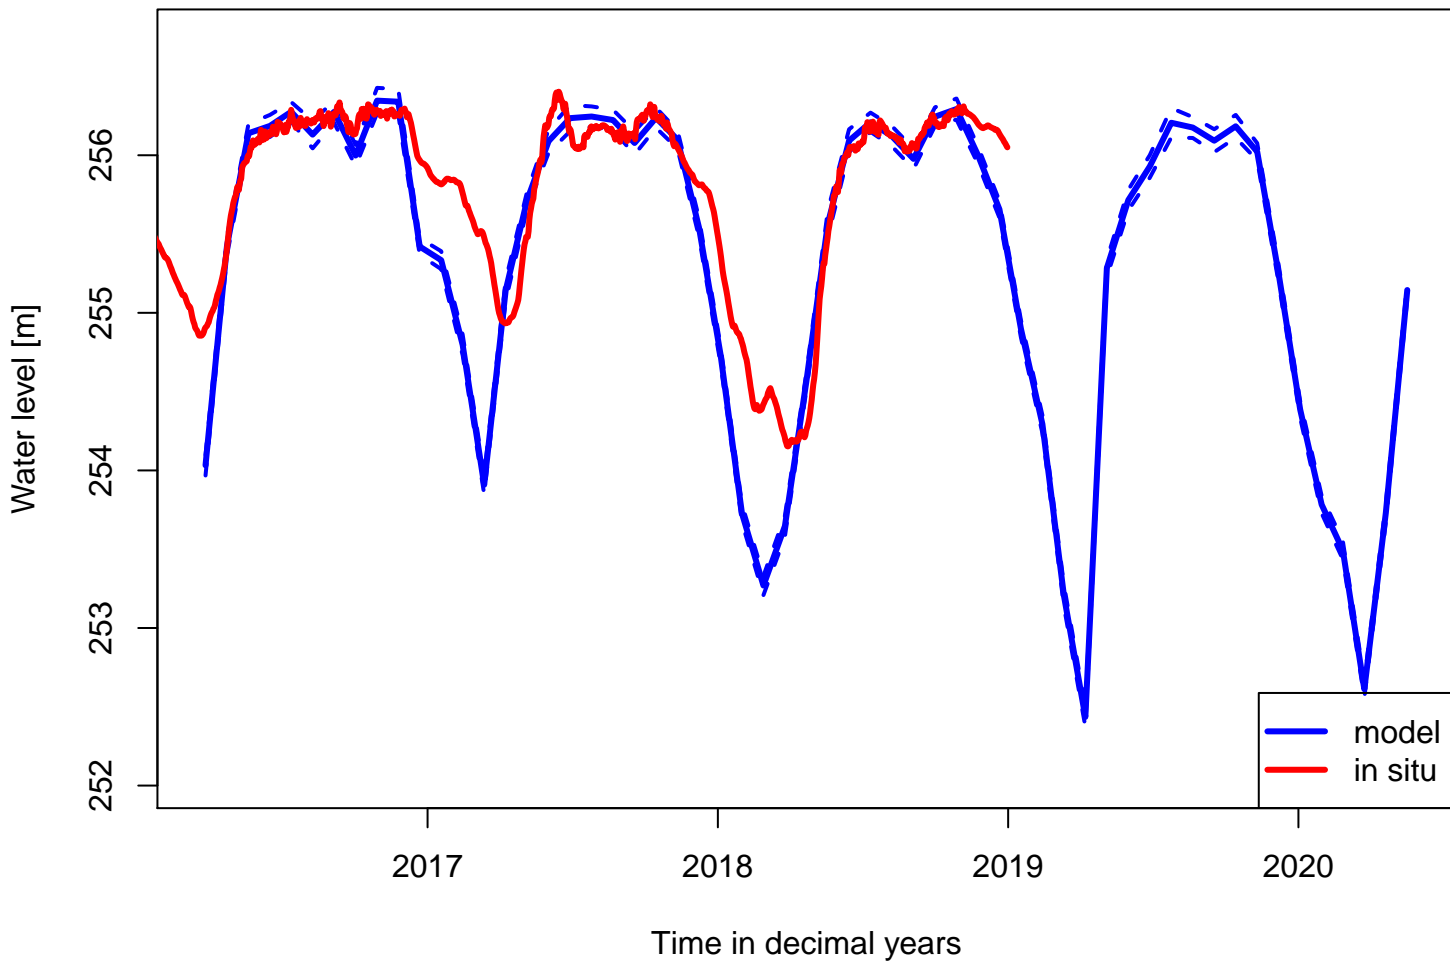

Supplement: s1 [file s1]

**lakename: Arrow lakeid: 698 lat: 49.87 lon: -118.1**

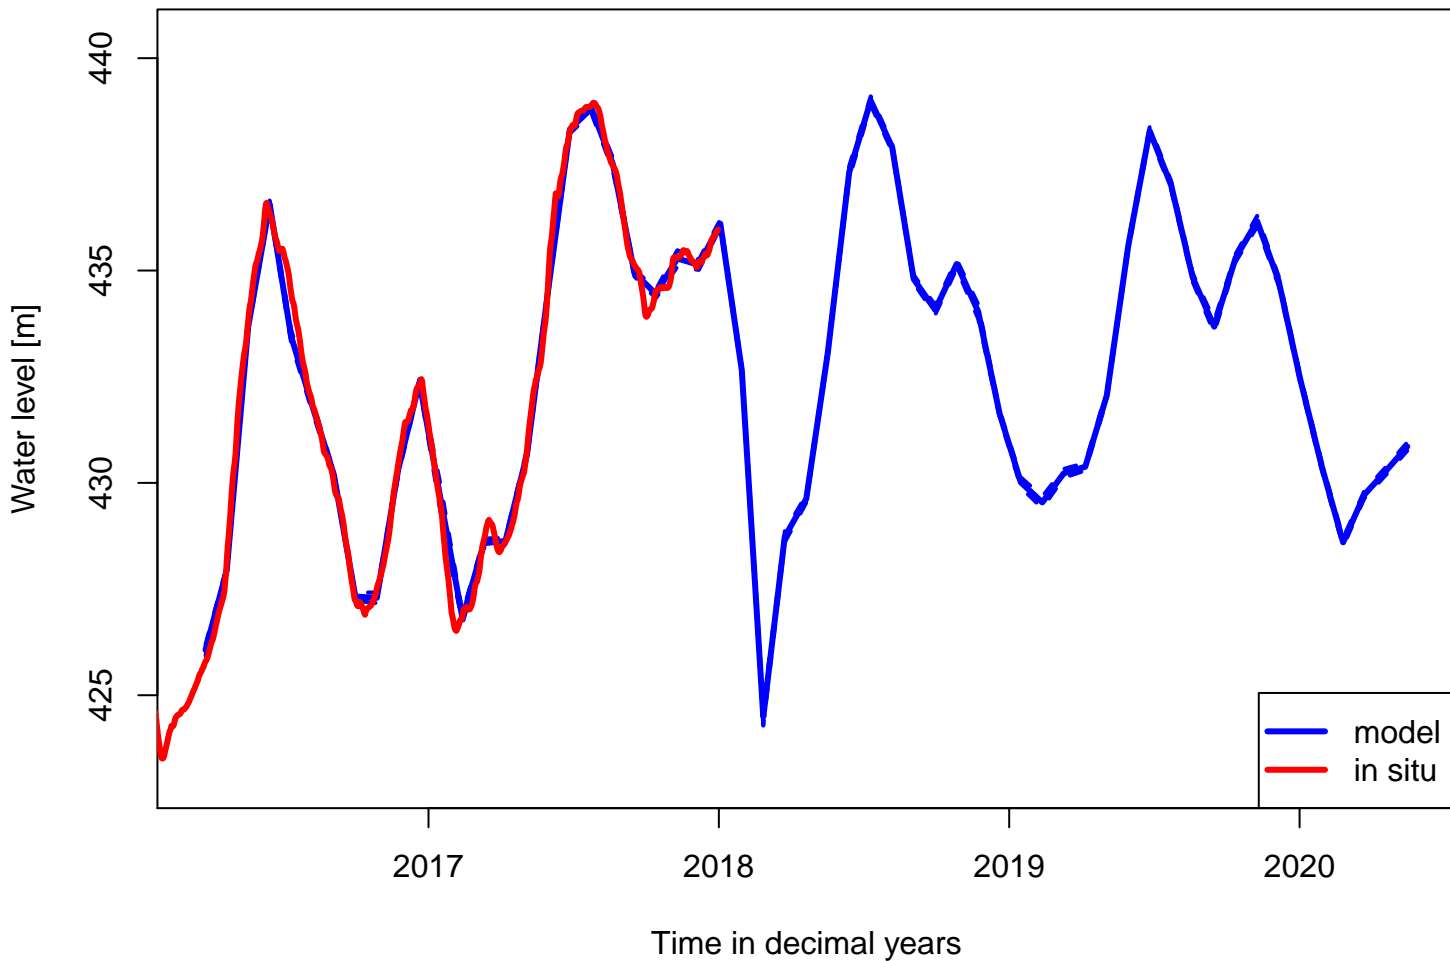

Supplement: s1 [file s1]

**lakename: Lake Havasu lakeid: 9392 lat: 34.32 lon: -114.2**

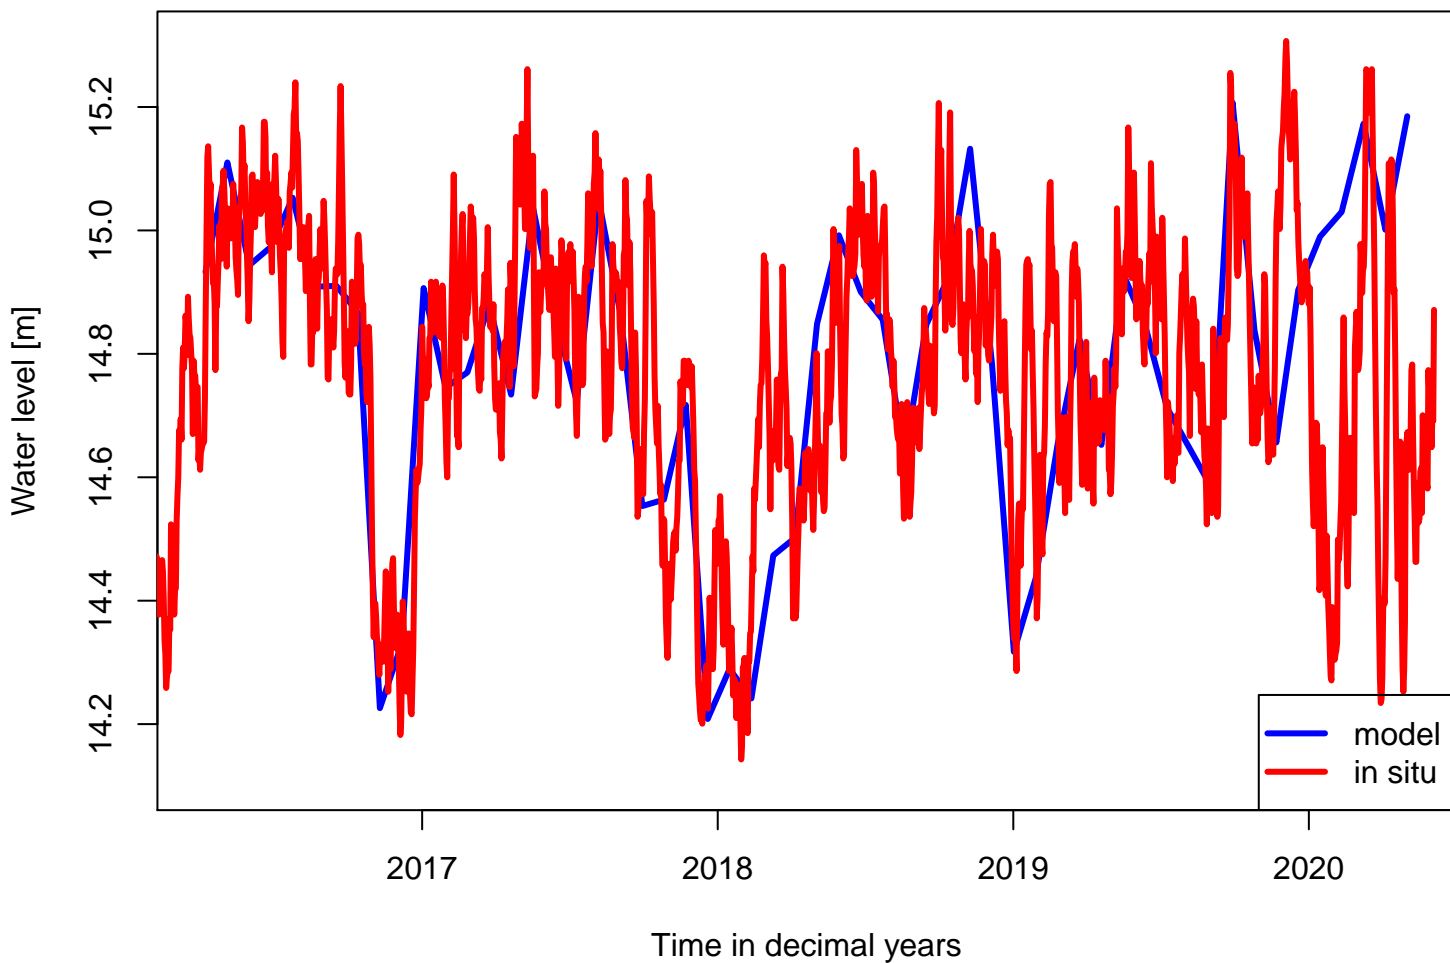

Supplement: s1 [file s1]

**lakename: Sipiwesk lakeid: 520 lat: 55.09 lon: -97.5**

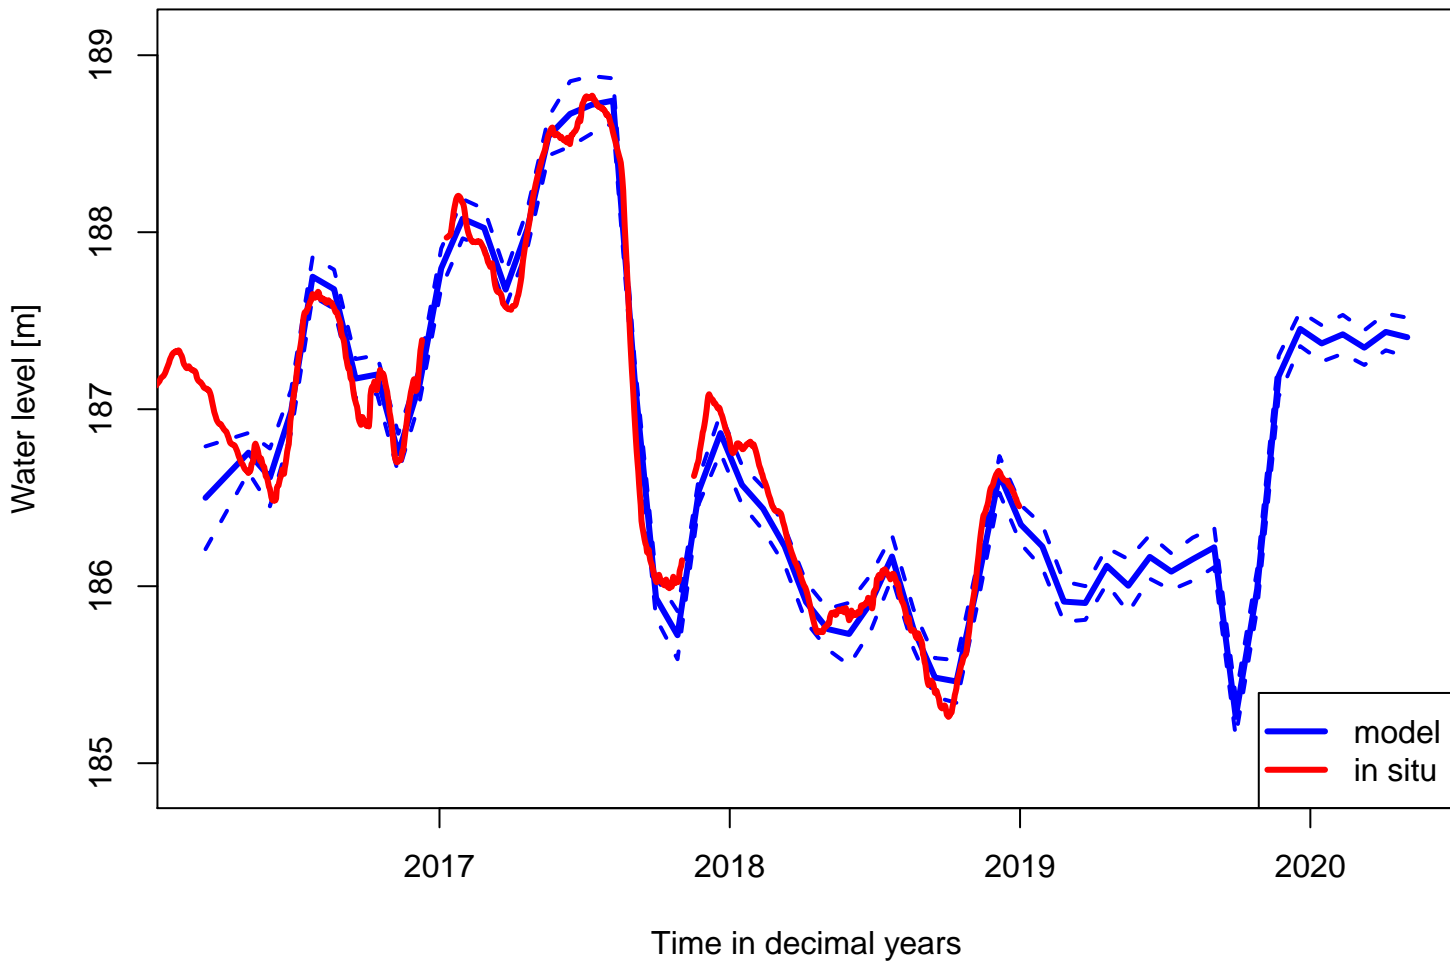

Supplement: s1 [file s1]

**lakename: Flathead Lake lakeid: 730 lat: 47.7 lon: -114.2**

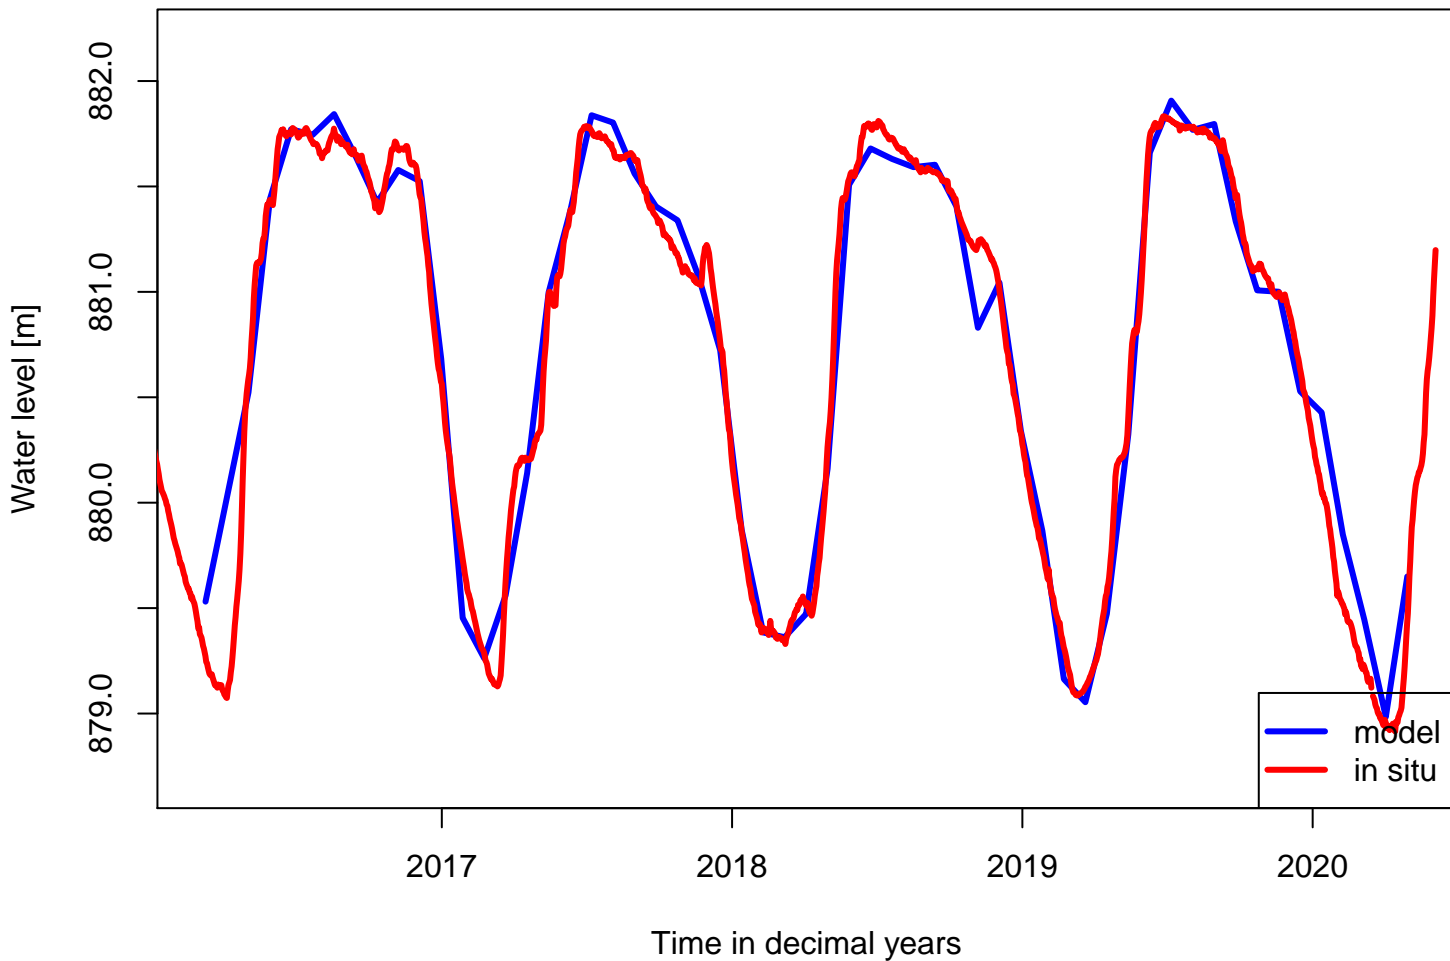

Supplement: s1 [file s1]

**lakename: Southern Indian lakeid: 37 lat: 56.78 lon: -99.53**

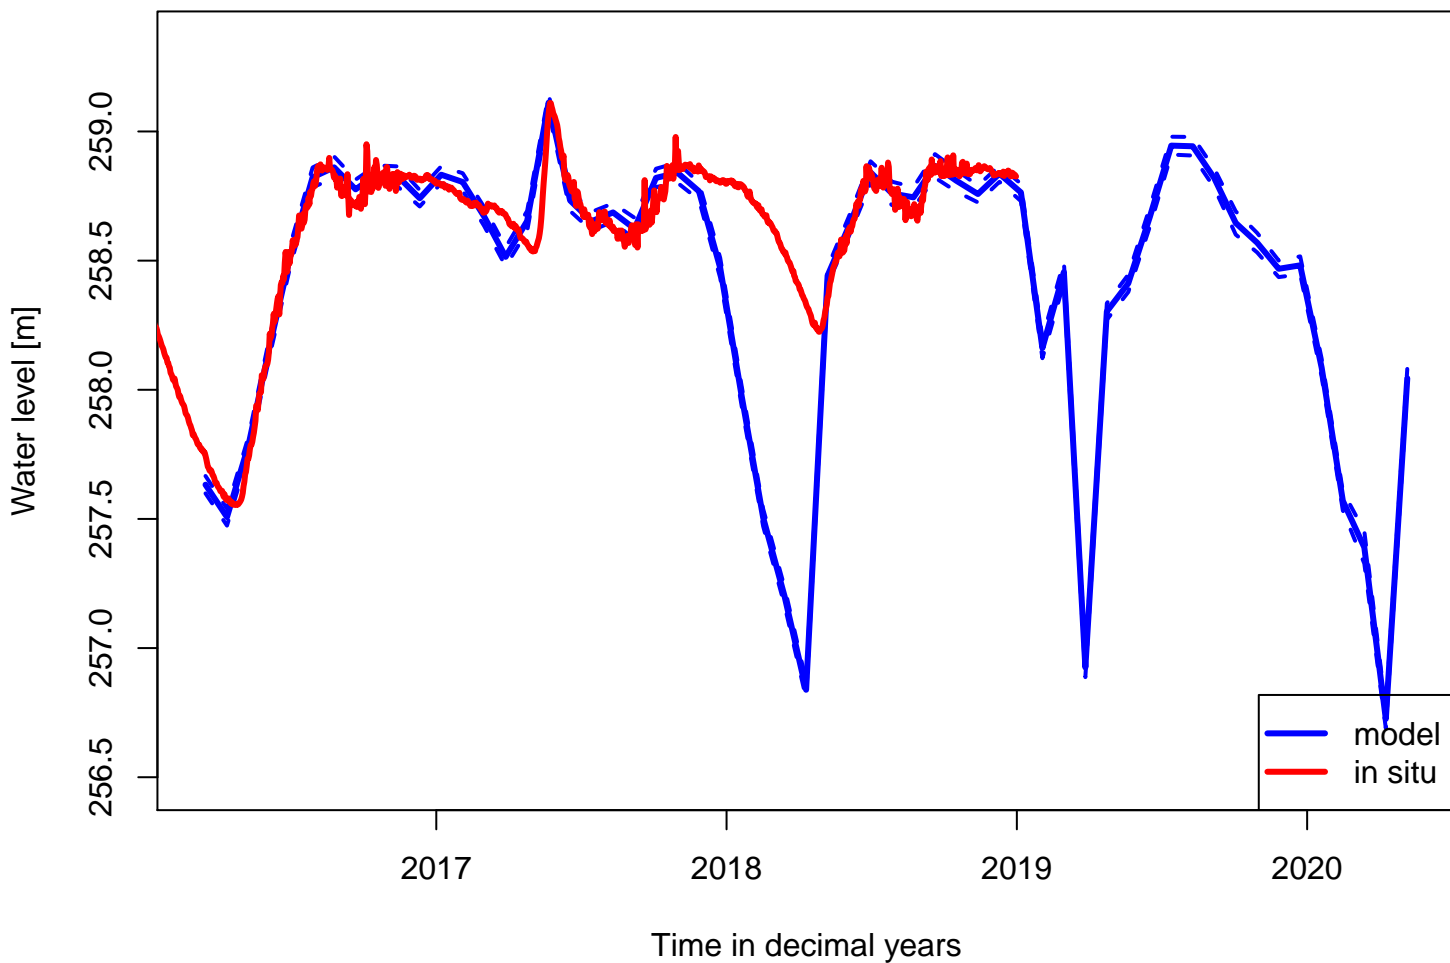

Supplement: s1 [file s1]

**lakename: Lesser Slave lakeid: 42 lat: 55.31 lon: -114.8**

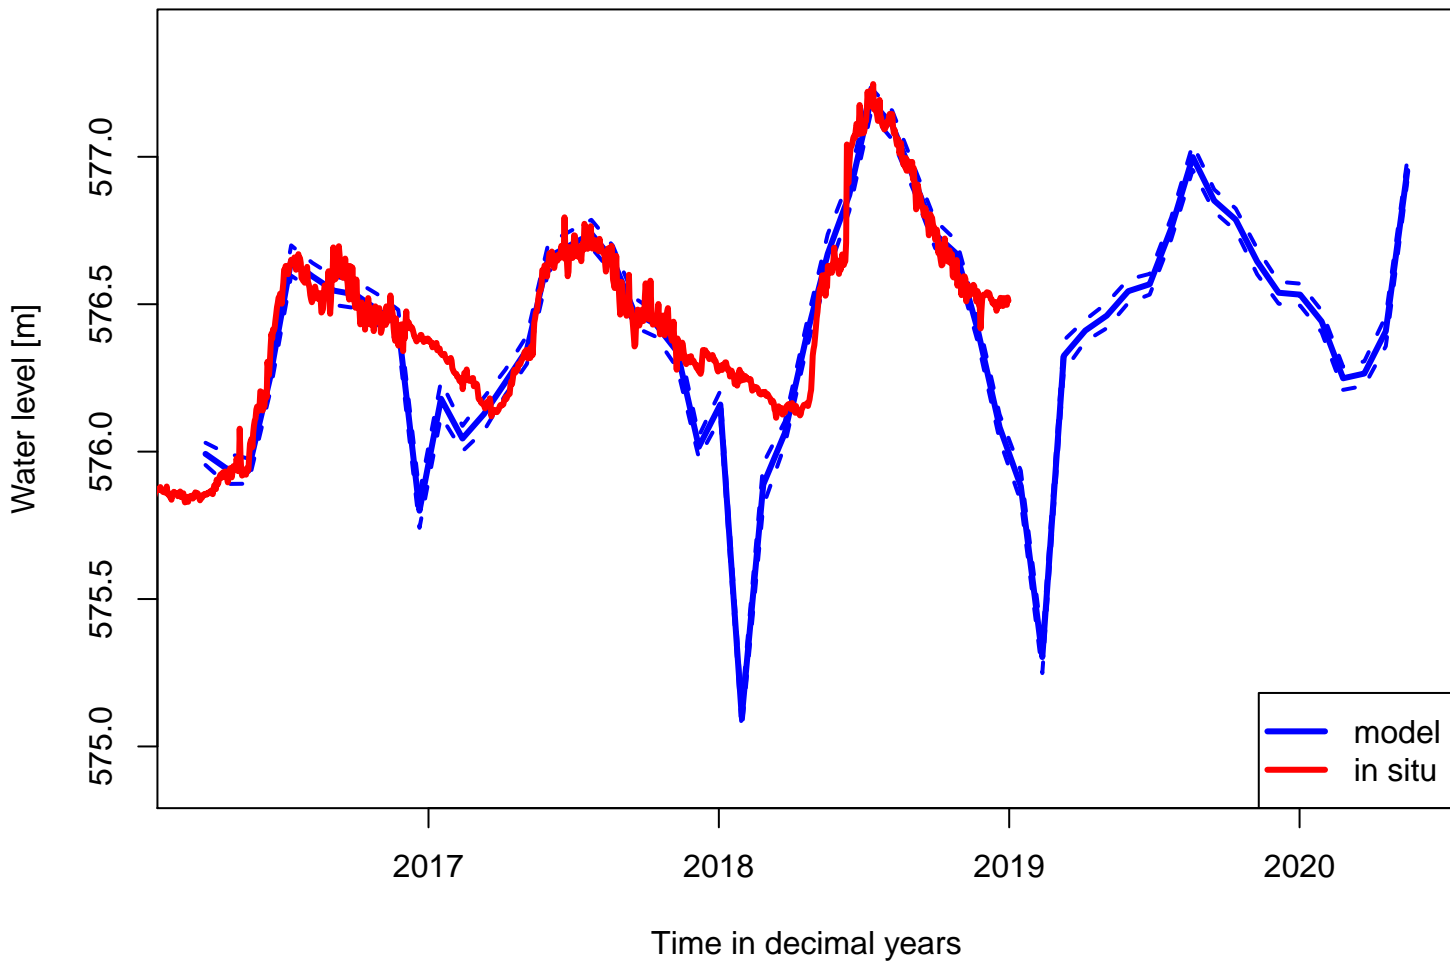

Supplement: s1 [file s1]

**lakename: Babine lakeid: 517 lat: 55.32 lon: -126.6**

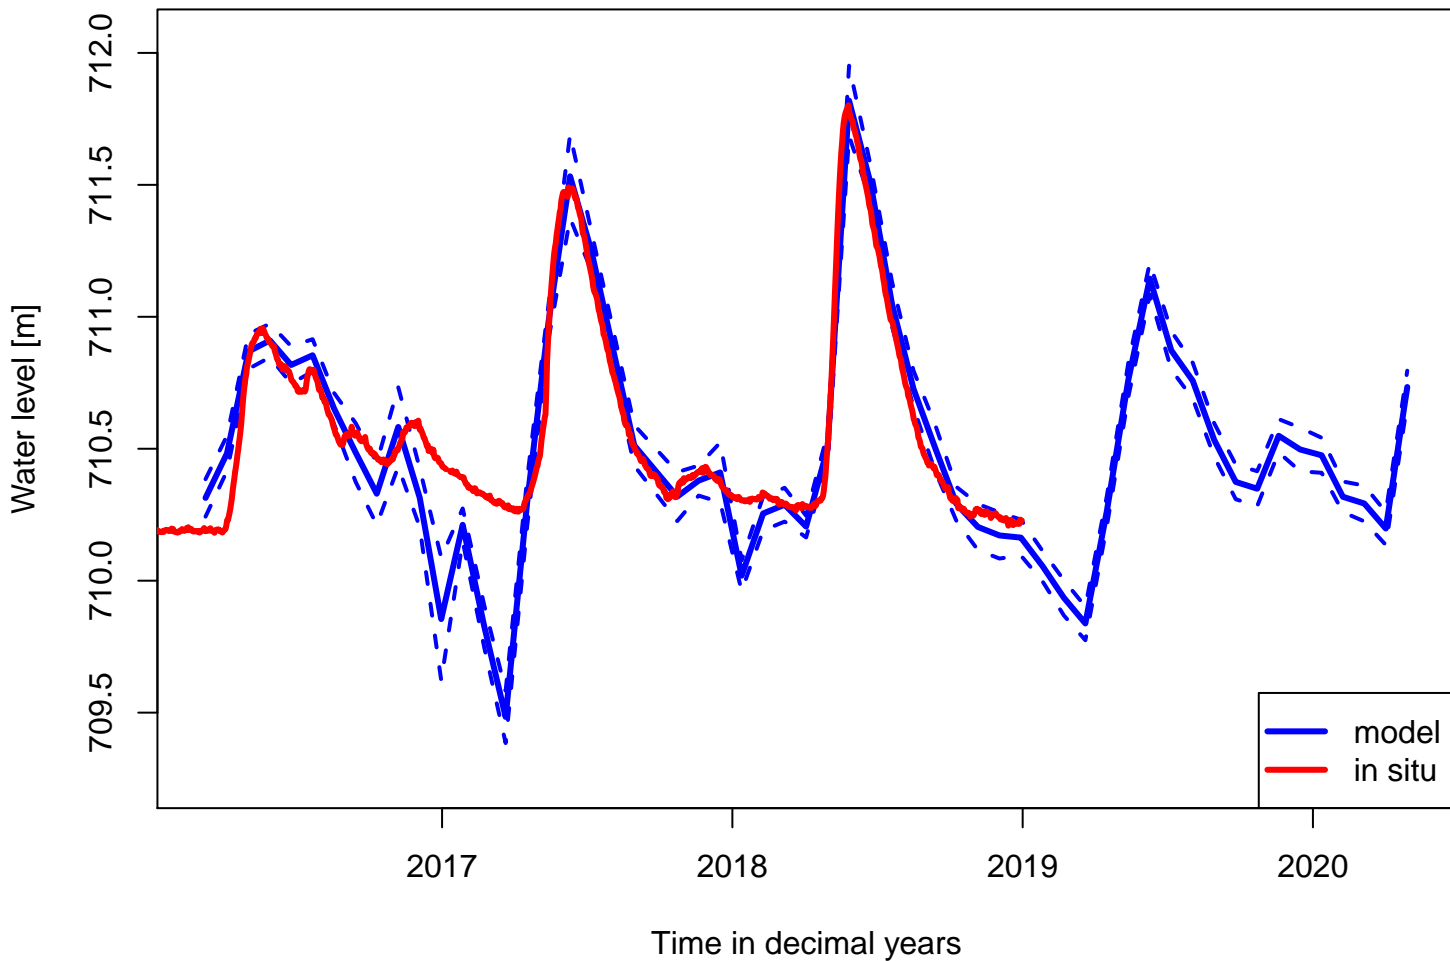

Supplement: s1 [file s1]

**lakename: lakeid: 633 lat: 52.04 lon: -95.46**

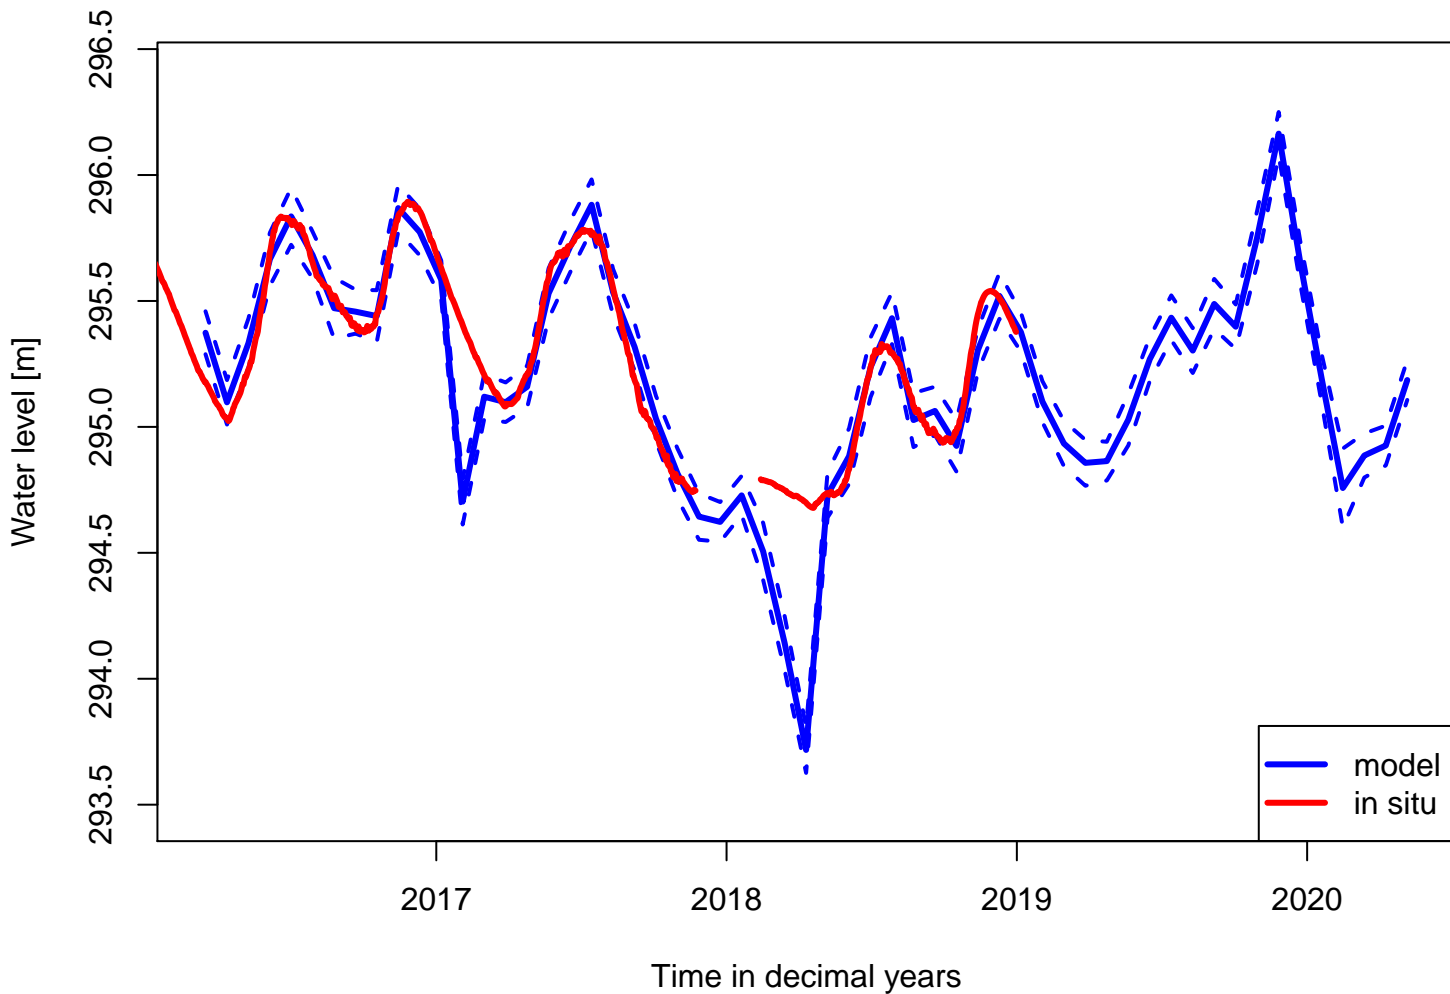

Supplement: s1 [file s1]

**lakename: Nechako Reservoir lakeid: 591 lat: 53.65 lon: -127.5**

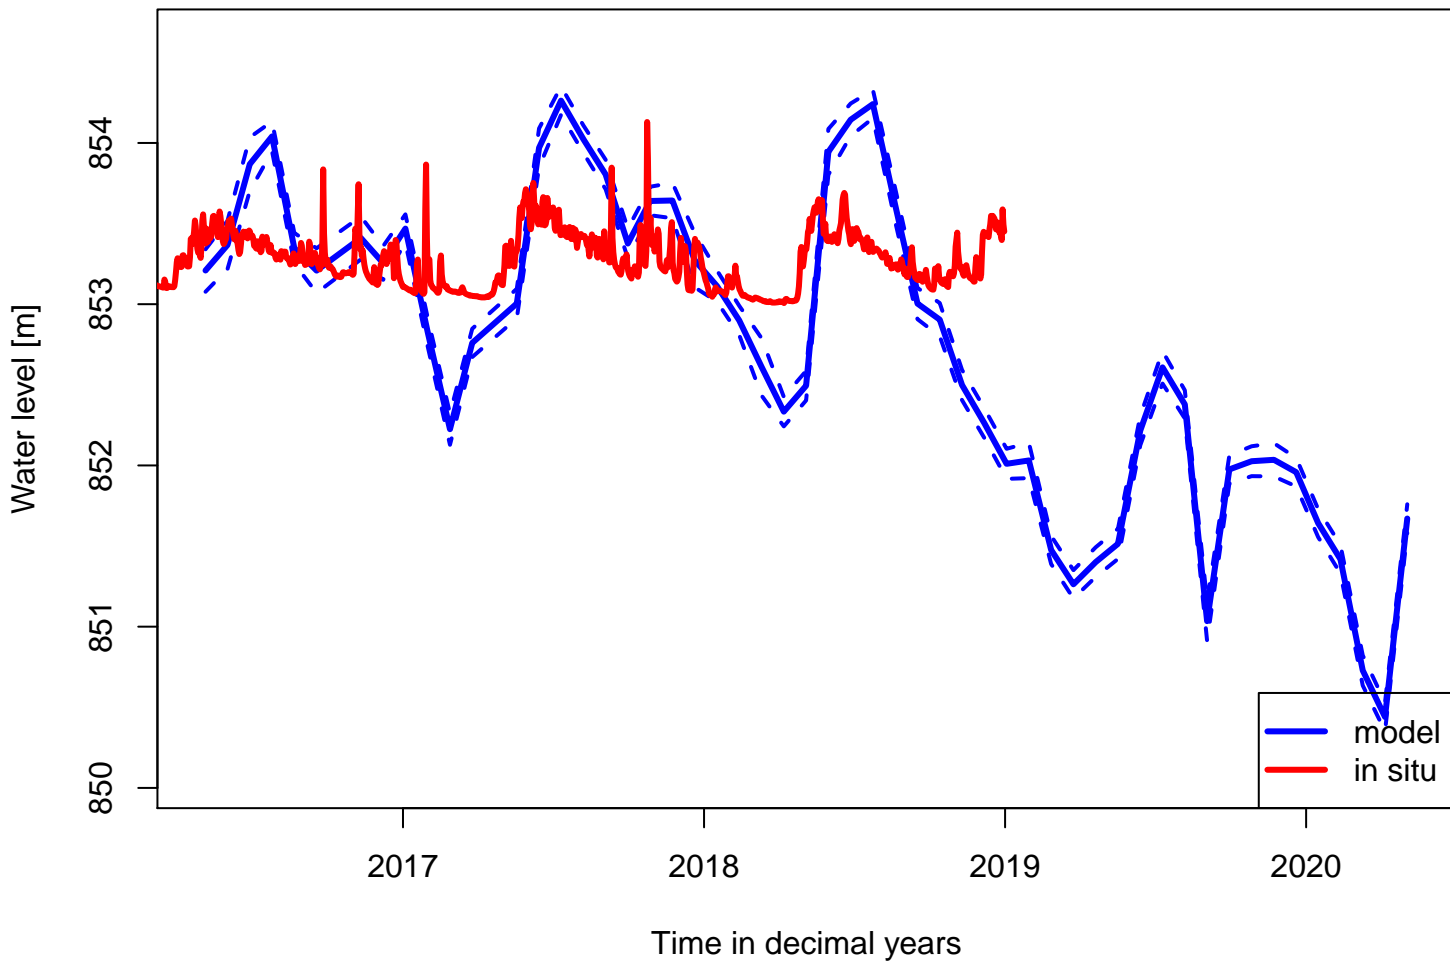

Supplement: s1 [file s1]

**lakename: lakeid: 6993 lat: 53.12 lon: -108.4**

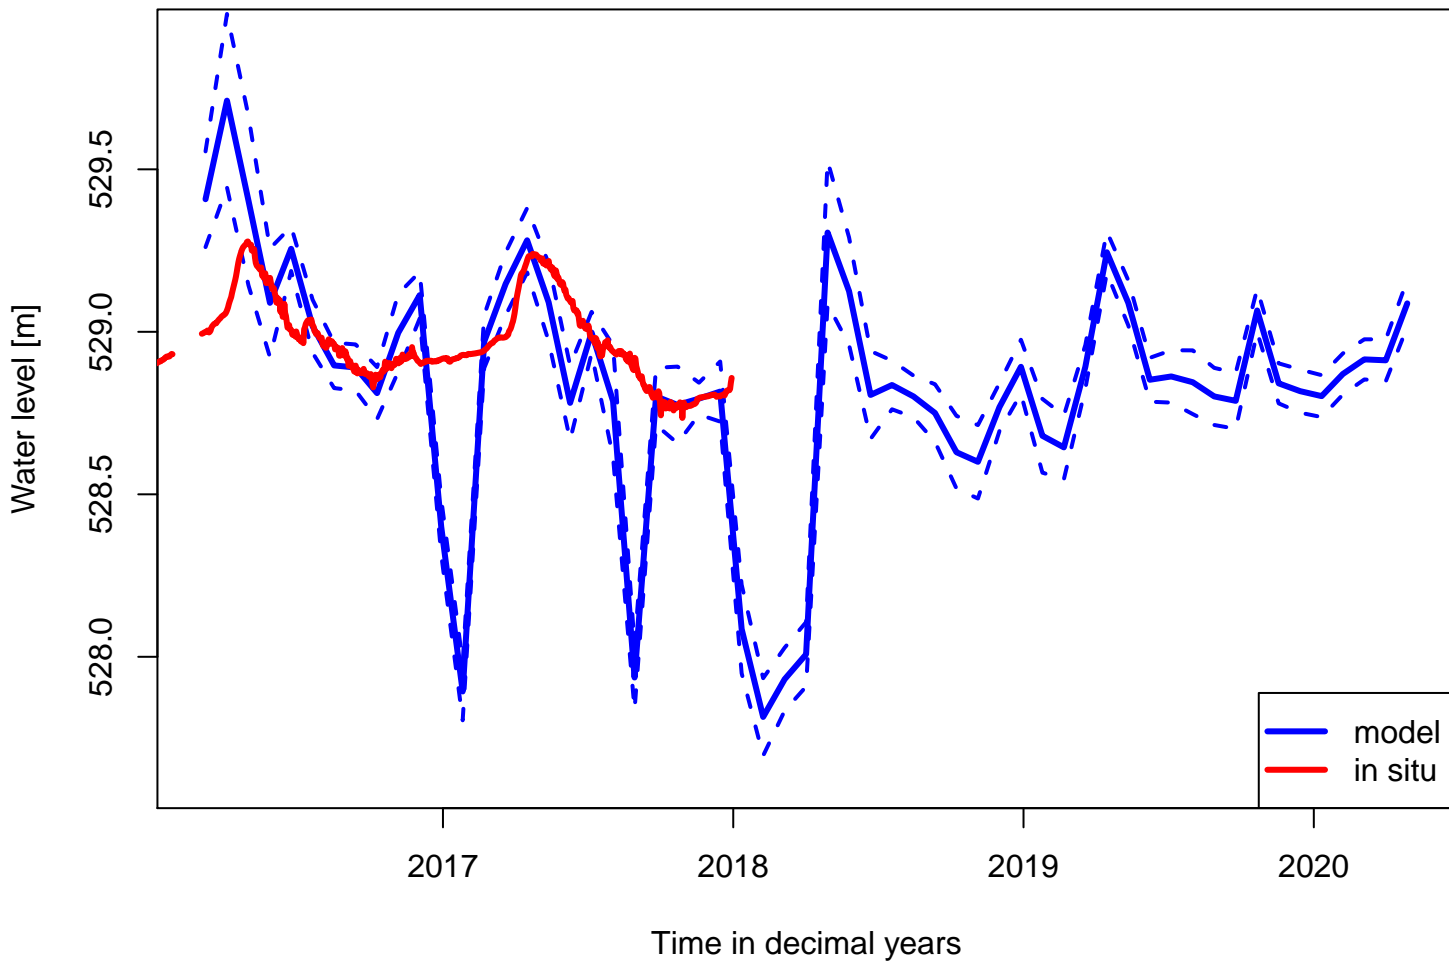

Supplement: s1 [file s1]

**lakename: Reindeer lakeid: 38 lat: 57.88 lon: -101.7**

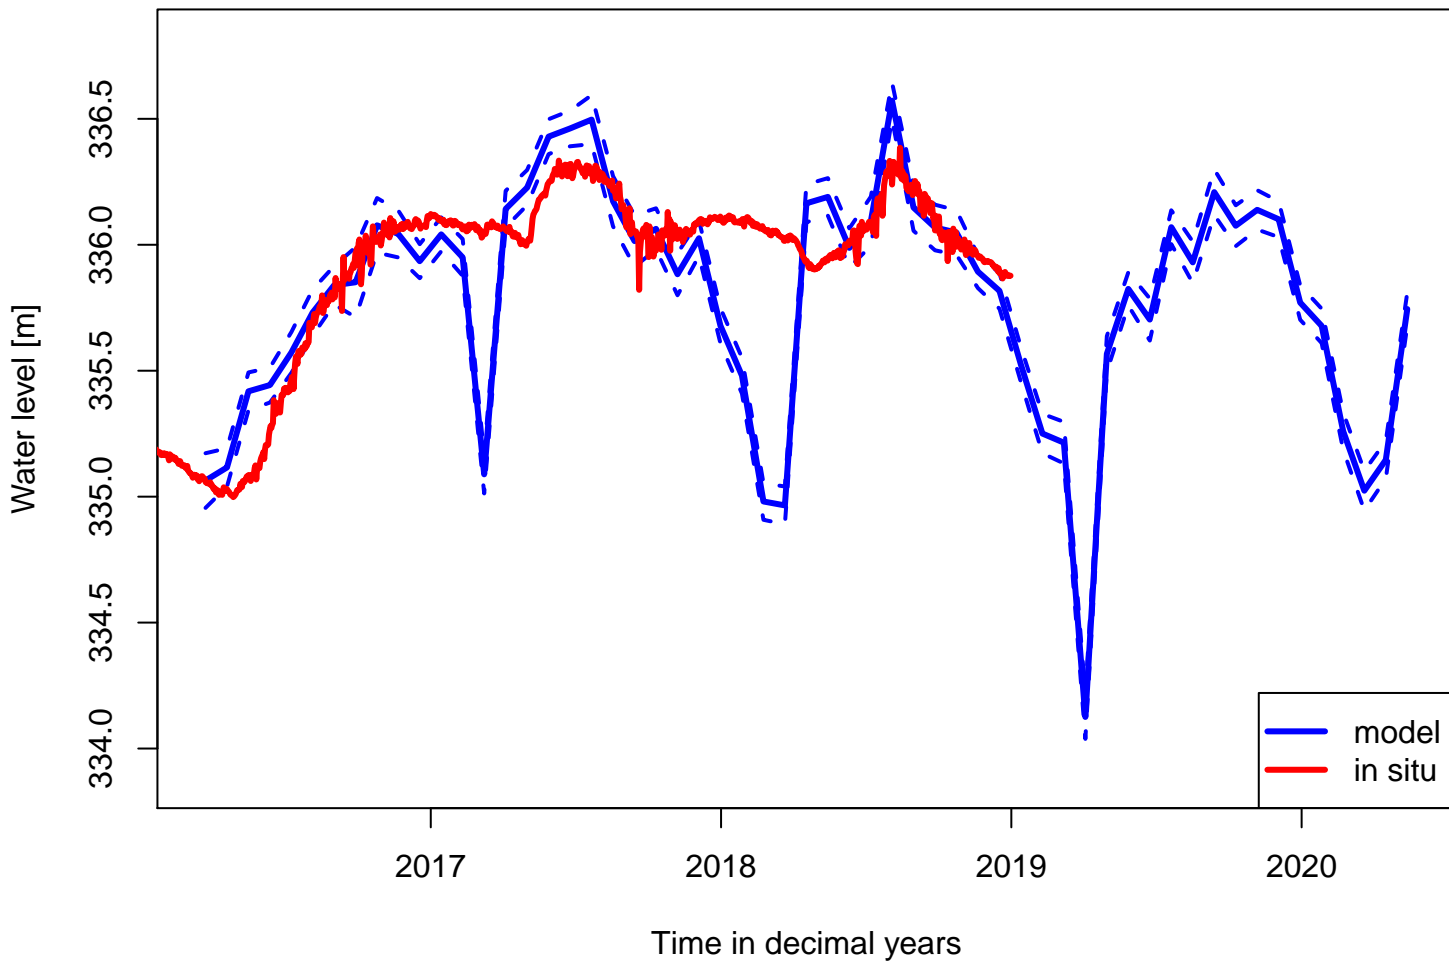

Supplement: s1 [file s1]

**lakename: lakeid: 7175 lat: 52.49 lon: -105**

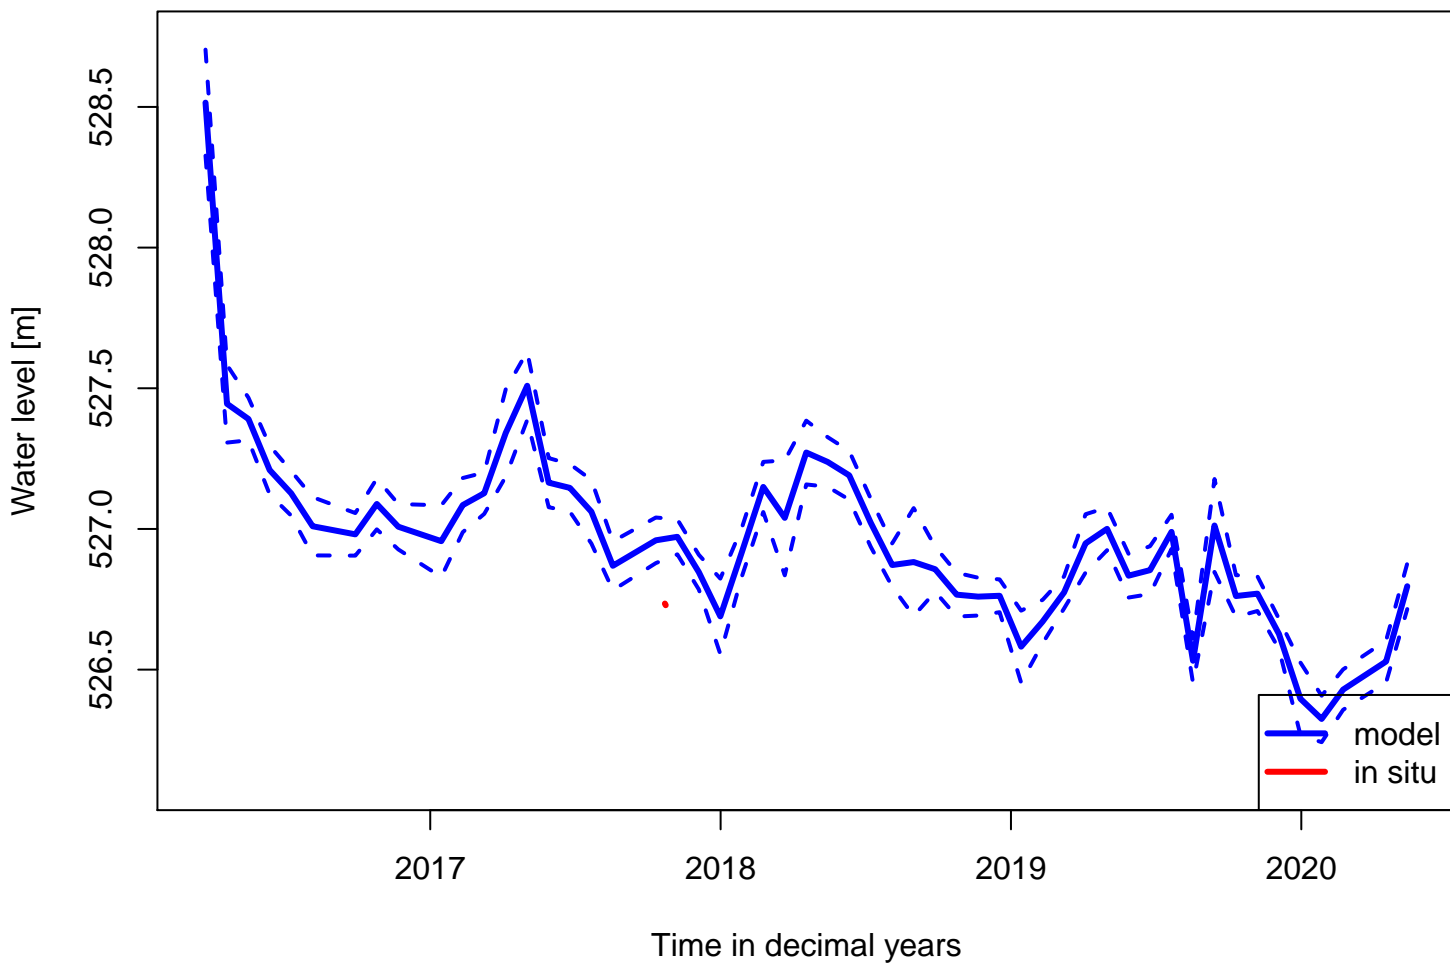

Supplement: s1 [file s1]

**lakename: Atikonak lakeid: 607 lat: 52.97 lon: -64.66**

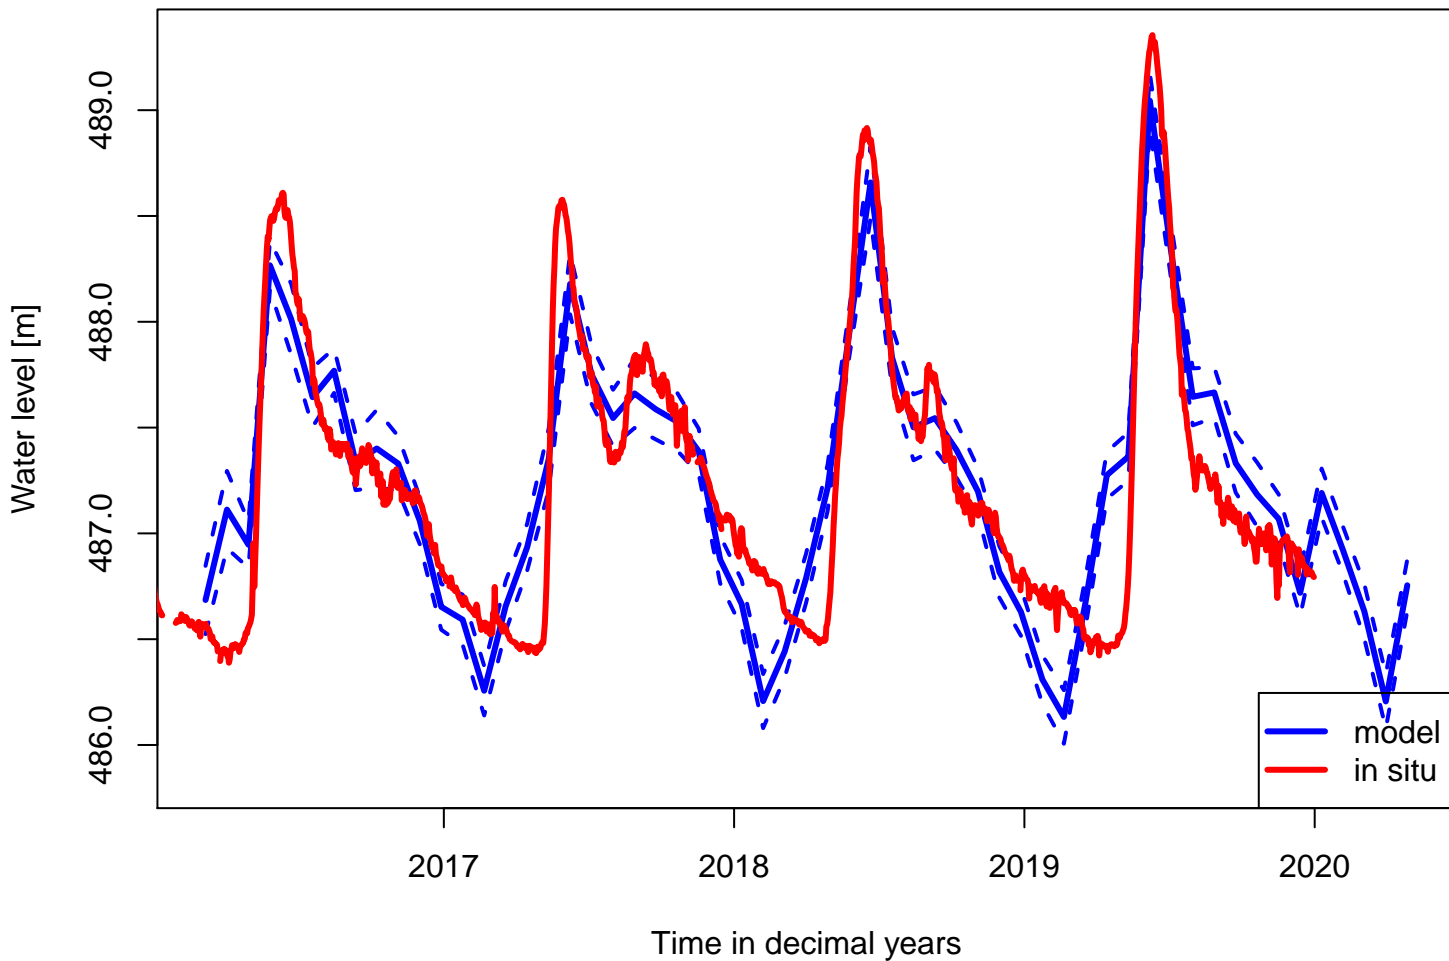

Supplement: s1 [file s1]

**lakename: Artillery lakeid: 327 lat: 62.89 lon: -108.5**

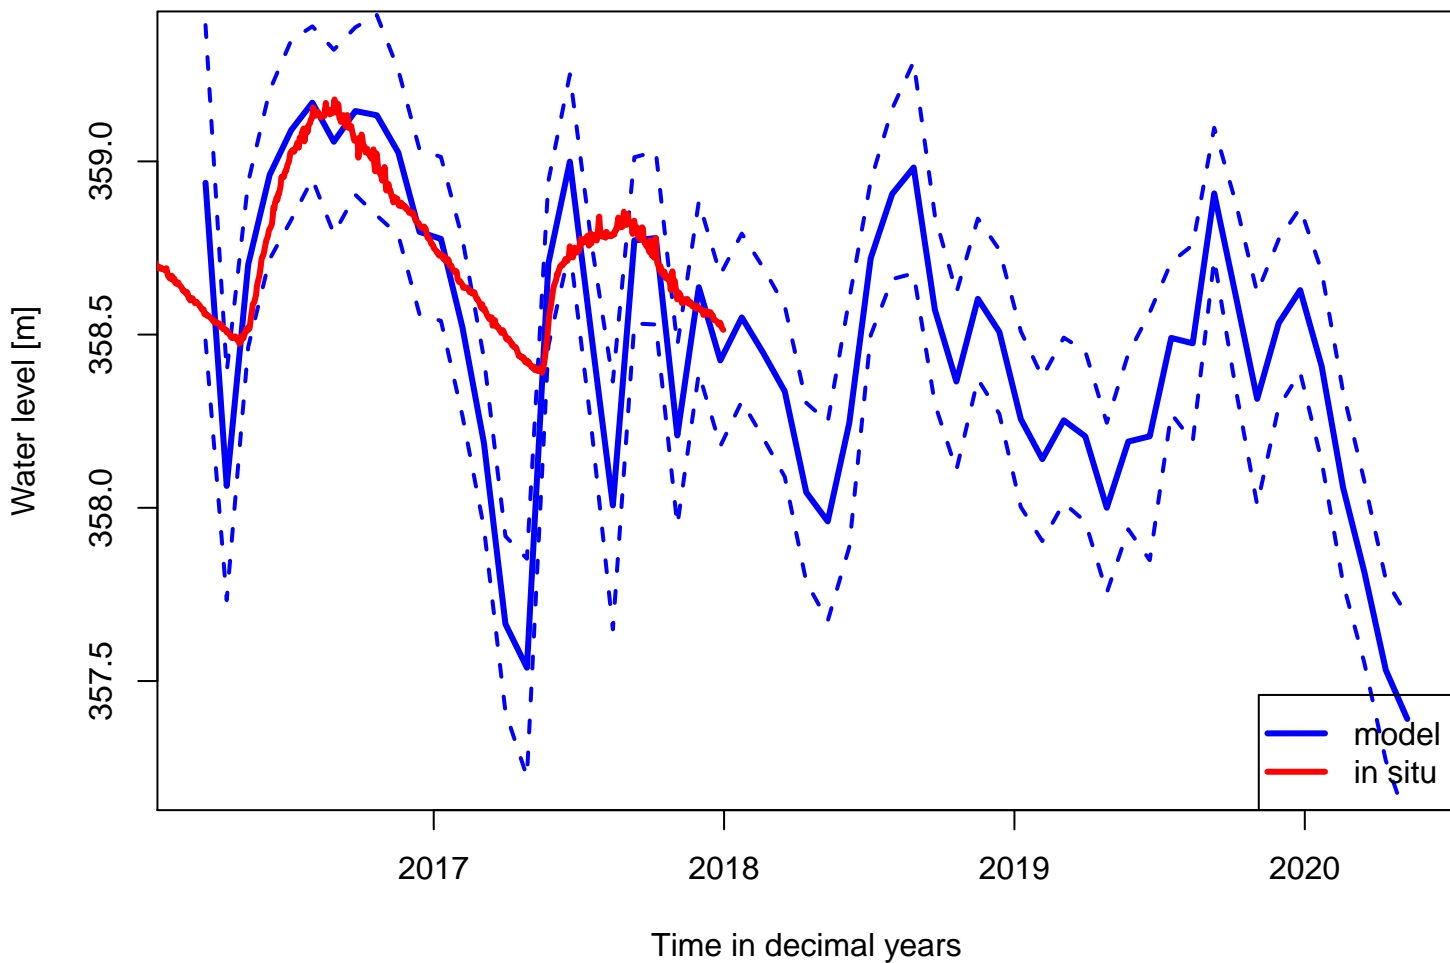

Supplement: s1 [file s1]

**lakename: Moose lakeid: 48 lat: 53.94 lon: -100.1**

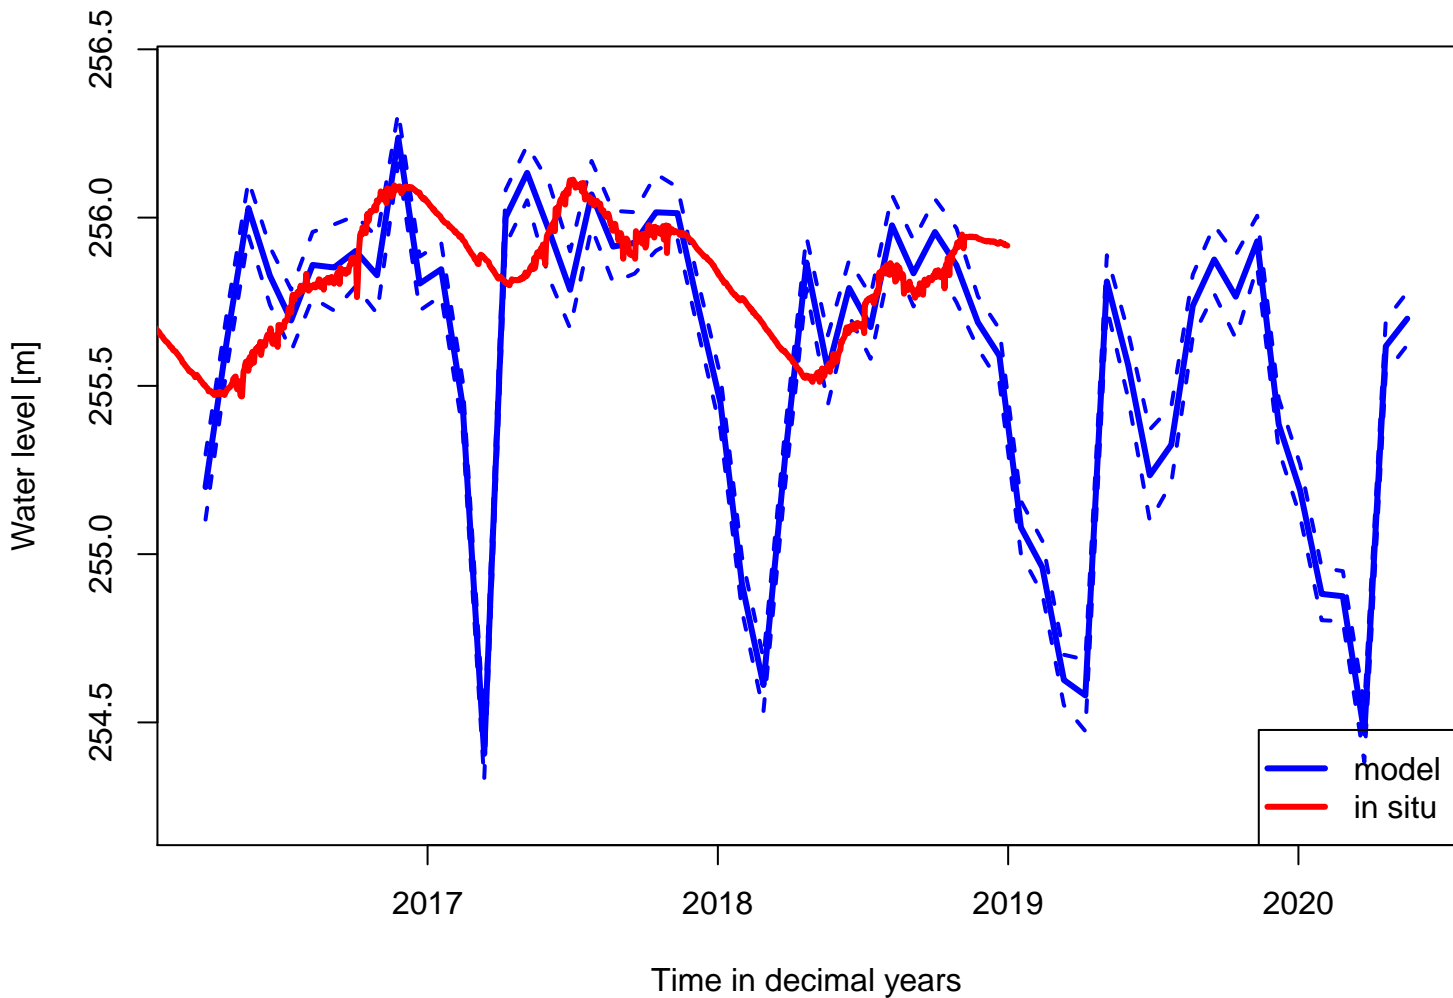

Supplement: s1 [file s1]

**lakename: Ile-a-la-Crosse lakeid: 493 lat: 55.92 lon: -107.7**

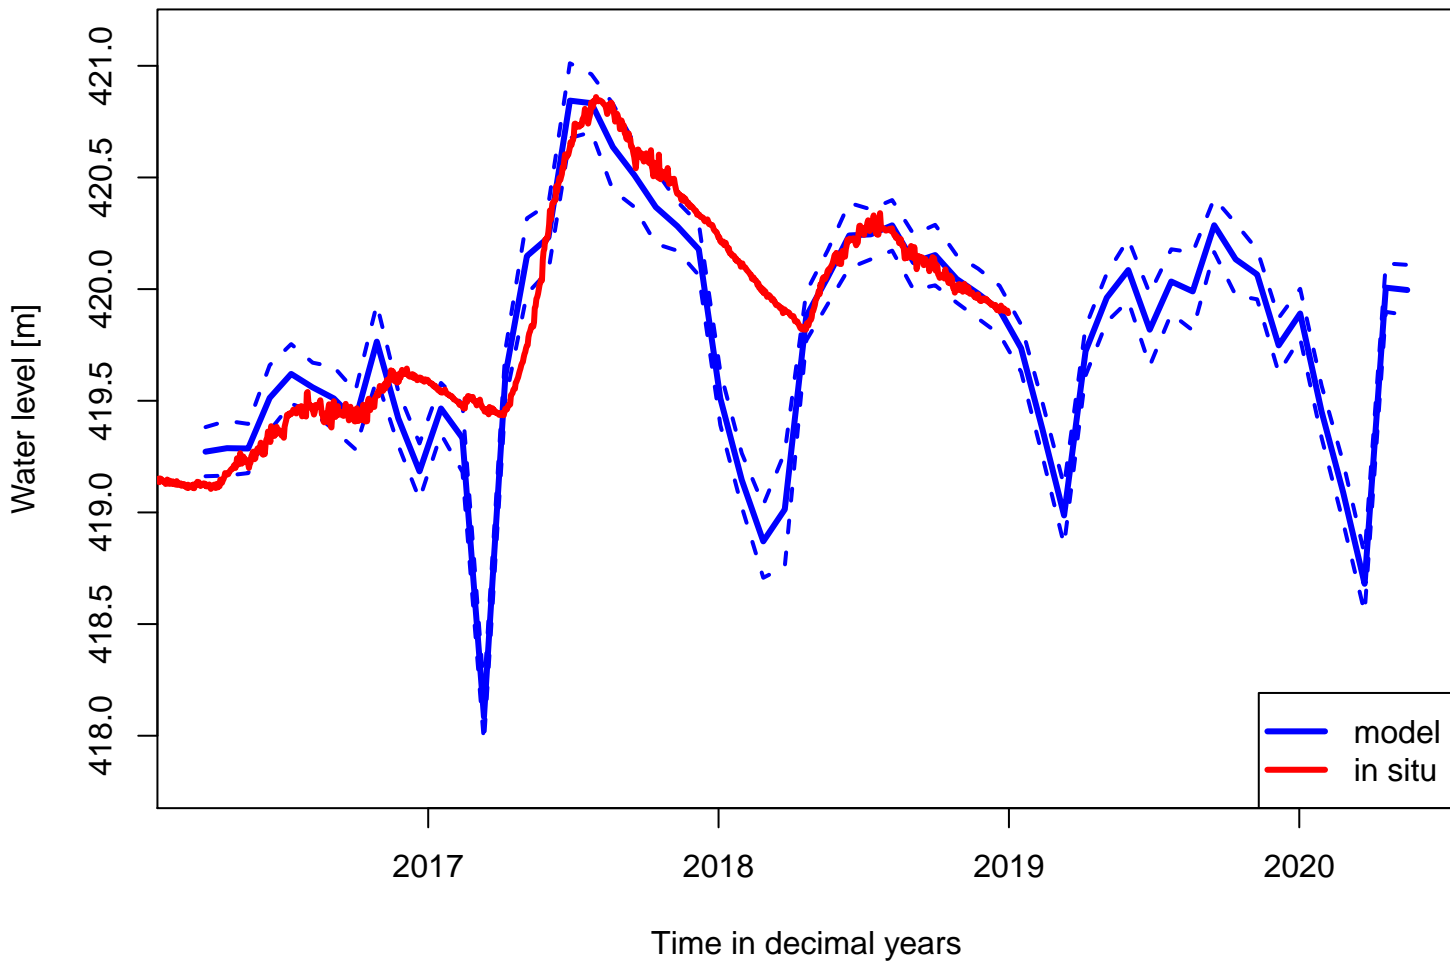

Supplement: s1 [file s1]

**lakename: Franklin D. Roosevelt lakeid: 724 lat: 47.96 lon: -119**

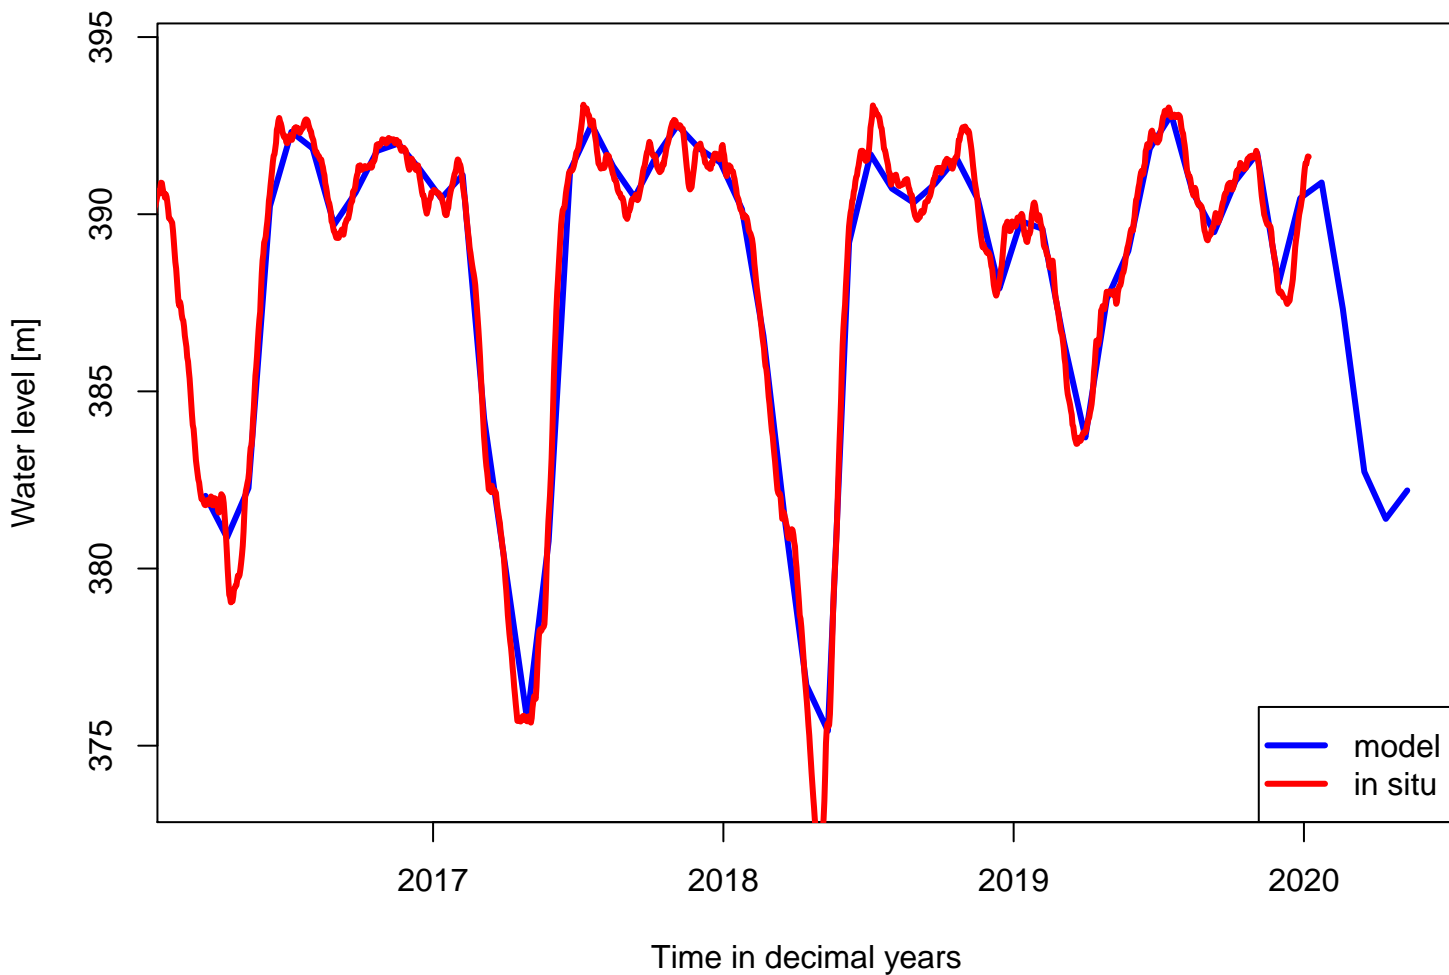

Supplement: s1 [file s1]

**lakename: Ile-a-la-Crosse lakeid: 493 lat: 55.92 lon: -107.7**

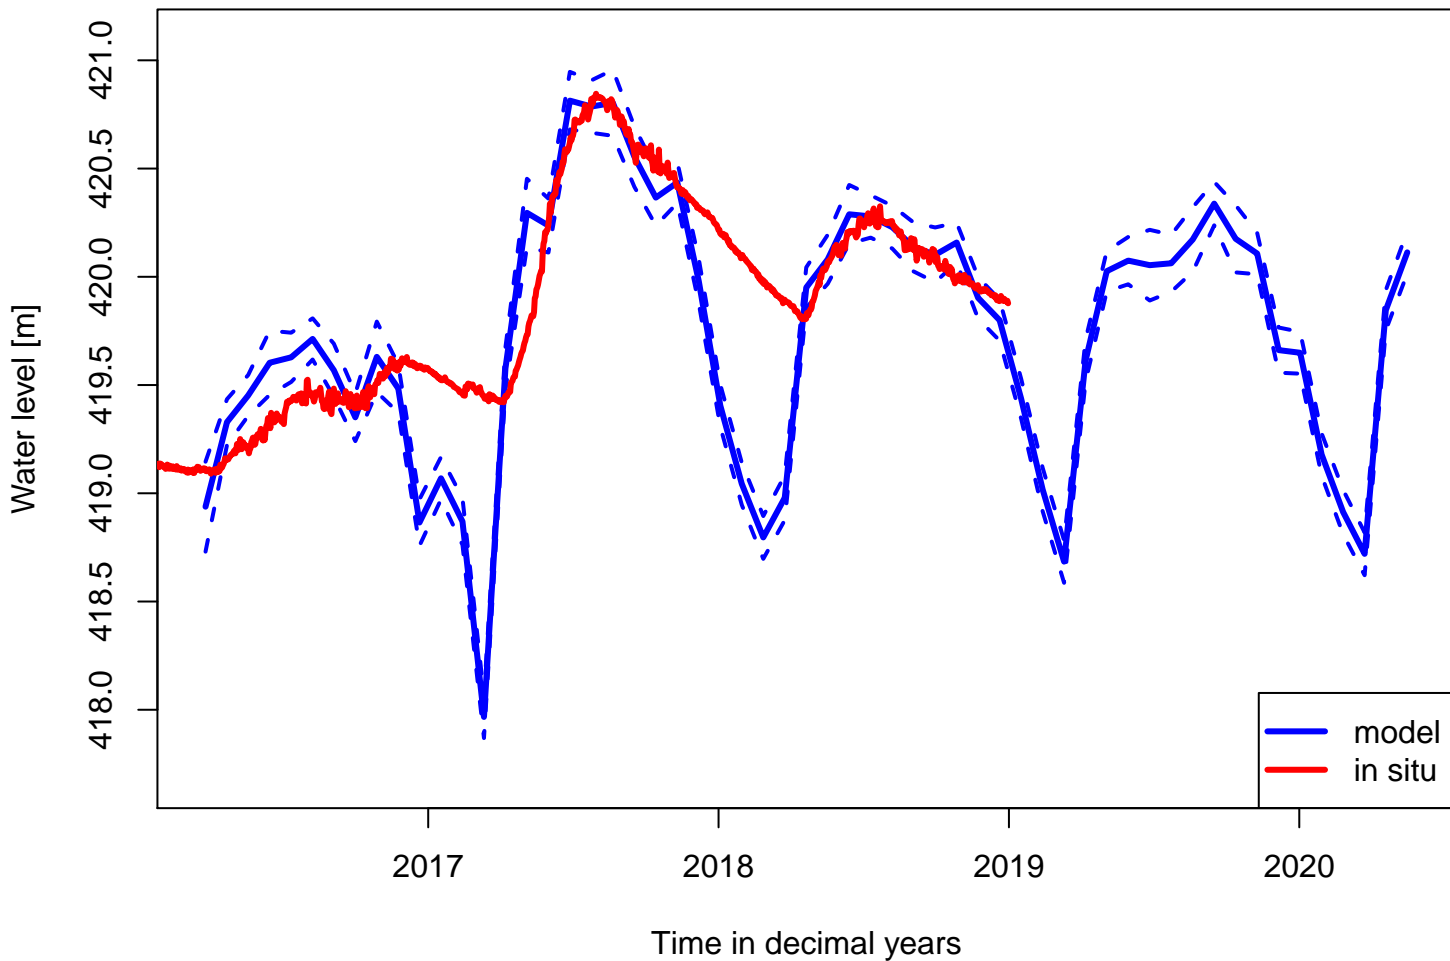

Supplement: s1 [file s1]

**lakename: Chilko lakeid: 636 lat: 51.62 lon: -124.1**

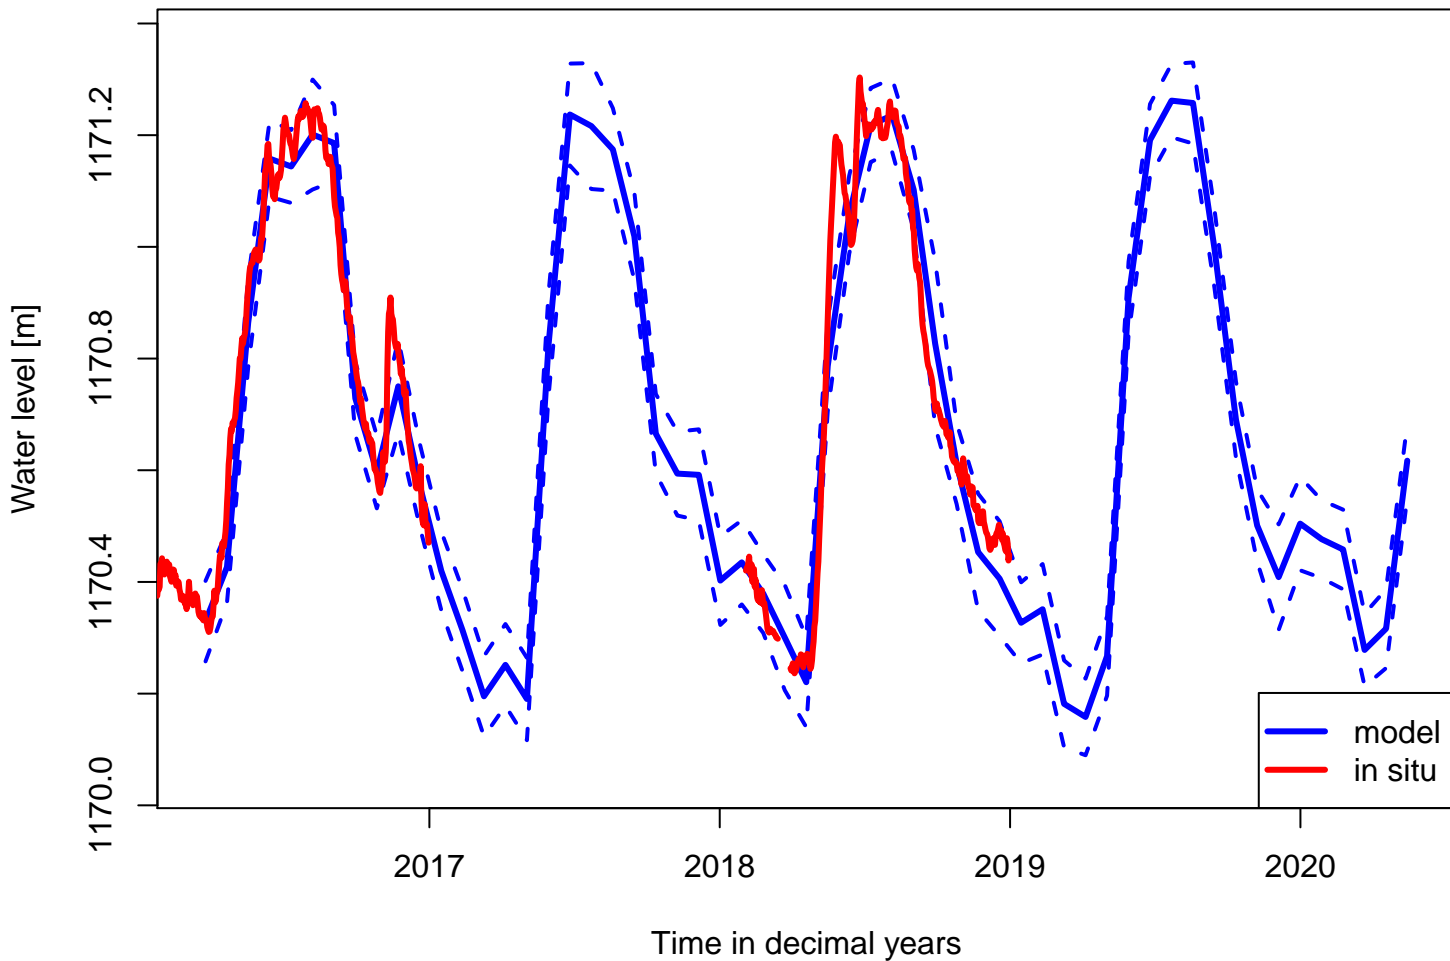

Supplement: s1 [file s1]

**lakename: Lake Chelan lakeid: 727 lat: 48.31 lon: -120.7**

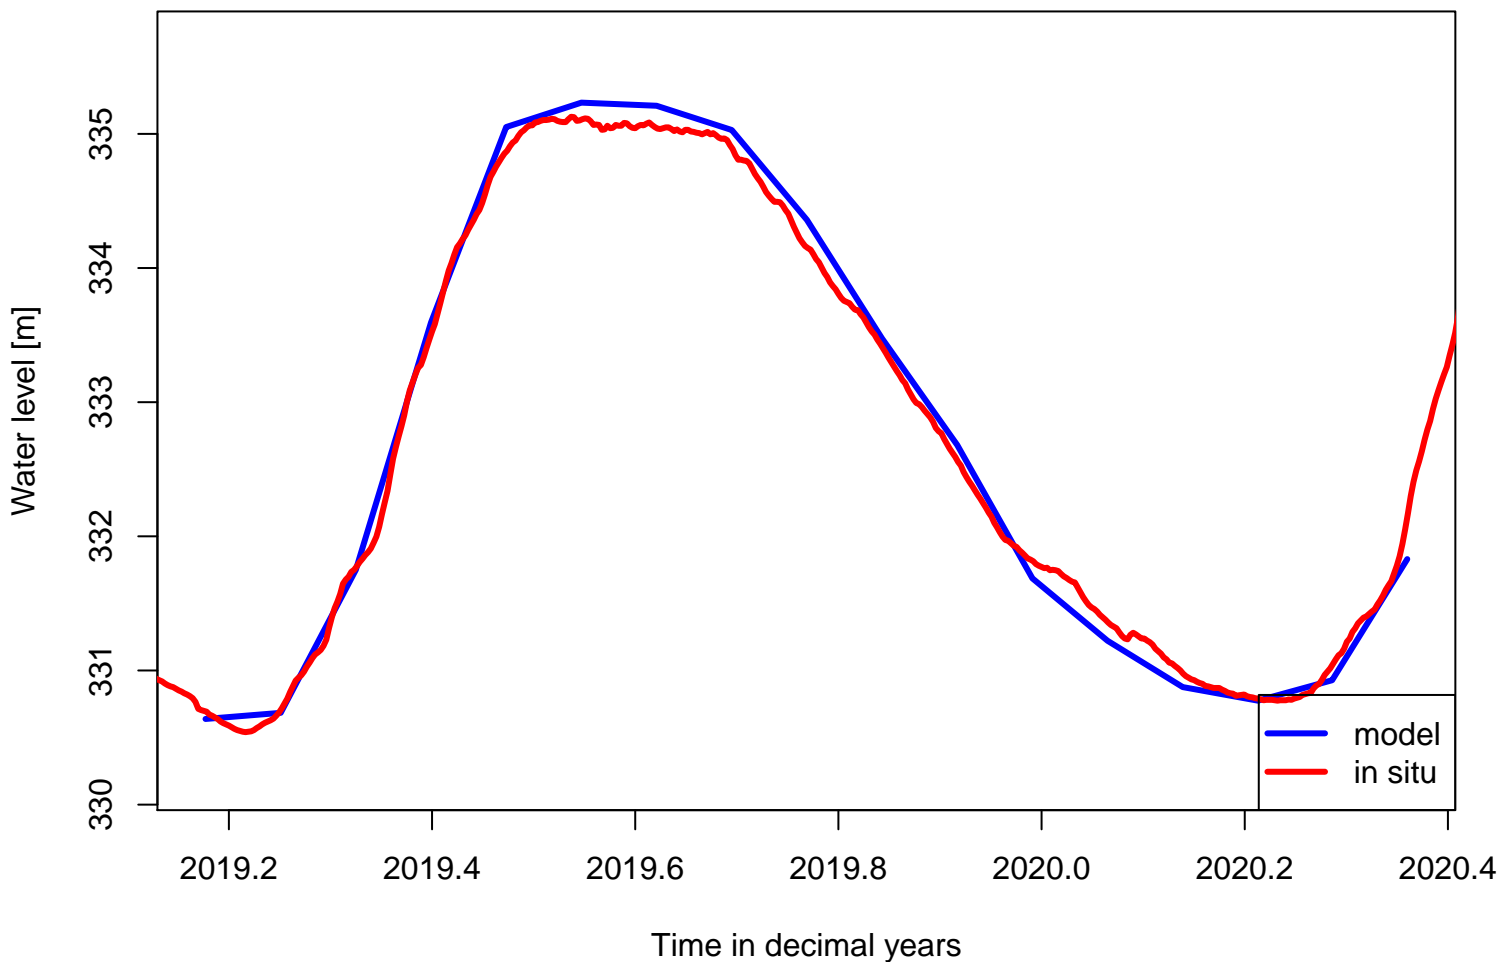

Supplement: s1 [file s1]

**lakename: Tobin lakeid: 589 lat: 53.66 lon: -103.4**

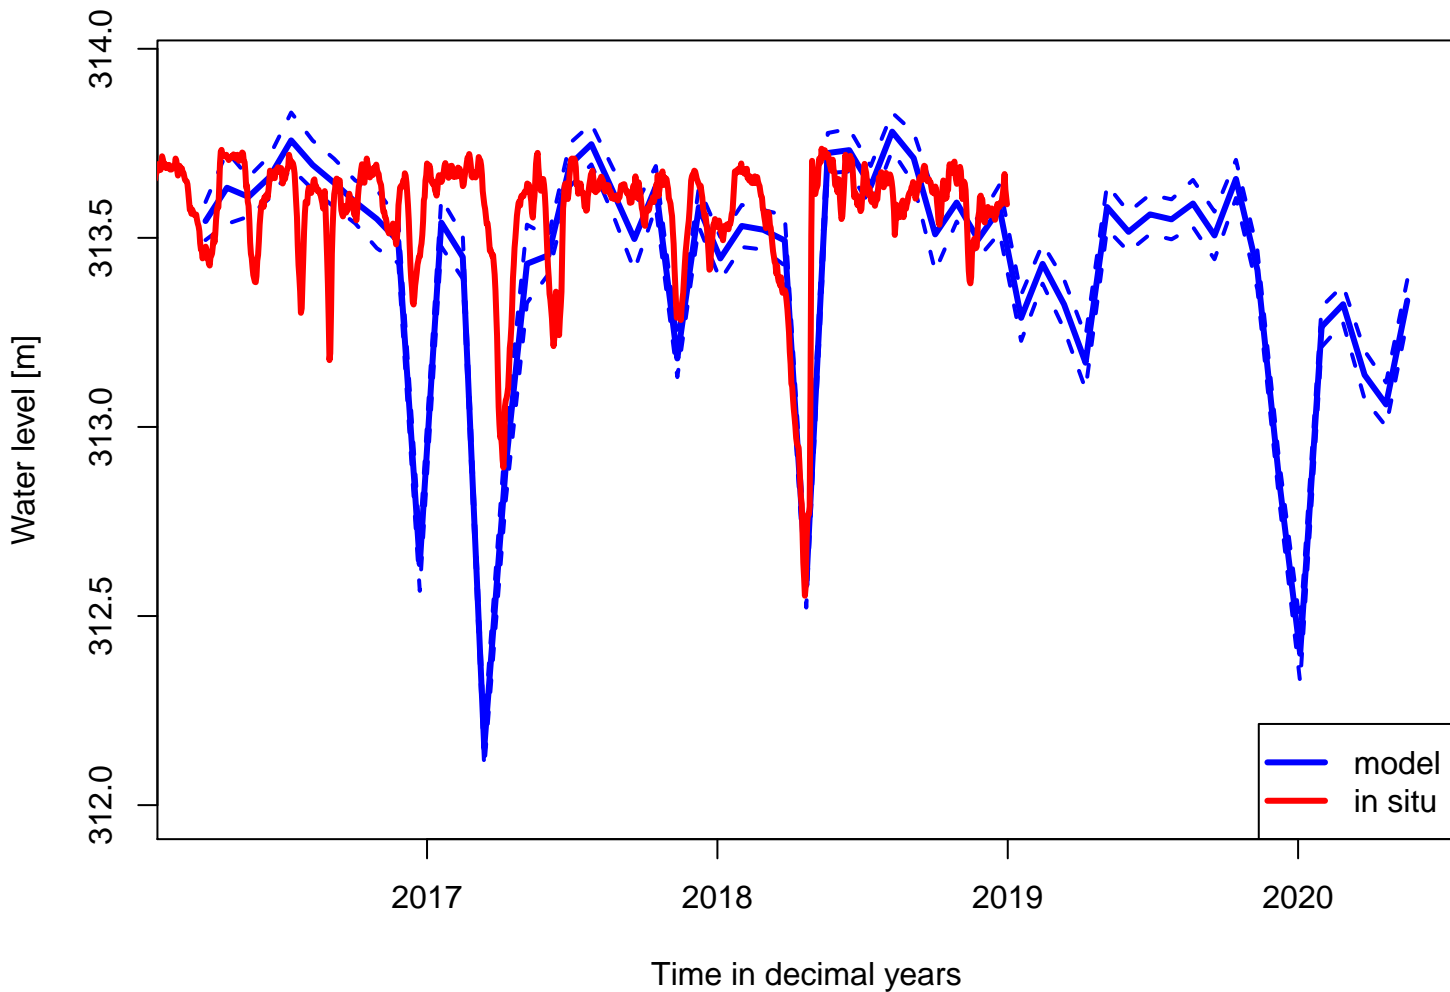

Supplement: s1 [file s1]

**lakename: Kluane lakeid: 363 lat: 61.05 lon: -138.5**

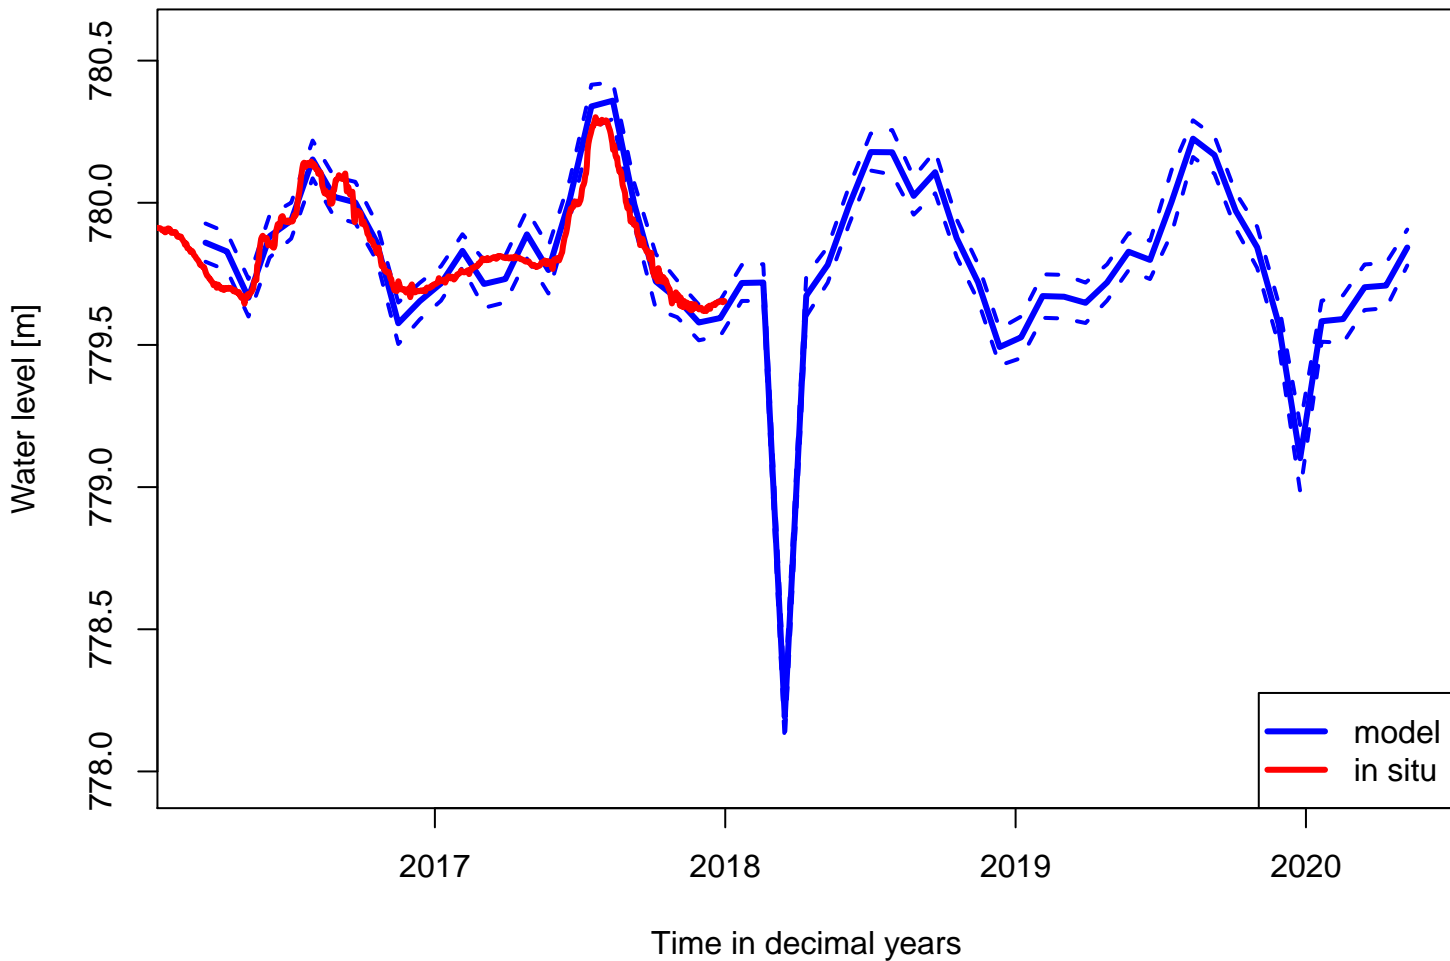

Supplement: s1 [file s1]

**lakename: Point lakeid: 278 lat: 65.4 lon: -114**

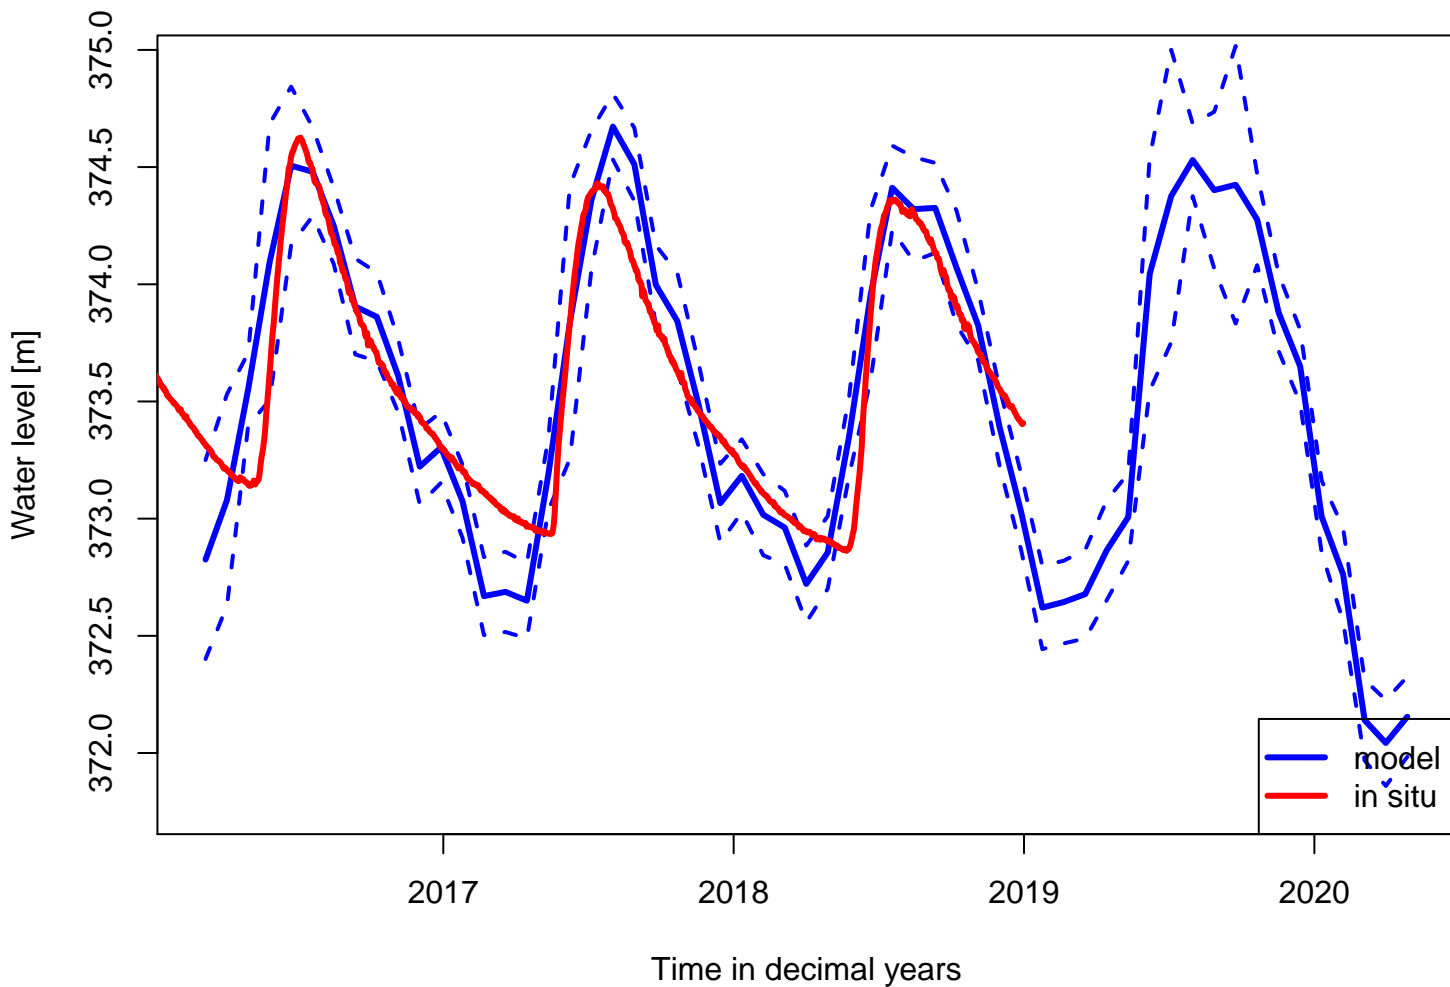

Supplement: s1 [file s1]

**lakename: lakeid: 7175 lat: 52.49 lon: -105**

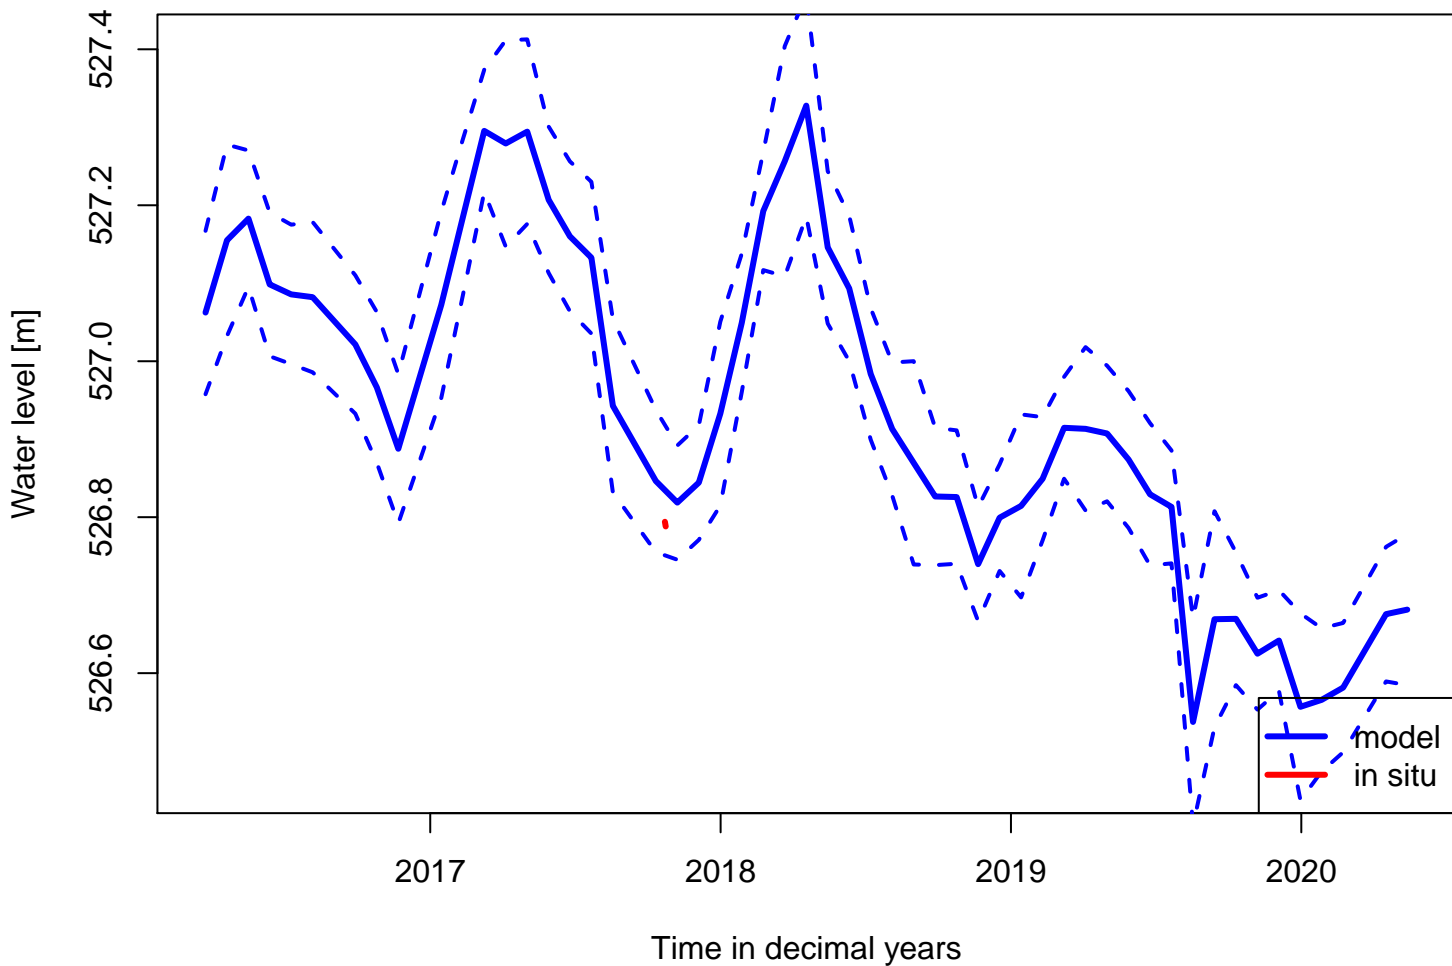

Supplement: s1 [file s1]

**lakename: Sacandaga Reservoir lakeid: 9074 lat: 43.32 lon: -73.93**

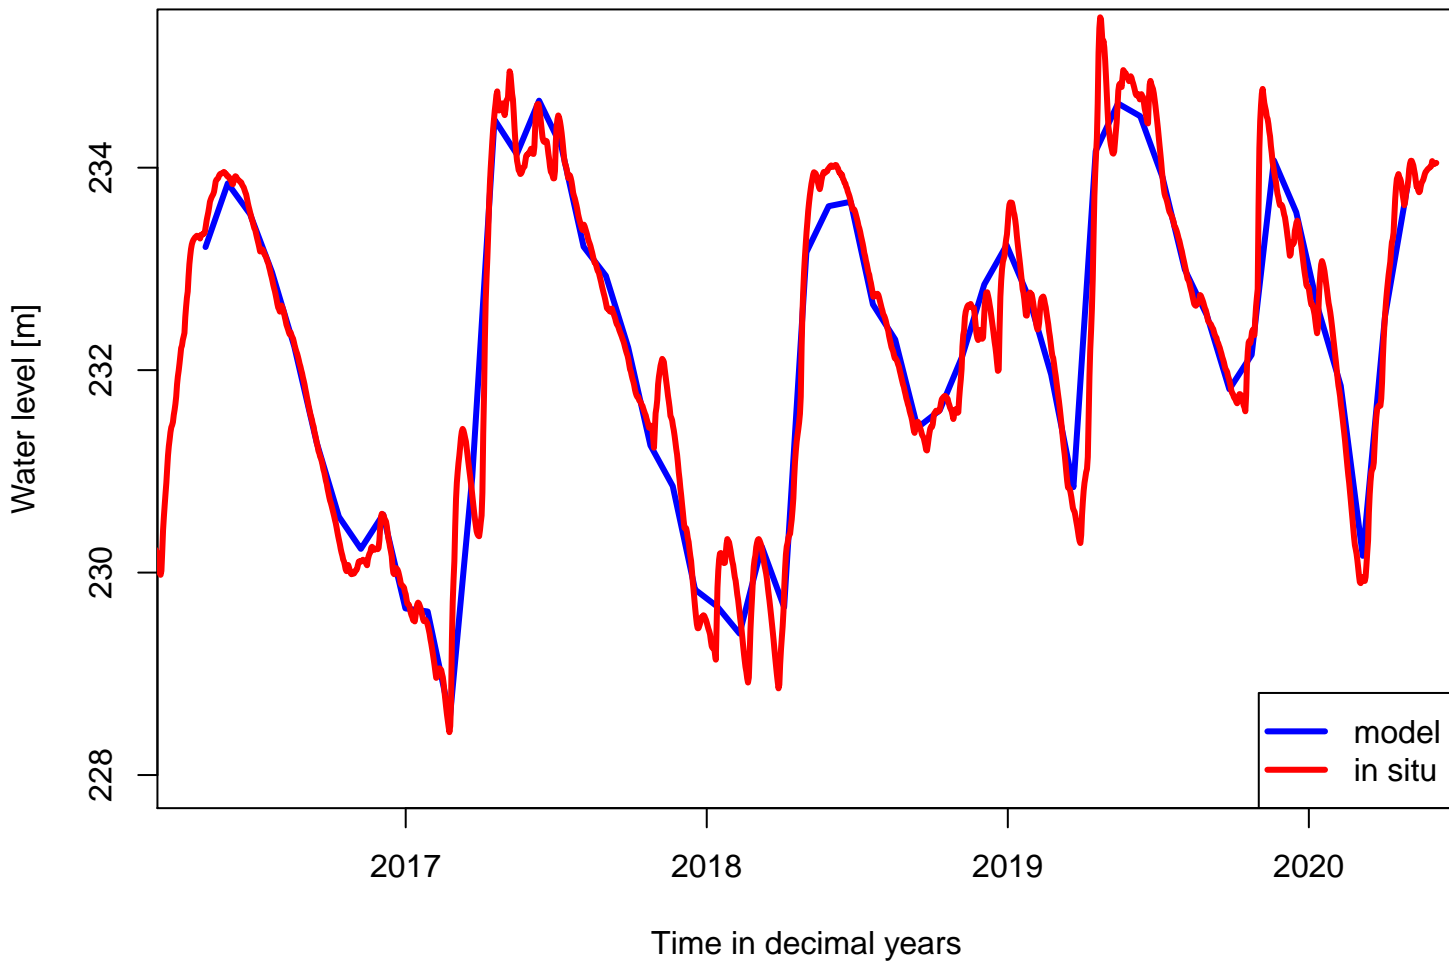

Supplement: s1 [file s1]

**lakename: Manitoba lakeid: 53 lat: 51.44 lon: -98.8**

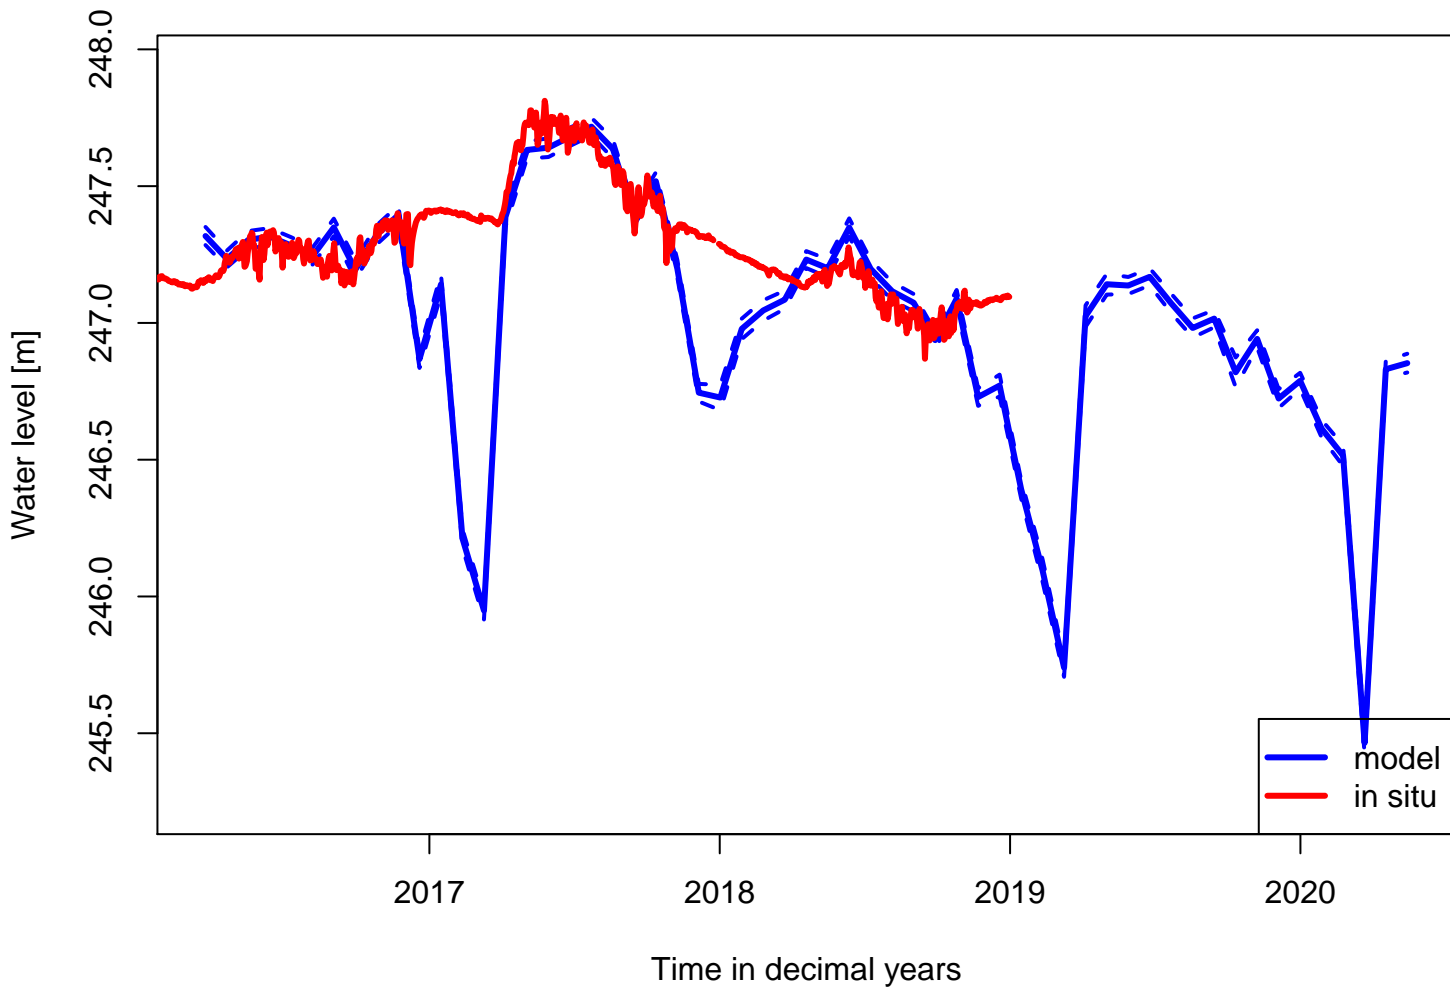

Supplement: s1 [file s1]

**lakename: lakeid: 4762 lat: 59.95 lon: -134.3**

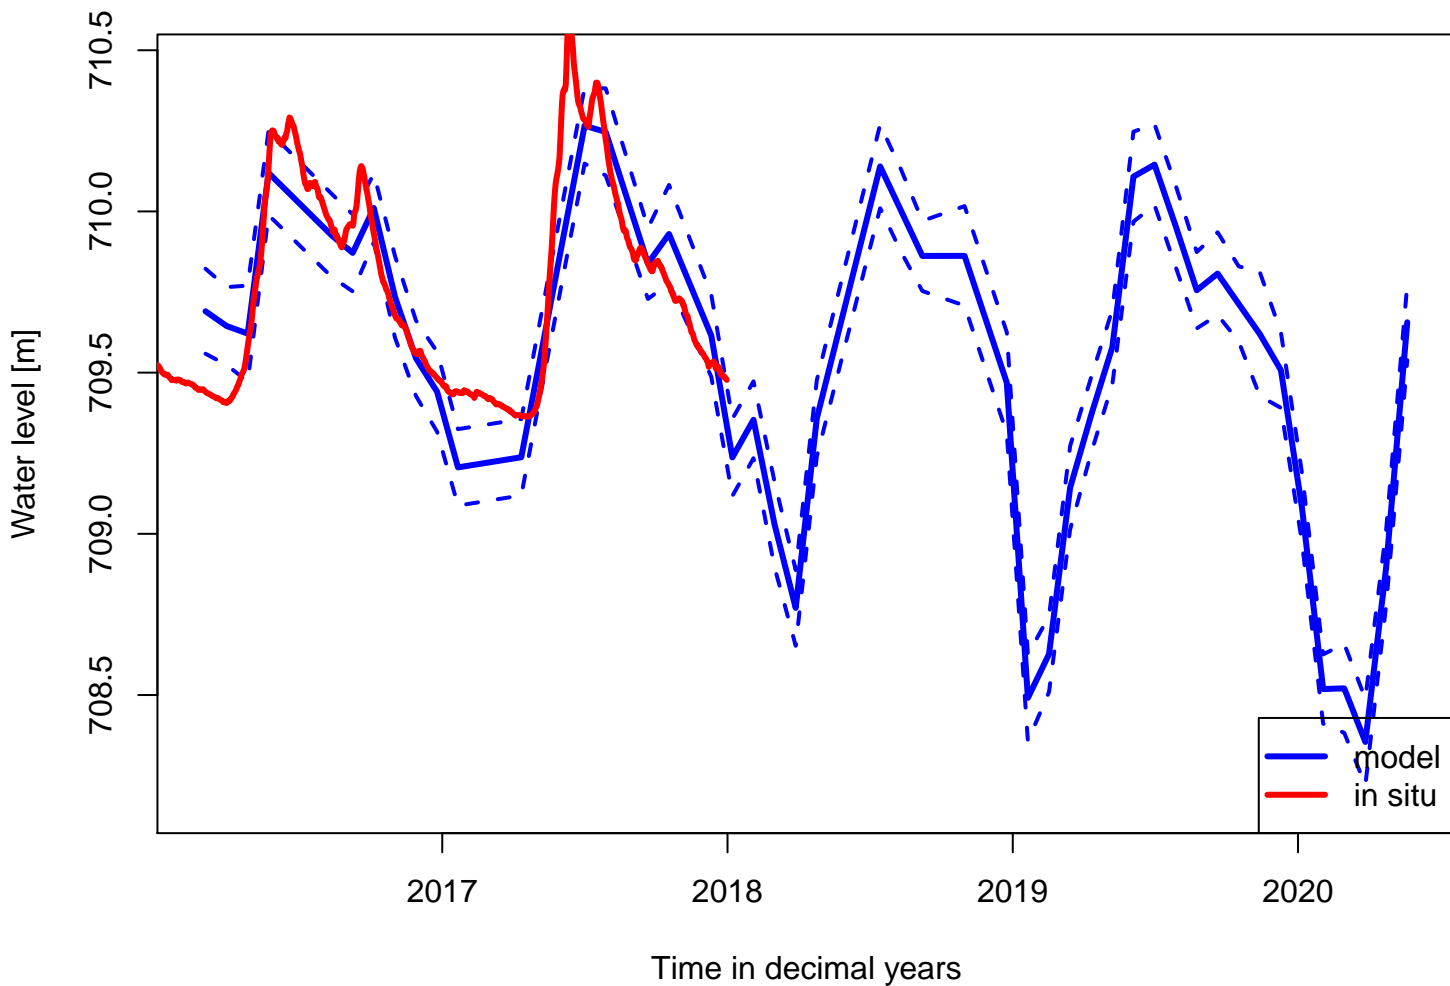

Supplement: s1 [file s1]

**lakename: Diefenbaker lakeid: 643 lat: 51.28 lon: -106.8**

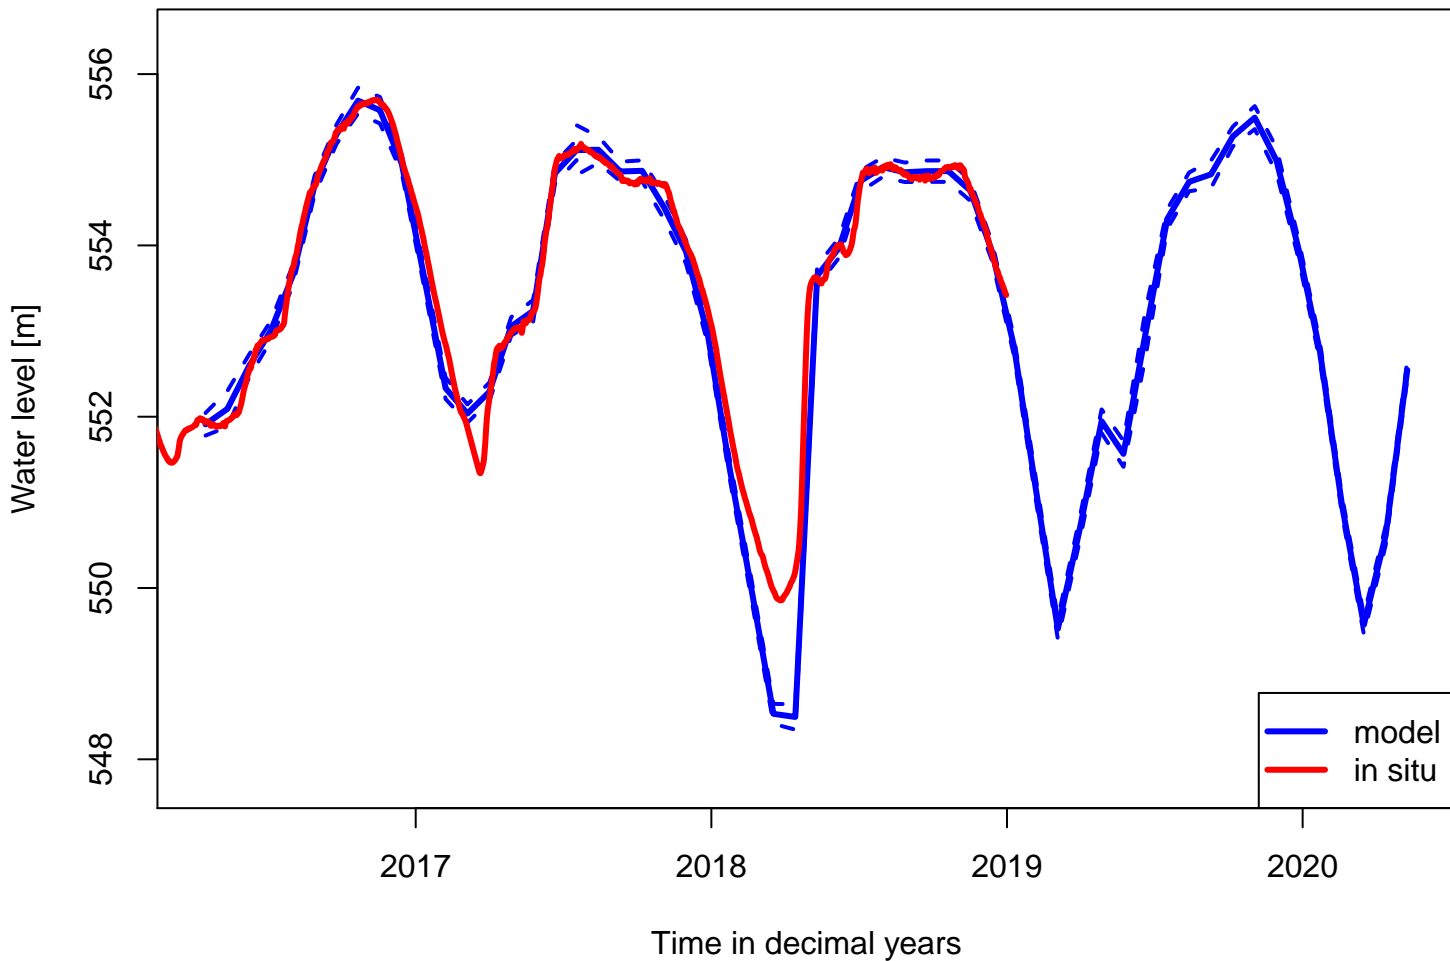

Supplement: s1 [file s1]

**lakename: Point lakeid: 278 lat: 65.4 lon: -114**

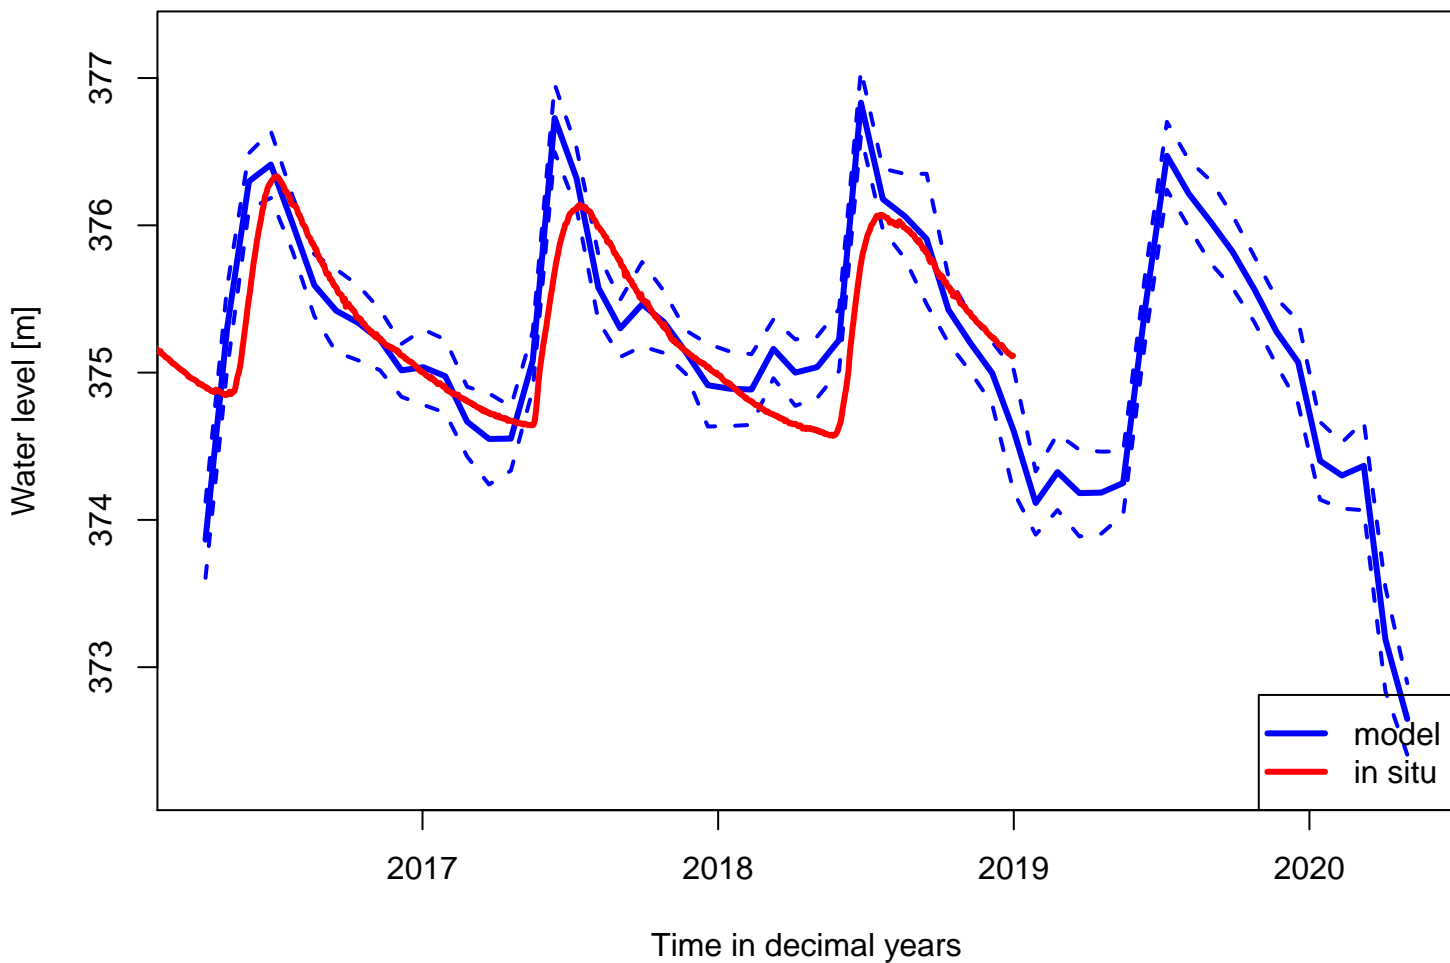

Supplement: s1 [file s1]

**lakename: lakeid: 6846 lat: 53.49 lon: -91.51**

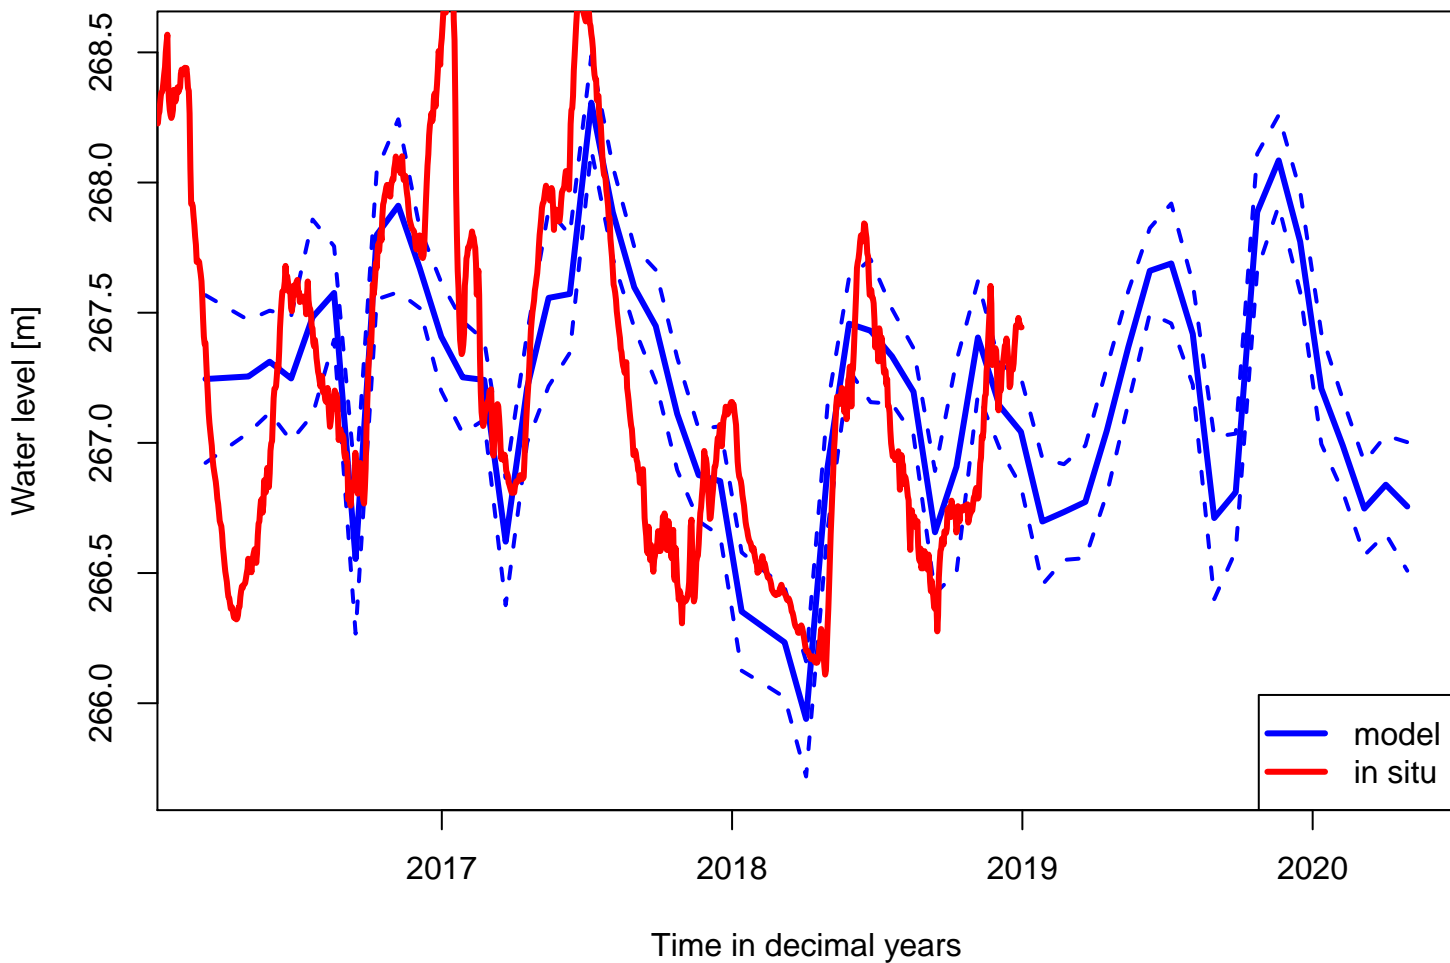

Supplement: s1 [file s1]

**lakename: lakeid: 8822 lat: 45.57 lon: -67.43**

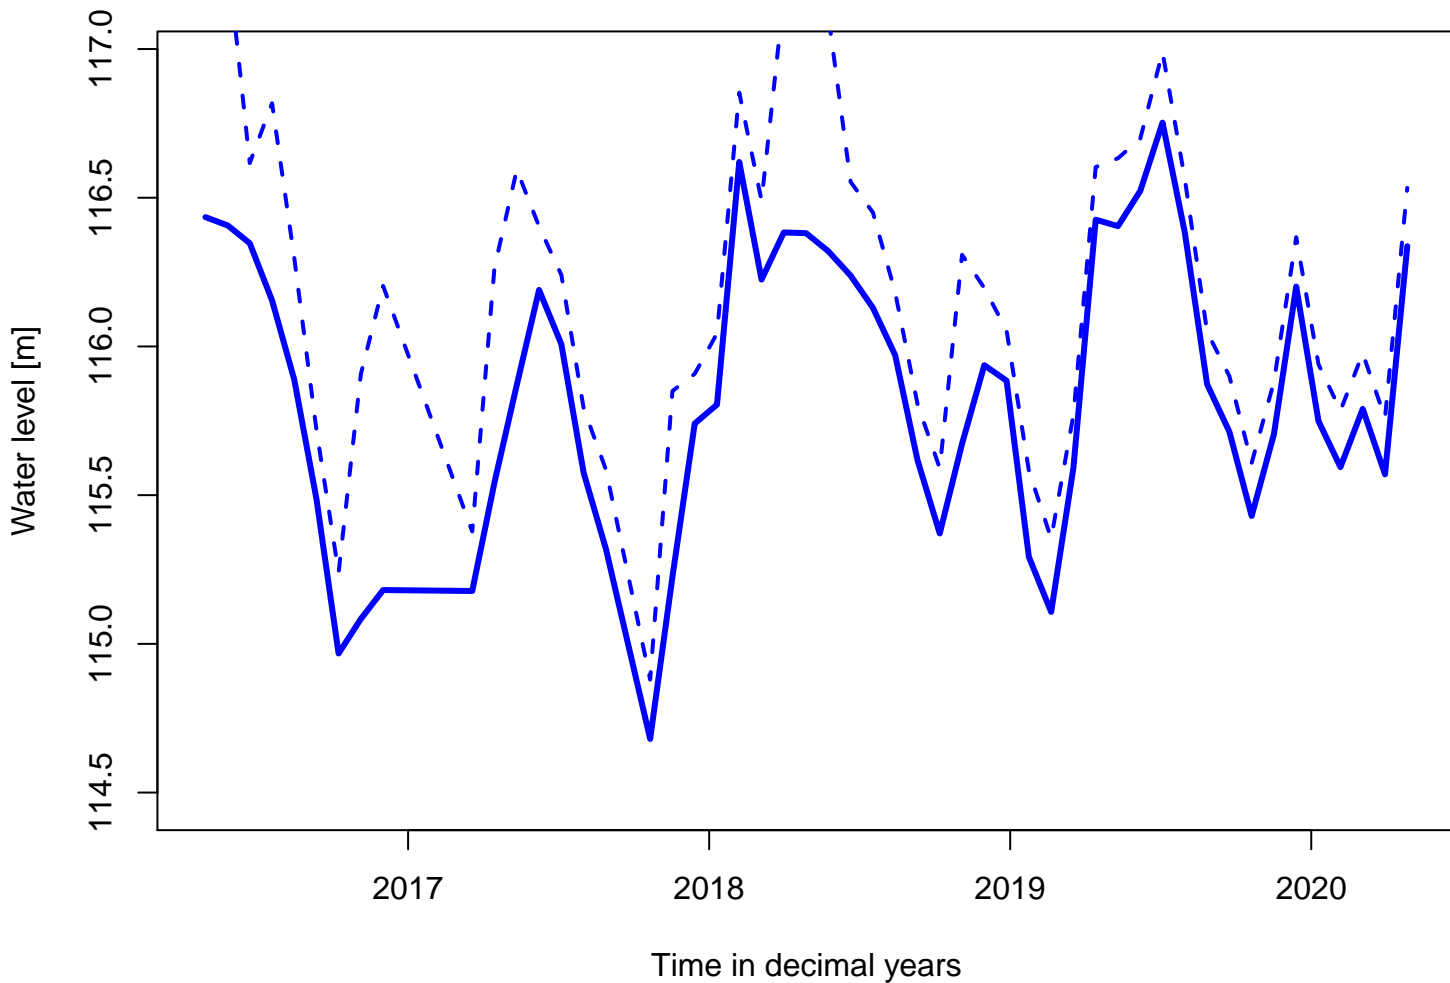

Supplement: s1 [file s1]

**lakename: Lake Mohave lakeid: 9360 lat: 35.2 lon: -114.6**

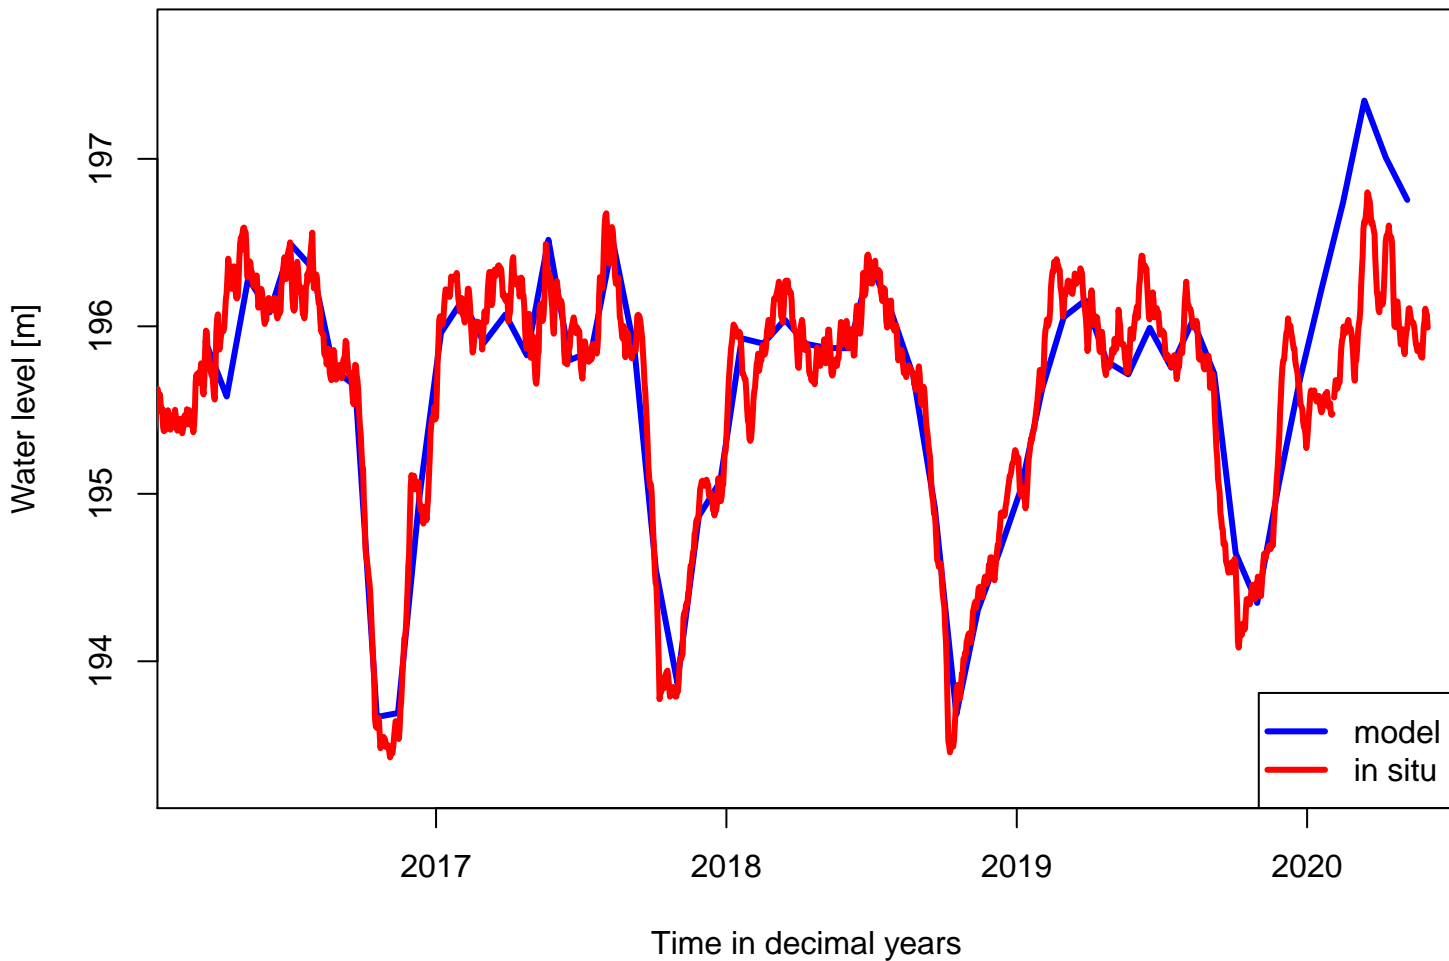

Supplement: s1 [file s1]

**lakename: Franklin D. Roosevelt lakeid: 724 lat: 47.96 lon: -119**

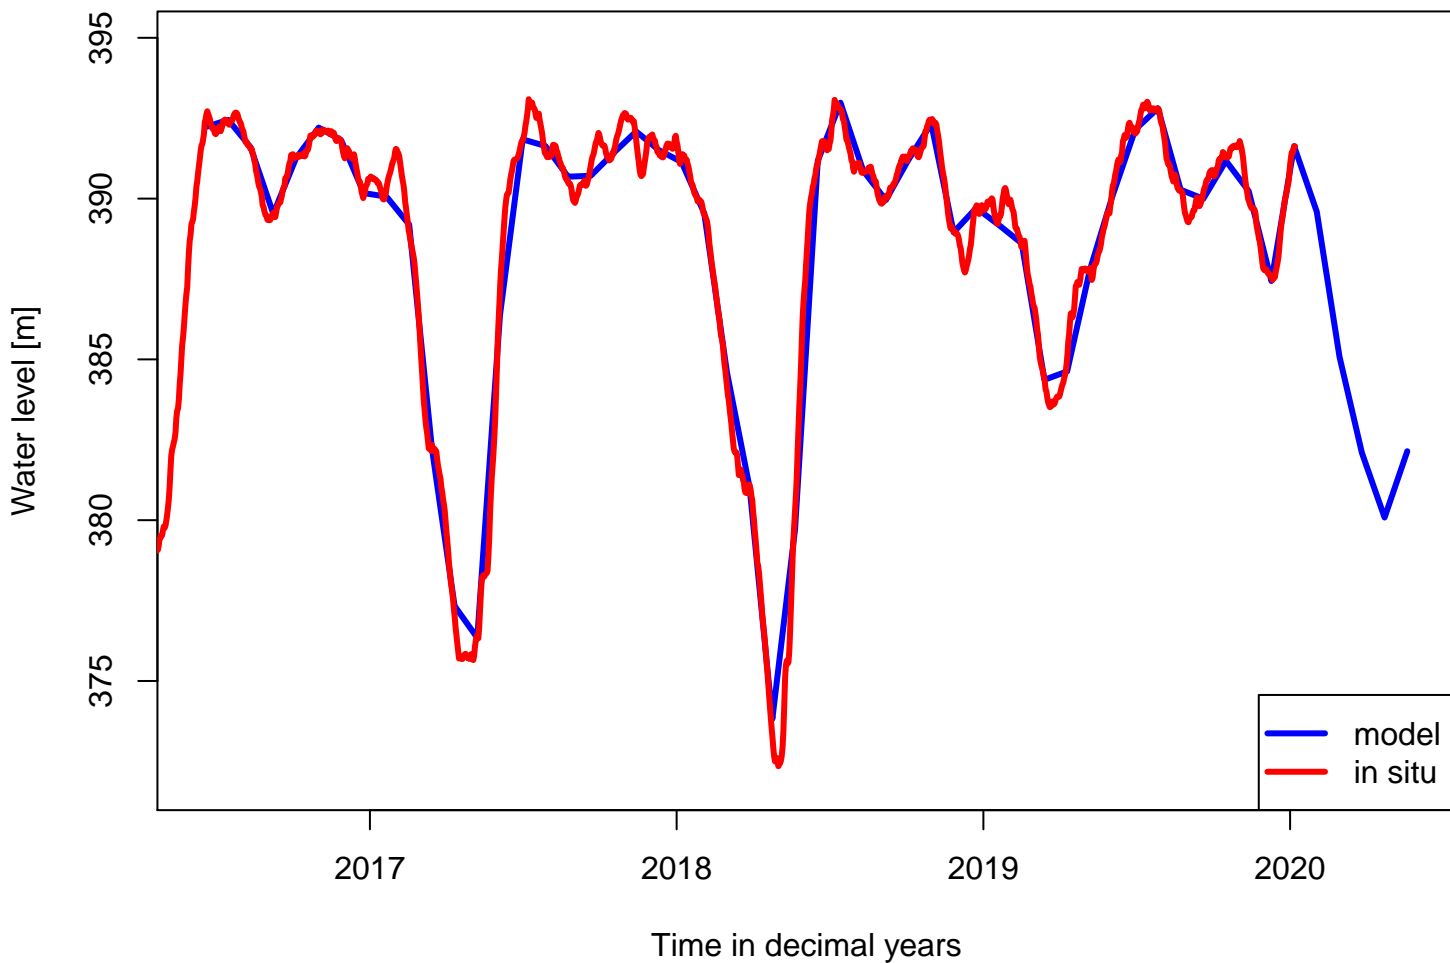

Supplement: s1 [file s1]

**lakename: lakeid: 377 lat: 60.94 lon: -117.4**

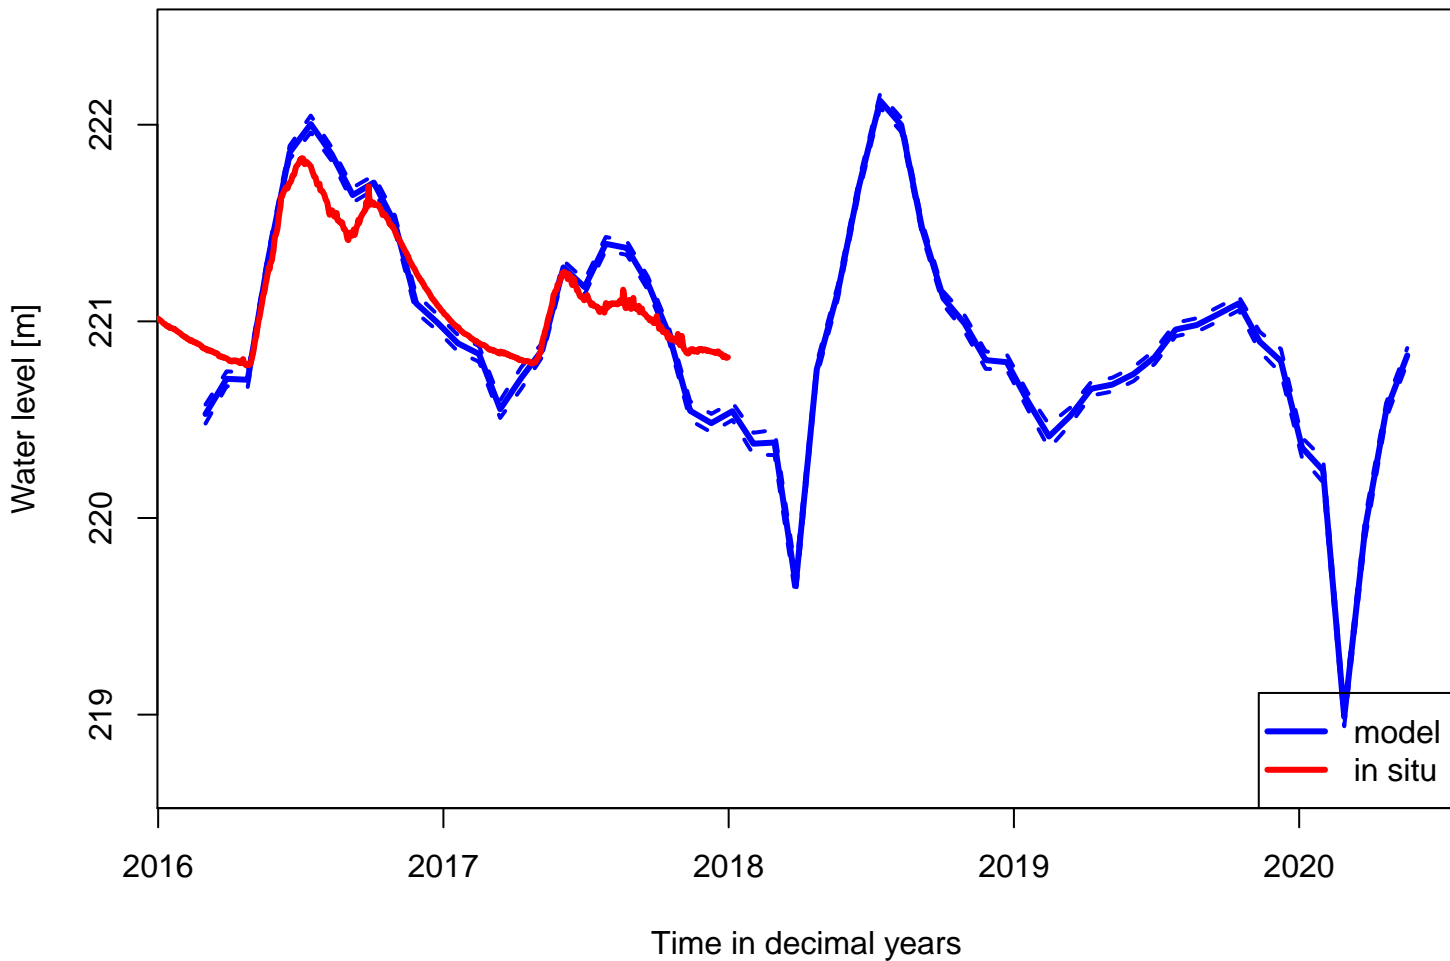

Supplement: s1 [file s1]

**lakename: Nipissing lakeid: 745 lat: 46.31 lon: -79.47**

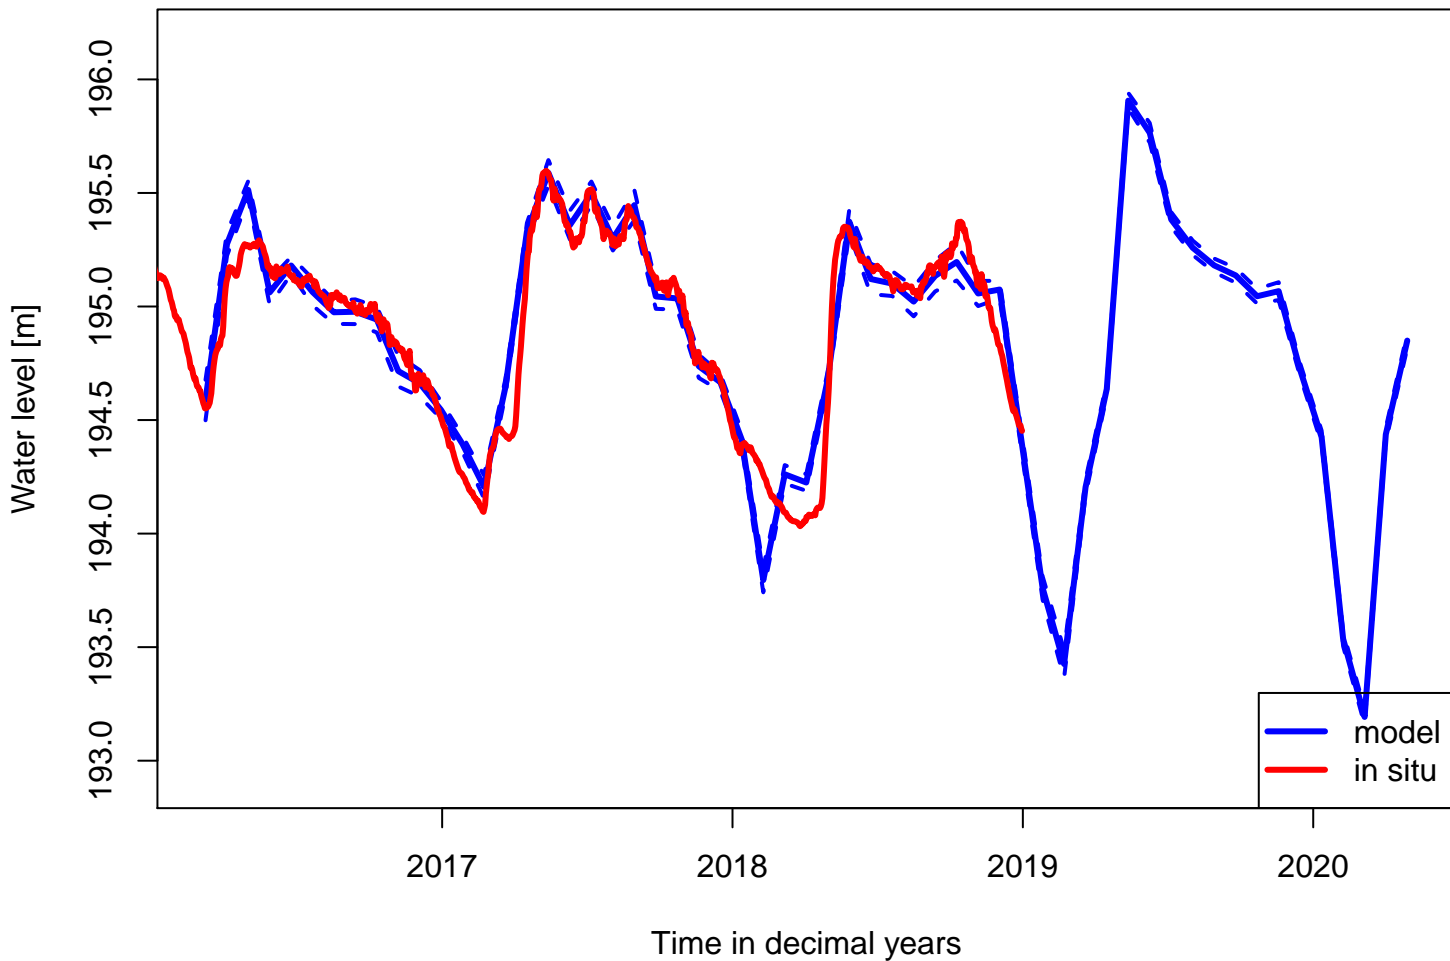

Supplement: s1 [file s1]

**lakename: Babine lakeid: 517 lat: 55.32 lon: -126.6**

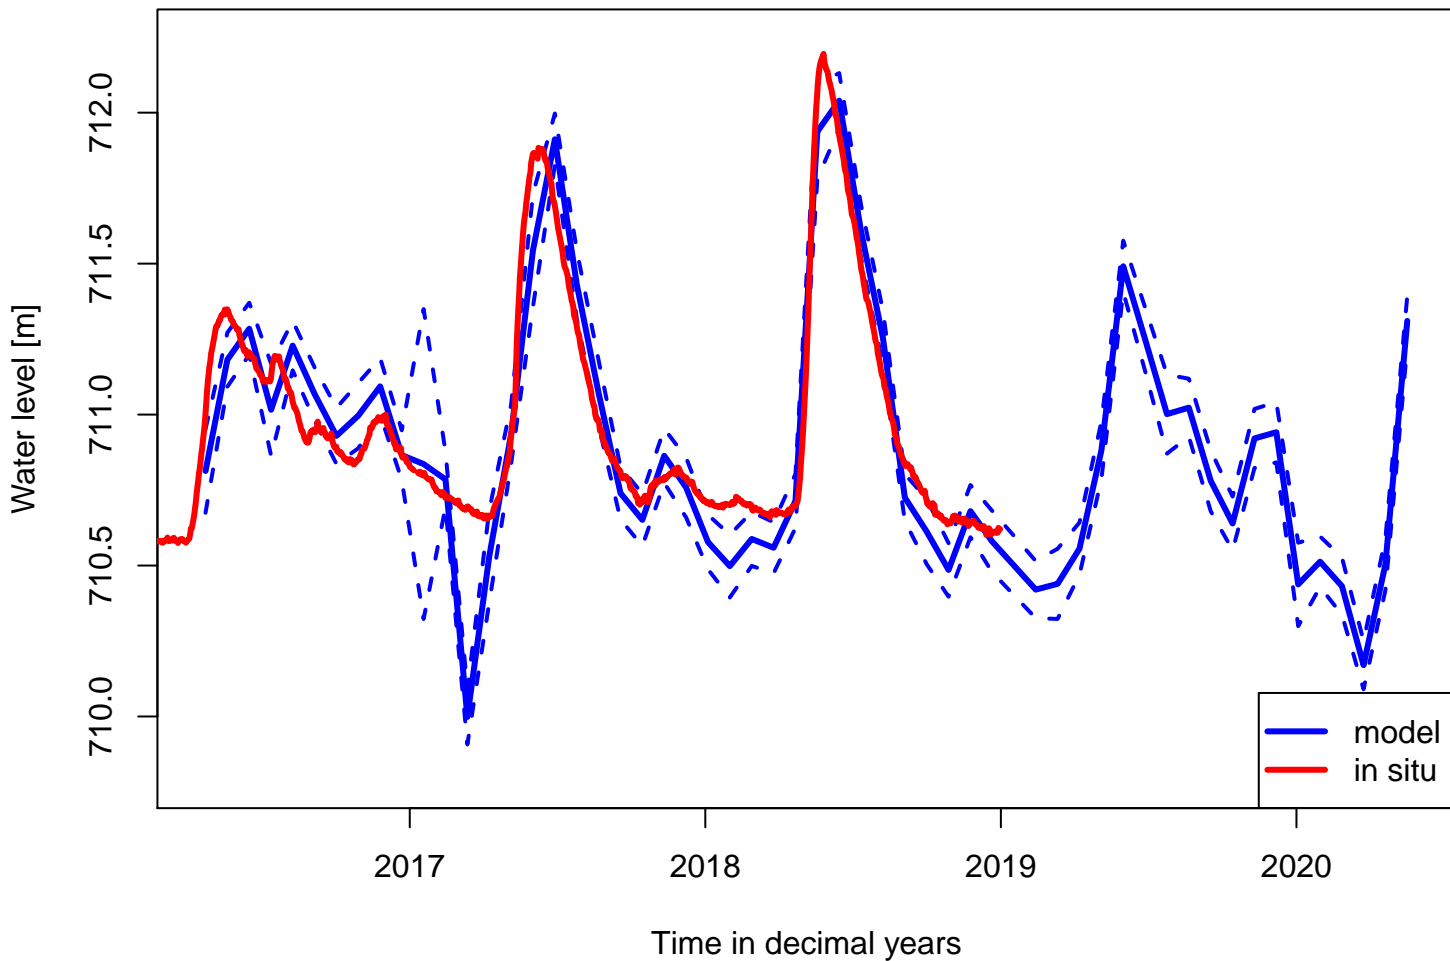

Supplement: s1 [file s1]

**lakename: Adams lakeid: 651 lat: 50.94 lon: -119.7**

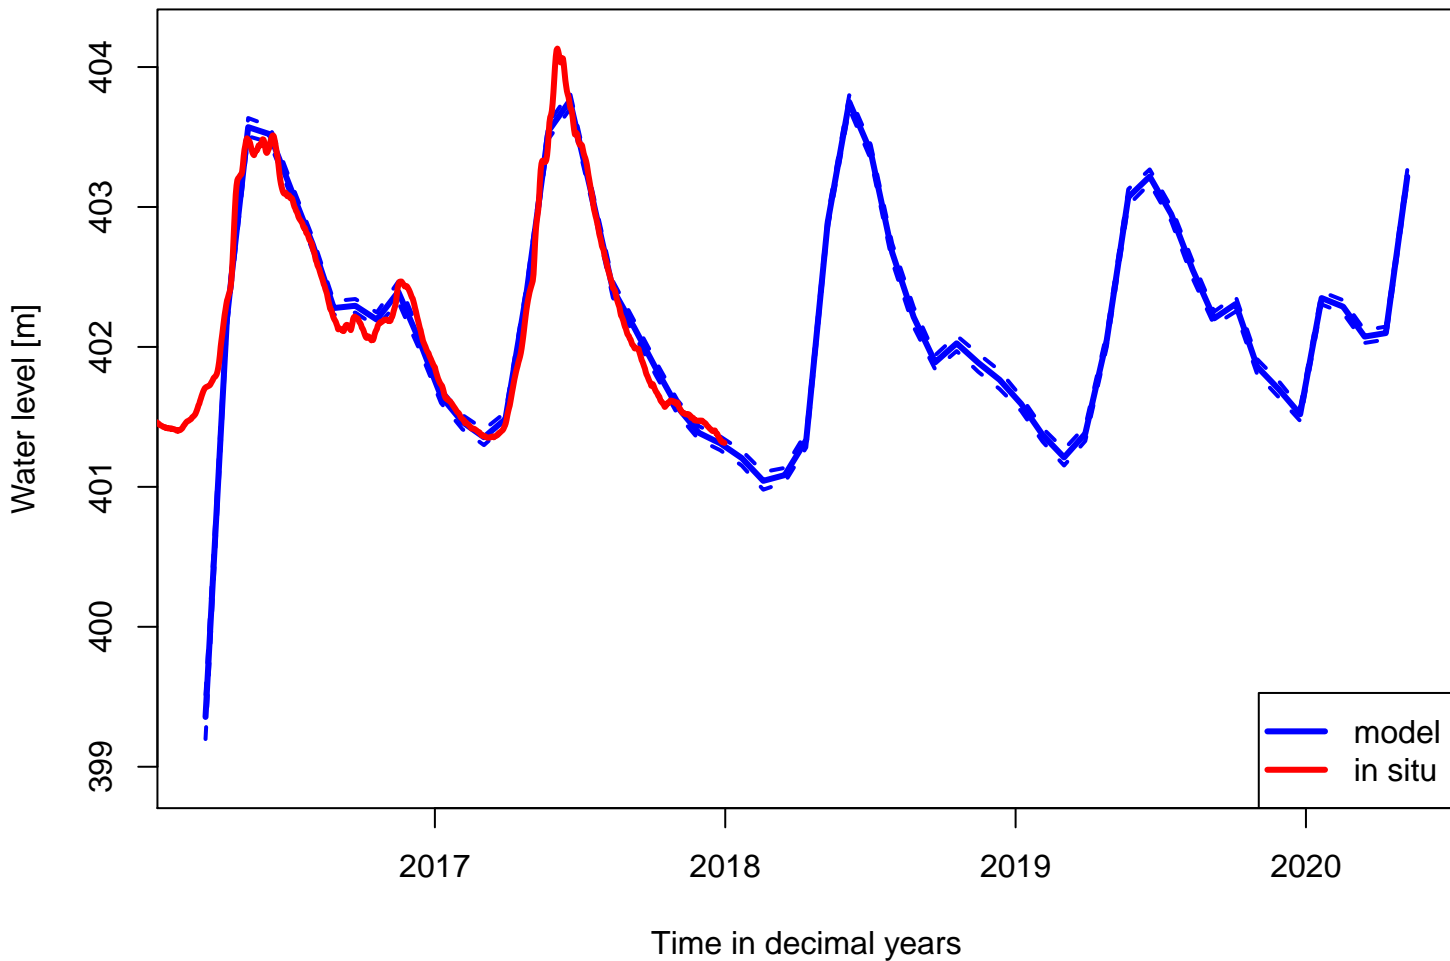

Supplement: s1 [file s1]

**lakename: Pigeon lakeid: 7014 lat: 53.02 lon: -114.1**

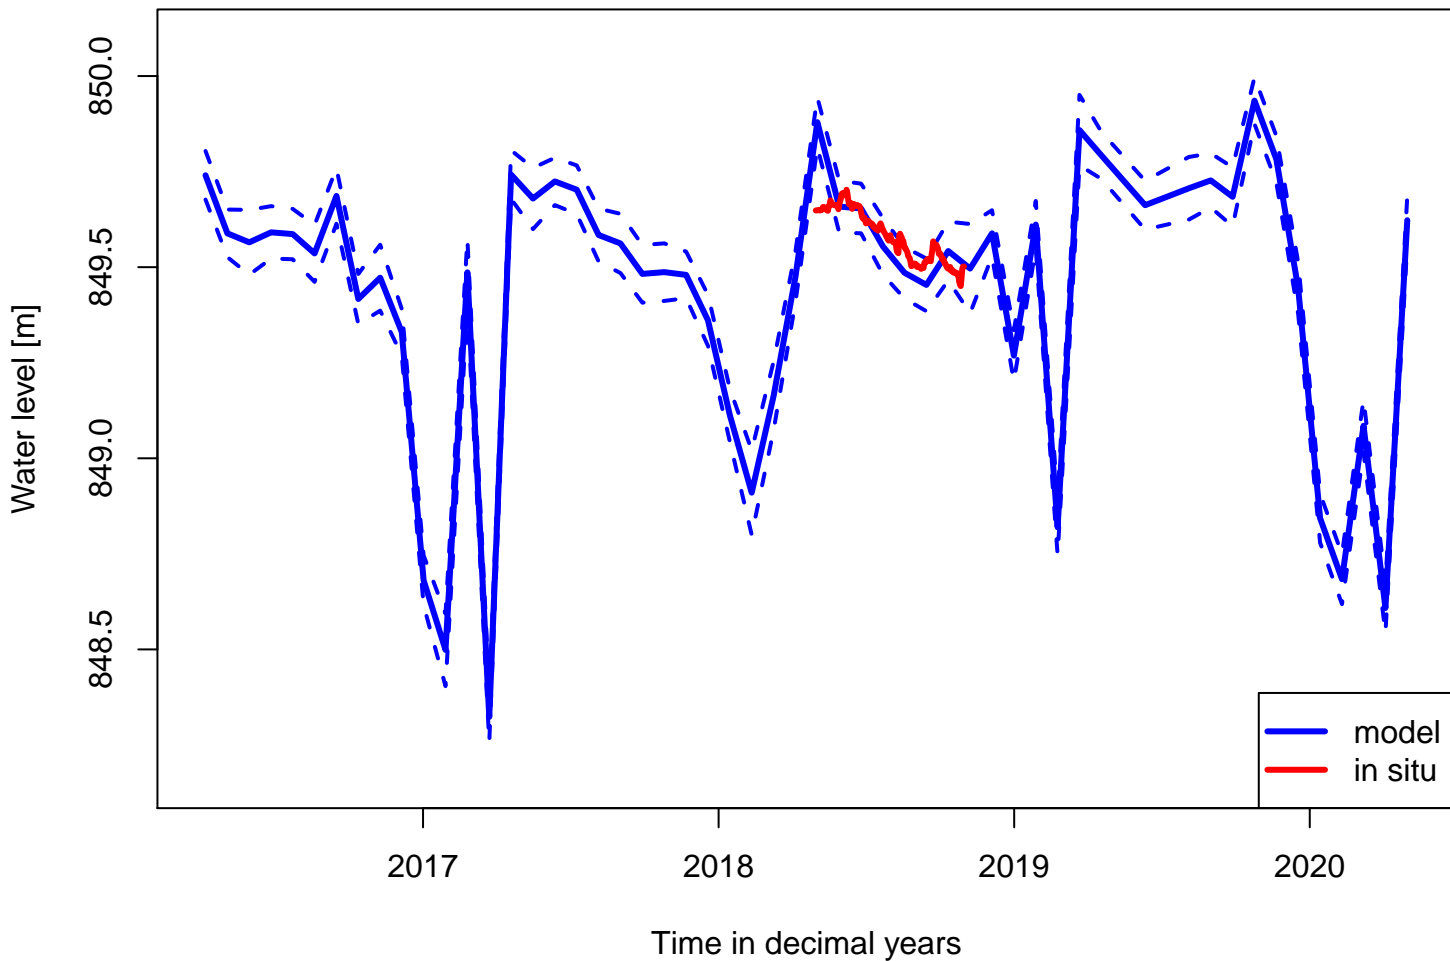

Supplement: s1 [file s1]

**lakename: Notigi Reservoir lakeid: 462 lat: 55.87 lon: -99.33**

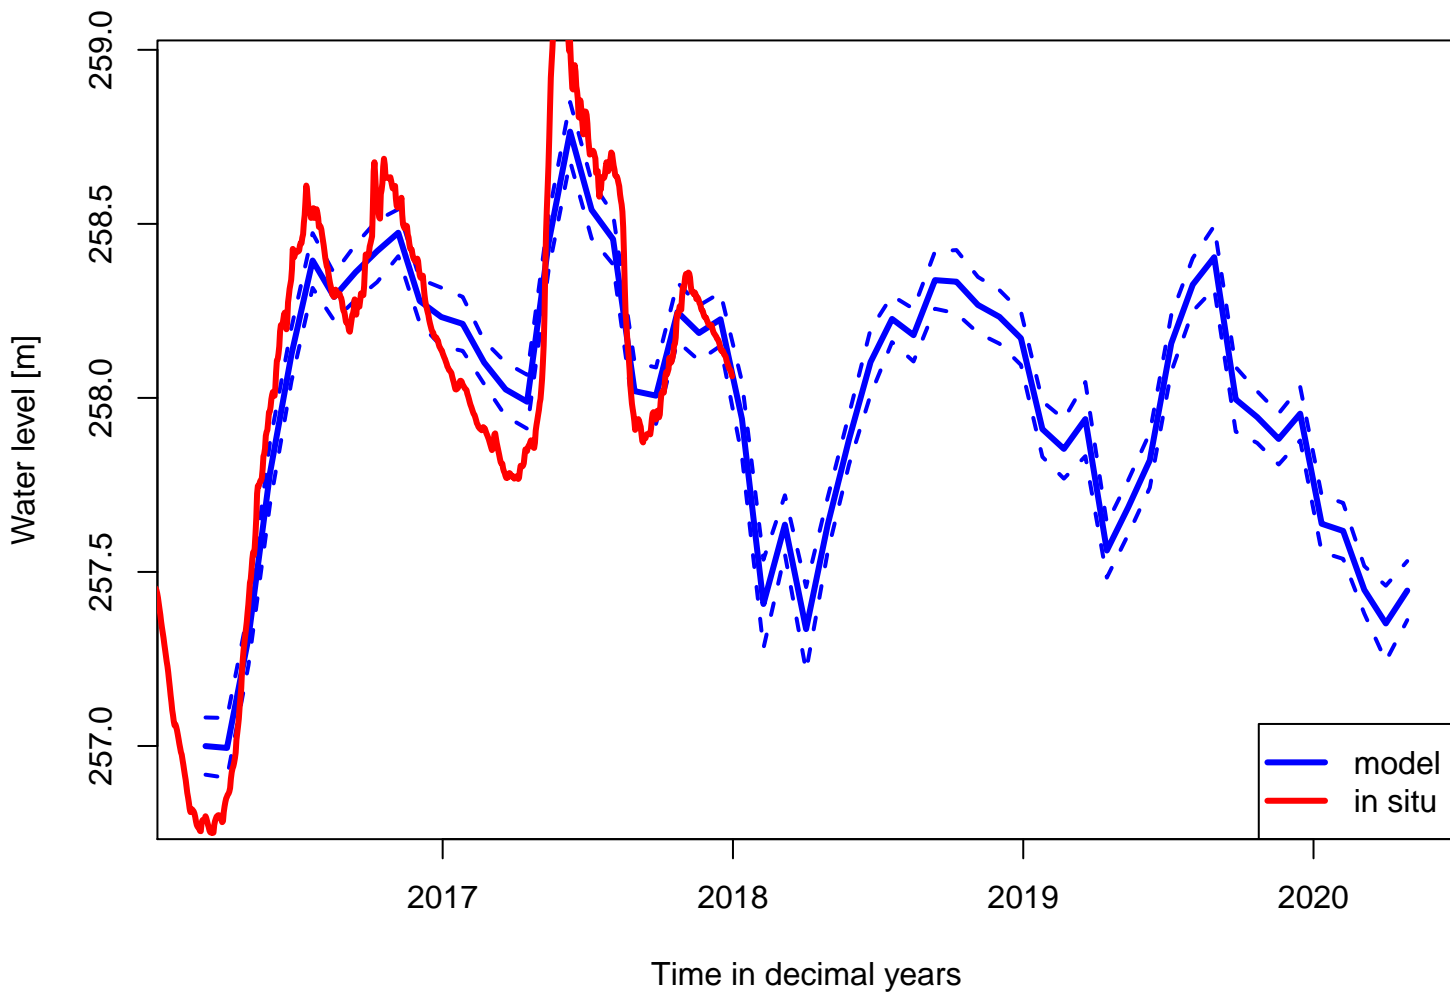

Supplement: s1 [file s1]

**lakename: Woods lakeid: 57 lat: 49.33 lon: -94.85**

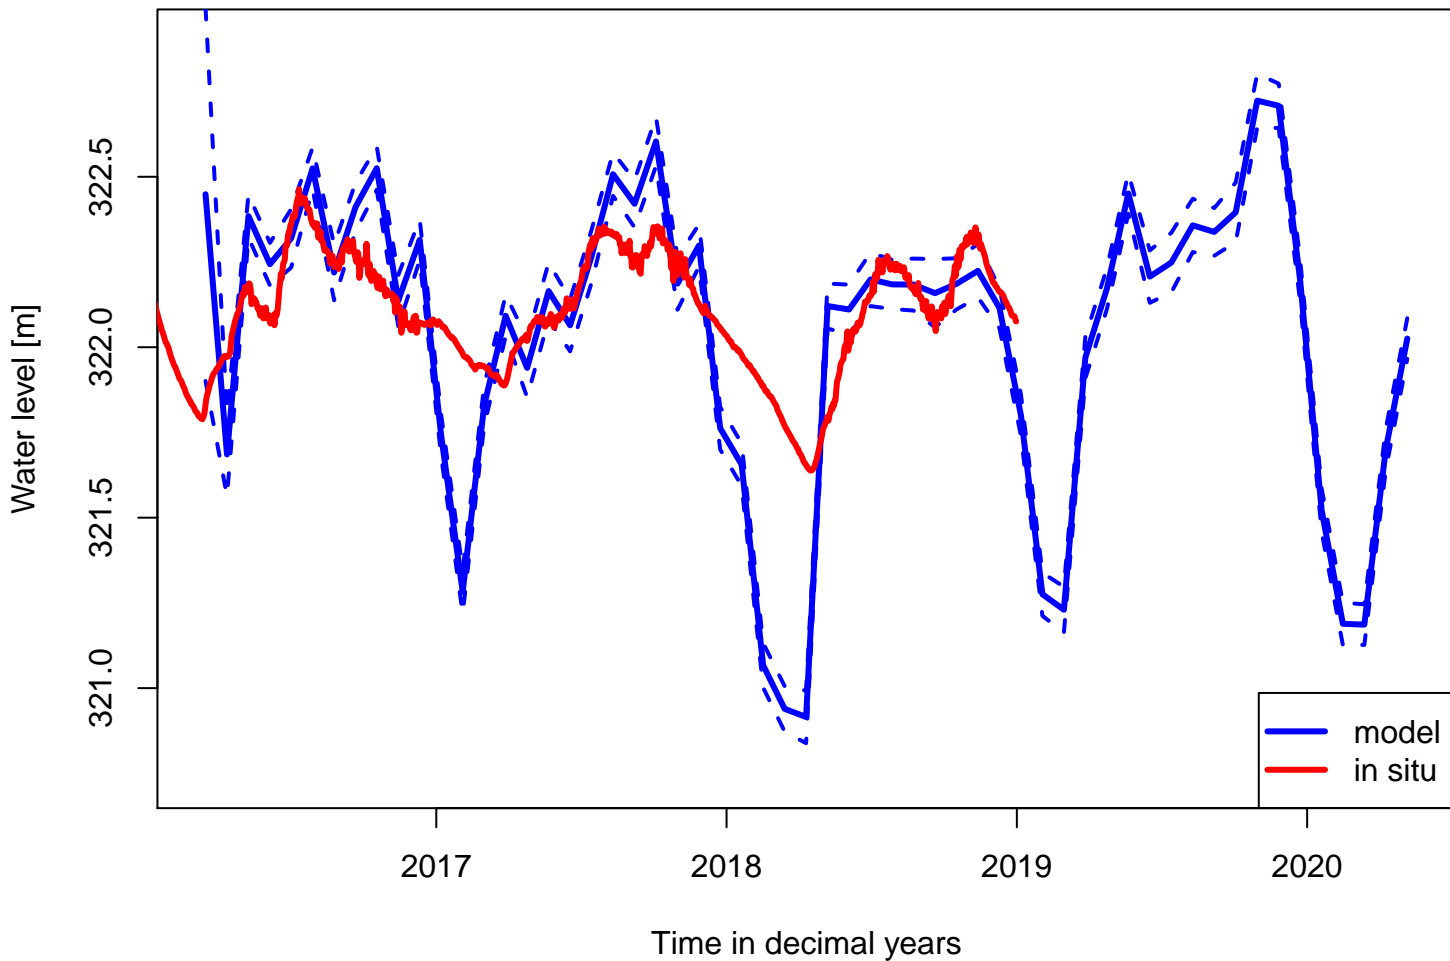

Supplement: s1 [file s1]

**lakename: Okeechobee lakeid: 69 lat: 26.95 lon: -80.83**

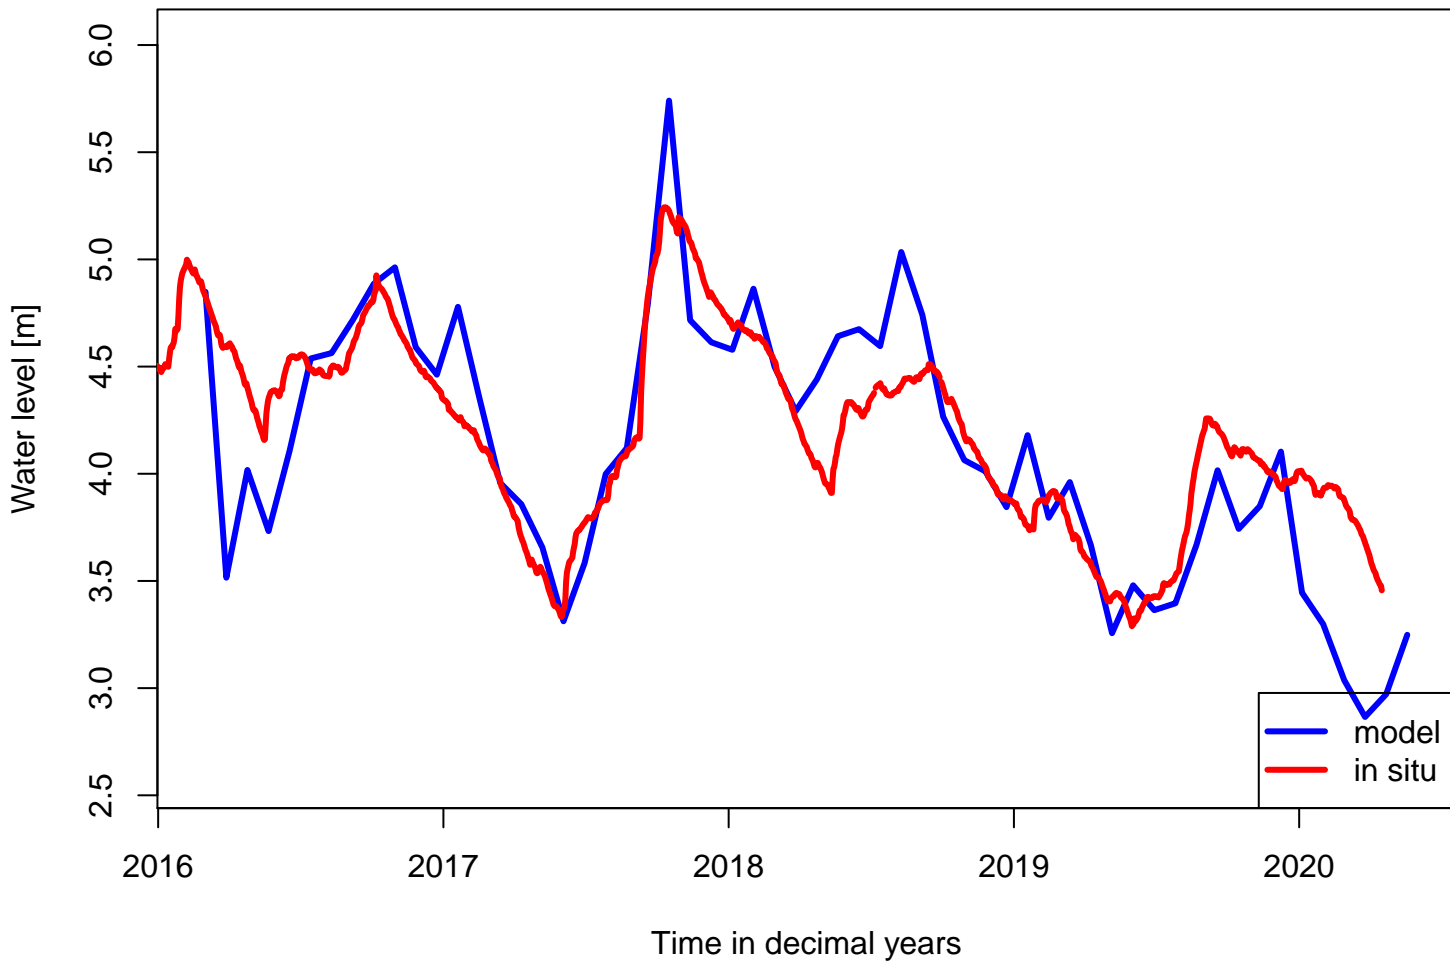

Supplement: s1 [file s1]

**lakename: Timiskaming lakeid: 737 lat: 47.45 lon: -79.63**

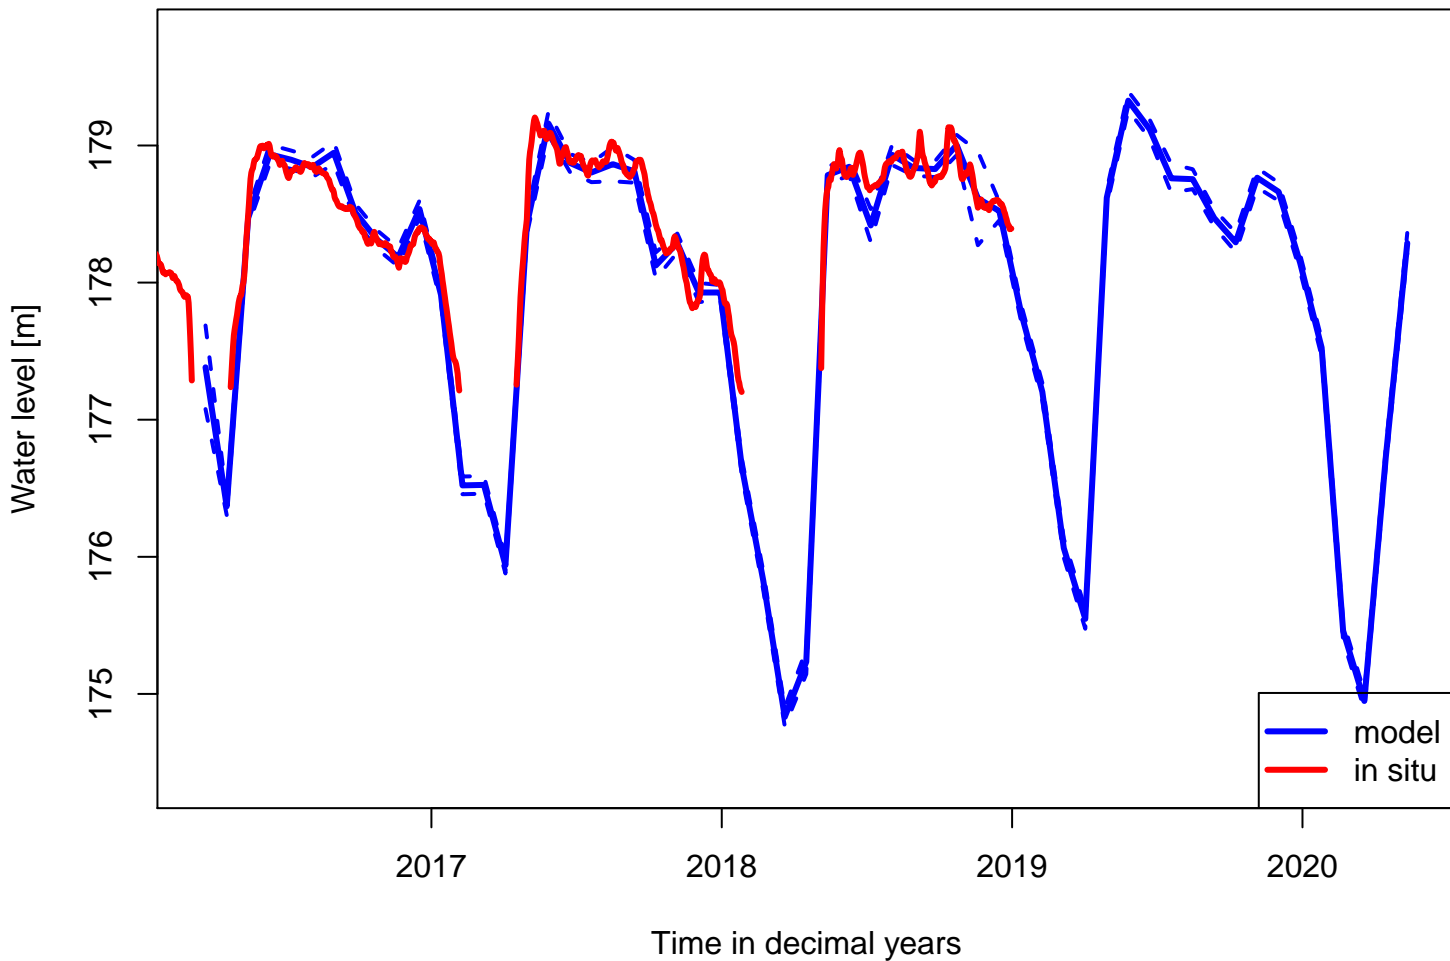

Supplement: s1 [file s1]

**lakename: Okanagan lakeid: 695 lat: 49.89 lon: -119.5**

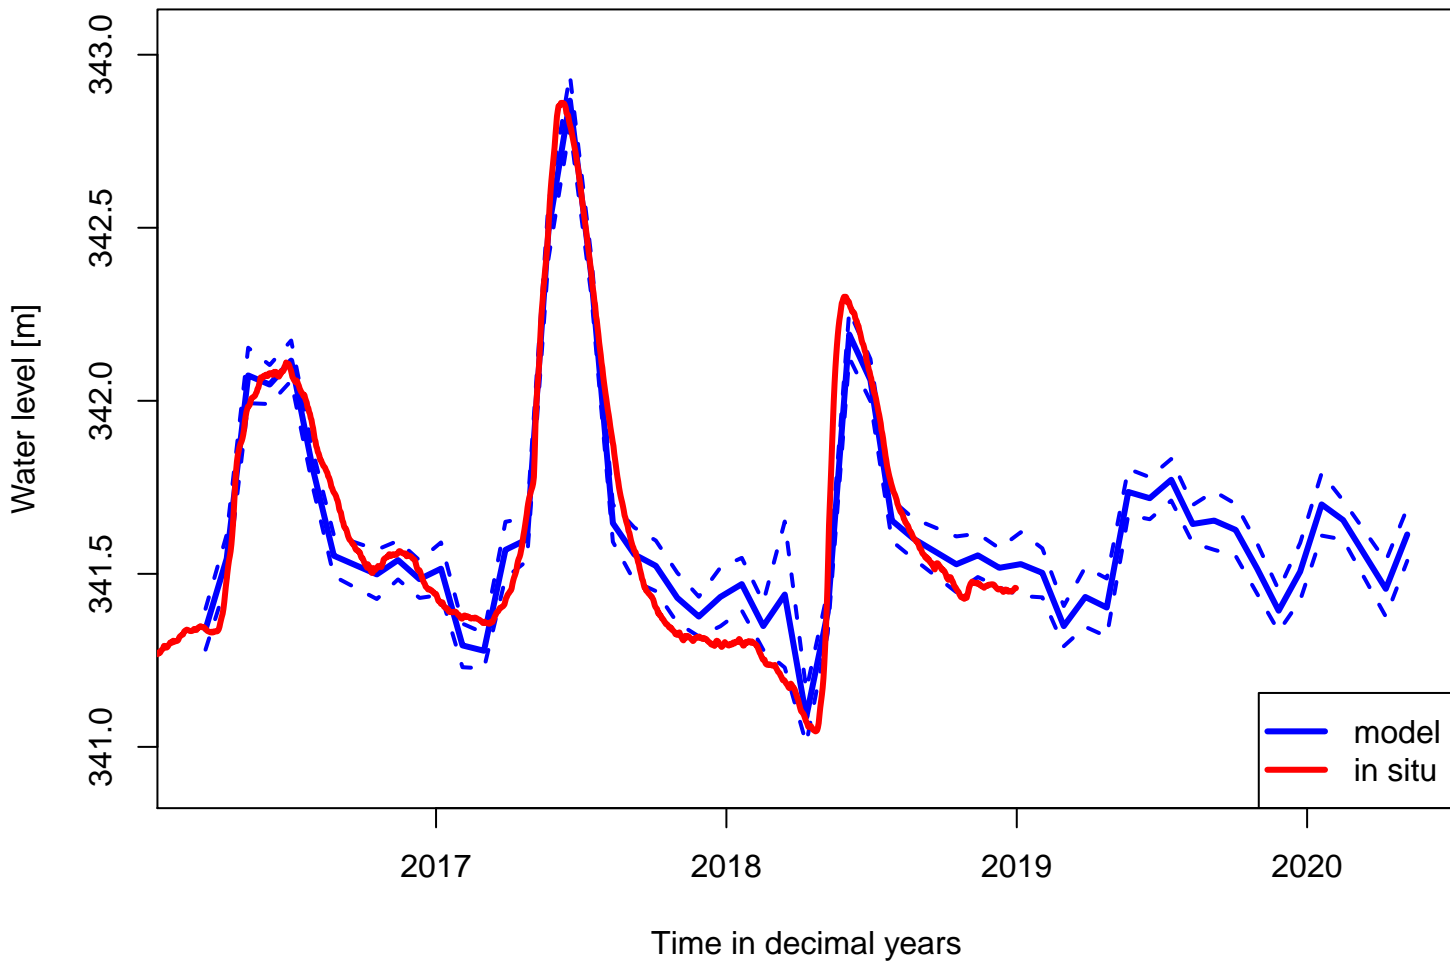

Supplement: s1 [file s1]
