# Supplementary material (part 2 of 5)
Source: MDPI journal article supplement (https://www.mdpi.com/2072-4292/12/17/2835)

**lakename: Winnipegosis lakeid: 52 lat: 52.97 lon: -101**

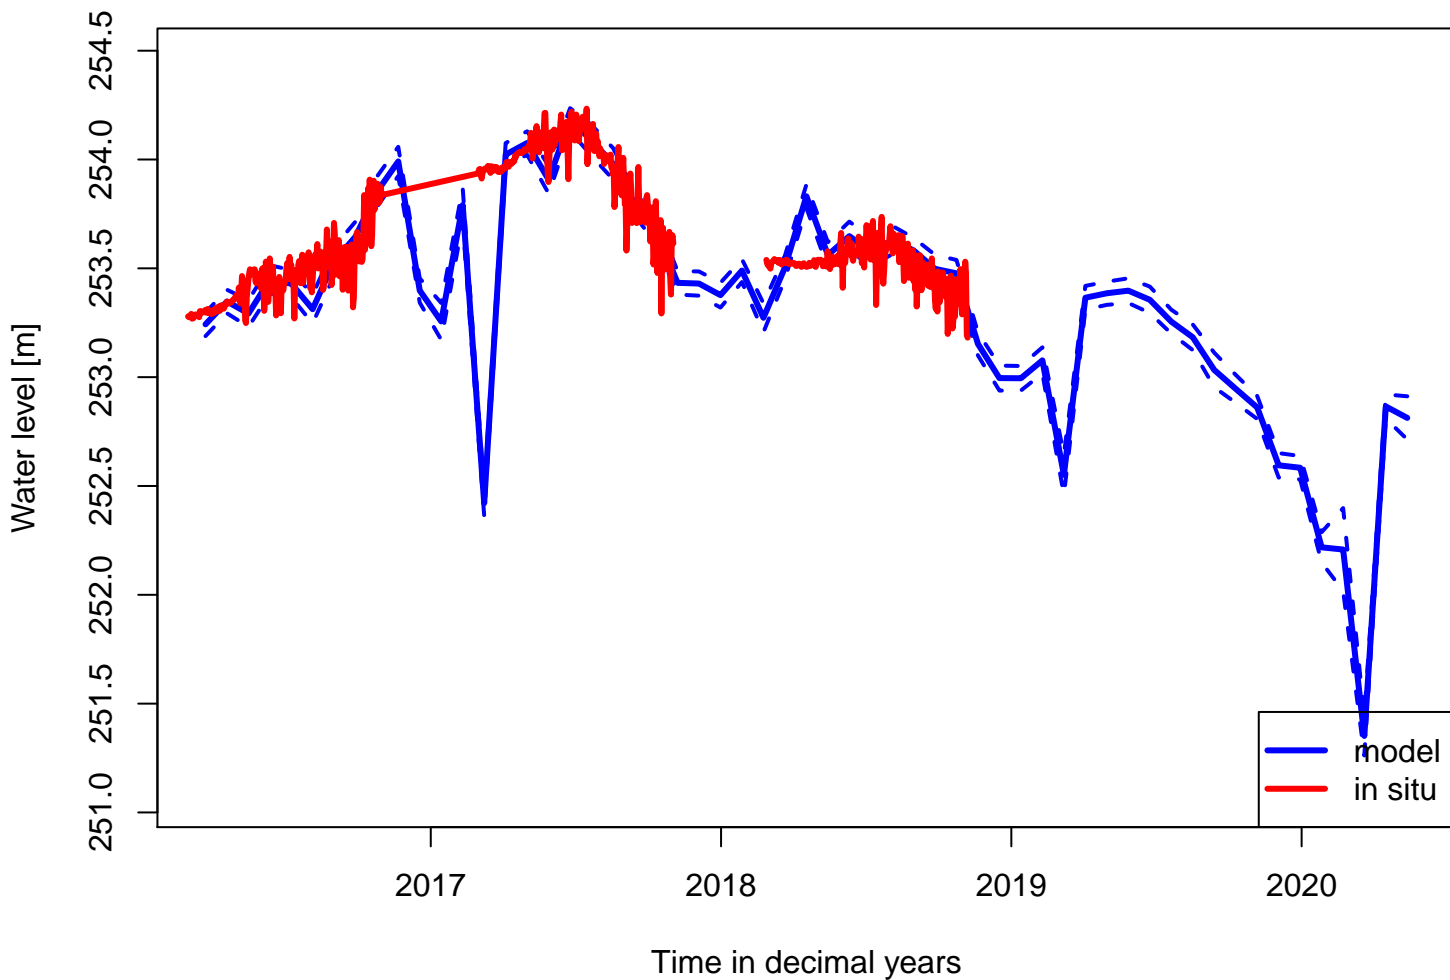

Supplement: s1 [file s1]

**lakename: Tobin lakeid: 589 lat: 53.66 lon: -103.4**

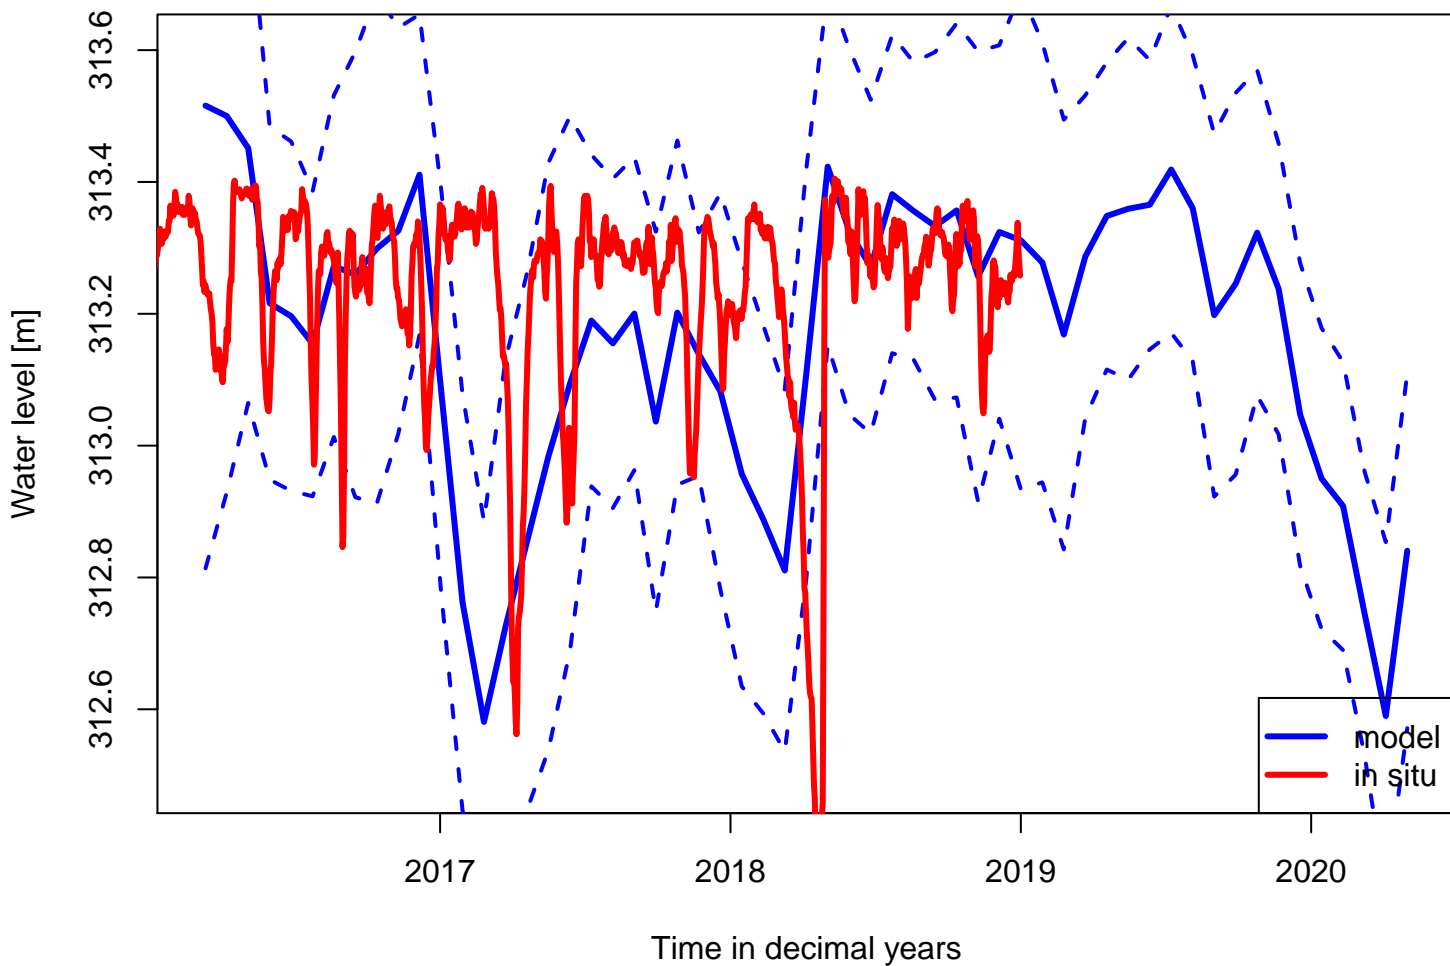

Supplement: s1 [file s1]

**lakename: Atlin lakeid: 419 lat: 59.57 lon: -133.7**

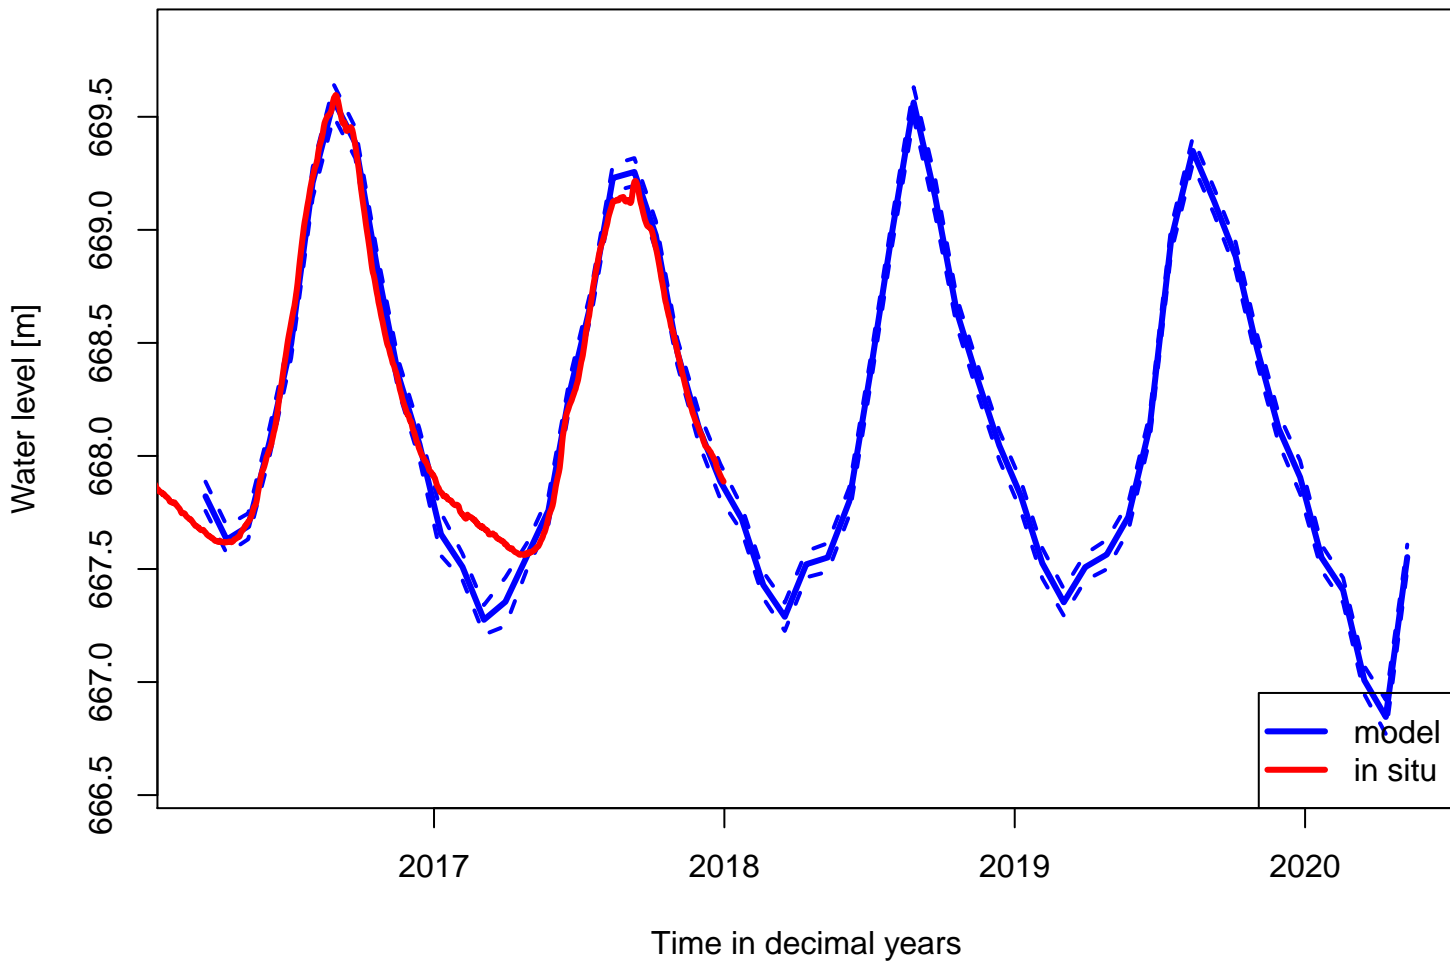

Supplement: s1 [file s1]

**lakename: lakeid: 9427 lat: 33.55 lon: -80.5**

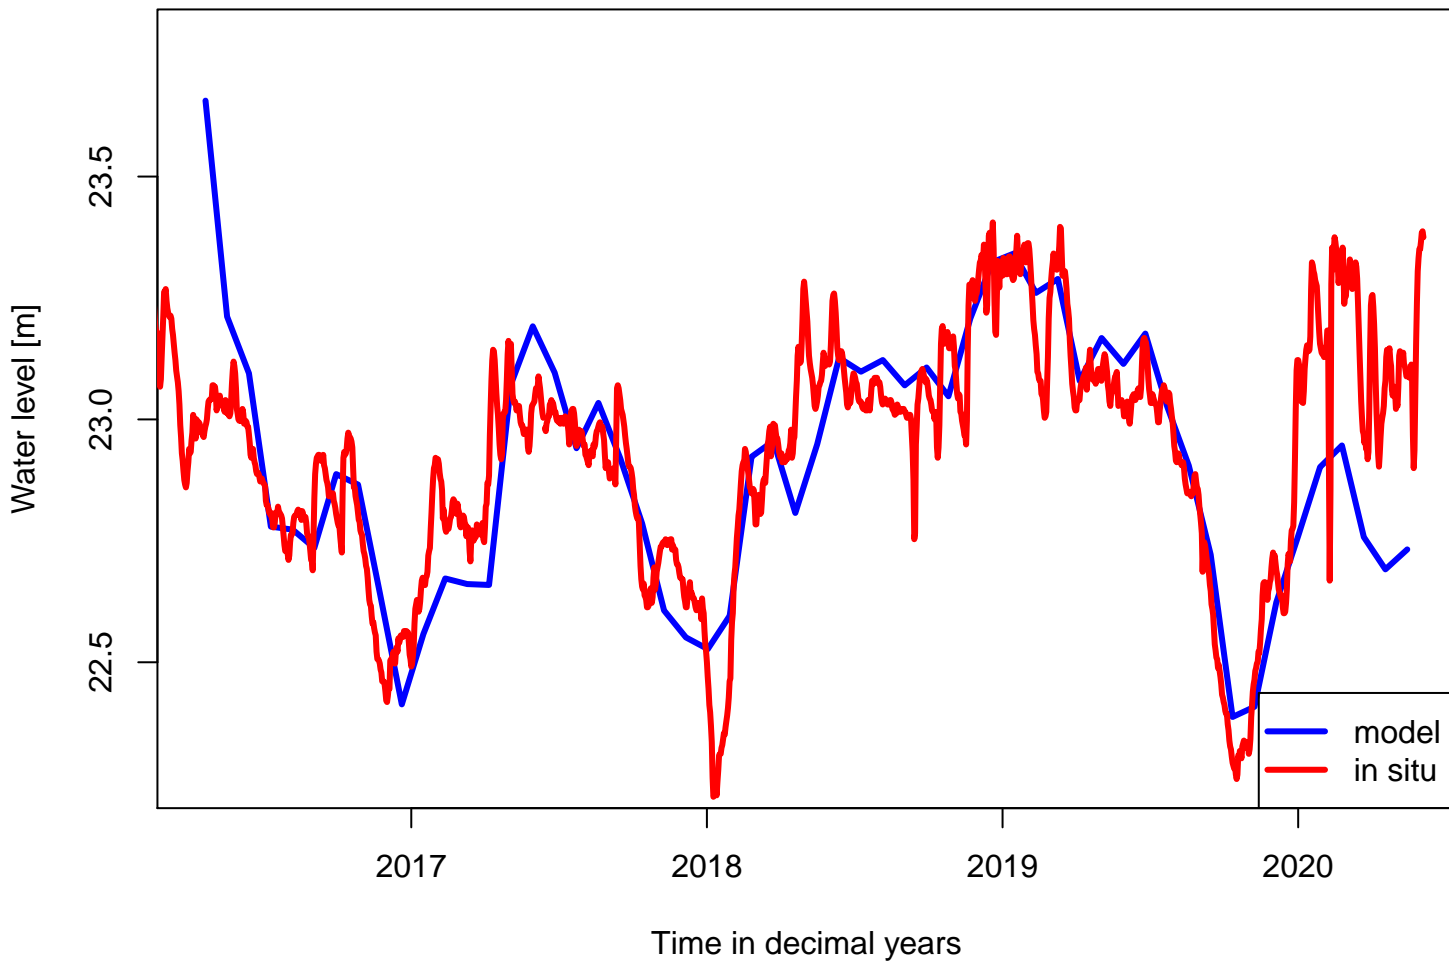

Supplement: s1 [file s1]

**lakename: J. Strom Thurmond Lake lakeid: 827 lat: 33.84 lon: -82.34**

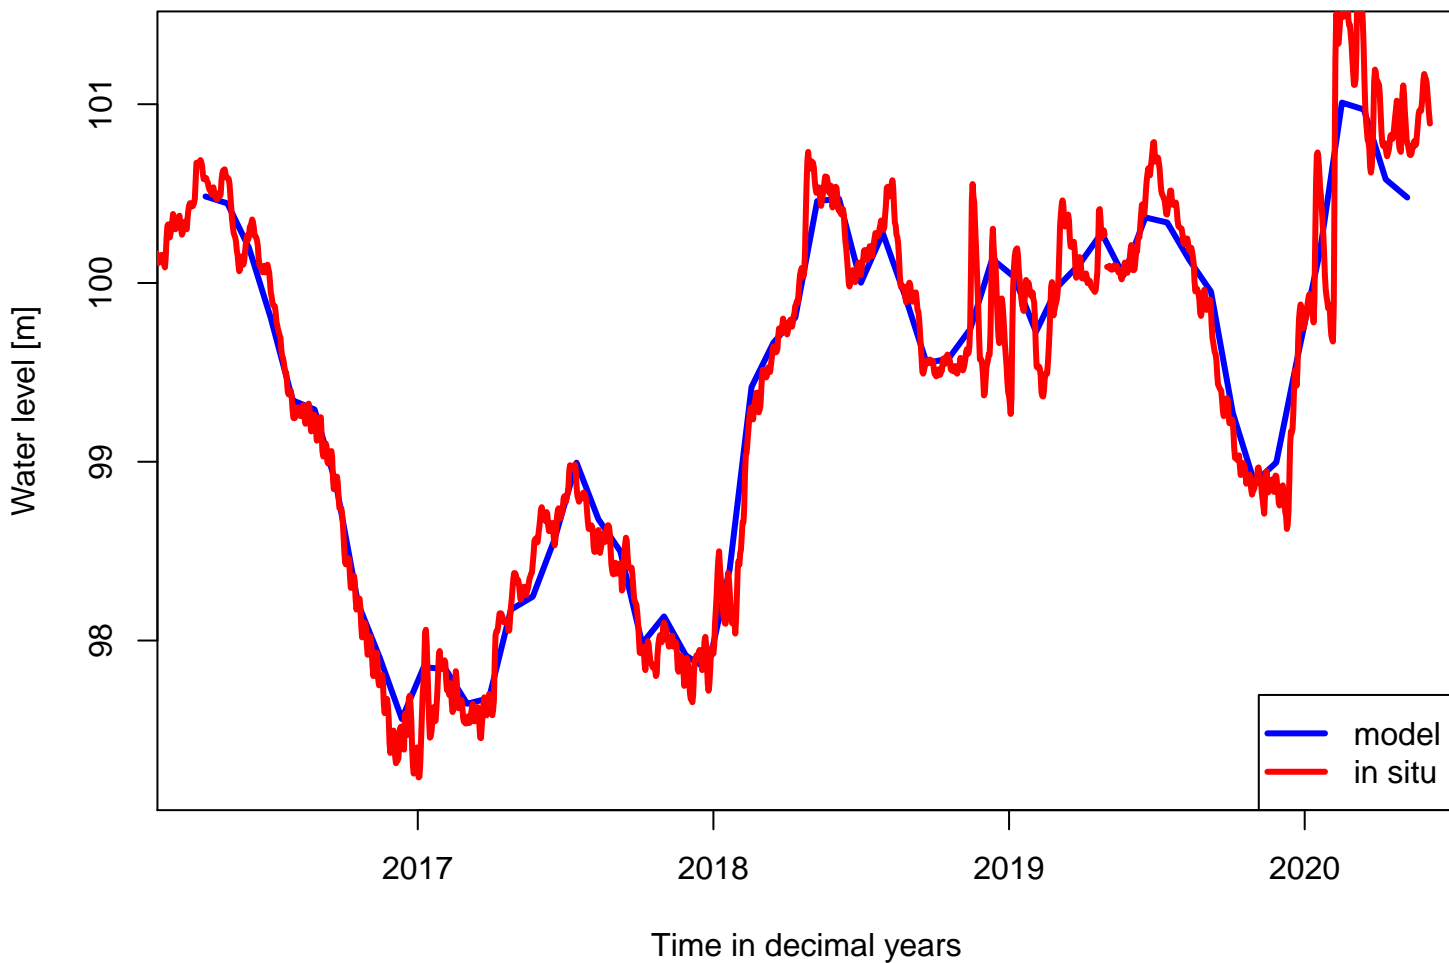

Supplement: s1 [file s1]

**lakename: Toledo Bend Reservoir lakeid: 838 lat: 31.2 lon: -93.57**

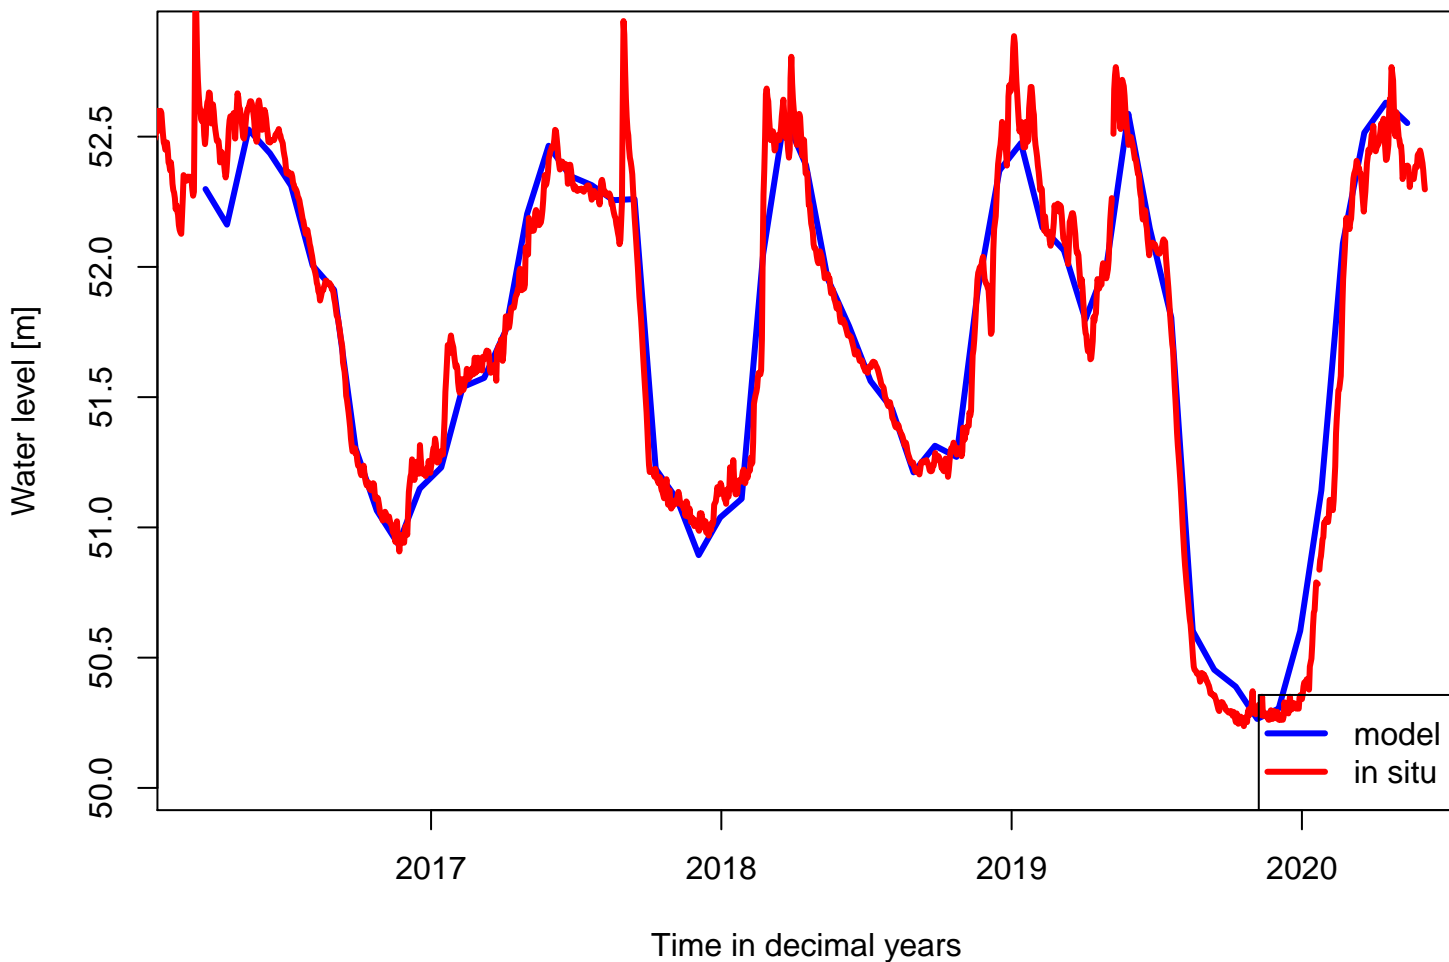

Supplement: s1 [file s1]

**lakename: lakeid: 4688 lat: 60.16 lon: -134.7**

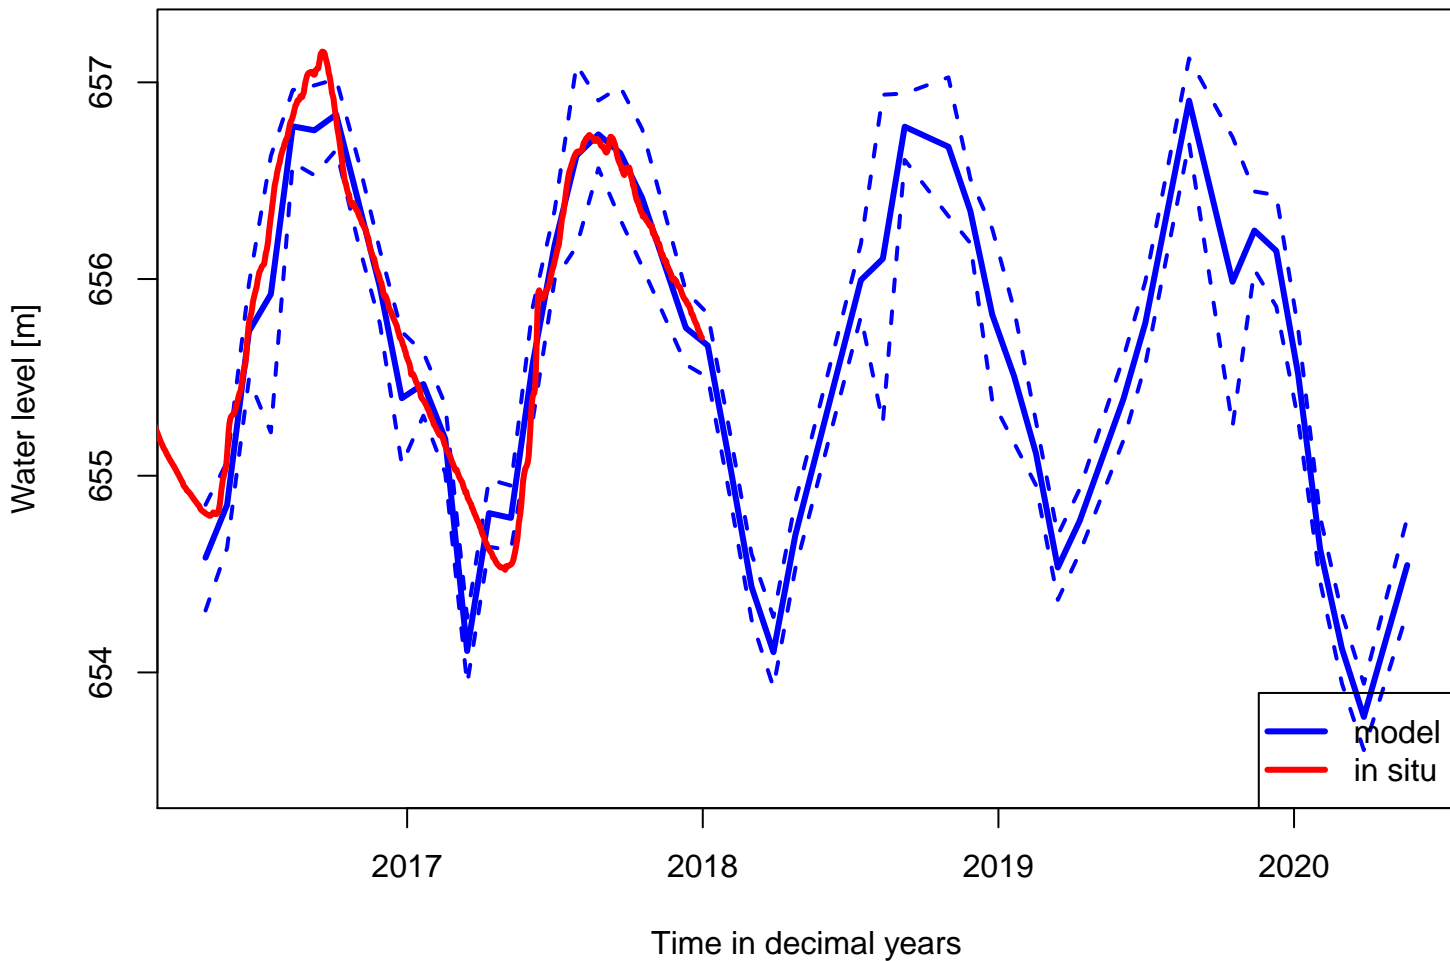

Supplement: s1 [file s1]

**lakename: Lake Texoma lakeid: 825 lat: 33.82 lon: -96.57**

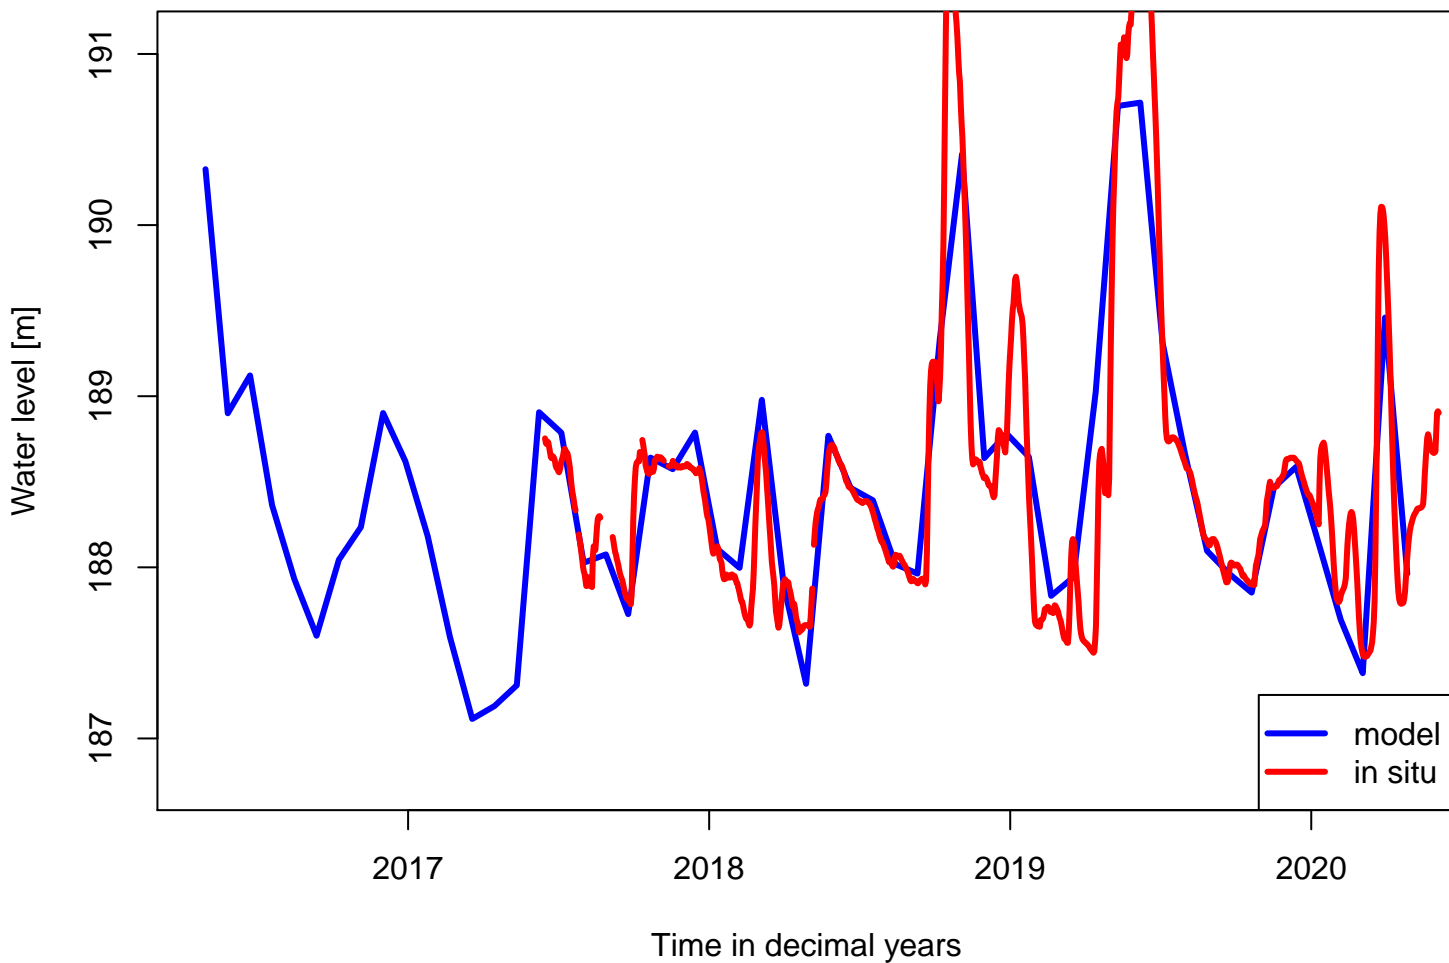

Supplement: s1 [file s1]

**lakename: Woods lakeid: 57 lat: 48.9 lon: -95.32**

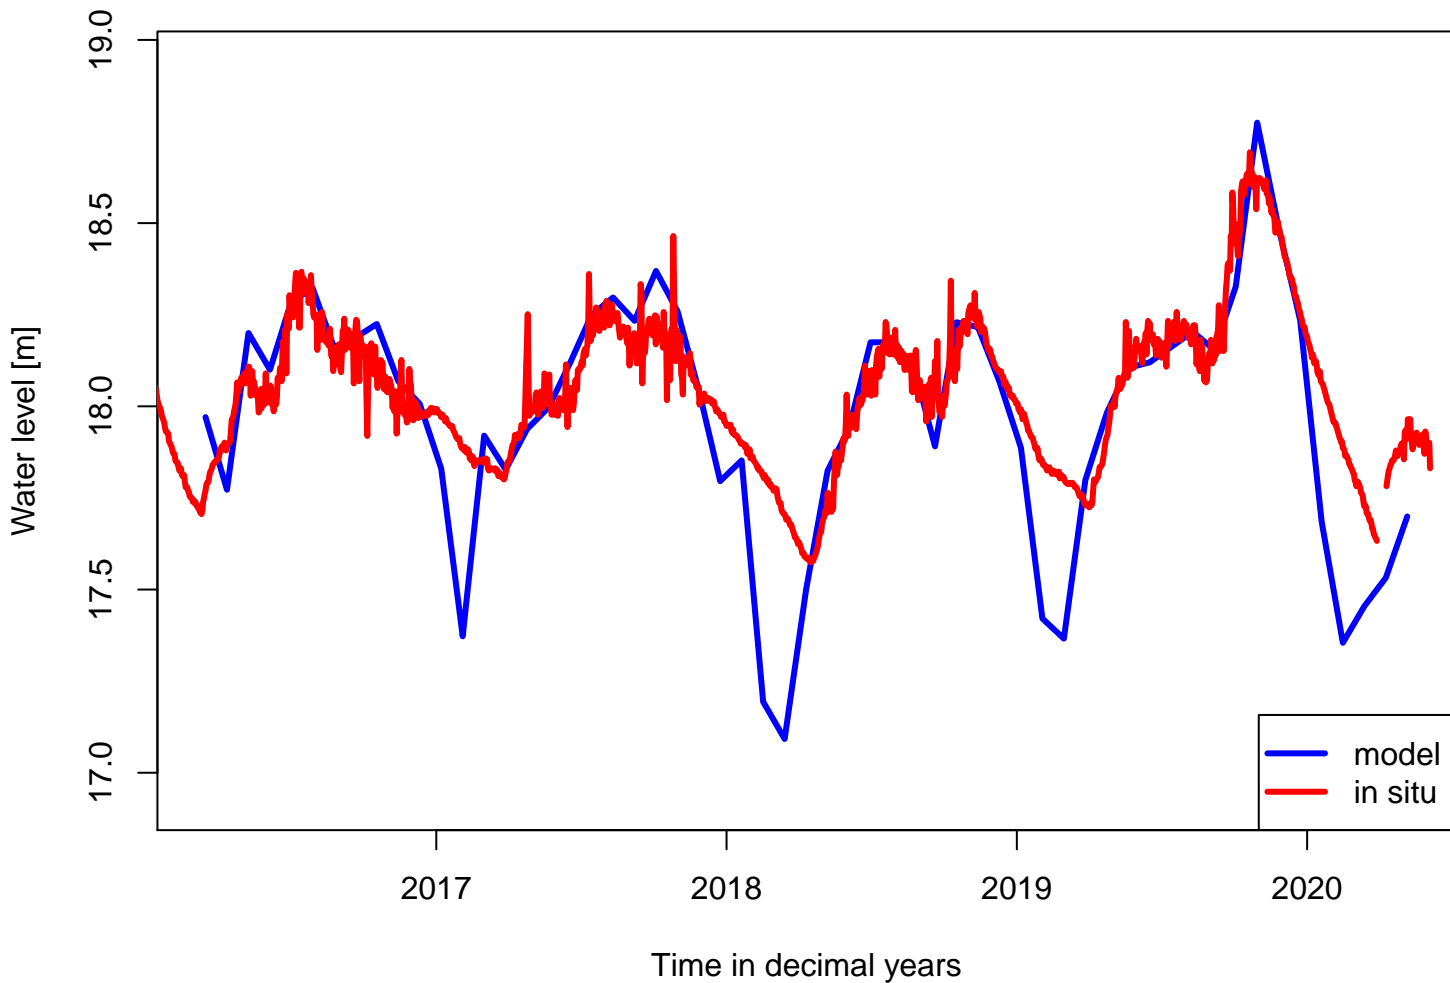

Supplement: s1 [file s1]

**lakename: Manitoba lakeid: 53 lat: 51.44 lon: -98.8**

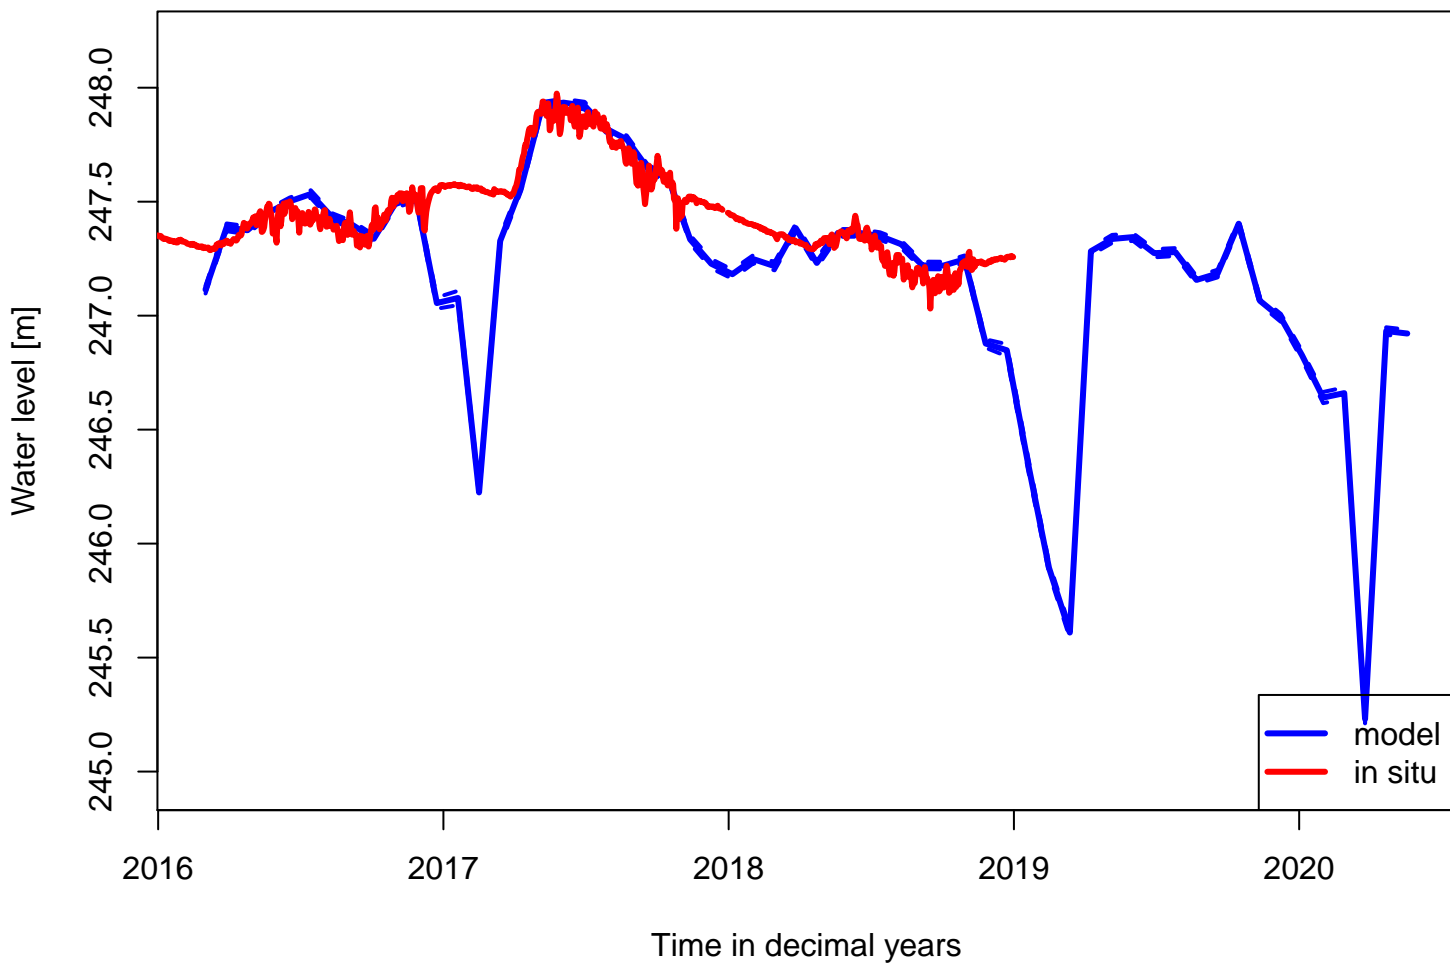

Supplement: s1 [file s1]

**lakename: Nechako Reservoir lakeid: 591 lat: 53.65 lon: -127.5**

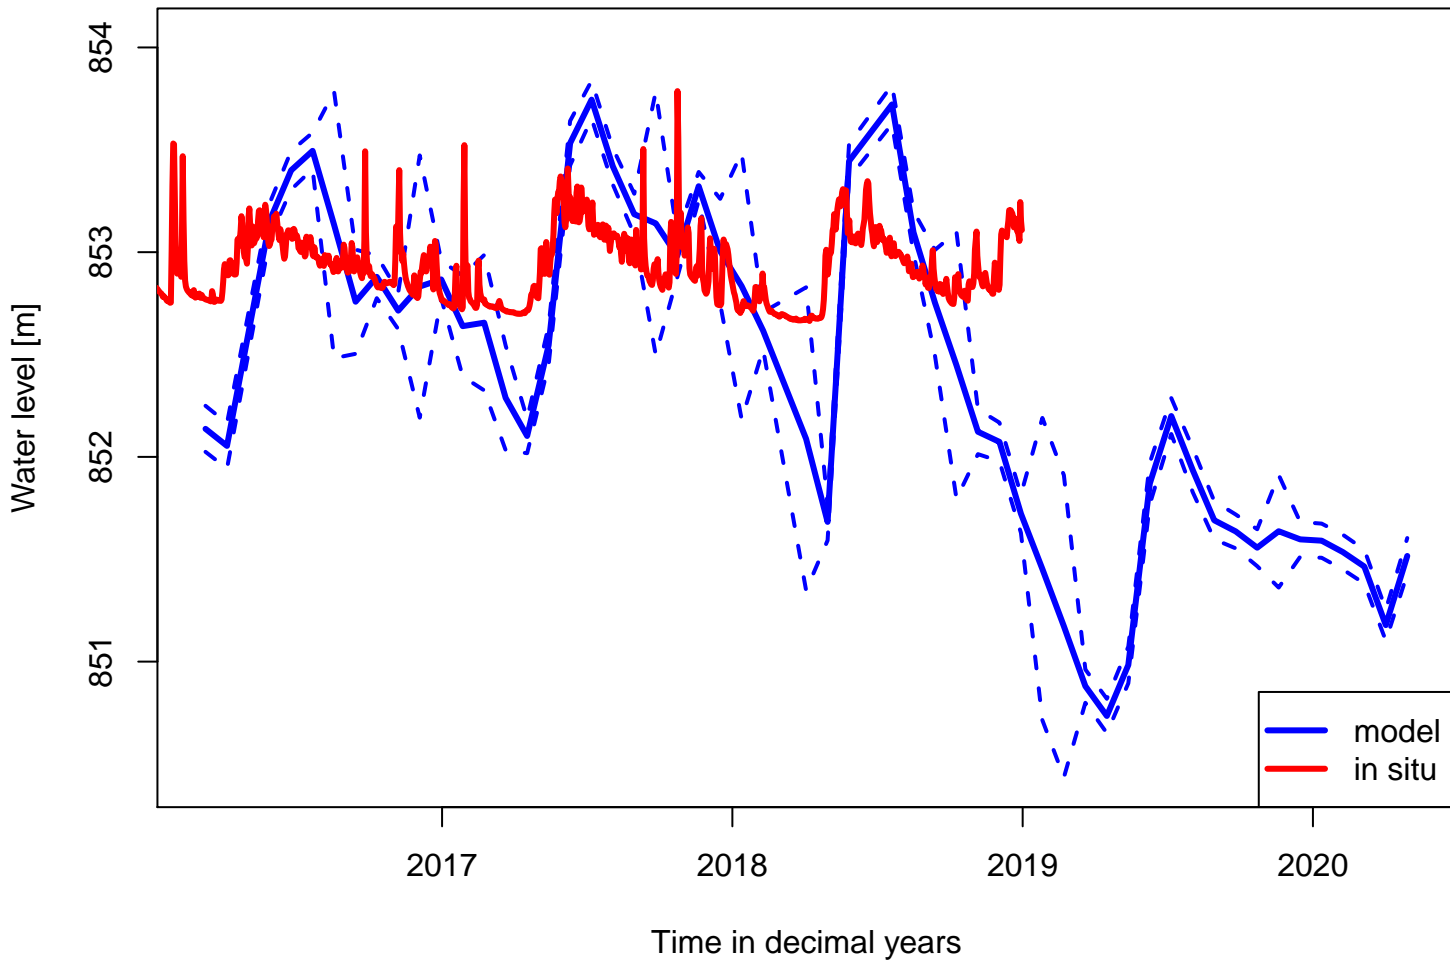

Supplement: s1 [file s1]

**lakename: Schultz lakeid: 273 lat: 64.78 lon: -97.05**

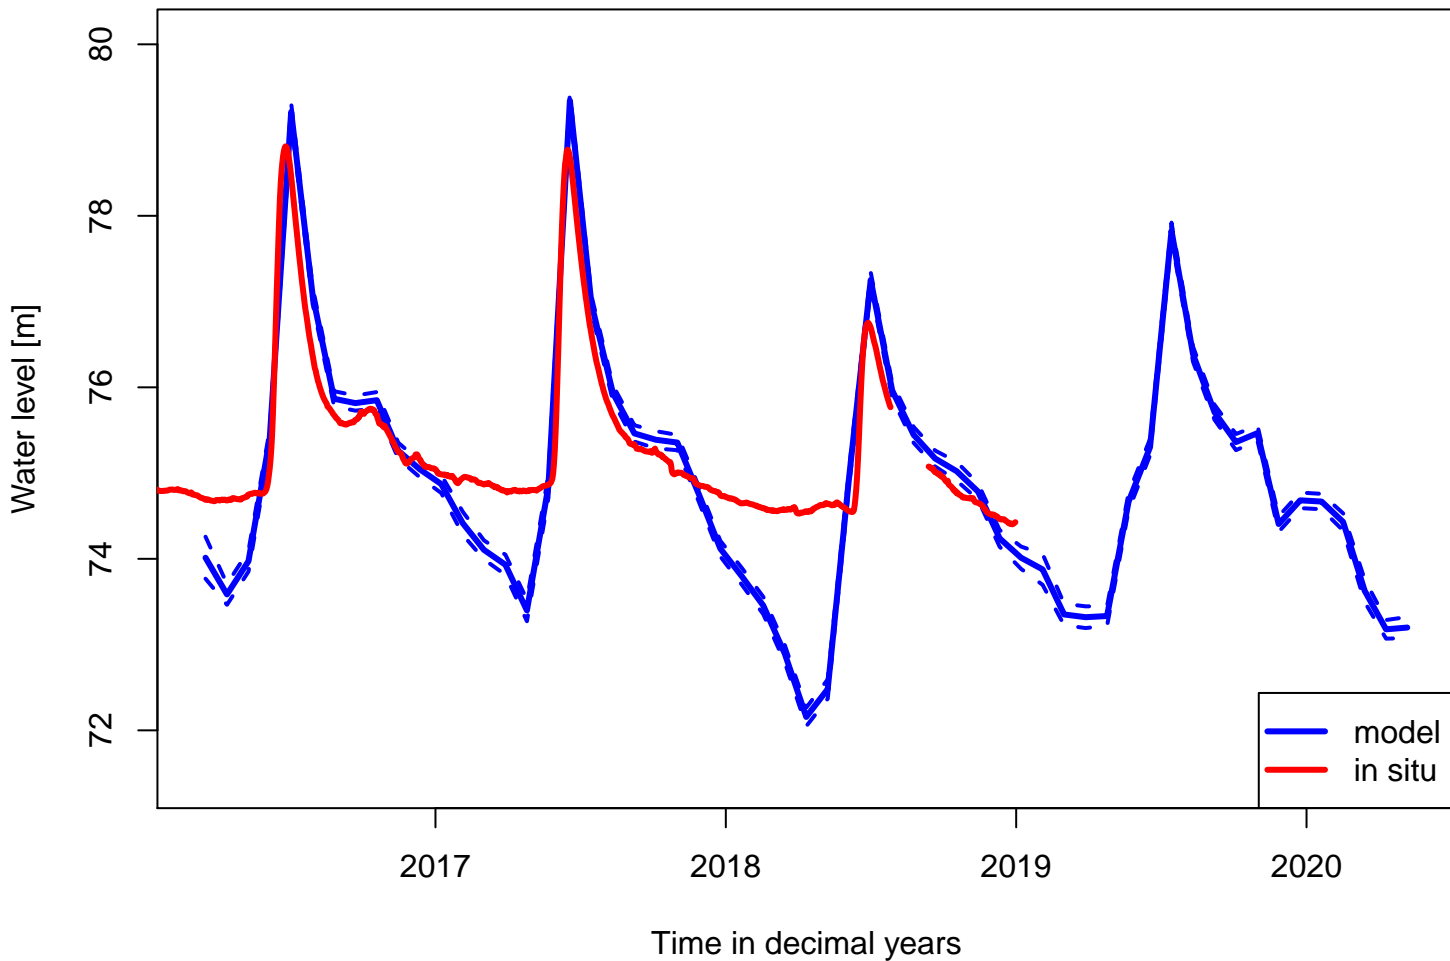

Supplement: s1 [file s1]

**lakename: lakeid: 579 lat: 54.01 lon: -125**

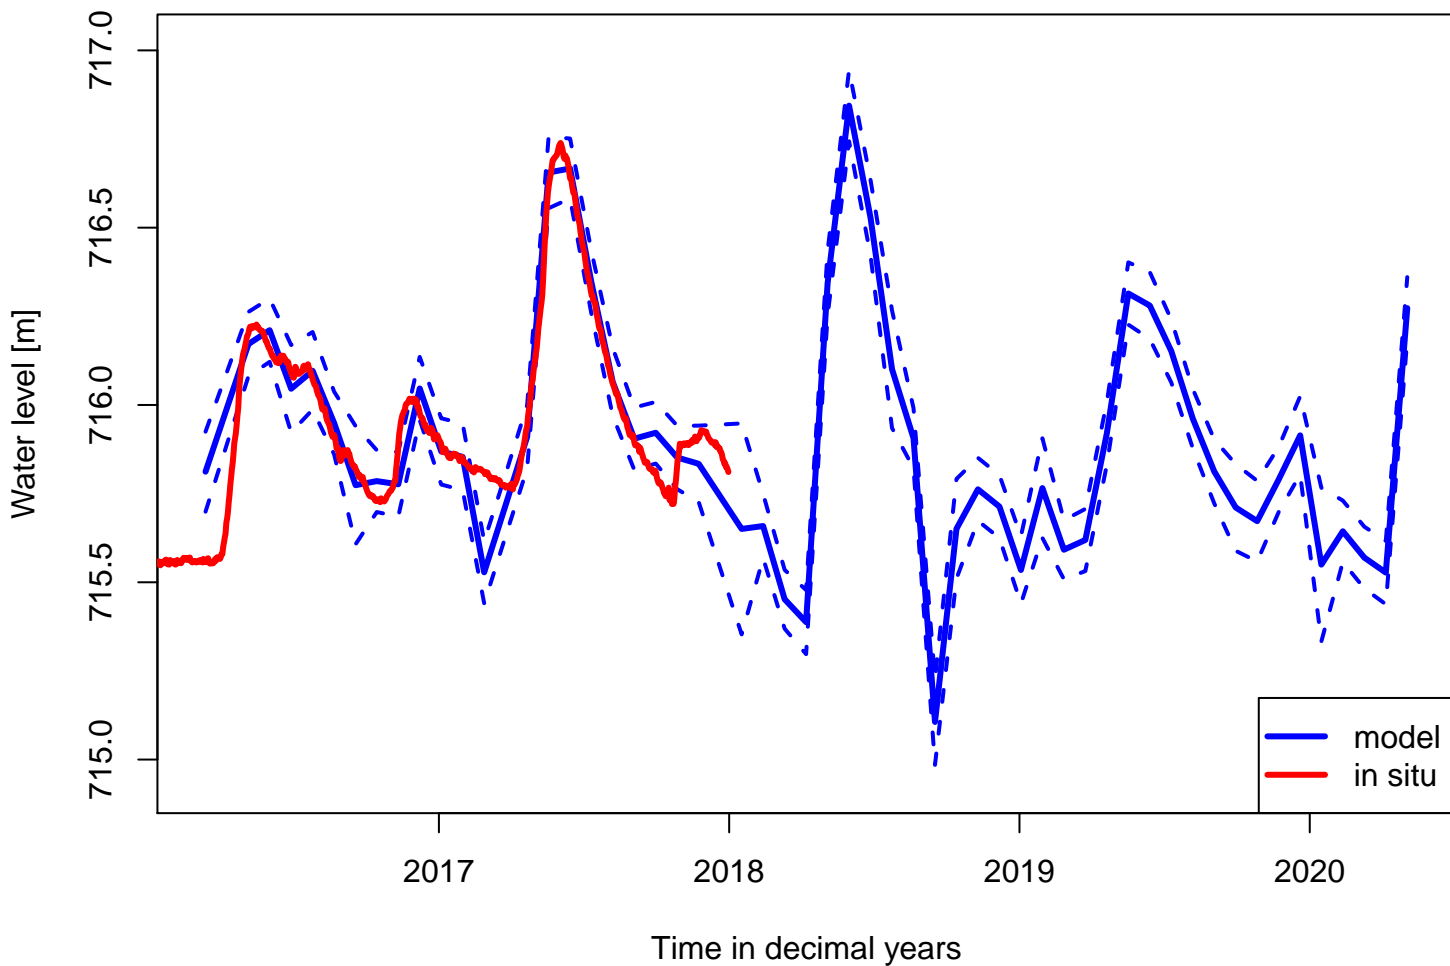

Supplement: s1 [file s1]

**lakename: Wollaston lakeid: 32 lat: 58.48 lon: -103.3**

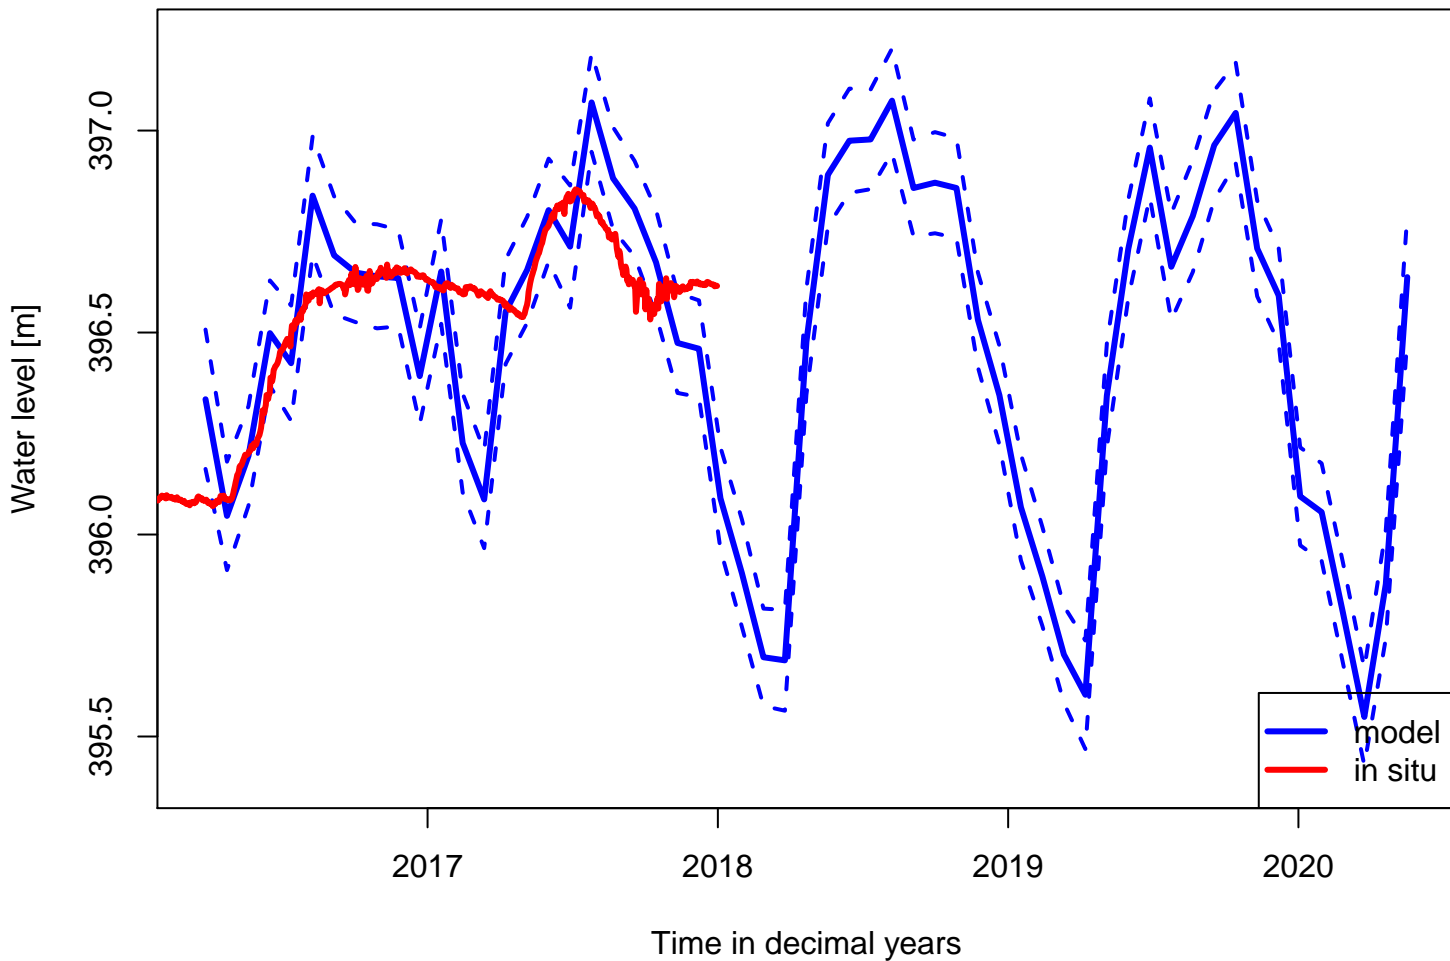

Supplement: s1 [file s1]

**lakename: Tazin lakeid: 412 lat: 59.82 lon: -109.4**

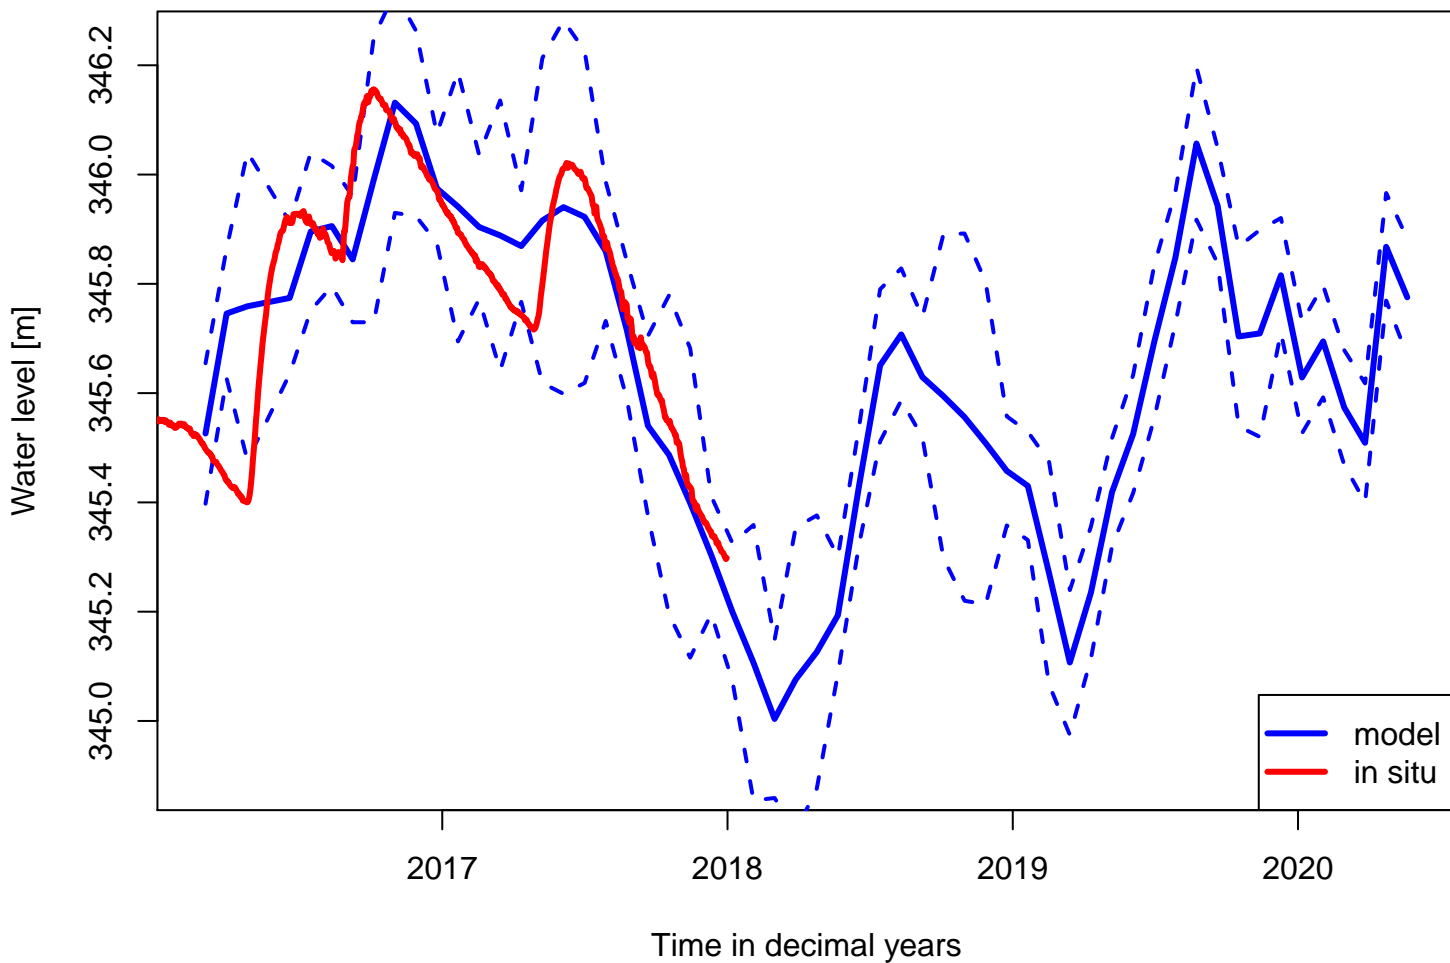

Supplement: s1 [file s1]

**lakename: Victoria lakeid: 717 lat: 48.36 lon: -57.12**

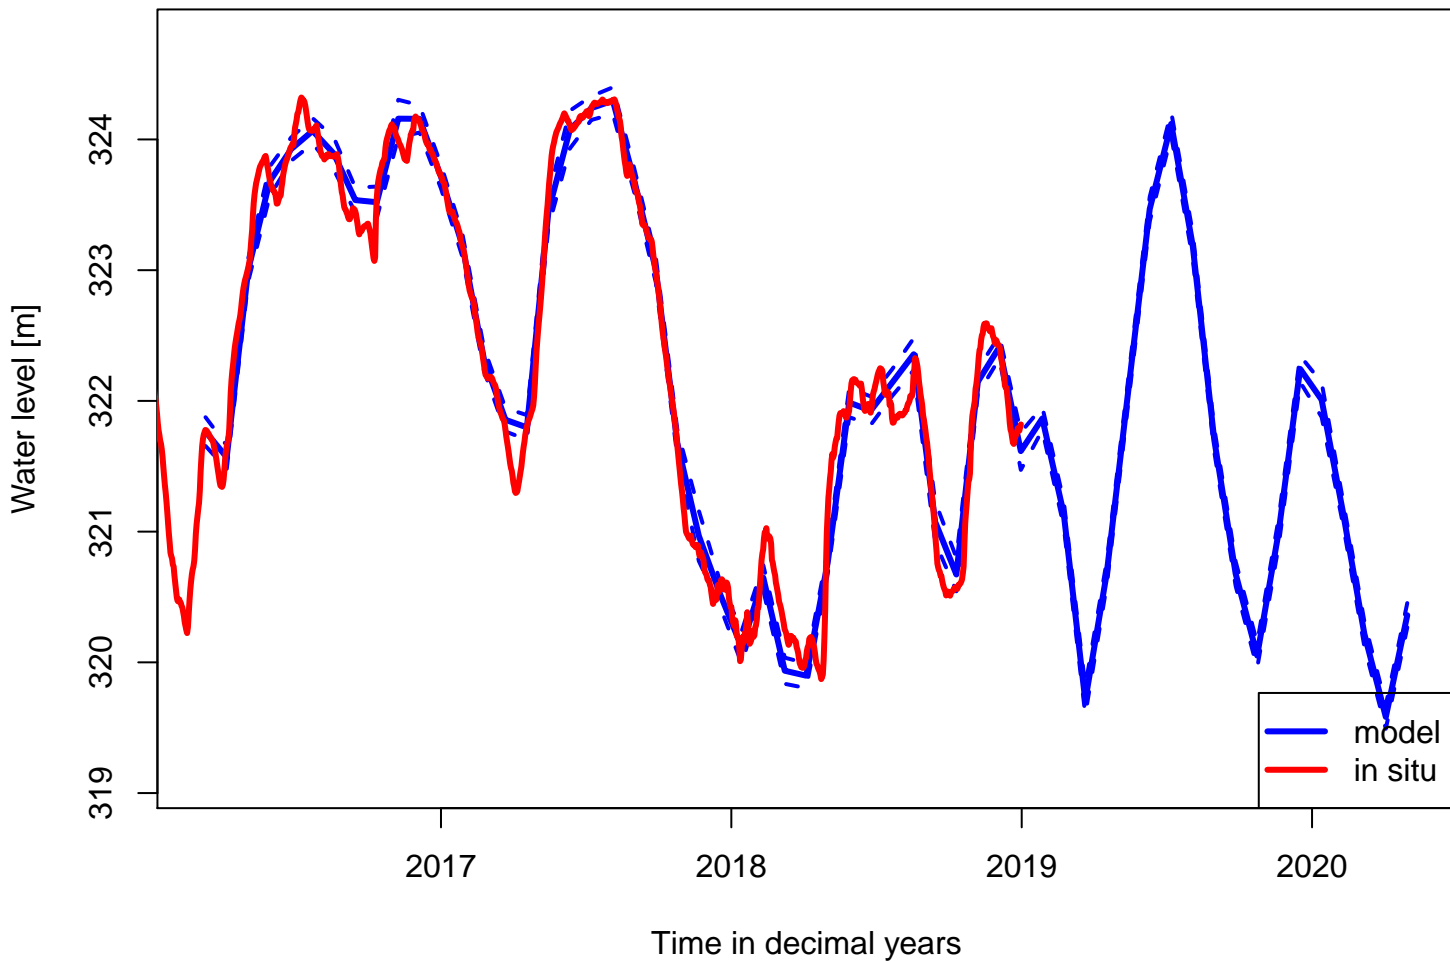

Supplement: s1 [file s1]

**lakename: Nonacho lakeid: 359 lat: 61.73 lon: -109.7**

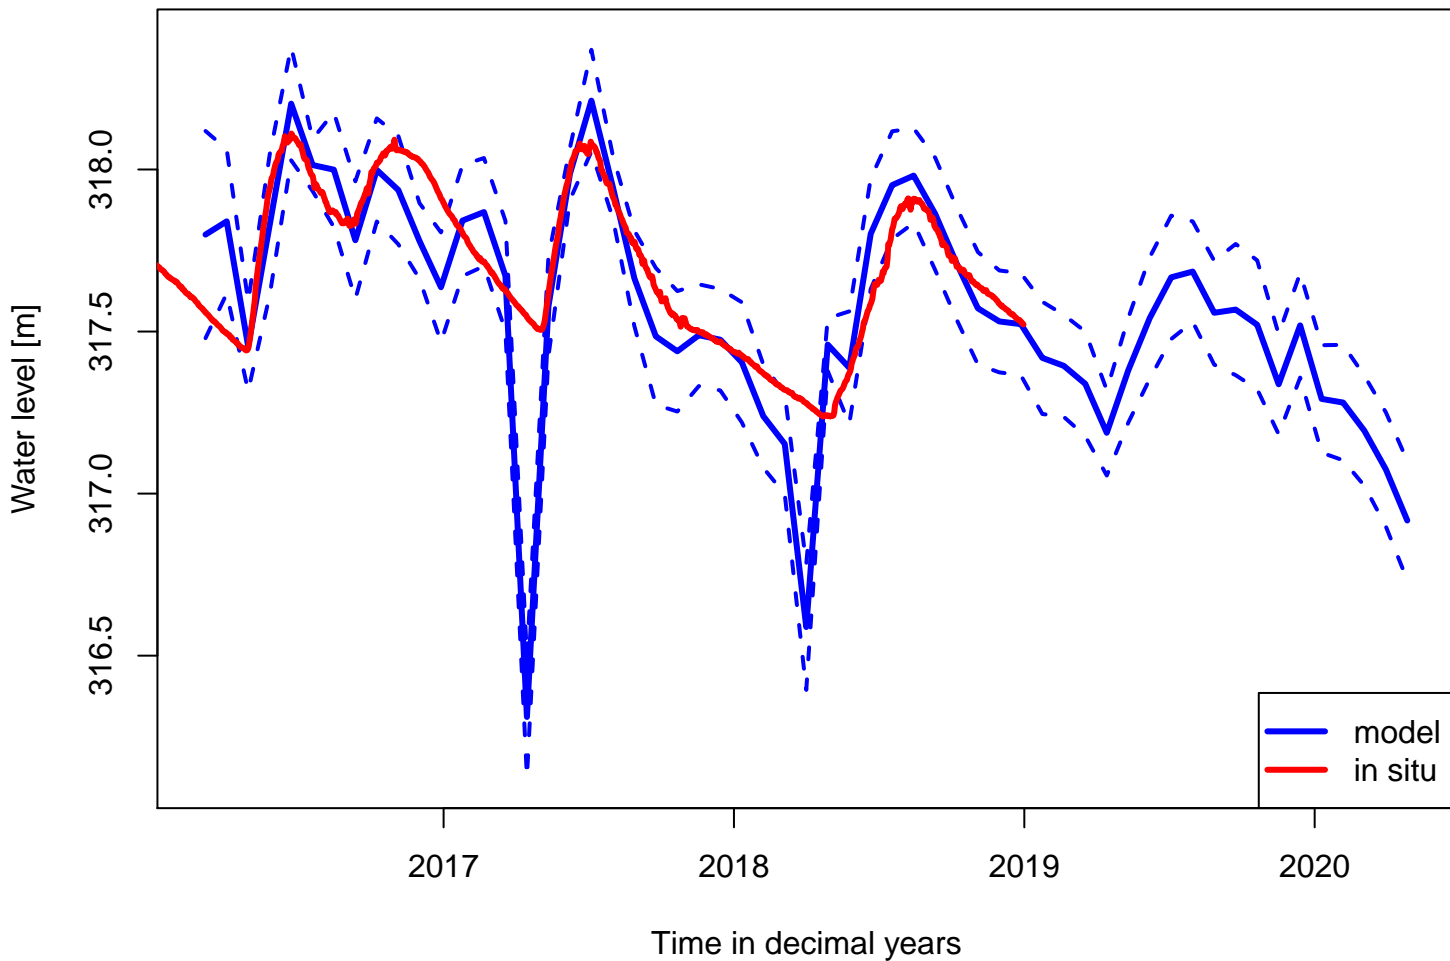

Supplement: s1 [file s1]

**lakename: Lesser Slave lakeid: 42 lat: 55.31 lon: -114.8**

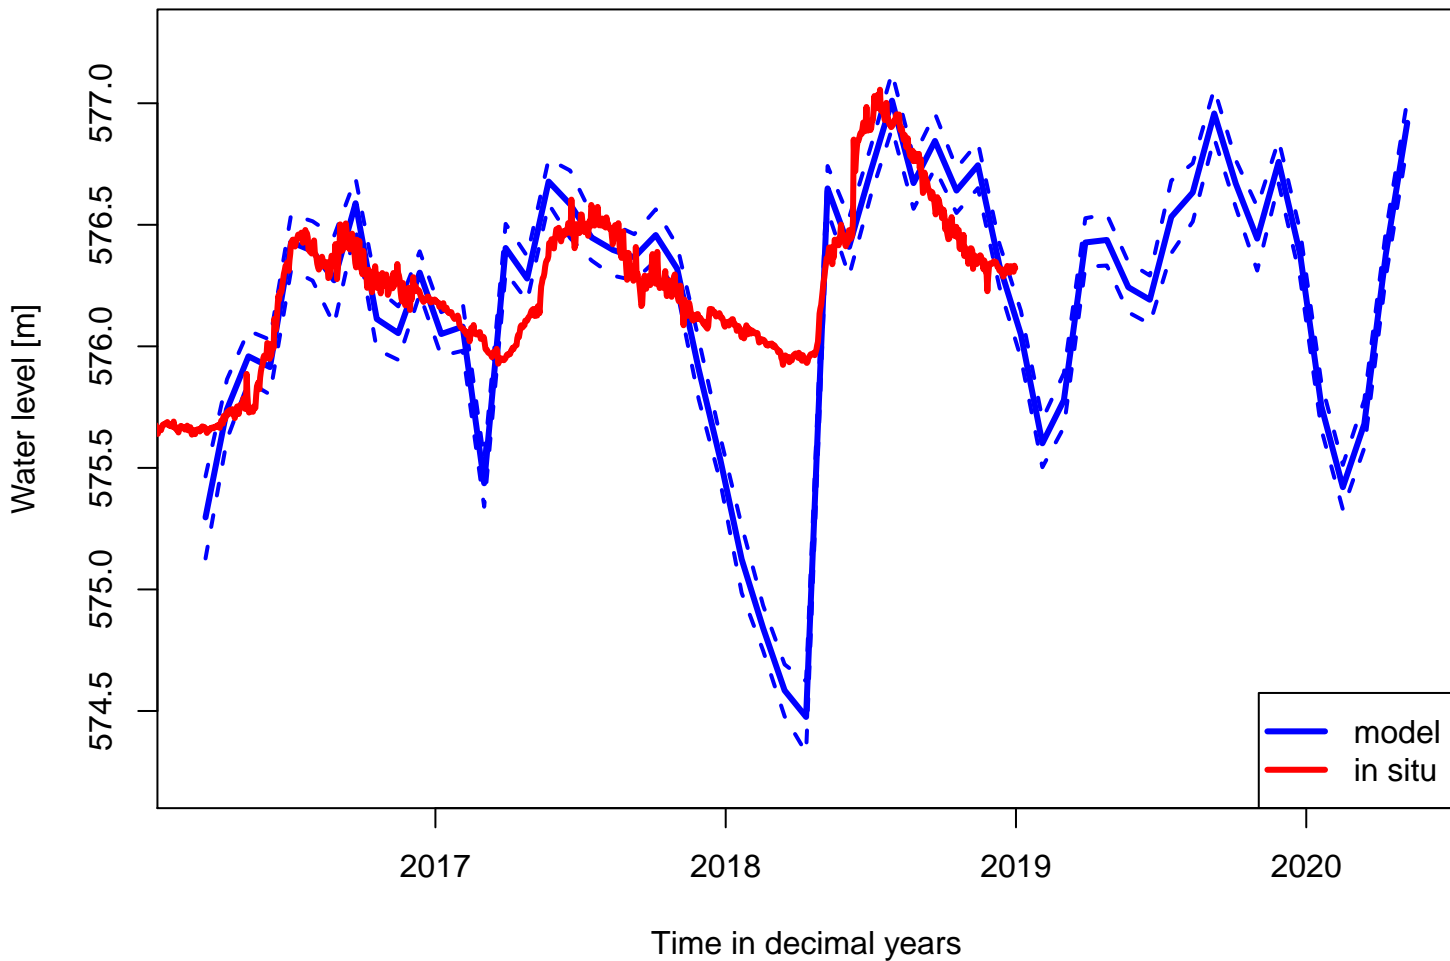

Supplement: s1 [file s1]

**lakename: Reindeer lakeid: 38 lat: 57.88 lon: -101.7**

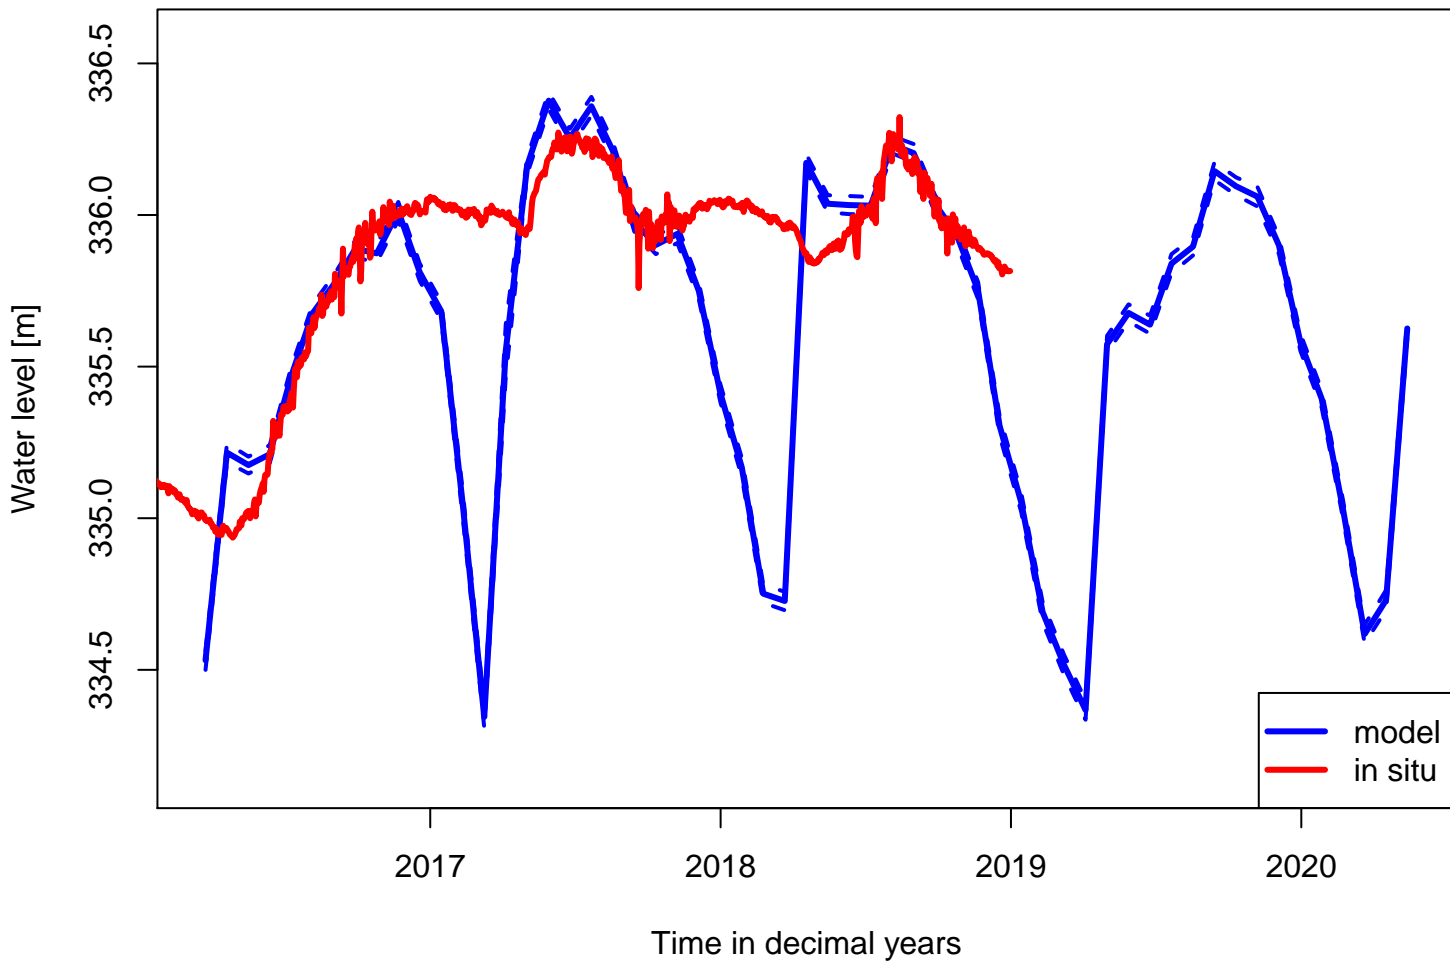

Supplement: s1 [file s1]

**lakename: Claire lakeid: 34 lat: 58.63 lon: -111.7**

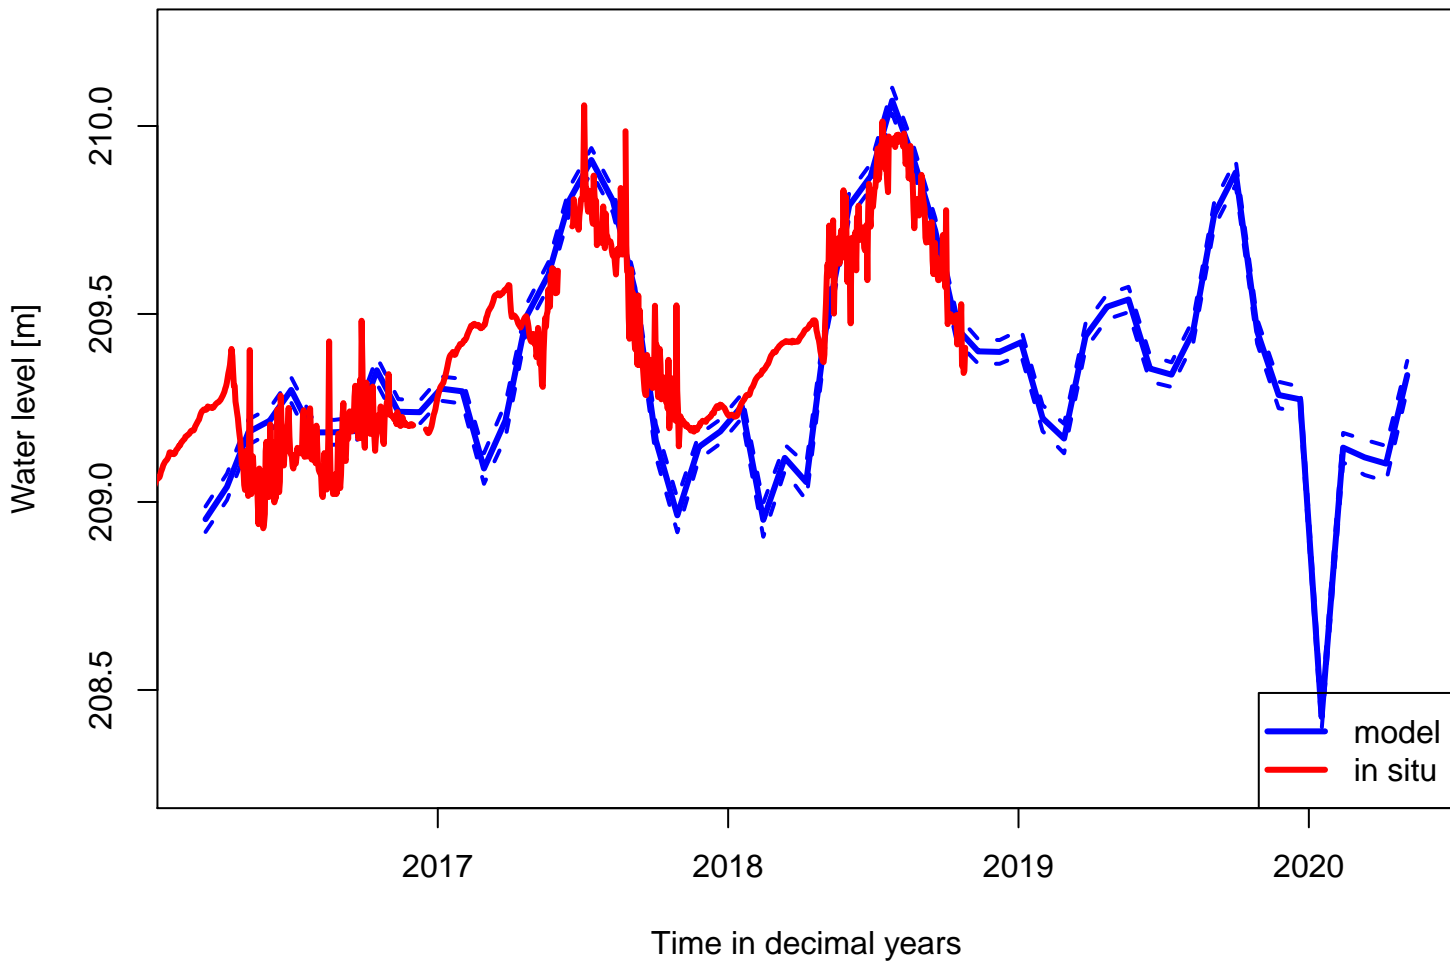

Supplement: s1 [file s1]

**lakename: Osage lakeid: 797 lat: 38.26 lon: -93.4**

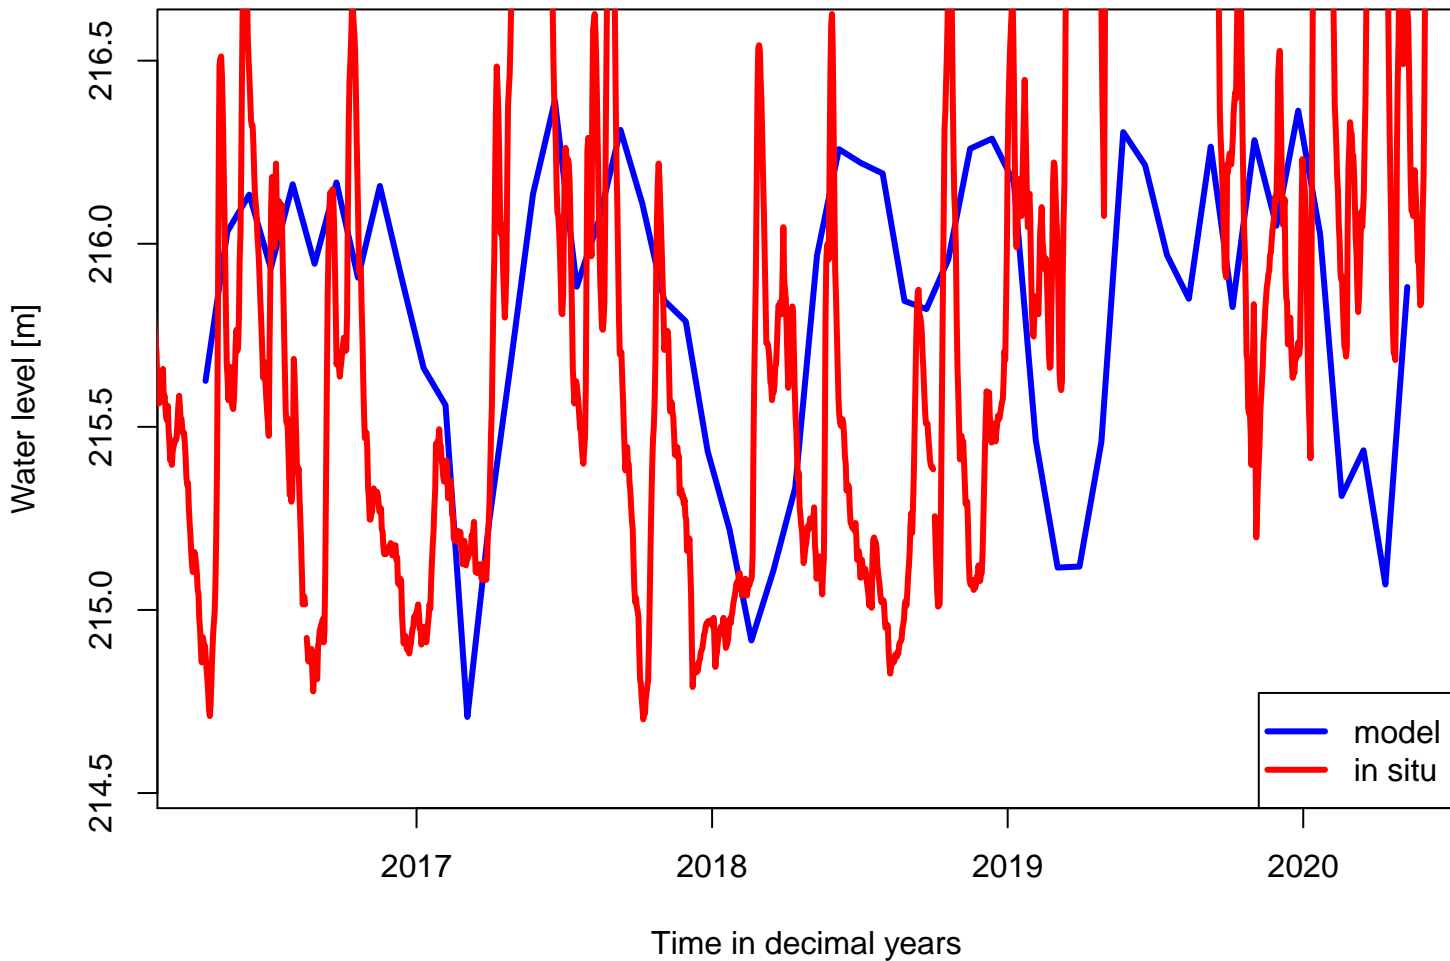

Supplement: s1 [file s1]

**lakename: lakeid: 401 lat: 60.16 lon: -134.7**

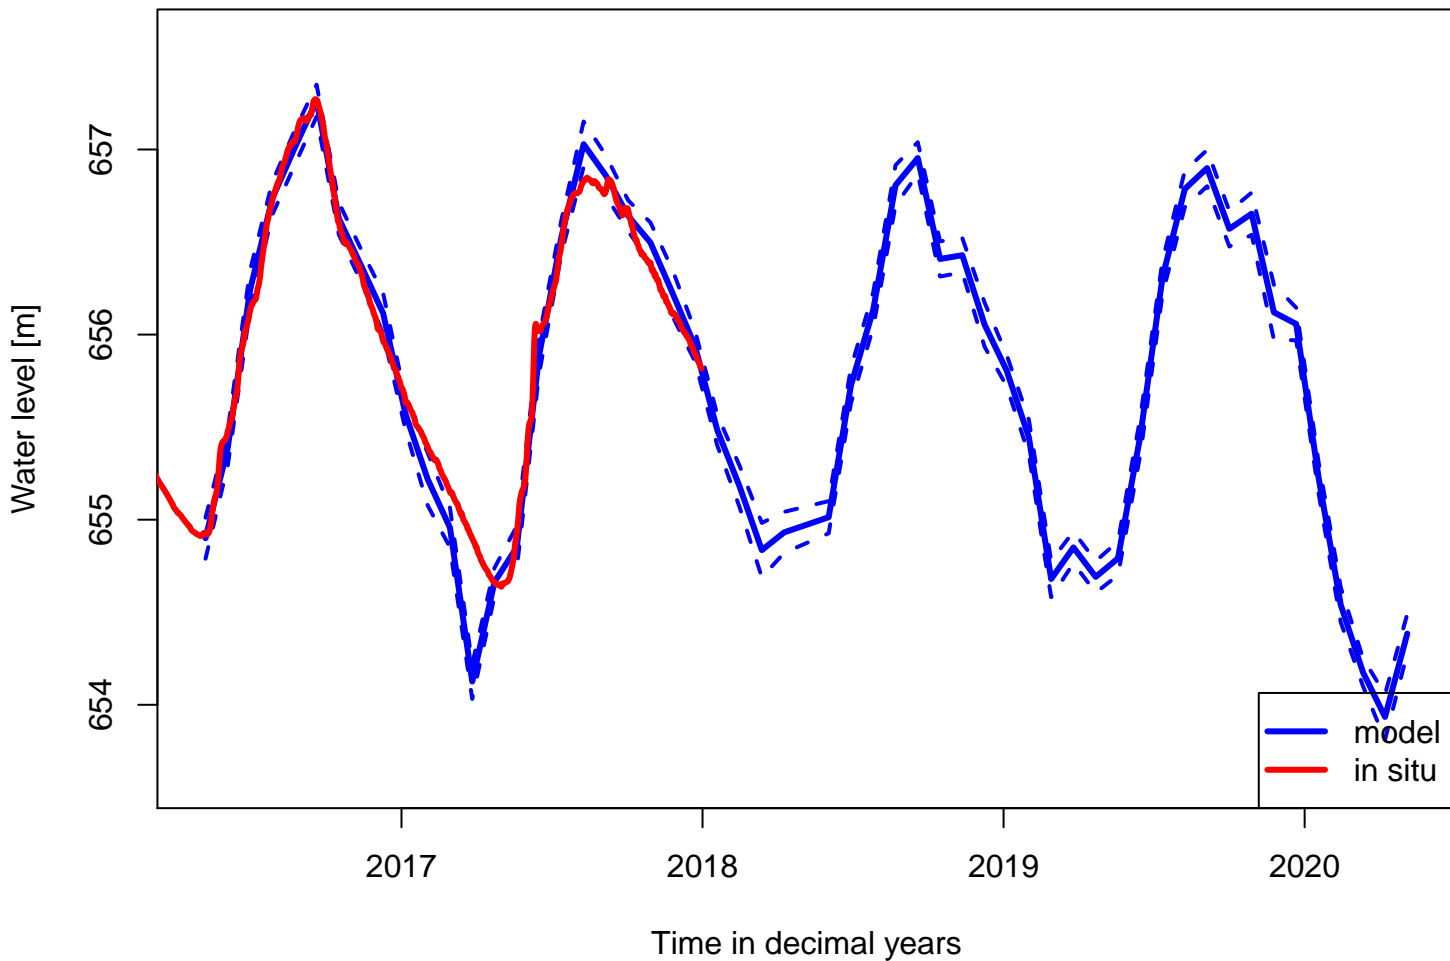

Supplement: s1 [file s1]

**lakename: Chautauqua Lake lakeid: 9129 lat: 42.16 lon: -79.39**

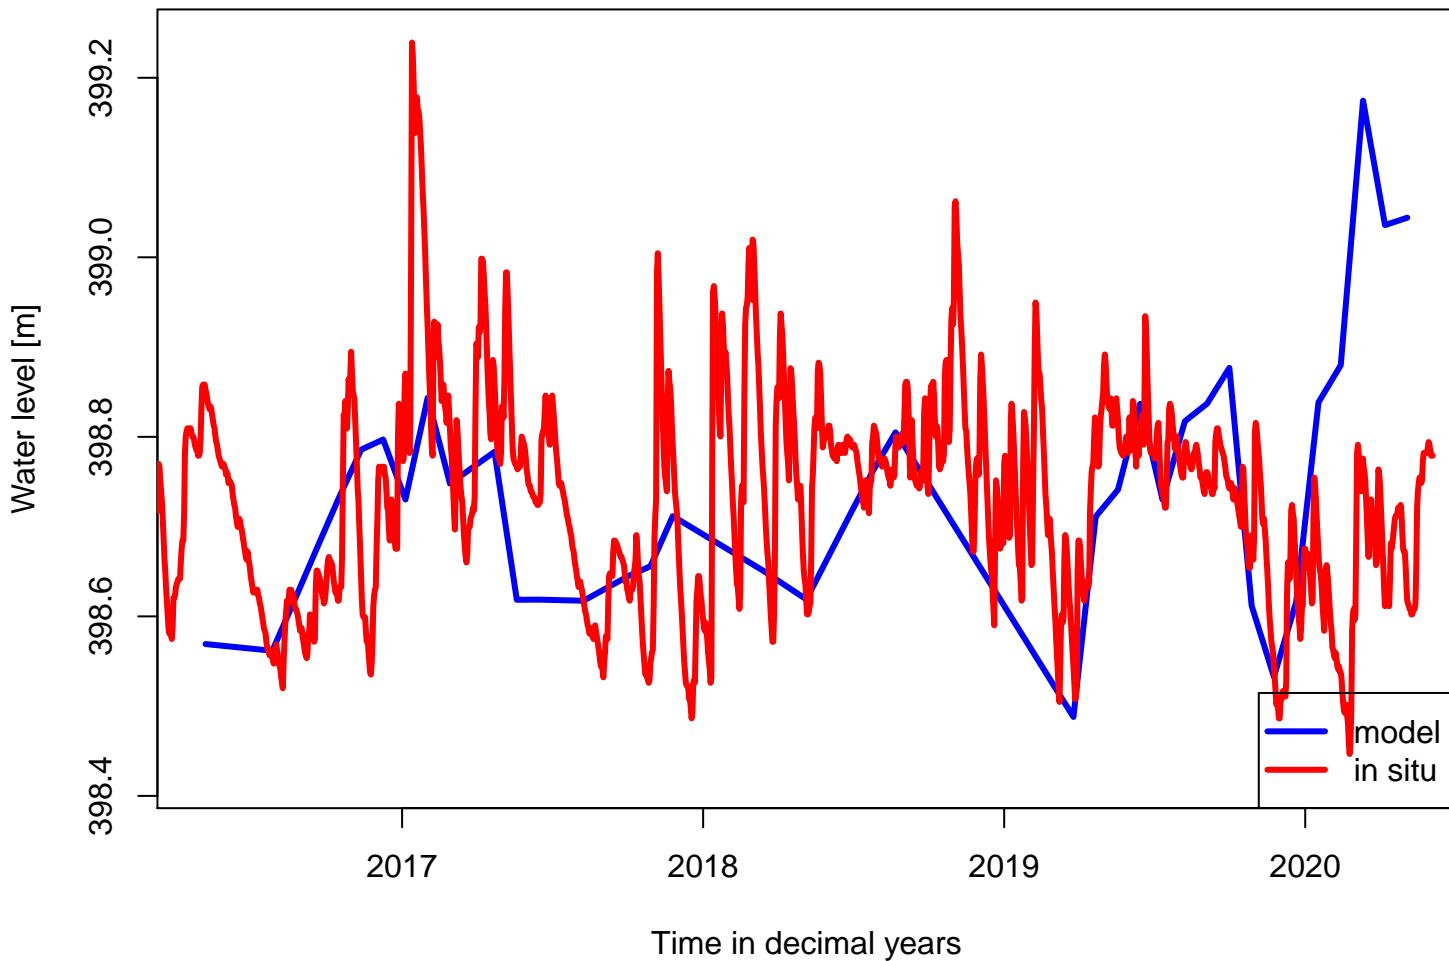

Supplement: s1 [file s1]

**lakename: Wollaston lakeid: 32 lat: 58.48 lon: -103.3**

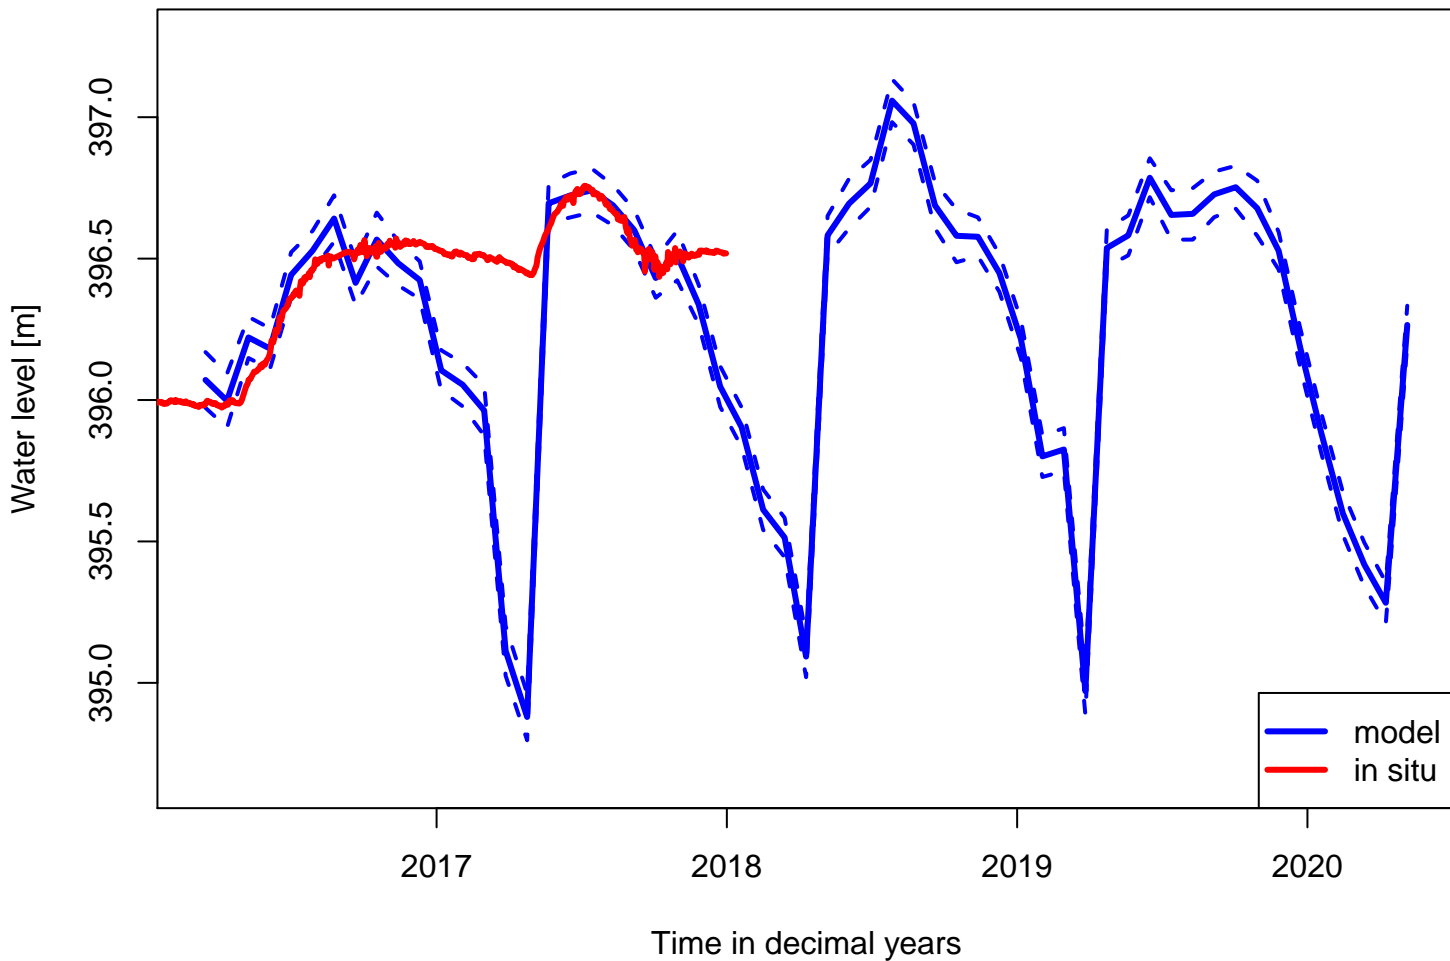

Supplement: s1 [file s1]

**lakename: Woods lakeid: 57 lat: 48.9 lon: -95.32**

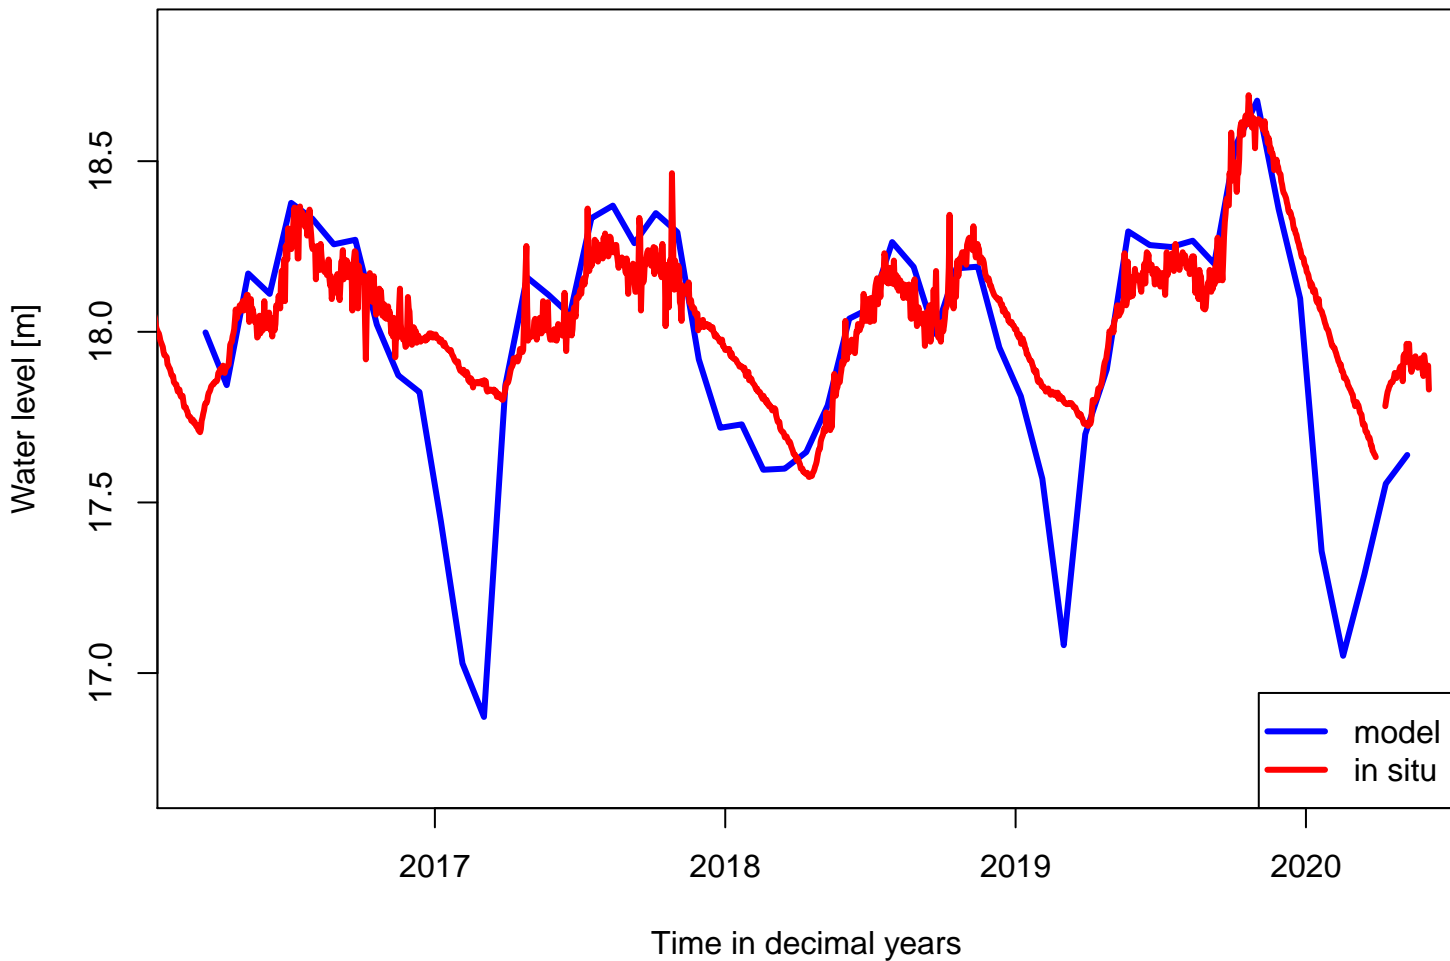

Supplement: s1 [file s1]

**lakename: Pontchartrain lakeid: 68 lat: 30.2 lon: -90.12**

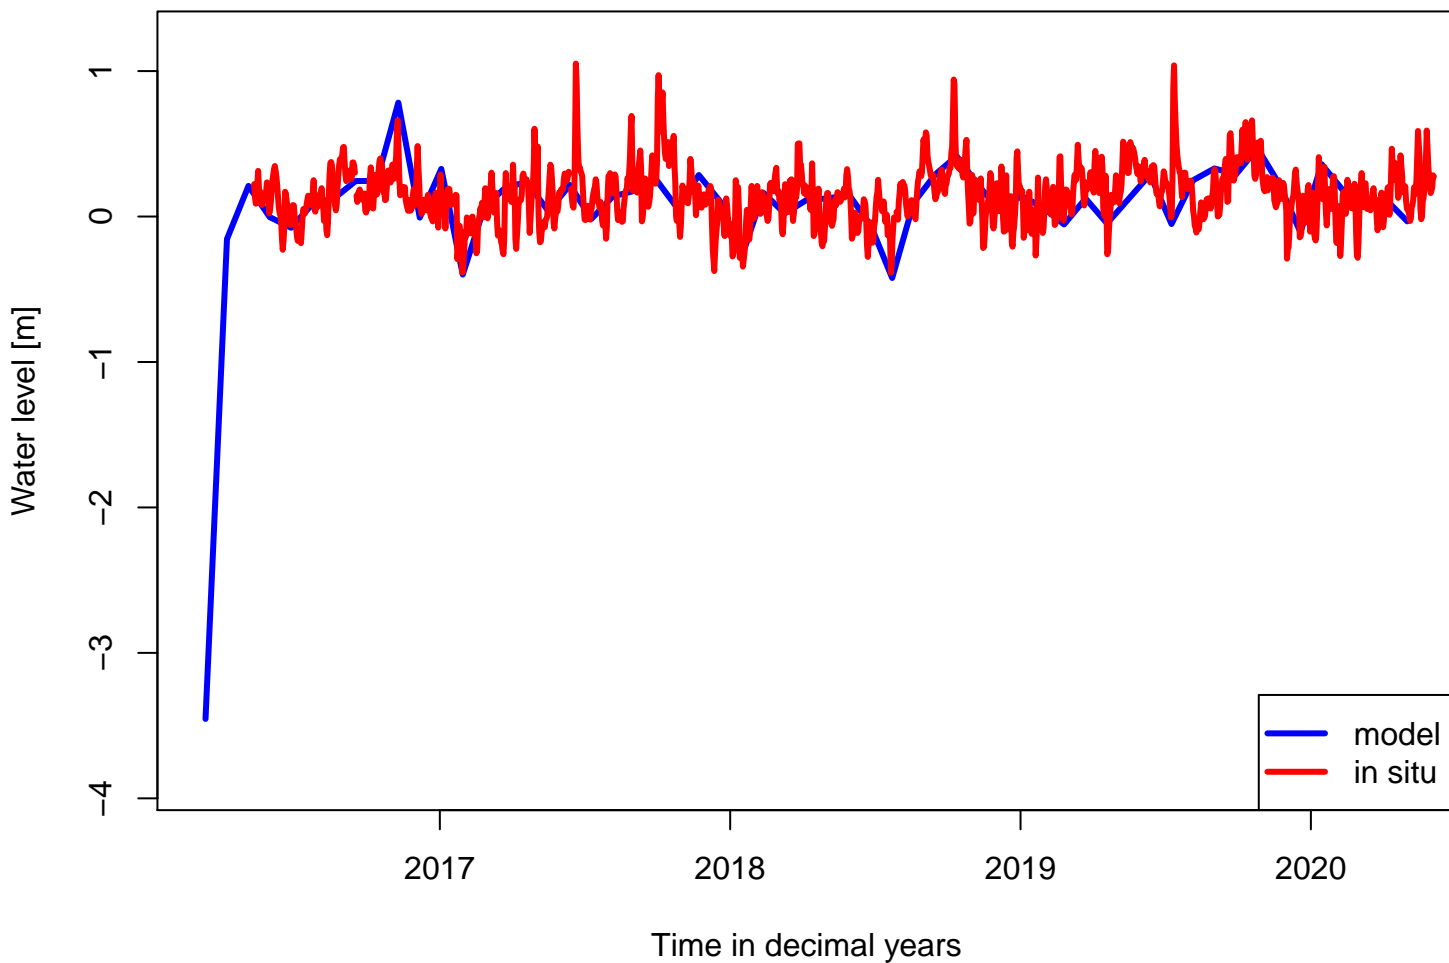

Supplement: s1 [file s1]

**lakename: Babine lakeid: 517 lat: 55.32 lon: -126.6**

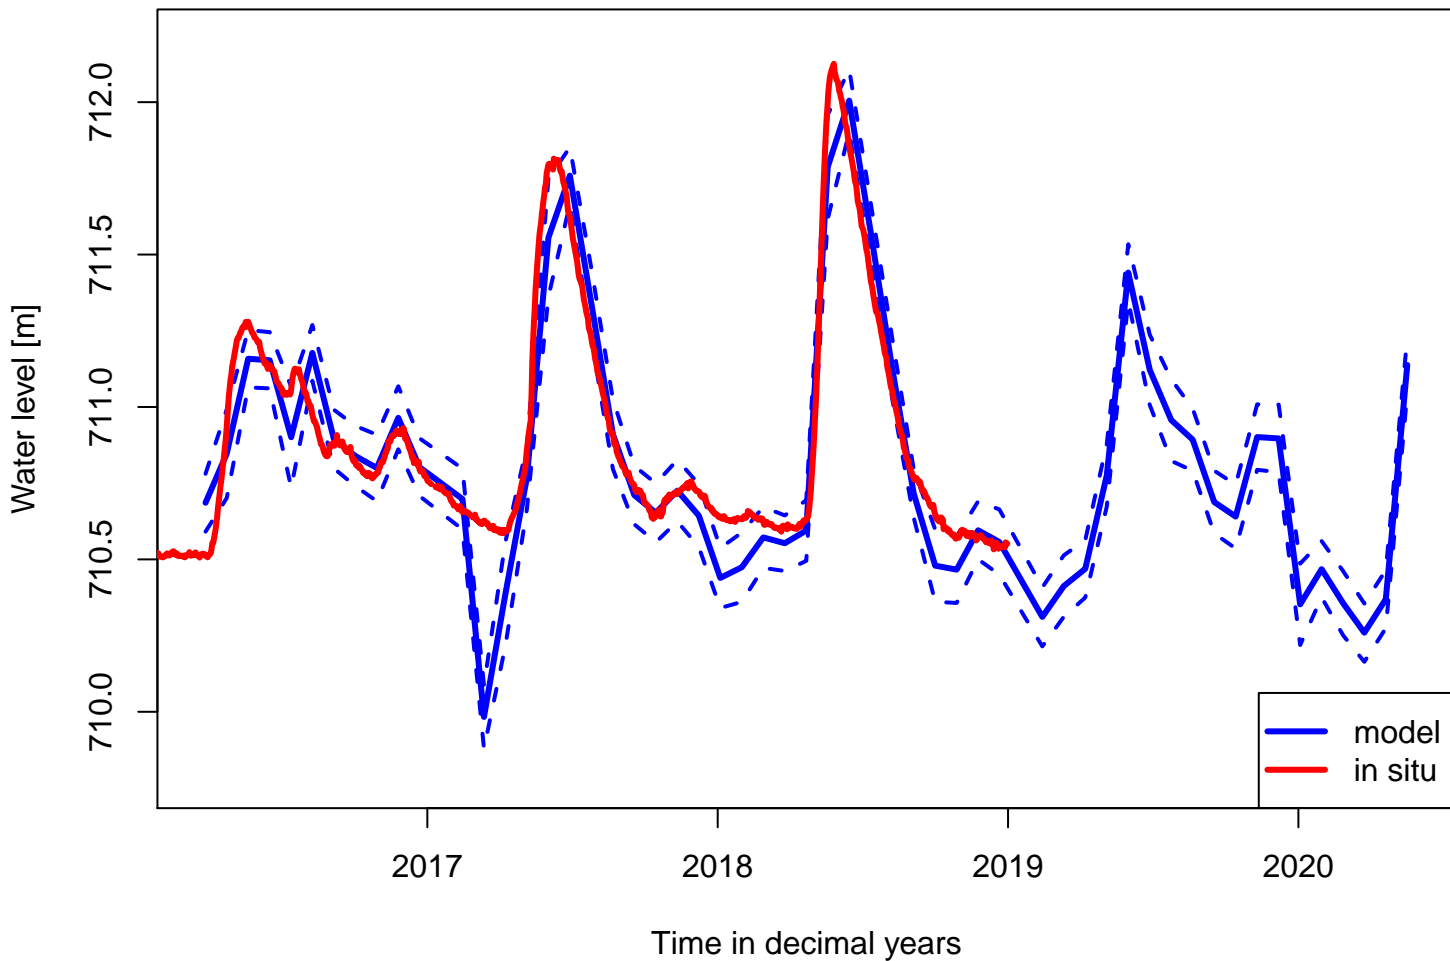

Supplement: s1 [file s1]

**lakename: Champlain lakeid: 64 lat: 44.05 lon: -73.45**

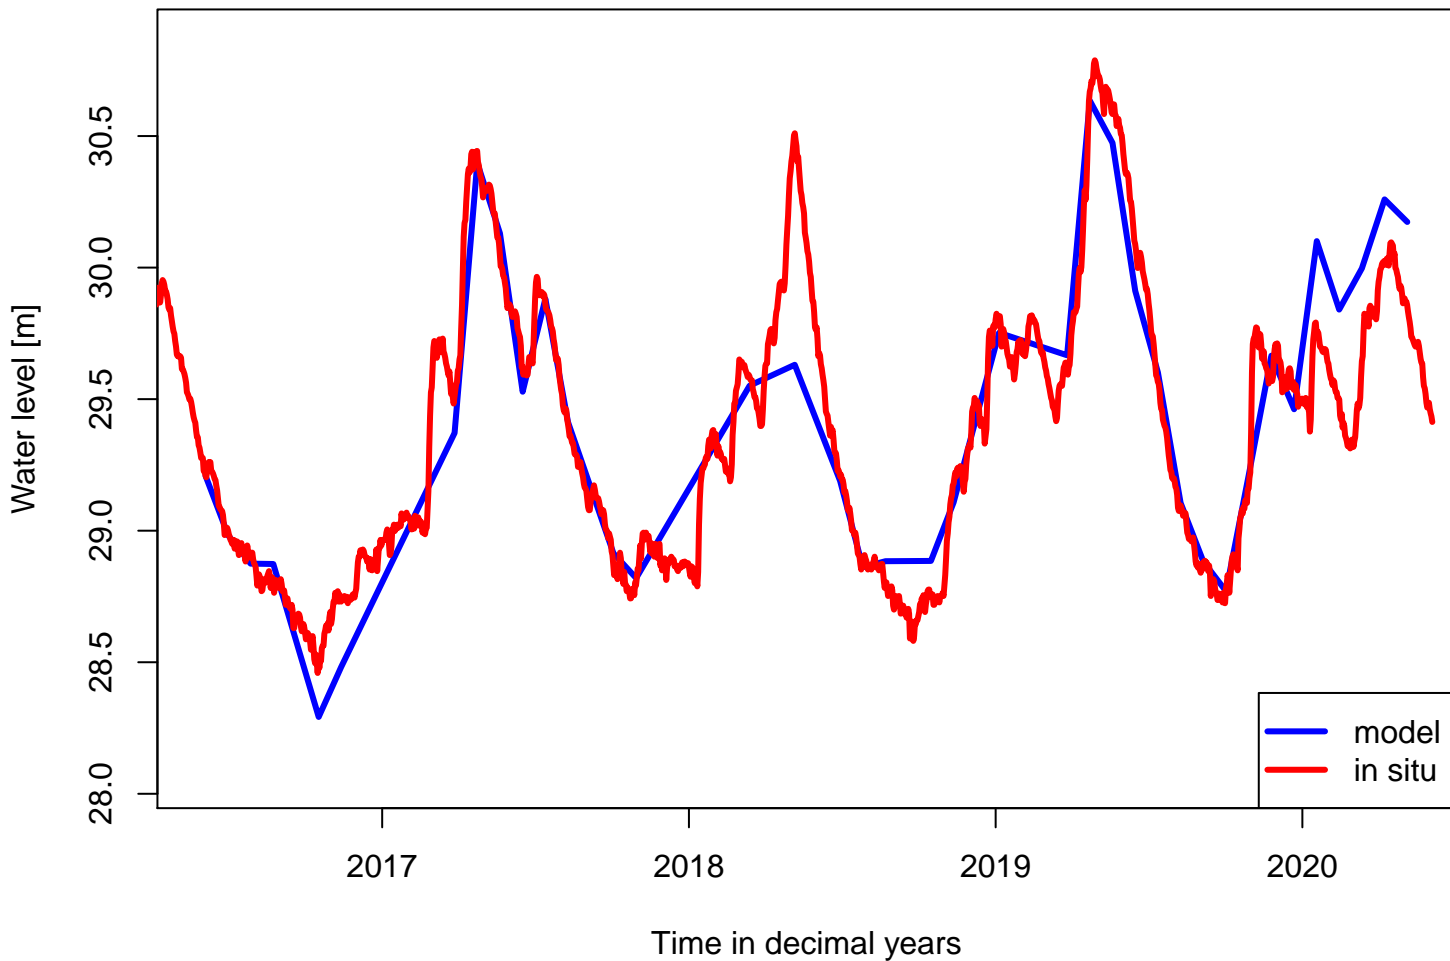

Supplement: s1 [file s1]

**lakename: lakeid: 306 lat: 63.65 lon: -95.85**

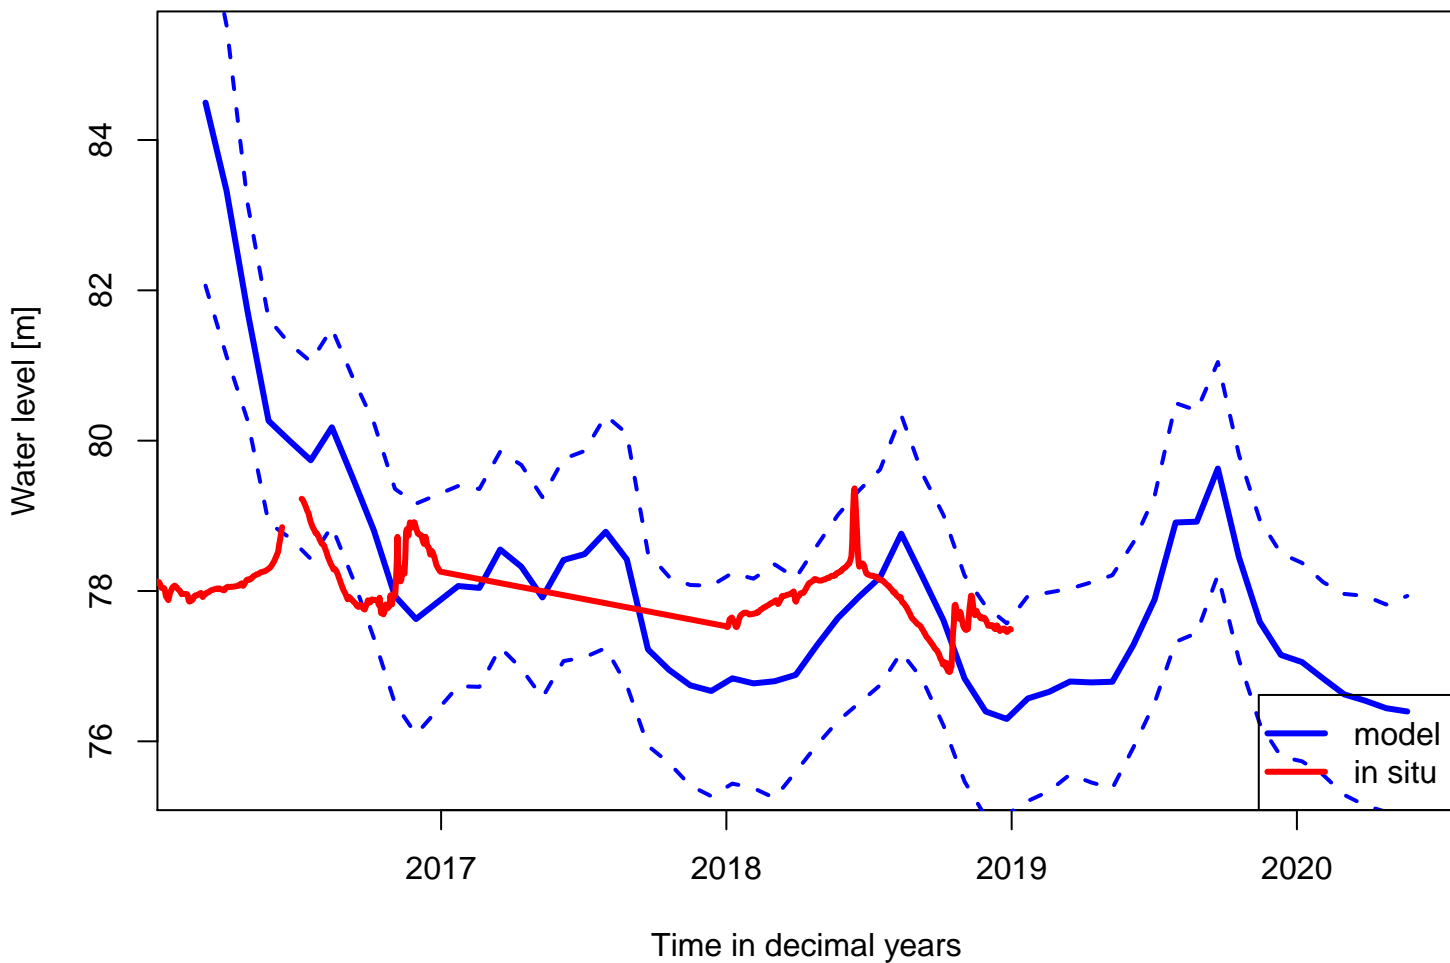

Supplement: s1 [file s1]

**lakename: Quesnel lakeid: 619 lat: 52.57 lon: -121.5**

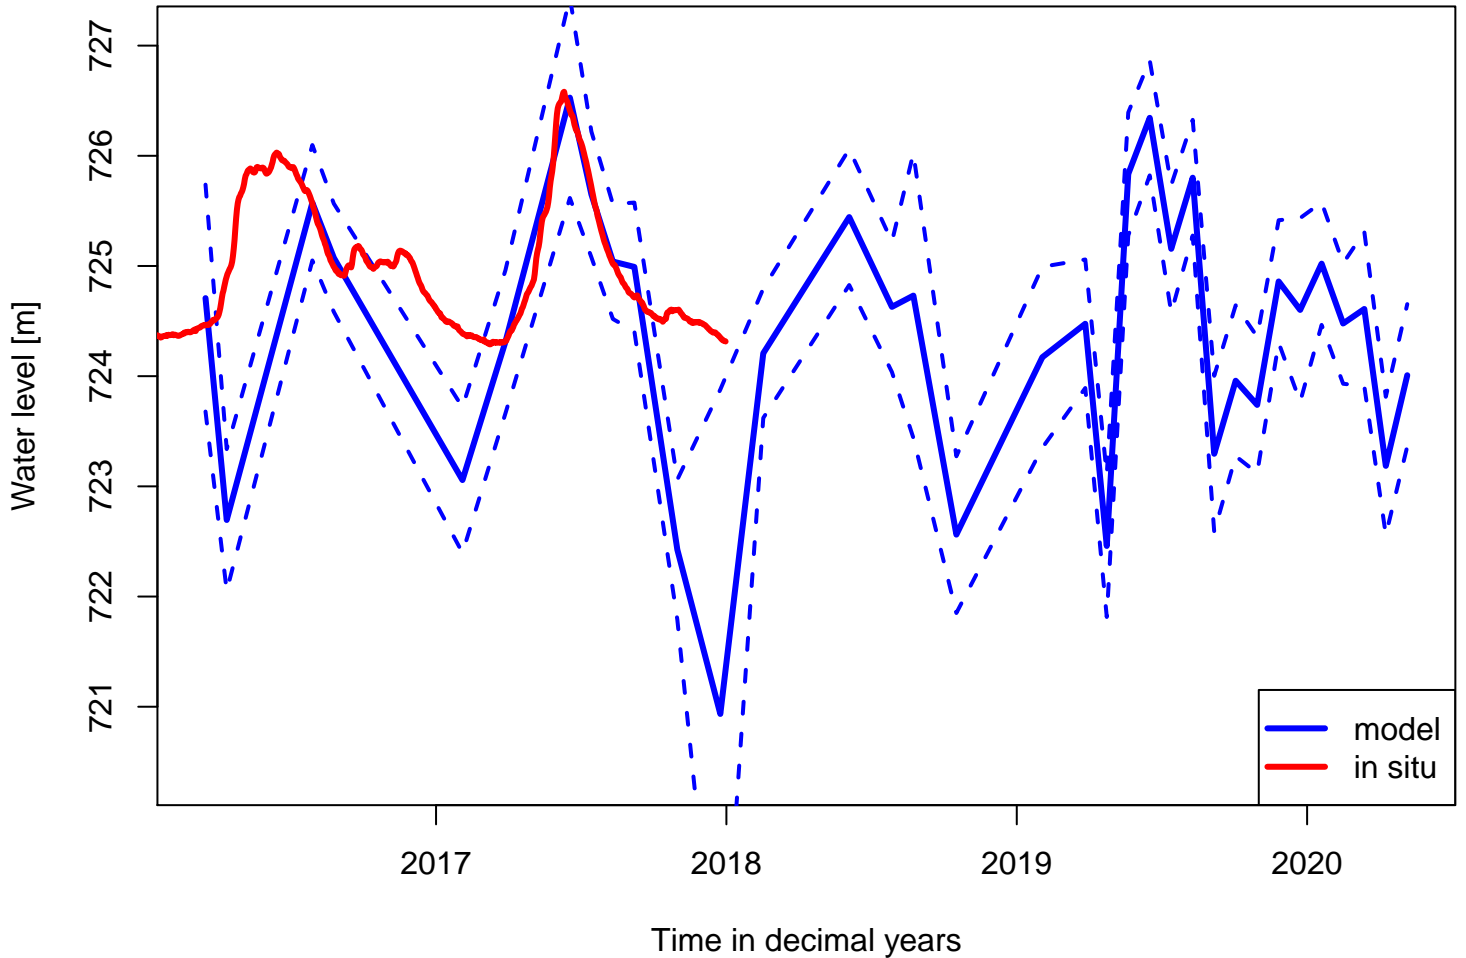

Supplement: s1 [file s1]

**lakename: John H. Kerr Reservoir lakeid: 805 lat: 36.6 lon: -78.3**

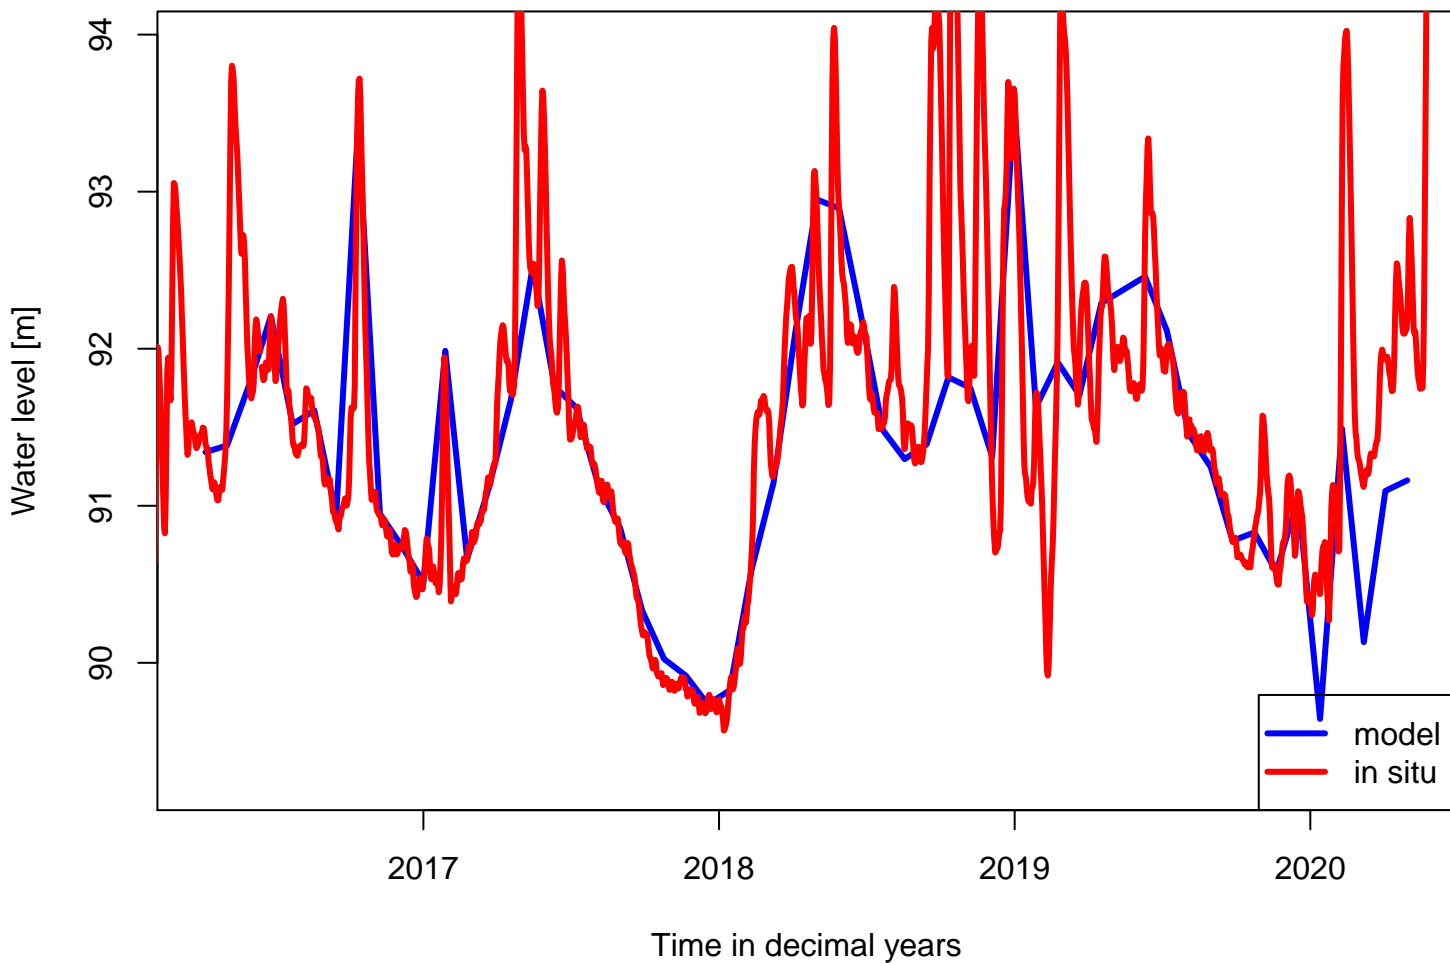

Supplement: s1 [file s1]

**lakename: Grand Lake lakeid: 8876 lat: 45.18 lon: -67.78**

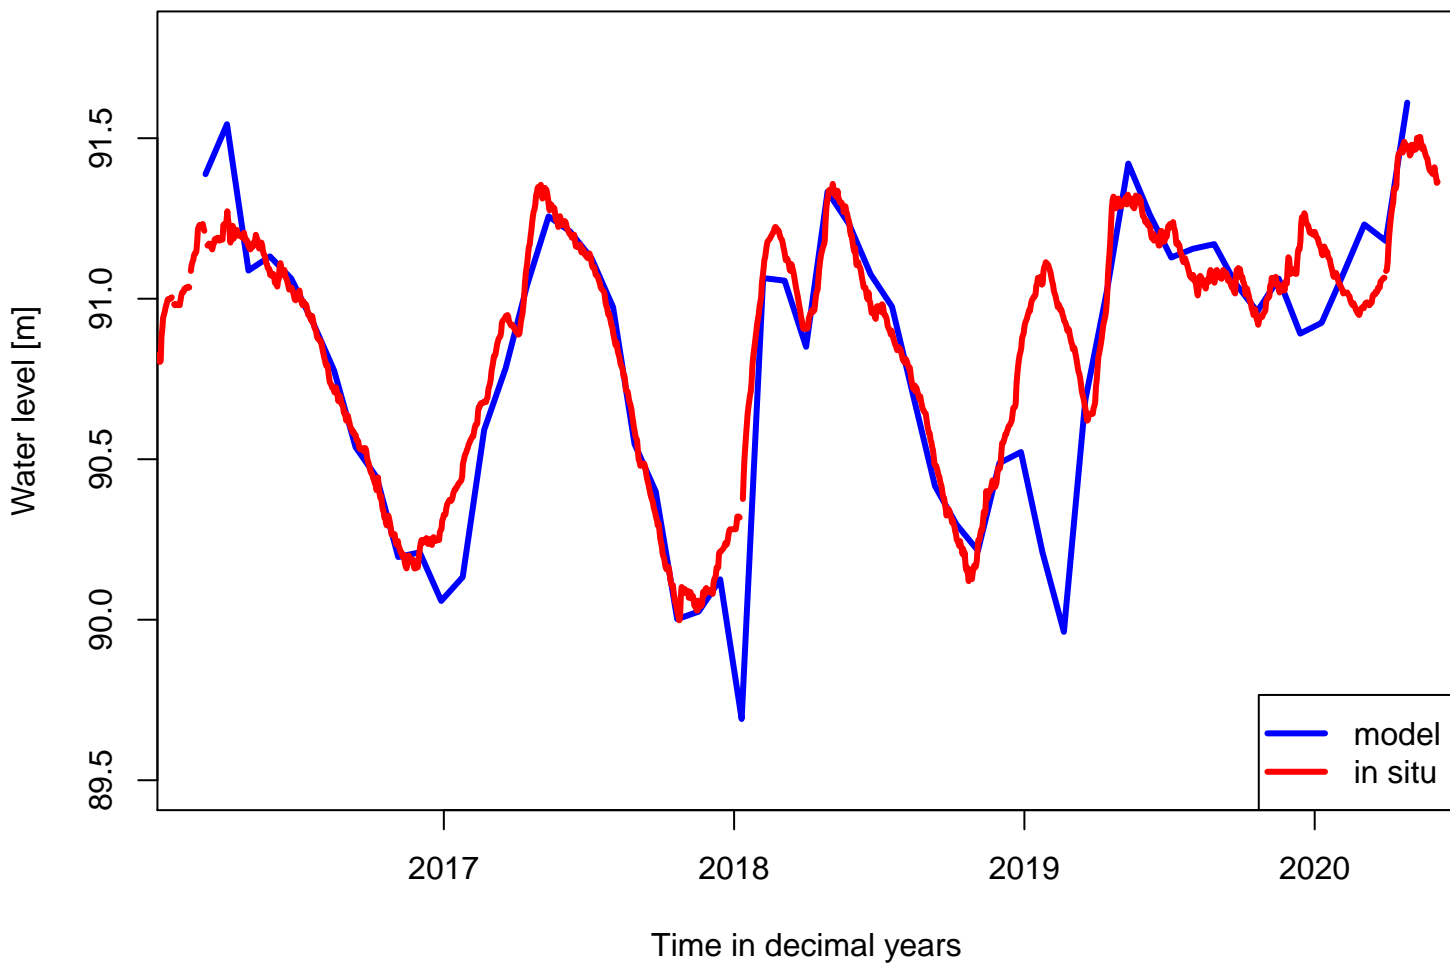

Supplement: s1 [file s1]

**lakename: Dauphin lakeid: 641 lat: 51.44 lon: -99.95**

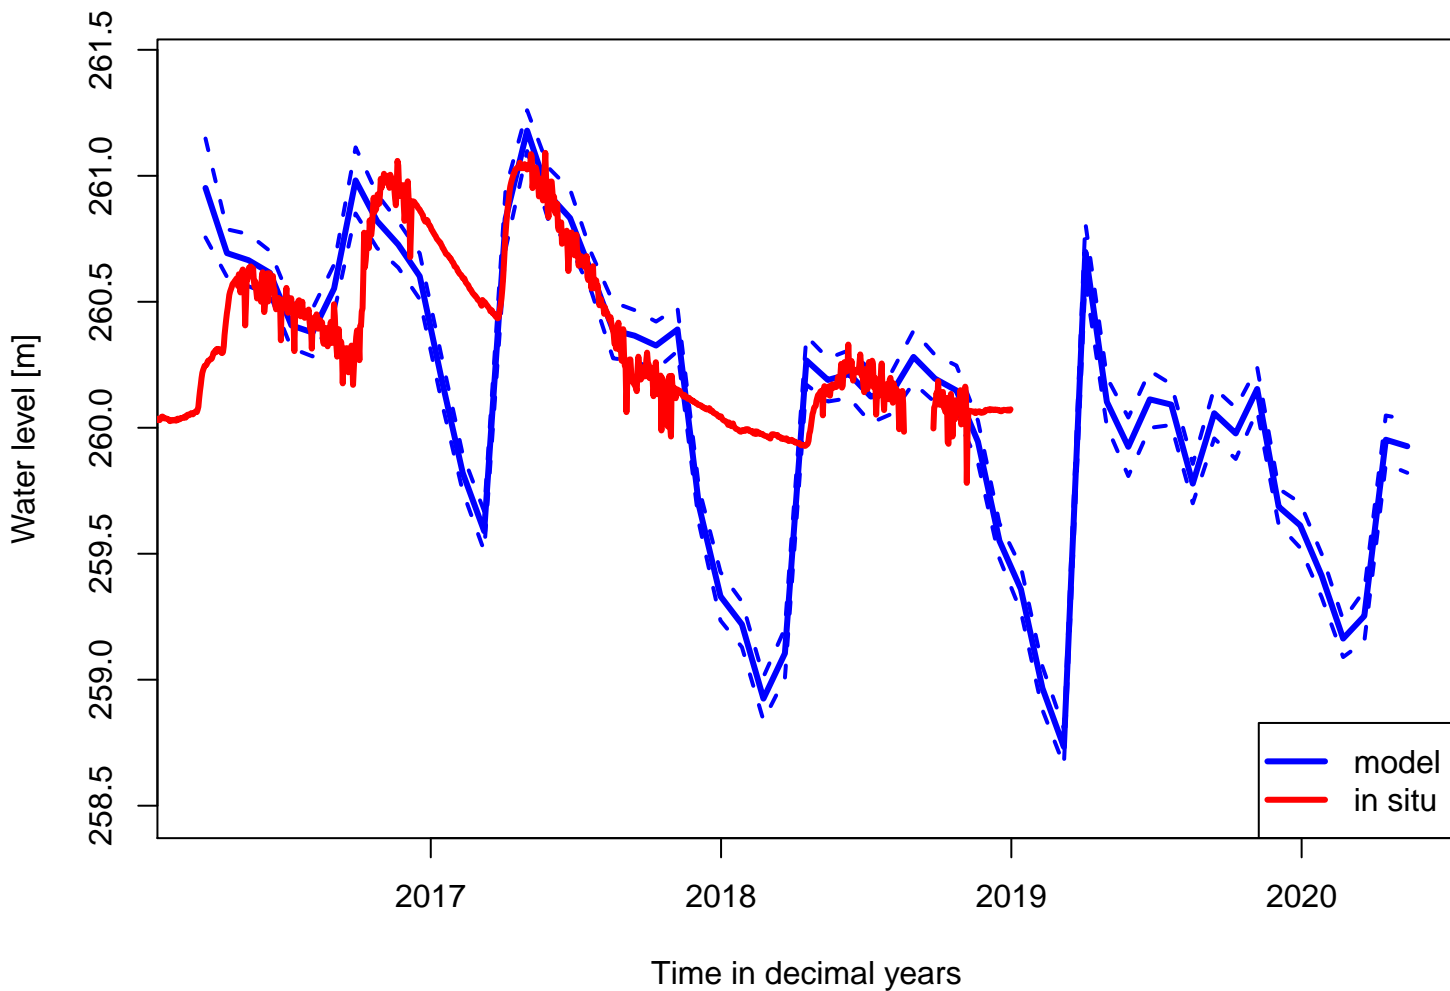

Supplement: s1 [file s1]

**lakename: Tobin lakeid: 589 lat: 53.66 lon: -103.4**

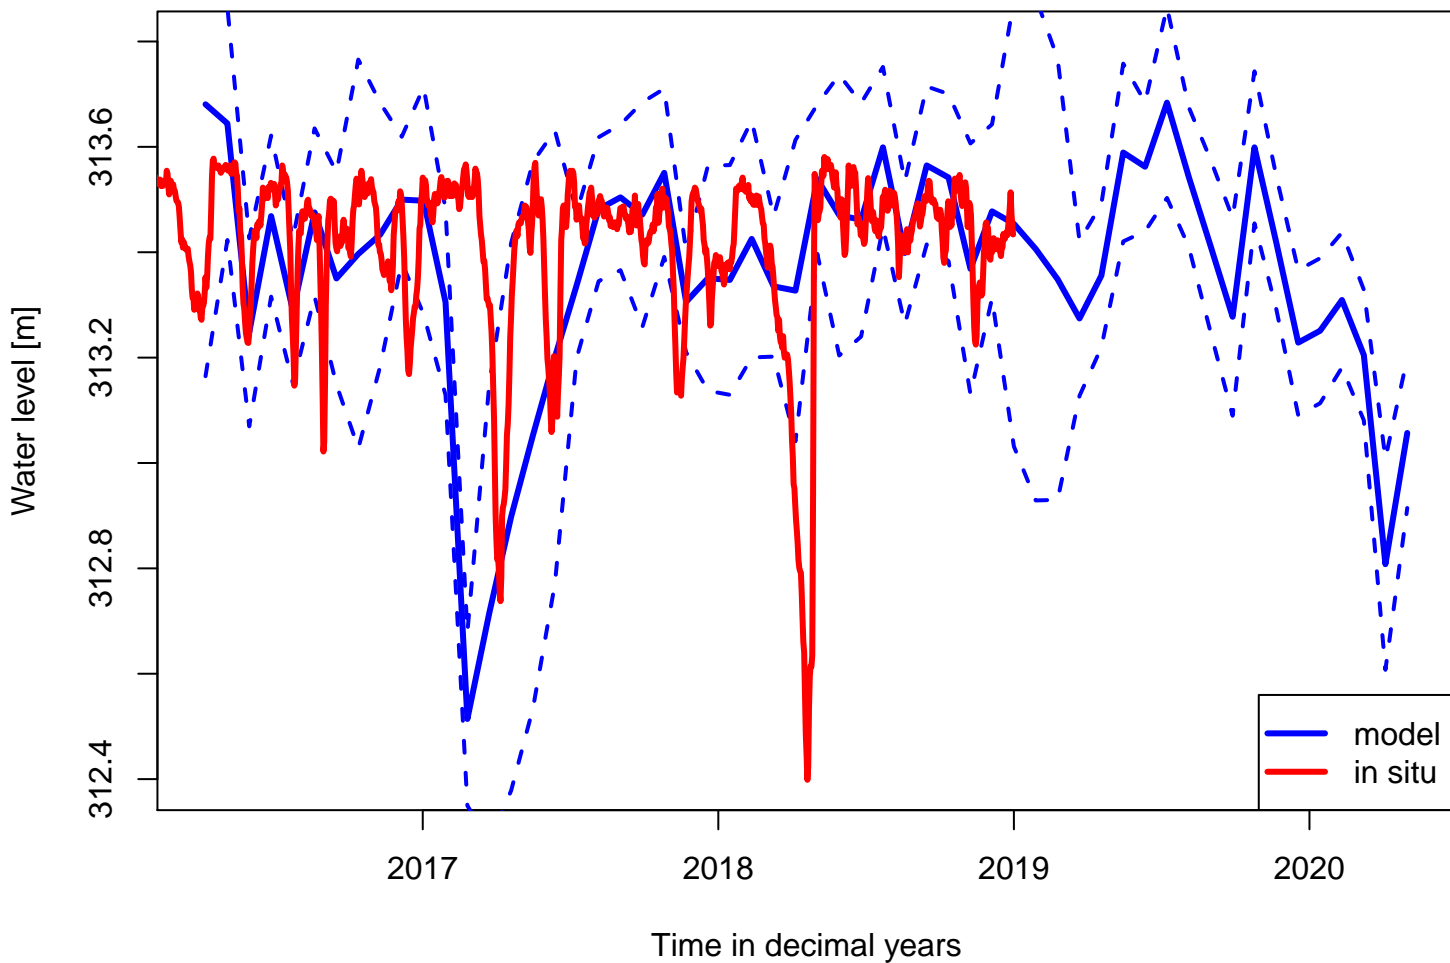

Supplement: s1 [file s1]

**lakename: Reindeer lakeid: 38 lat: 57.88 lon: -101.7**

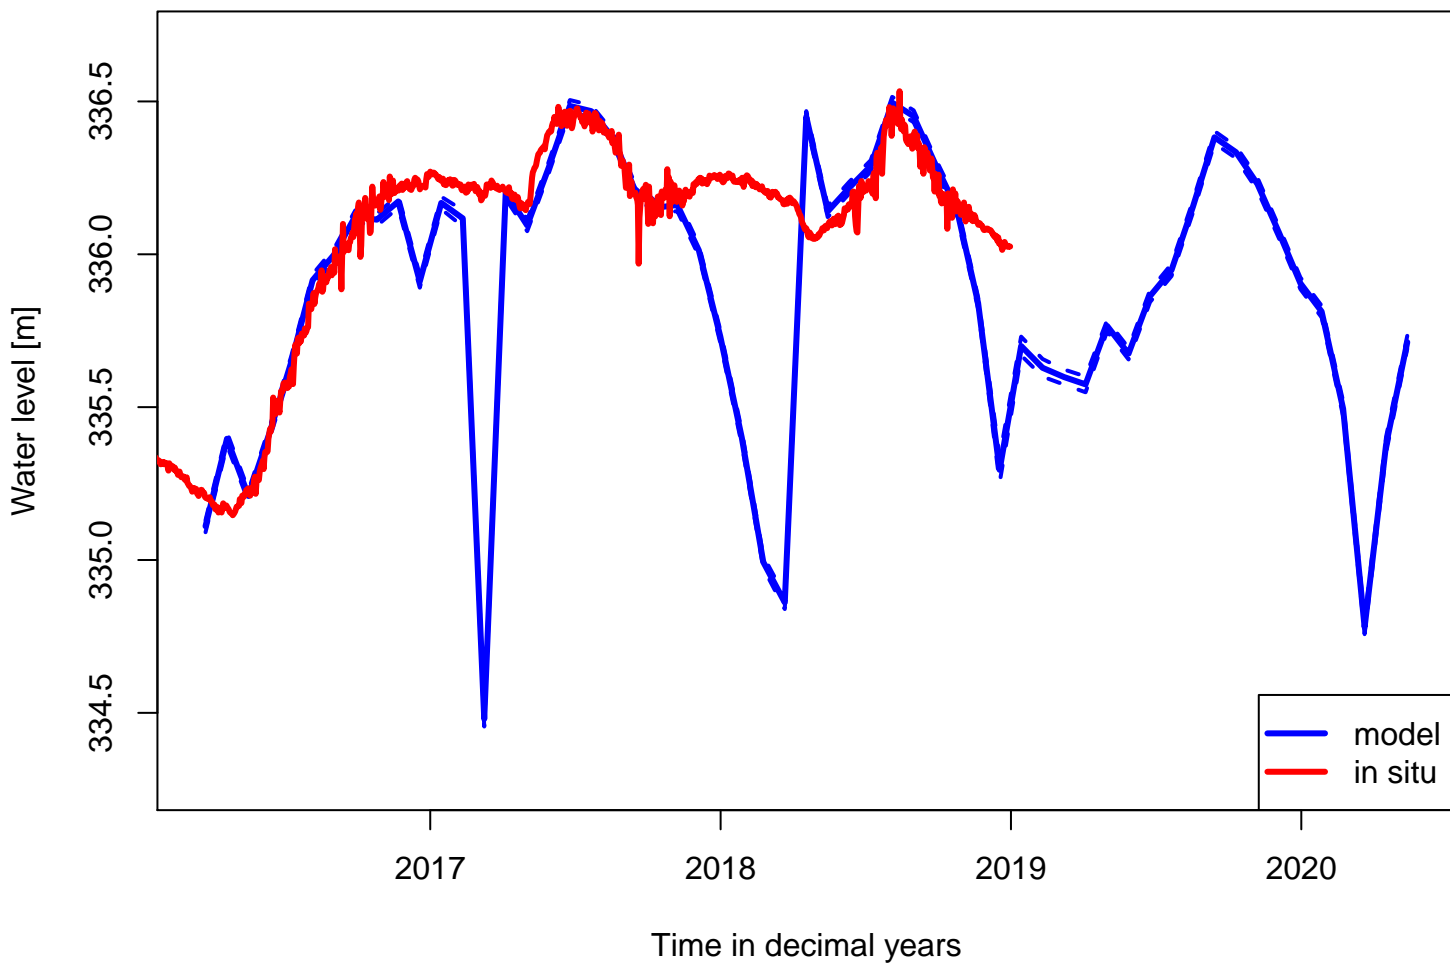

Supplement: s1 [file s1]

**lakename: lakeid: 4688 lat: 60.16 lon: -134.7**

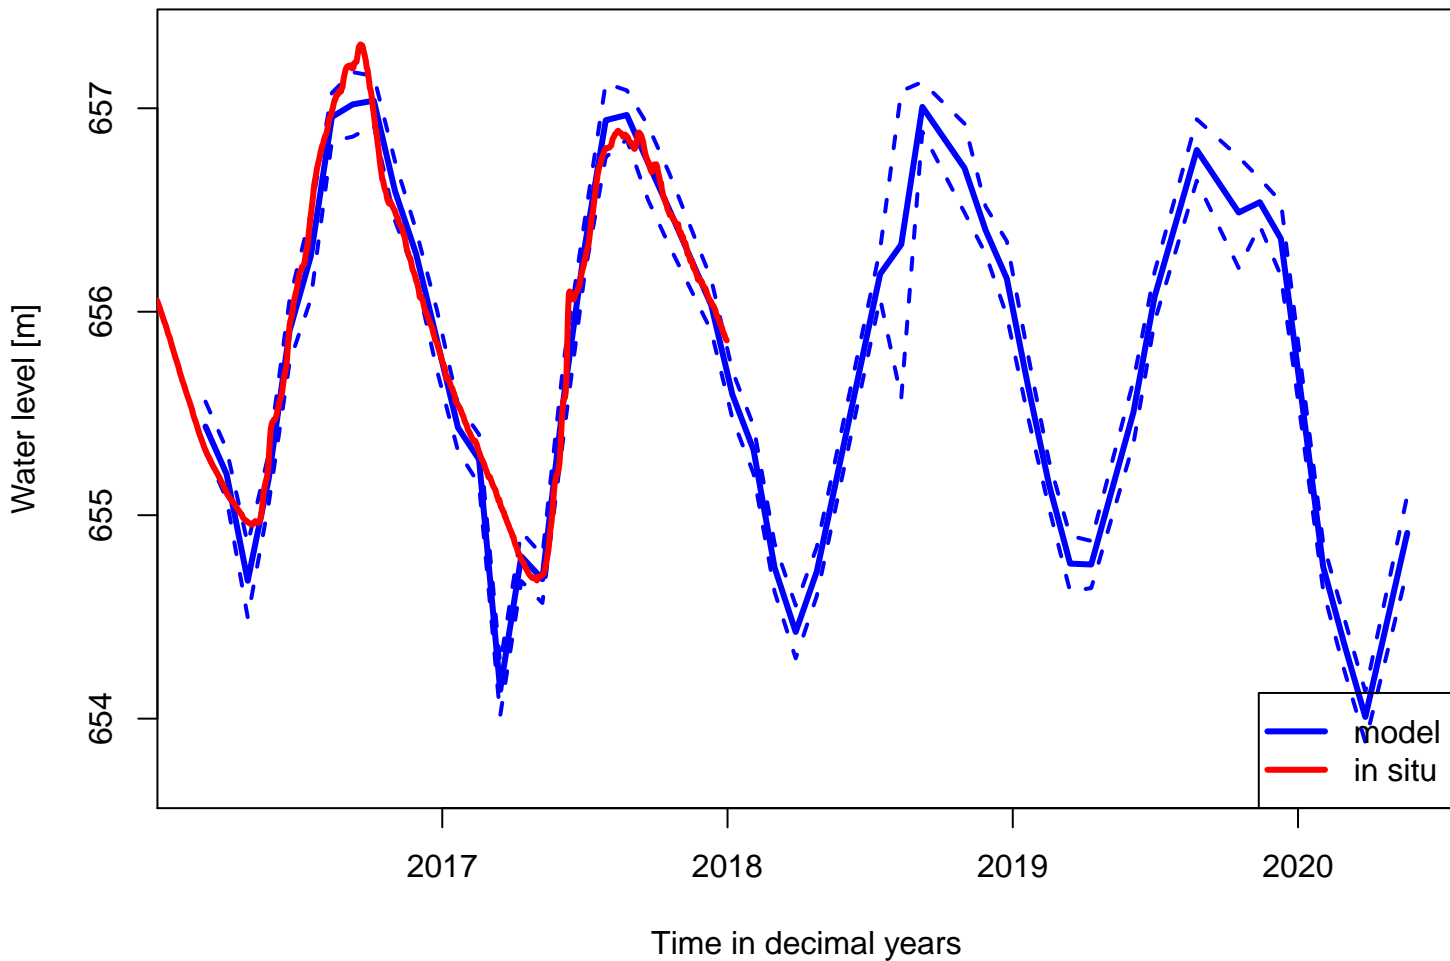

Supplement: s1 [file s1]

**lakename: Lake Tawakoni lakeid: 832 lat: 32.81 lon: -95.92**

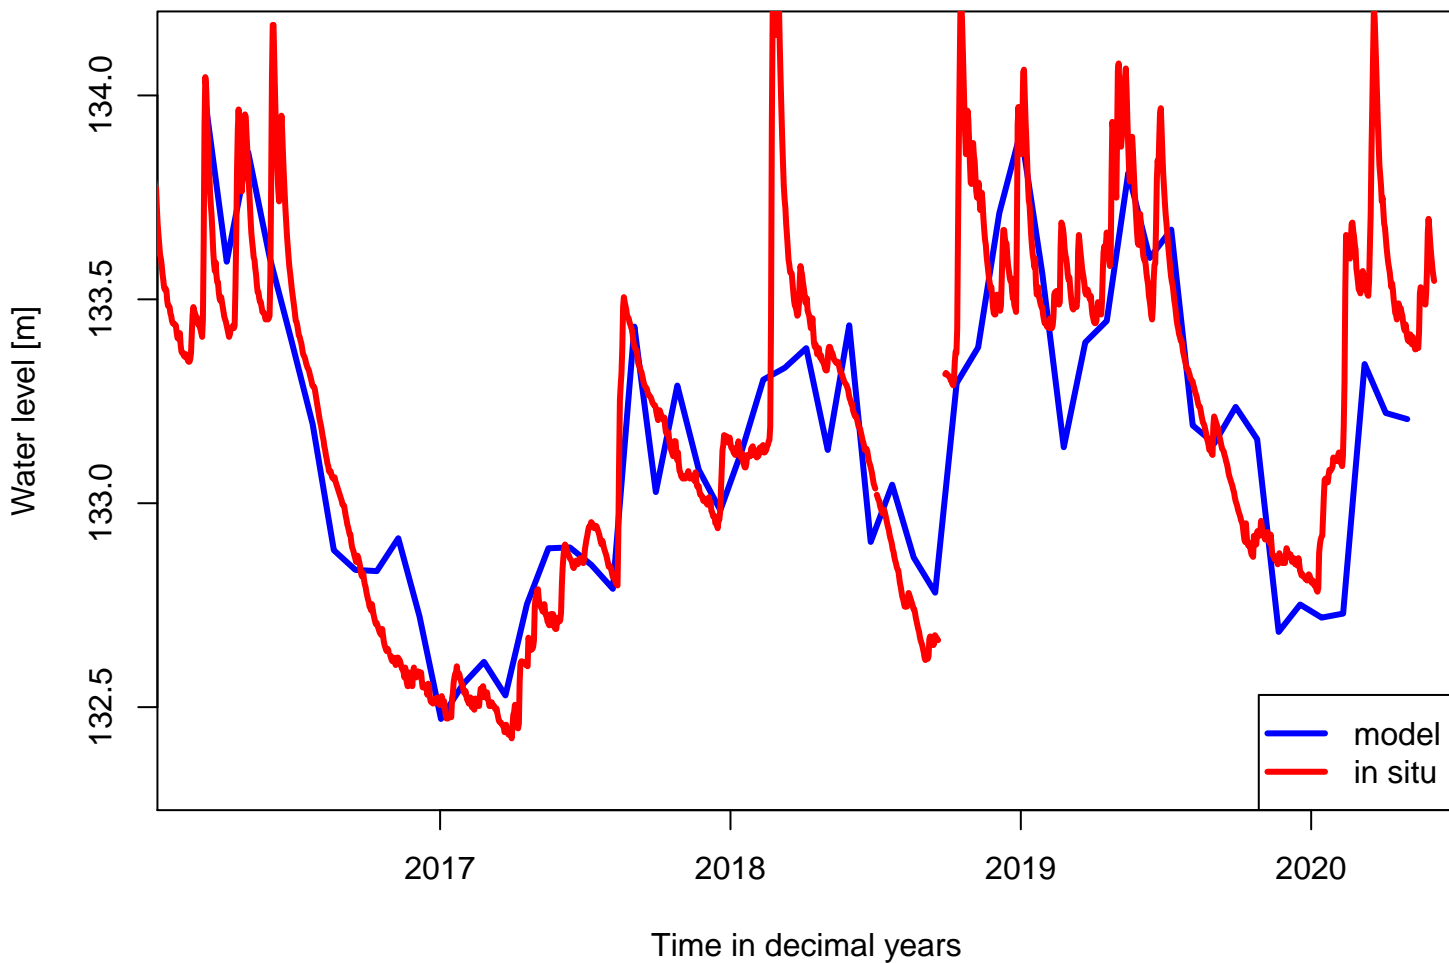

Supplement: s1 [file s1]

**lakename: Red lakeid: 650 lat: 51.03 lon: -93.86**

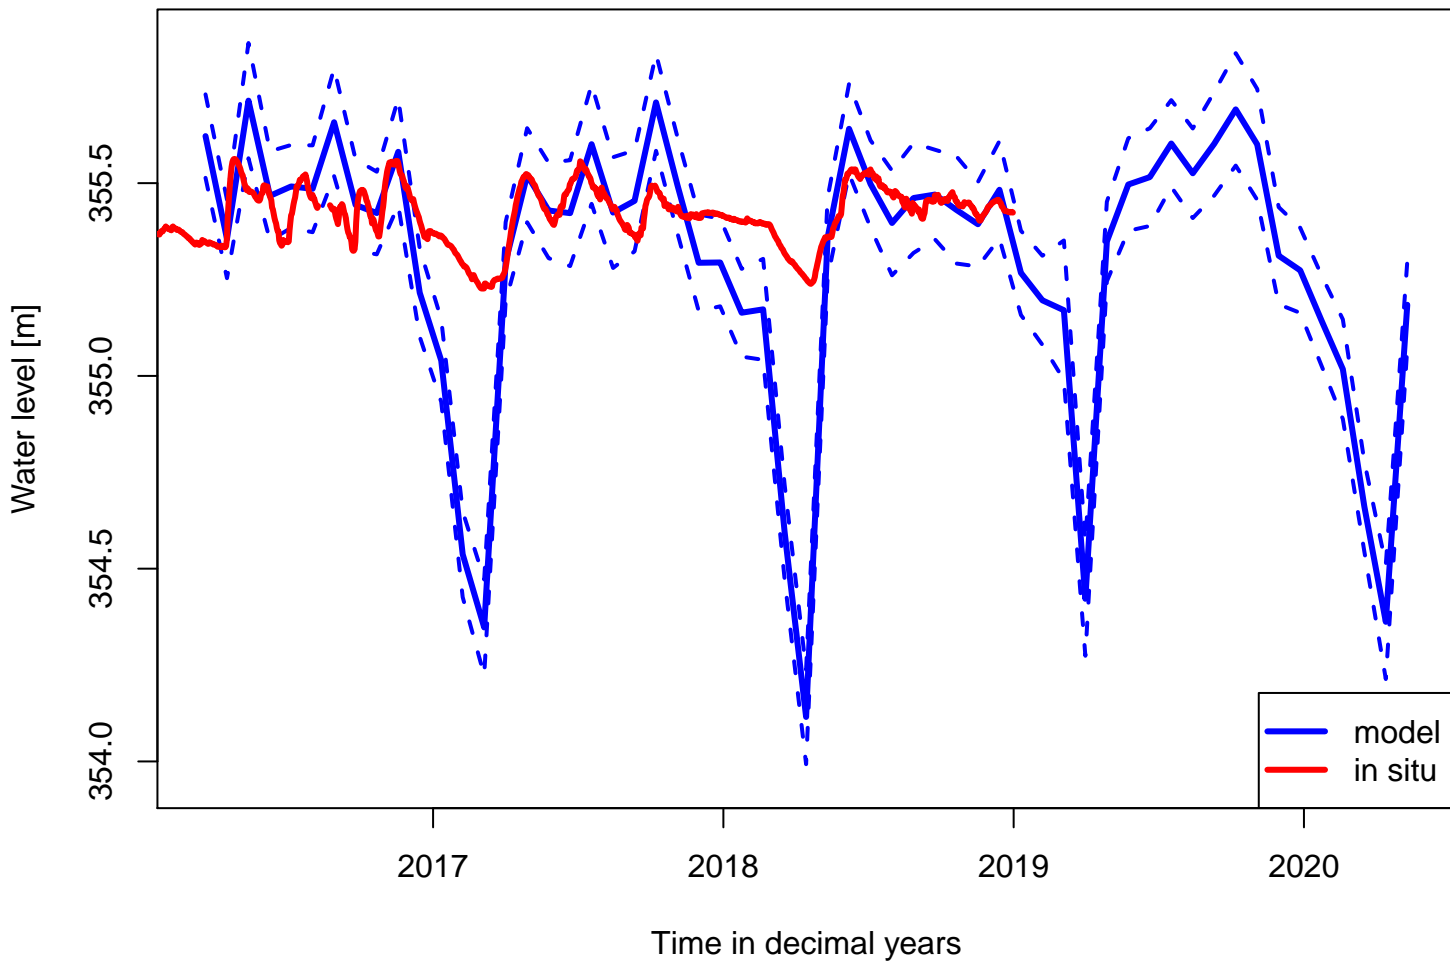

Supplement: s1 [file s1]

**lakename: Winnipegosis lakeid: 52 lat: 52.97 lon: -101**

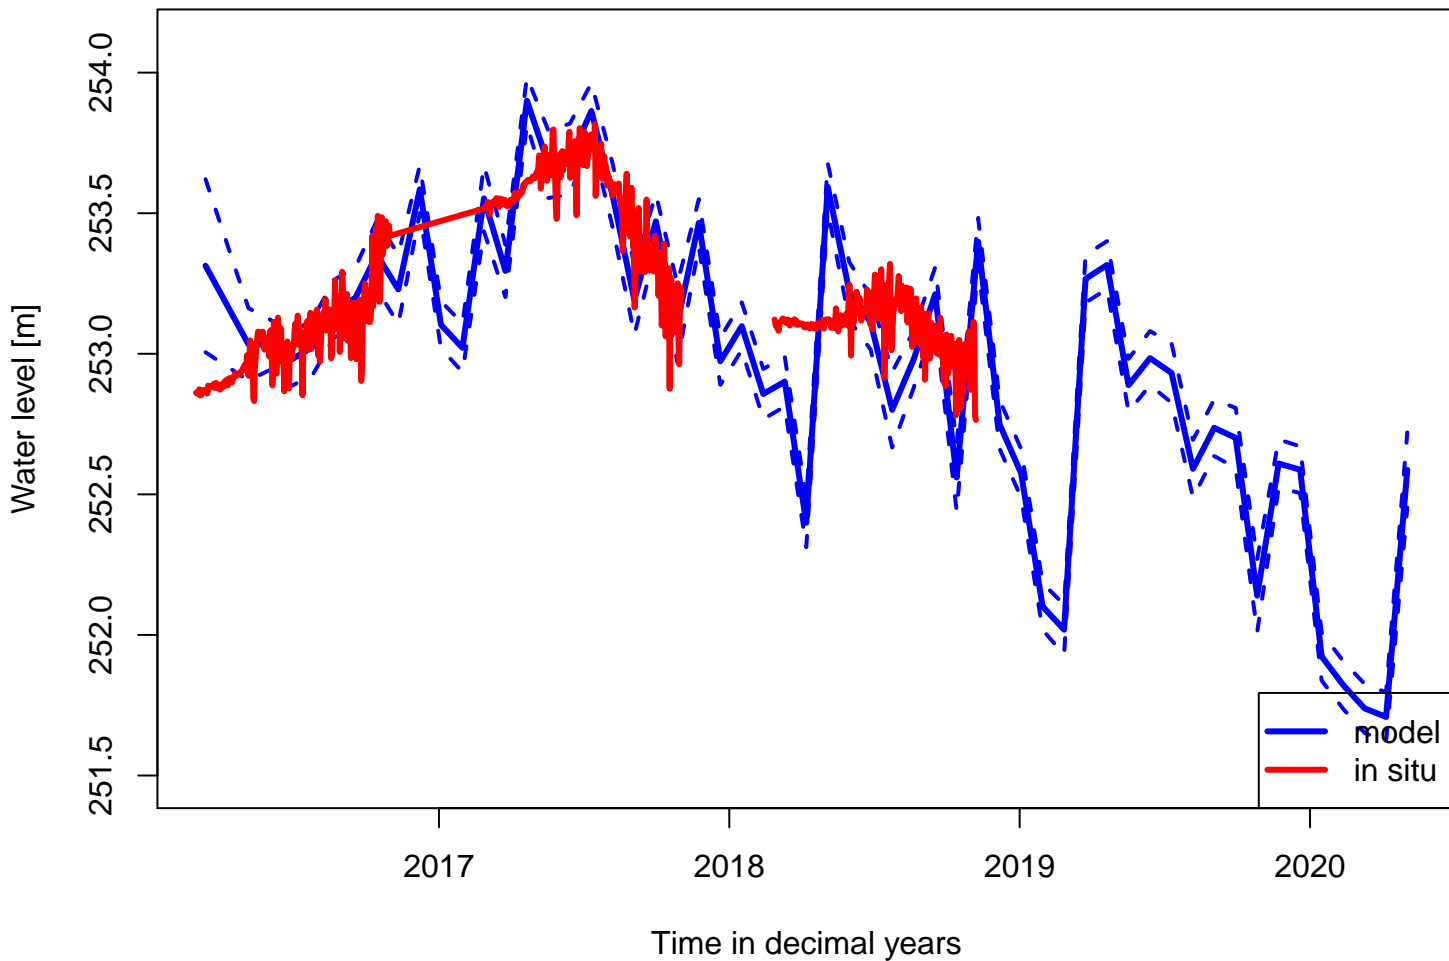

Supplement: s1 [file s1]

**lakename: Winnipegosis lakeid: 52 lat: 51.65 lon: -99.92**

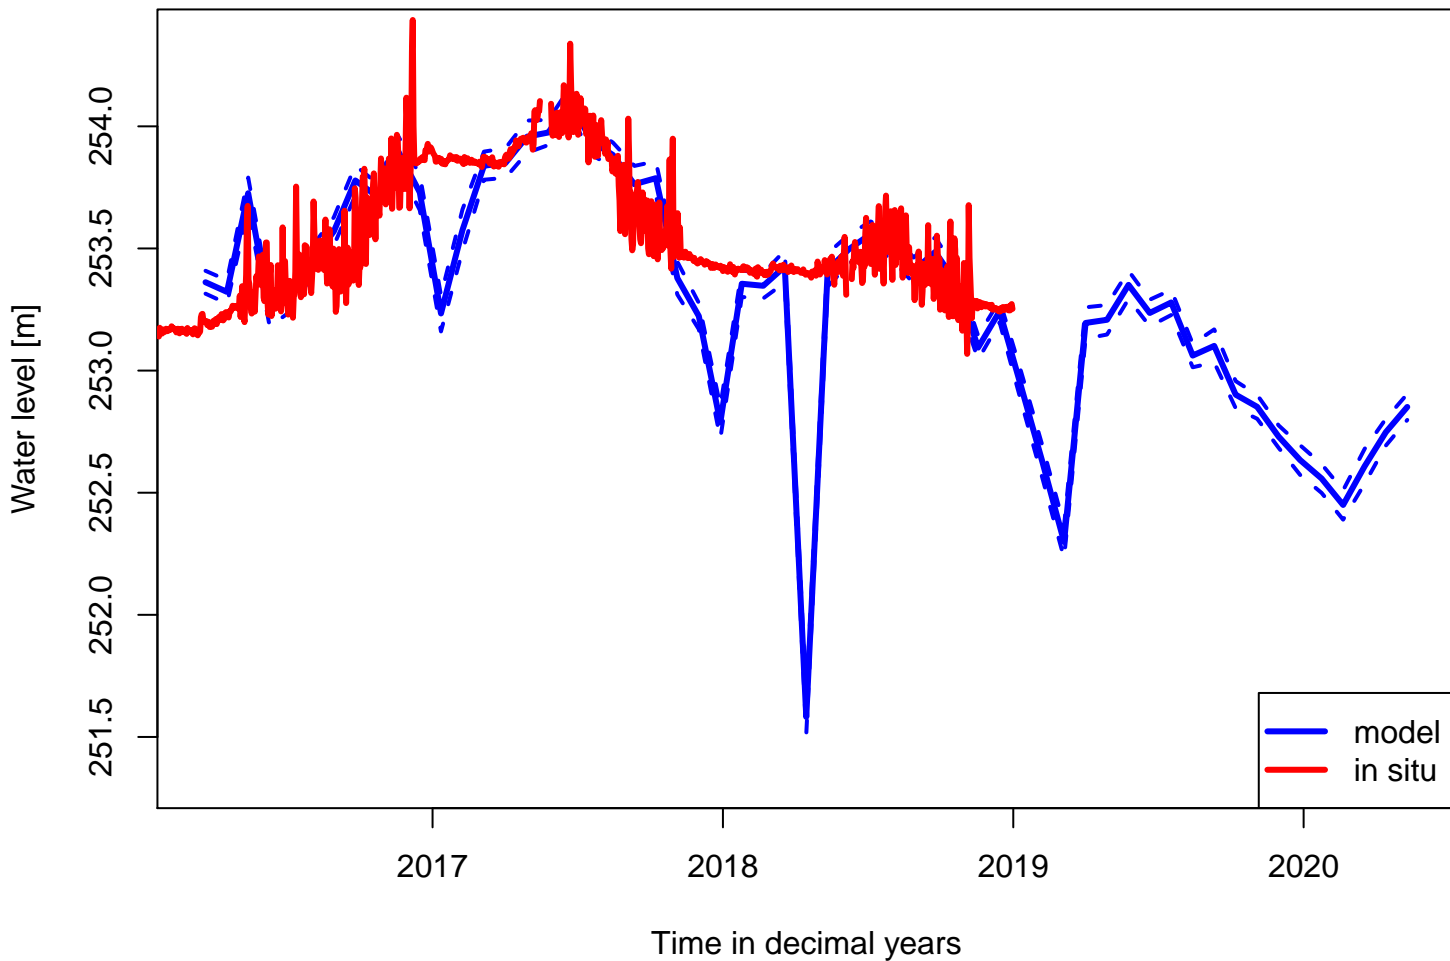

Supplement: s1 [file s1]

**lakename: Woods lakeid: 57 lat: 49.33 lon: -94.85**

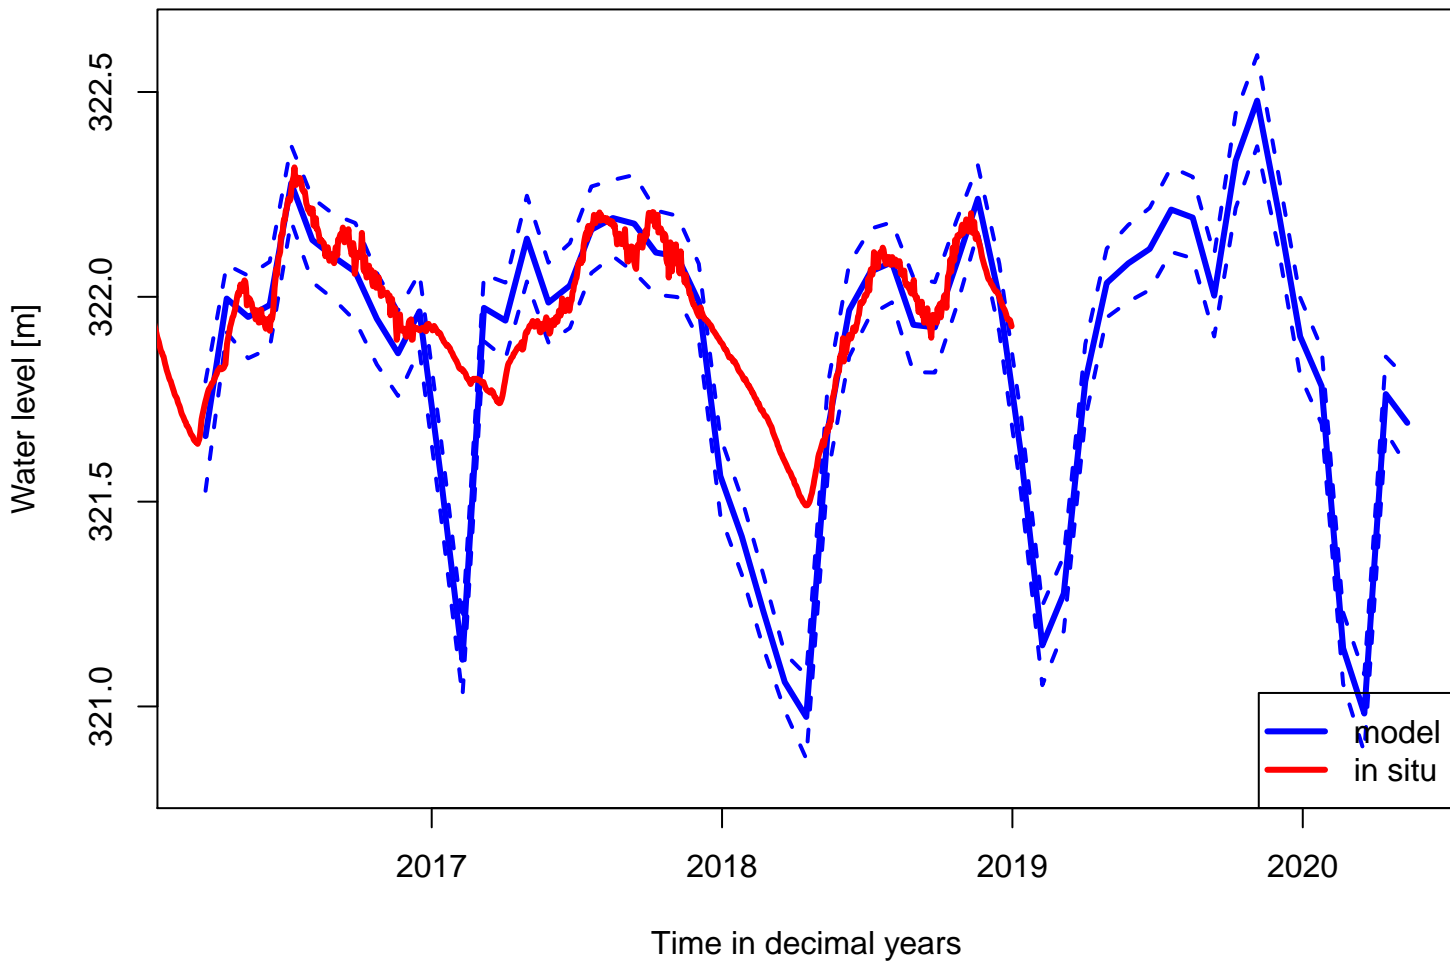

Supplement: s1 [file s1]

**lakename: lakeid: 377 lat: 60.94 lon: -117.4**

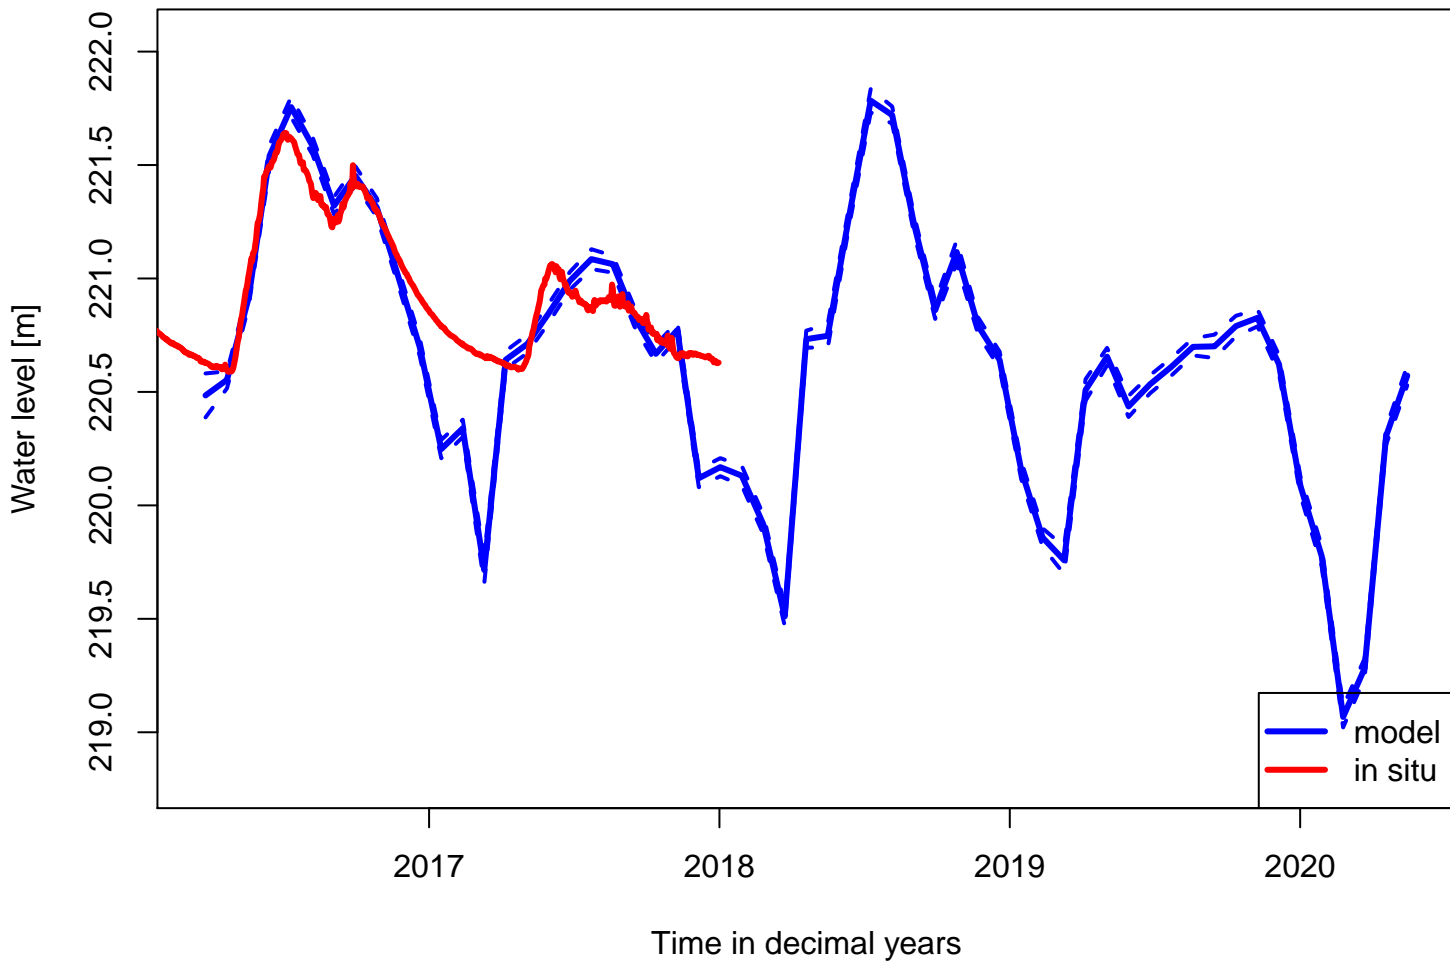

Supplement: s1 [file s1]

**lakename: Calcasieu Lake lakeid: 844 lat: 30.03 lon: -93.3**

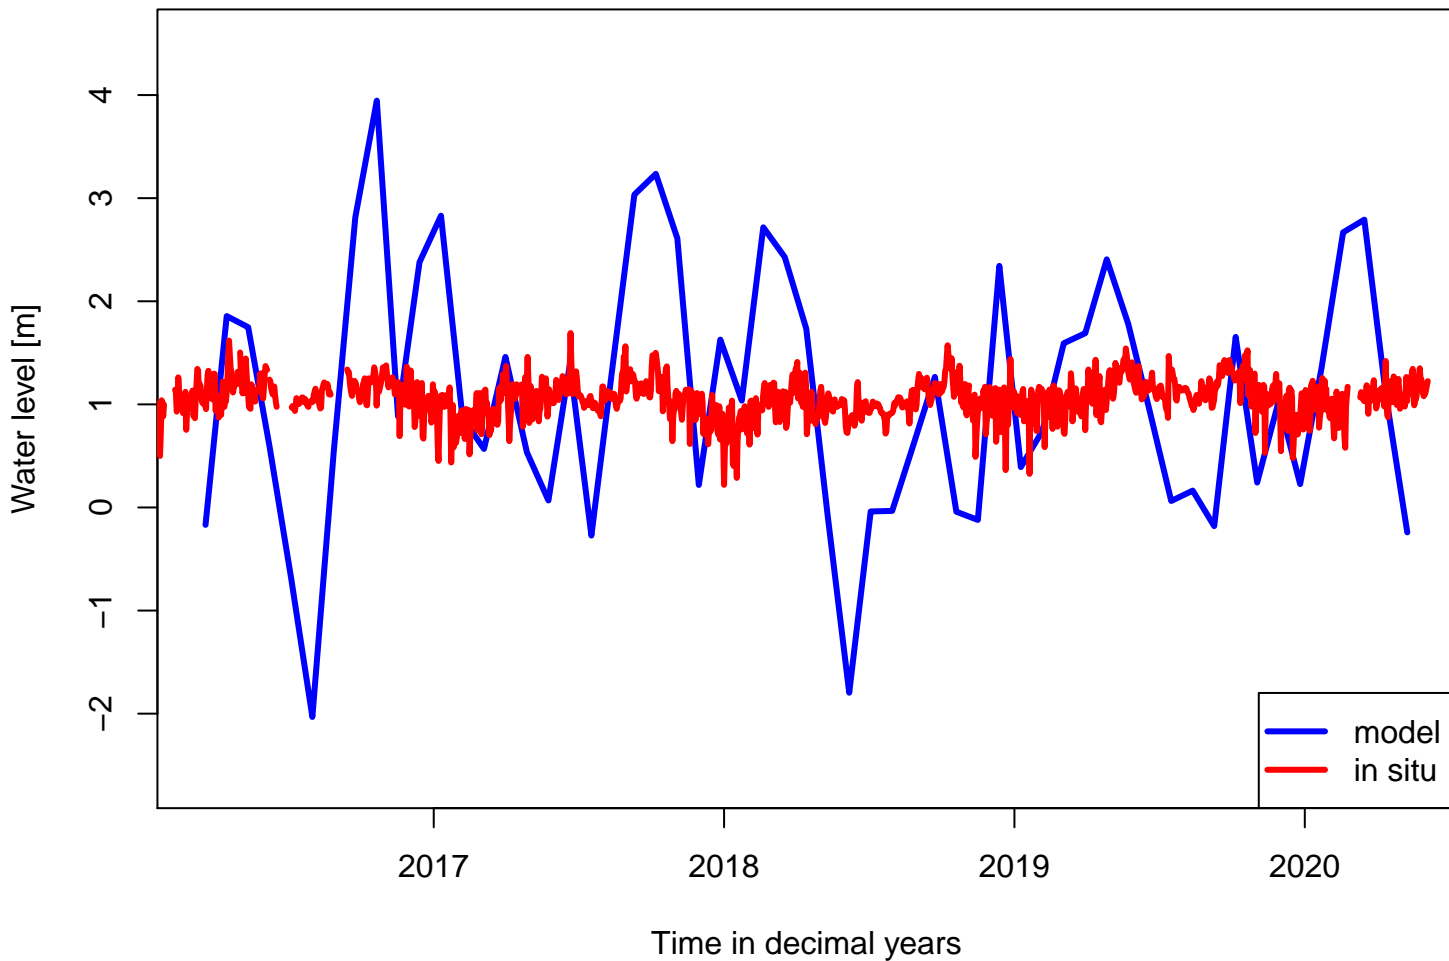

Supplement: s1 [file s1]

**lakename: Rainy lakeid: 710 lat: 48.7 lon: -92.96**

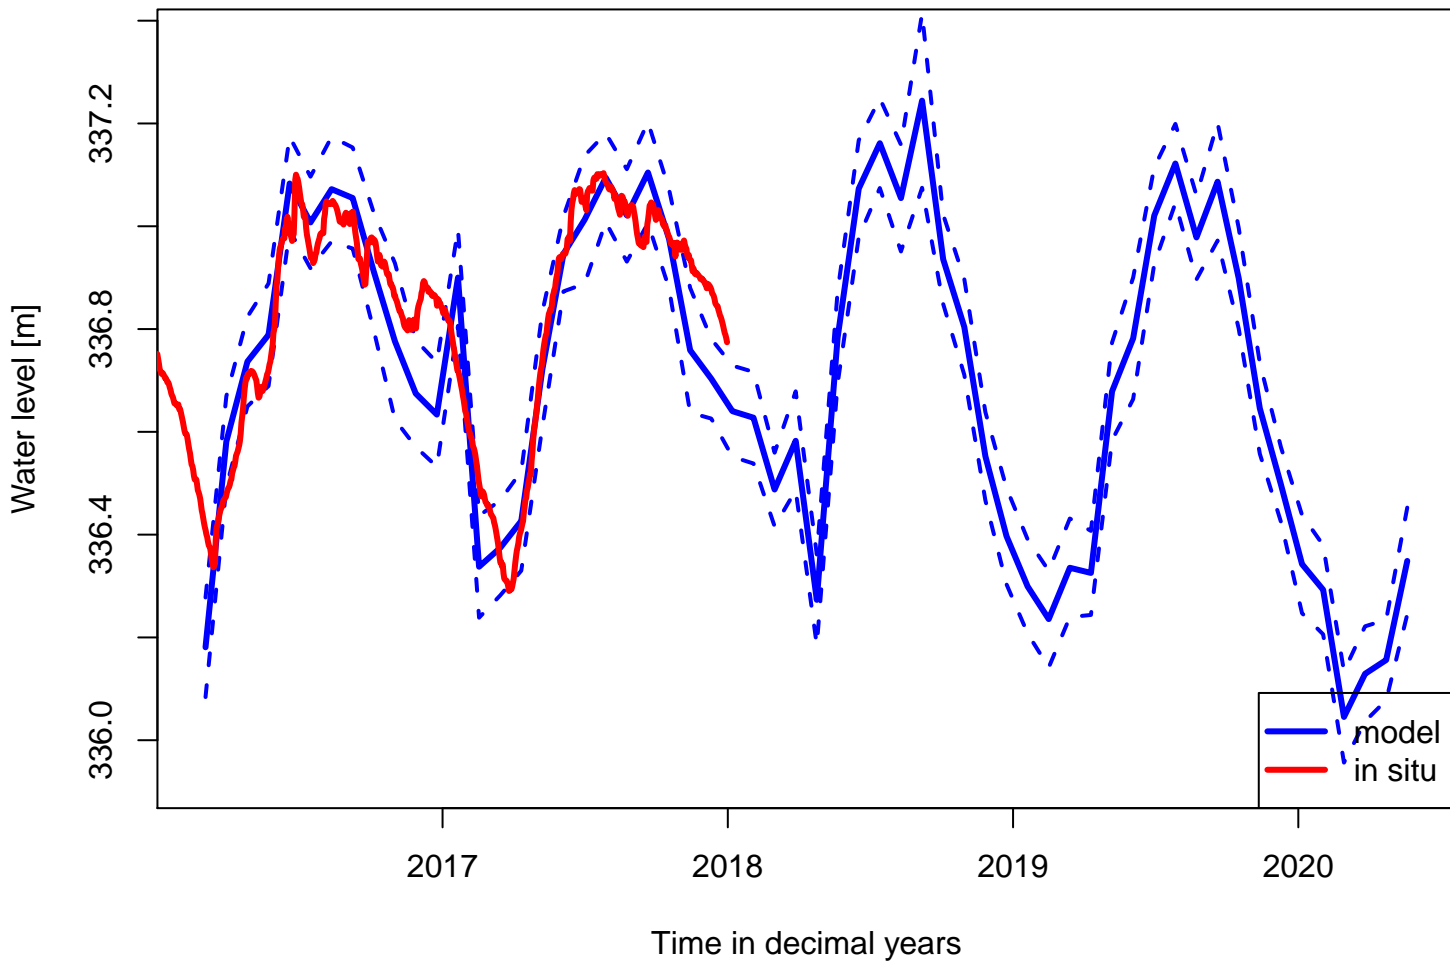

Supplement: s1 [file s1]

**lakename: Moose lakeid: 48 lat: 53.94 lon: -100.1**

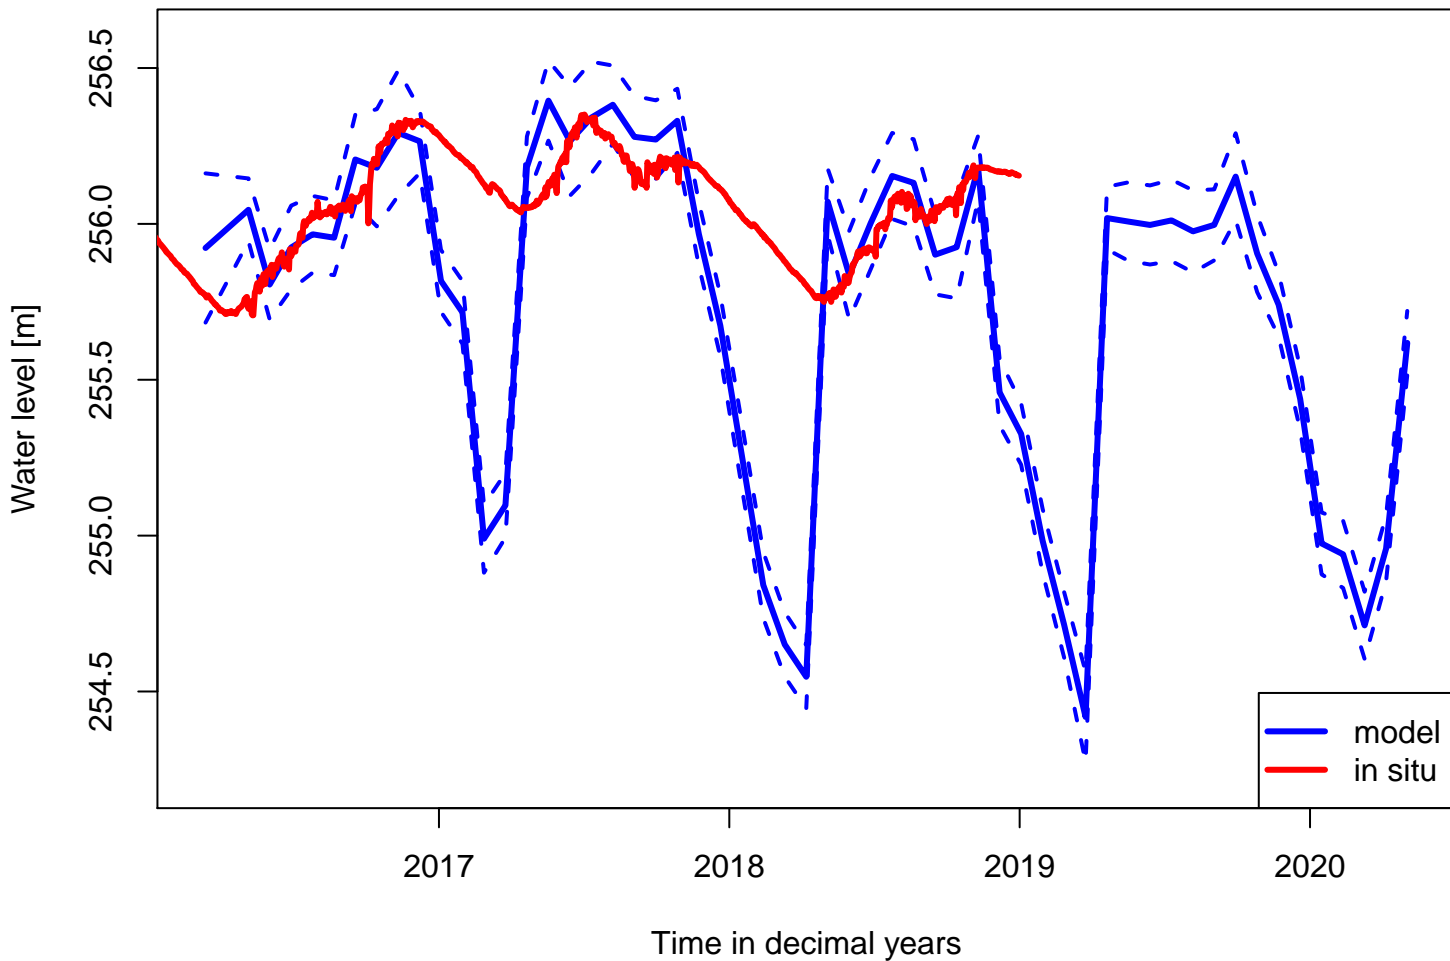

Supplement: s1 [file s1]

**lakename: Simcoe lakeid: 759 lat: 44.5 lon: -79.47**

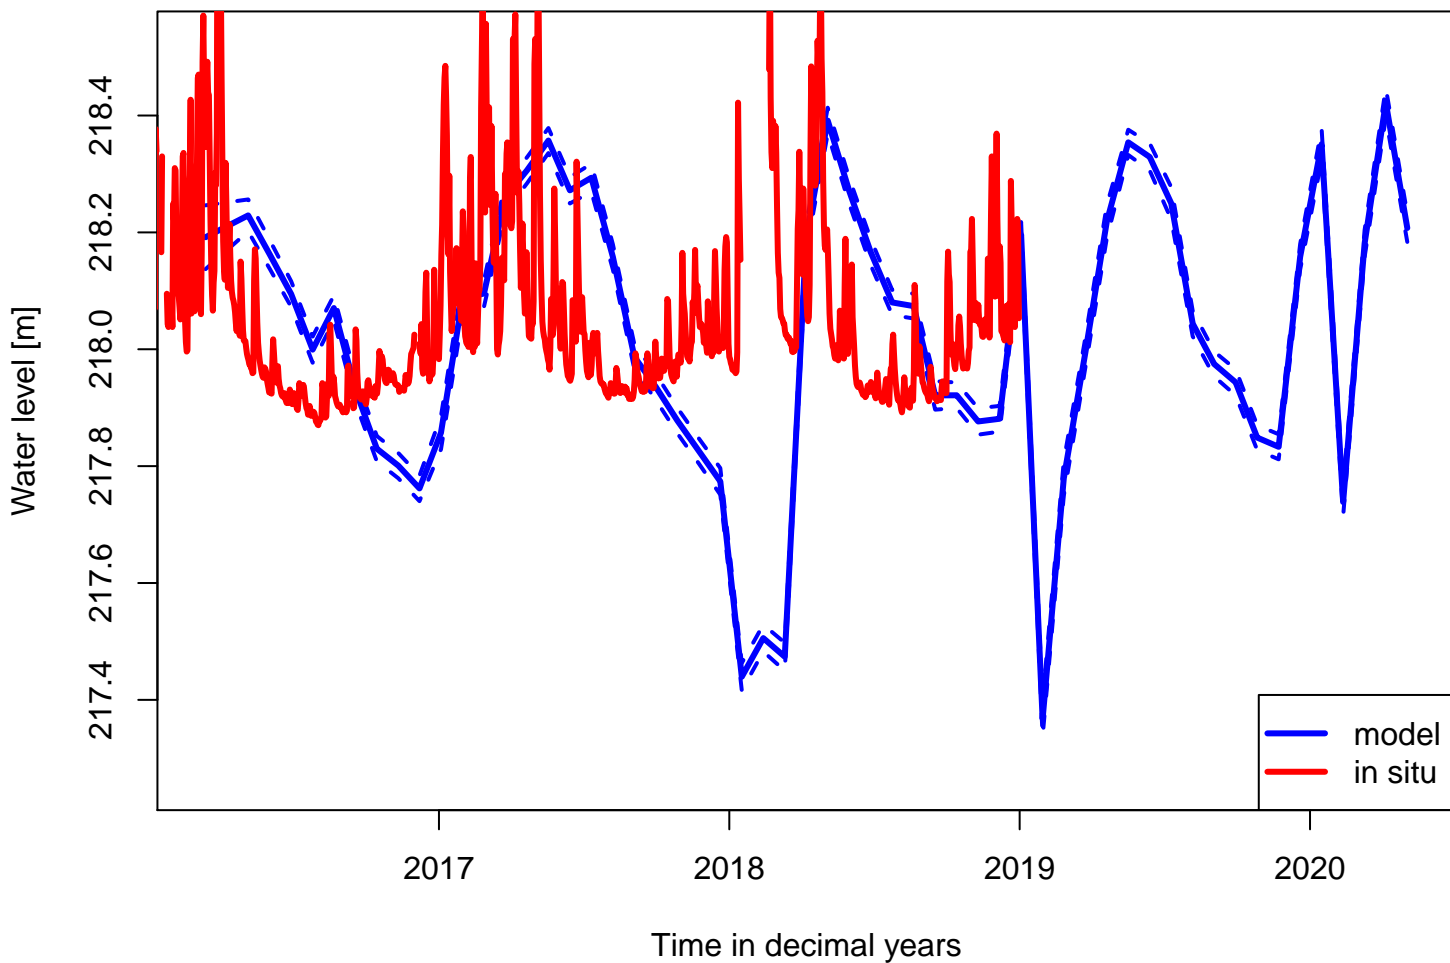

Supplement: s1 [file s1]

lakename: Contwoyto lakeid: 22 lat: 65.78 lon: -111.2

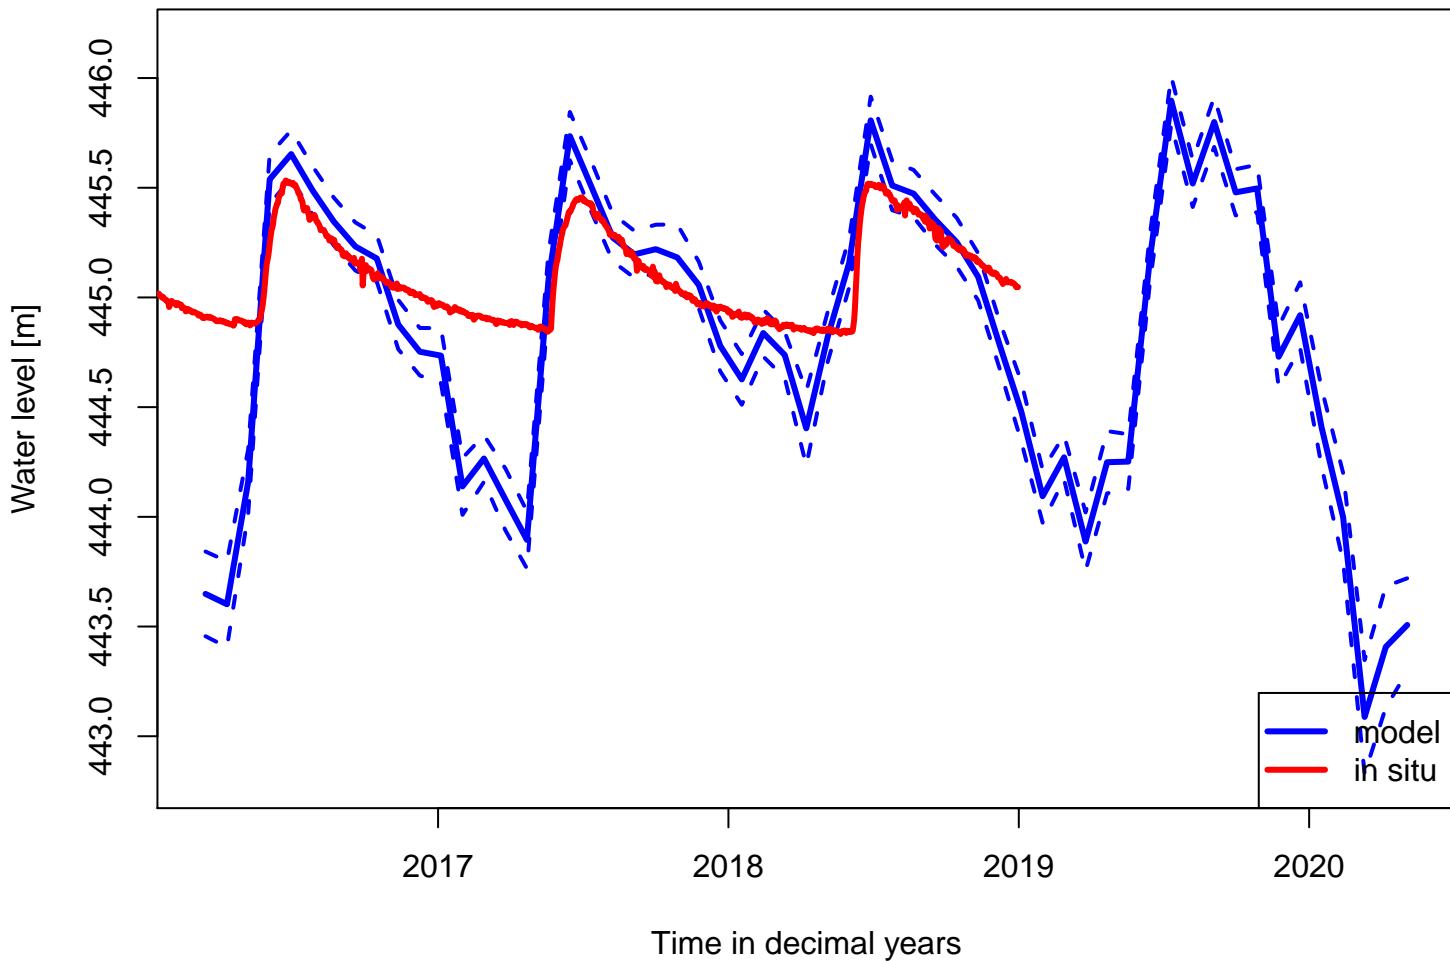

Supplement: s1 [file s1]

**lakename: Muskoka lakeid: 757 lat: 45.07 lon: -79.49**

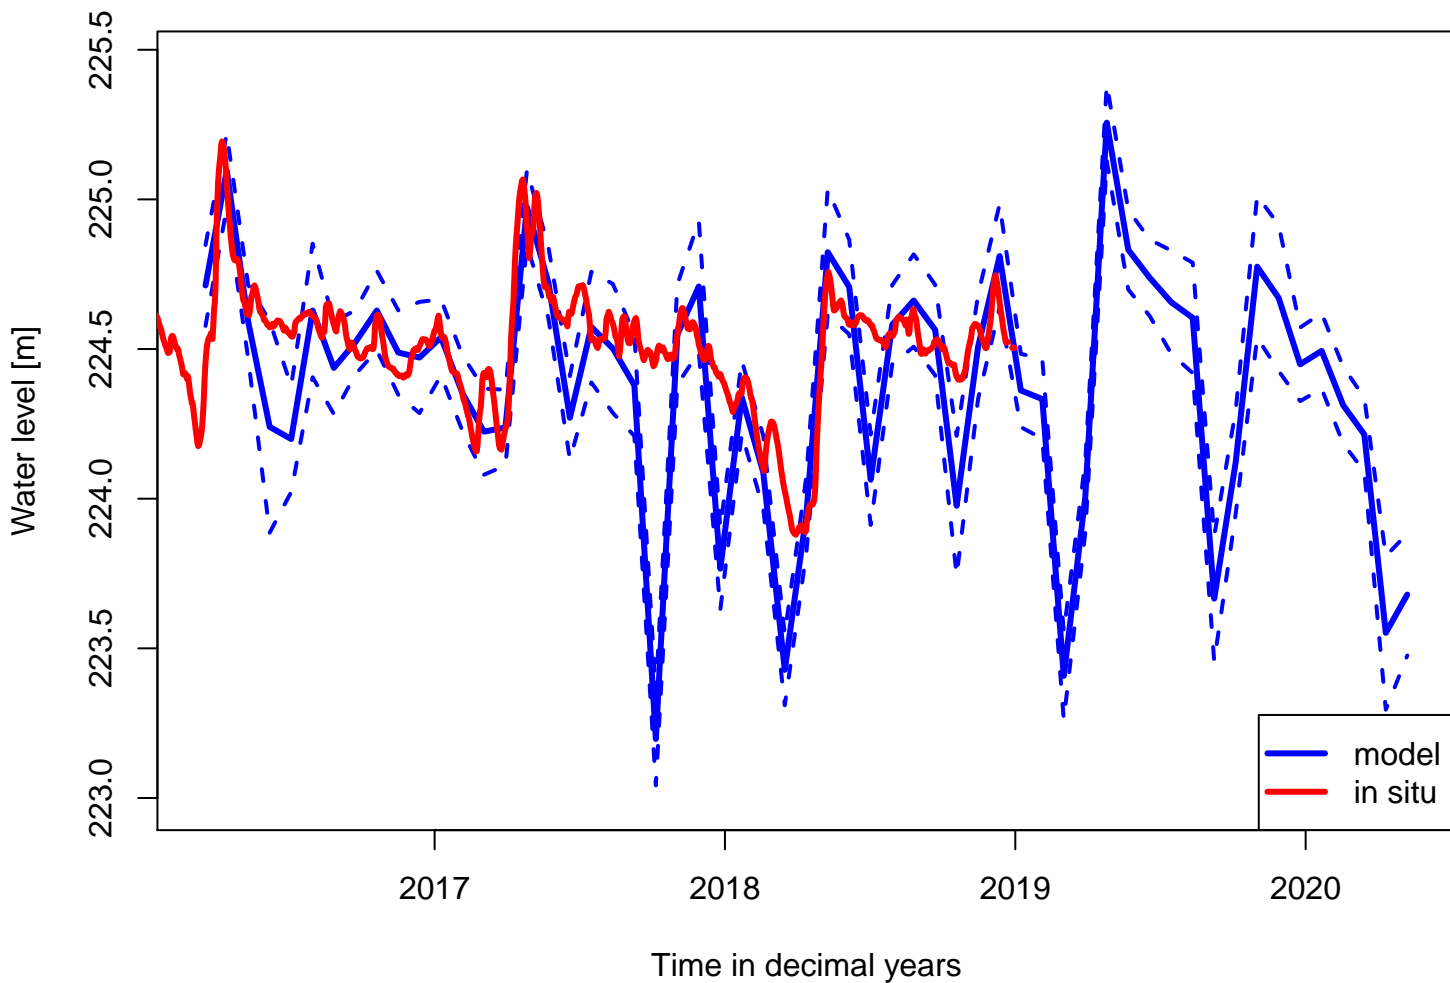

Supplement: s1 [file s1]

**lakename: Choke Canyon lakeid: 9605 lat: 28.48 lon: -98.25**

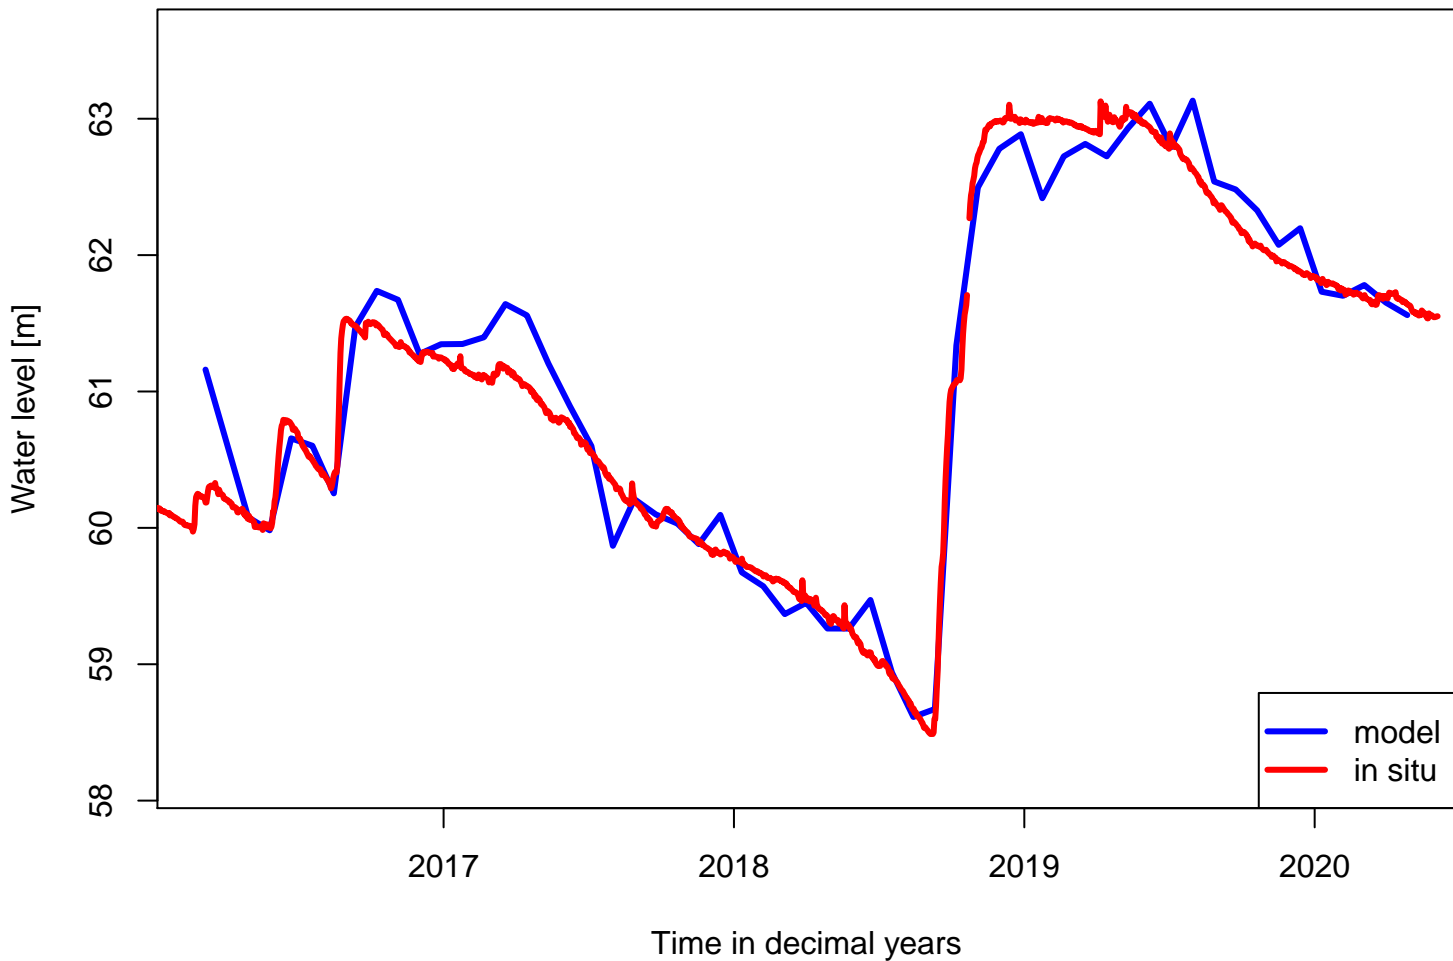

Supplement: s1 [file s1]

**lakename: Wabamun lakeid: 6821 lat: 53.56 lon: -114.5**

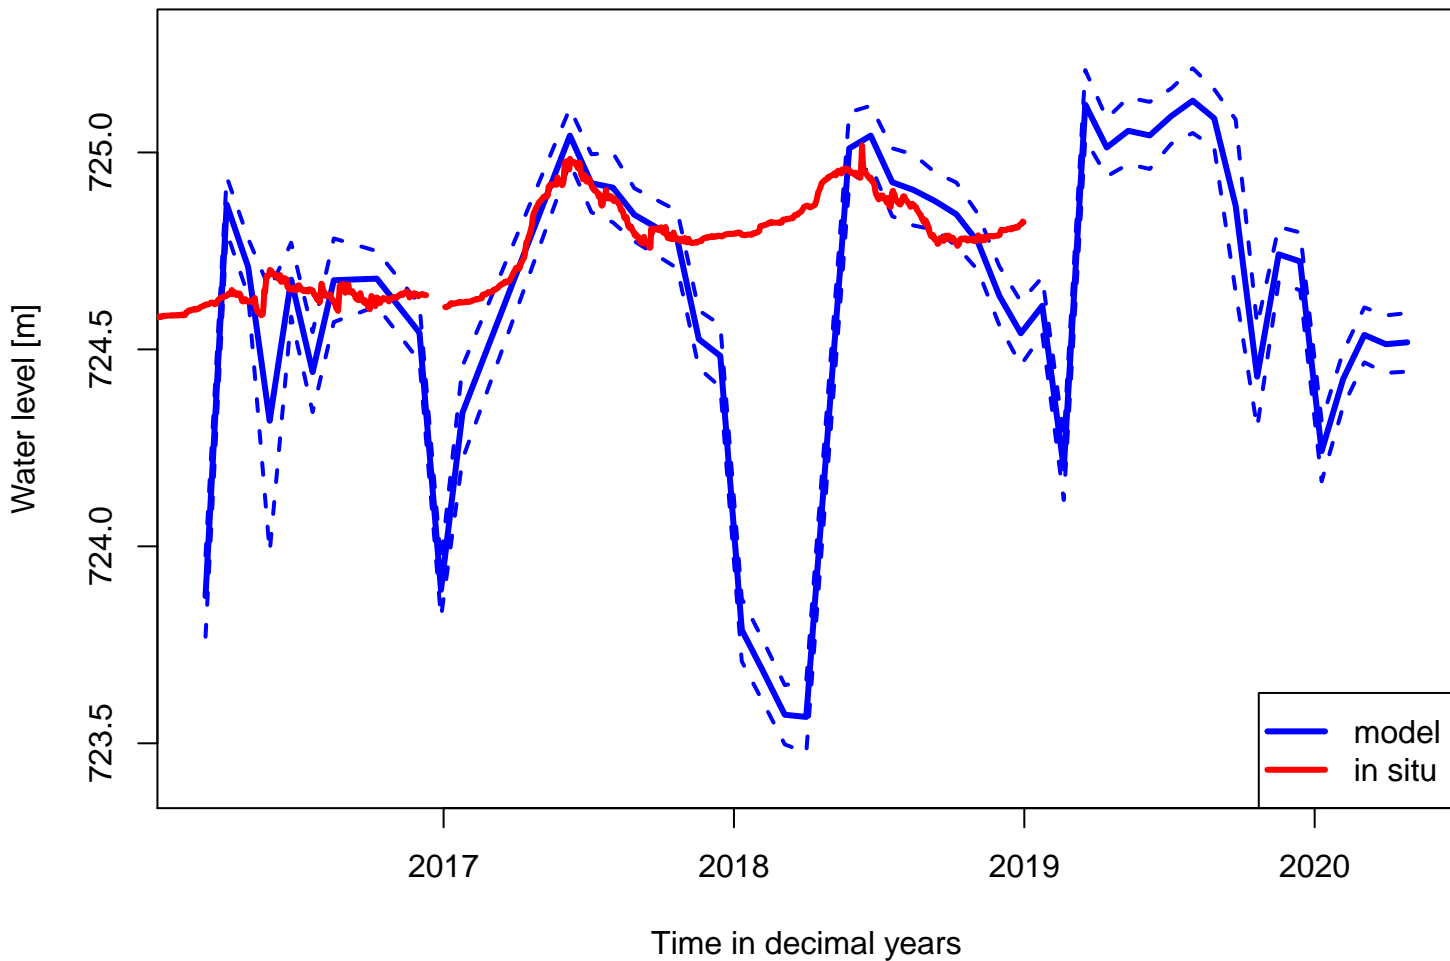

Supplement: s1 [file s1]

**lakename: Manitoba lakeid: 53 lat: 51.44 lon: -98.8**

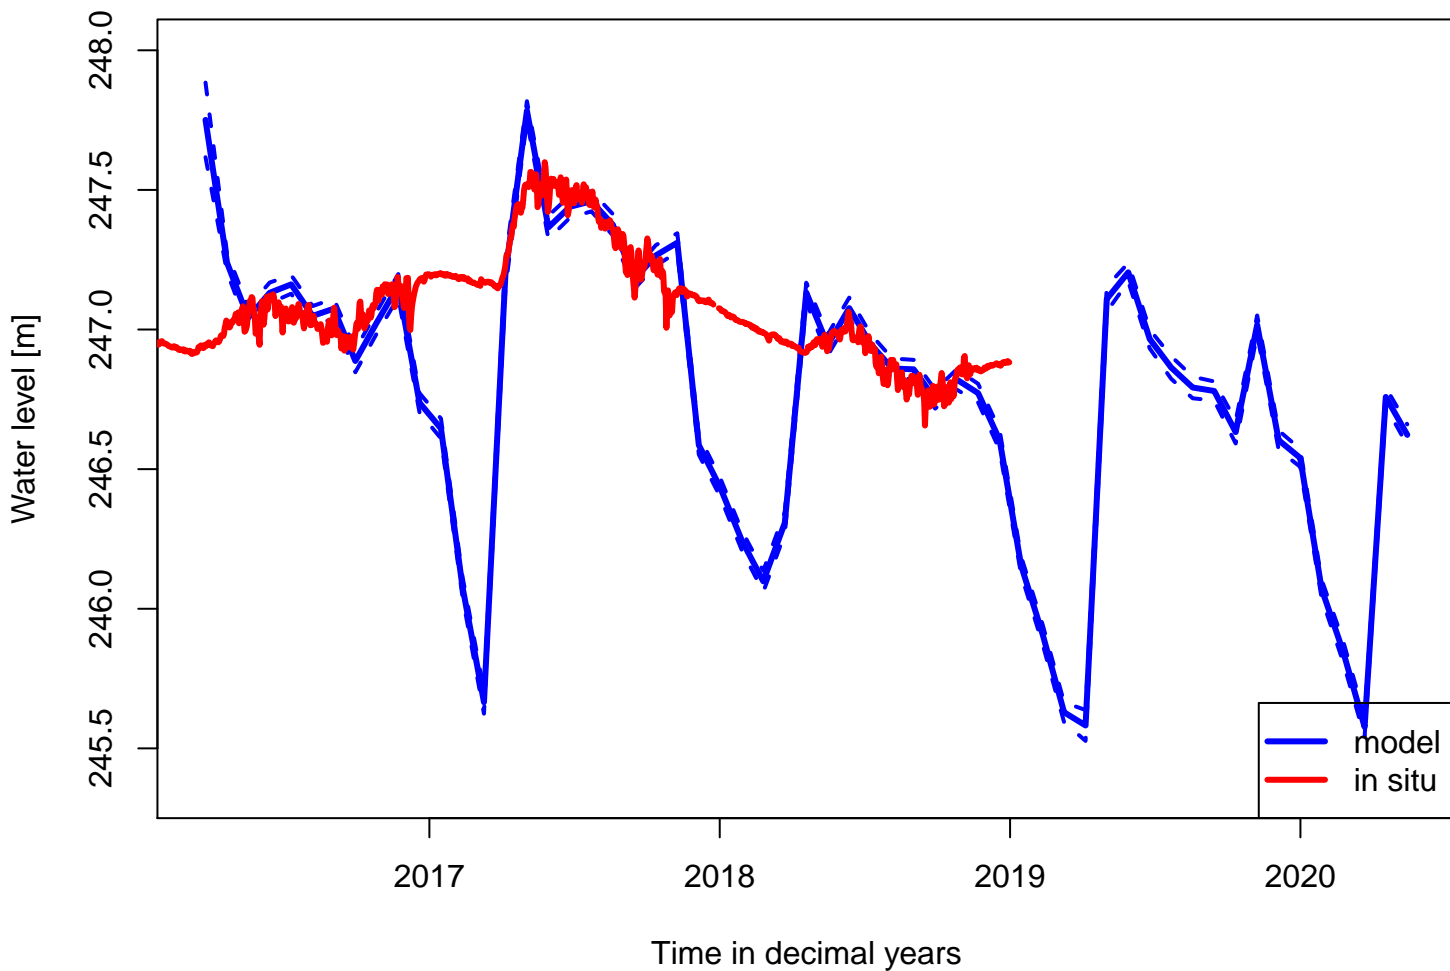

Supplement: s1 [file s1]

**lakename: Winnipegosis lakeid: 52 lat: 52.97 lon: -101**

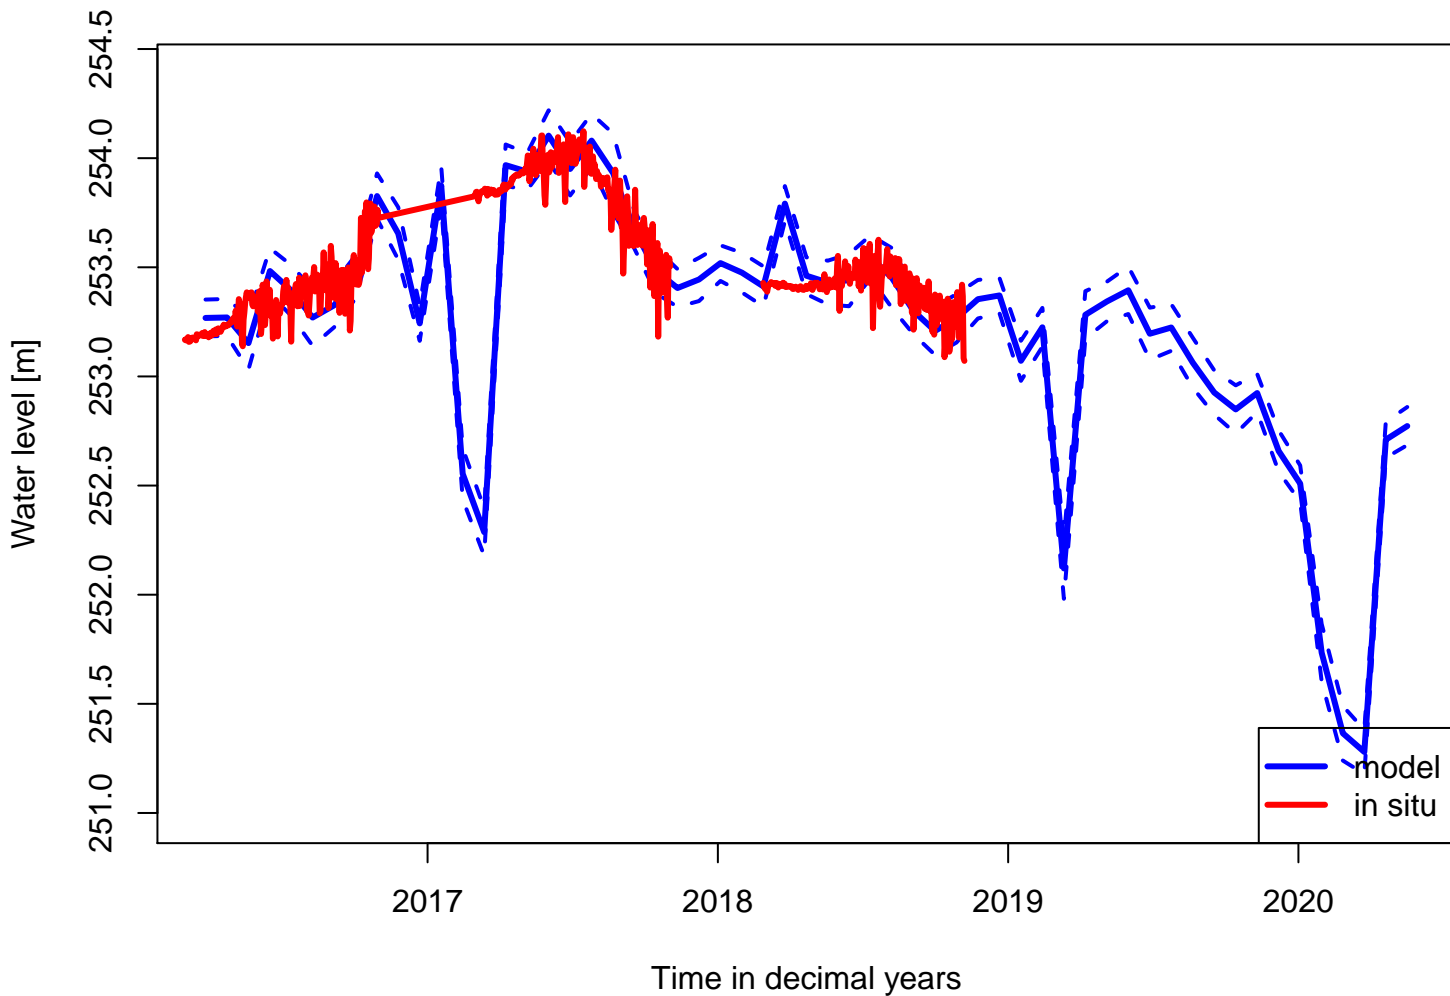

Supplement: s1 [file s1]

**lakename: lakeid: 306 lat: 63.65 lon: -95.85**

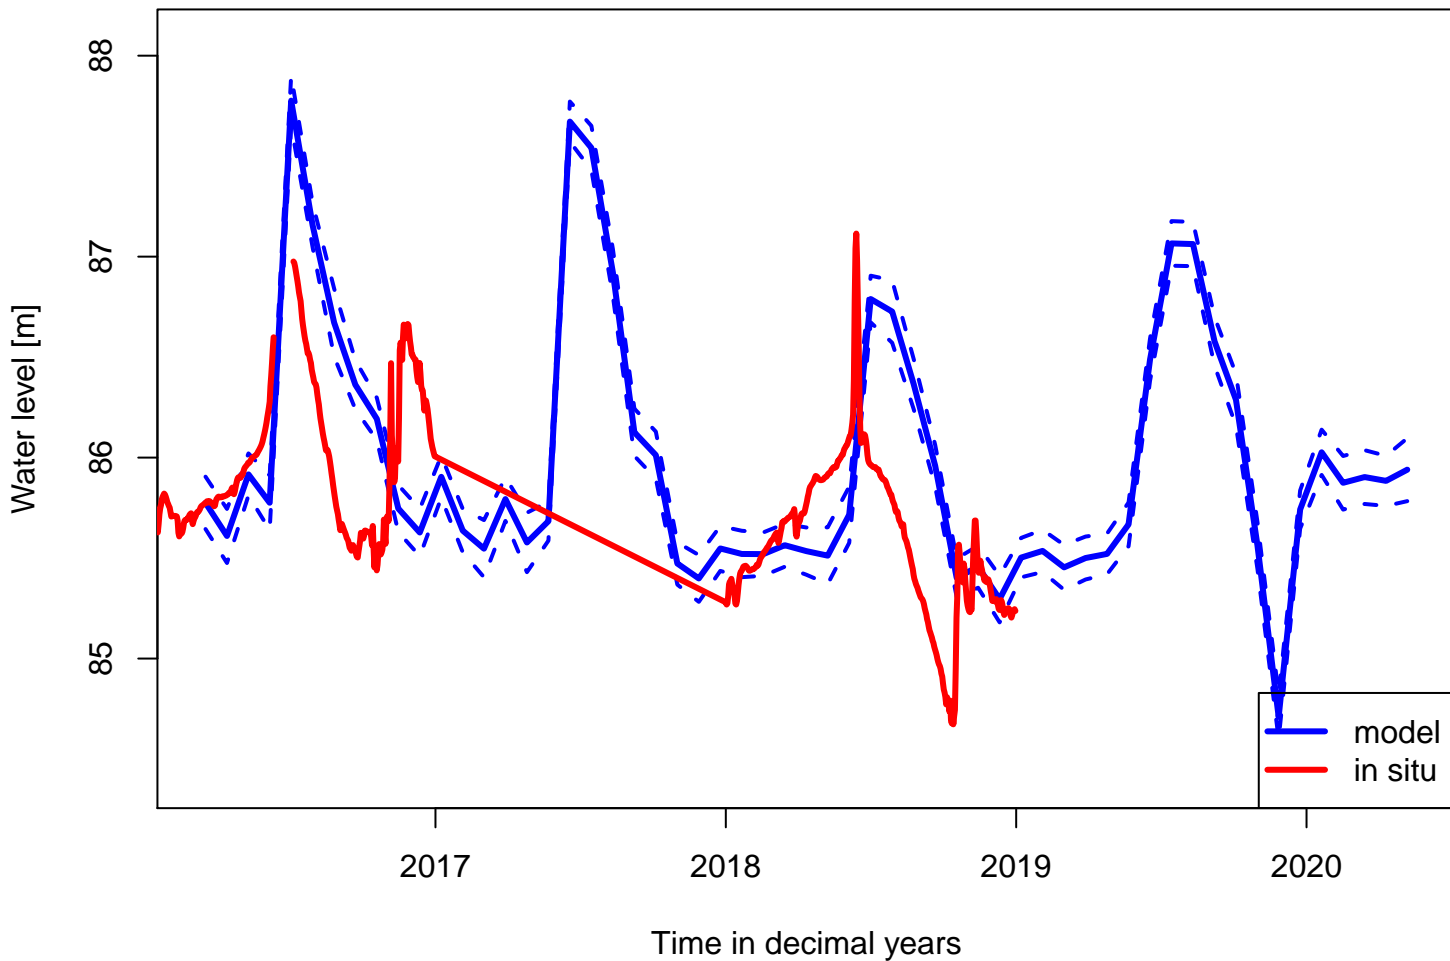

Supplement: s1 [file s1]

**lakename: Nechako Reservoir lakeid: 591 lat: 53.65 lon: -127.5**

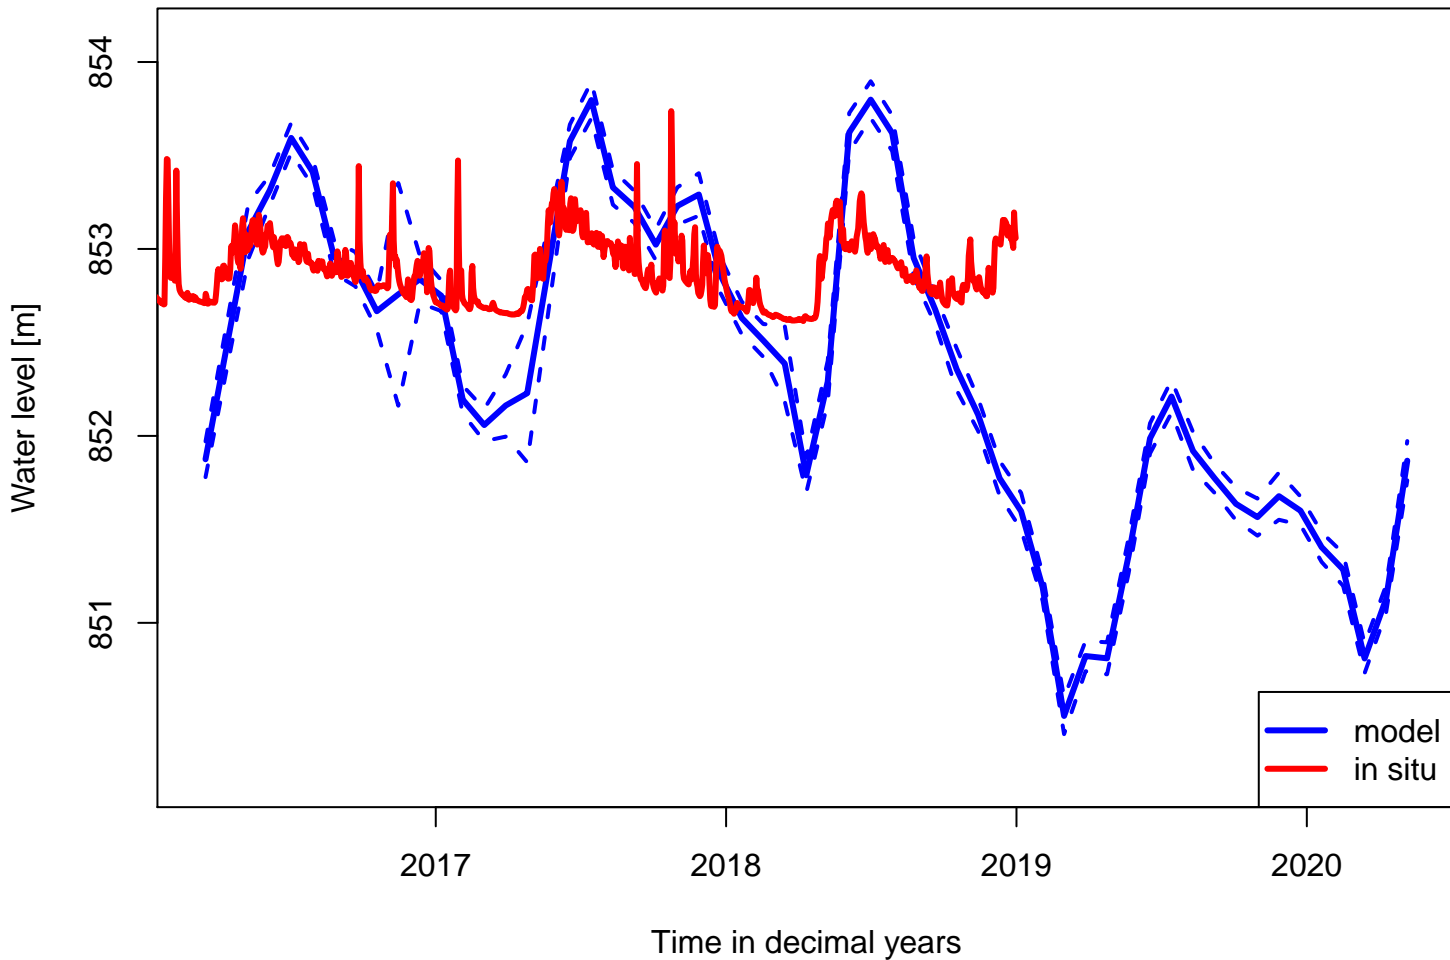

Supplement: s1 [file s1]

**lakename: lakeid: 6579 lat: 54.12 lon: -127.4**

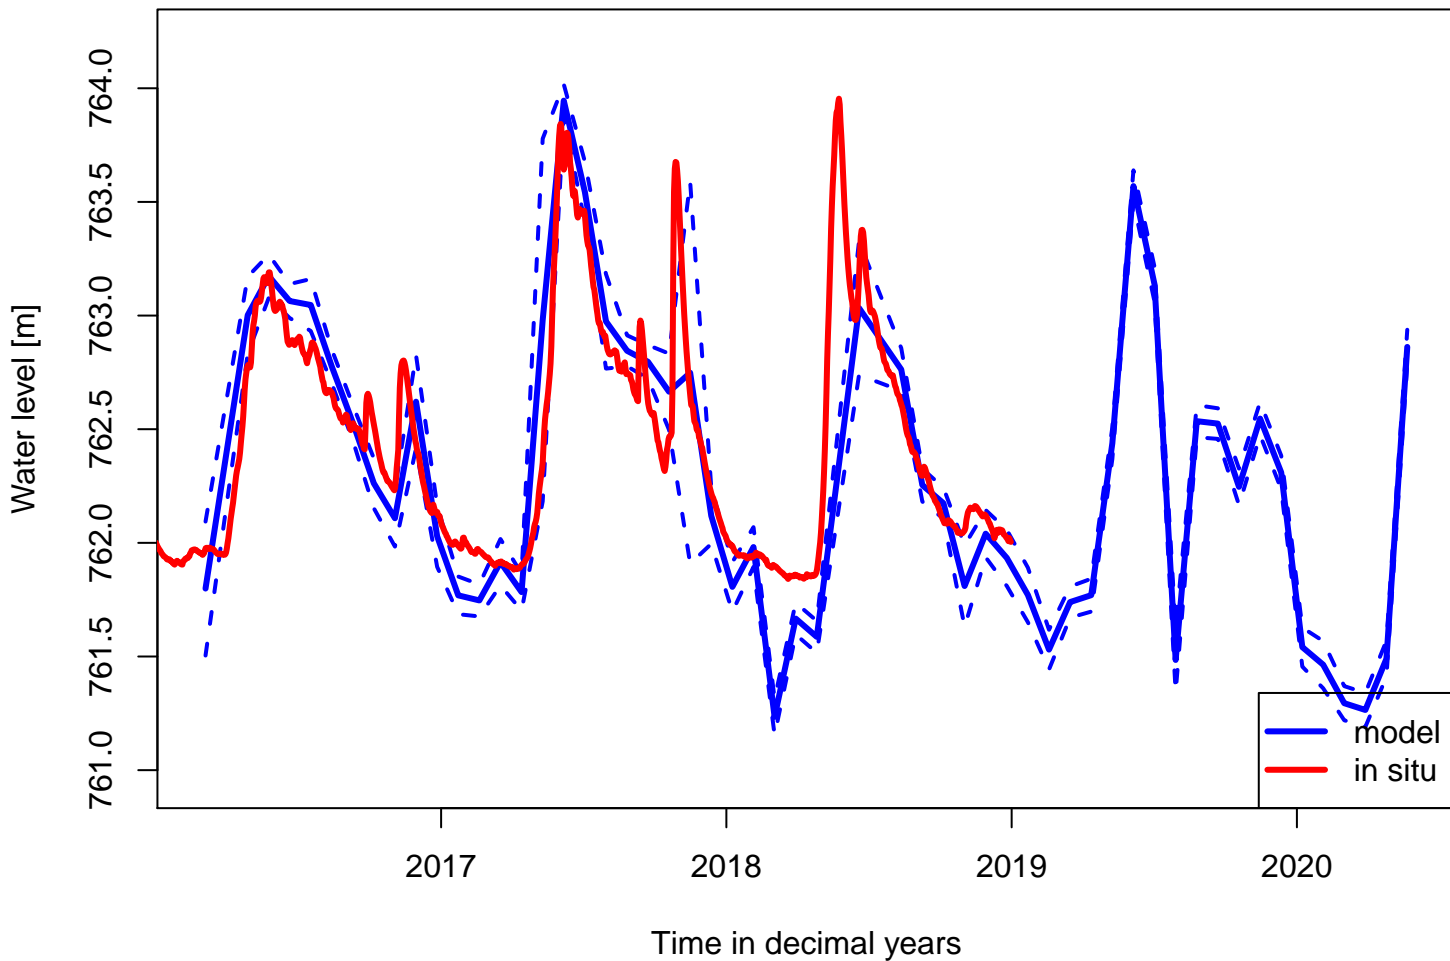

Supplement: s1 [file s1]

**lakename: Lesser Slave lakeid: 42 lat: 55.31 lon: -114.8**

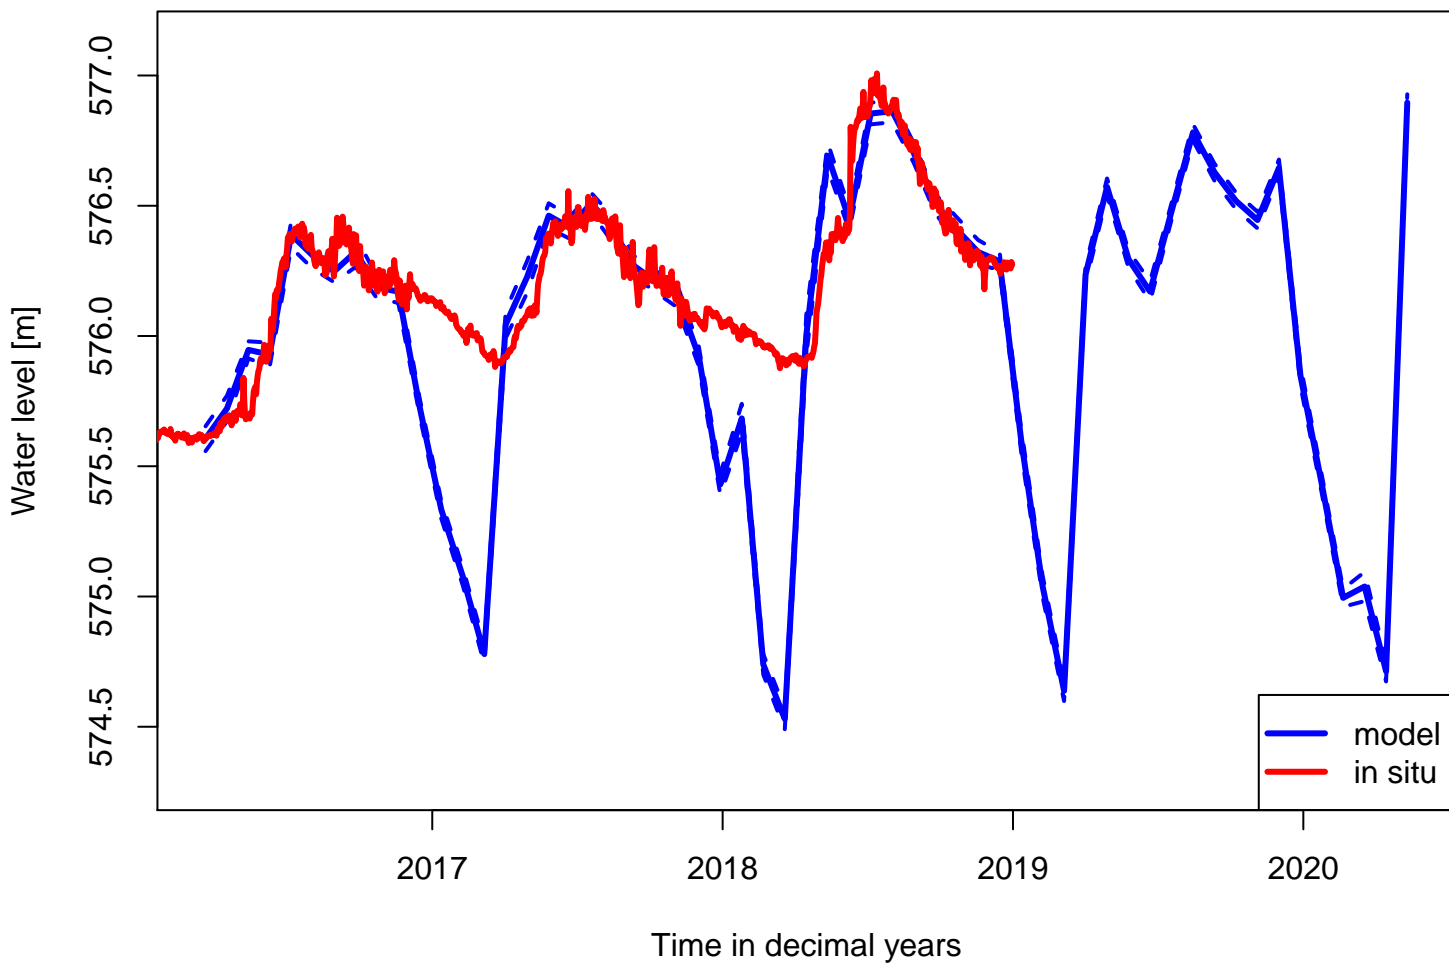

Supplement: s1 [file s1]

**lakename: Egg lakeid: 527 lat: 55.09 lon: -105.4**

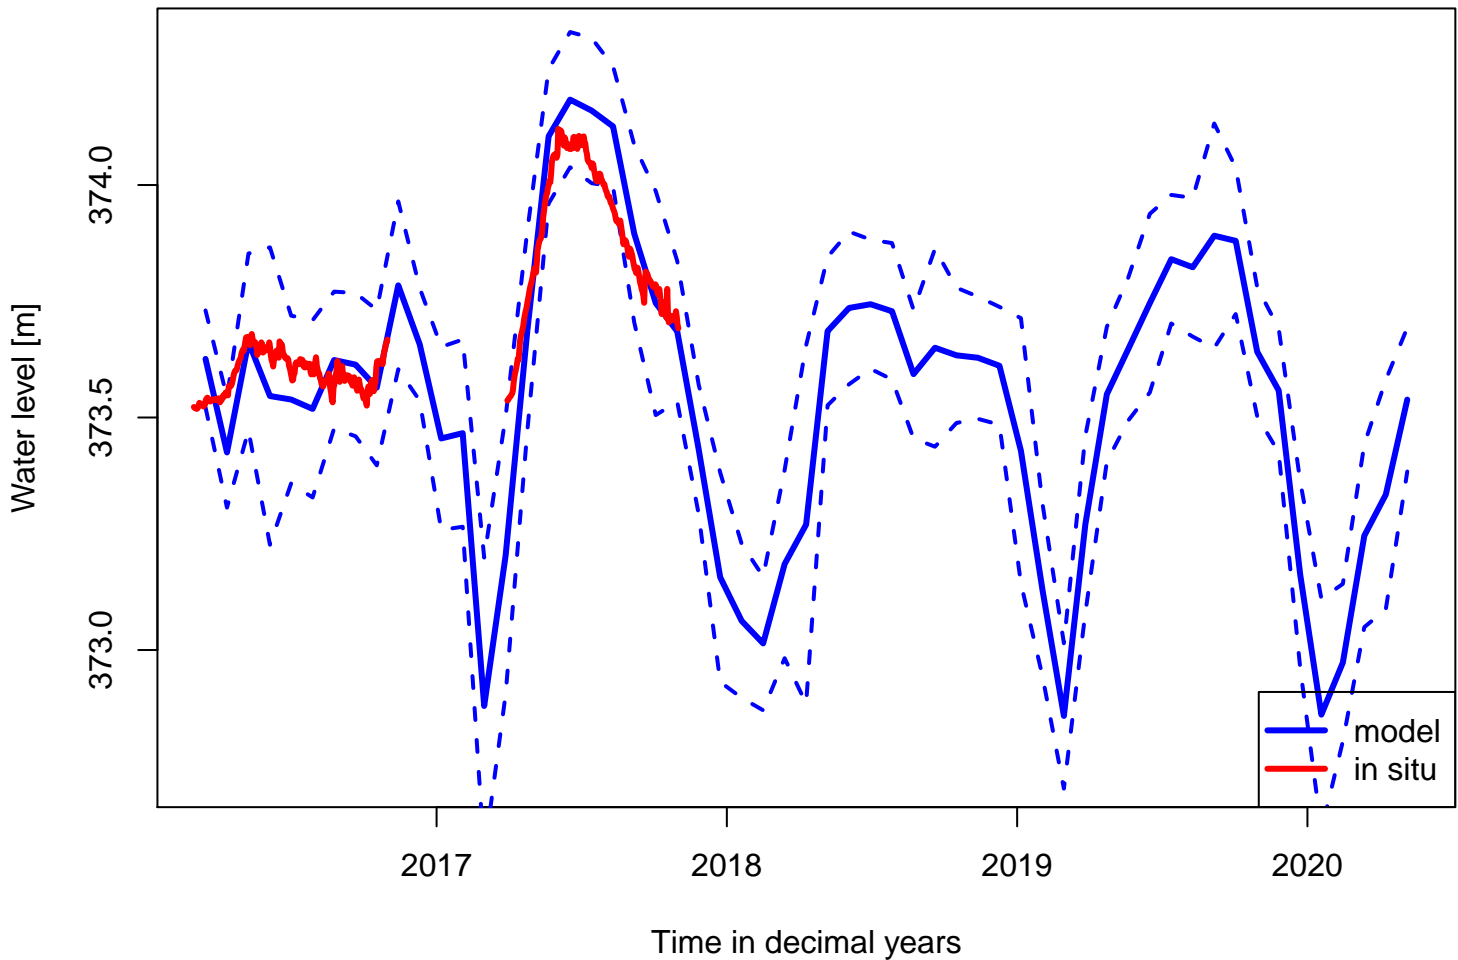

Supplement: s1 [file s1]

**lakename: St. Martin lakeid: 635 lat: 51.51 lon: -98.53**

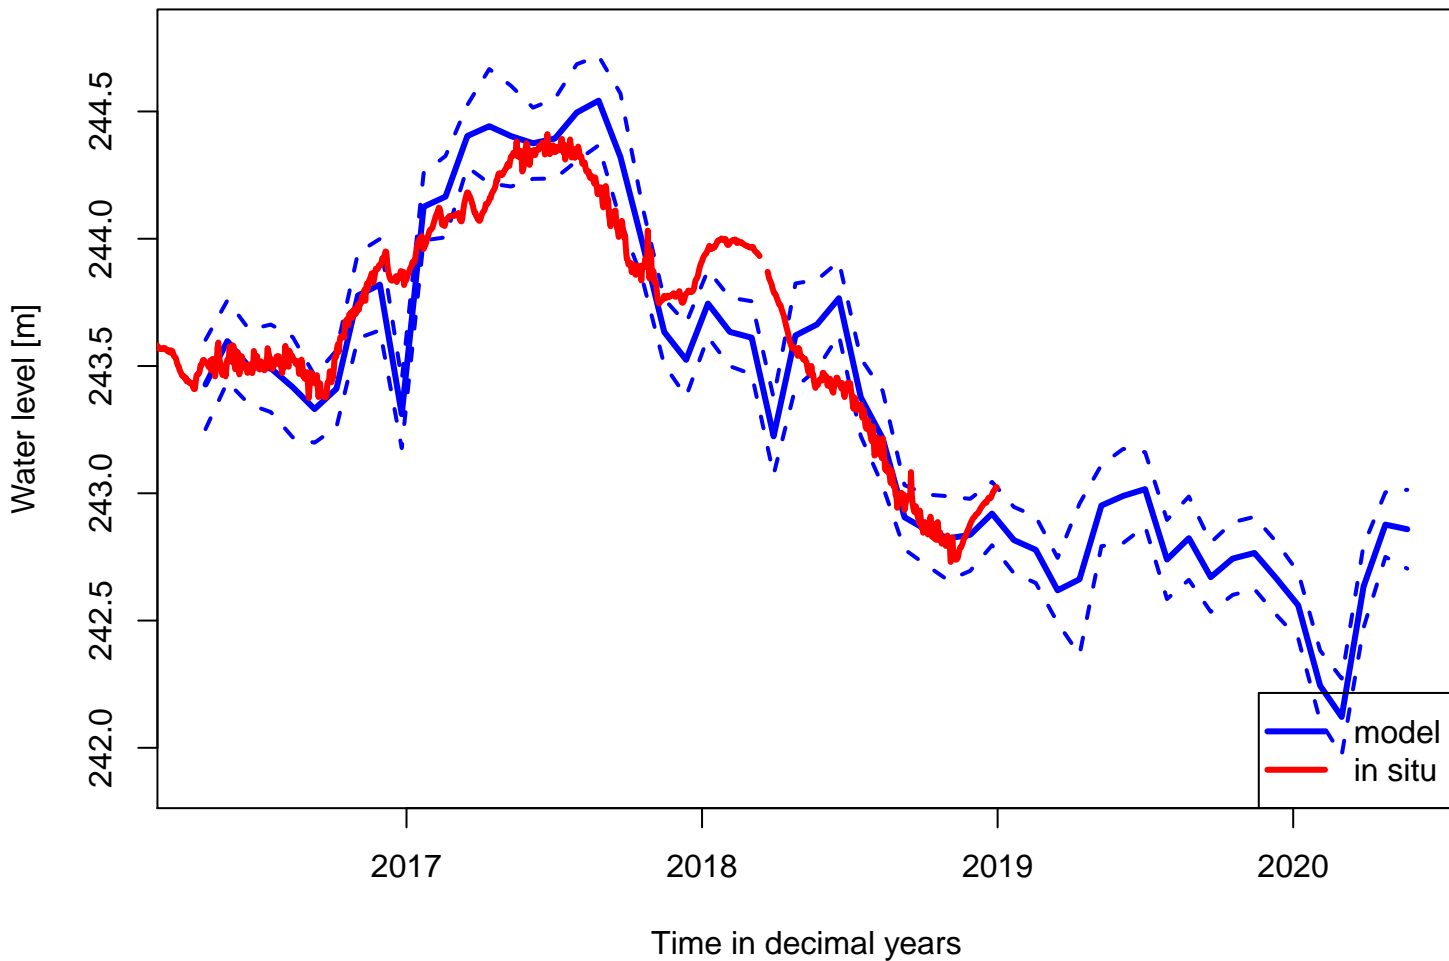

Supplement: s1 [file s1]

**lakename: Notigi Reservoir lakeid: 462 lat: 55.87 lon: -99.33**

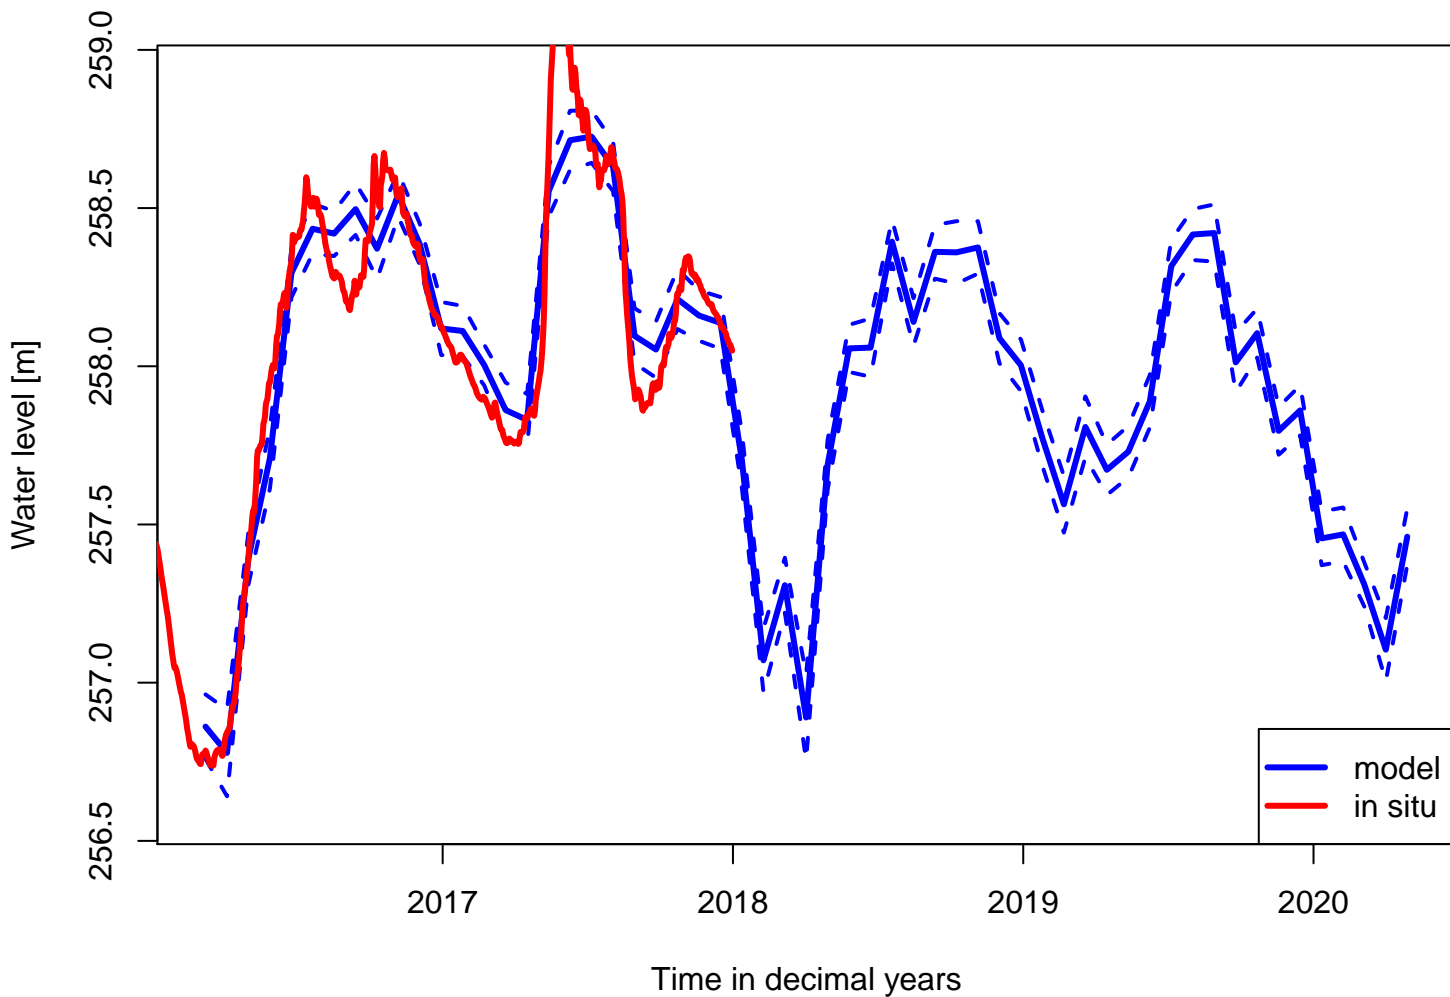

Supplement: s1 [file s1]

**lakename: Rainy lakeid: 710 lat: 48.7 lon: -92.96**

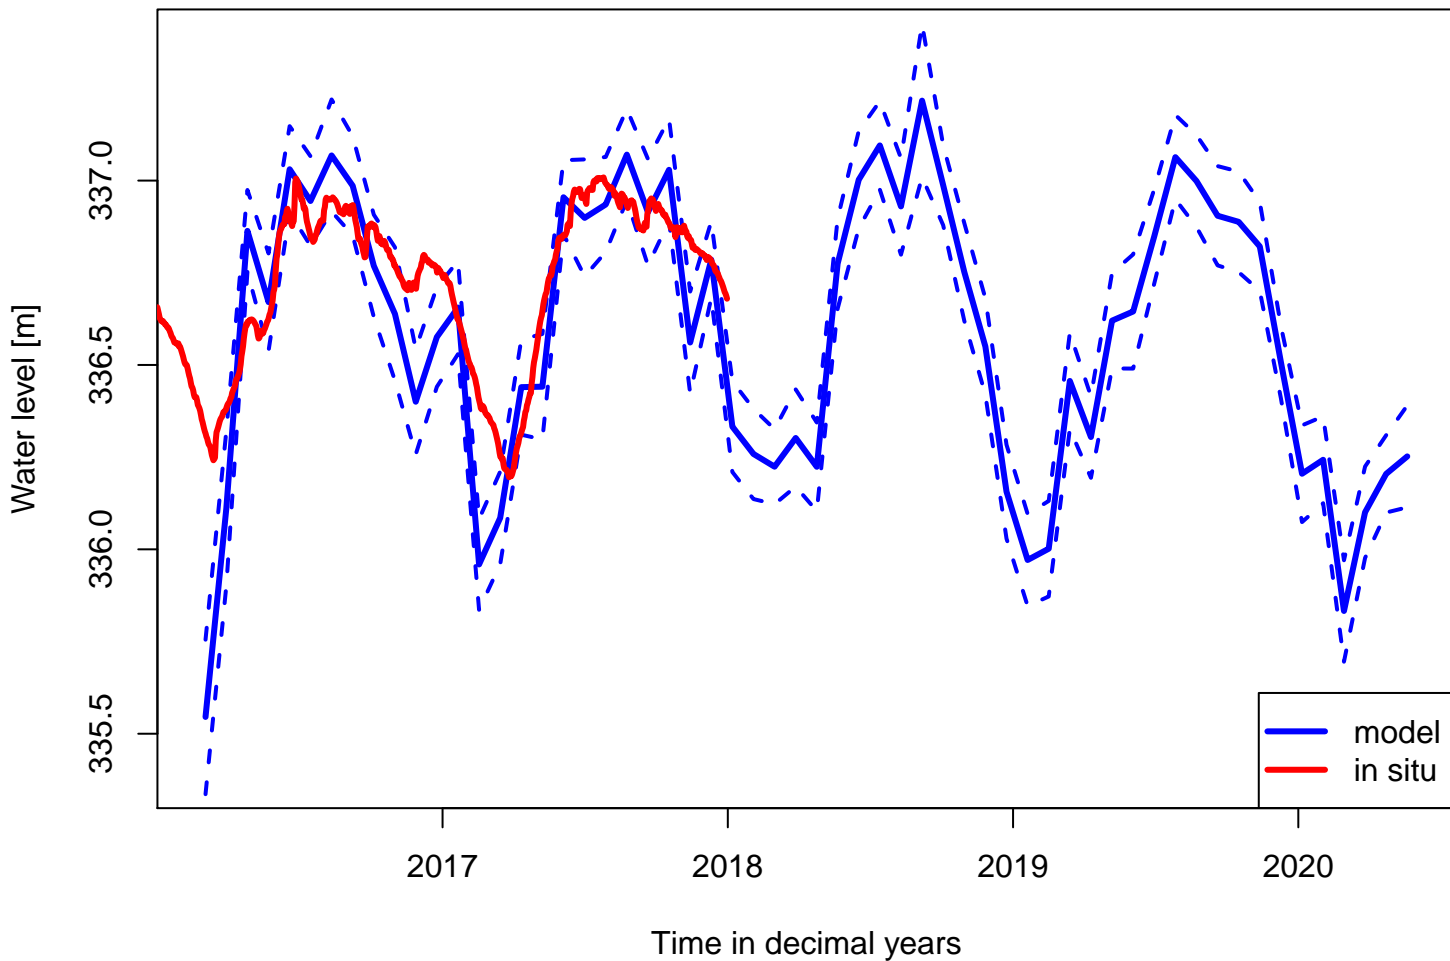

Supplement: s1 [file s1]

**lakename: Simcoe lakeid: 759 lat: 44.5 lon: -79.47**

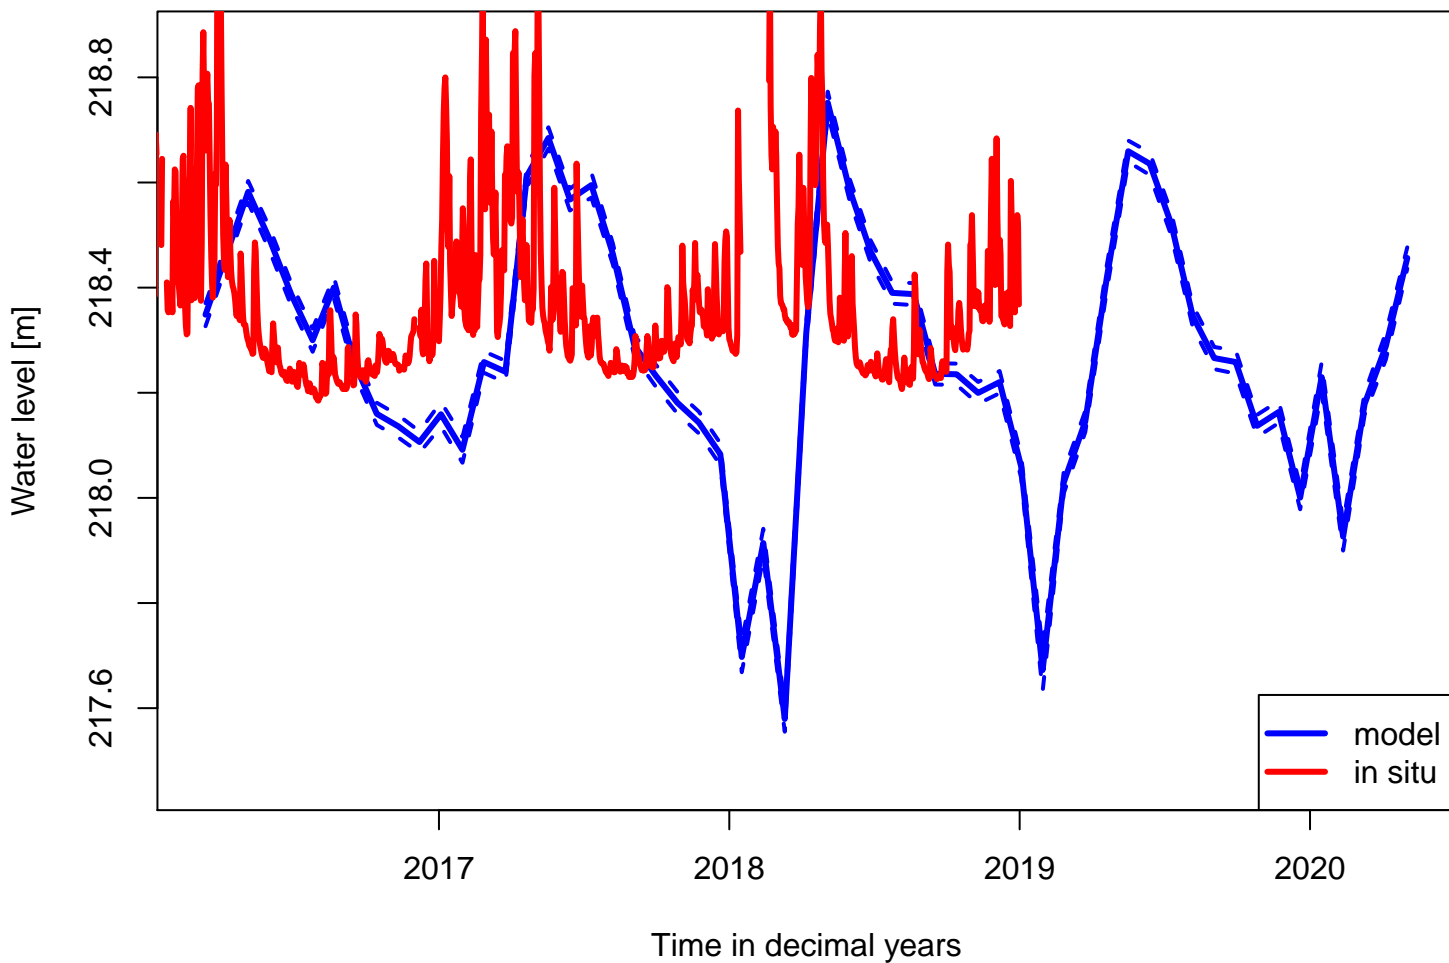

Supplement: s1 [file s1]

**lakename: Rainy lakeid: 710 lat: 48.7 lon: -92.96**

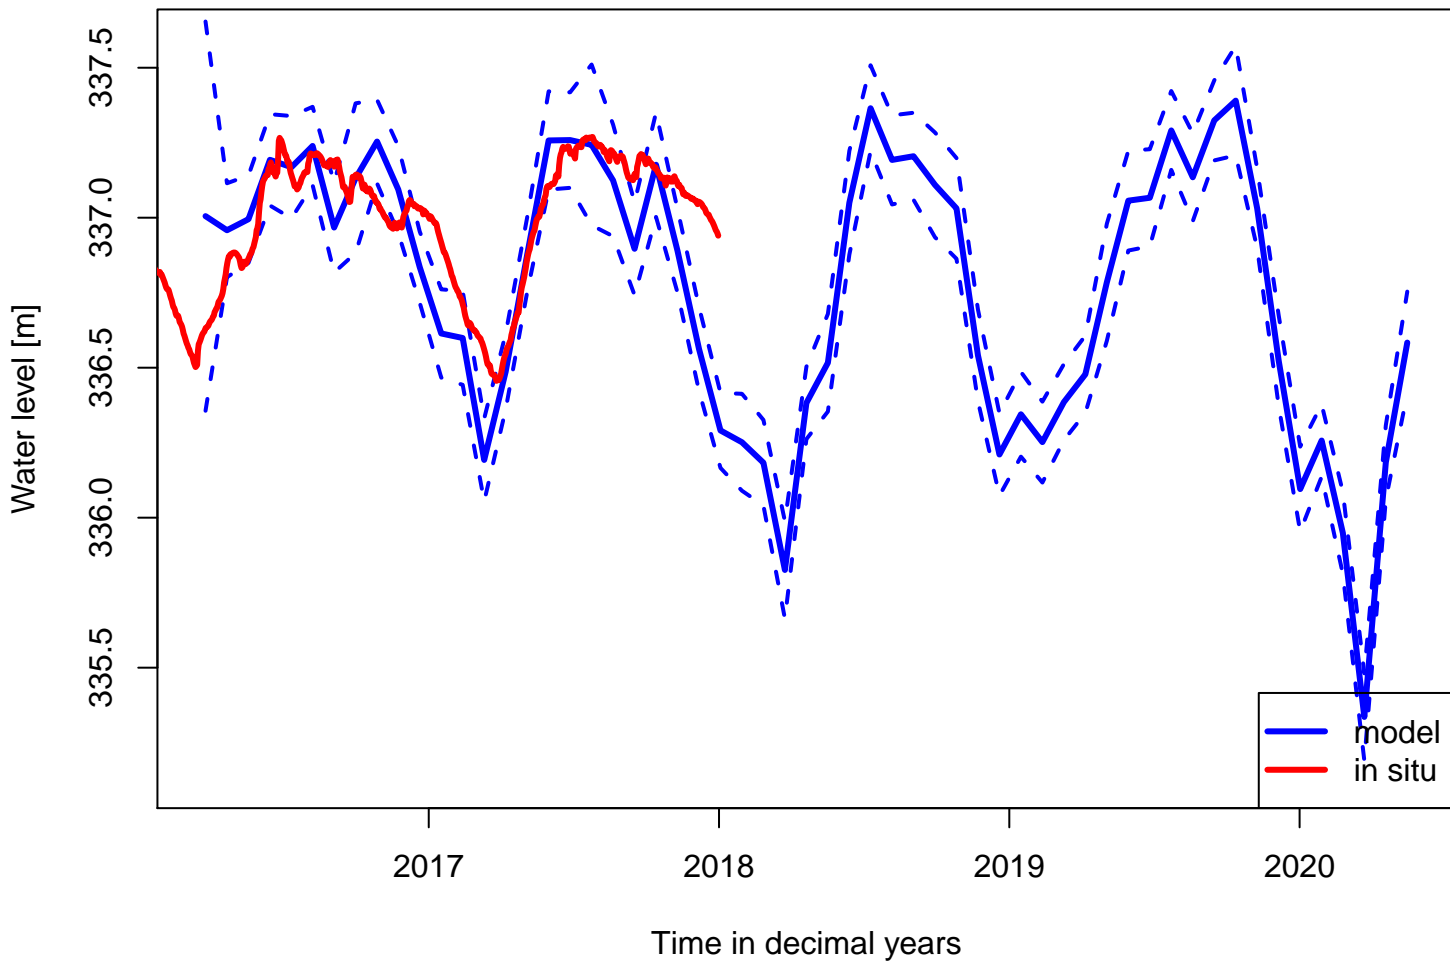

Supplement: s1 [file s1]

**lakename: lakeid: 7726 lat: 50.68 lon: -93.97**

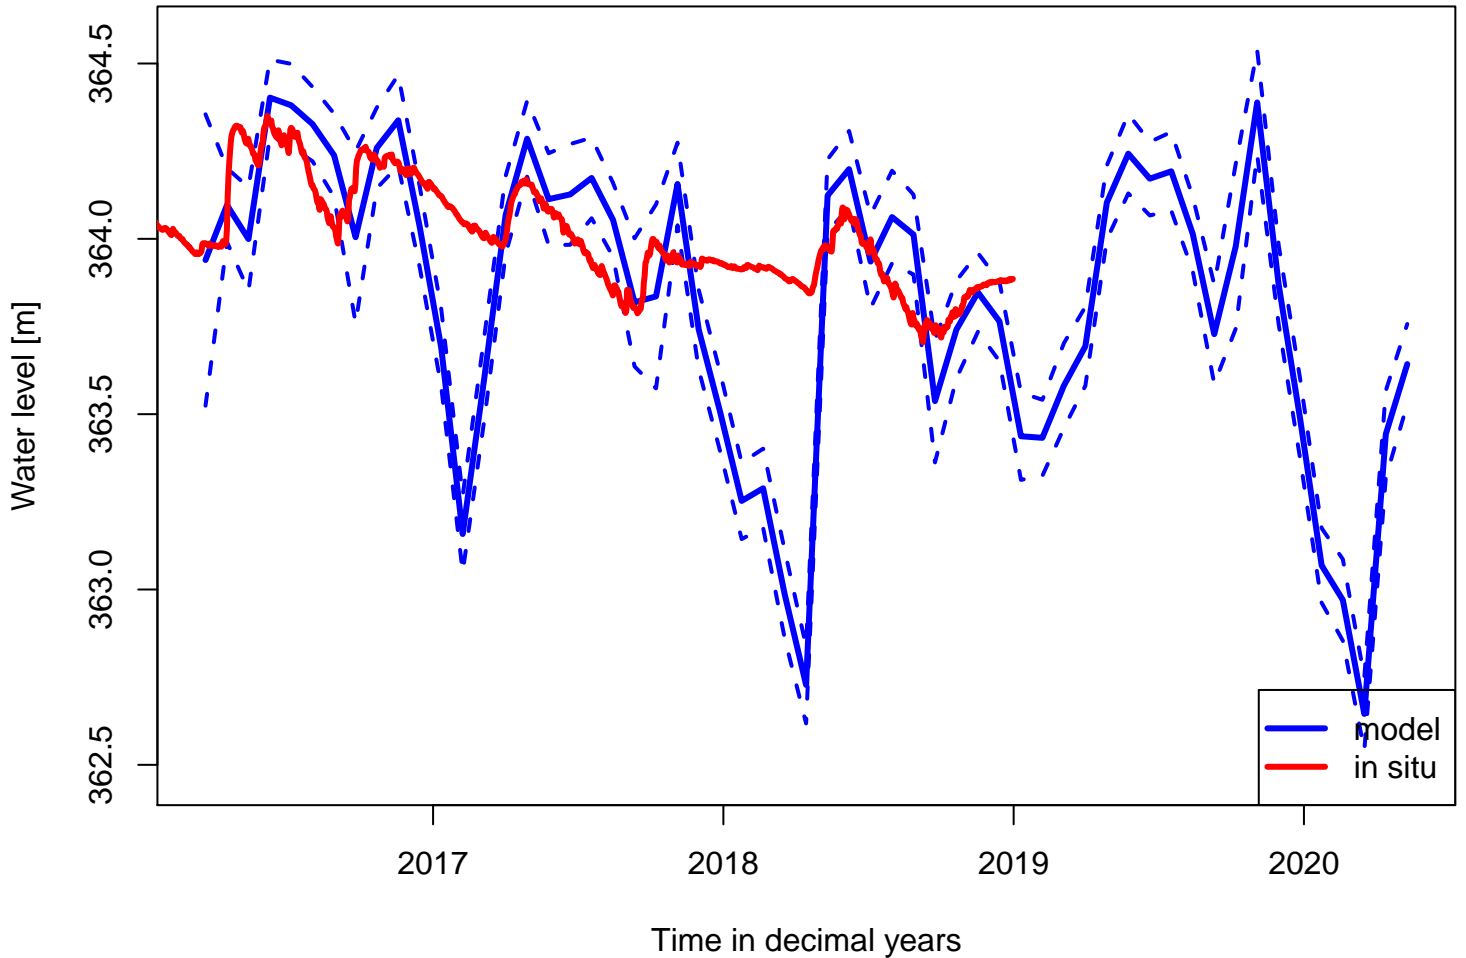

Supplement: s1 [file s1]

**lakename: Woods lakeid: 57 lat: 49.77 lon: -94.5**

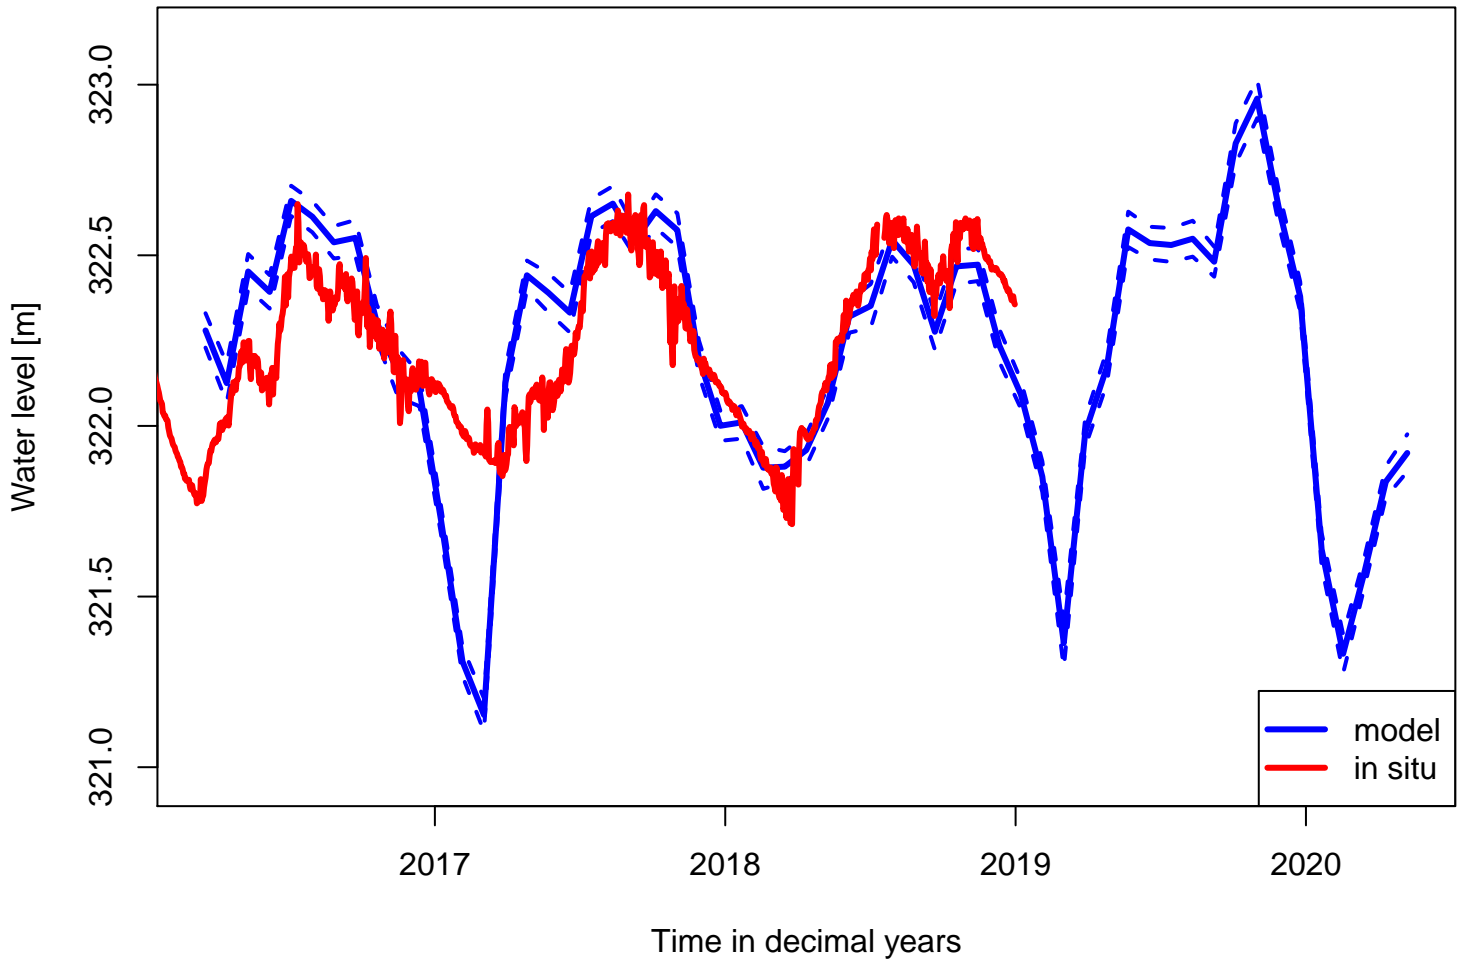

Supplement: s1 [file s1]

**lakename: Nechako Reservoir lakeid: 591 lat: 53.65 lon: -127.5**

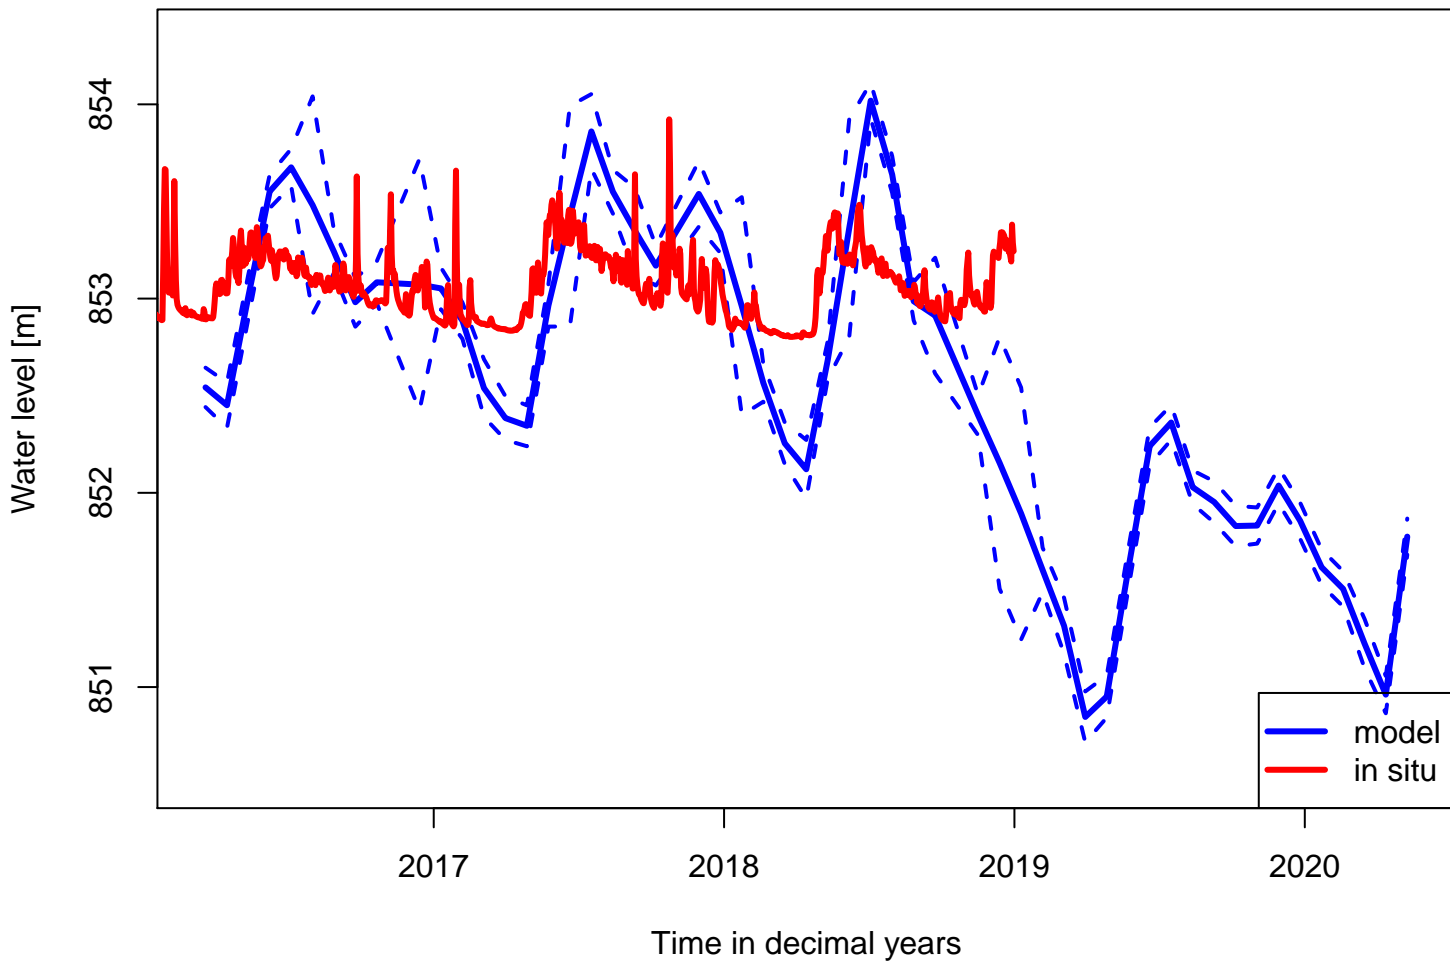

Supplement: s1 [file s1]

**lakename: Pontchartrain lakeid: 68 lat: 30.2 lon: -90.12**

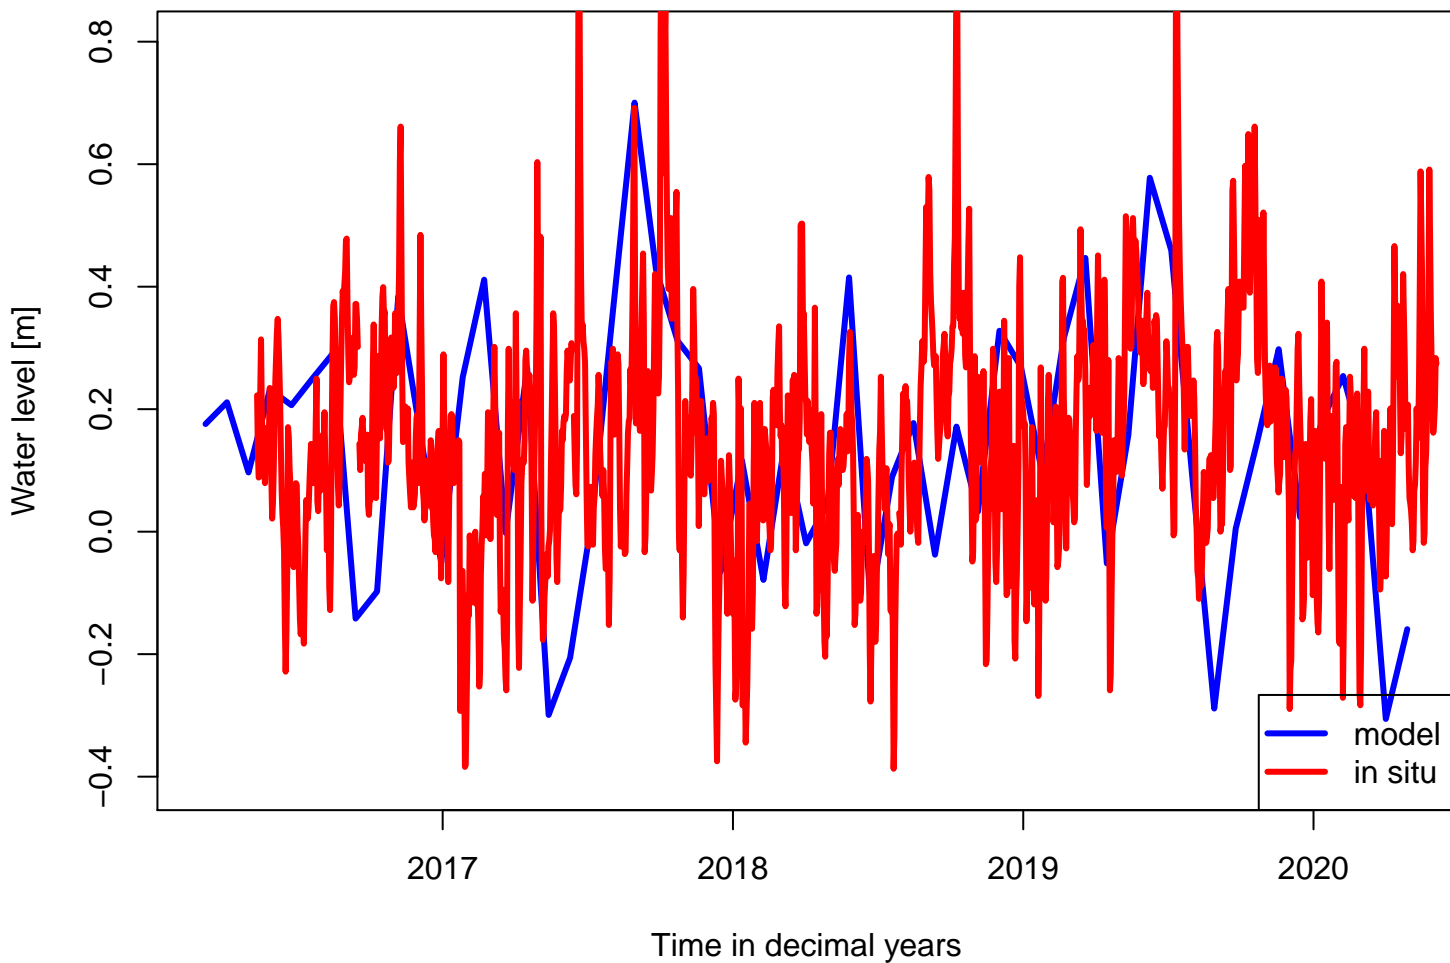

Supplement: s1 [file s1]

**lakename: Salton lakeid: 829 lat: 33.19 lon: -115.8**

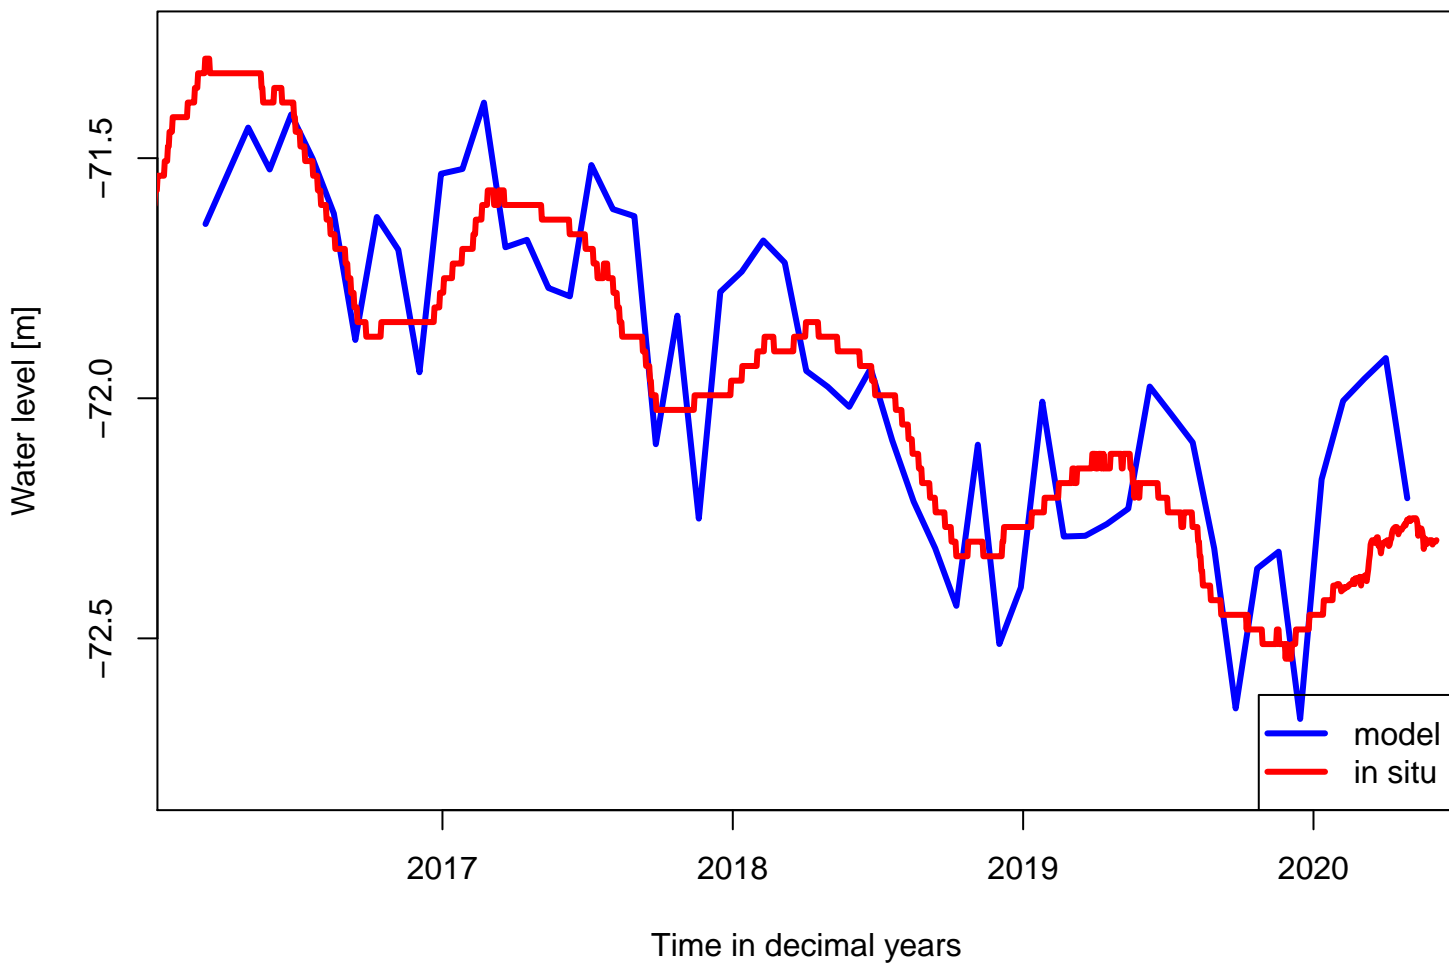

Supplement: s1 [file s1]

**lakename: Lake Chelan lakeid: 727 lat: 48.31 lon: -120.7**

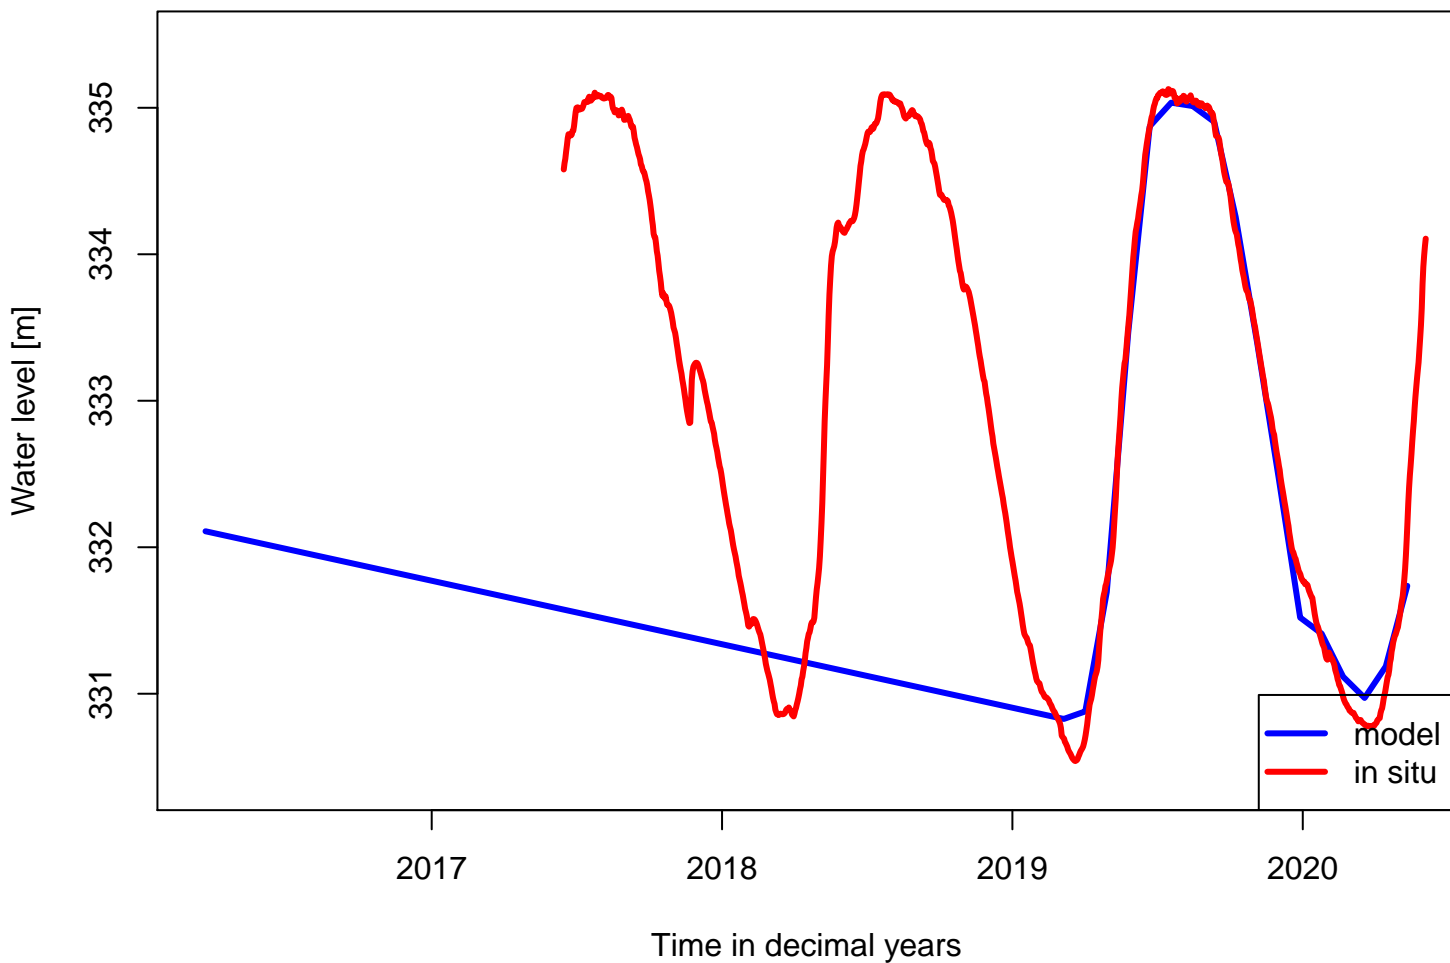

Supplement: s1 [file s1]

**lakename: Nechako Reservoir lakeid: 591 lat: 53.65 lon: -127.5**

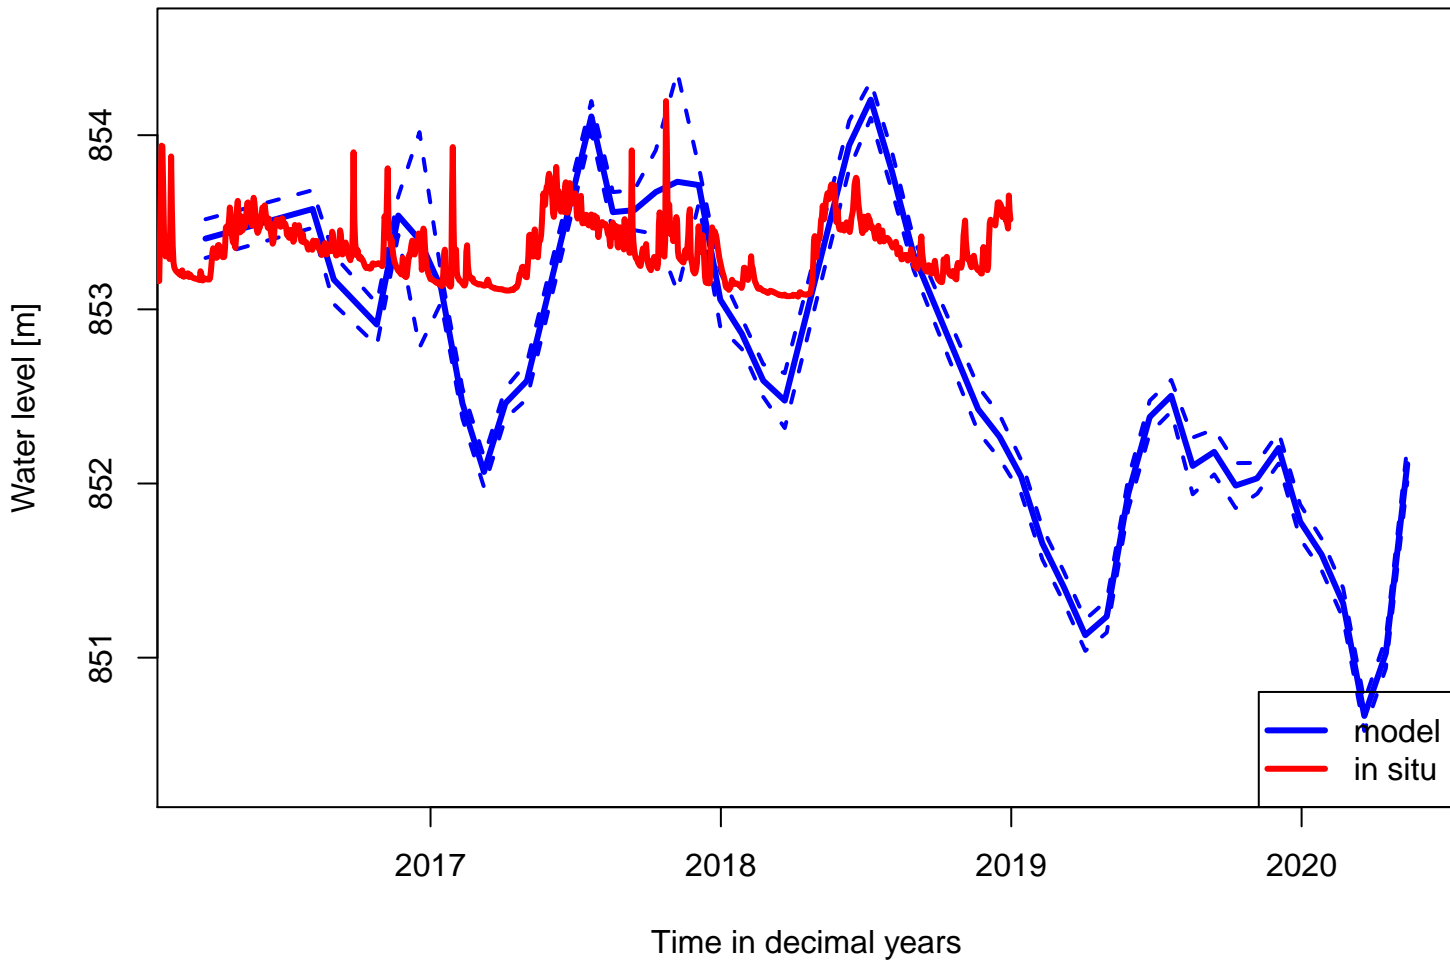

Supplement: s1 [file s1]

**lakename: St. Francis lakeid: 754 lat: 45.06 lon: -74.55**

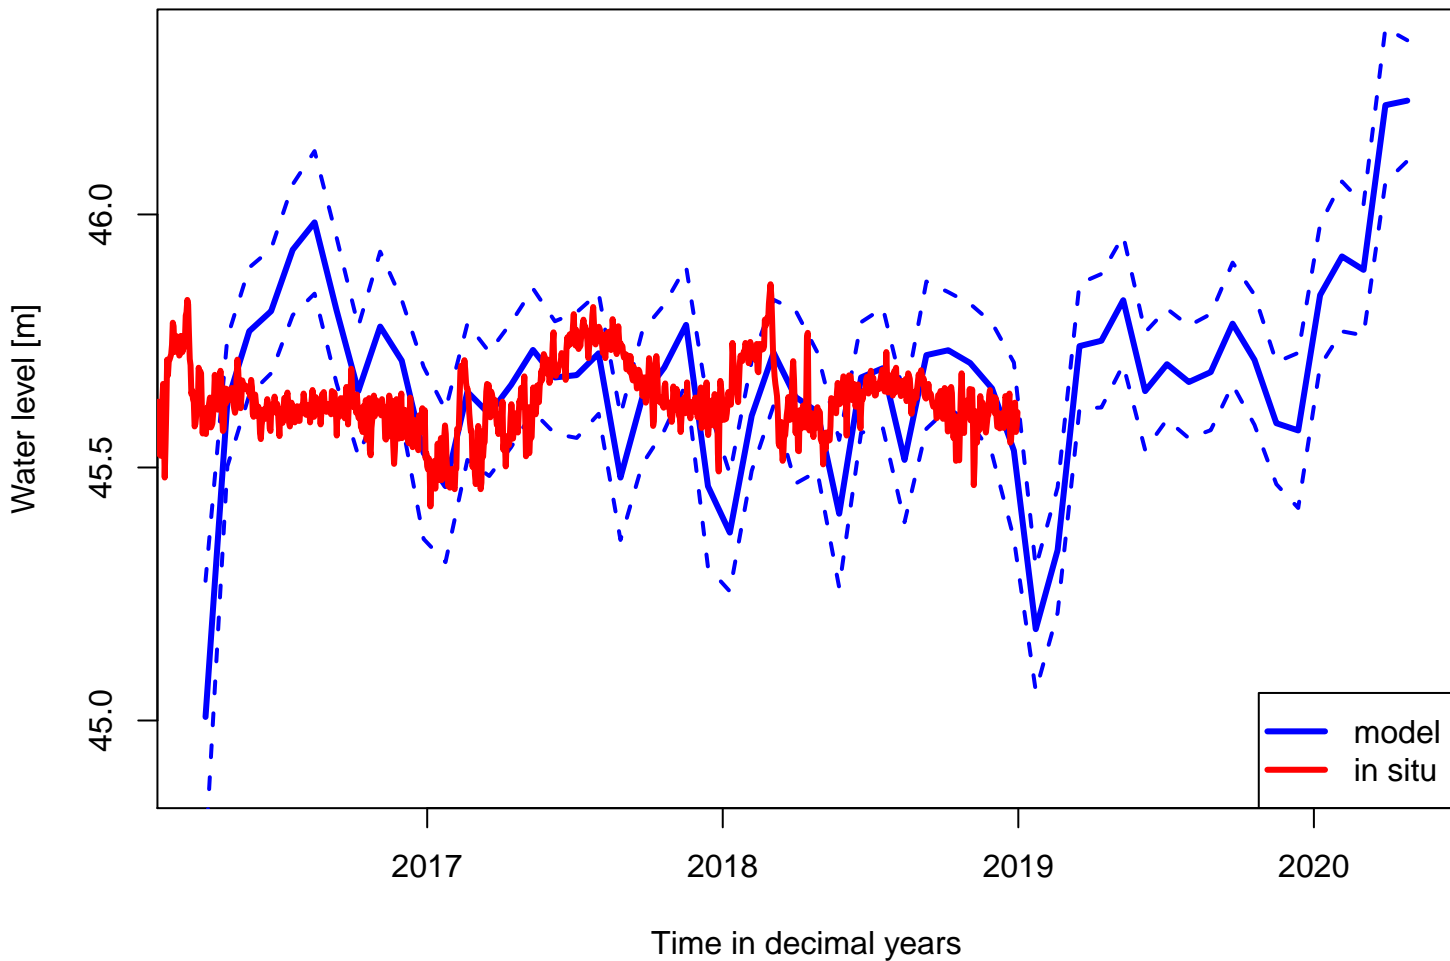

Supplement: s1 [file s1]

**lakename: Black lakeid: 425 lat: 59.15 lon: -105.5**

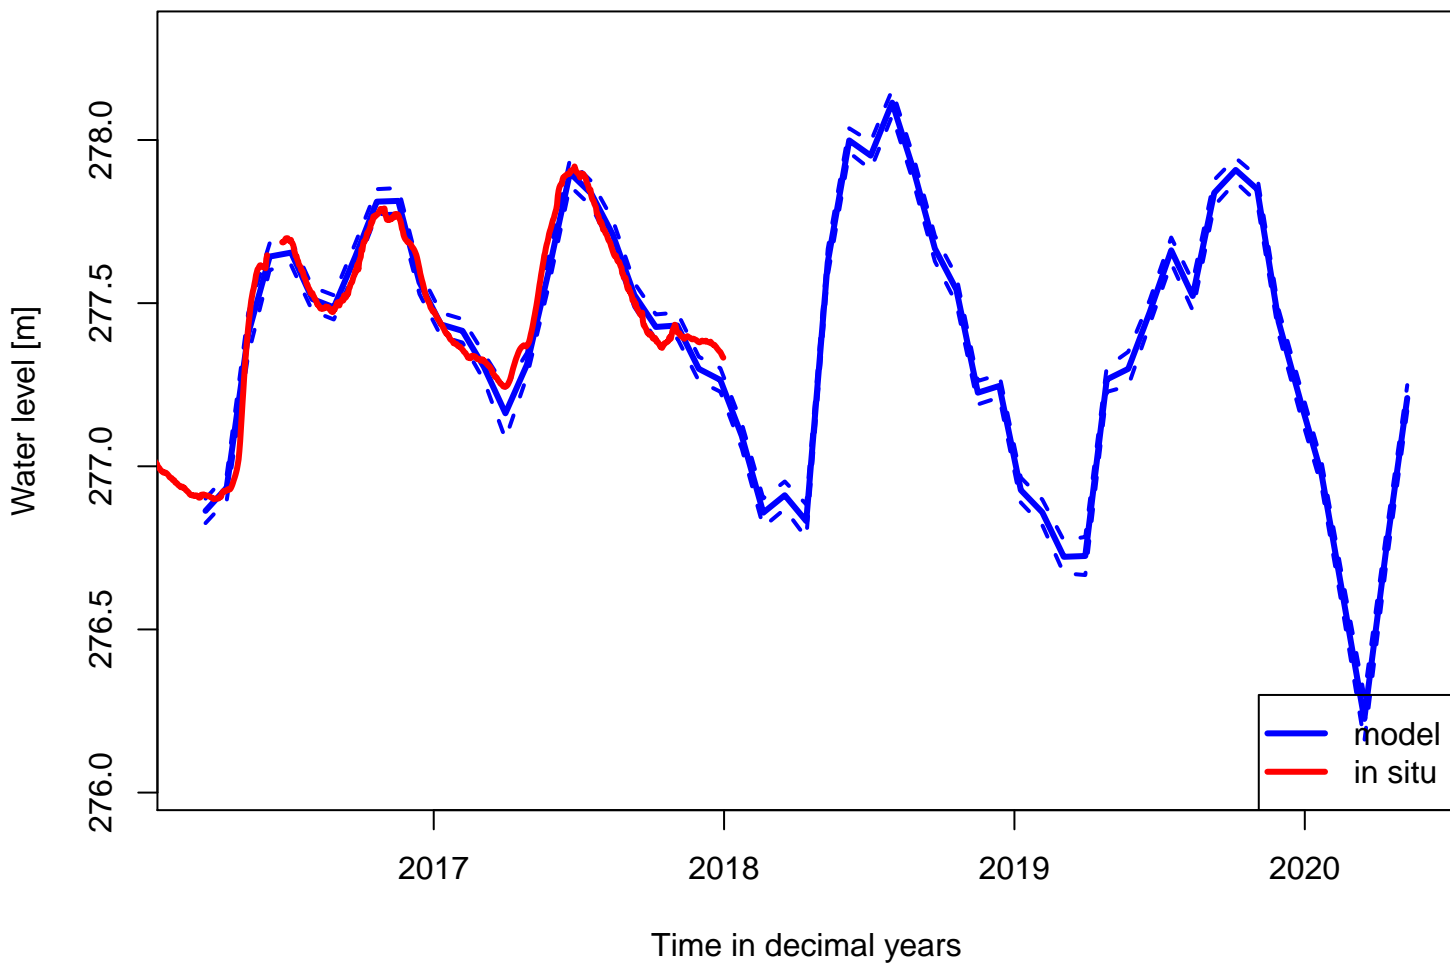

Supplement: s1 [file s1]

**lakename: La Ronge lakeid: 41 lat: 55.1 lon: -105.3**

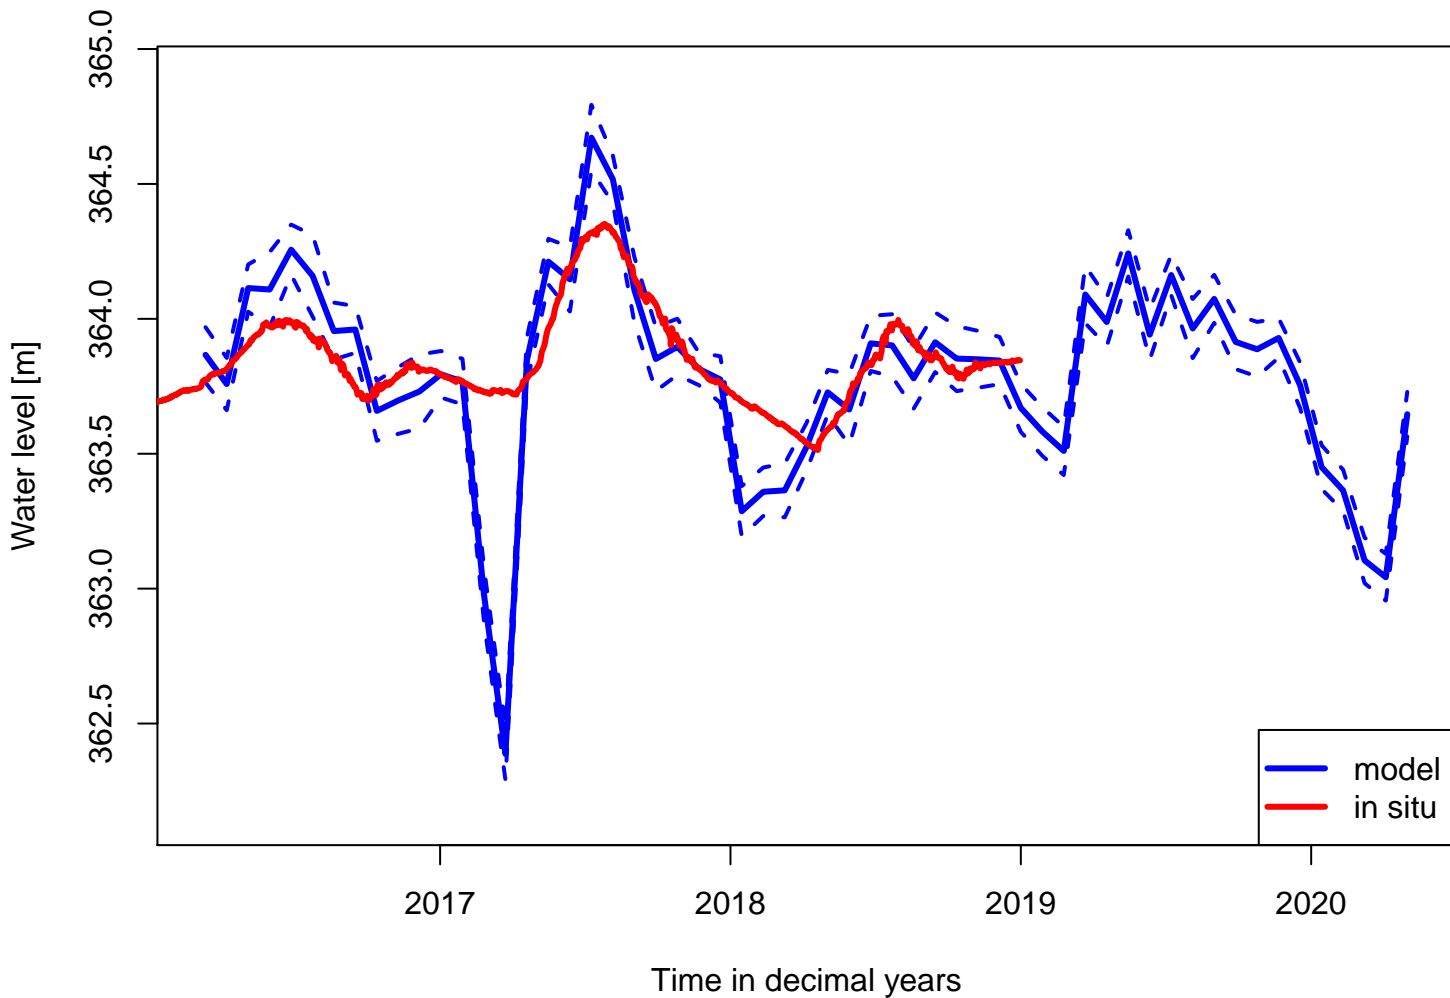

Supplement: s1 [file s1]

**lakename: Seul lakeid: 56 lat: 50.32 lon: -92.27**

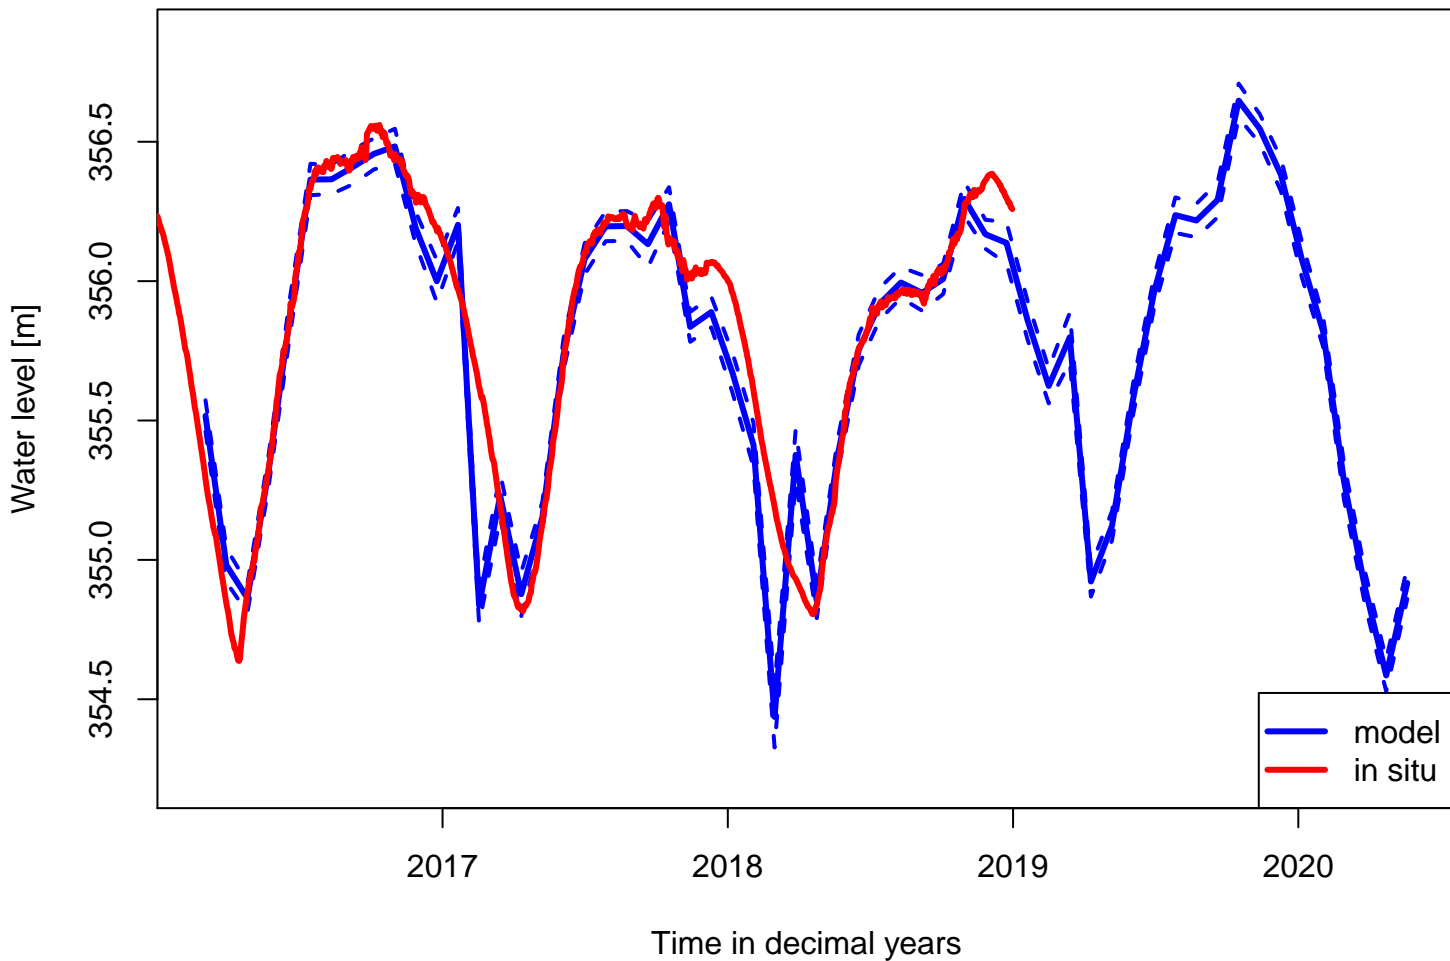

Supplement: s1 [file s1]

**lakename: Kootenay lakeid: 696 lat: 49.3 lon: -116.7**

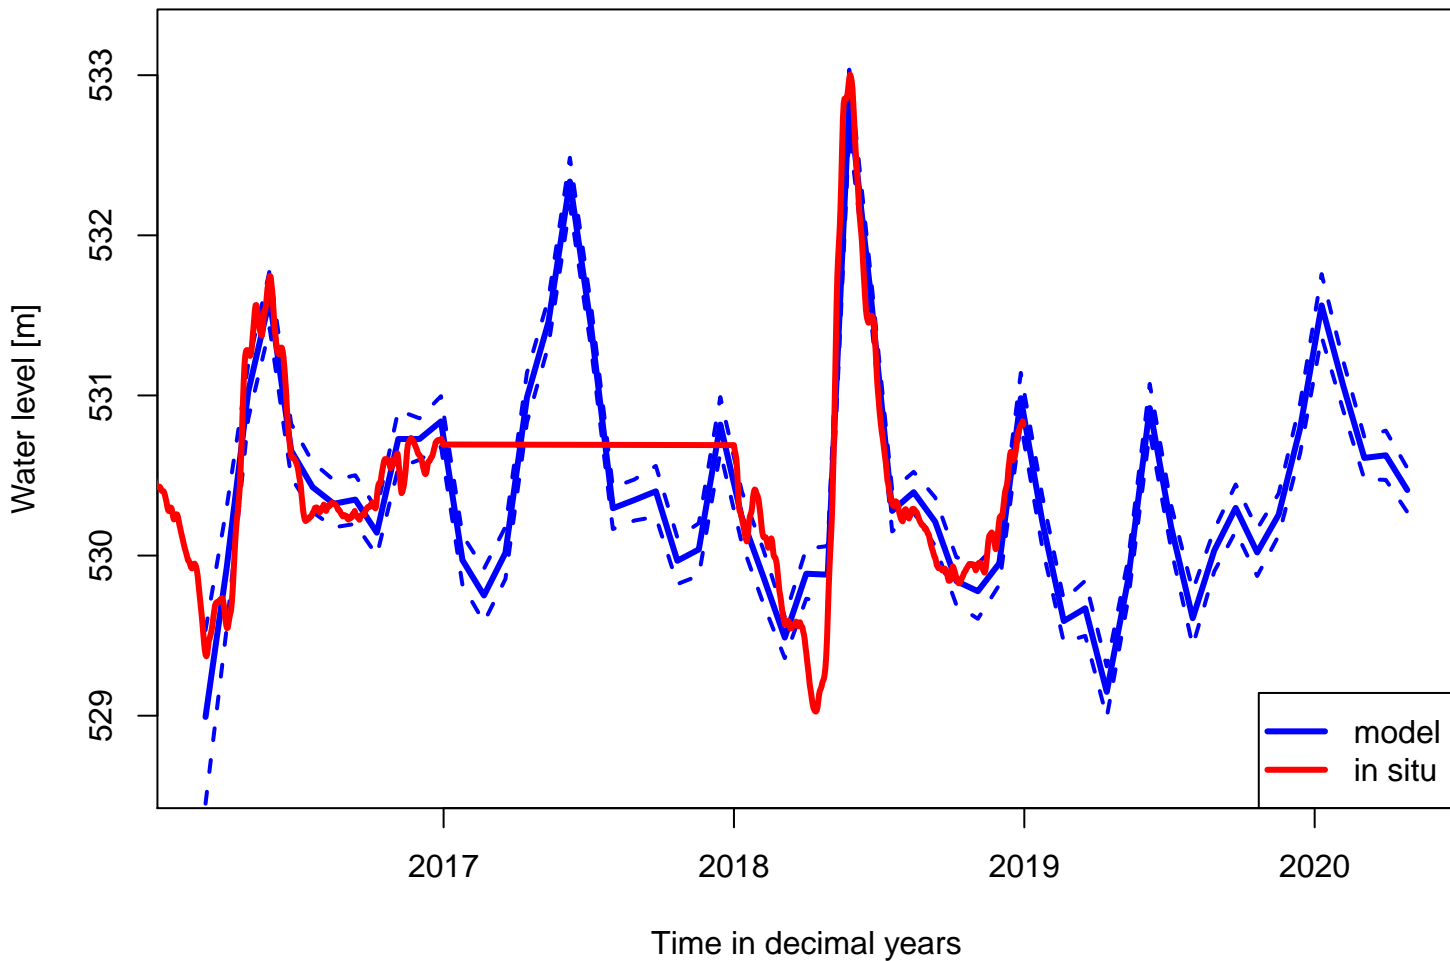

Supplement: s1 [file s1]

**lakename: Kiskitto lakeid: 564 lat: 54.3 lon: -98.44**

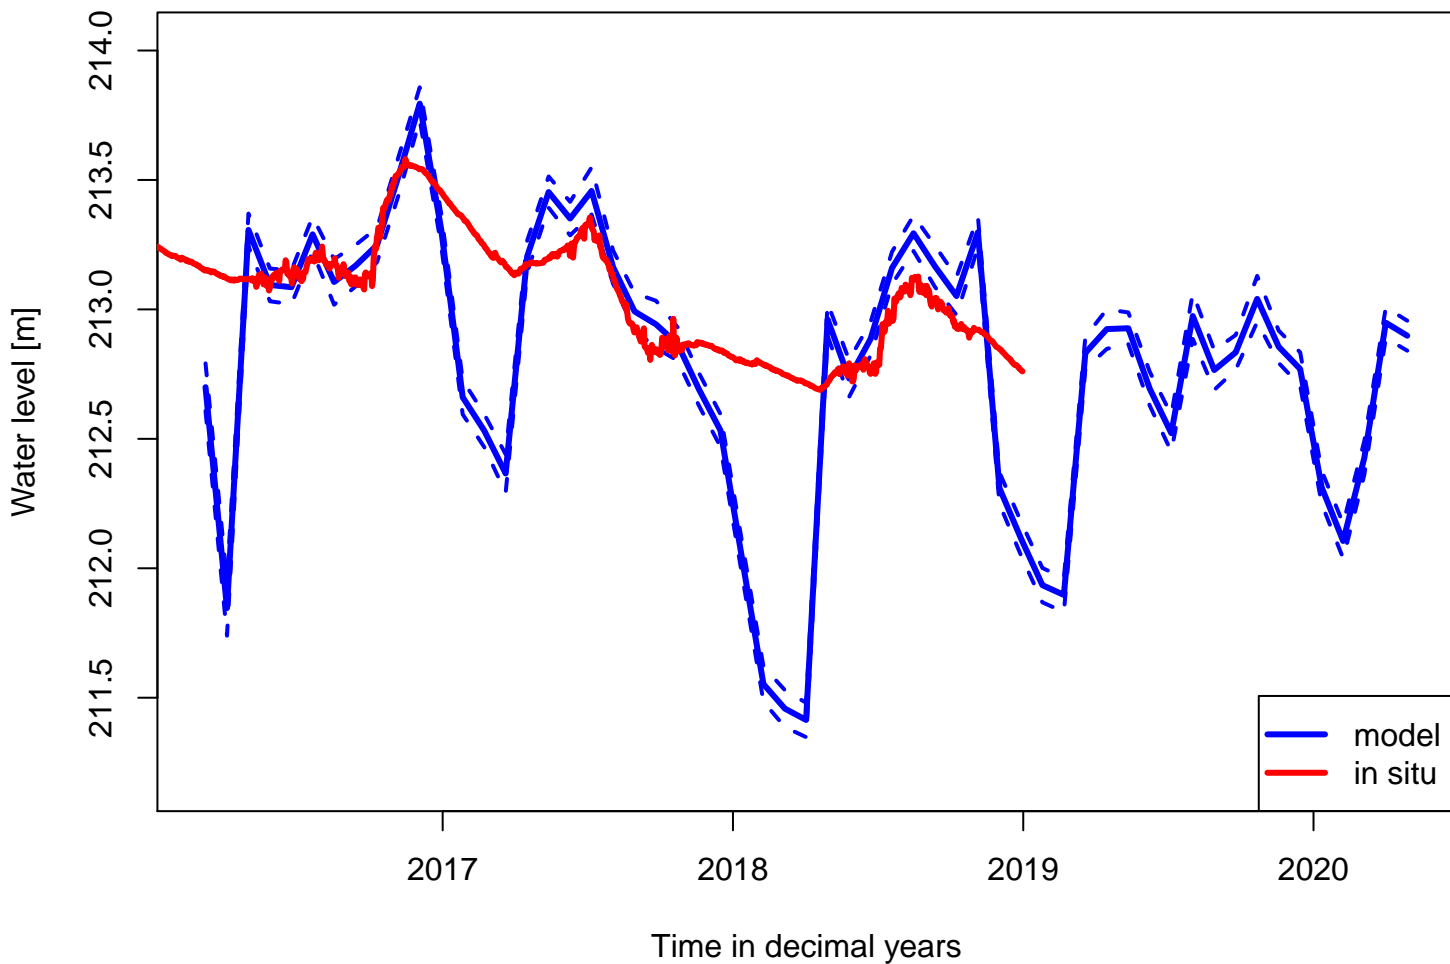

Supplement: s1 [file s1]

**lakename: Reindeer lakeid: 38 lat: 57.88 lon: -101.7**

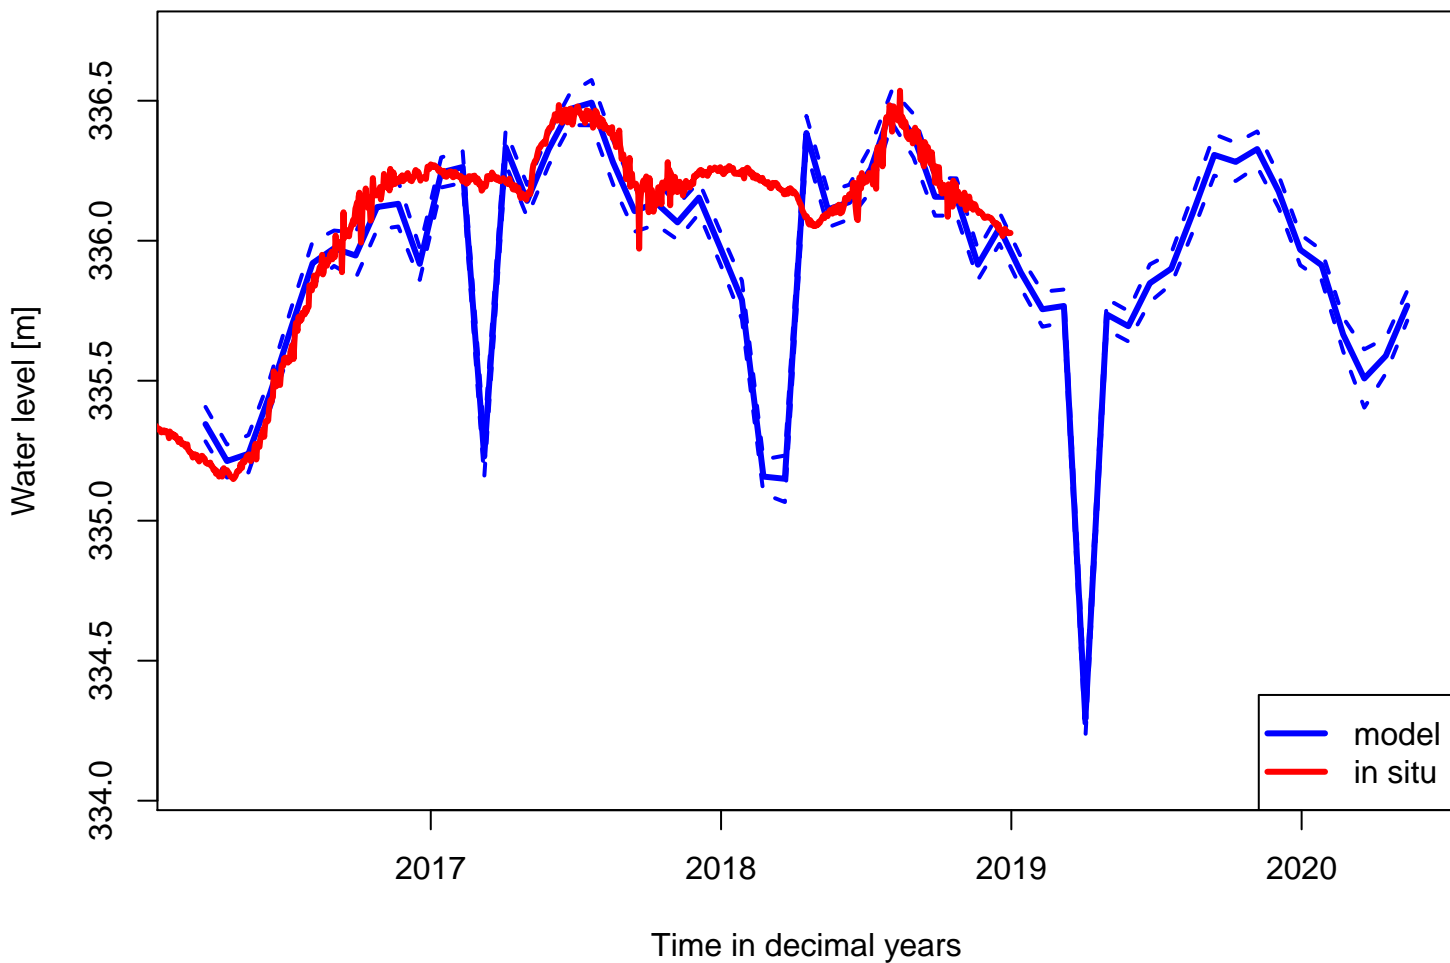

Supplement: s1 [file s1]

**lakename: Salton lakeid: 829 lat: 33.19 lon: -115.8**

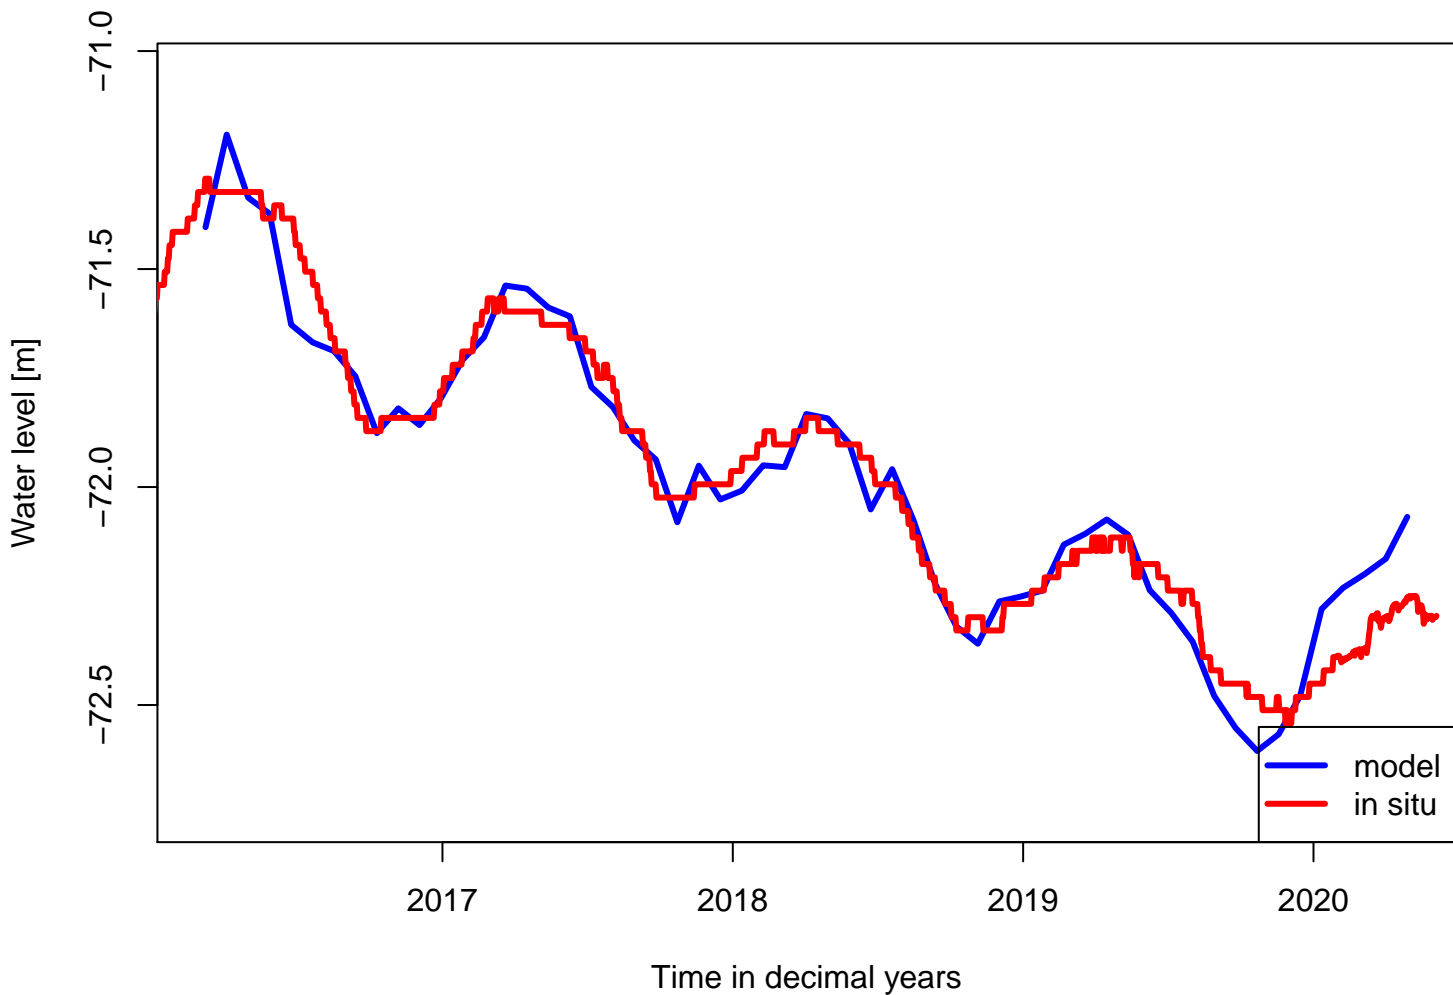

Supplement: s1 [file s1]

**lakename: Timiskaming lakeid: 737 lat: 47.45 lon: -79.63**

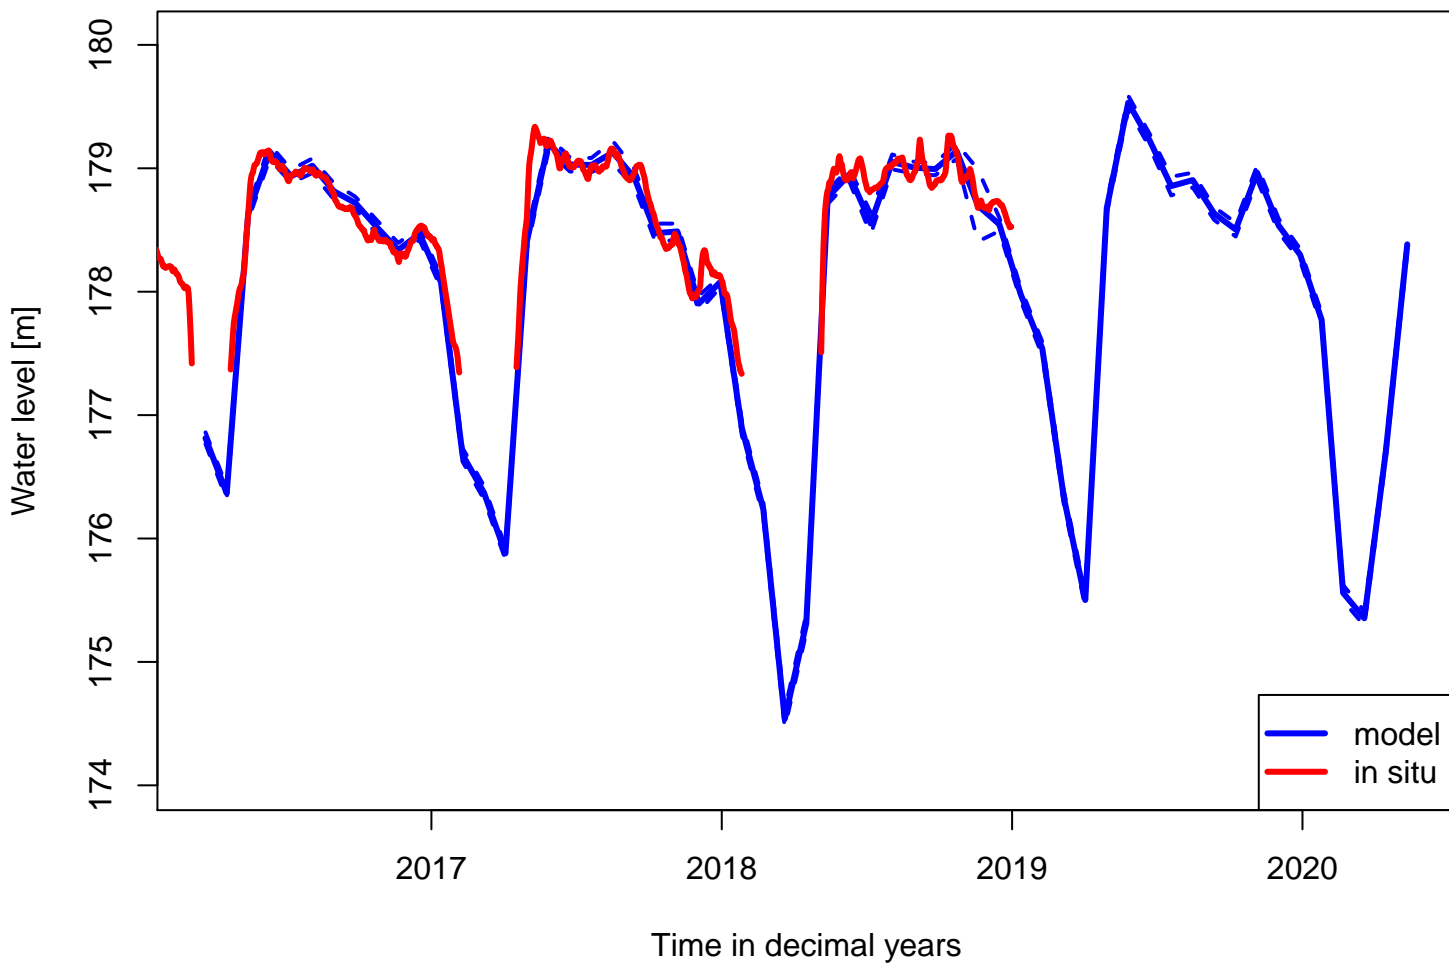

Supplement: s1 [file s1]

**lakename: Claire lakeid: 34 lat: 58.63 lon: -111.7**

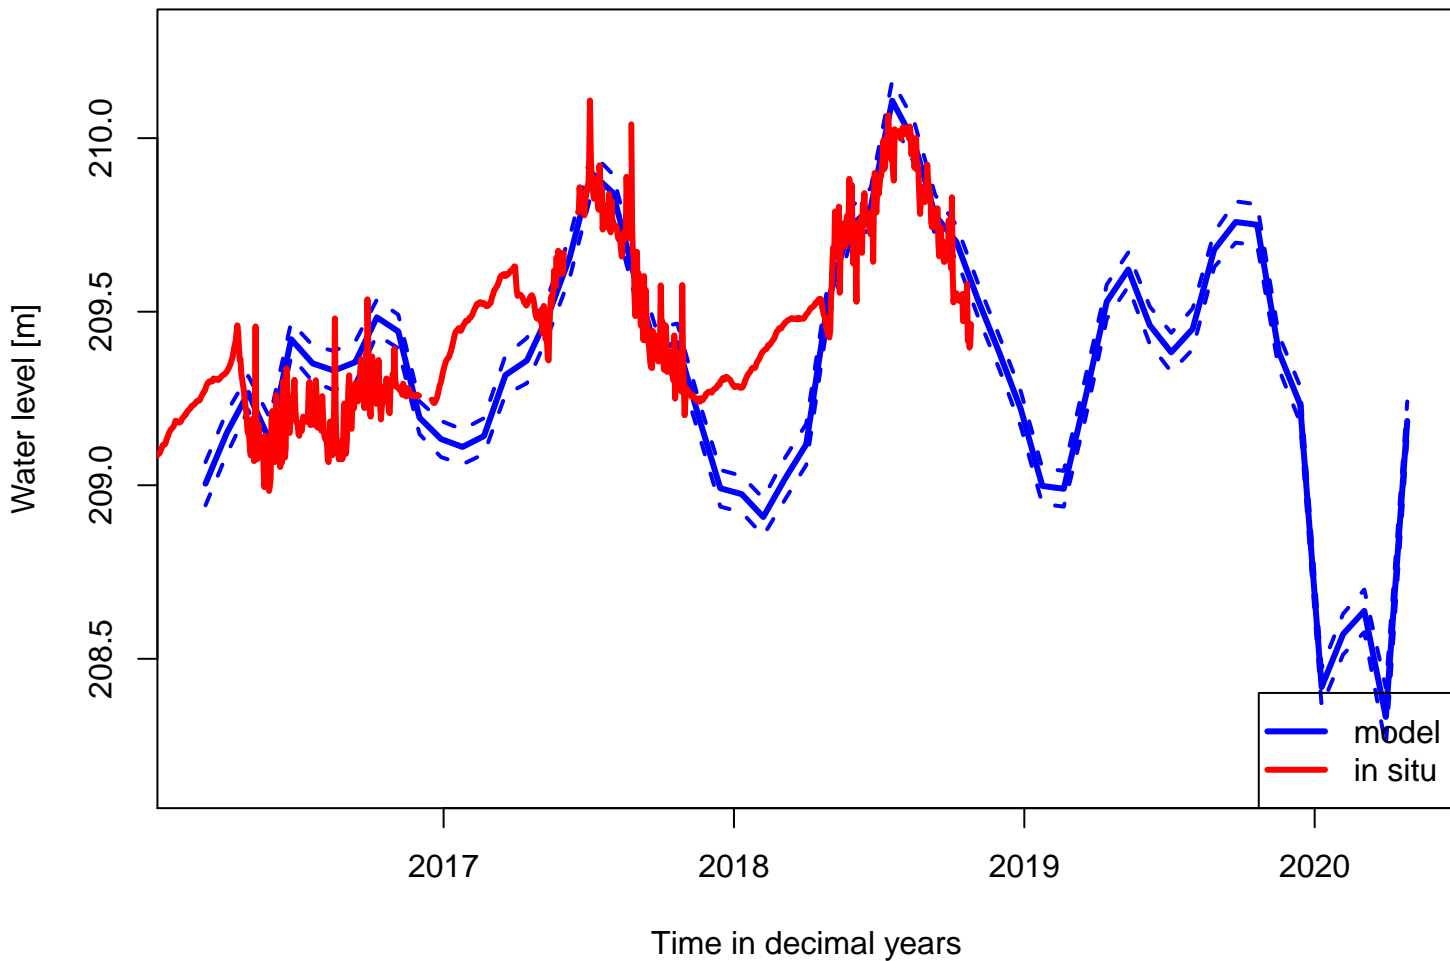

Supplement: s1 [file s1]

**lakename: lakeid: 579 lat: 54.01 lon: -125**

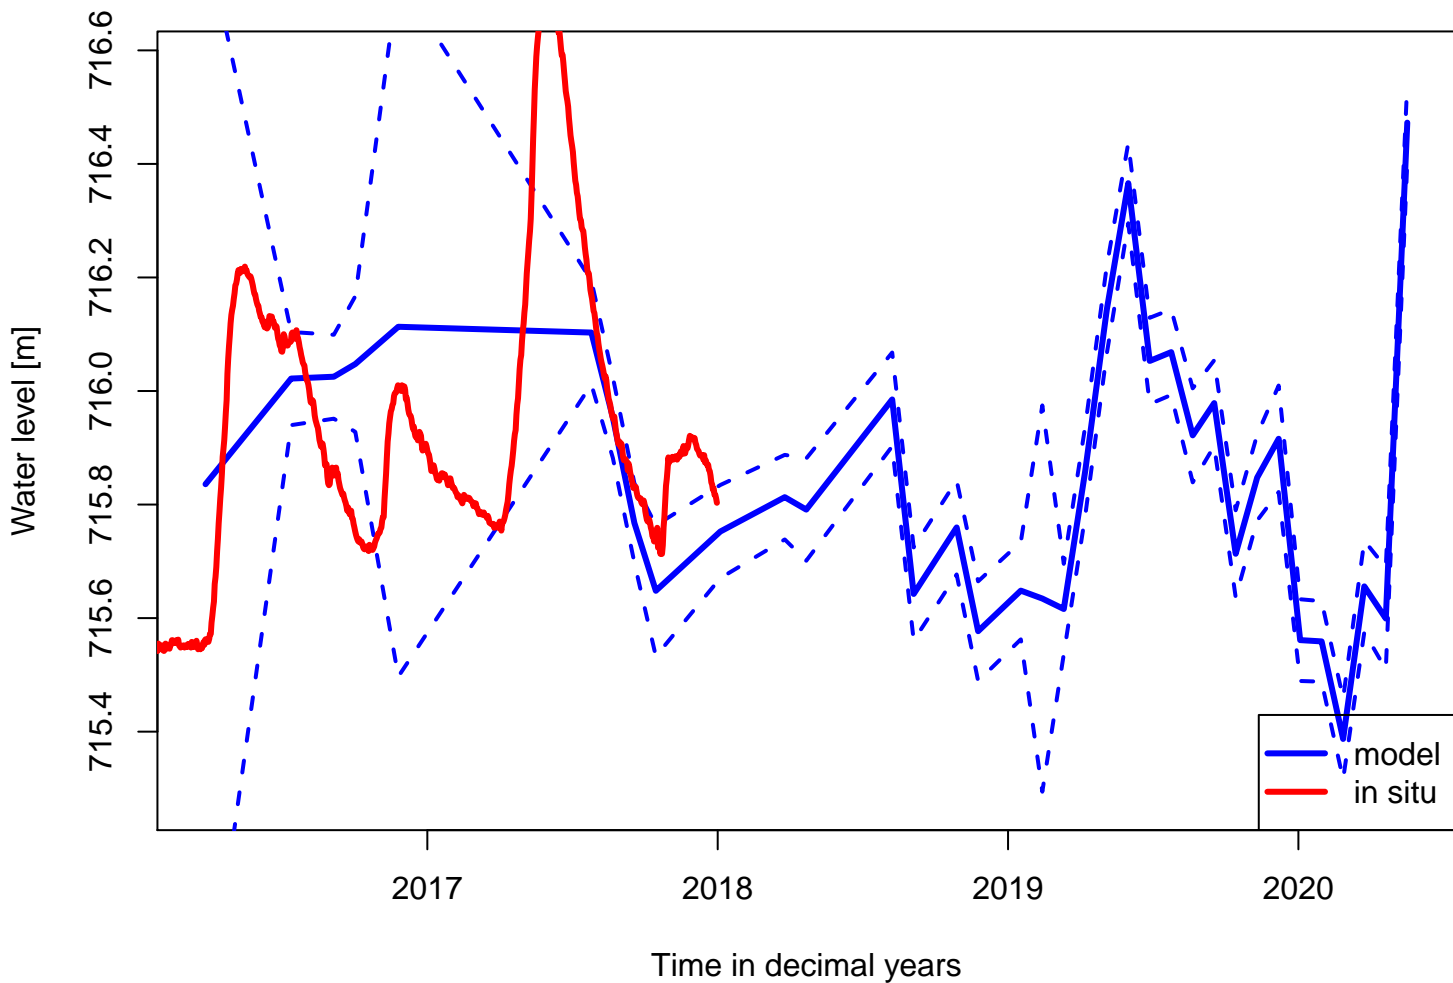

Supplement: s1 [file s1]

**lakename: Salton lakeid: 829 lat: 33.19 lon: -115.8**

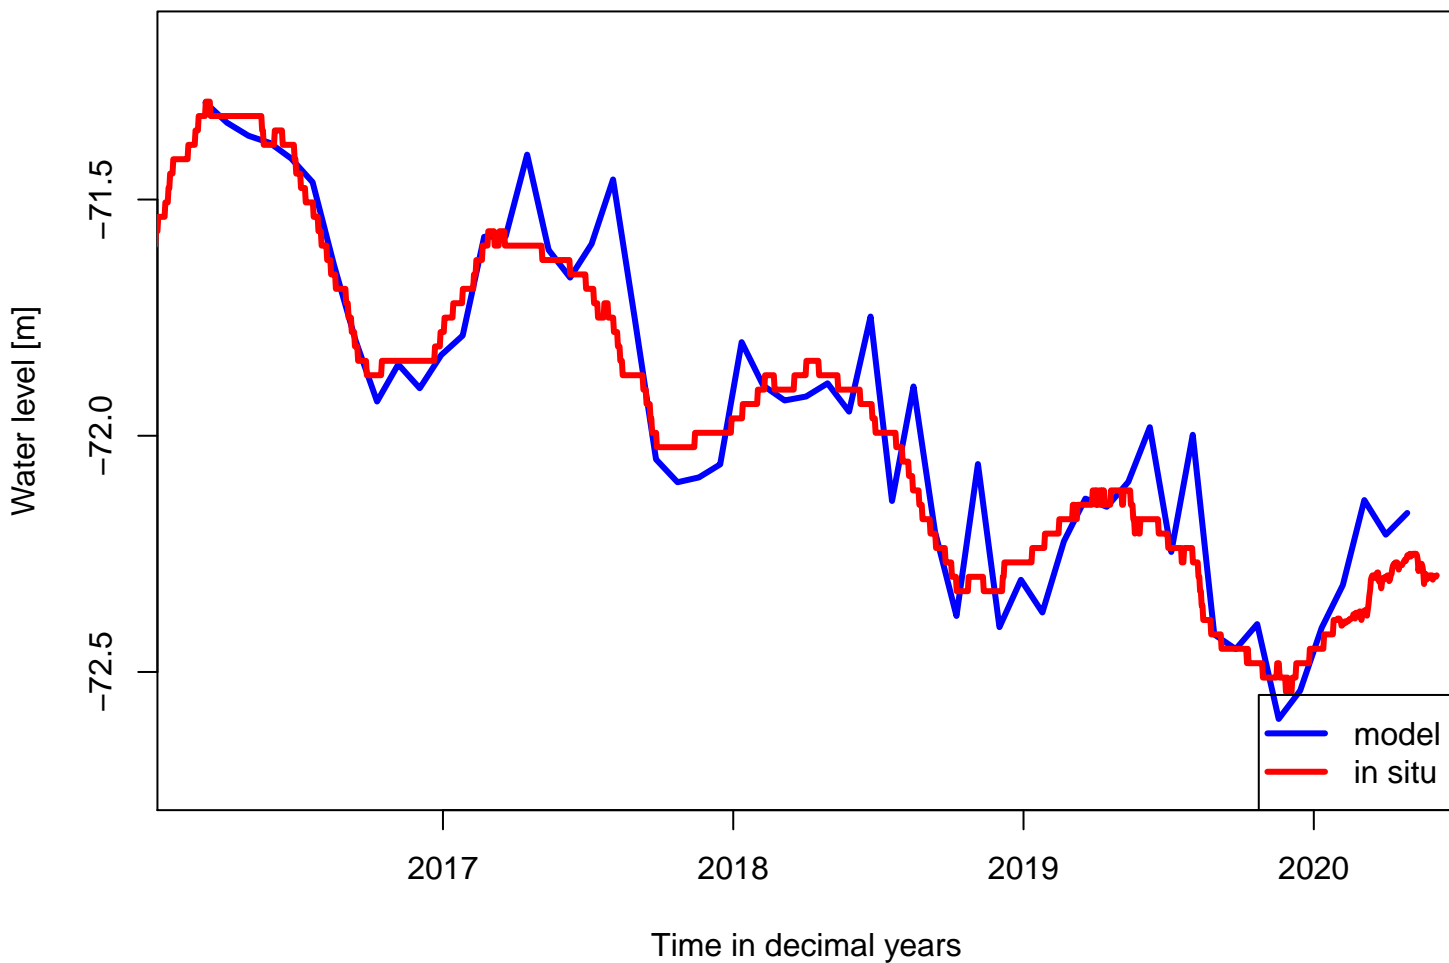

Supplement: s1 [file s1]

**lakename: Joseph lakeid: 756 lat: 45.12 lon: -79.58**

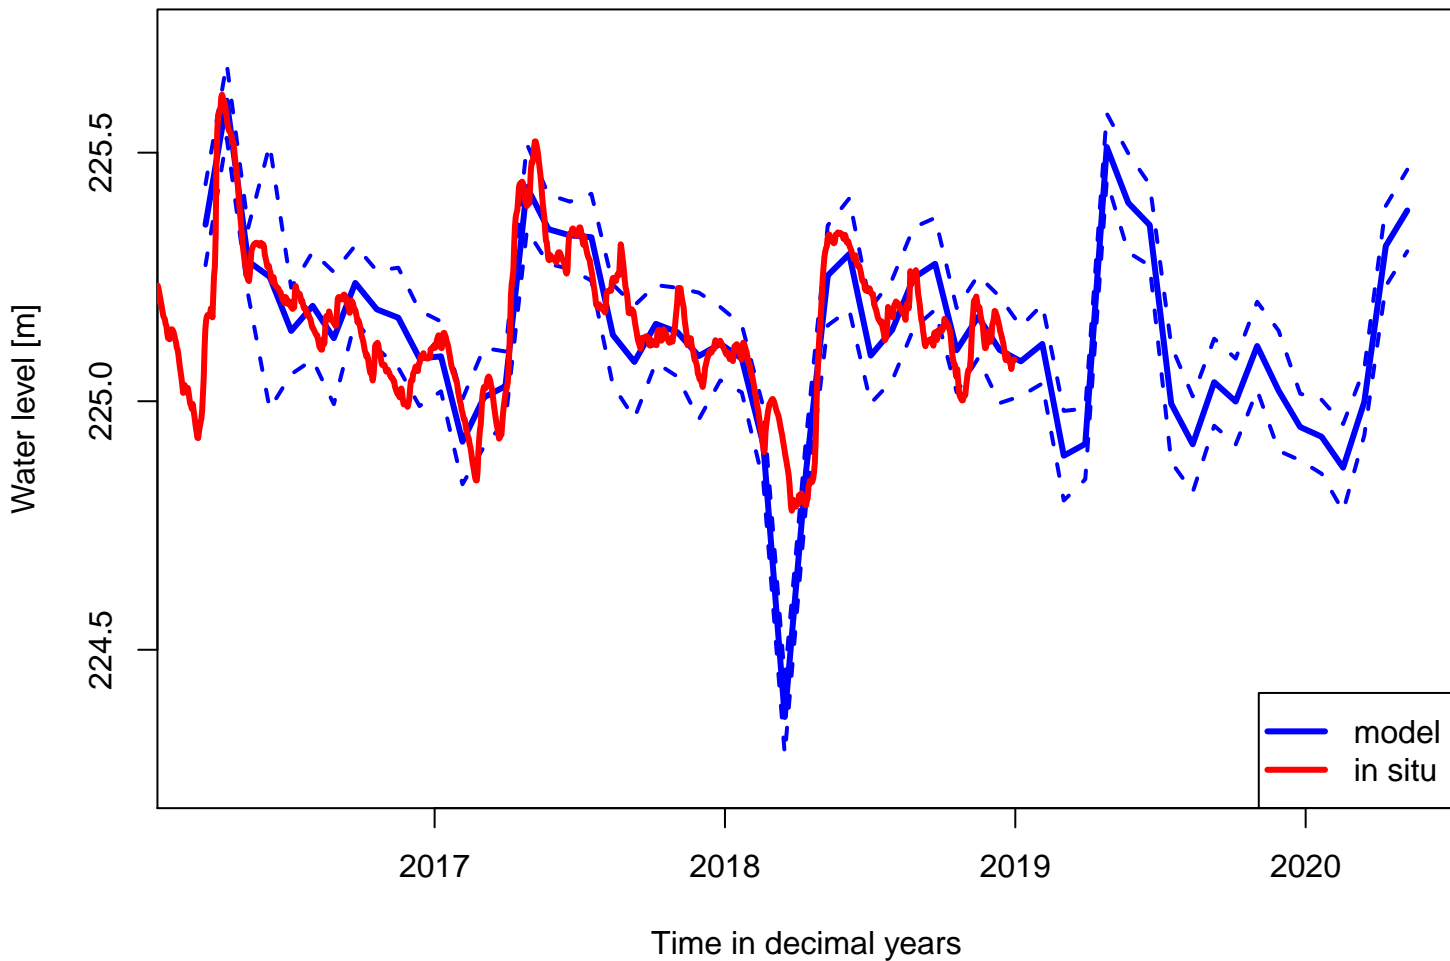

Supplement: s1 [file s1]

**lakename: Nonacho lakeid: 359 lat: 61.73 lon: -109.7**

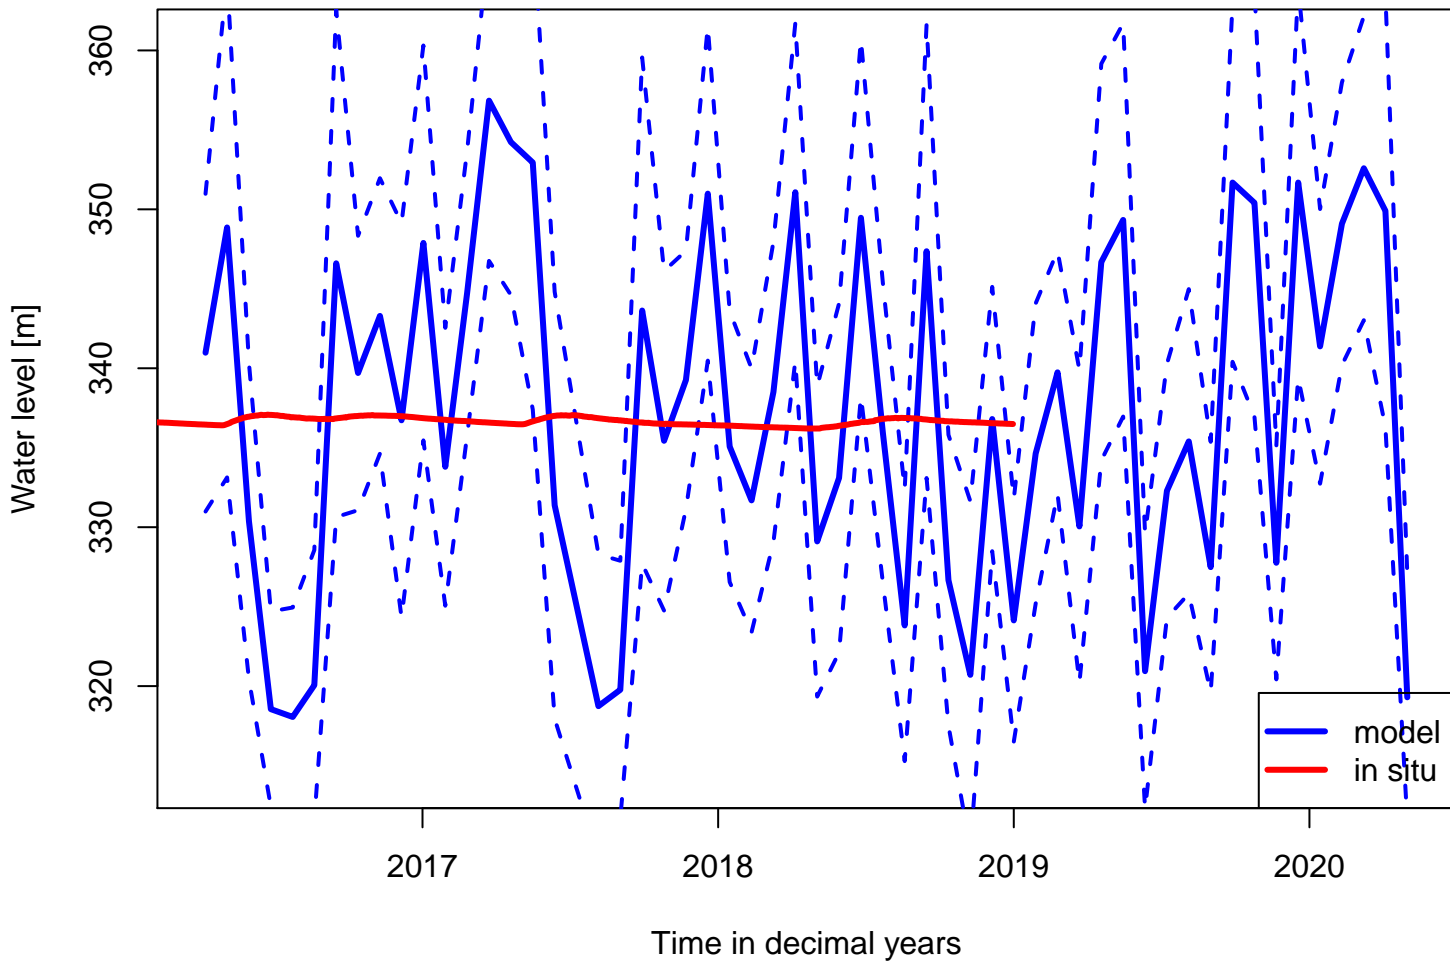

Supplement: s1 [file s1]

**lakename: Franklin D. Roosevelt lakeid: 724 lat: 47.96 lon: -119**

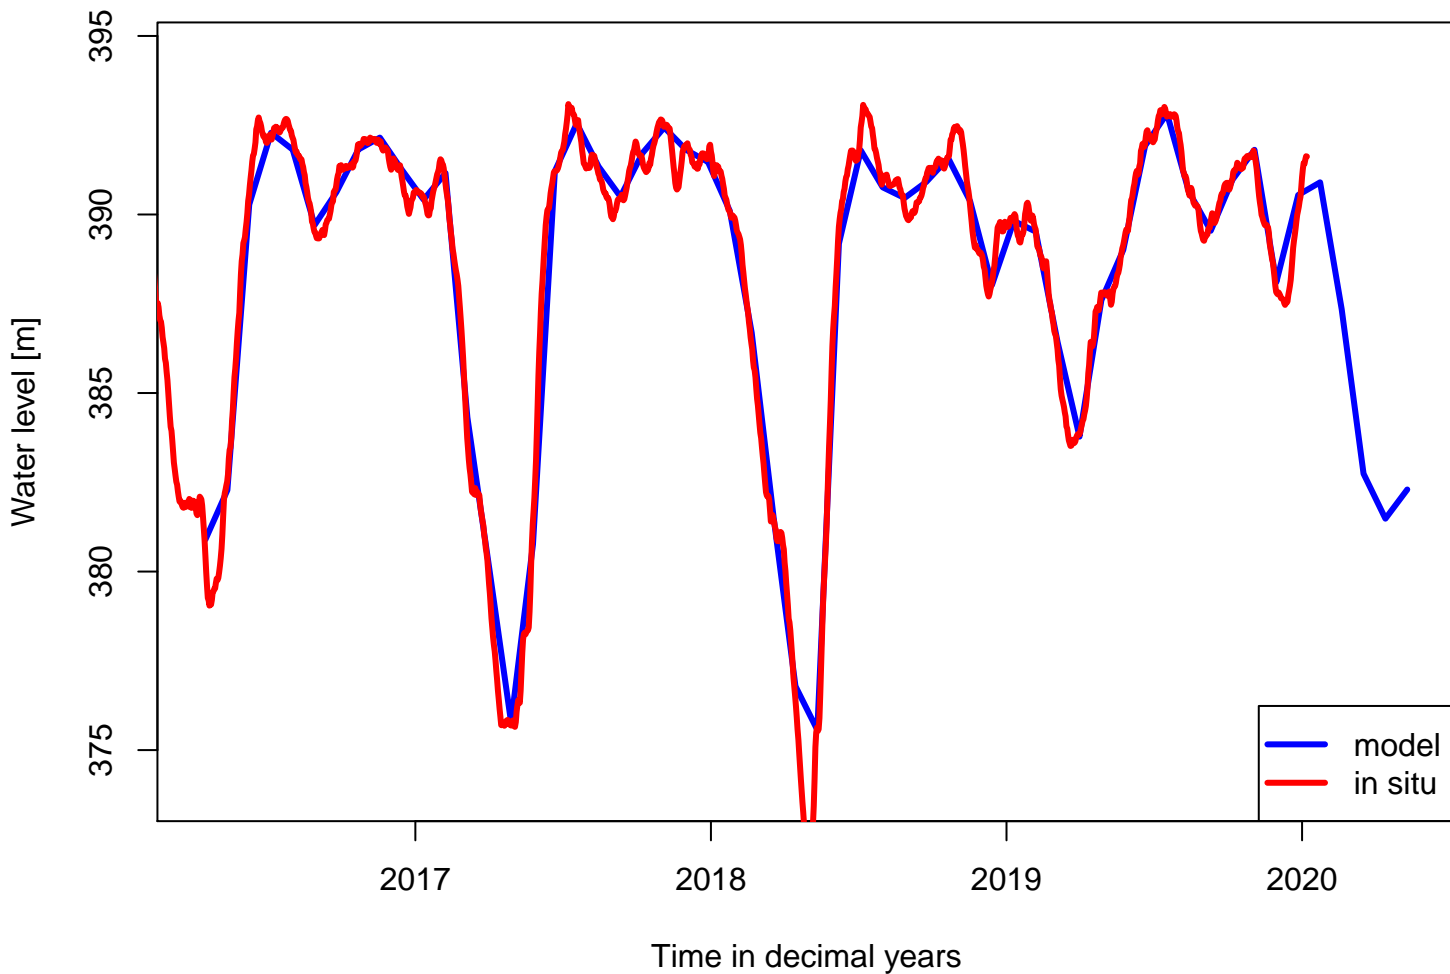

Supplement: s1 [file s1]

**lakename: Split lakeid: 479 lat: 56.24 lon: -96.09**

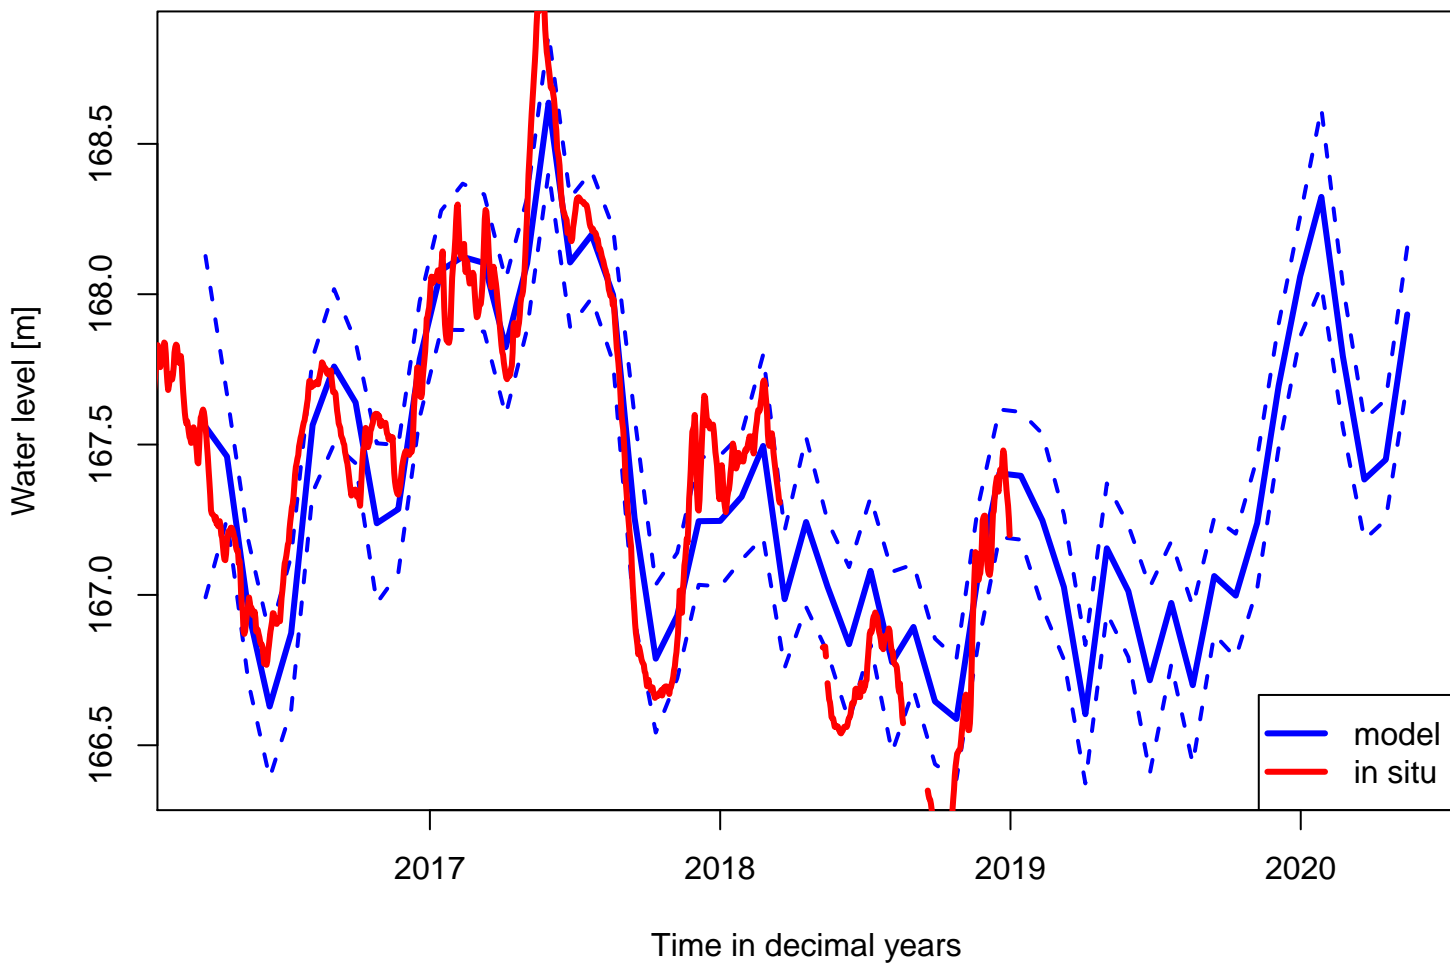

Supplement: s1 [file s1]

**lakename: Wabamun lakeid: 6821 lat: 53.56 lon: -114.5**

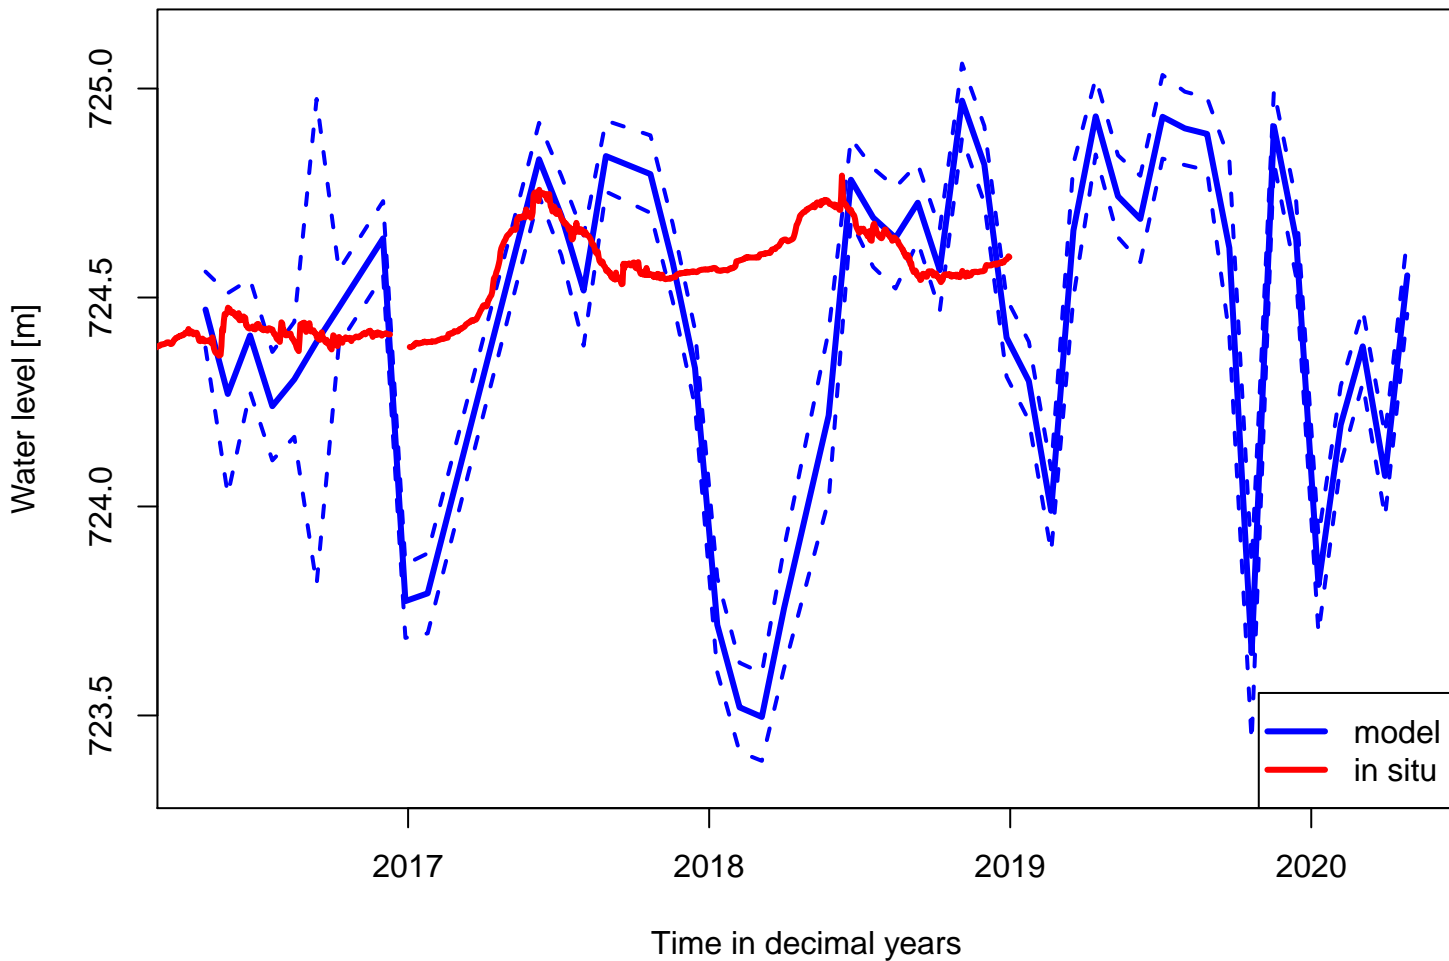

Supplement: s1 [file s1]

**lakename: Stockton Lake lakeid: 9273 lat: 37.69 lon: -93.77**

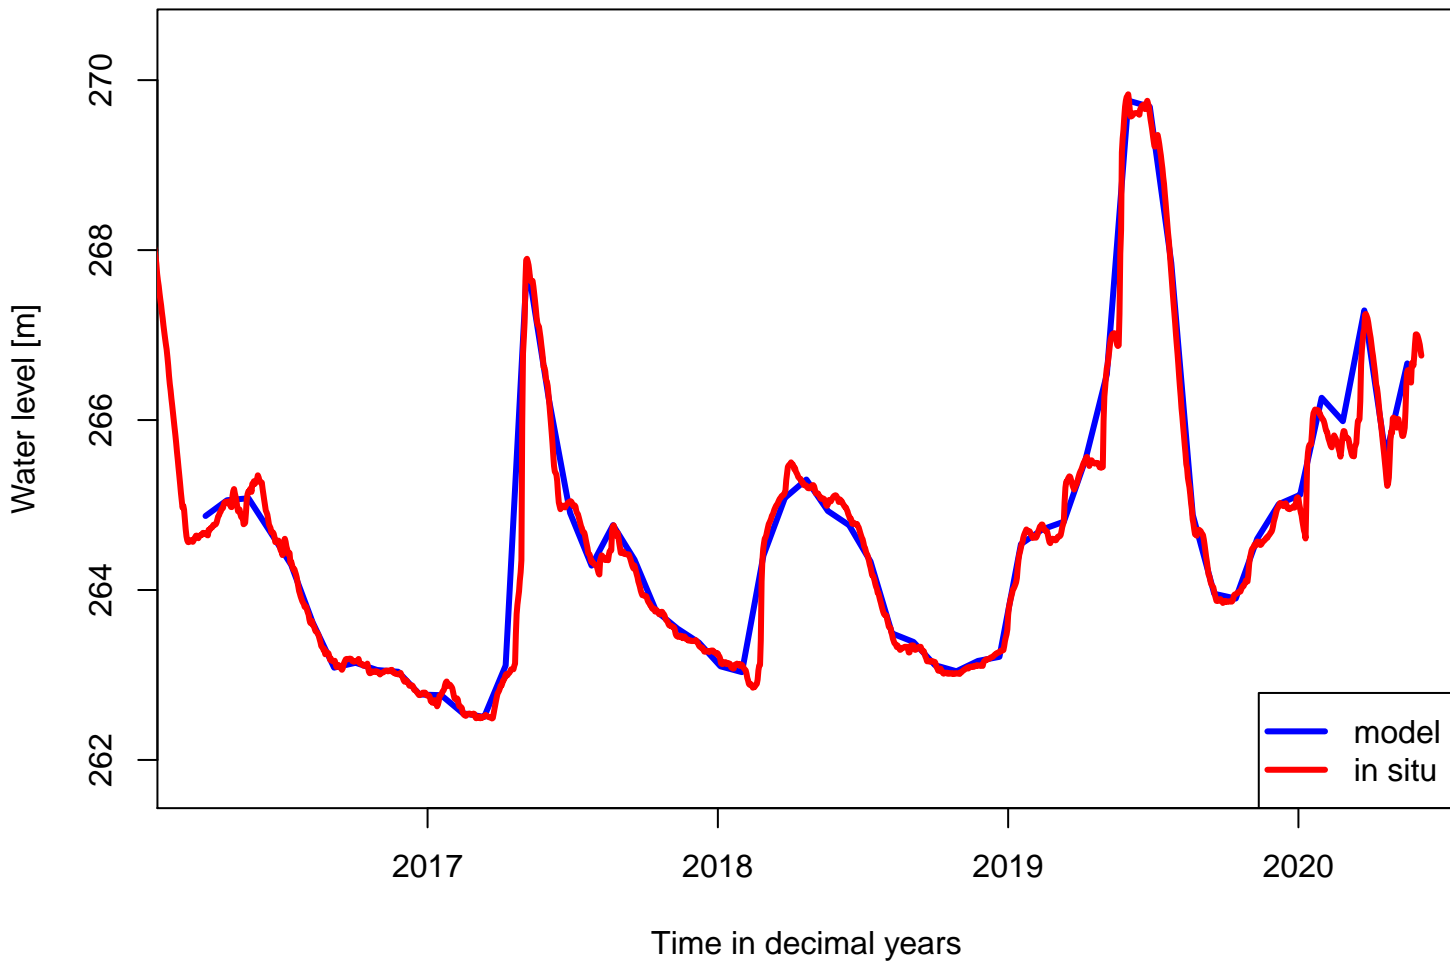

Supplement: s1 [file s1]

**lakename: Sipiwesk lakeid: 520 lat: 54.88 lon: -98.37**

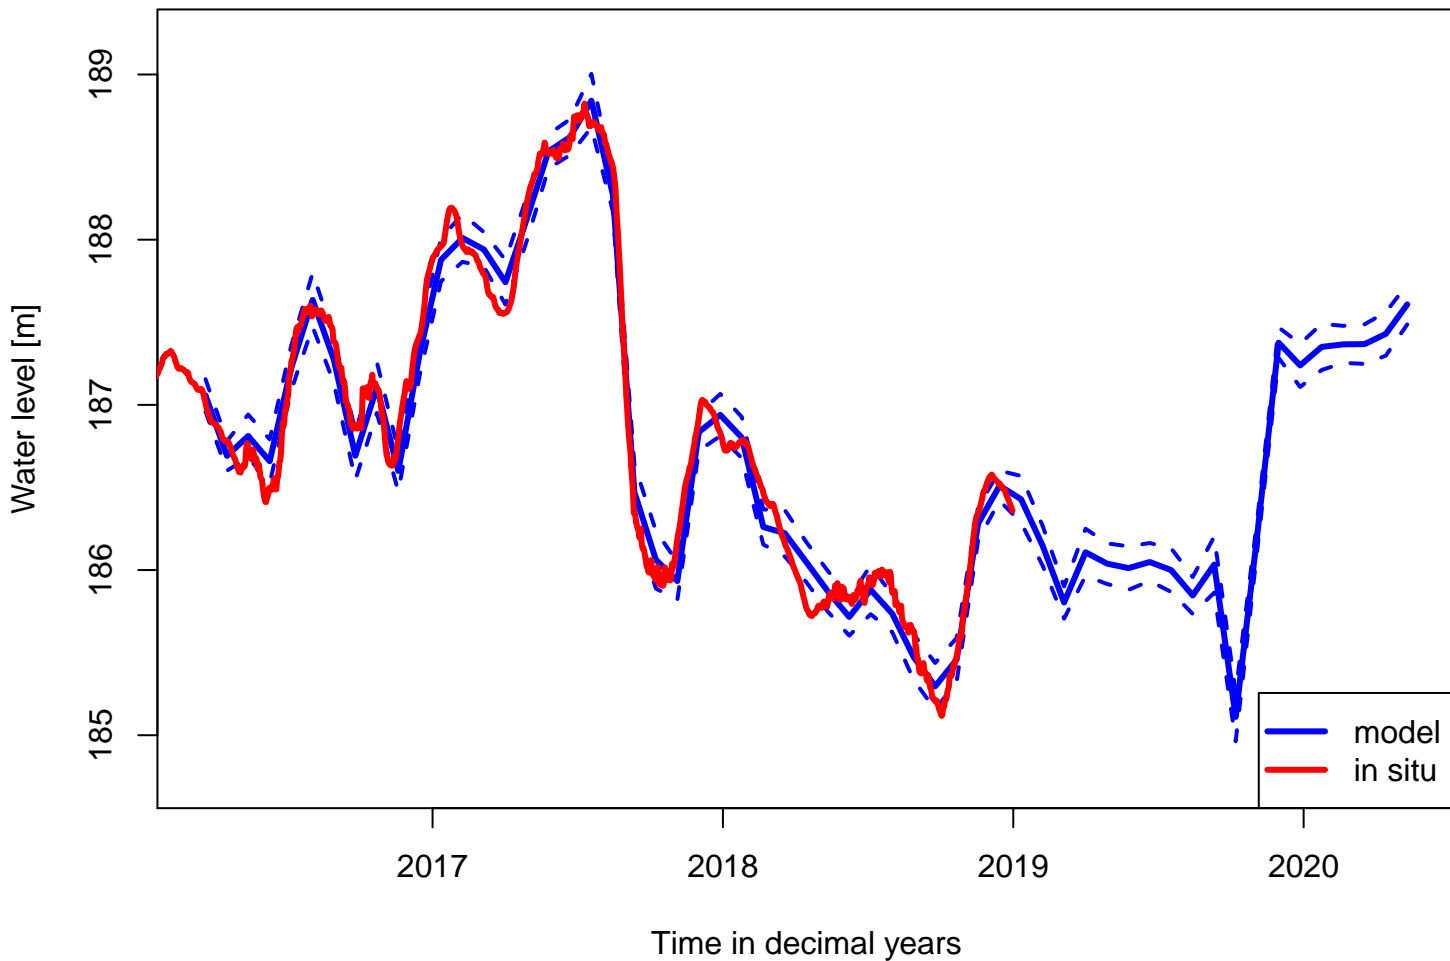

Supplement: s1 [file s1]

**lakename: Melville lakeid: 50 lat: 53.33 lon: -60.19**

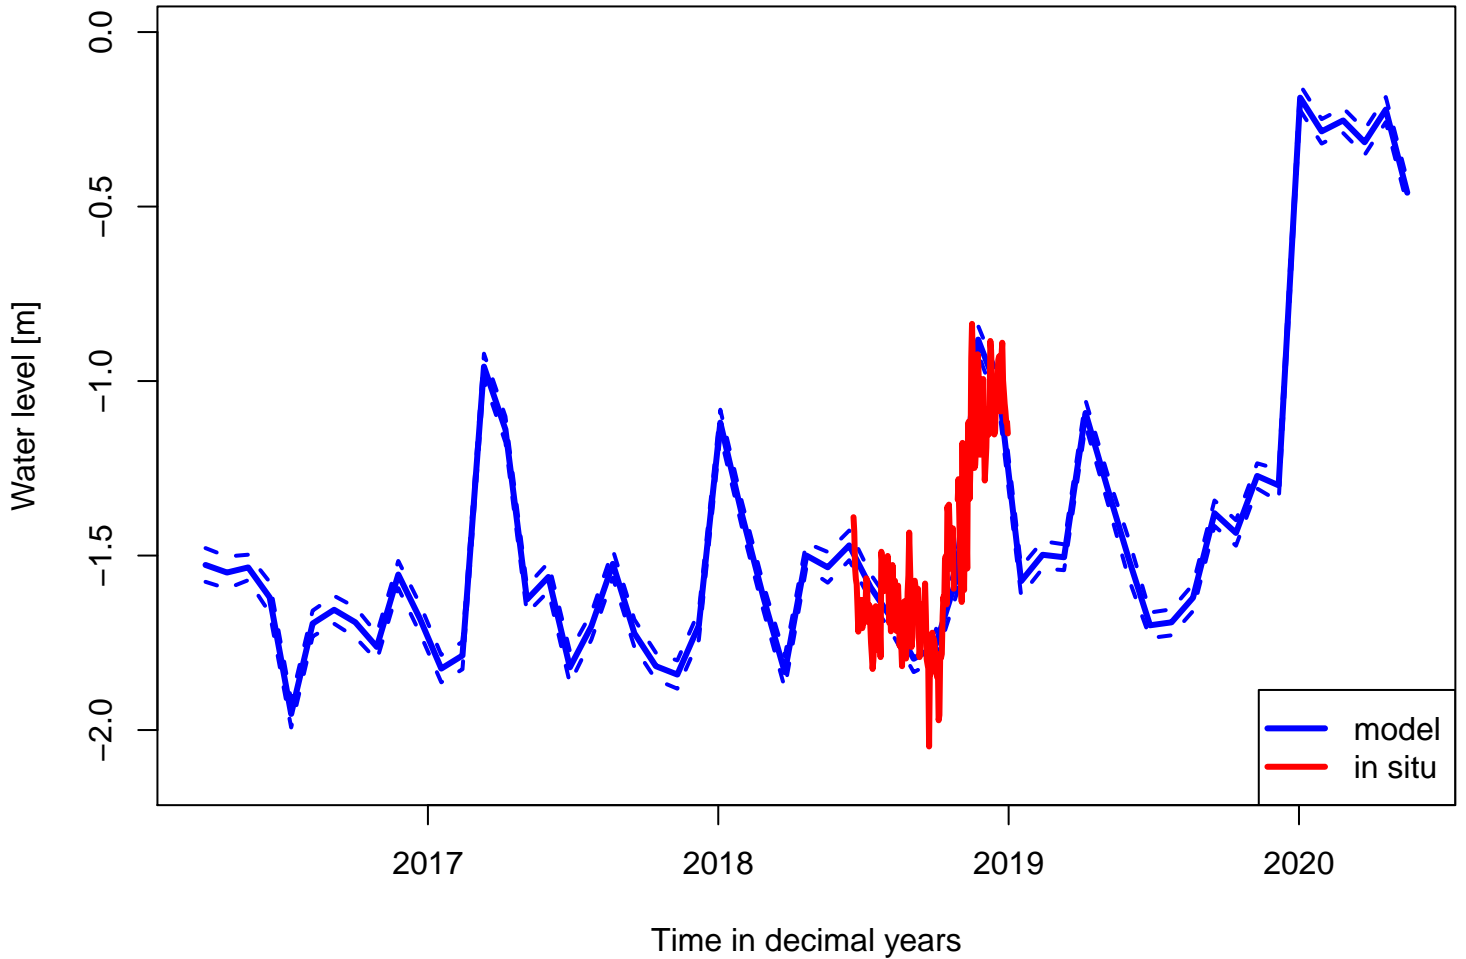

Supplement: s1 [file s1]

**lakename: lakeid: 401 lat: 60.16 lon: -134.7**

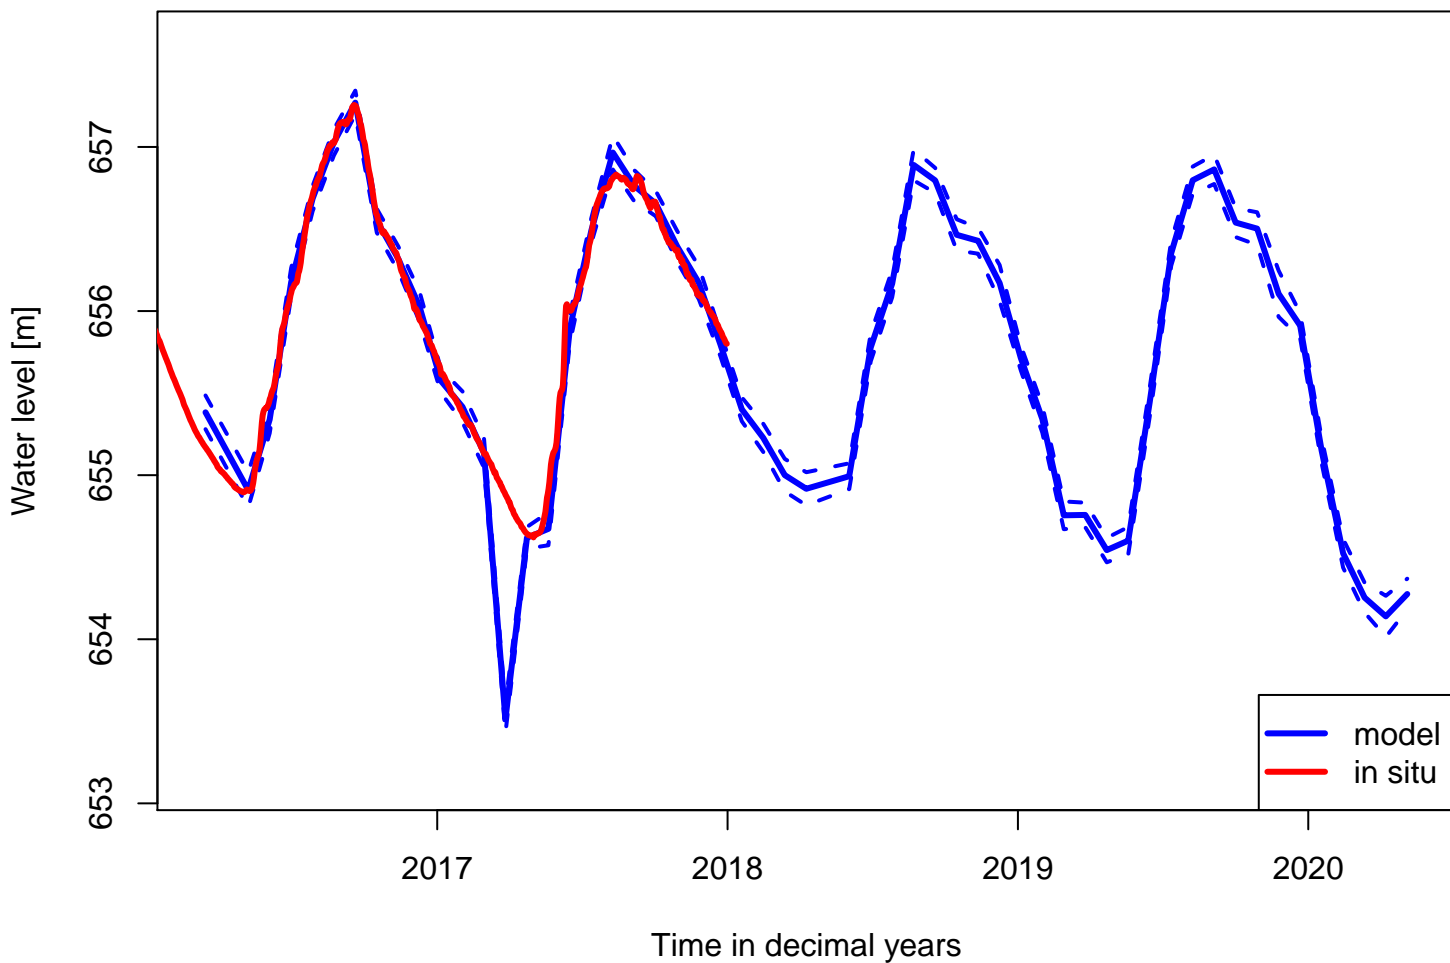

Supplement: s1 [file s1]

**lakename: Woods lakeid: 57 lat: 49.33 lon: -94.85**

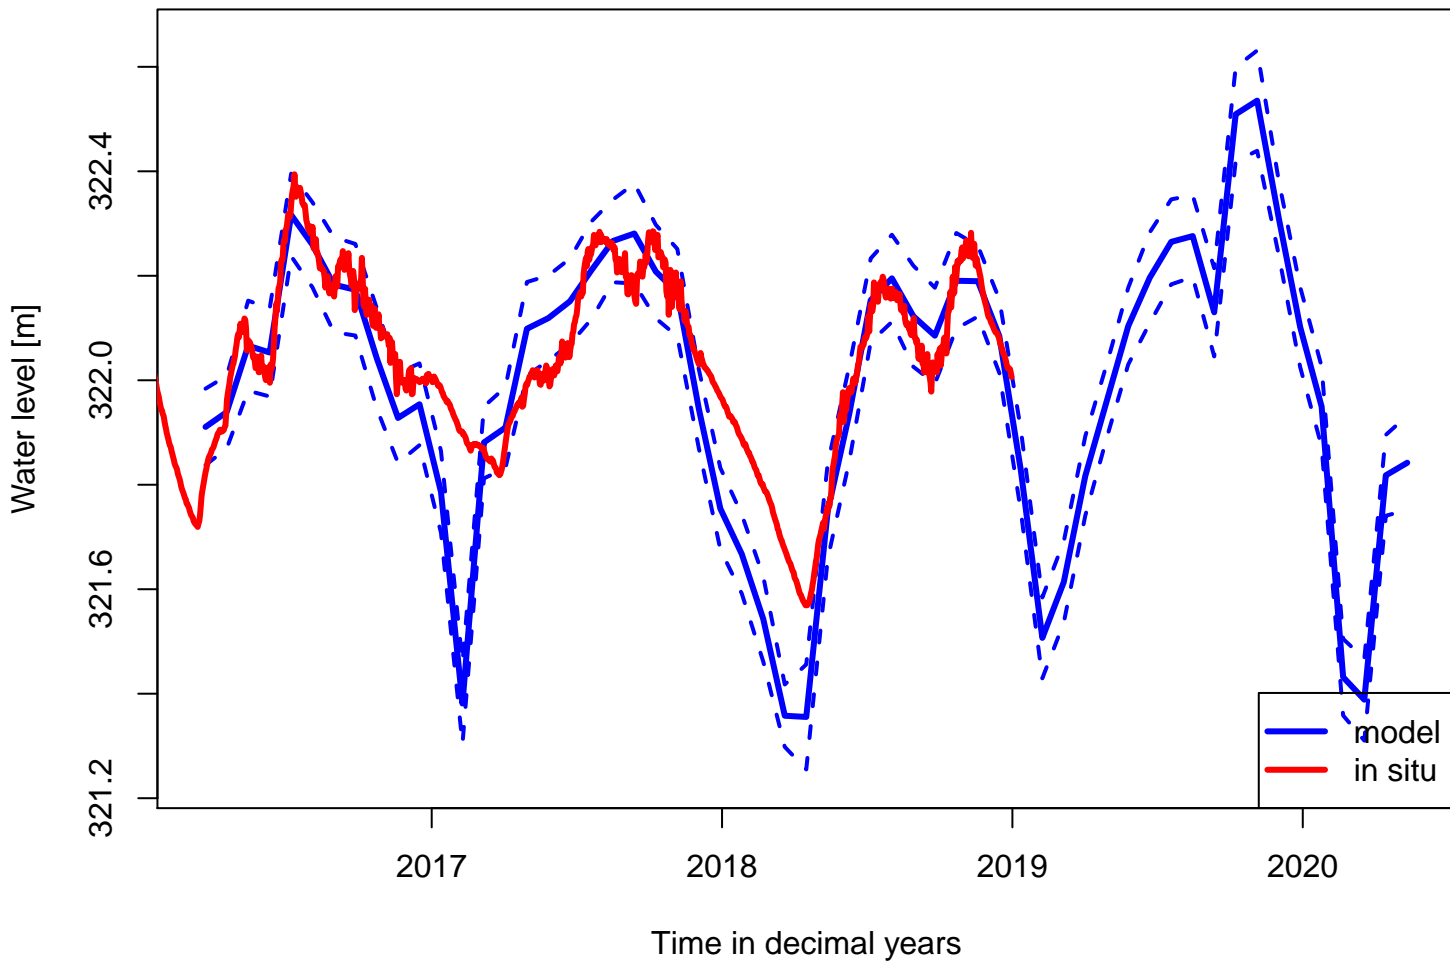

Supplement: s1 [file s1]

**lakename: Egg lakeid: 527 lat: 55.09 lon: -105.4**

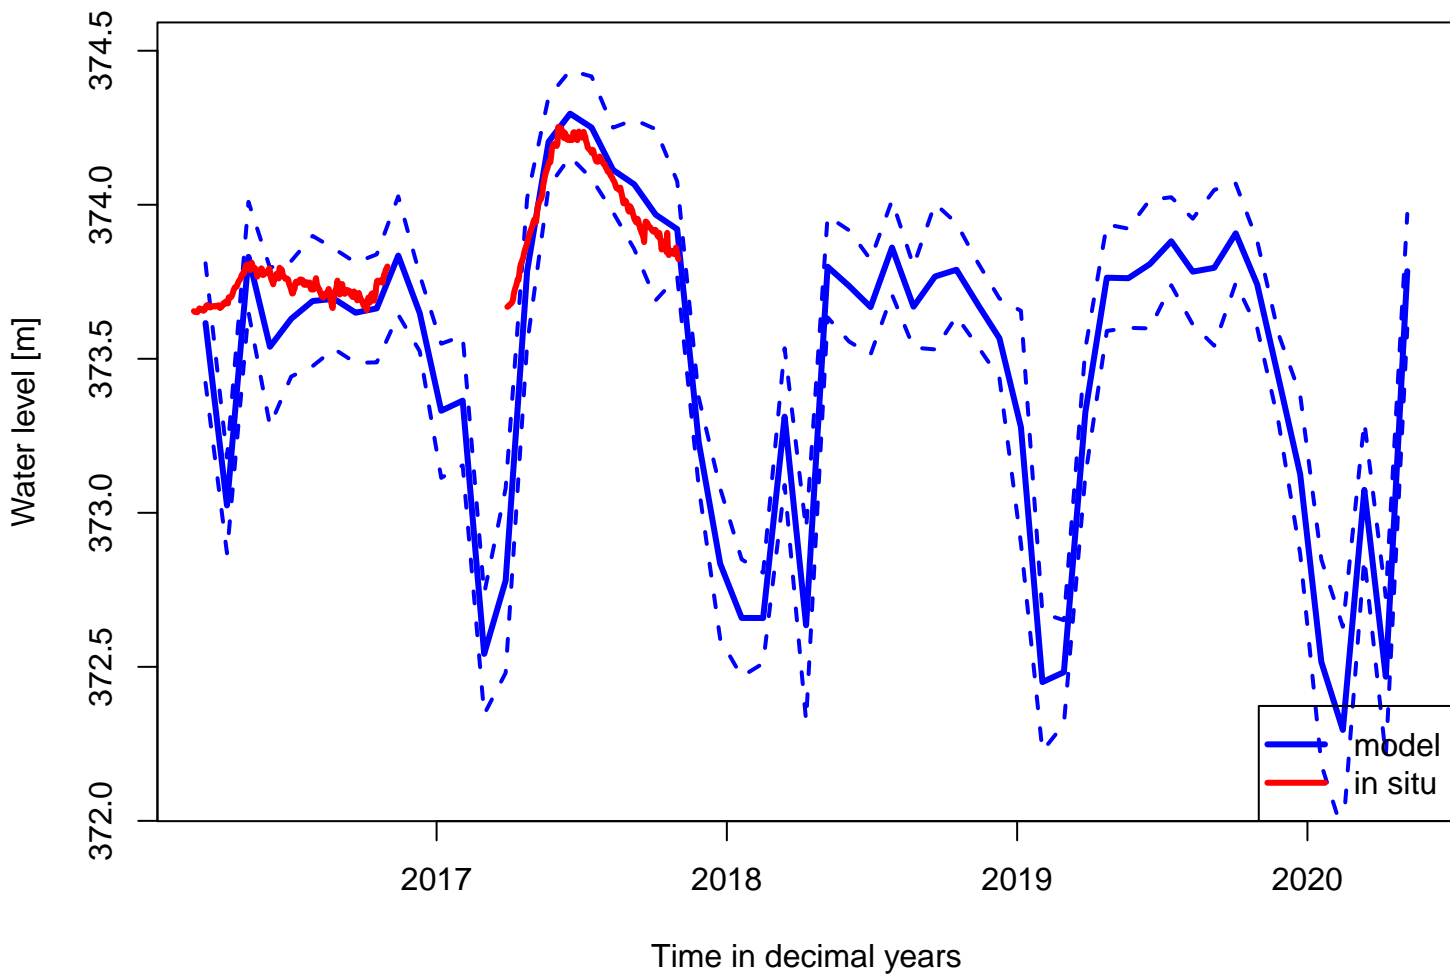

Supplement: s1 [file s1]

**lakename: lakeid: 609 lat: 52.96 lon: -87.69**

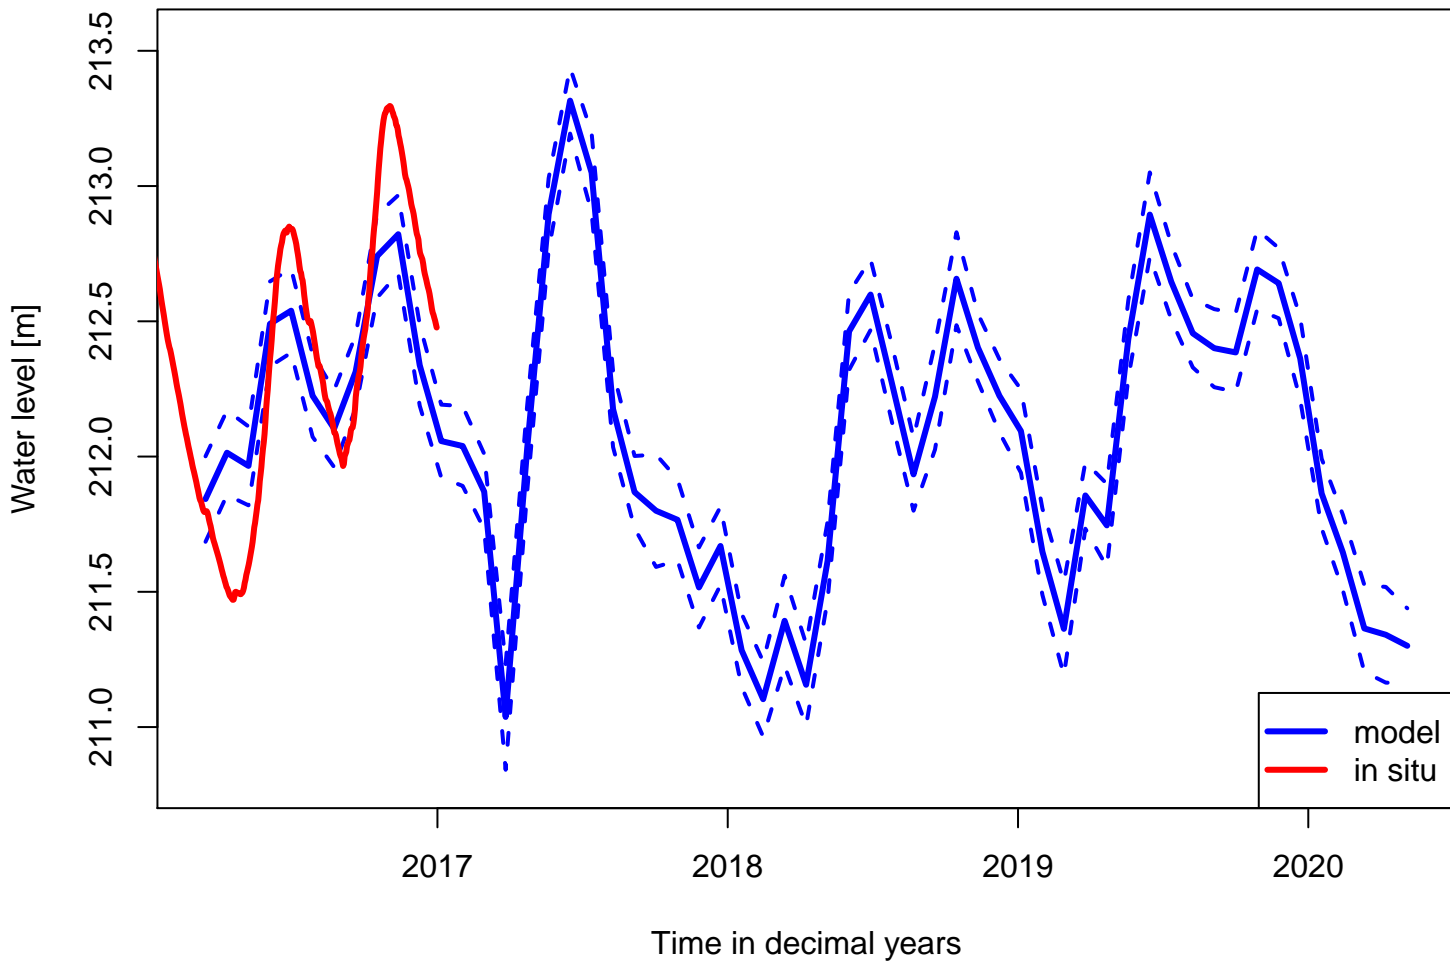

Supplement: s1 [file s1]

**lakename: Melville lakeid: 50 lat: 53.33 lon: -60.19**

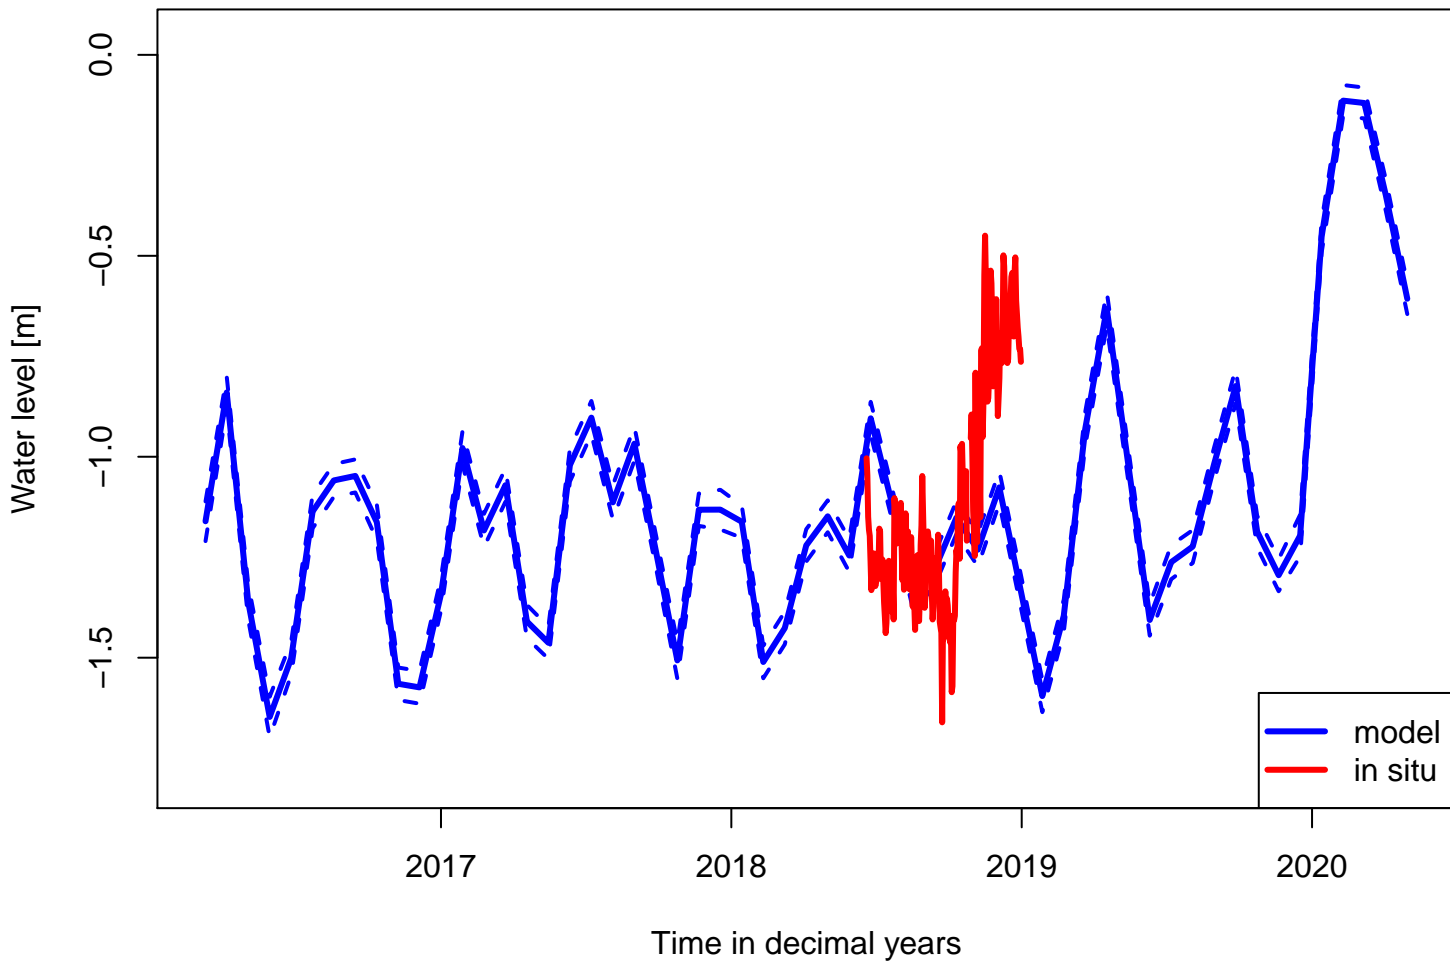

Supplement: s1 [file s1]

**lakename: Atlin lakeid: 419 lat: 59.57 lon: -133.7**

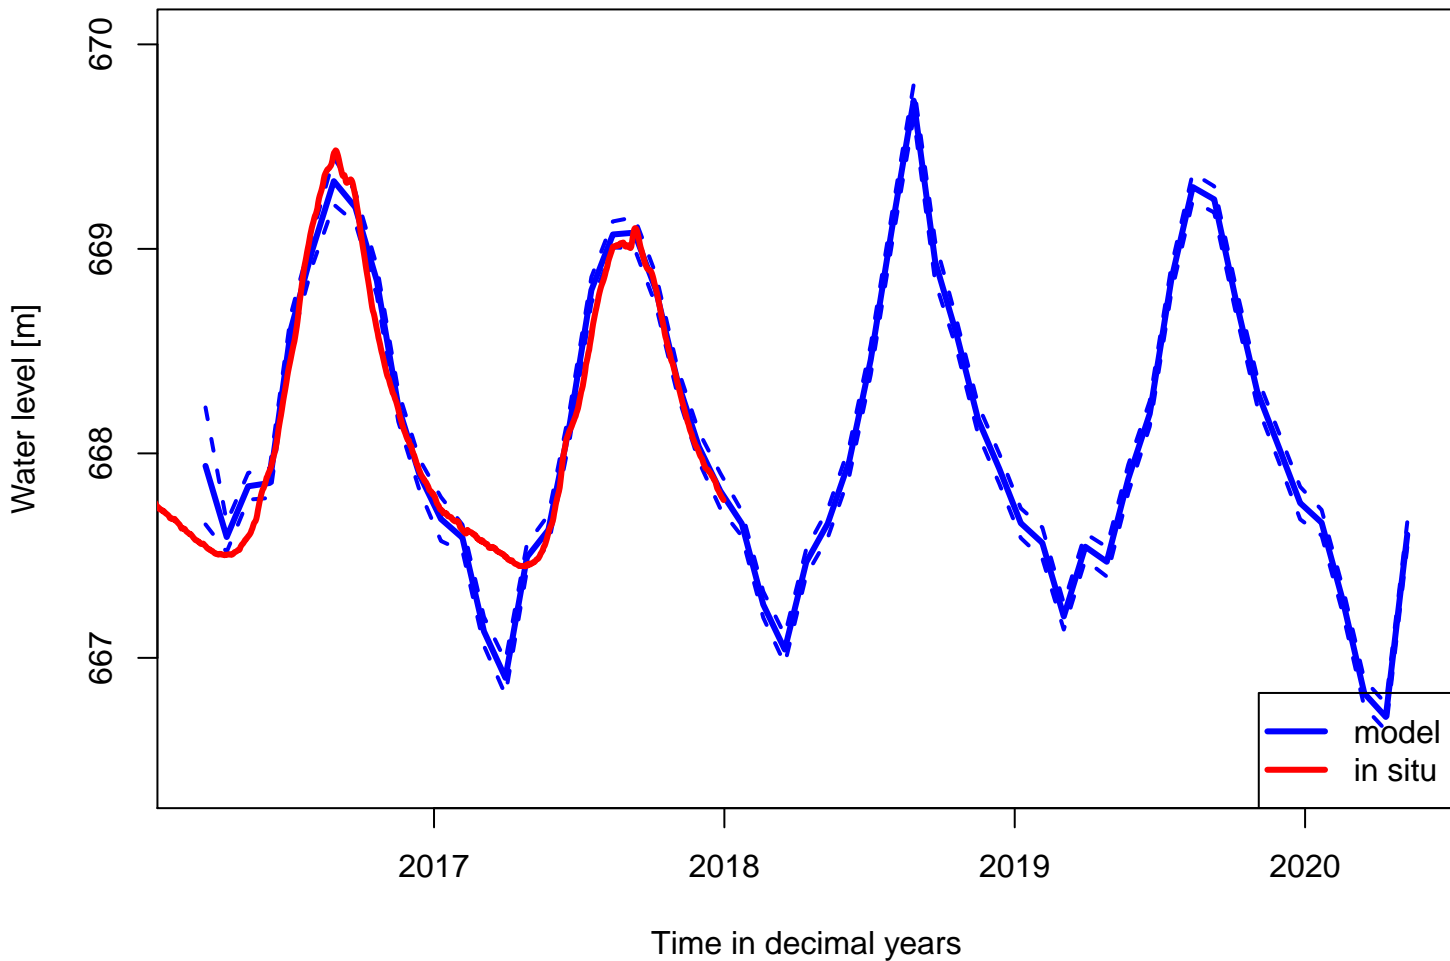

Supplement: s1 [file s1]

**lakename: St. Martin lakeid: 635 lat: 51.51 lon: -98.53**

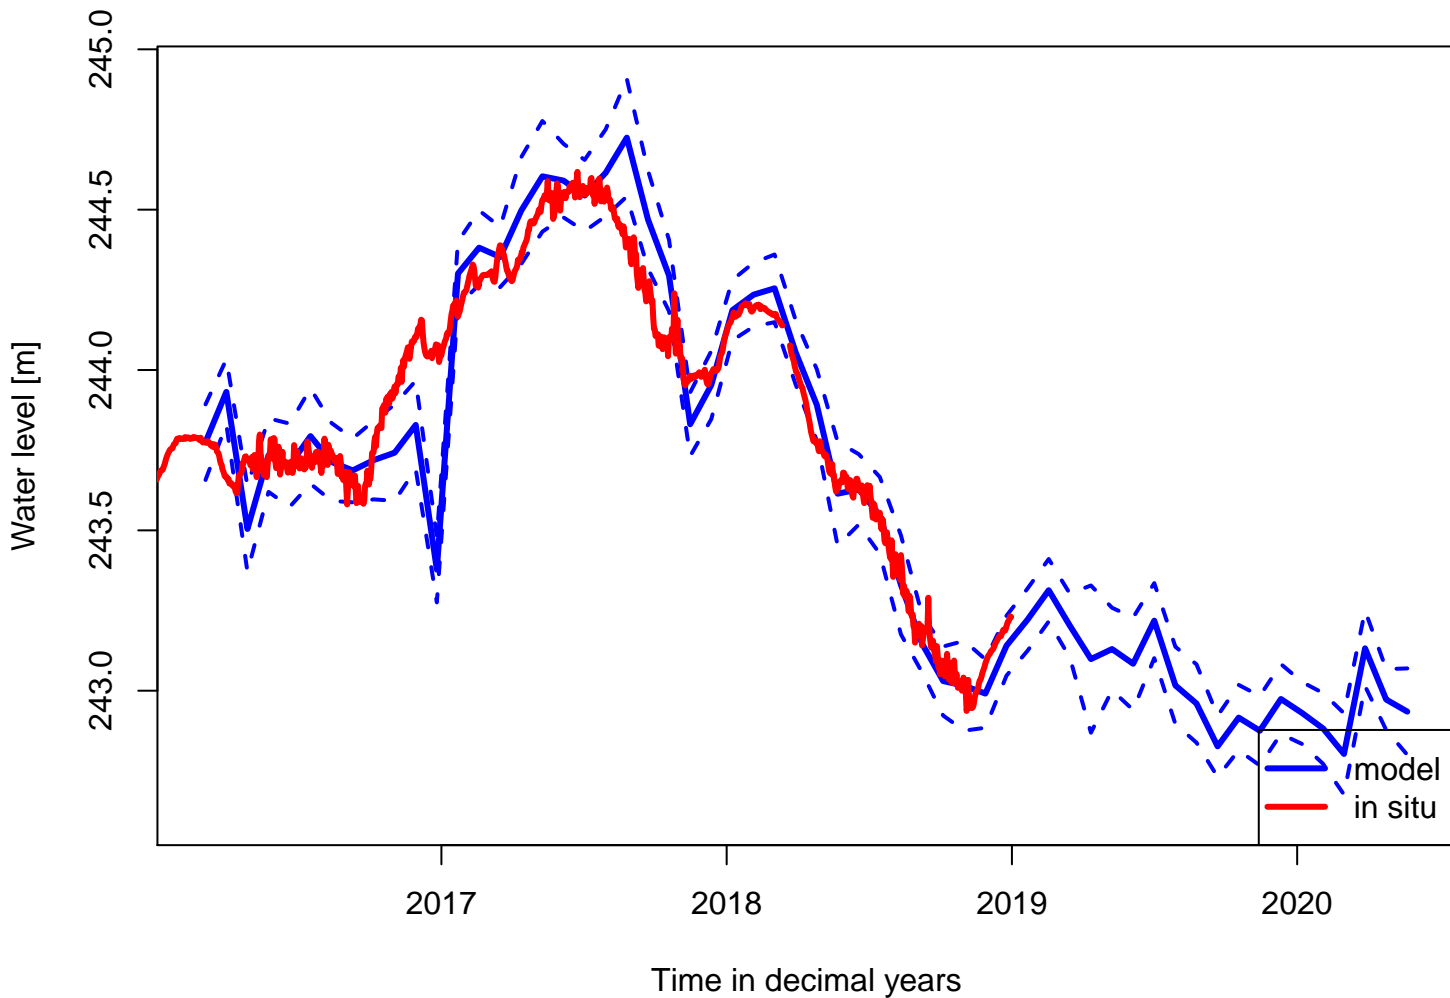

Supplement: s1 [file s1]

**lakename: lakeid: 5886 lat: 56.01 lon: -103.3**

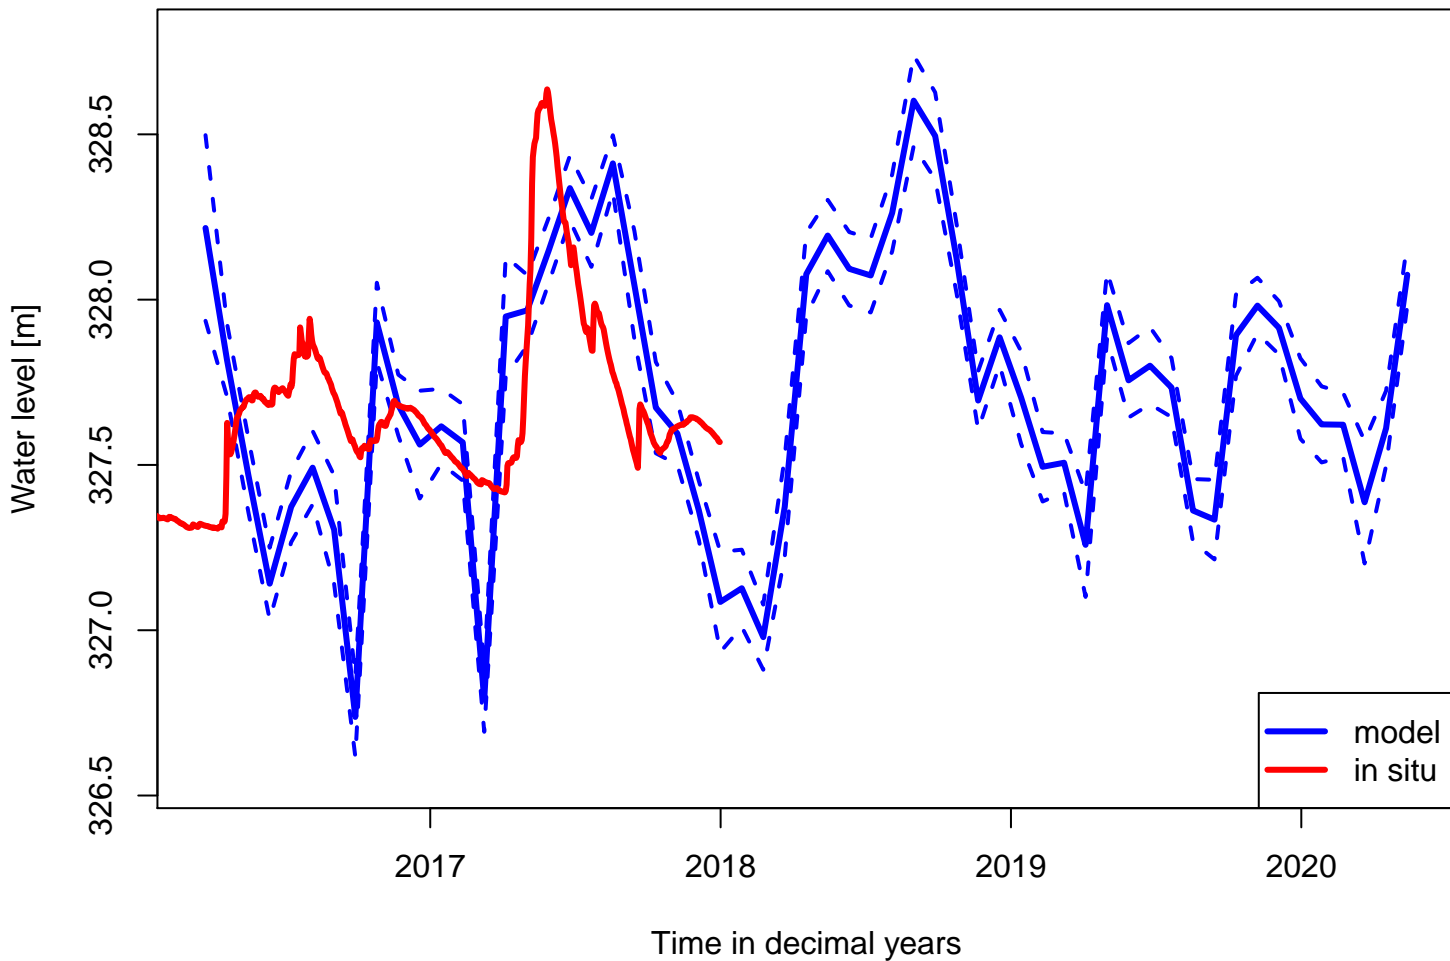

Supplement: s1 [file s1]

**lakename: Champlain lakeid: 64 lat: 44.05 lon: -73.45**

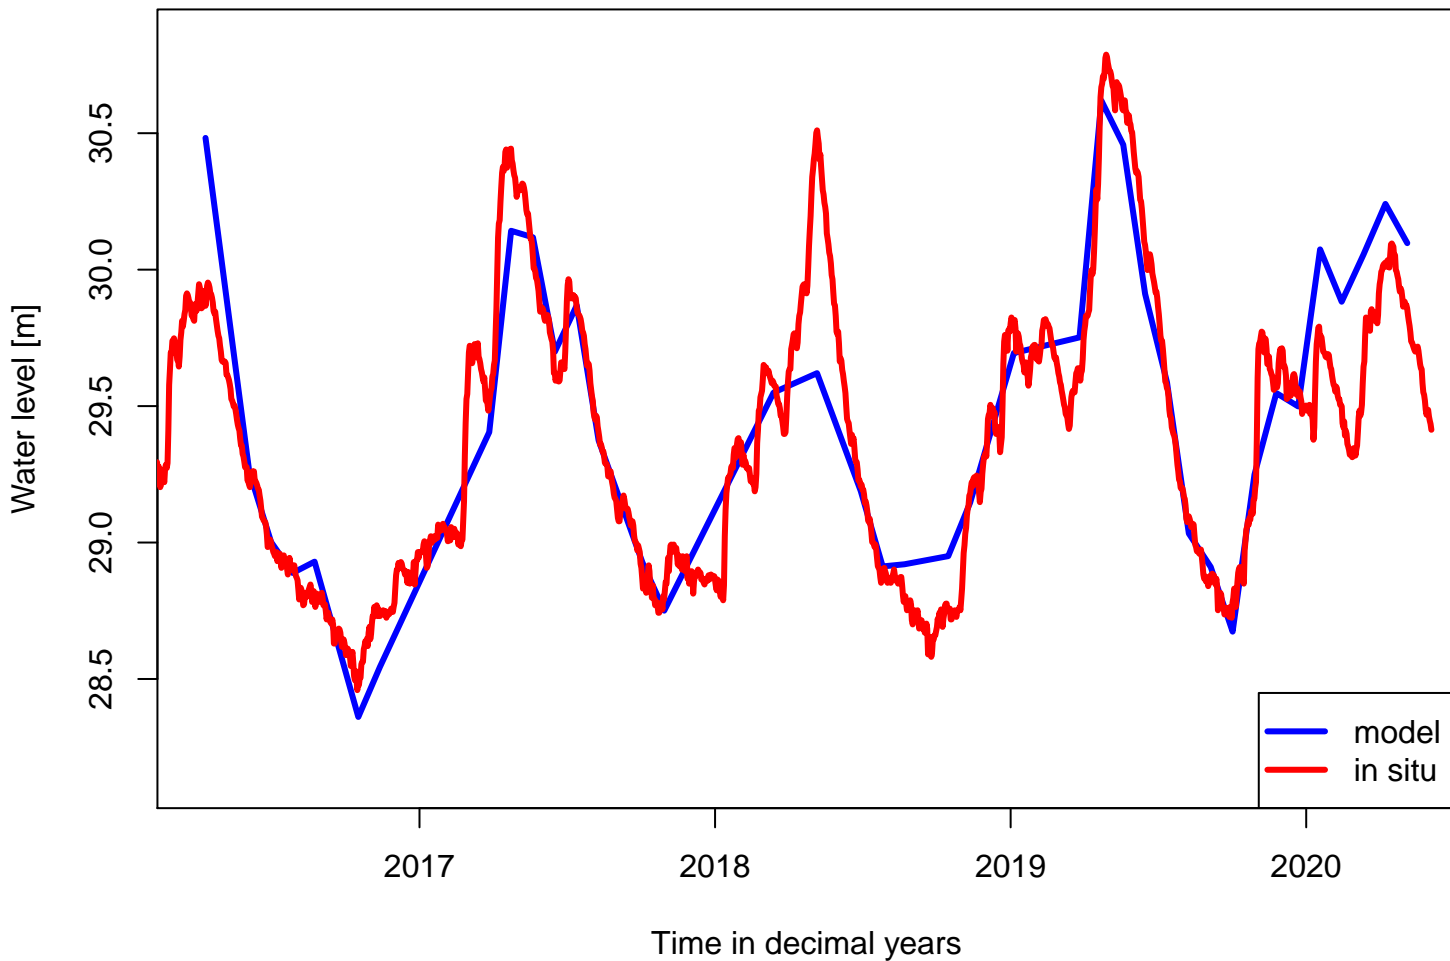

Supplement: s1 [file s1]

**lakename: lakeid: 7936 lat: 49.99 lon: -94.66**

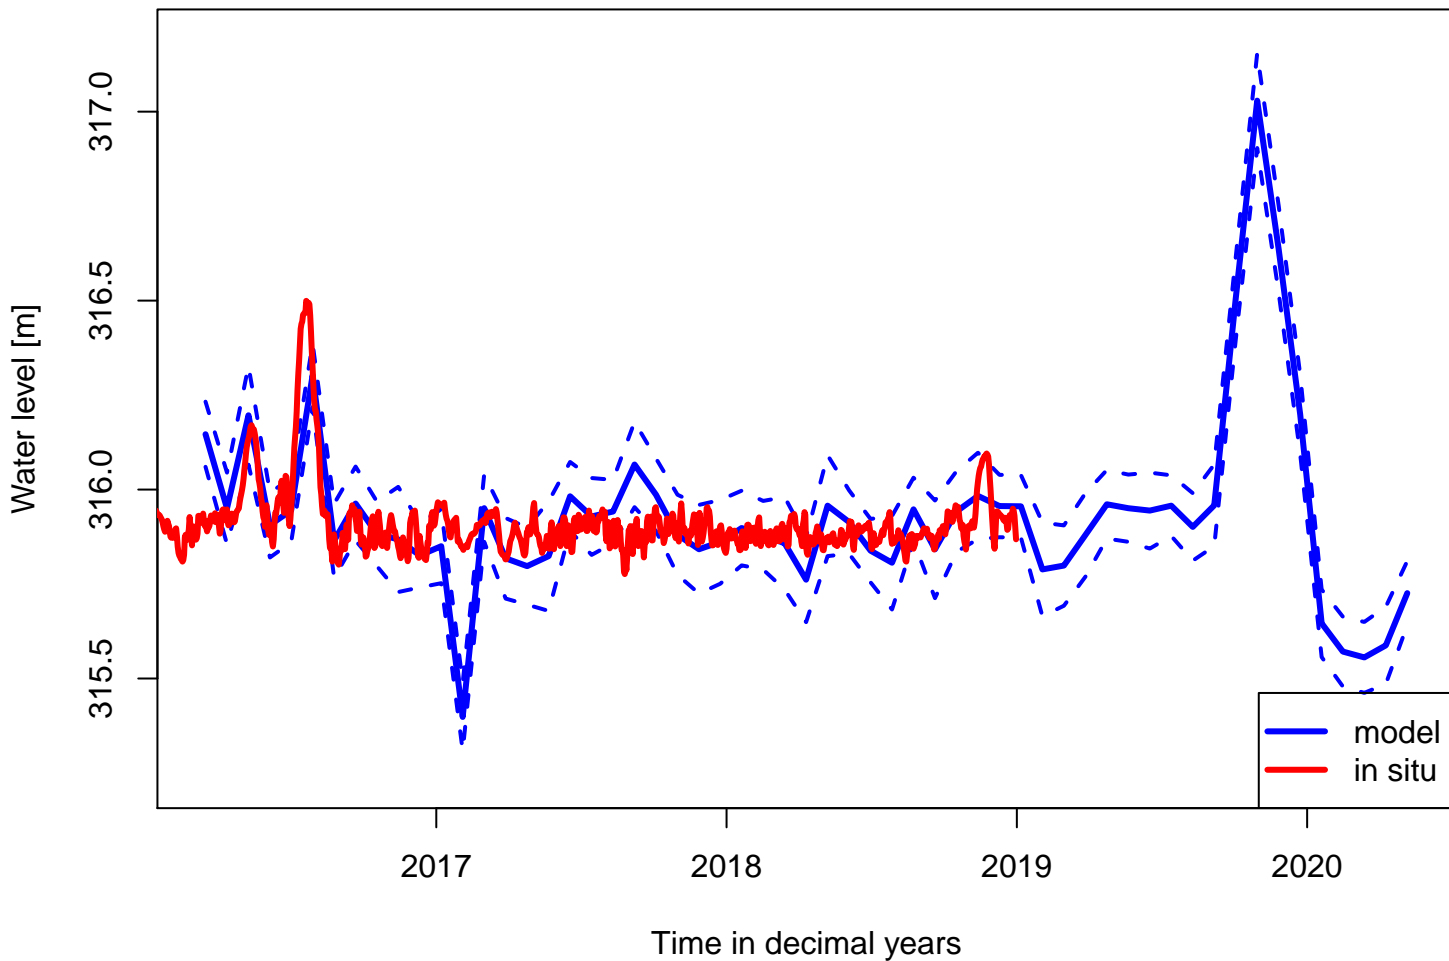

Supplement: s1 [file s1]

**lakename: Lake Moultrie lakeid: 830 lat: 33.4 lon: -80**

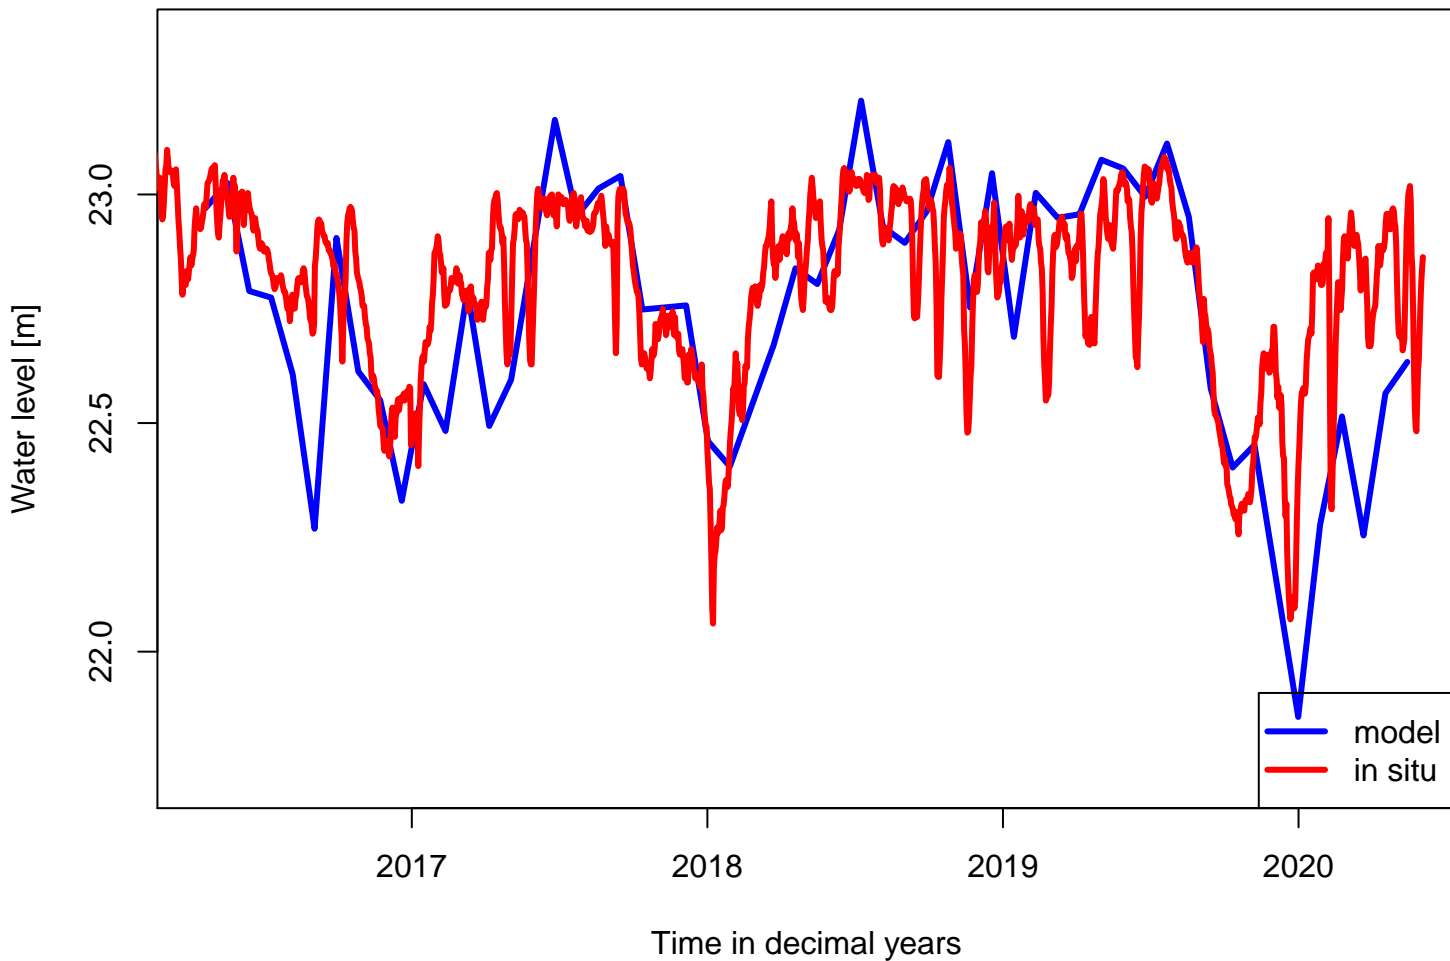

Supplement: s1 [file s1]
