# Supplementary material (part 3 of 5)
Source: MDPI journal article supplement (https://www.mdpi.com/2072-4292/12/17/2835)

**lakename: Chautauqua Lake lakeid: 9129 lat: 42.16 lon: -79.39**

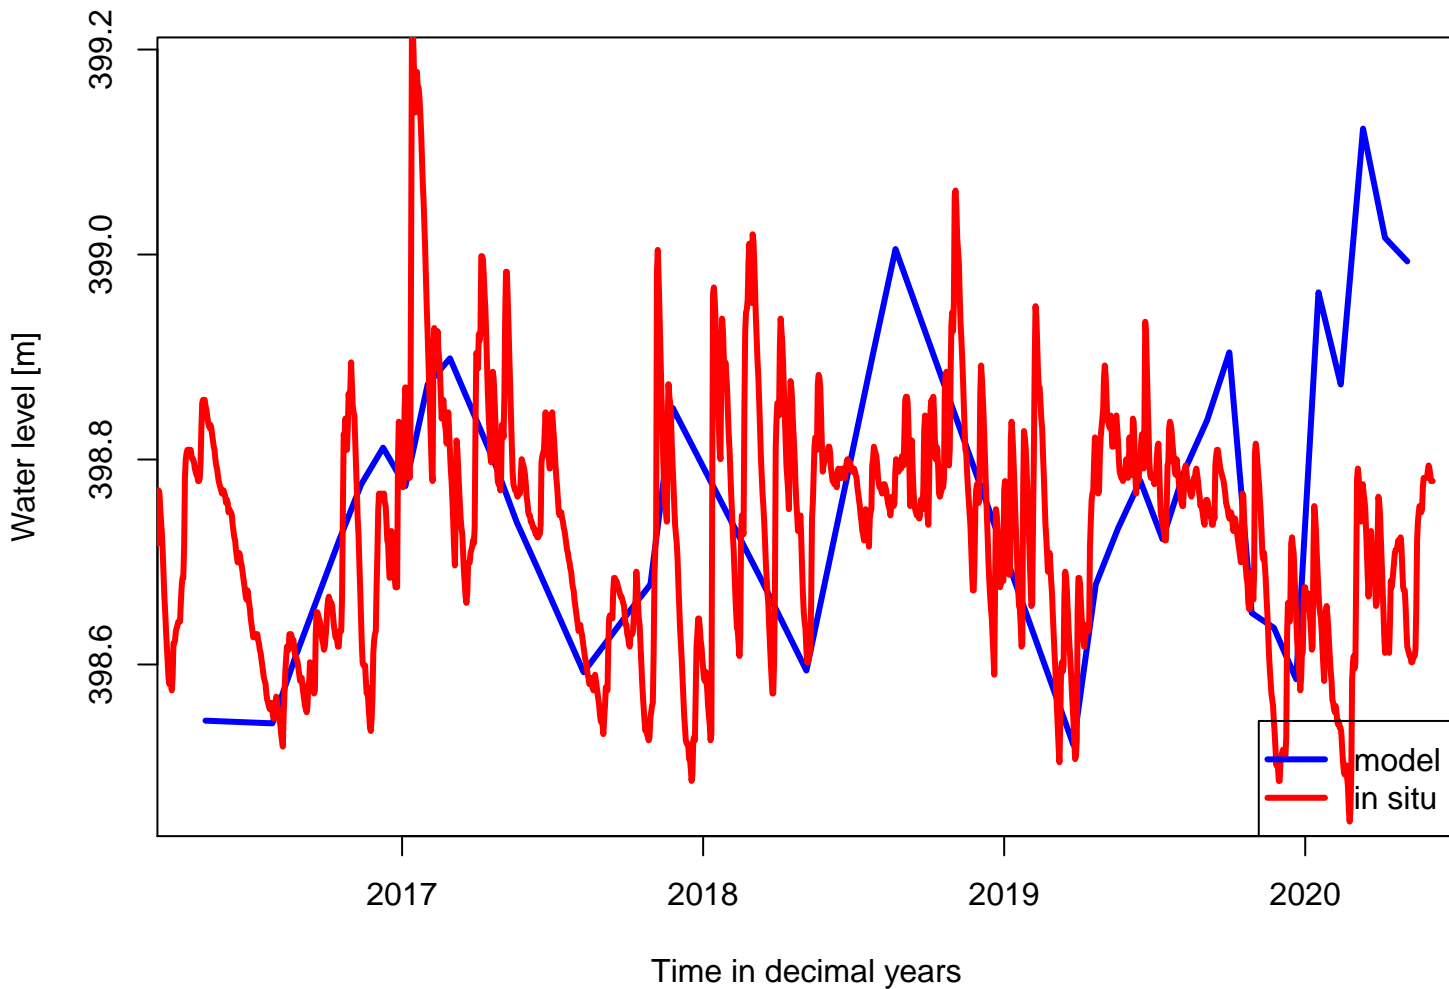

Supplement: s1 [file s1]

**lakename: Southern Indian lakeid: 37 lat: 56.69 lon: -99.02**

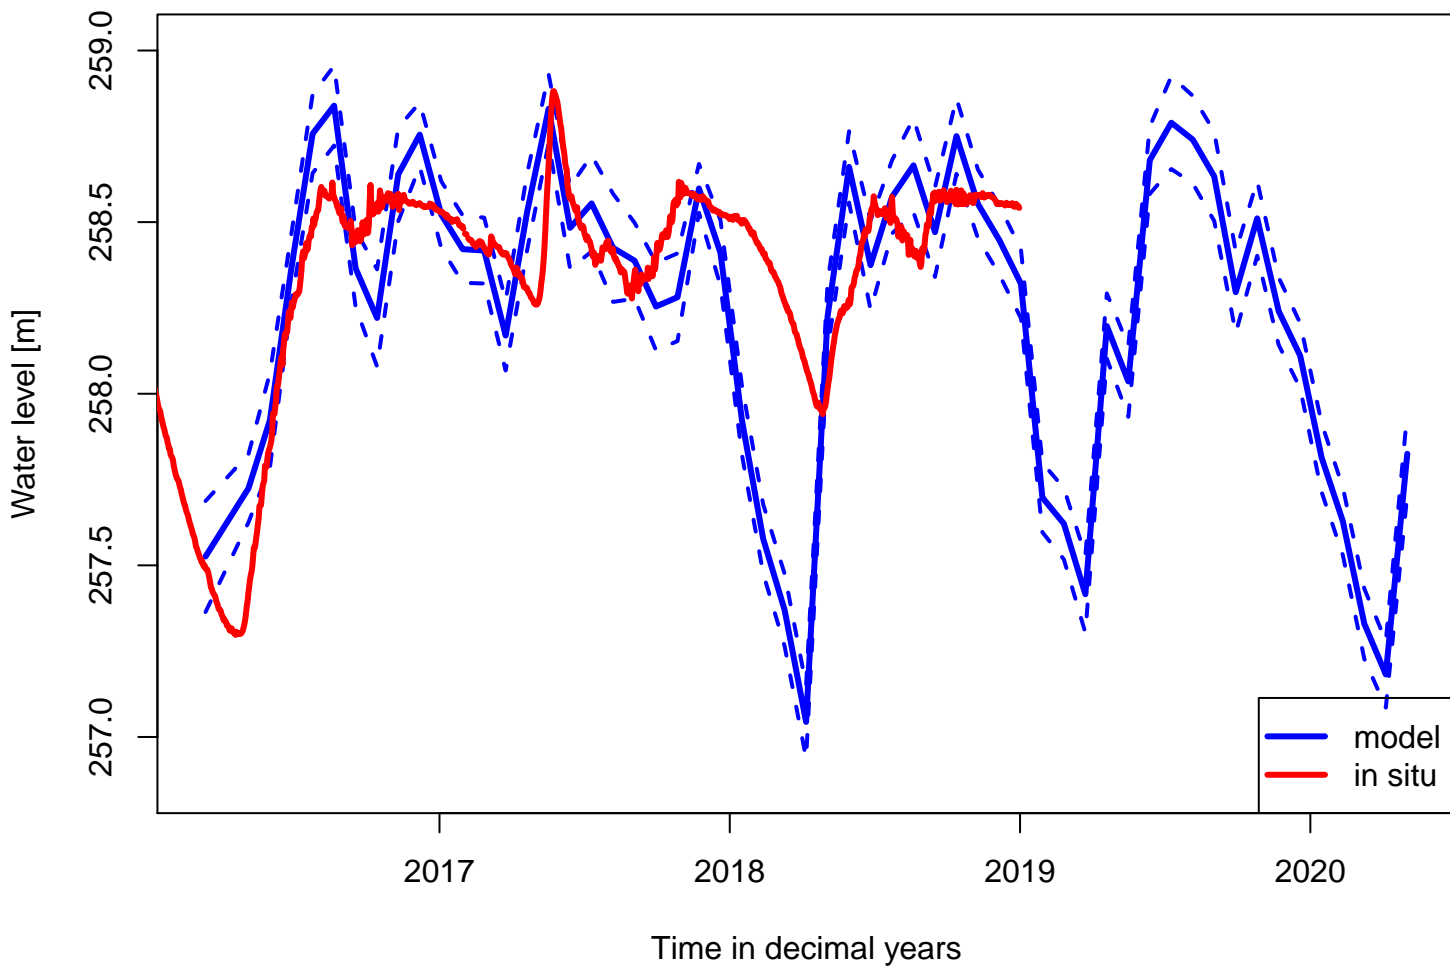

Supplement: s1 [file s1]

**lakename: Okanagan lakeid: 695 lat: 49.89 lon: -119.5**

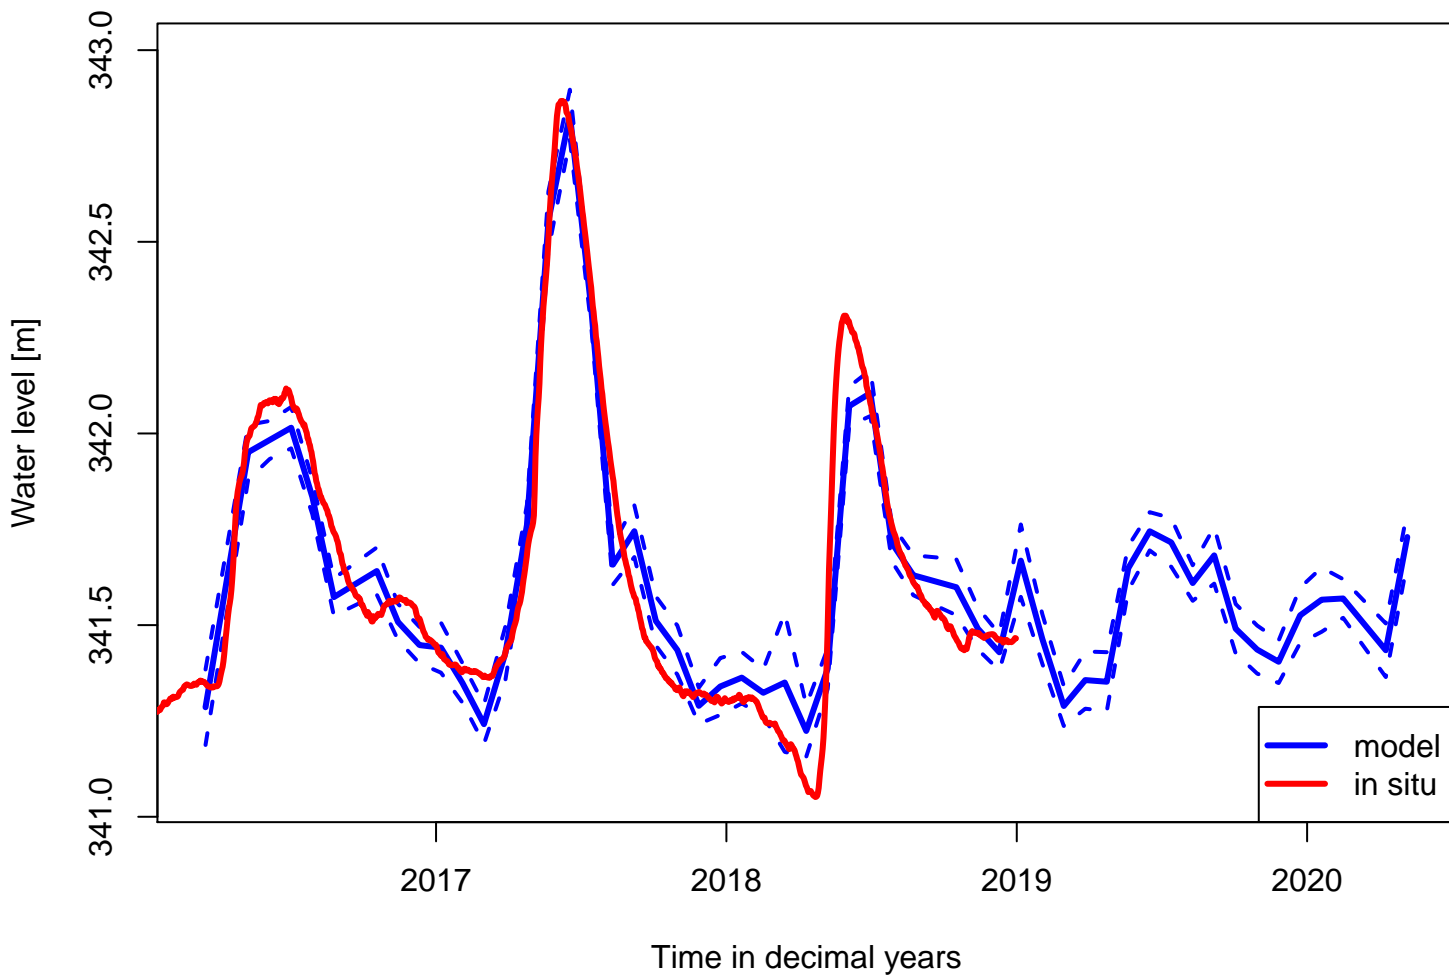

Supplement: s1 [file s1]

**lakename: Cedar lakeid: 51 lat: 53.32 lon: -100.3**

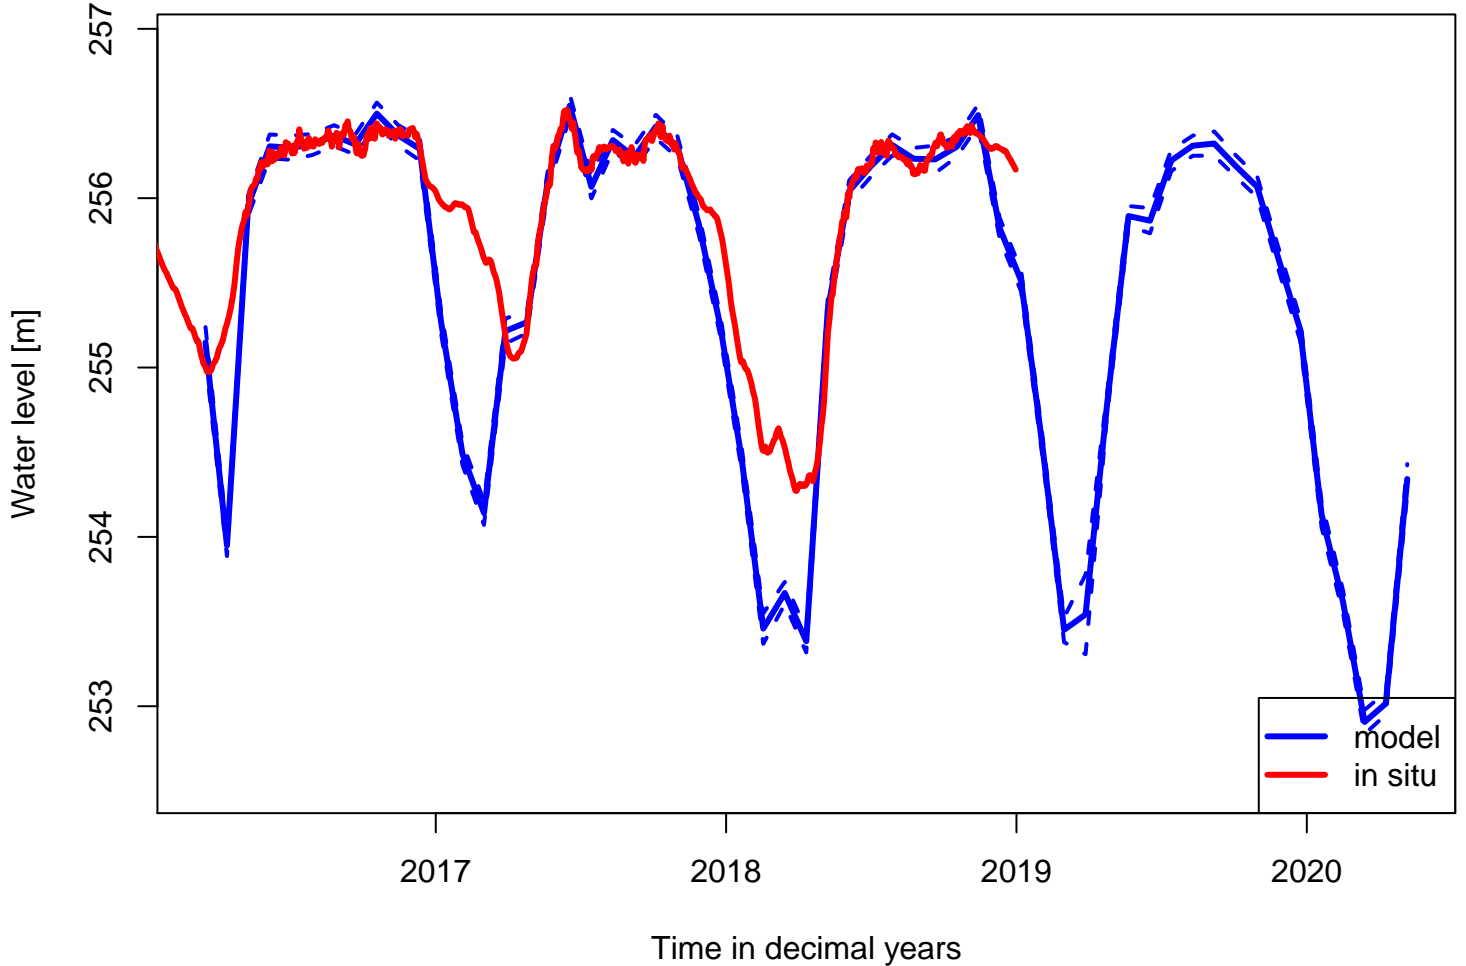

Supplement: s1 [file s1]

**lakename: Tazin lakeid: 412 lat: 59.82 lon: -109.4**

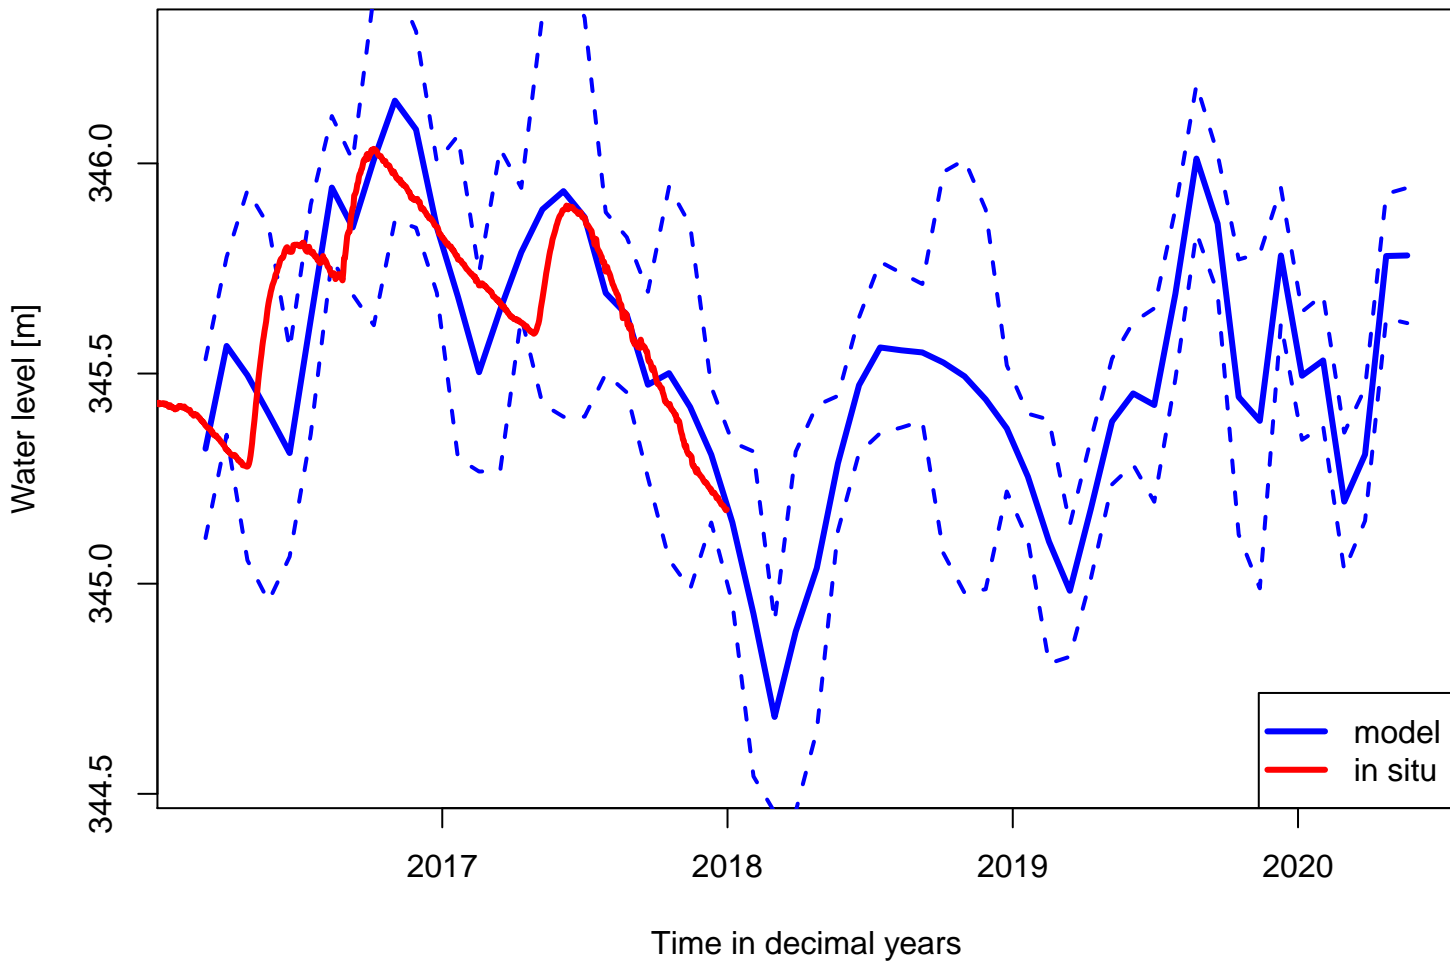

Supplement: s1 [file s1]

**lakename: Melville lakeid: 50 lat: 53.33 lon: -60.19**

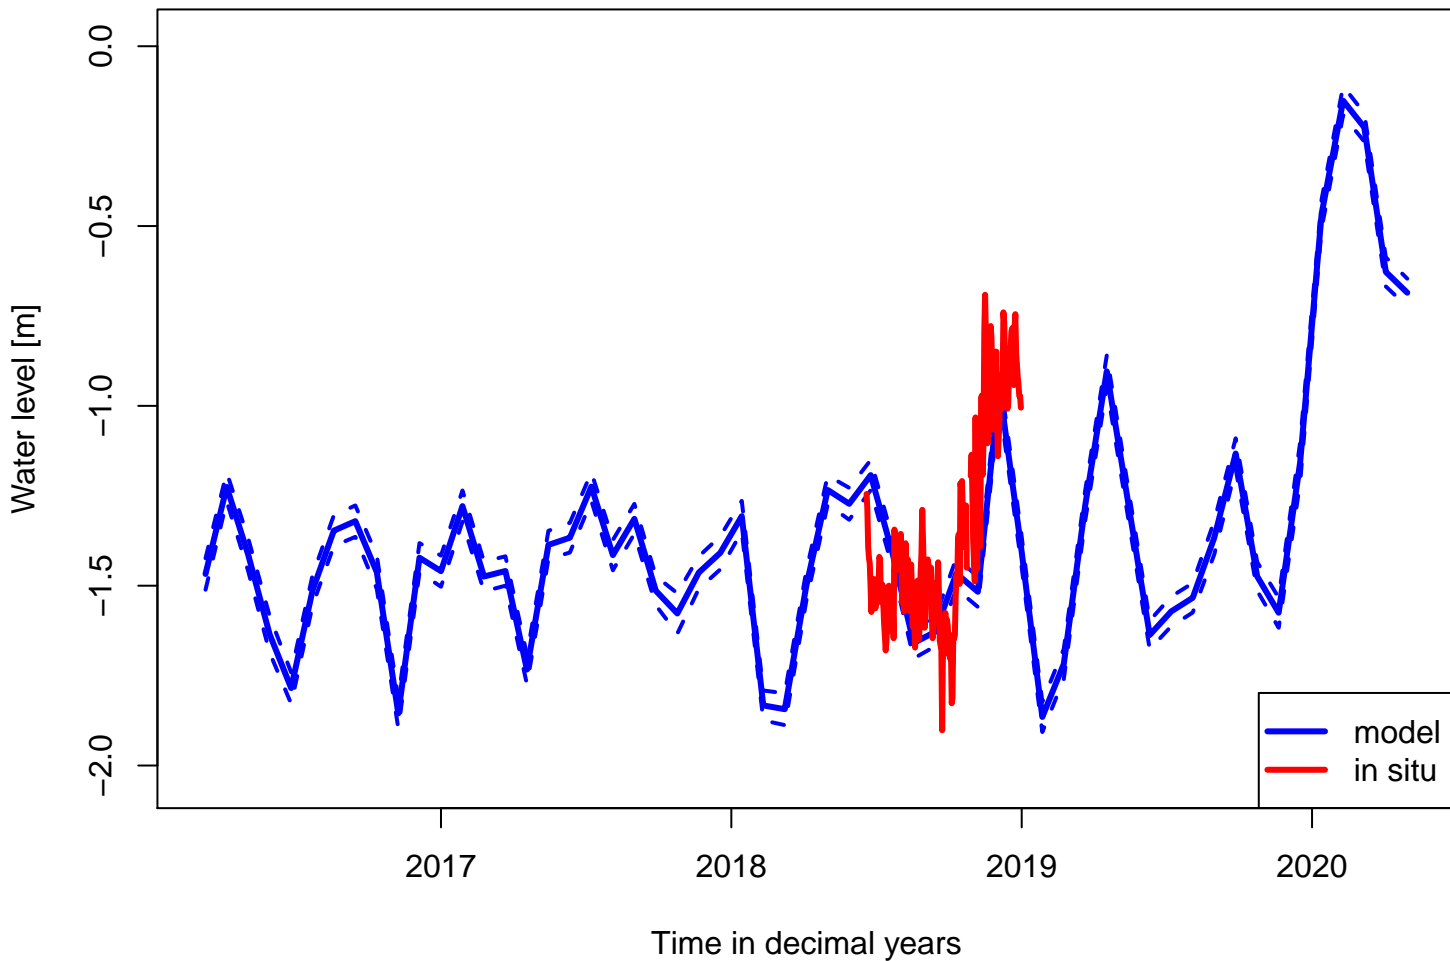

Supplement: s1 [file s1]

**lakename: lakeid: 8707 lat: 46.27 lon: -81.34**

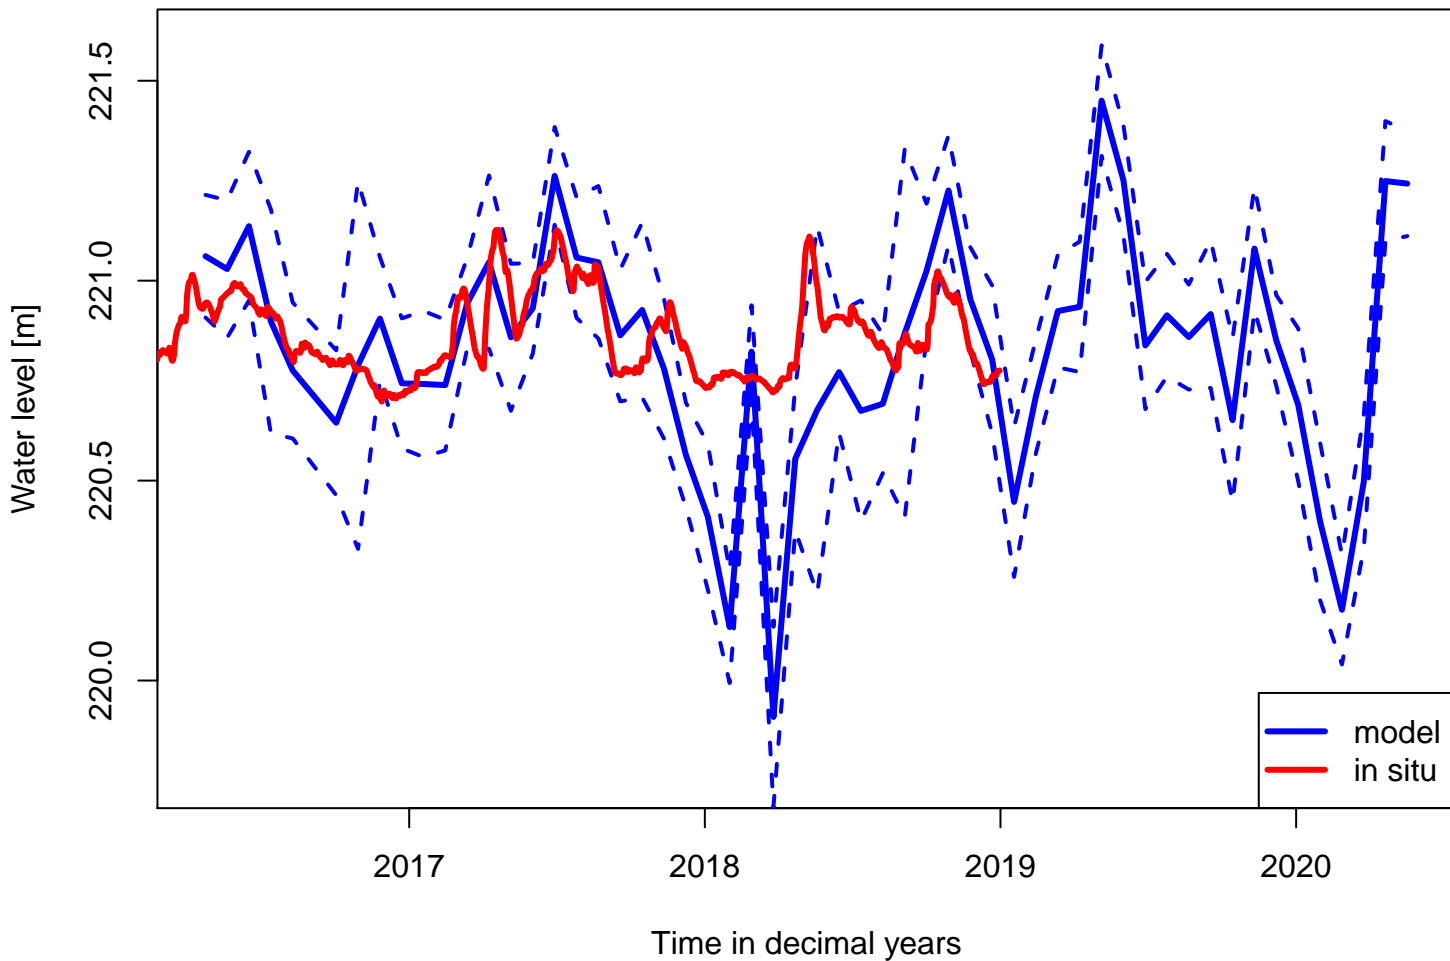

Supplement: s1 [file s1]

**lakename: Dauphin lakeid: 641 lat: 51.44 lon: -99.95**

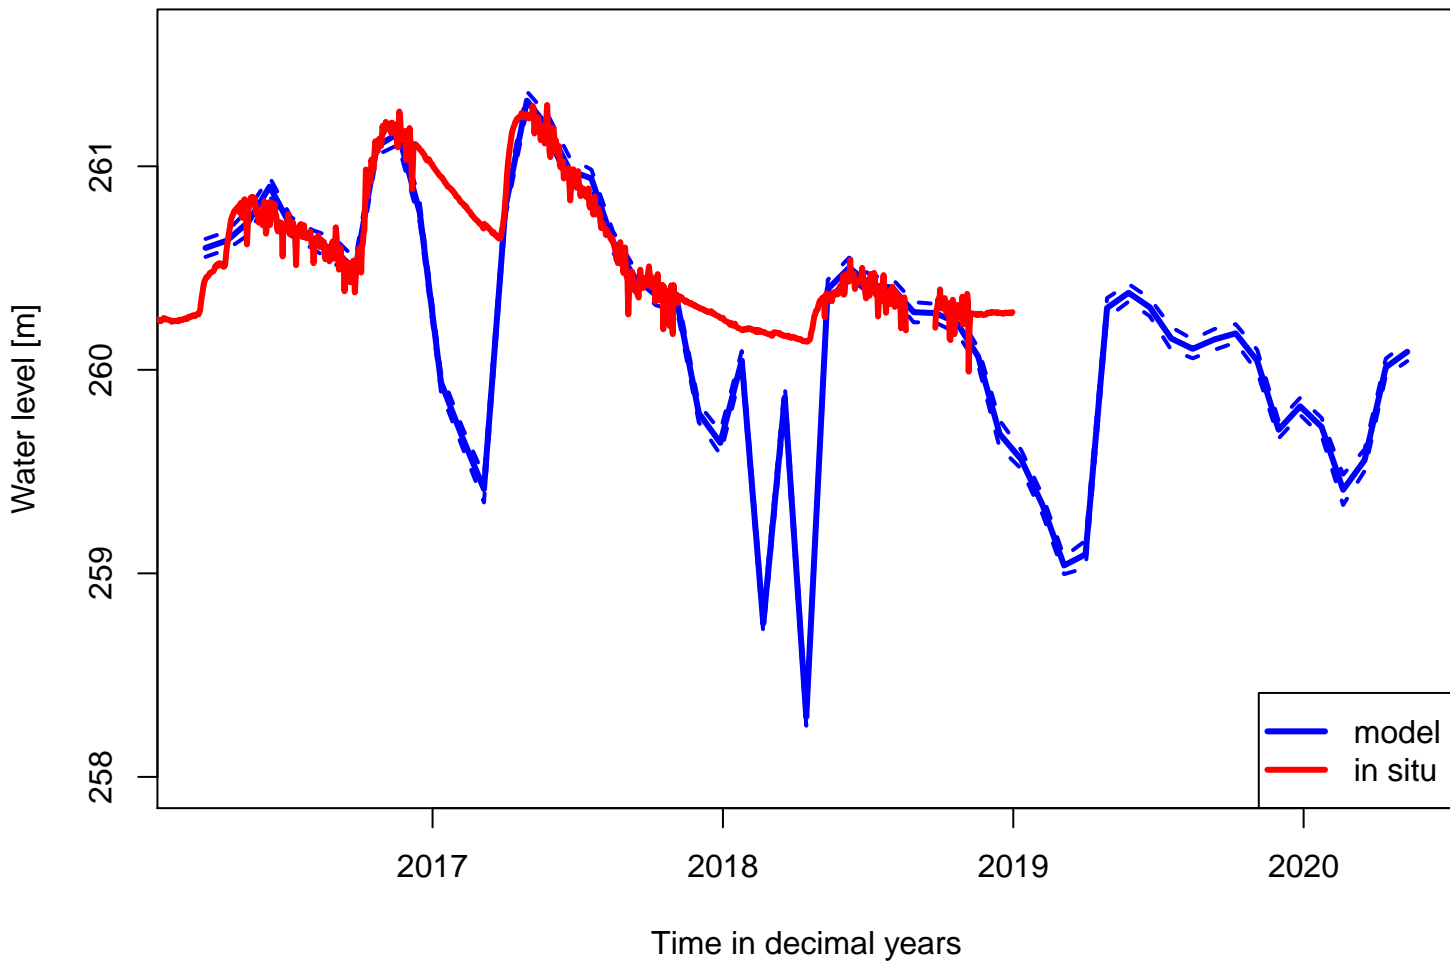

Supplement: s1 [file s1]

**lakename: Kiskitto lakeid: 564 lat: 54.3 lon: -98.44**

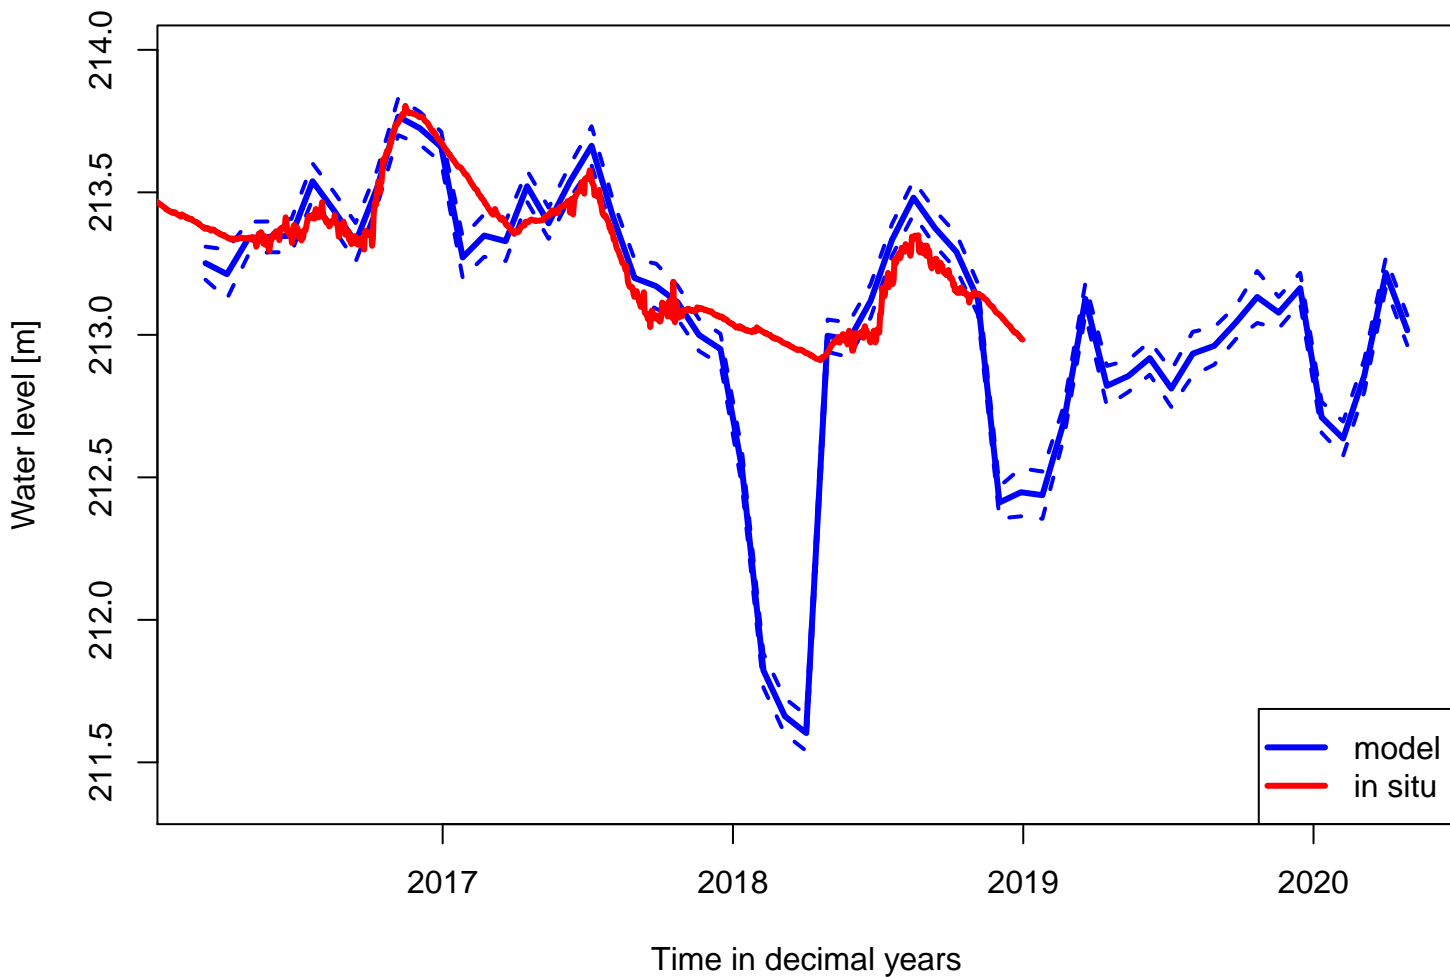

Supplement: s1 [file s1]

**lakename: Lake Texoma lakeid: 825 lat: 33.82 lon: -96.57**

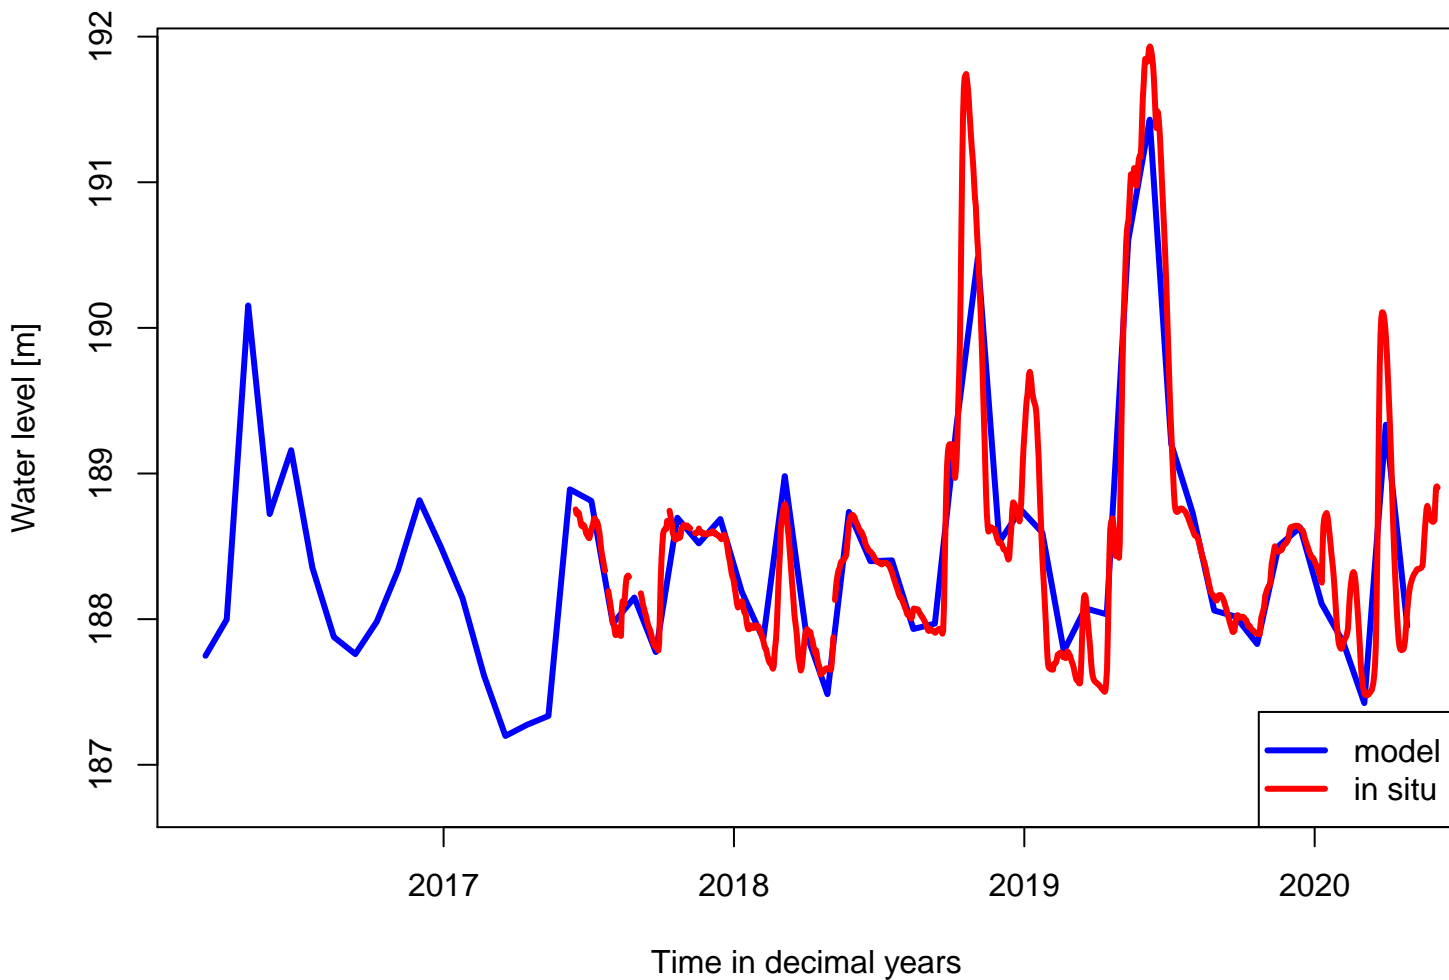

Supplement: s1 [file s1]

**lakename: Lesser Slave lakeid: 42 lat: 55.31 lon: -114.8**

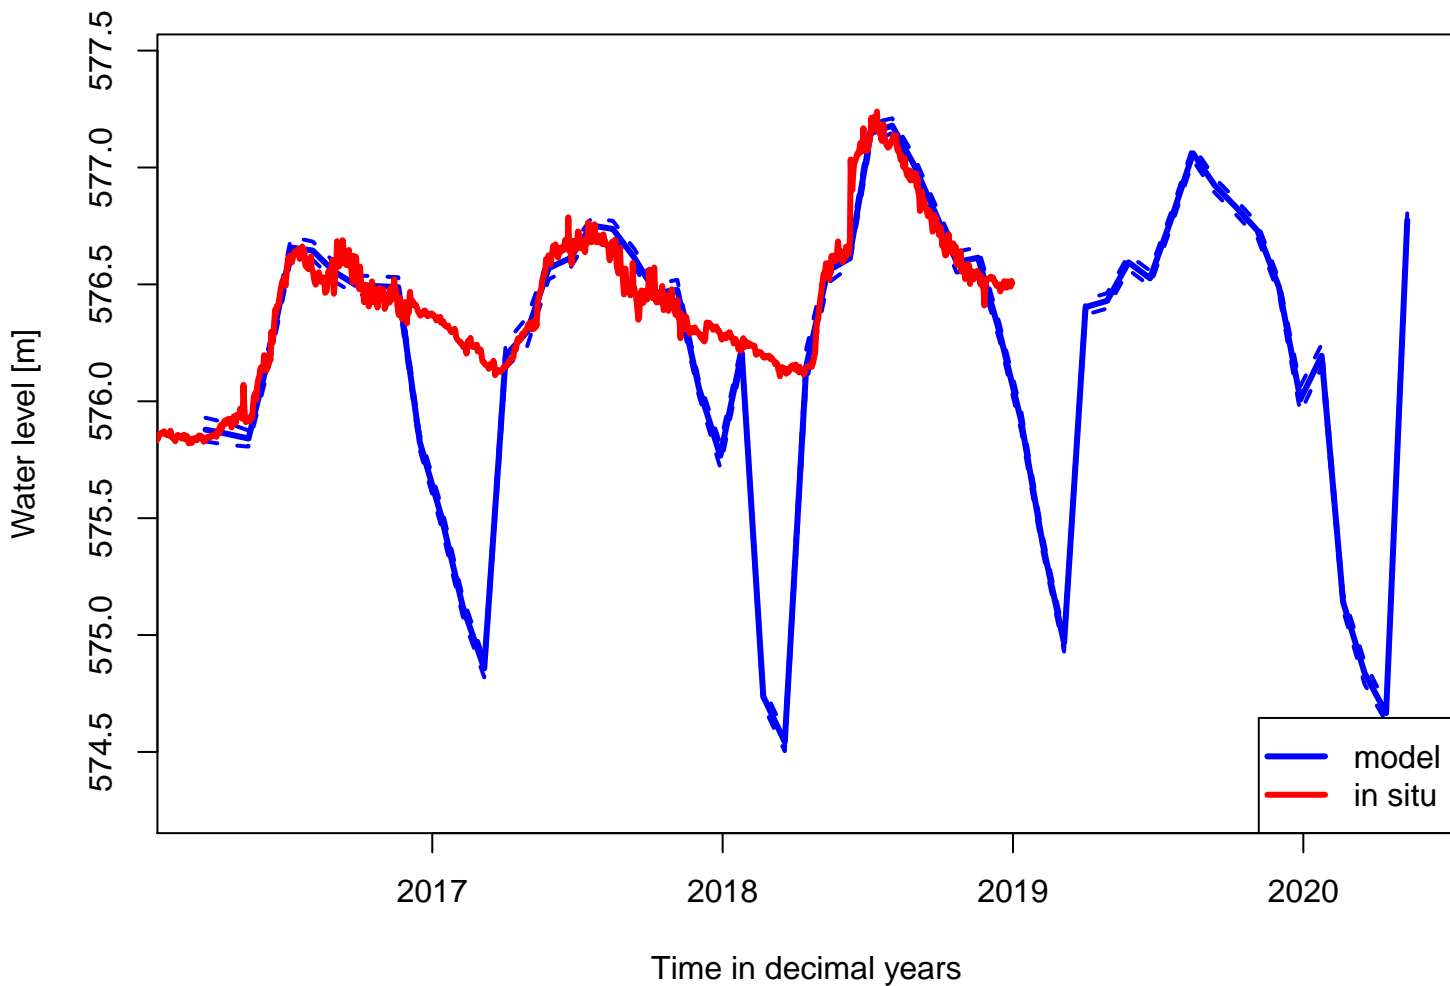

Supplement: s1 [file s1]

**lakename: Nonacho lakeid: 359 lat: 61.73 lon: -109.7**

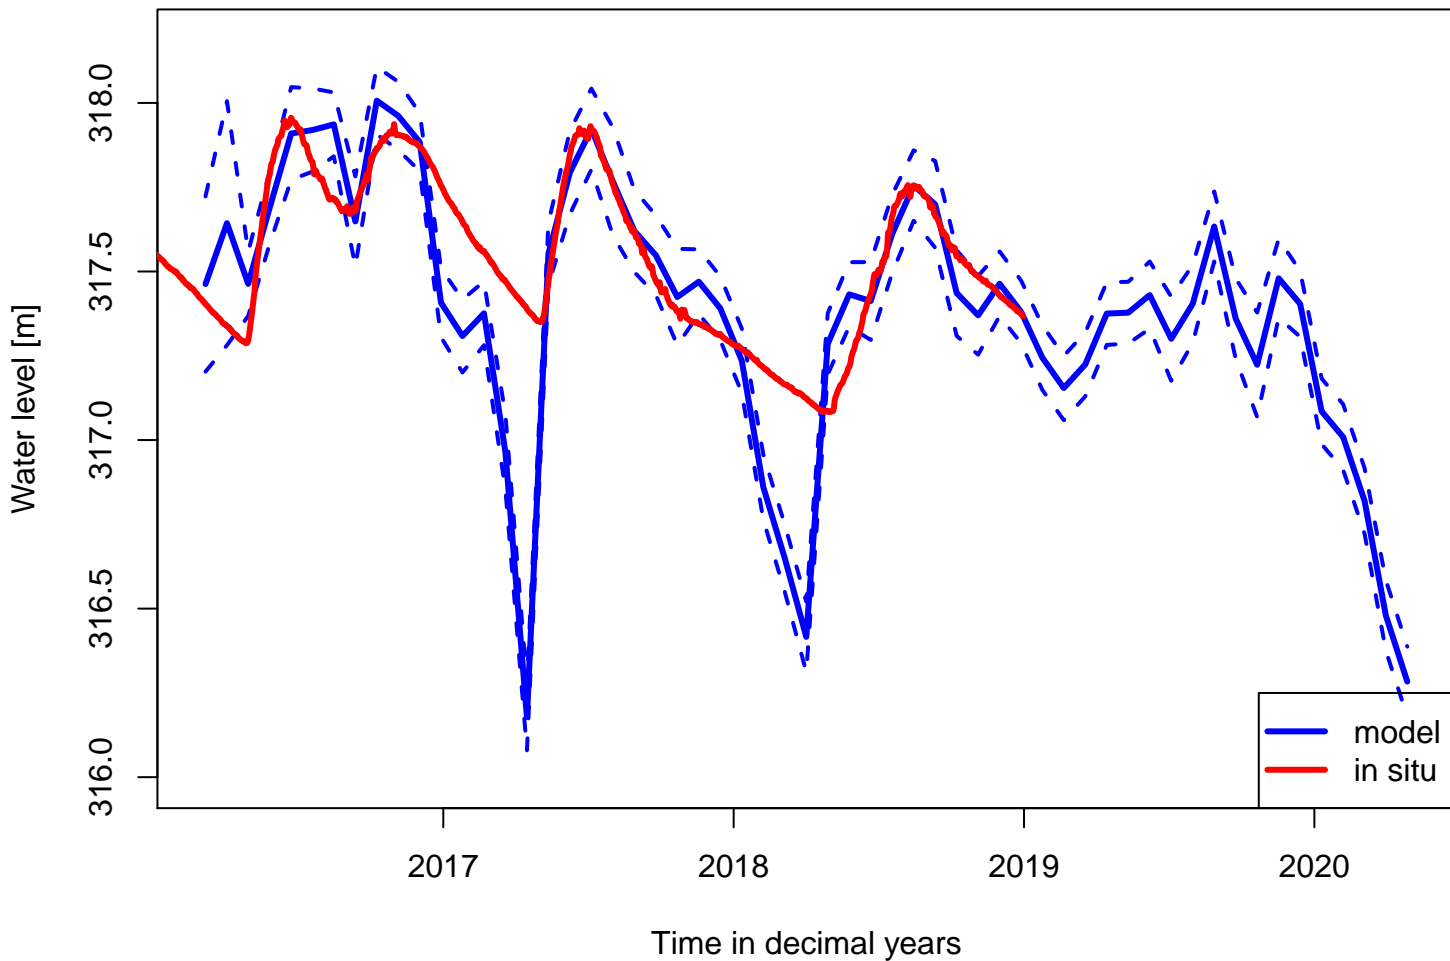

Supplement: s1 [file s1]

**lakename: Manitoba lakeid: 53 lat: 51.44 lon: -98.8**

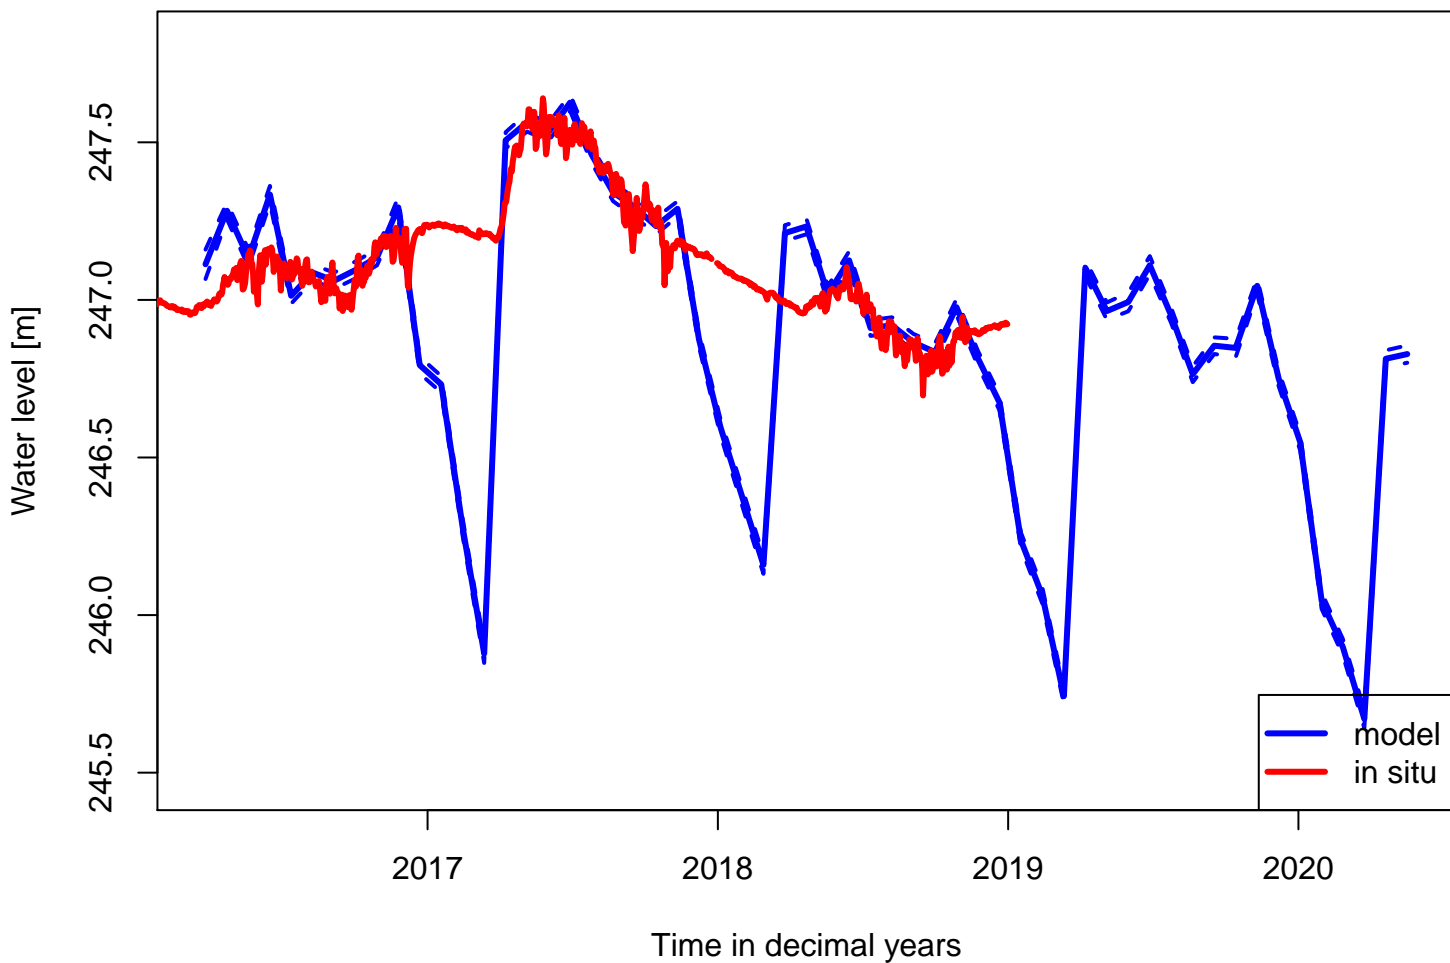

Supplement: s1 [file s1]

**lakename: Contwoyto lakeid: 22 lat: 65.78 lon: -111.2**

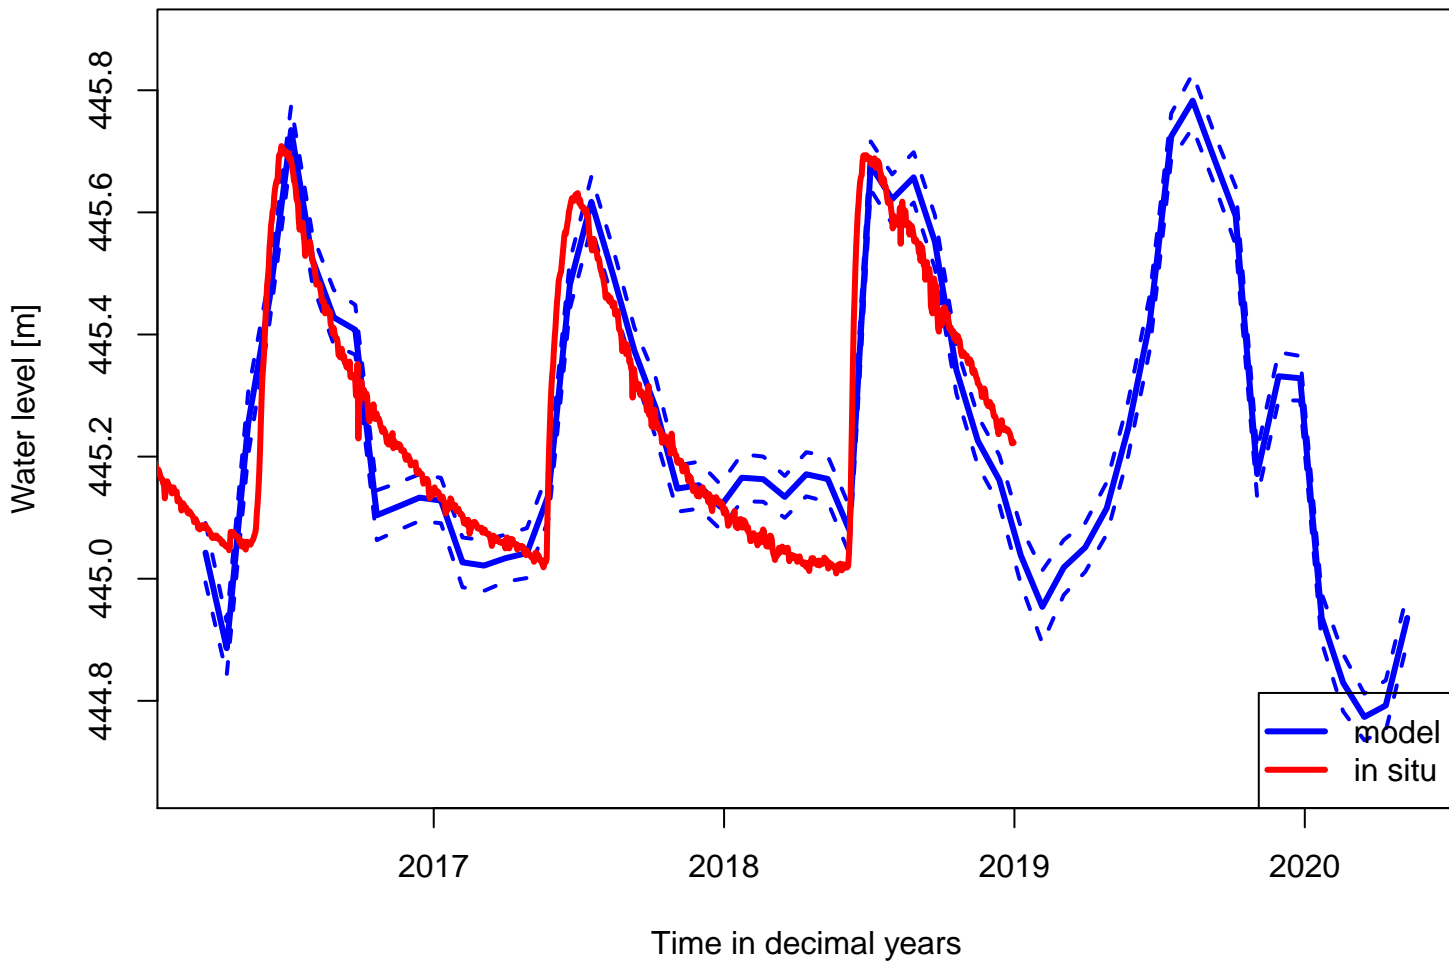

Supplement: s1 [file s1]

**lakename: Cold lakeid: 551 lat: 54.47 lon: -110.2**

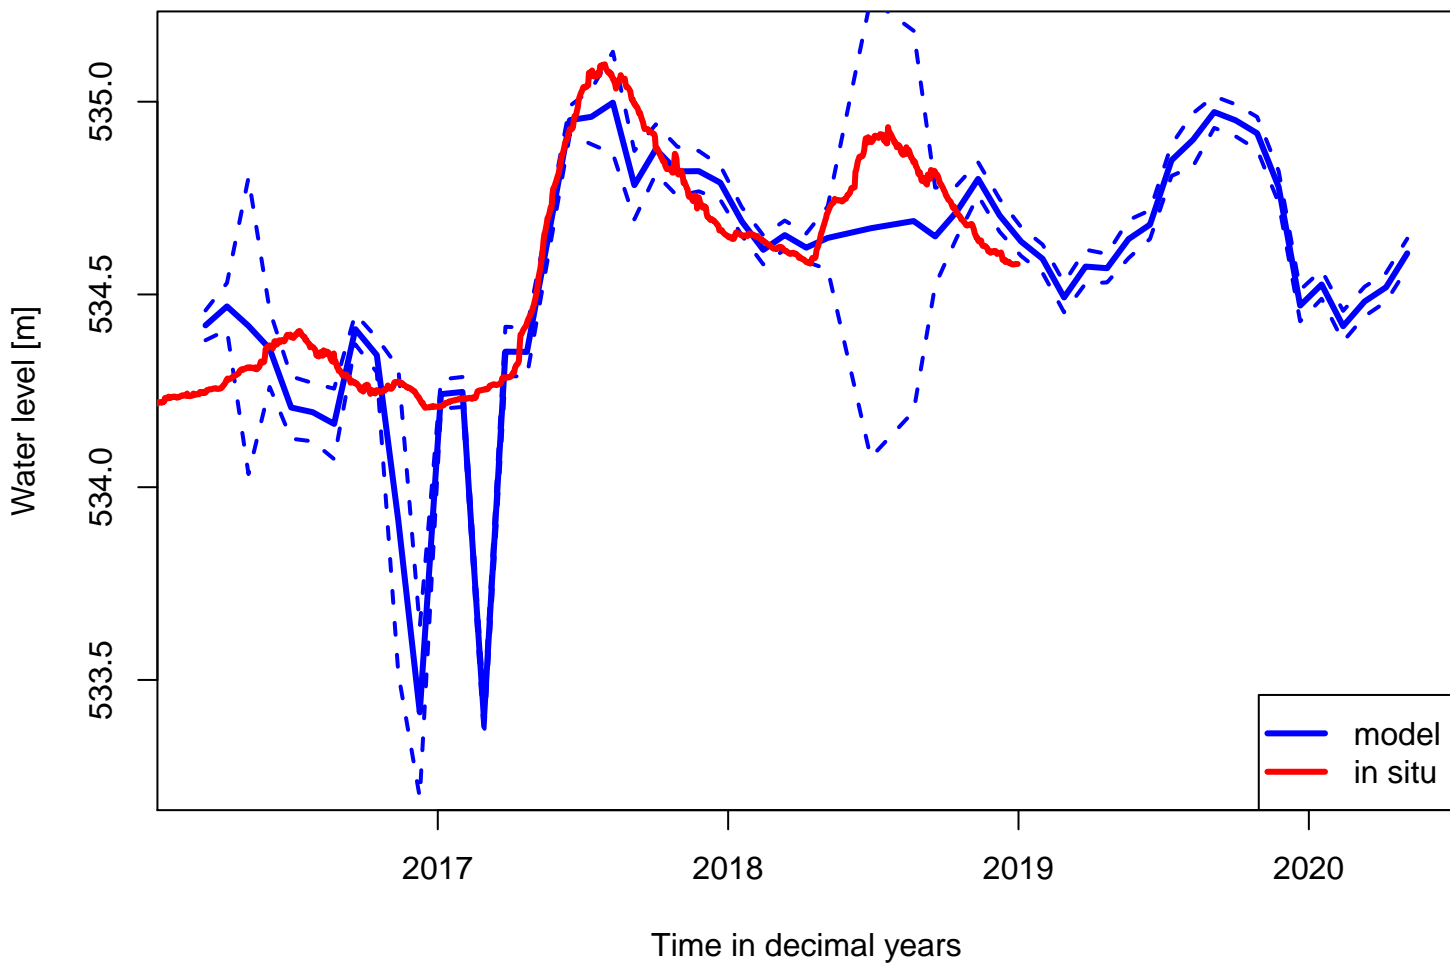

Supplement: s1 [file s1]

**lakename: Cedar lakeid: 51 lat: 53.32 lon: -100.3**

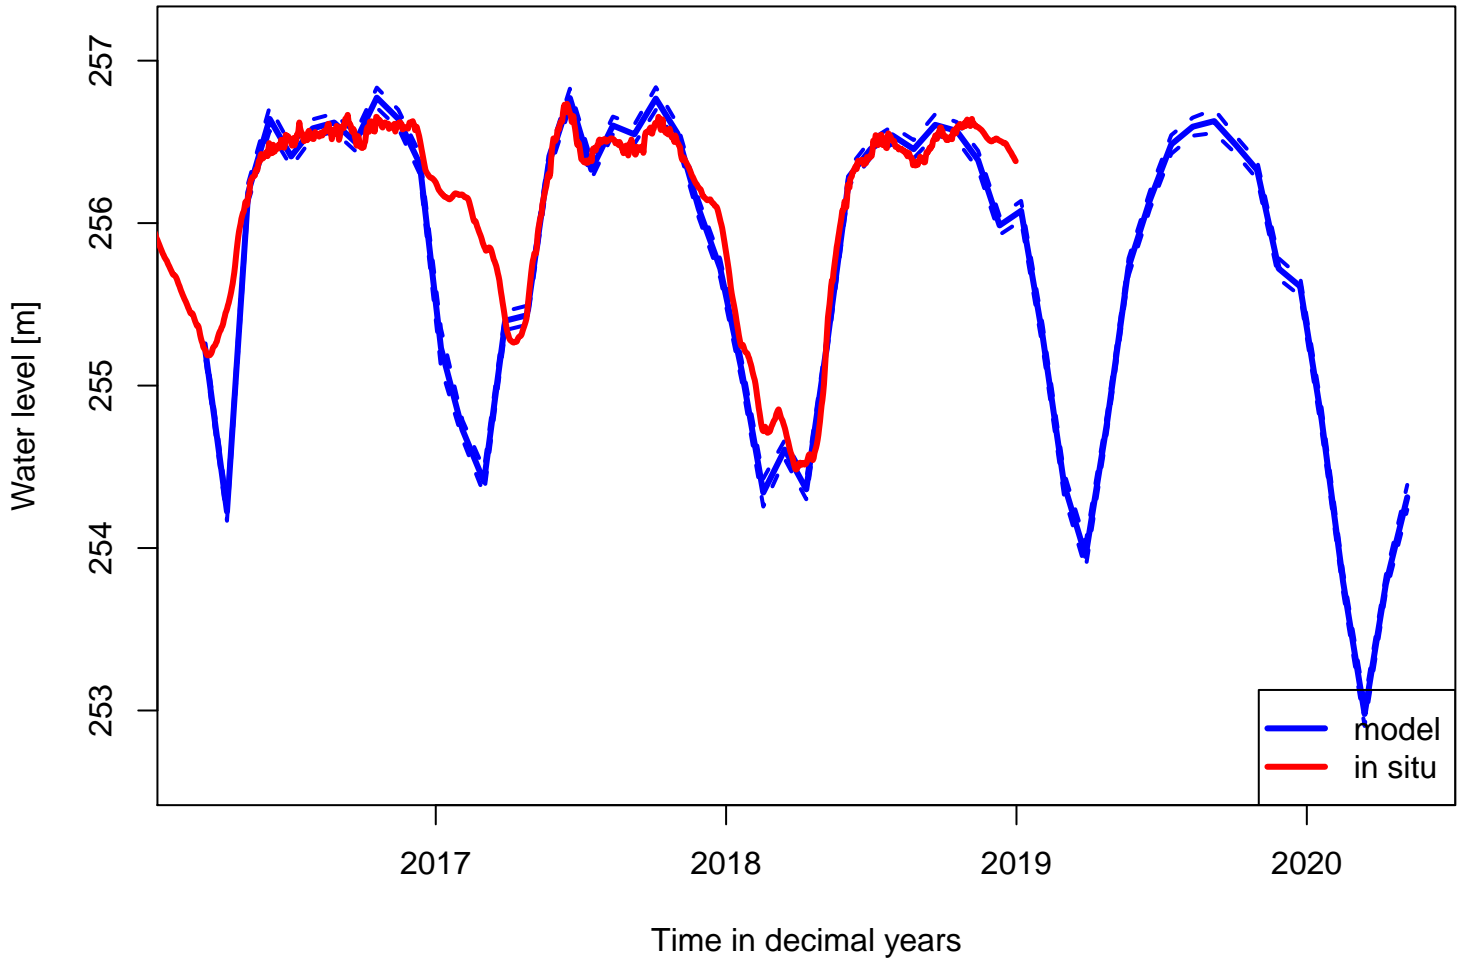

Supplement: s1 [file s1]

**lakename: Point lakeid: 278 lat: 65.4 lon: -114**

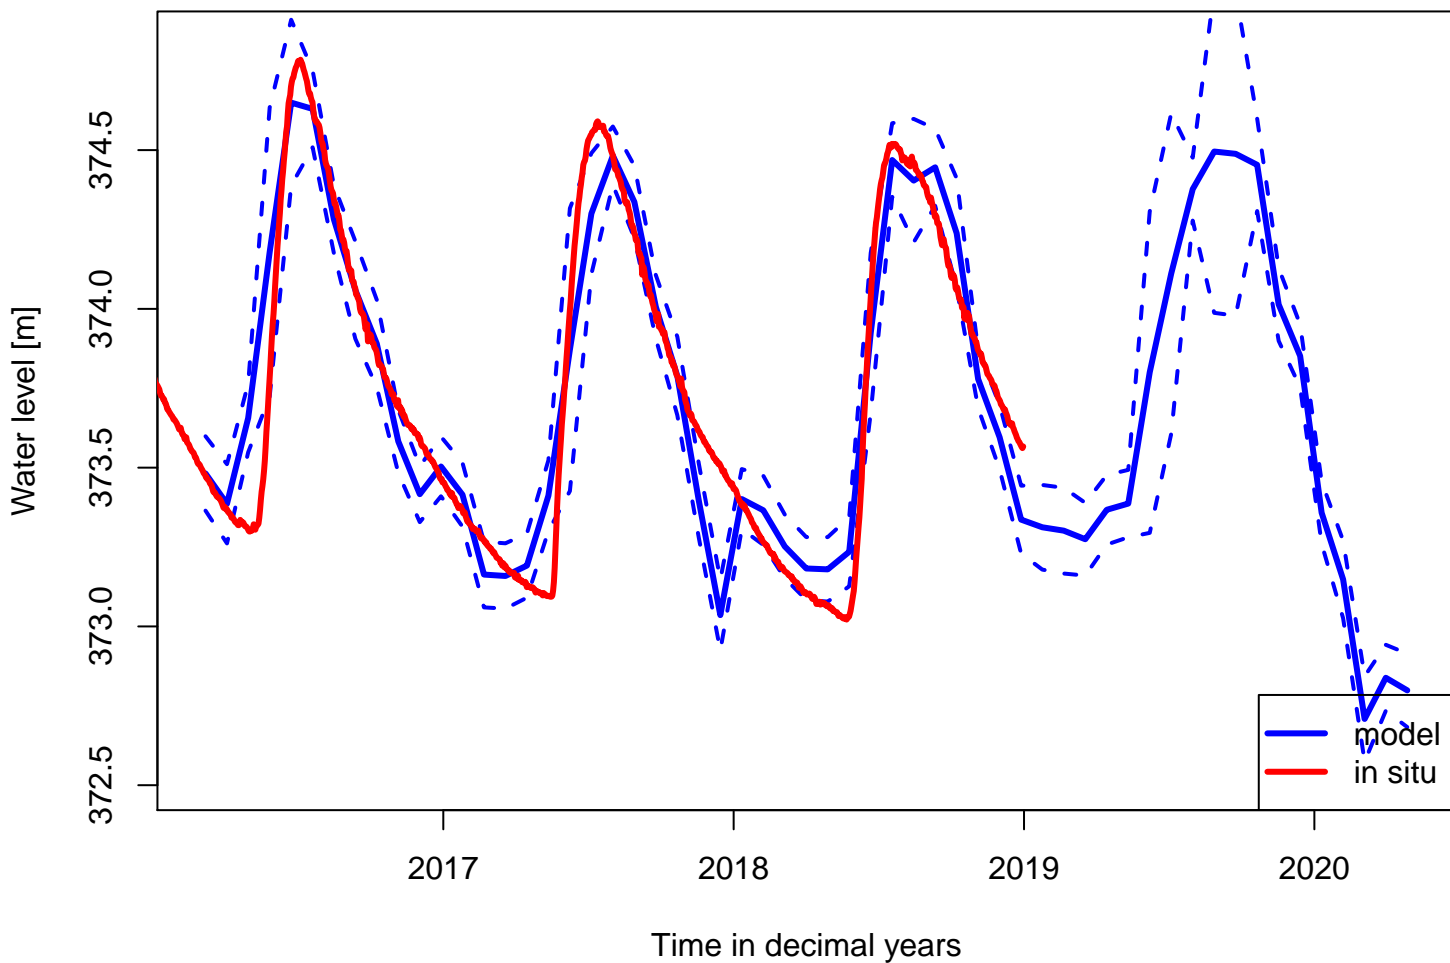

Supplement: s1 [file s1]

**lakename: lakeid: 749 lat: 45.82 lon: -77.13**

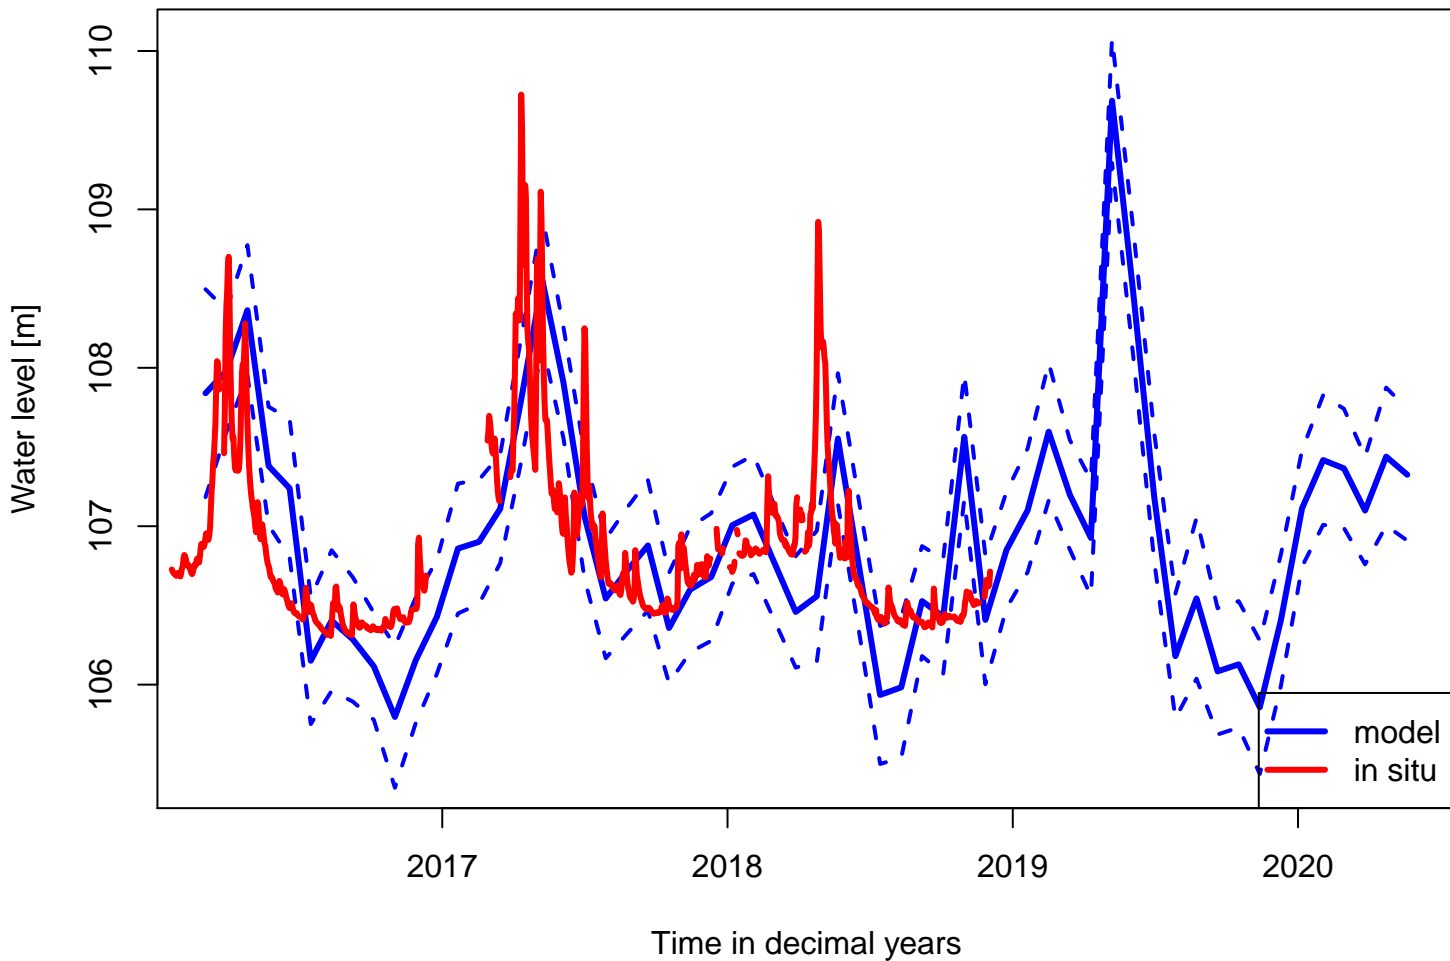

Supplement: s1 [file s1]

**lakename: Sacandaga Reservoir lakeid: 9074 lat: 43.32 lon: -73.93**

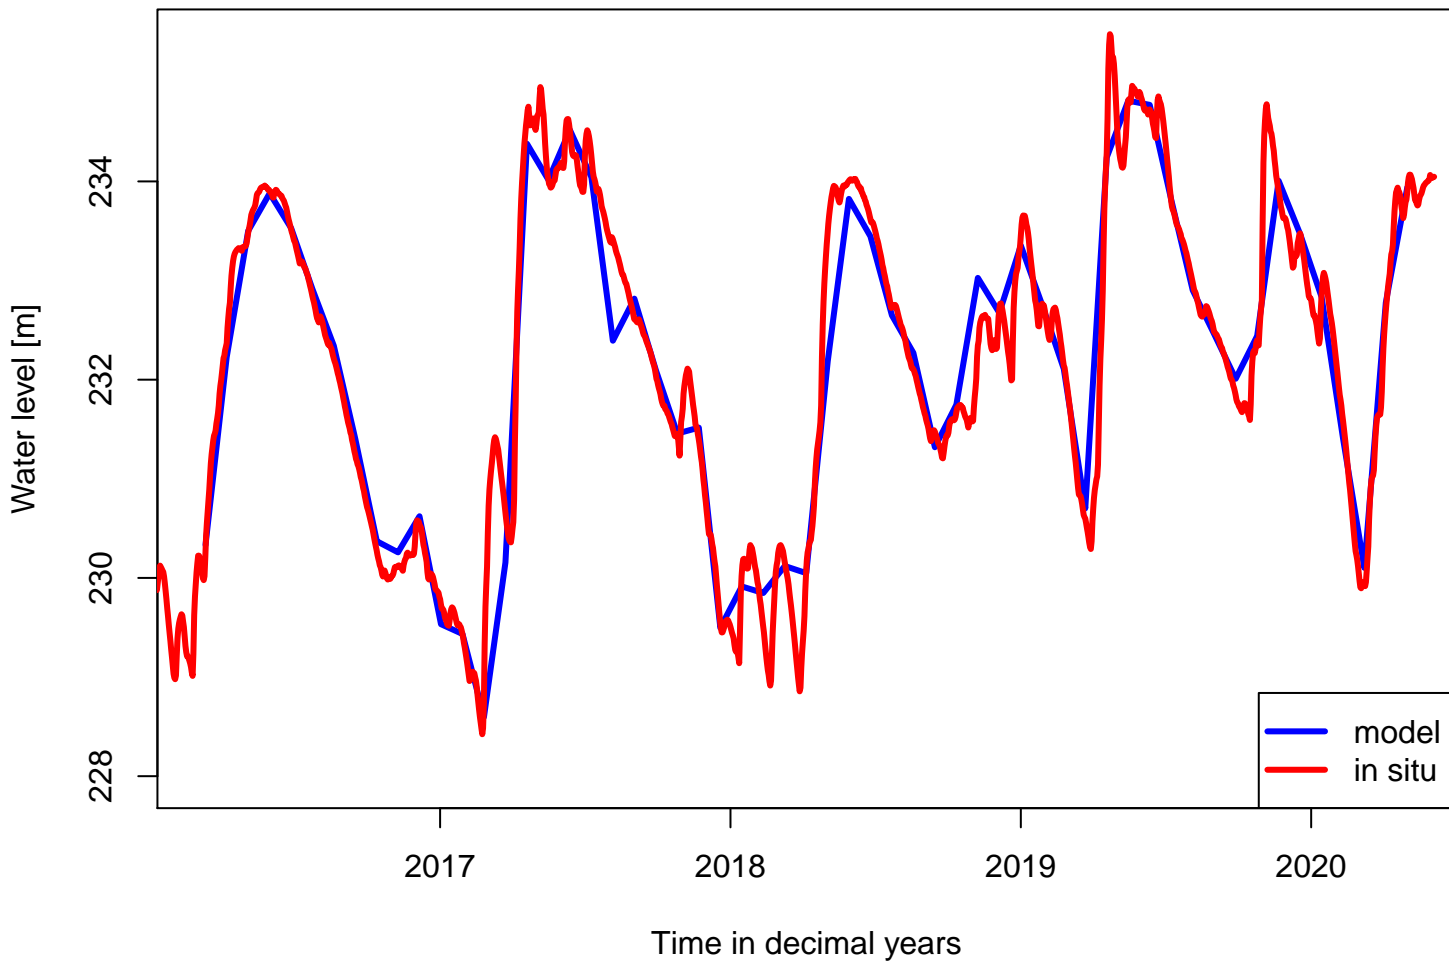

Supplement: s1 [file s1]

**lakename: lakeid: 616 lat: 52.67 lon: -93.99**

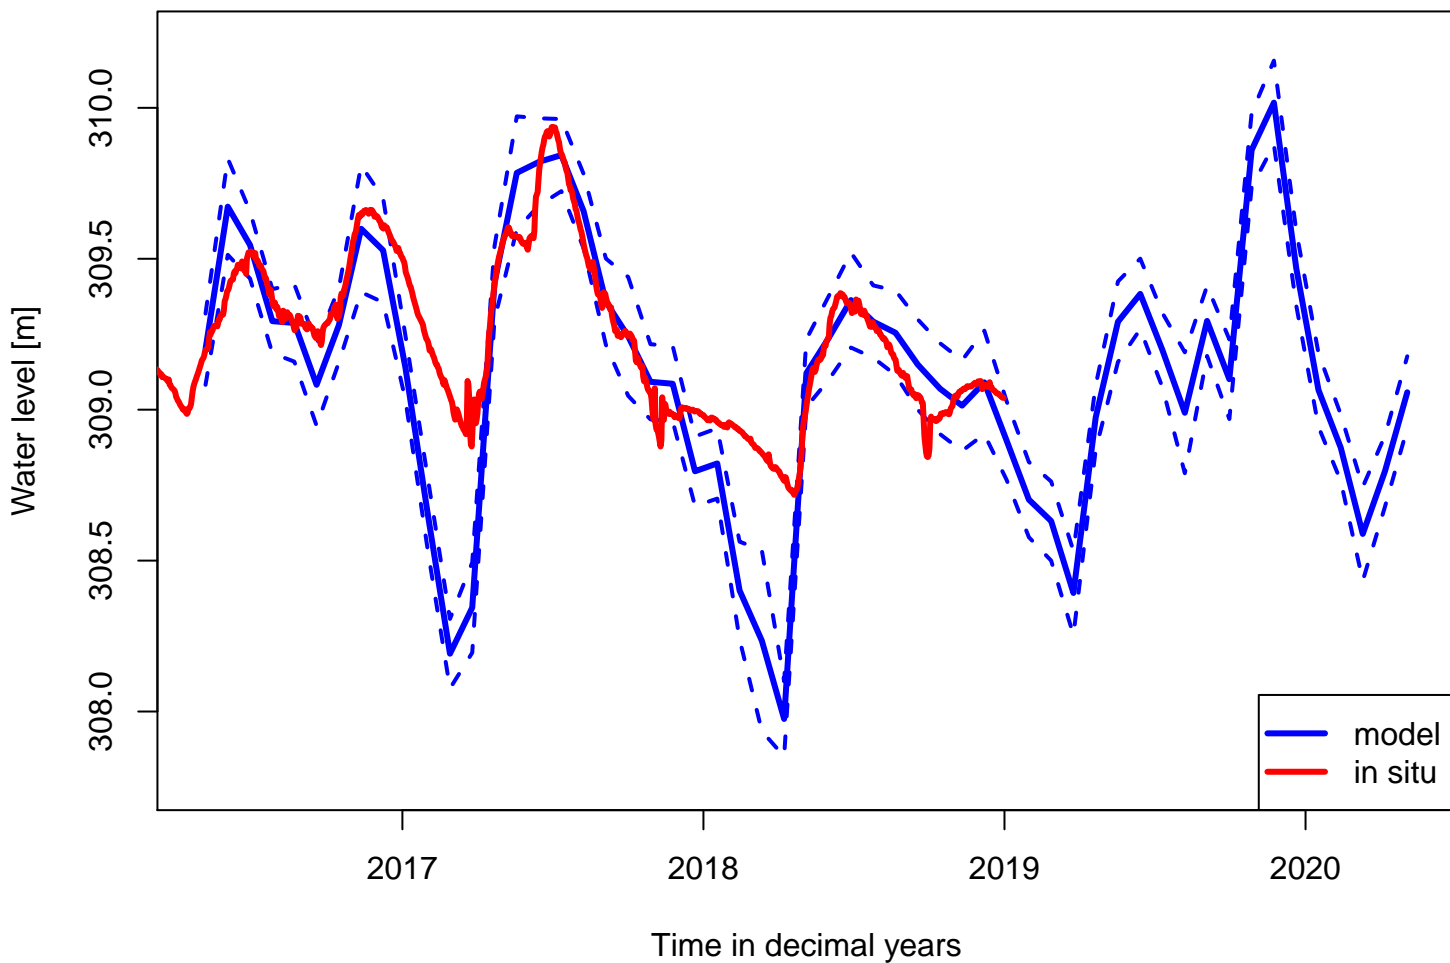

Supplement: s1 [file s1]

**lakename: Coeur d'Alene Lake lakeid: 729 lat: 47.67 lon: -116.8**

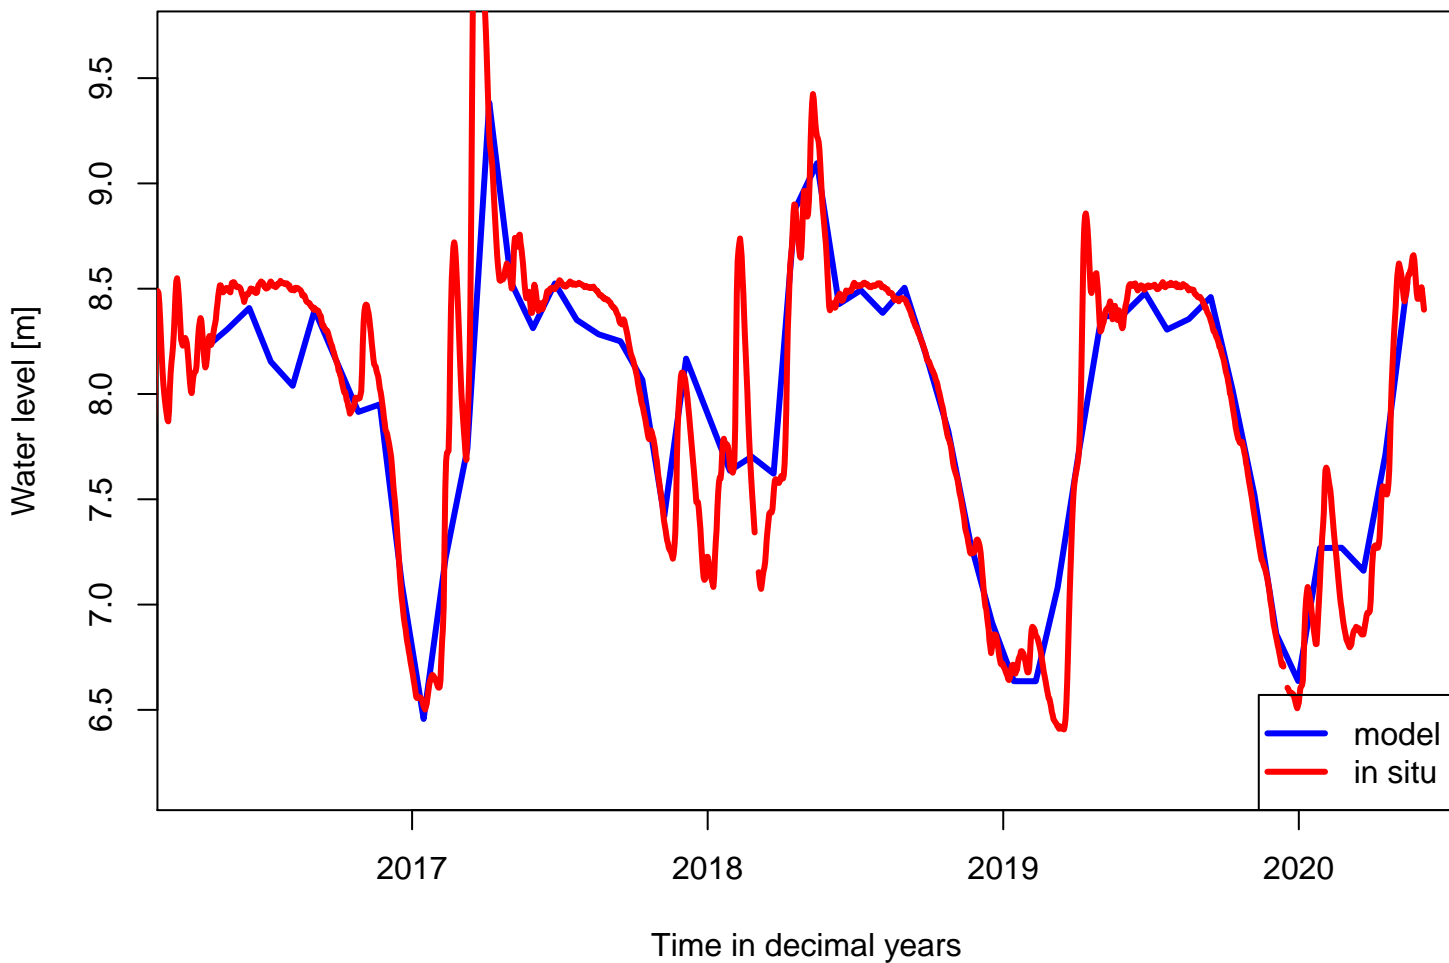

Supplement: s1 [file s1]

**lakename: lakeid: 633 lat: 52.04 lon: -95.46**

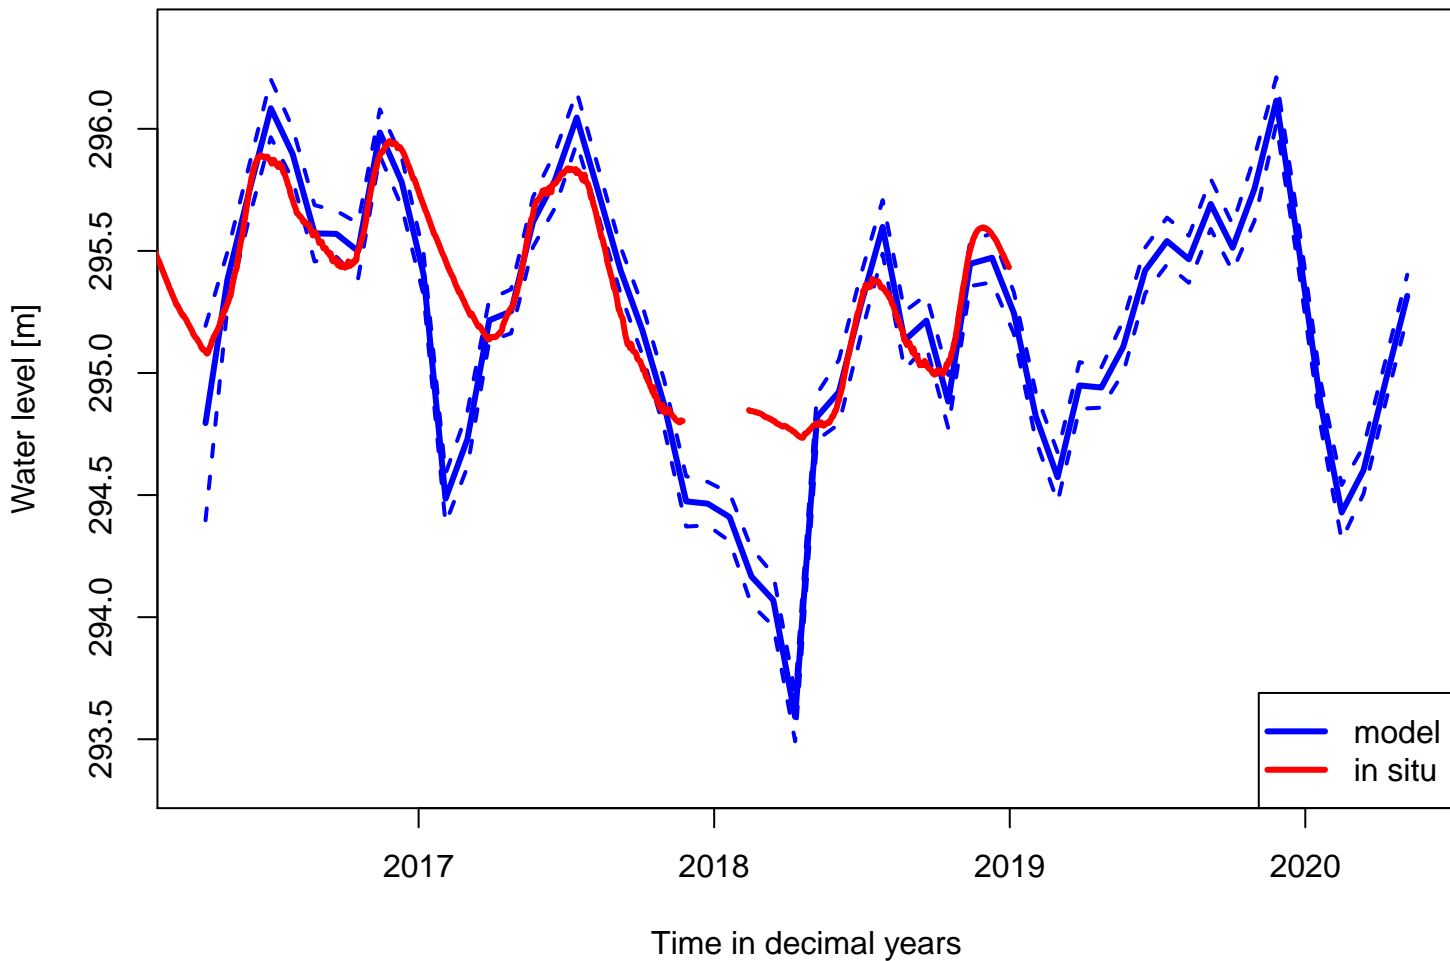

Supplement: s1 [file s1]

**lakename: Stockton Lake lakeid: 9273 lat: 37.69 lon: -93.77**

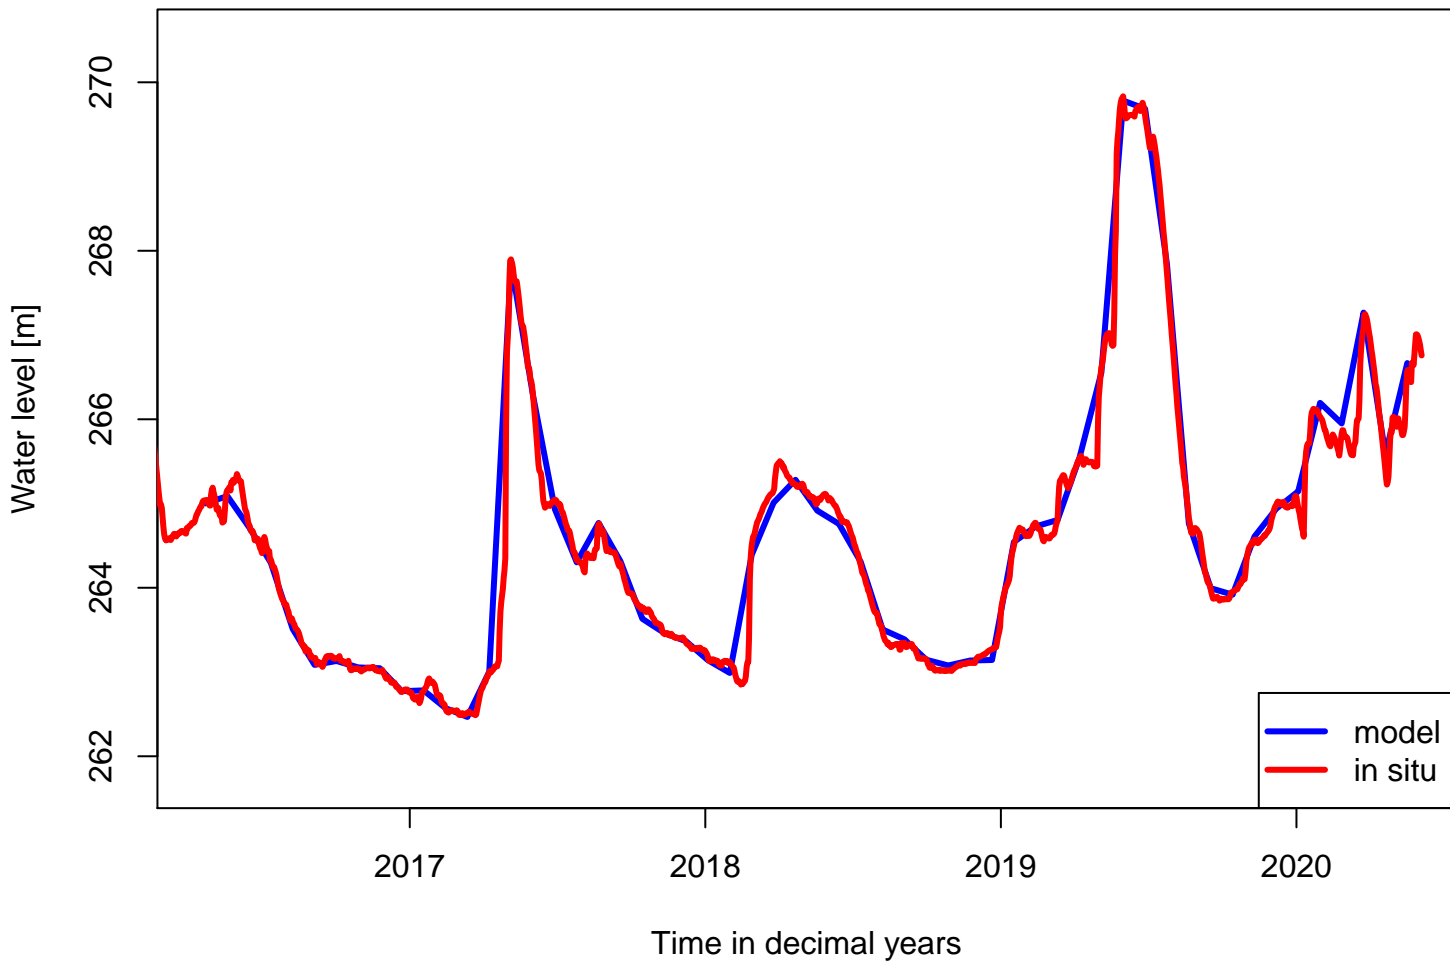

Supplement: s1 [file s1]

**lakename: Split lakeid: 479 lat: 56.24 lon: -96.09**

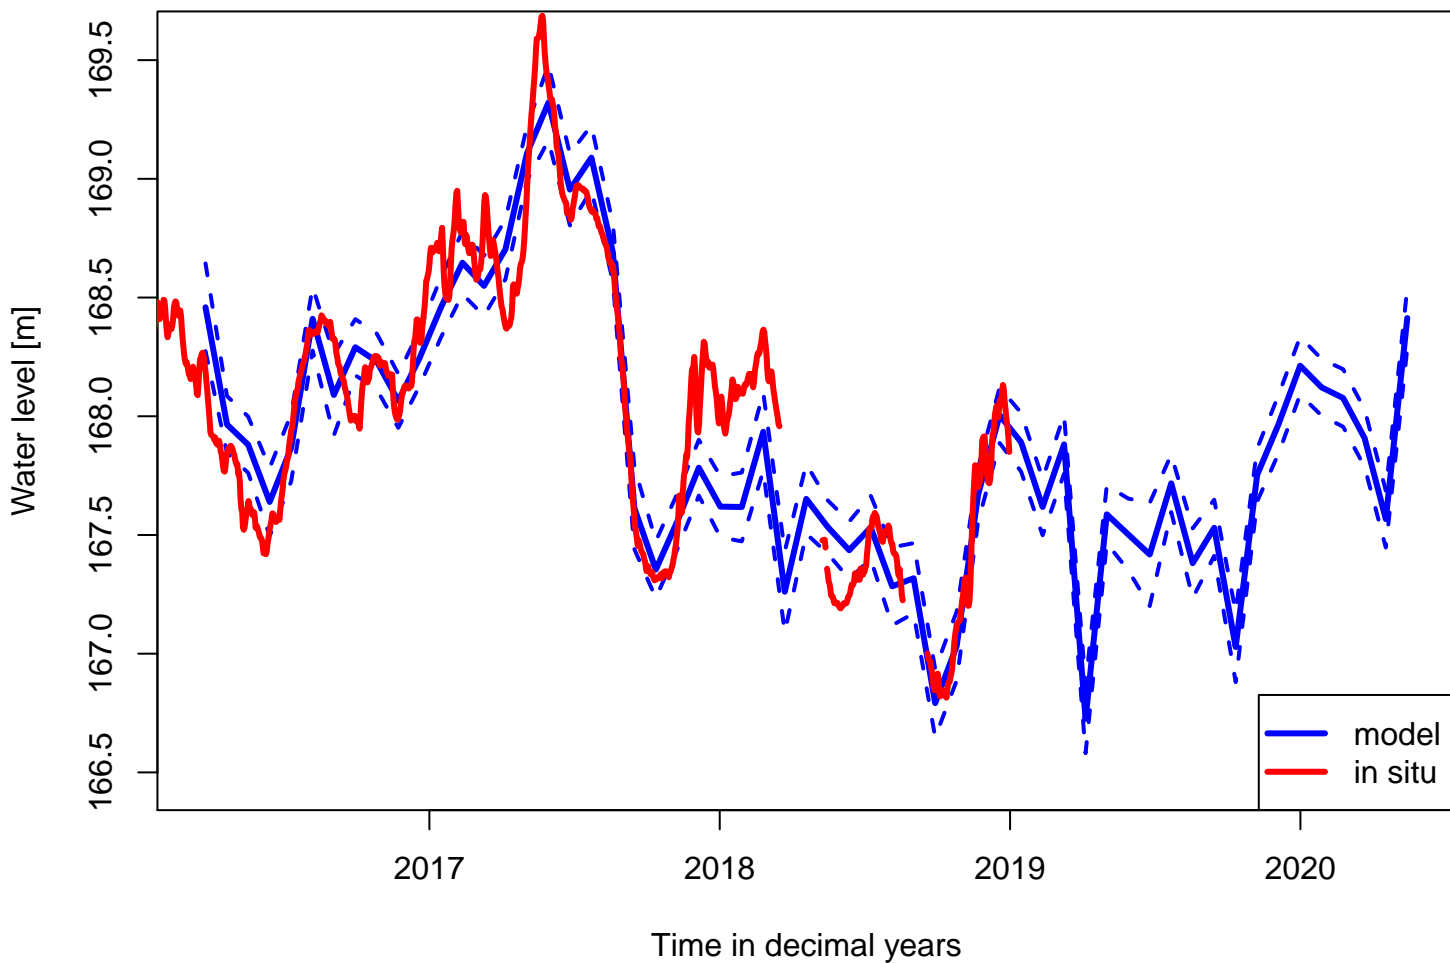

Supplement: s1 [file s1]

**lakename: Seul lakeid: 56 lat: 50.32 lon: -92.27**

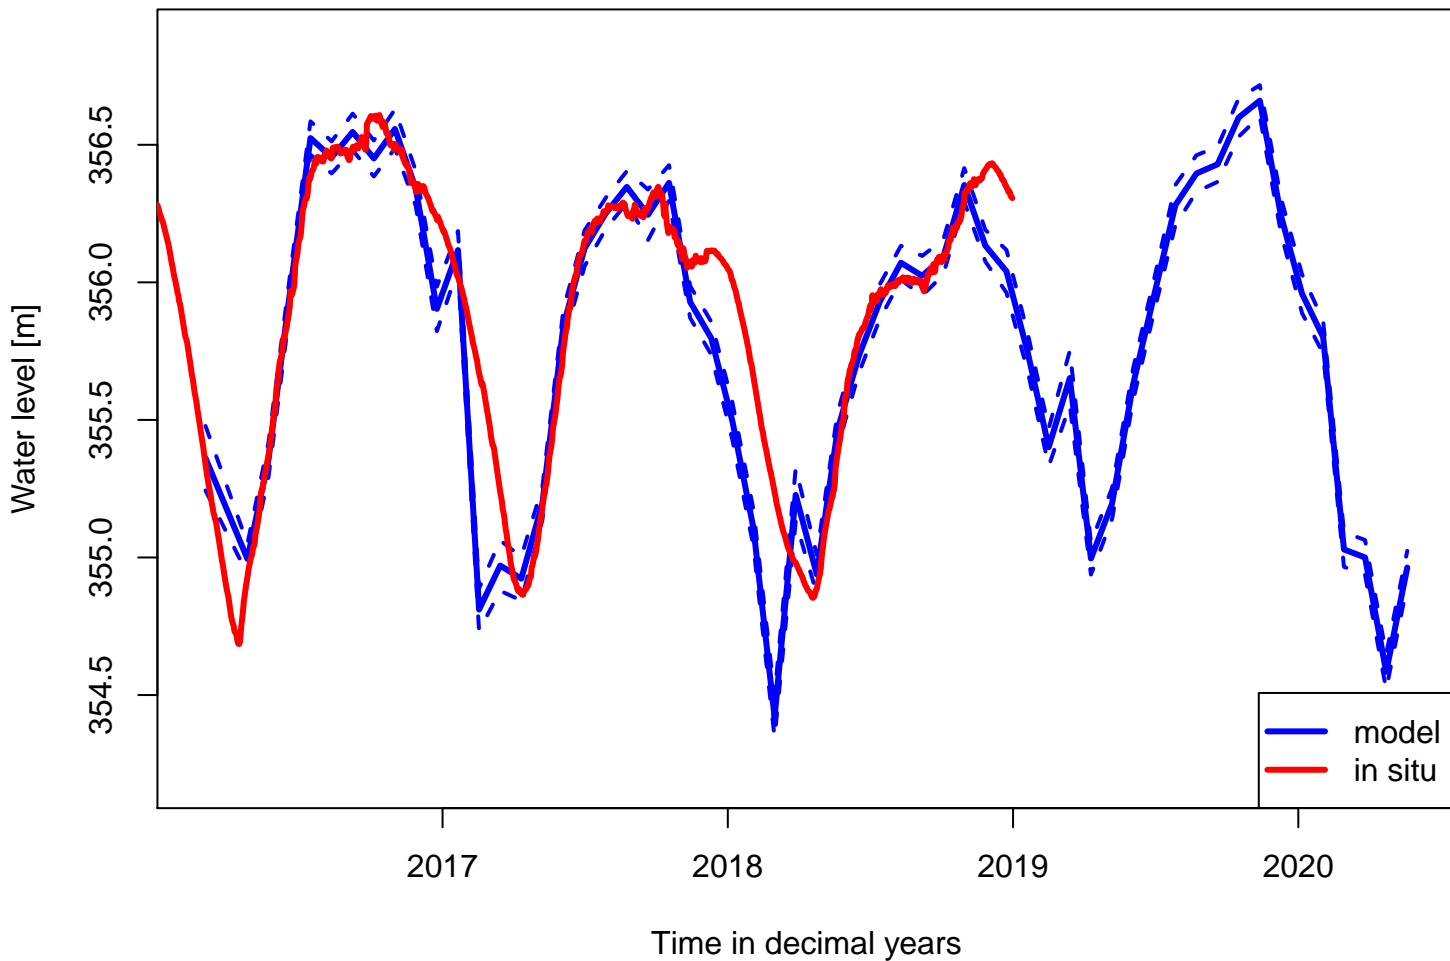

Supplement: s1 [file s1]

**lakename: Lake George lakeid: 767 lat: 43.81 lon: -73.46**

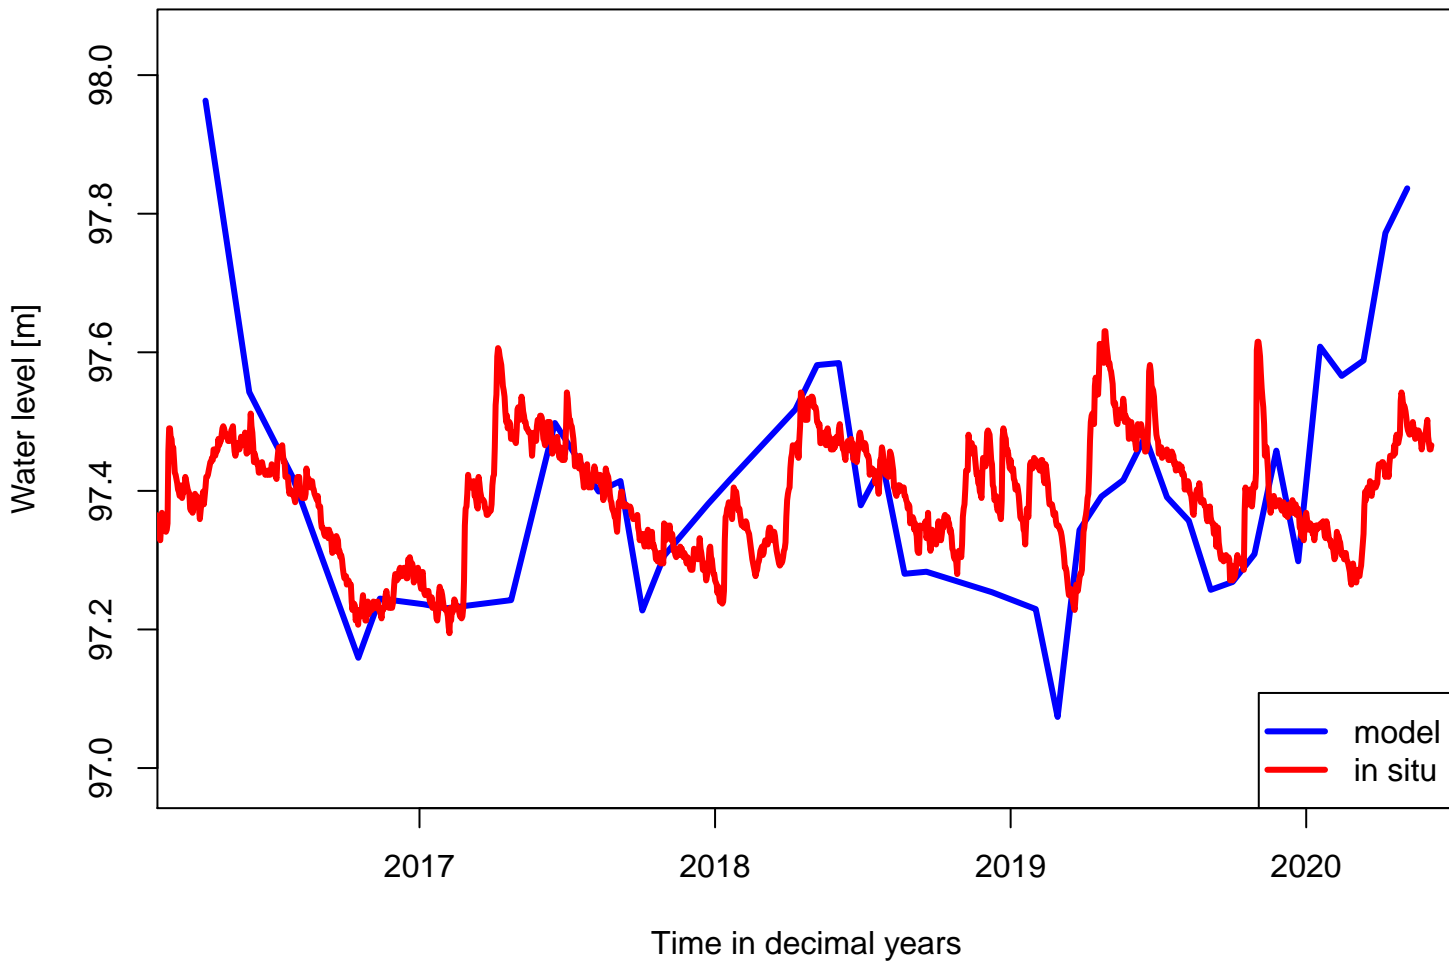

Supplement: s1 [file s1]

**lakename: Rathbun Lake lakeid: 9169 lat: 40.83 lon: -92.89**

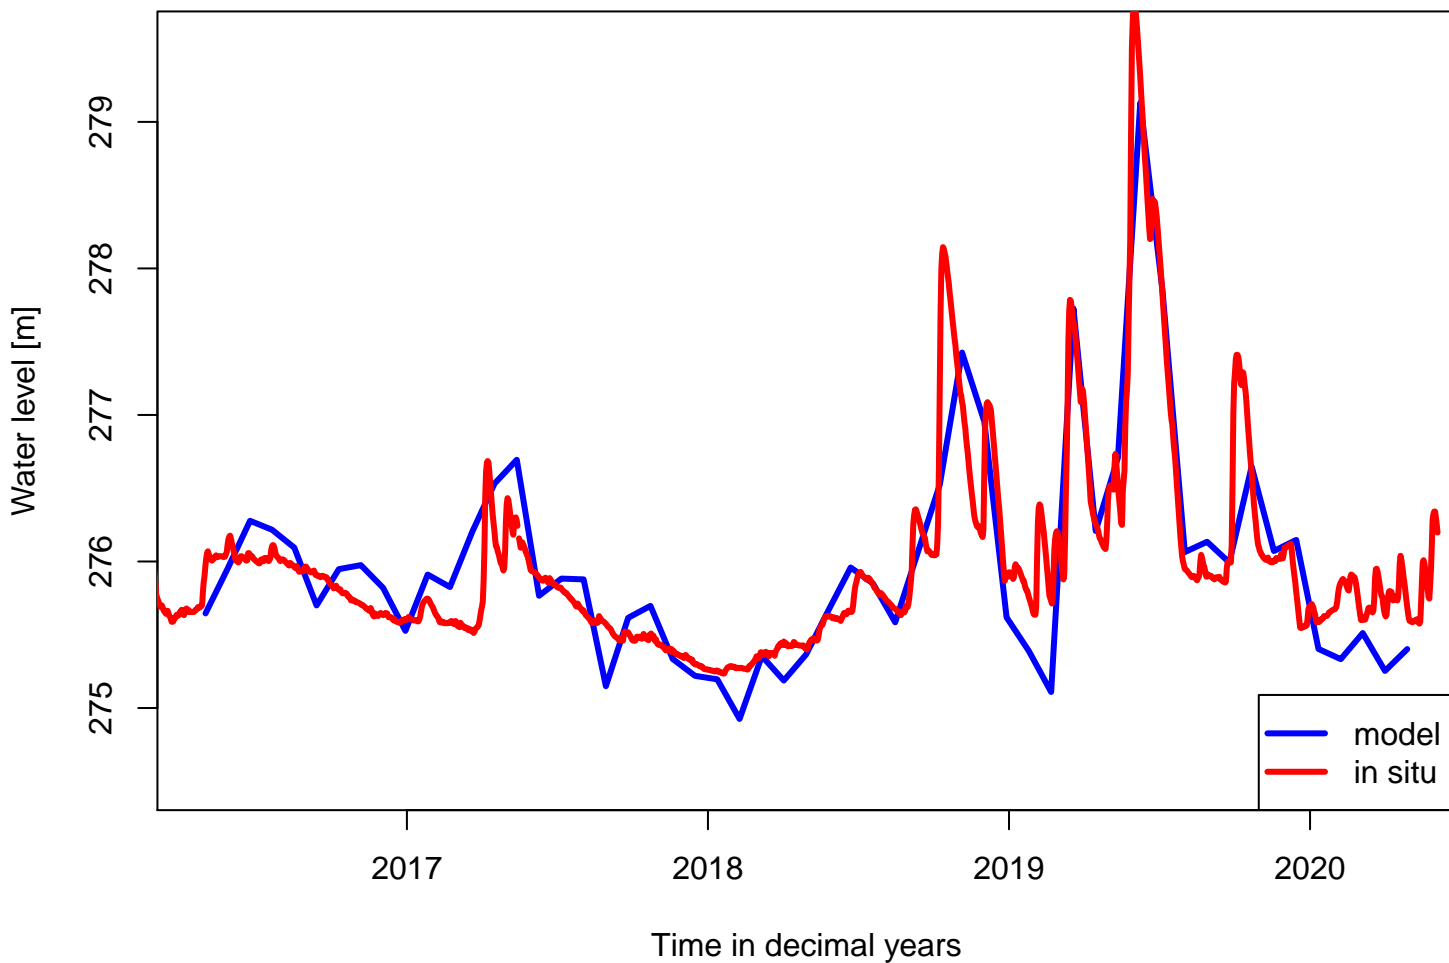

Supplement: s1 [file s1]

**lakename: Nechako Reservoir lakeid: 591 lat: 53.65 lon: -127.5**

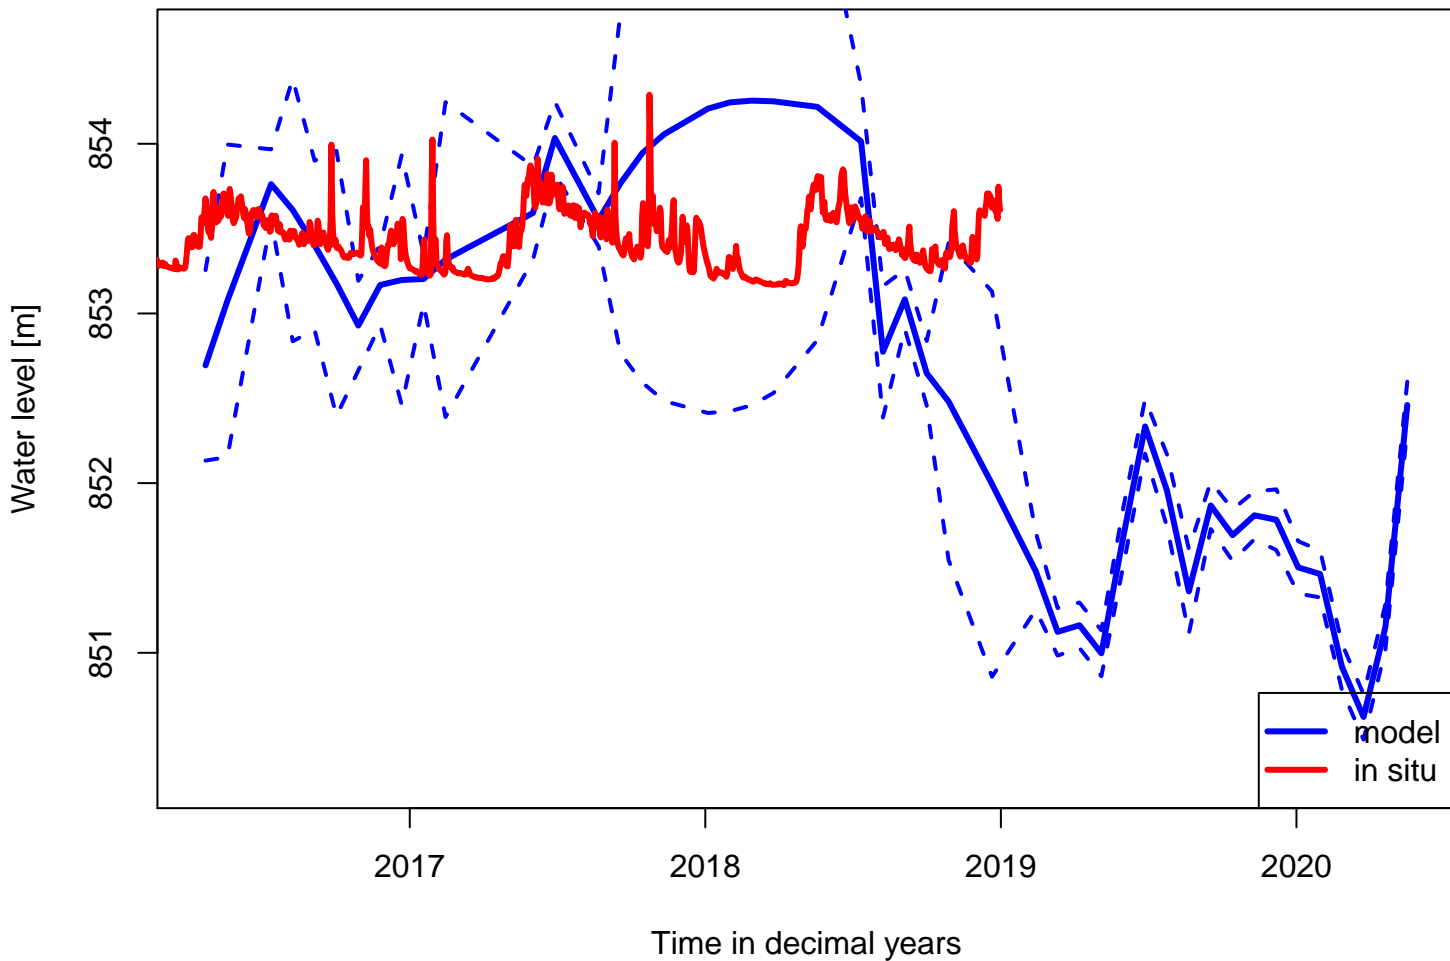

Supplement: s1 [file s1]

**lakename: Winnipegosis lakeid: 52 lat: 51.65 lon: -99.92**

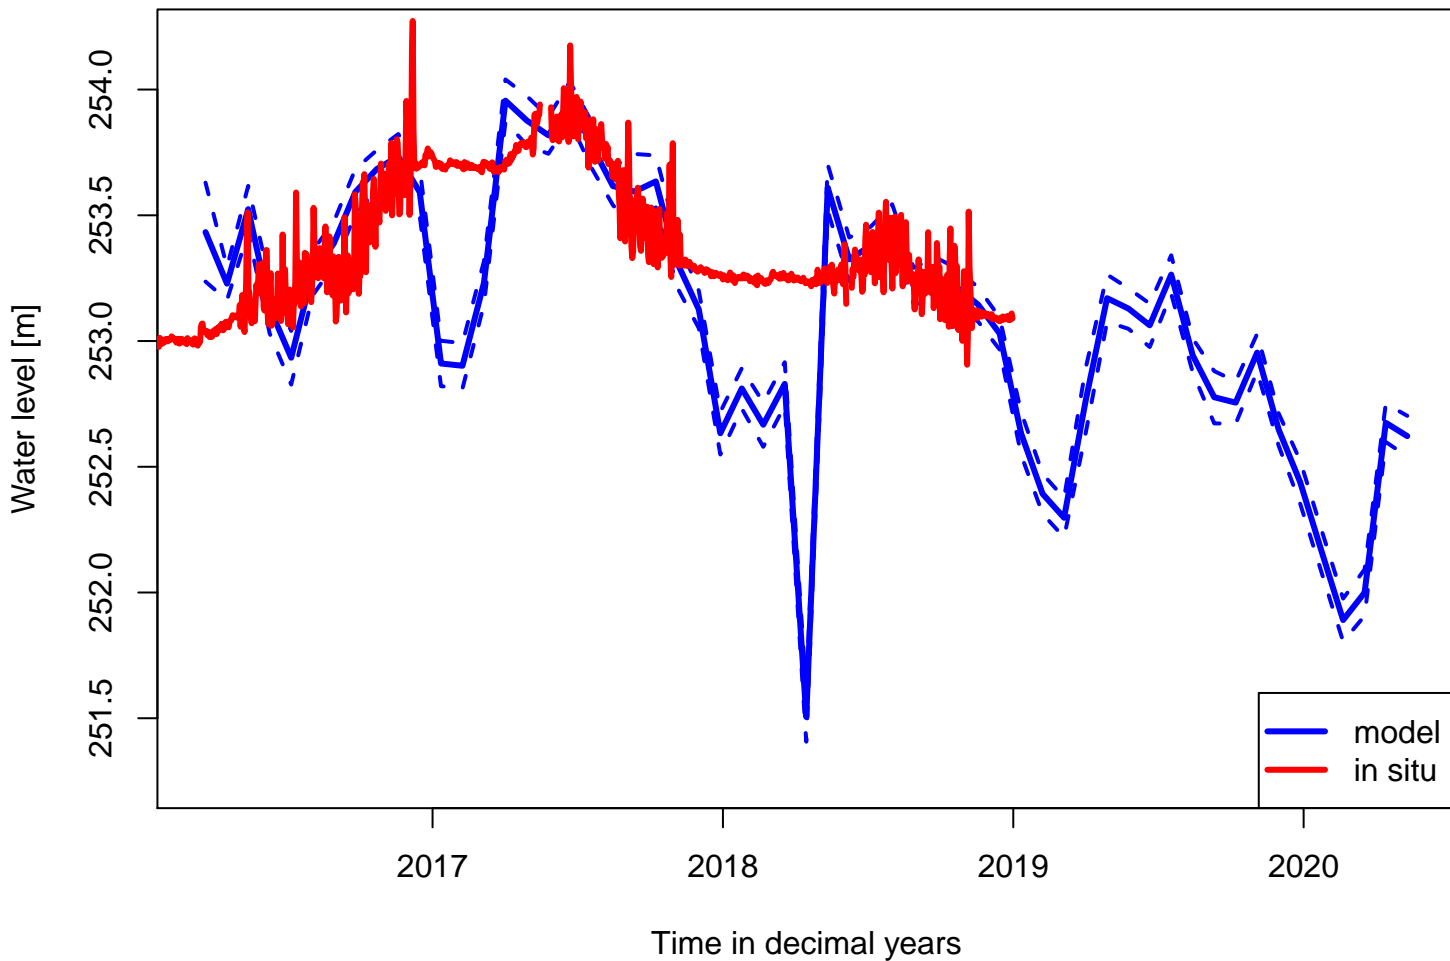

Supplement: s1 [file s1]

**lakename: Victoria lakeid: 717 lat: 48.36 lon: -57.12**

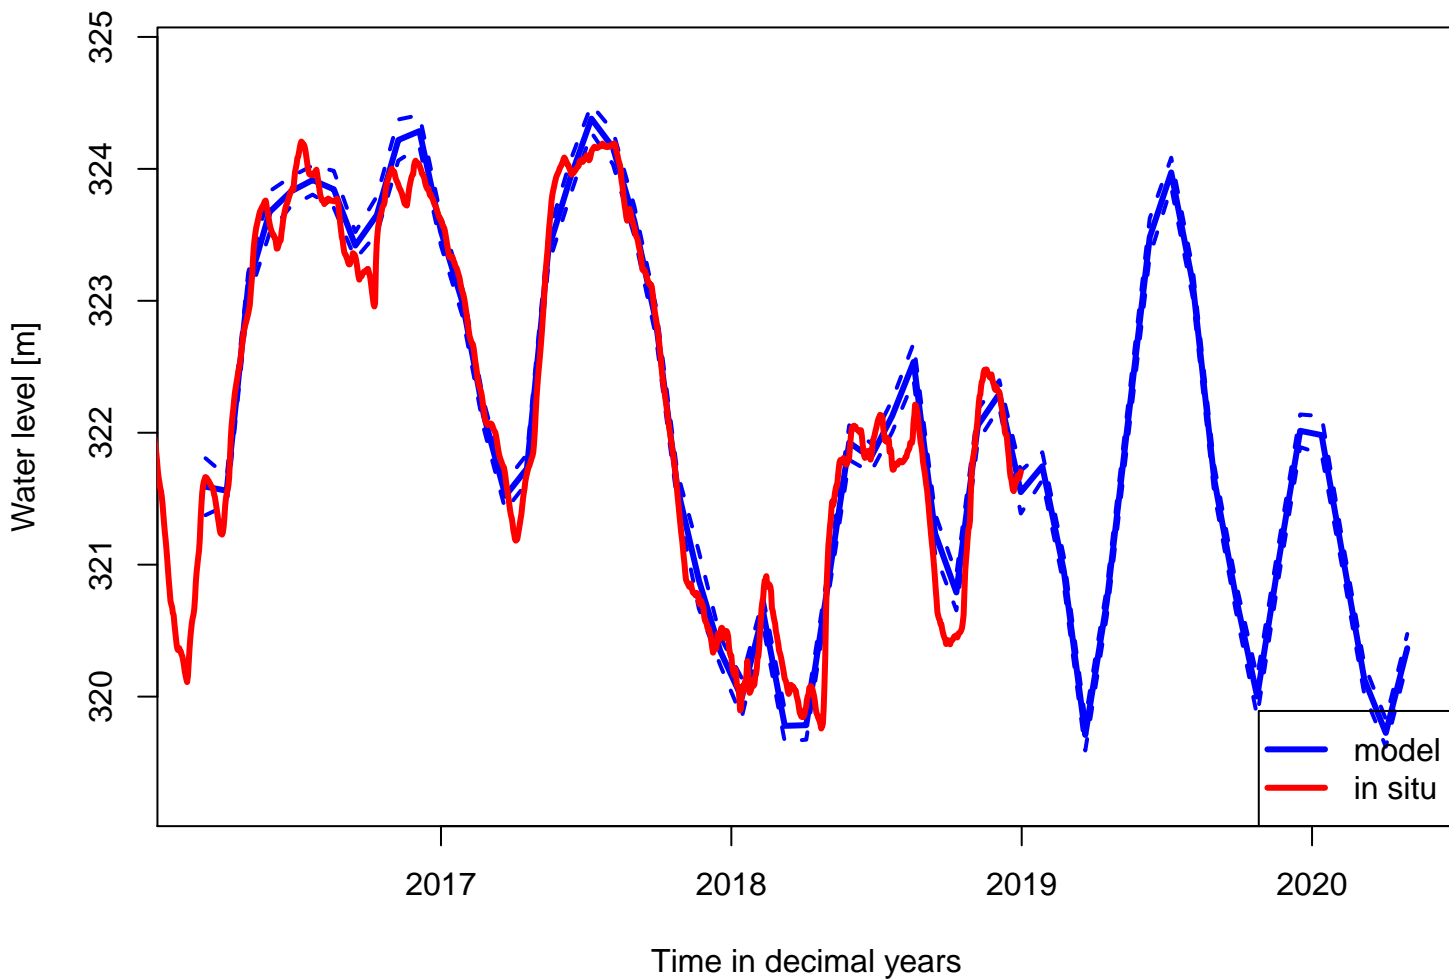

Supplement: s1 [file s1]

**lakename: Adams lakeid: 651 lat: 50.94 lon: -119.7**

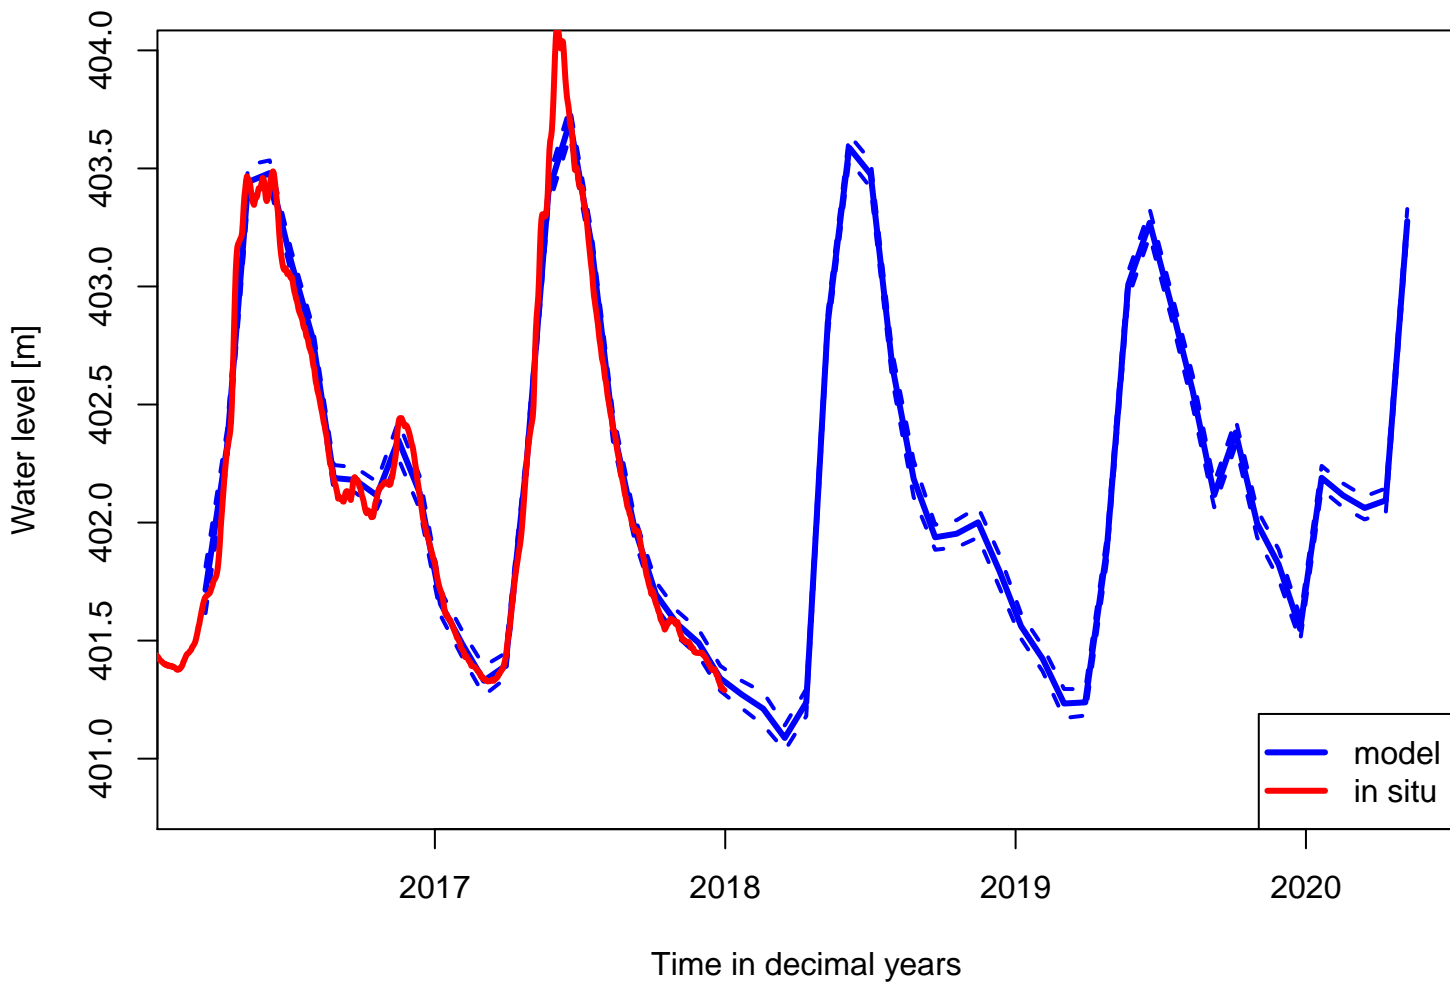

Supplement: s1 [file s1]

**lakename: Kiskittogisu lakeid: 553 lat: 54.44 lon: -98**

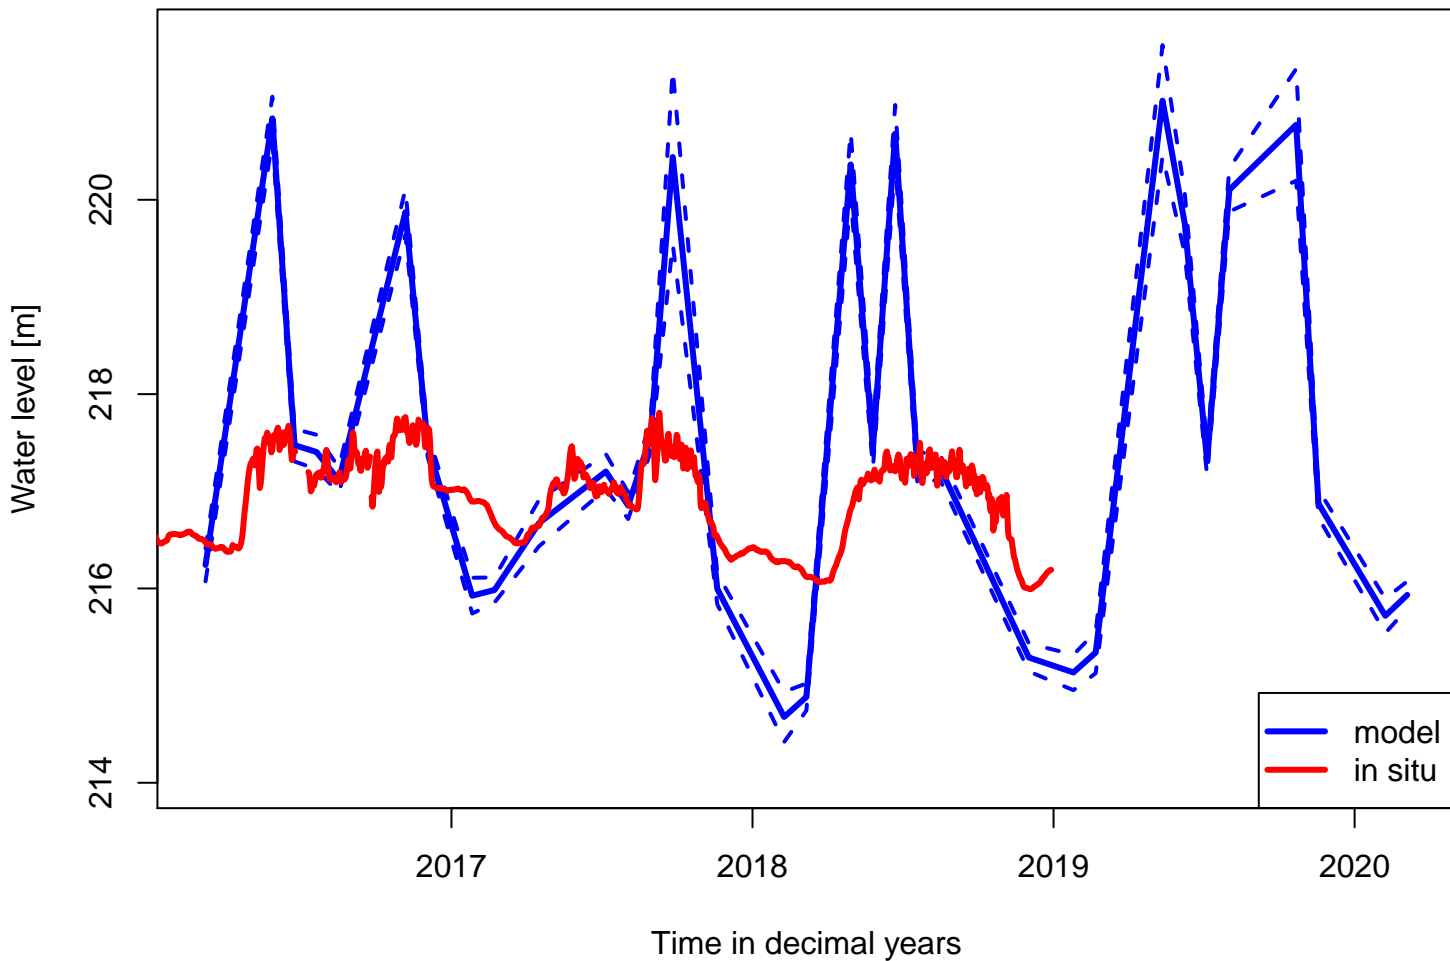

Supplement: s1 [file s1]

**lakename: Lake George lakeid: 767 lat: 43.81 lon: -73.46**

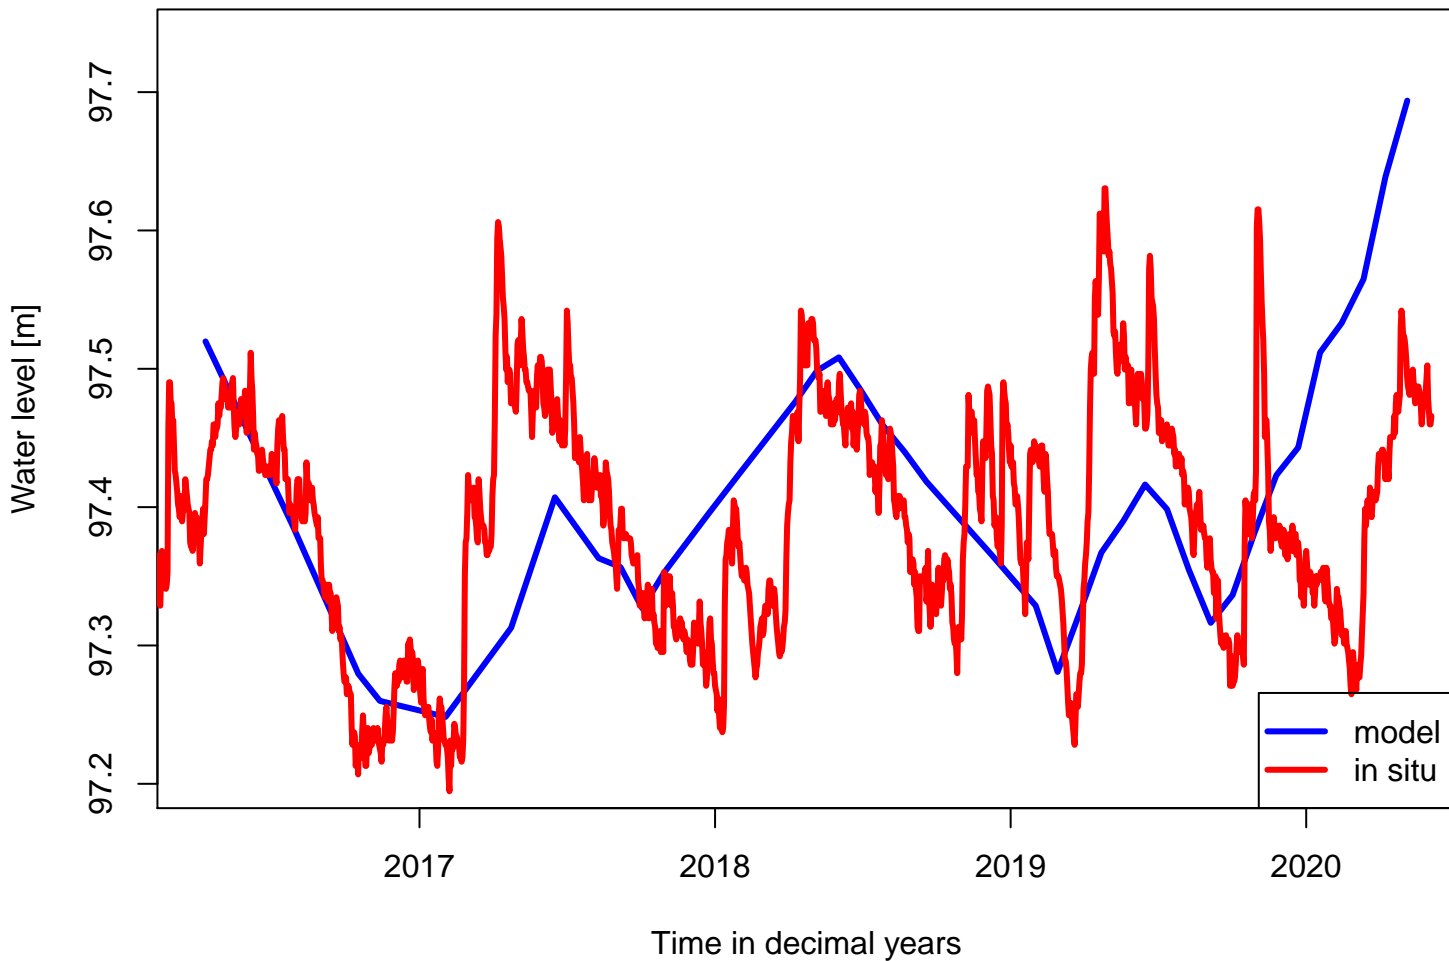

Supplement: s1 [file s1]

**lakename: lakeid: 609 lat: 52.96 lon: -87.69**

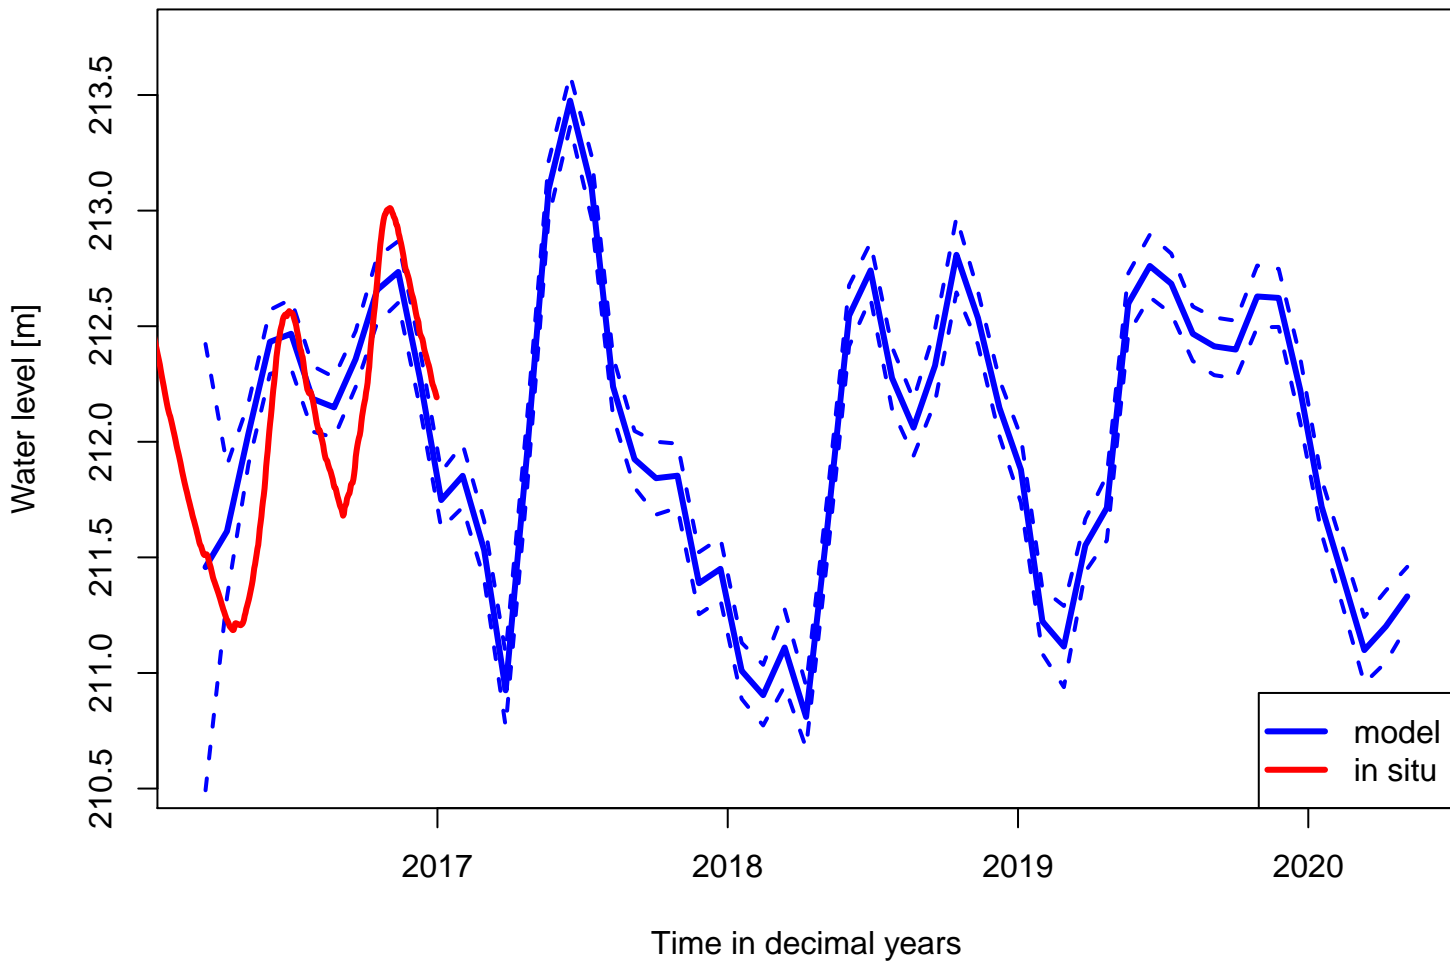

Supplement: s1 [file s1]

**lakename: lakeid: 713 lat: 48.5 lon: -92.66**

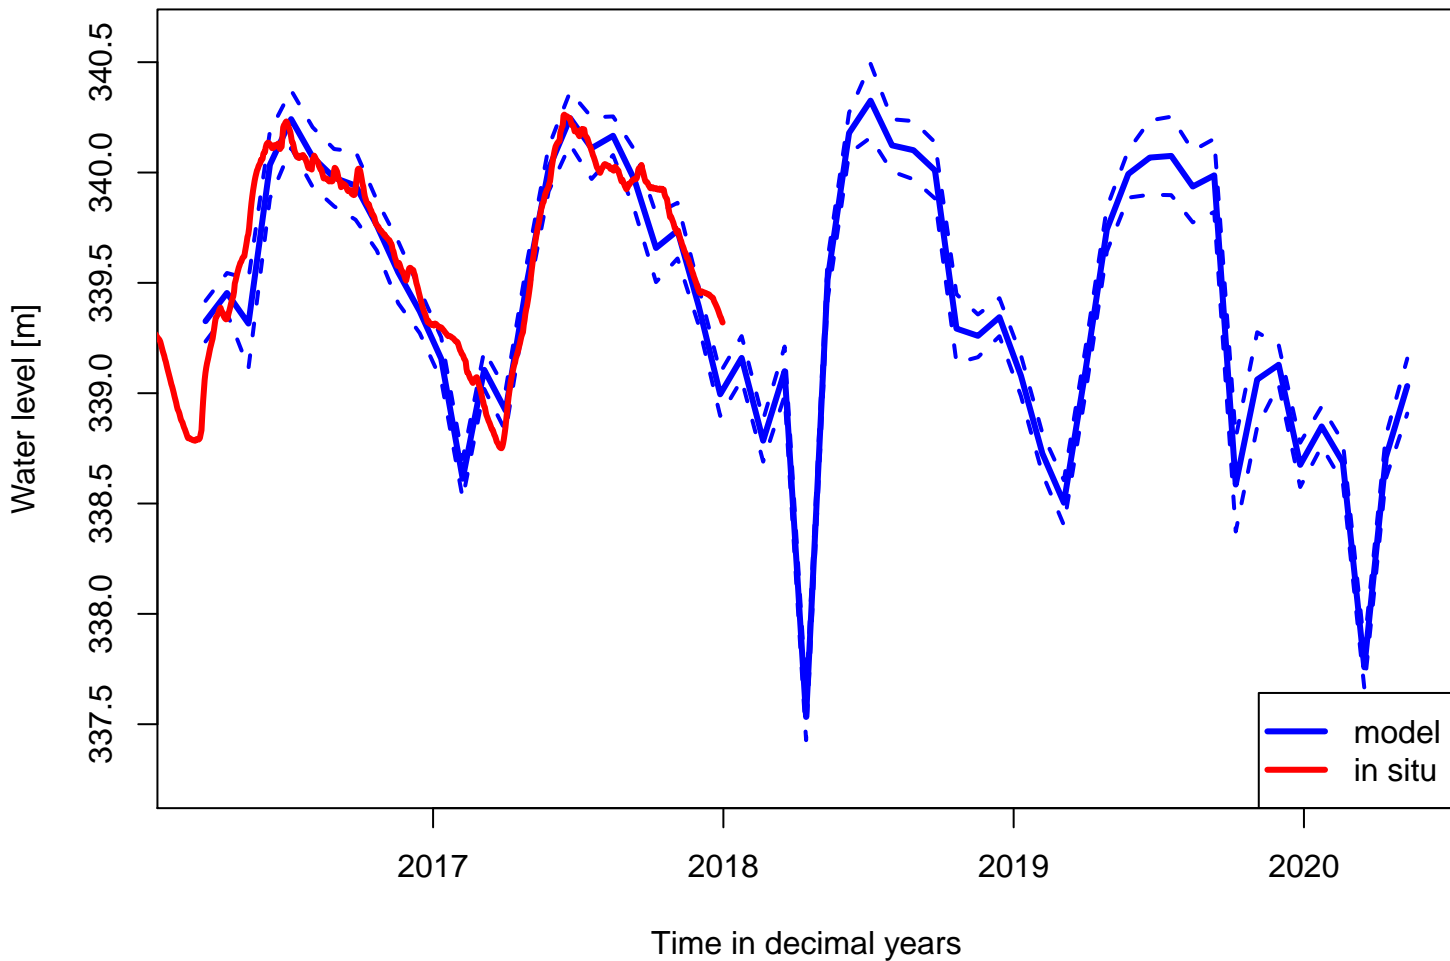

Supplement: s1 [file s1]

**lakename: Manitoba lakeid: 53 lat: 51.44 lon: -98.8**

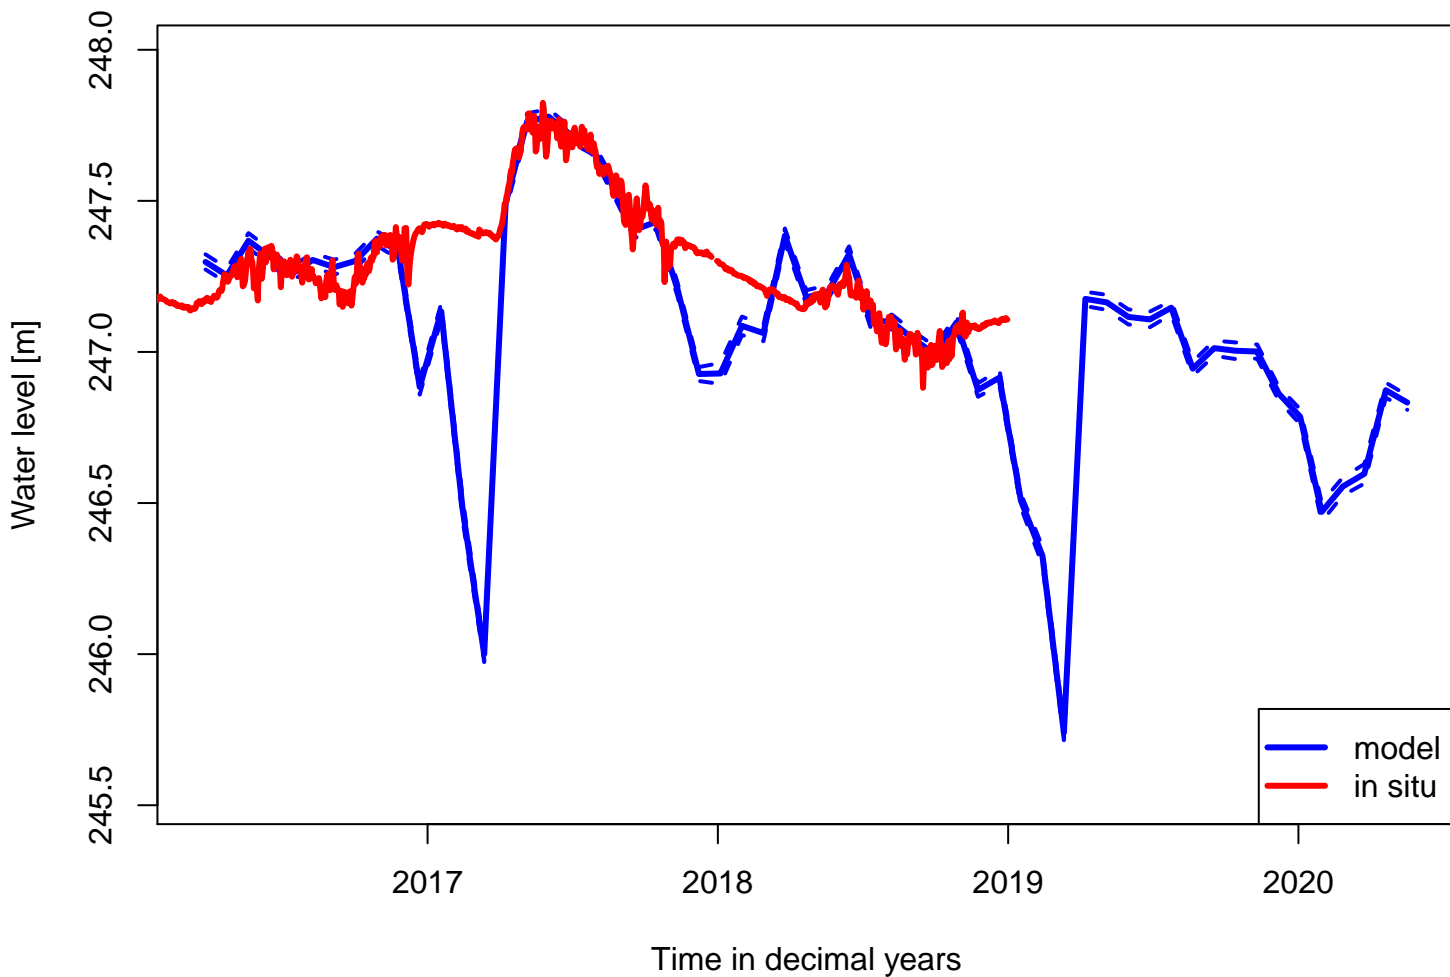

Supplement: s1 [file s1]

**lakename: lakeid: 6354 lat: 54.62 lon: -97.79**

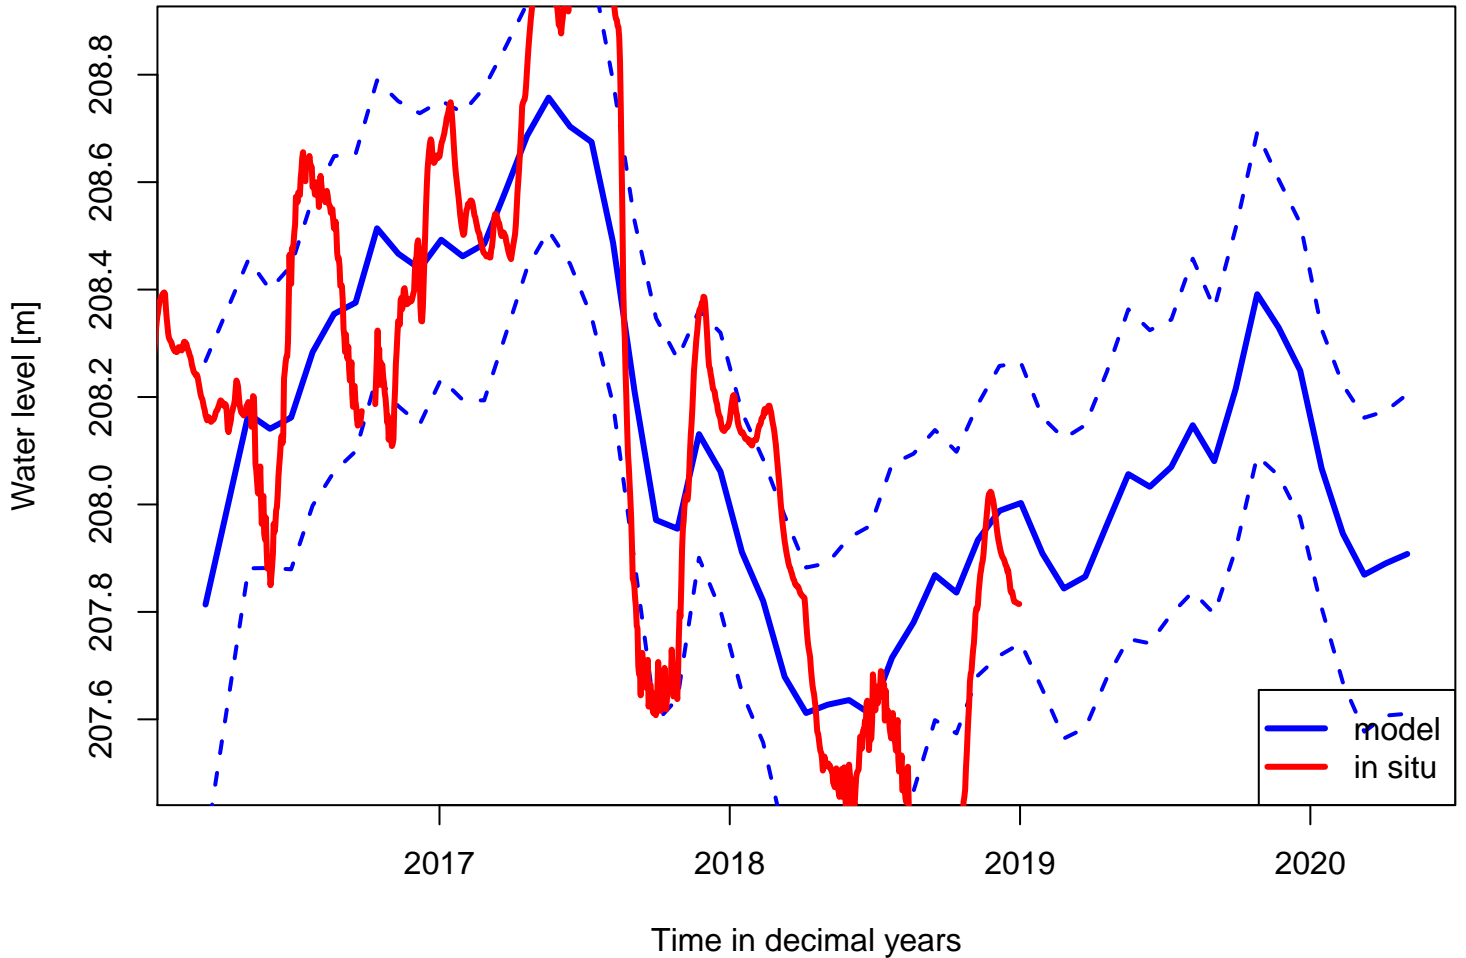

Supplement: s1 [file s1]

**lakename: Richard B. Russell Lake lakeid: 9410 lat: 34.1 lon: -82.62**

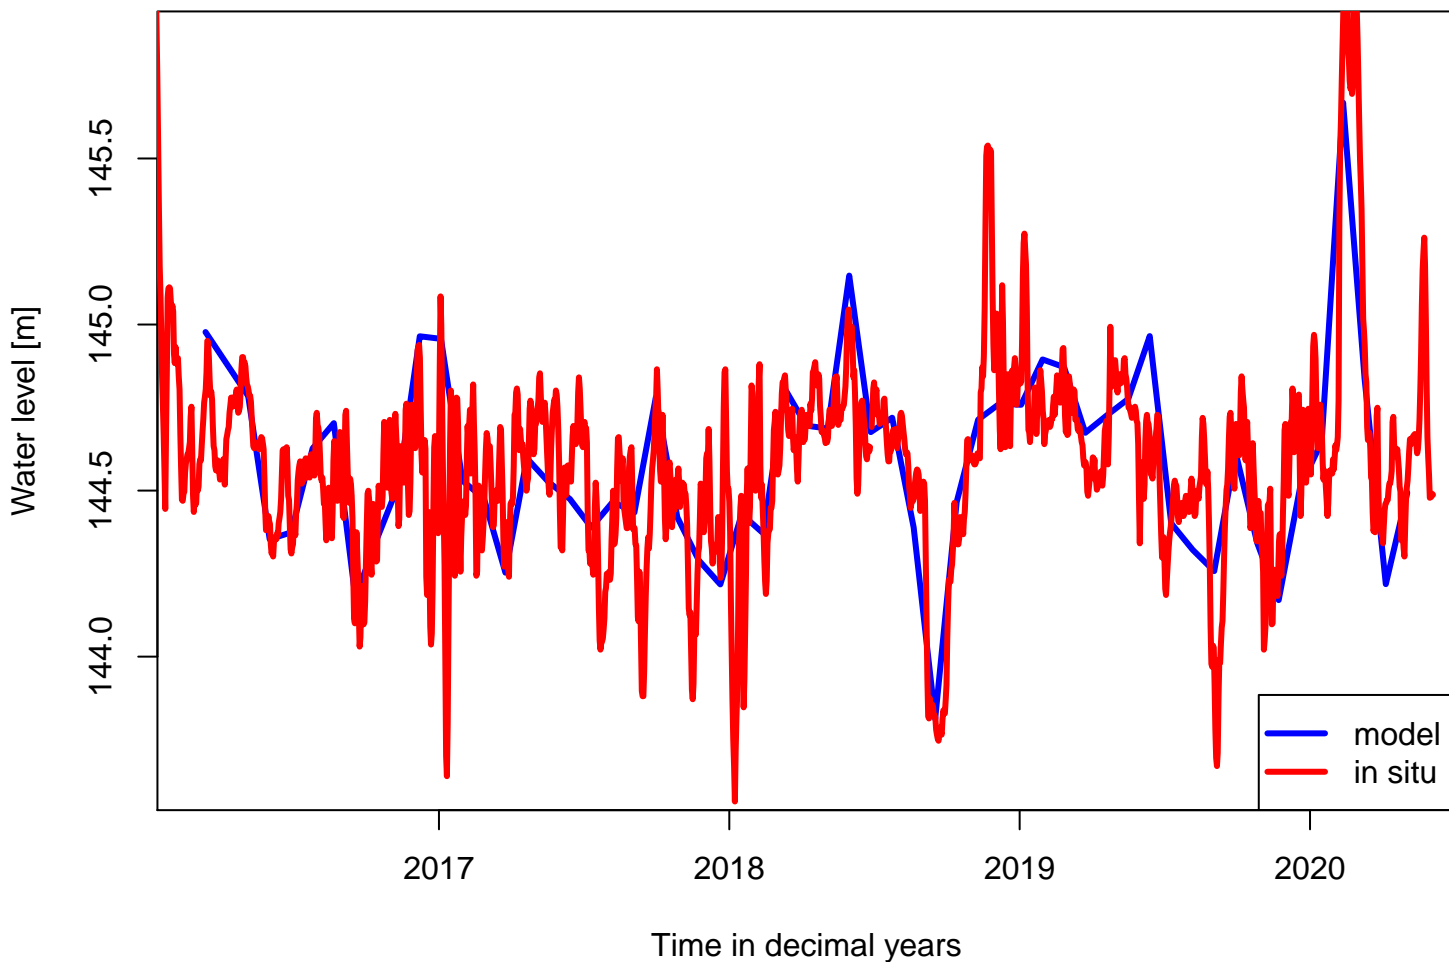

Supplement: s1 [file s1]

**lakename: Arrow lakeid: 698 lat: 49.87 lon: -118.1**

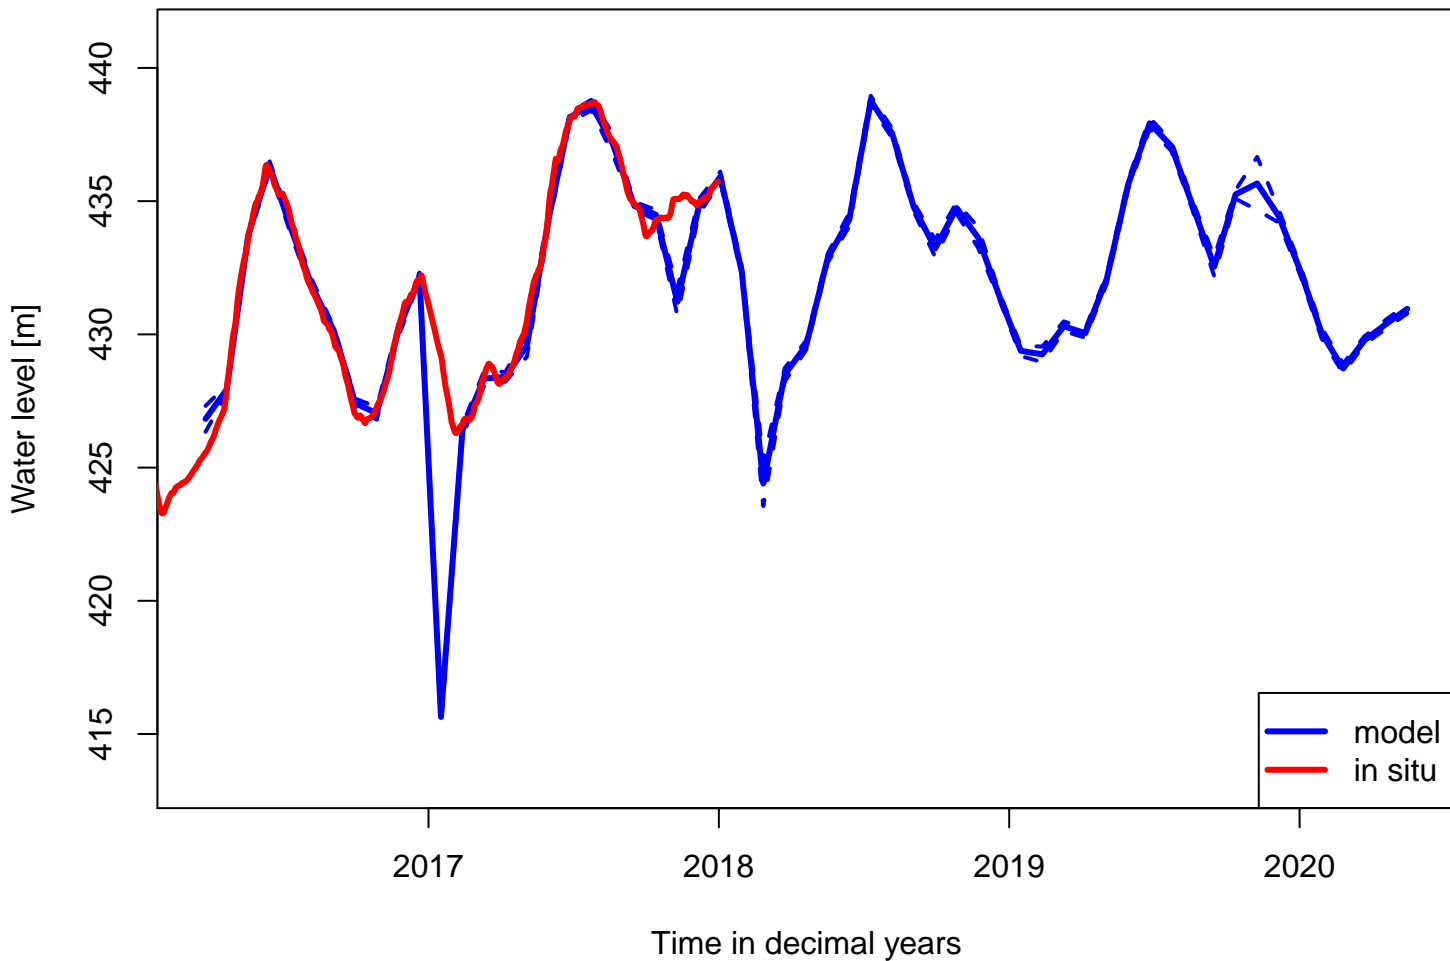

Supplement: s1 [file s1]

**lakename: Calcasieu Lake lakeid: 844 lat: 30.03 lon: -93.3**

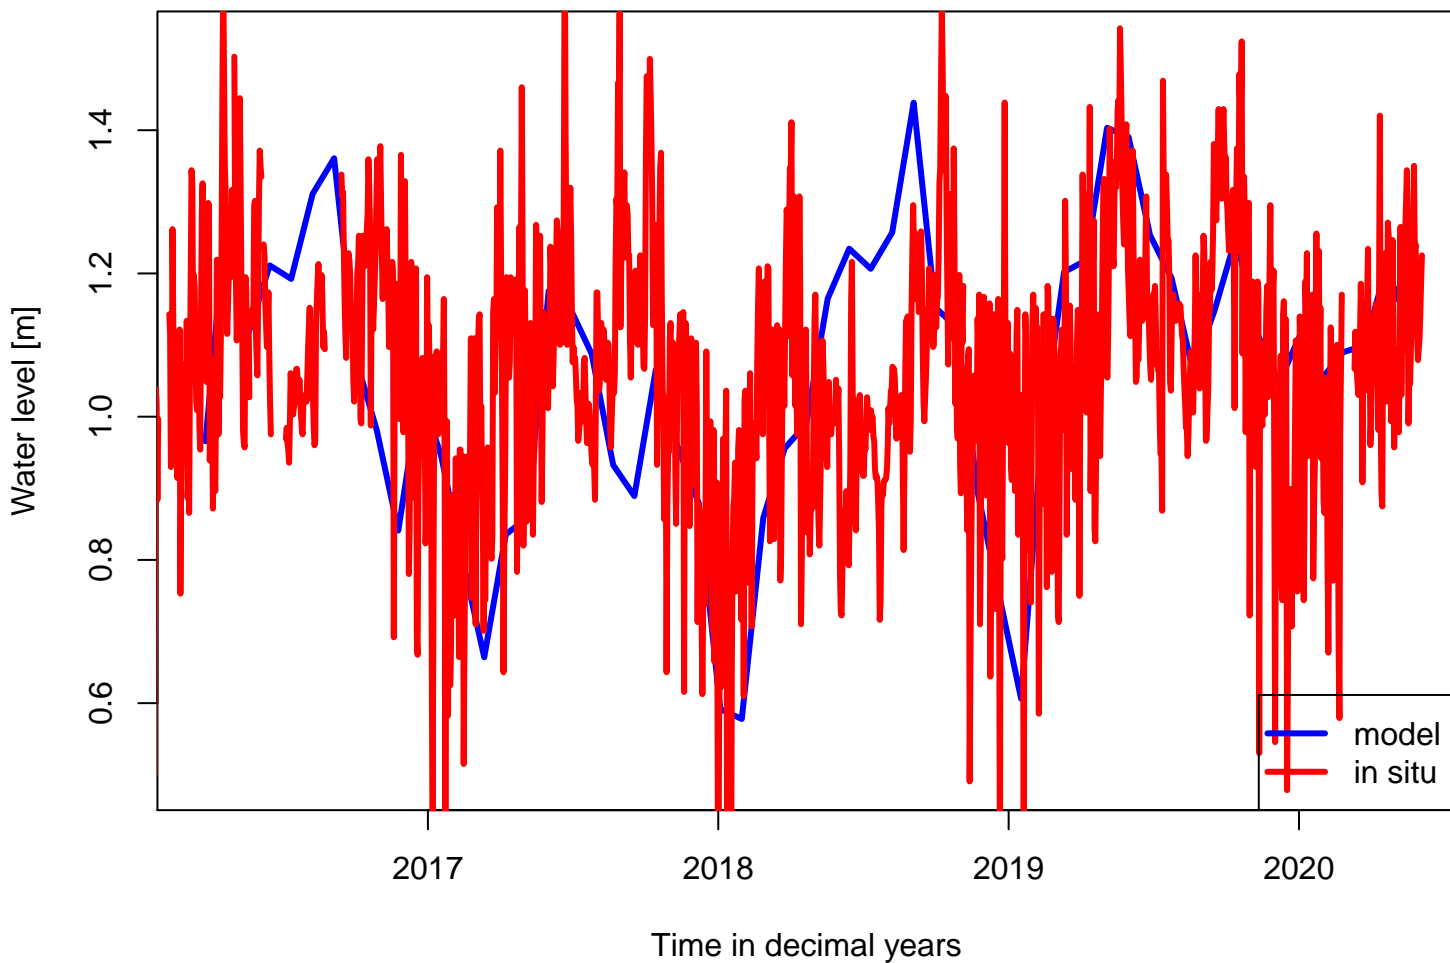

Supplement: s1 [file s1]

**lakename: Teslin lakeid: 394 lat: 60.16 lon: -132.7**

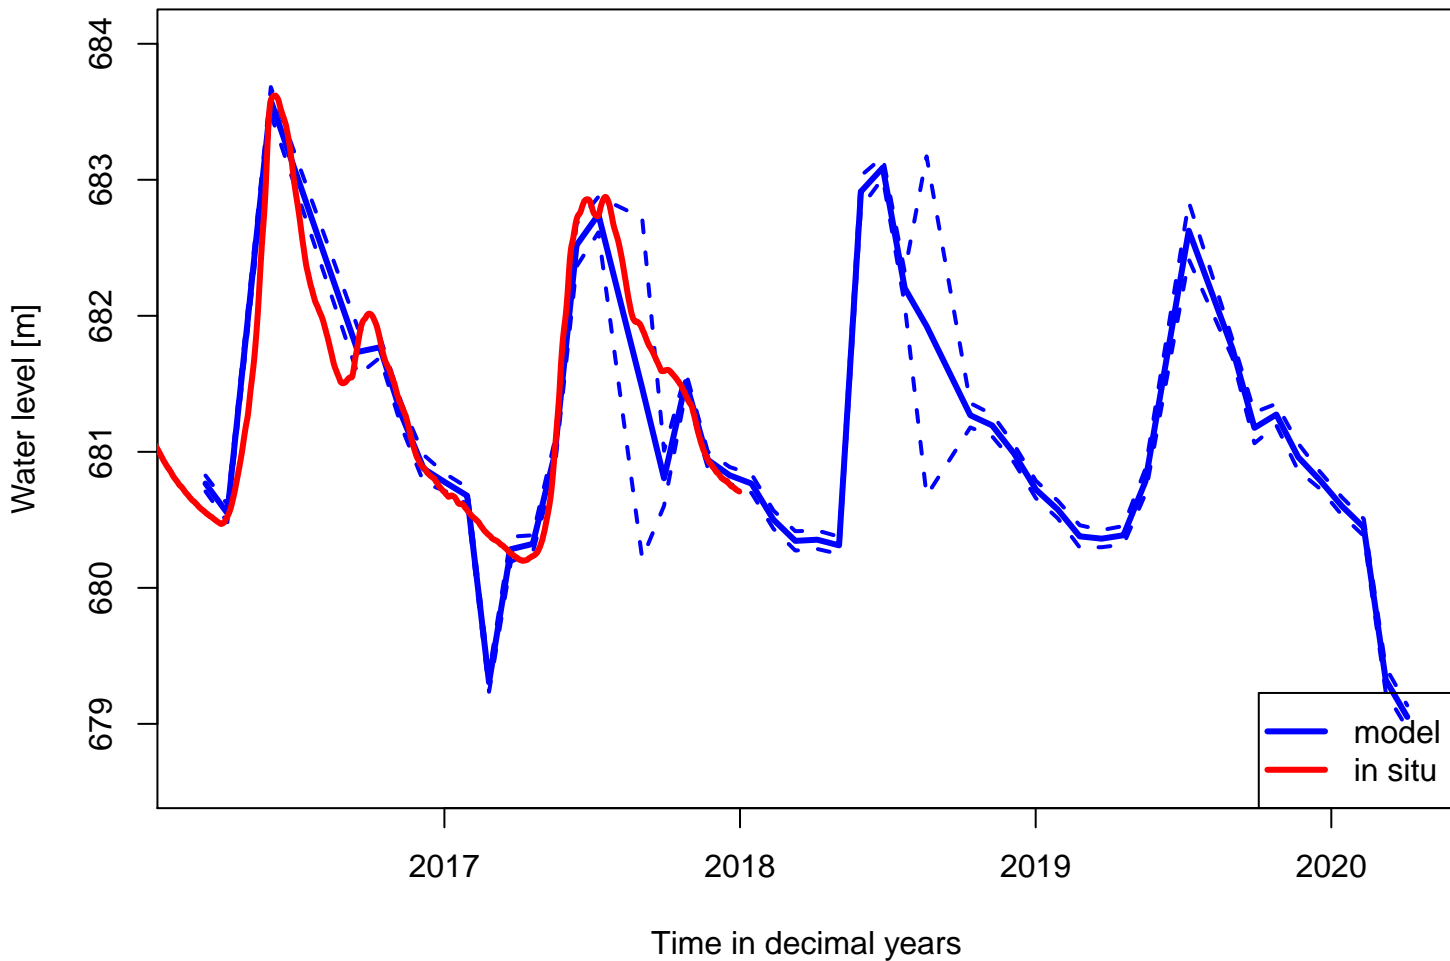

Supplement: s1 [file s1]

**lakename: Great Salt lakeid: 67 lat: 41.26 lon: -112.5**

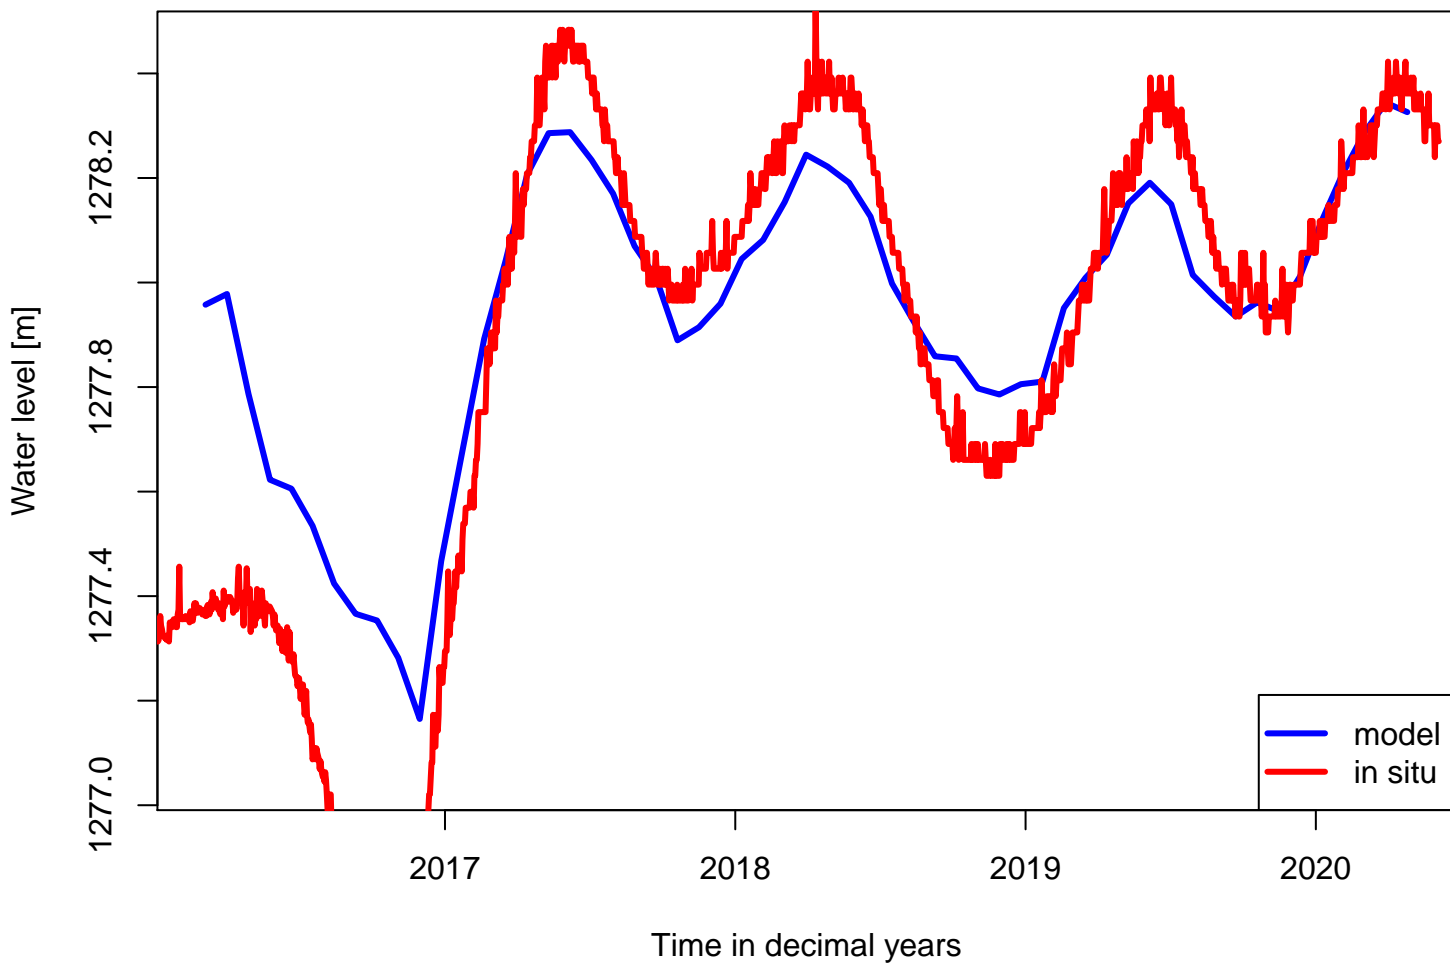

Supplement: s1 [file s1]

**lakename: Notigi Reservoir lakeid: 462 lat: 55.87 lon: -99.33**

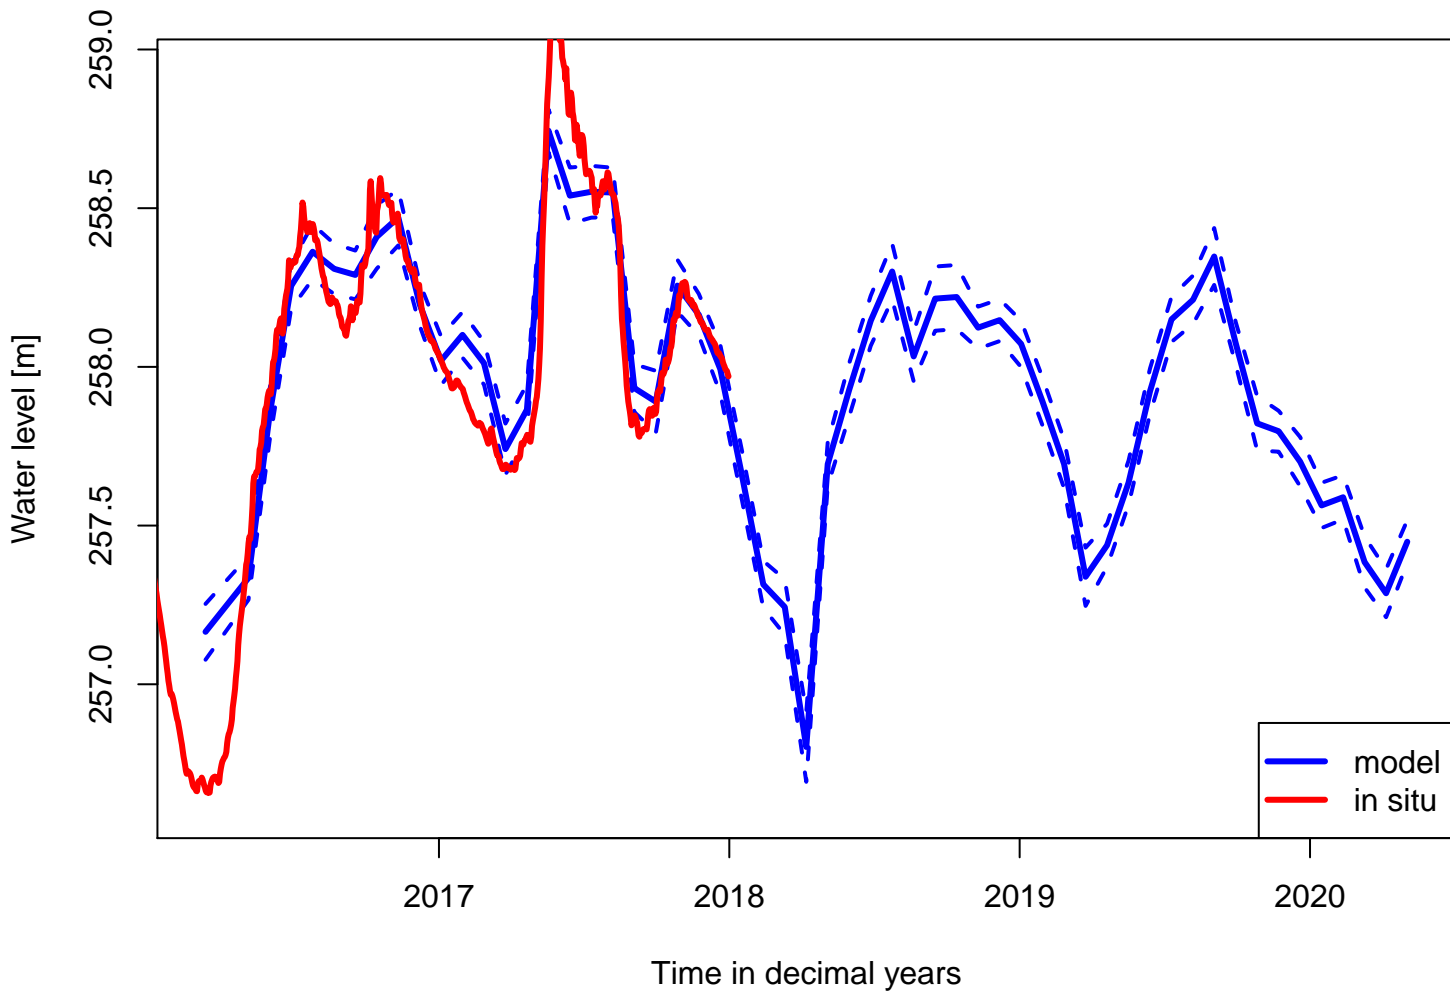

Supplement: s1 [file s1]

**lakename: lakeid: 6020 lat: 55.59 lon: -98.49**

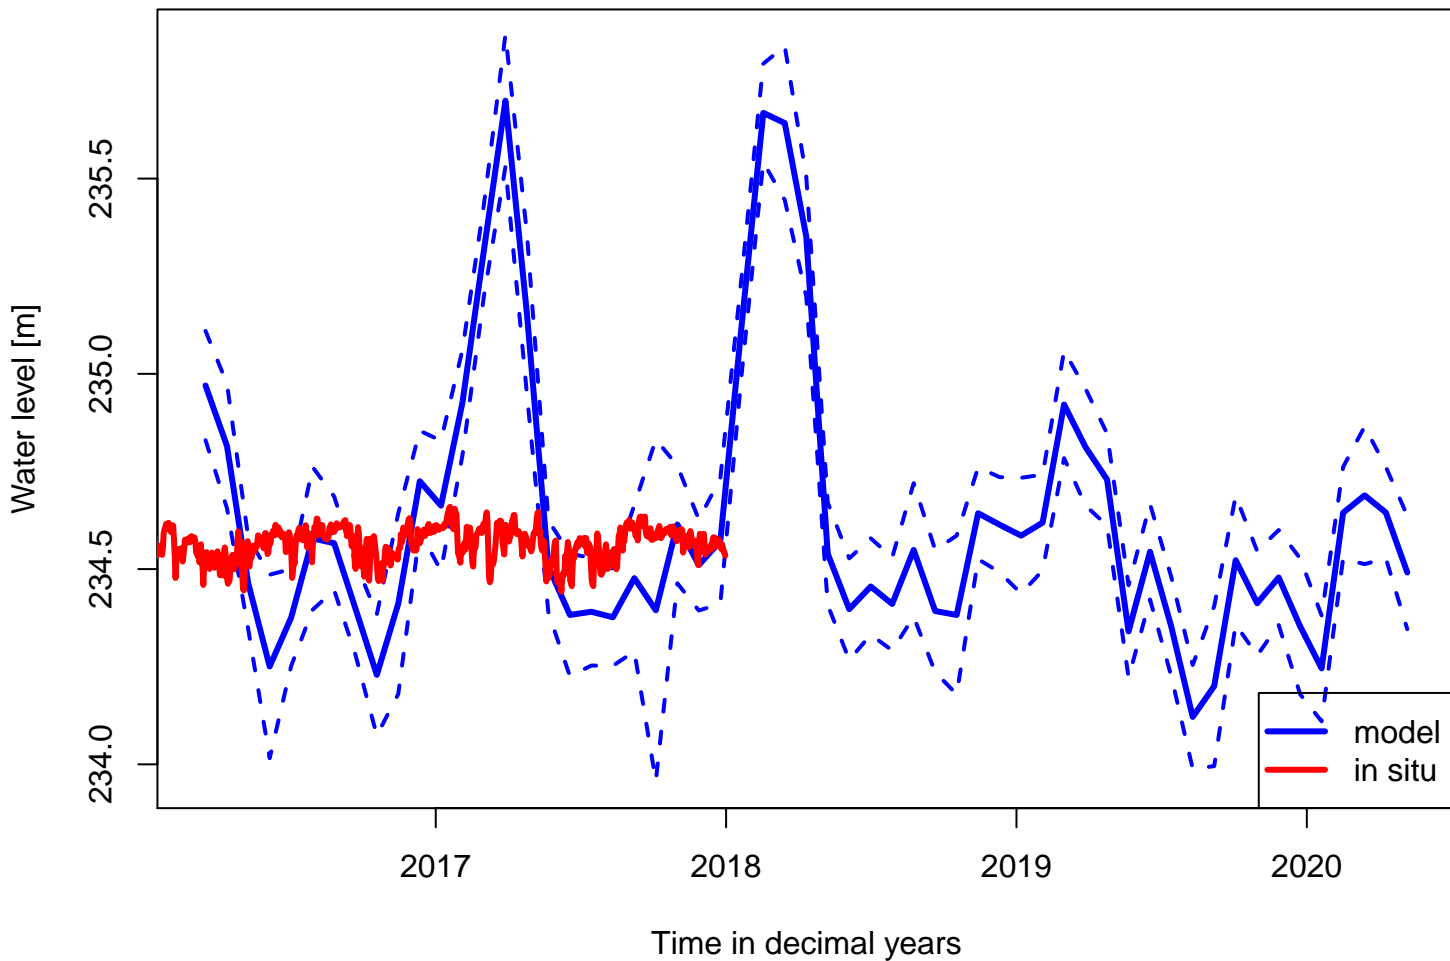

Supplement: s1 [file s1]

**lakename: Red Lake Reservoir lakeid: 61 lat: 47.96 lon: -95.28**

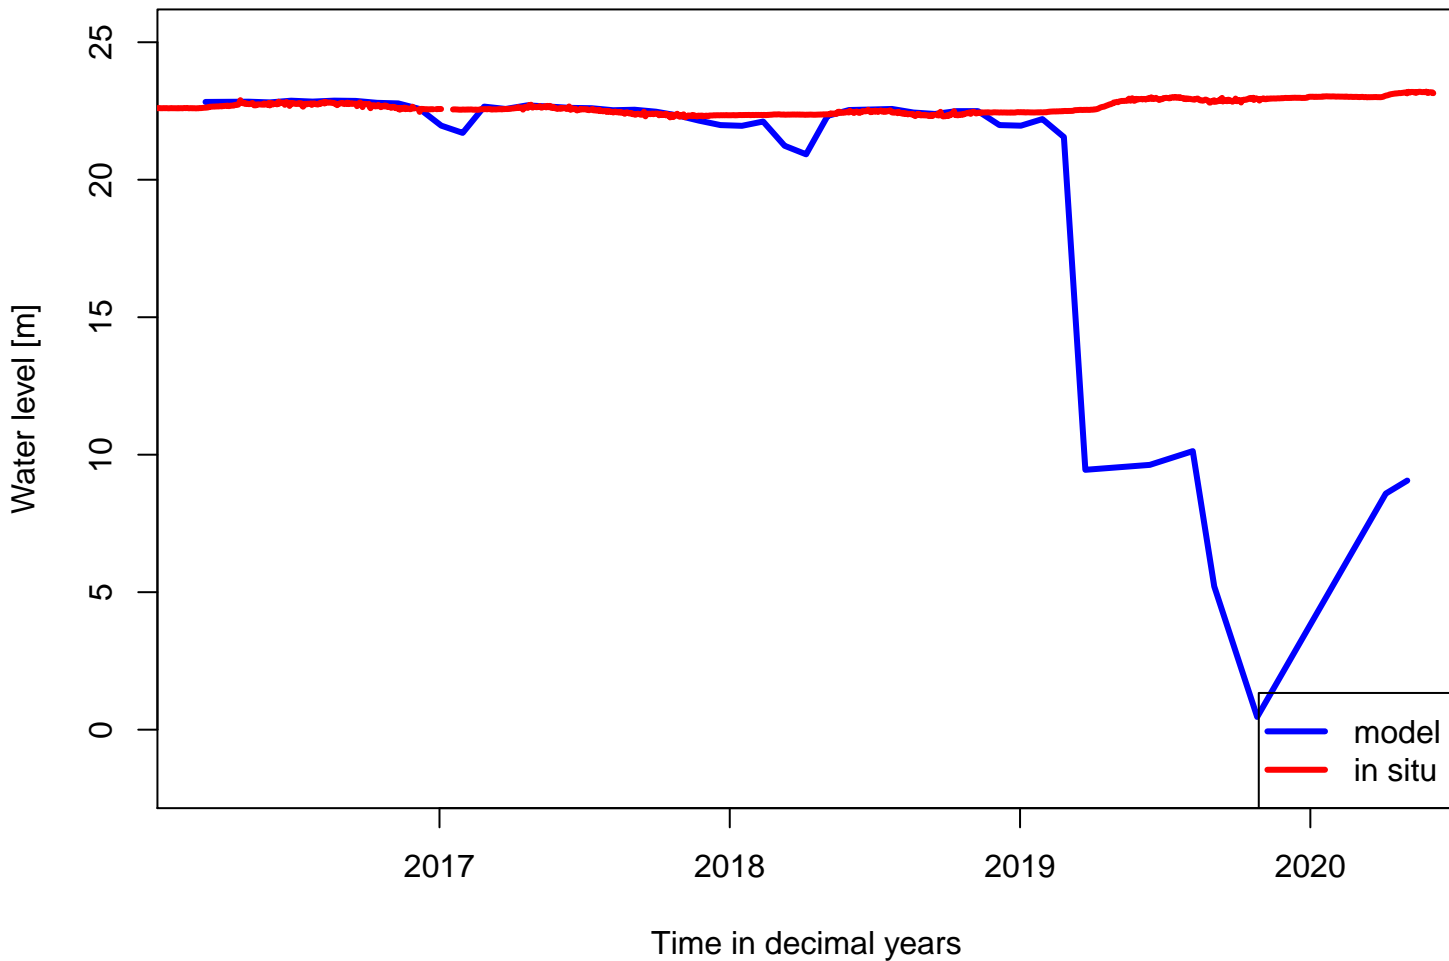

Supplement: s1 [file s1]

**lakename: Winnipegosis lakeid: 52 lat: 52.97 lon: -101**

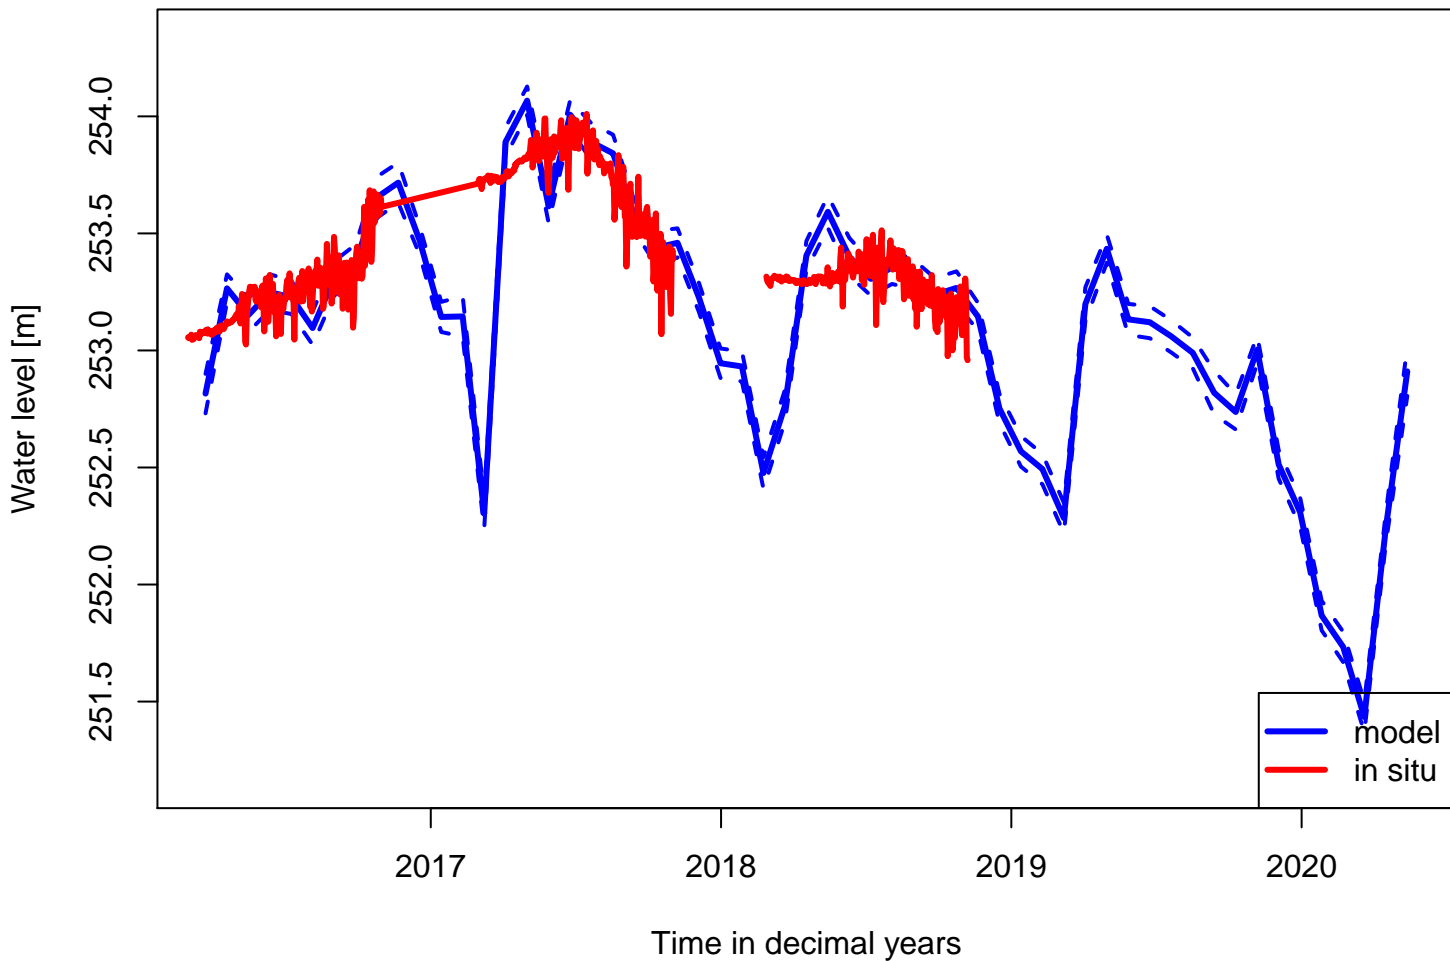

Supplement: s1 [file s1]

**lakename: Lake Winnepesaukee lakeid: 768 lat: 43.61 lon: -71.46**

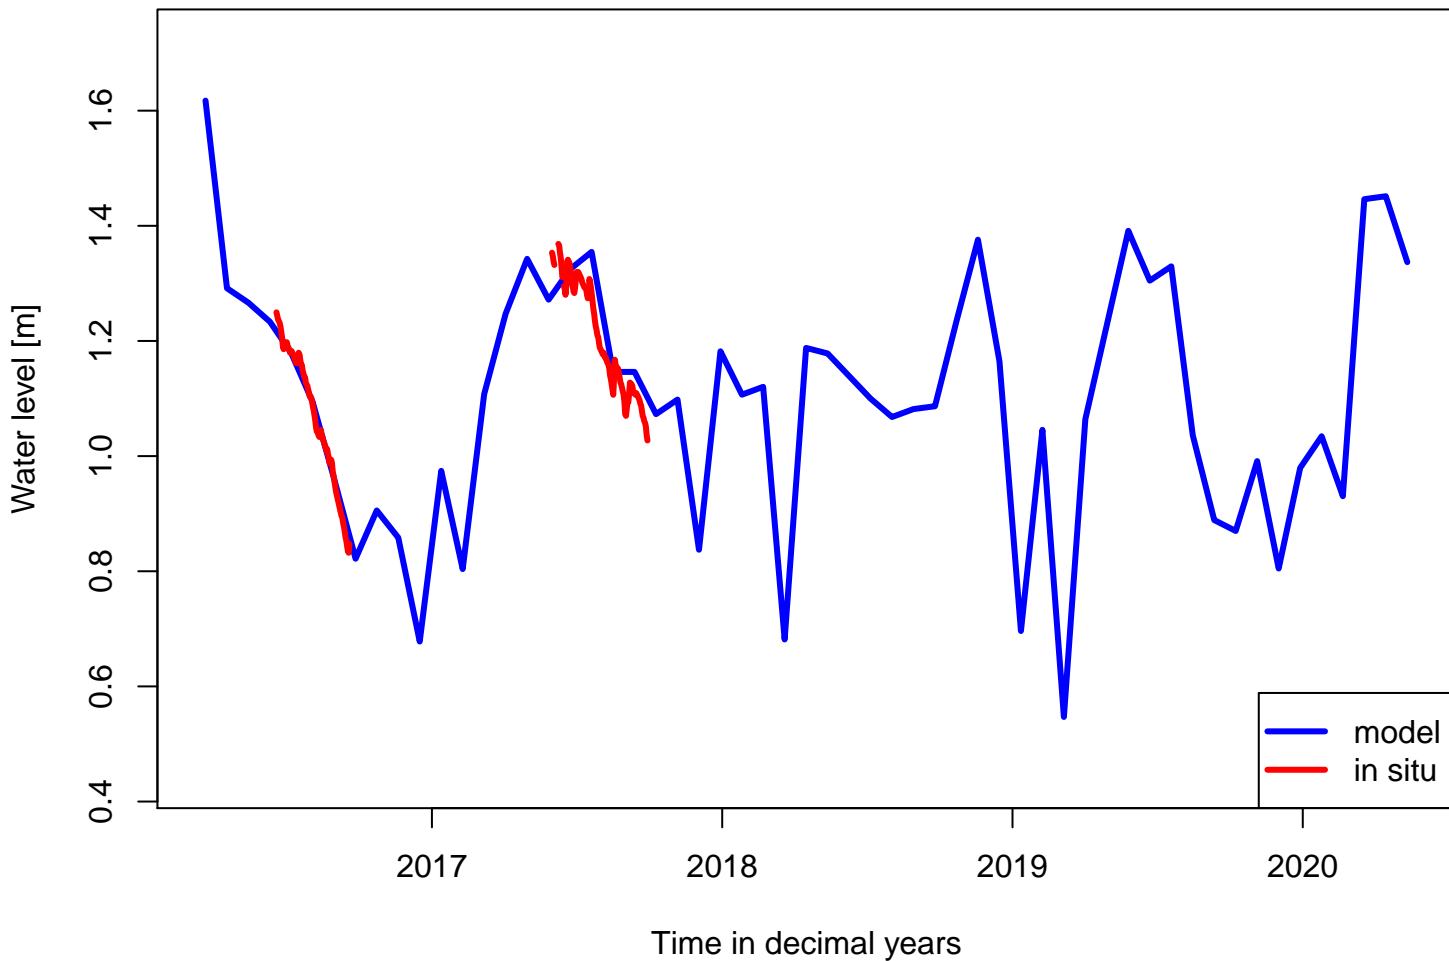

Supplement: s1 [file s1]

**lakename: lakeid: 8707 lat: 46.27 lon: -81.34**

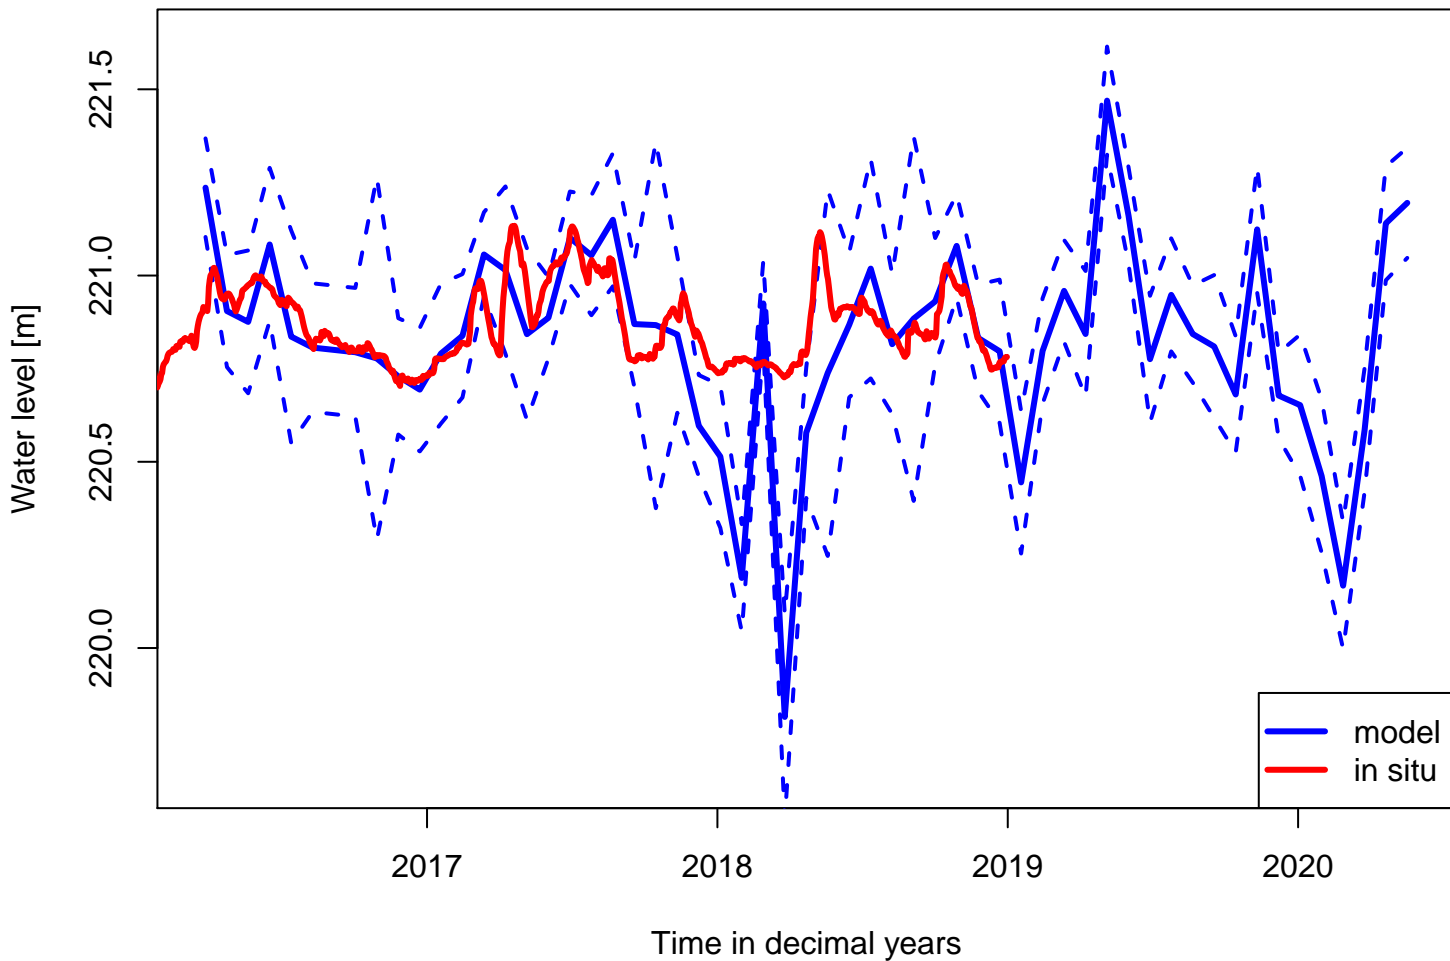

Supplement: s1 [file s1]

**lakename: Sipiwesk lakeid: 520 lat: 54.88 lon: -98.37**

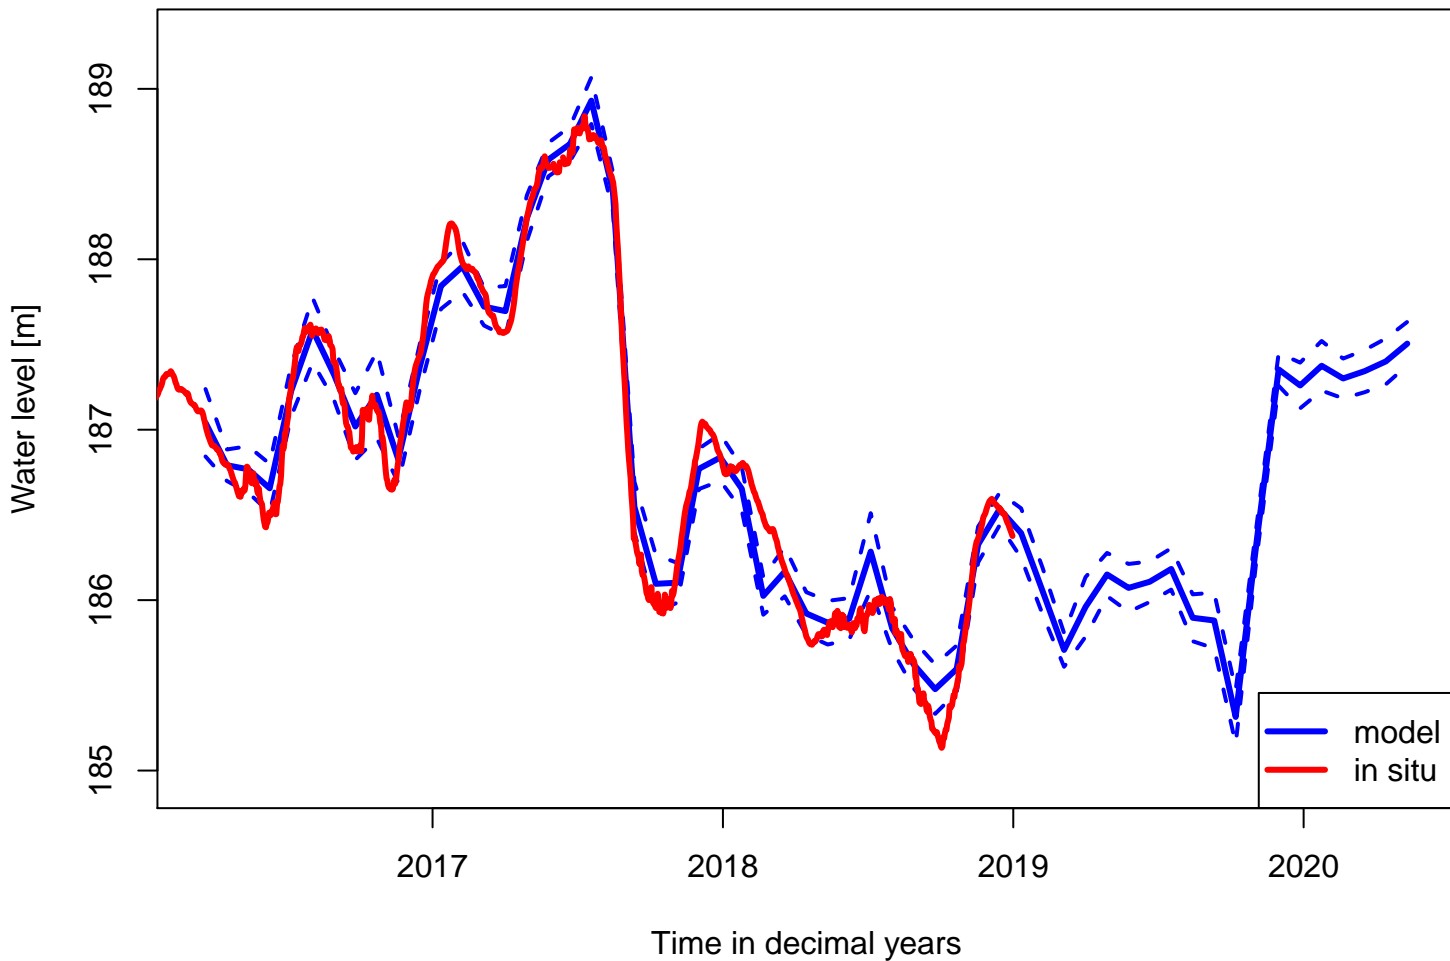

Supplement: s1 [file s1]

**lakename: Seul lakeid: 56 lat: 50.32 lon: -92.27**

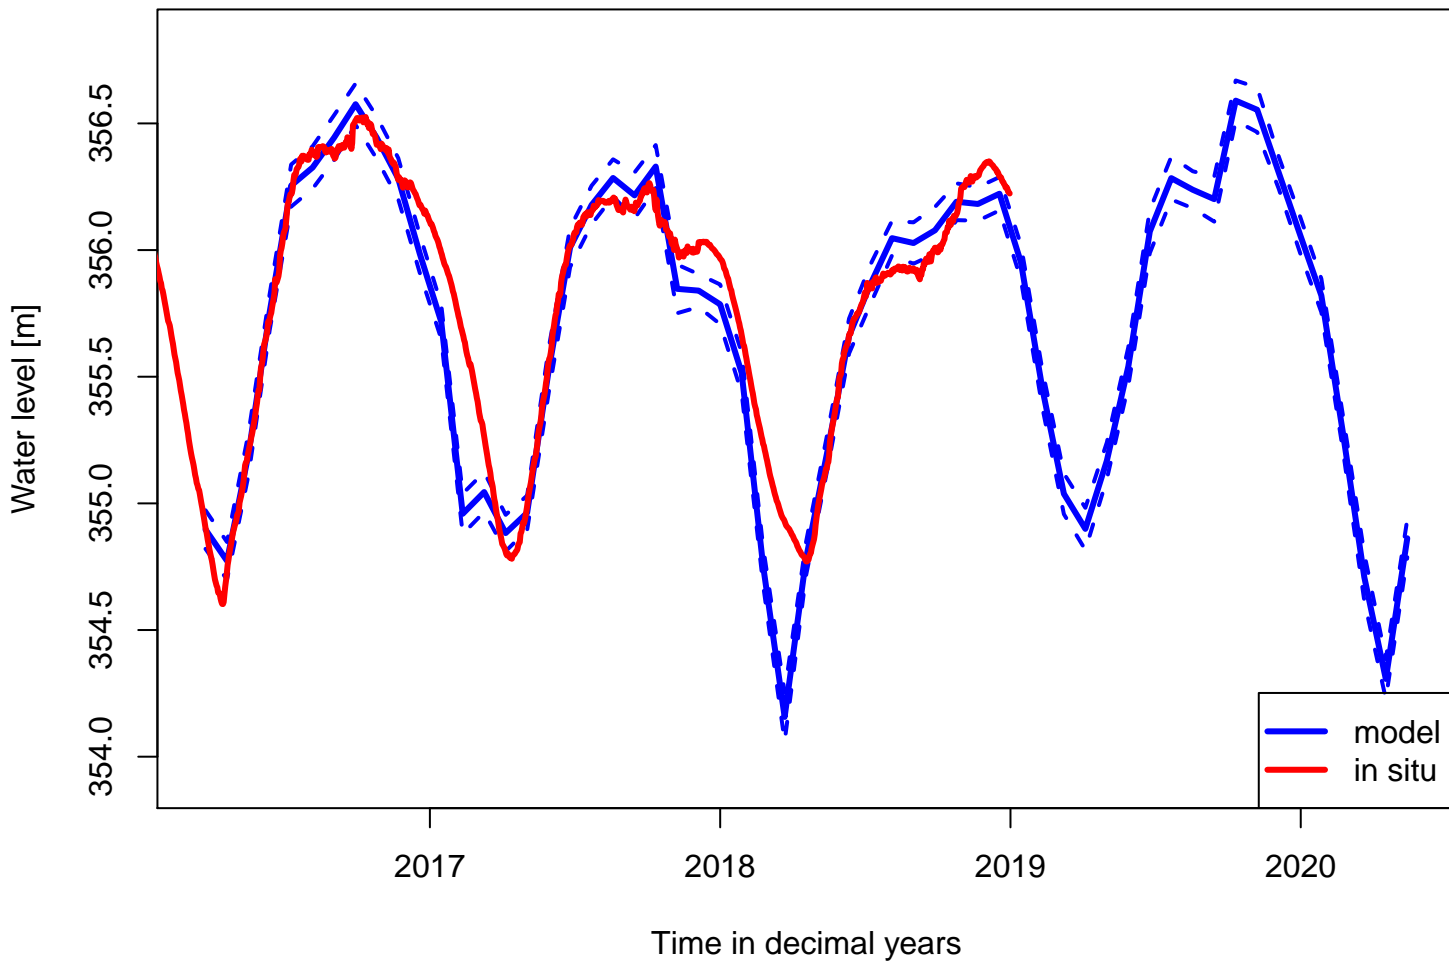

Supplement: s1 [file s1]

**lakename: Dauphin lakeid: 641 lat: 51.44 lon: -99.95**

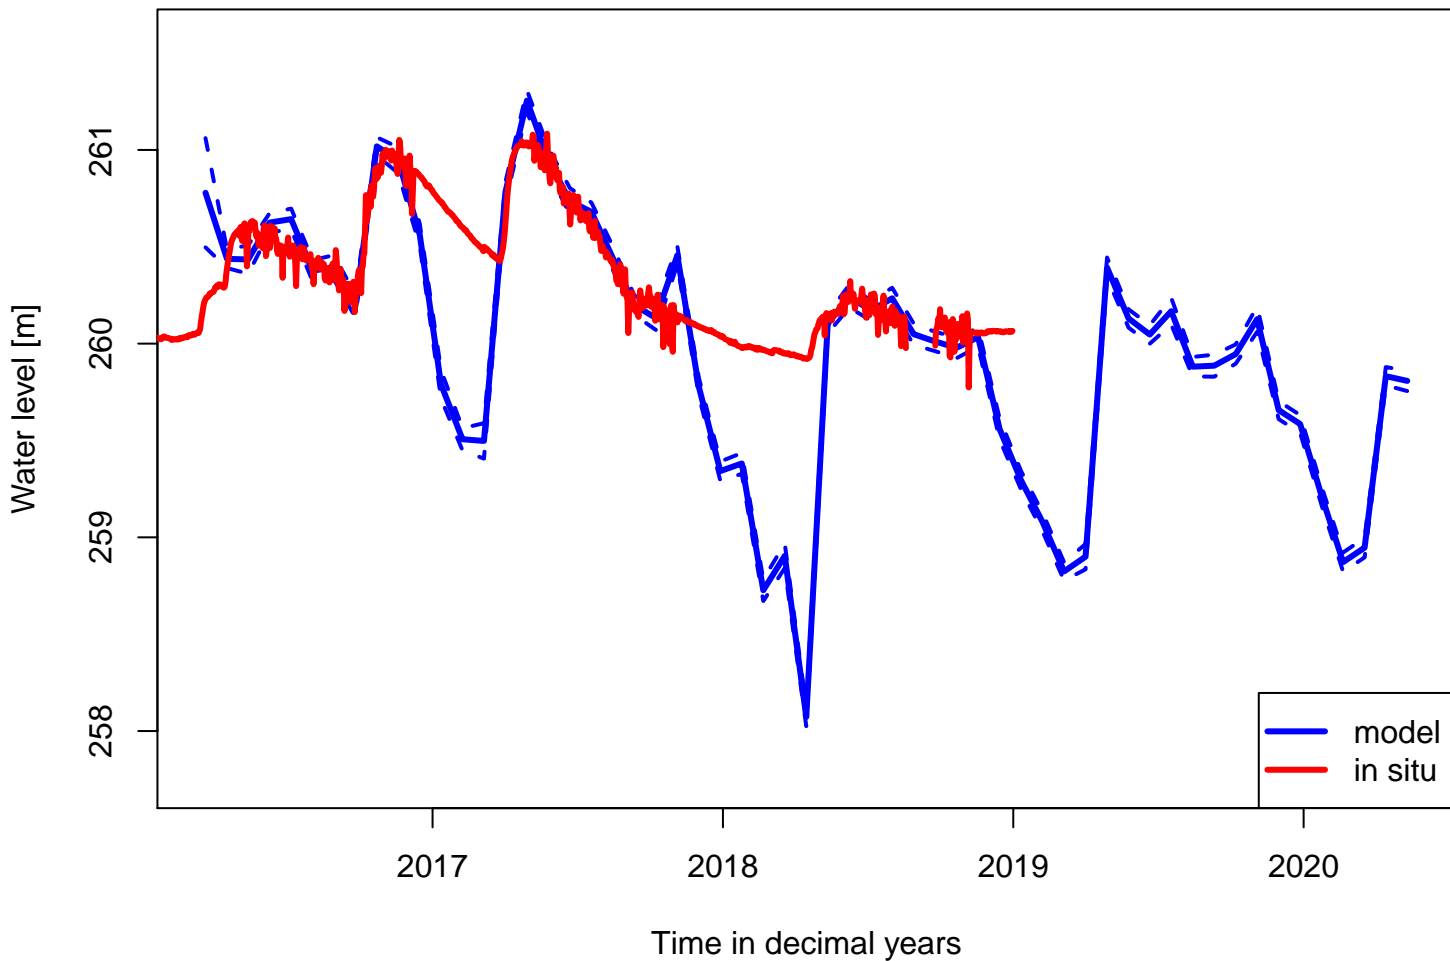

Supplement: s1 [file s1]

**lakename: Lake Whitney lakeid: 9492 lat: 31.87 lon: -97.37**

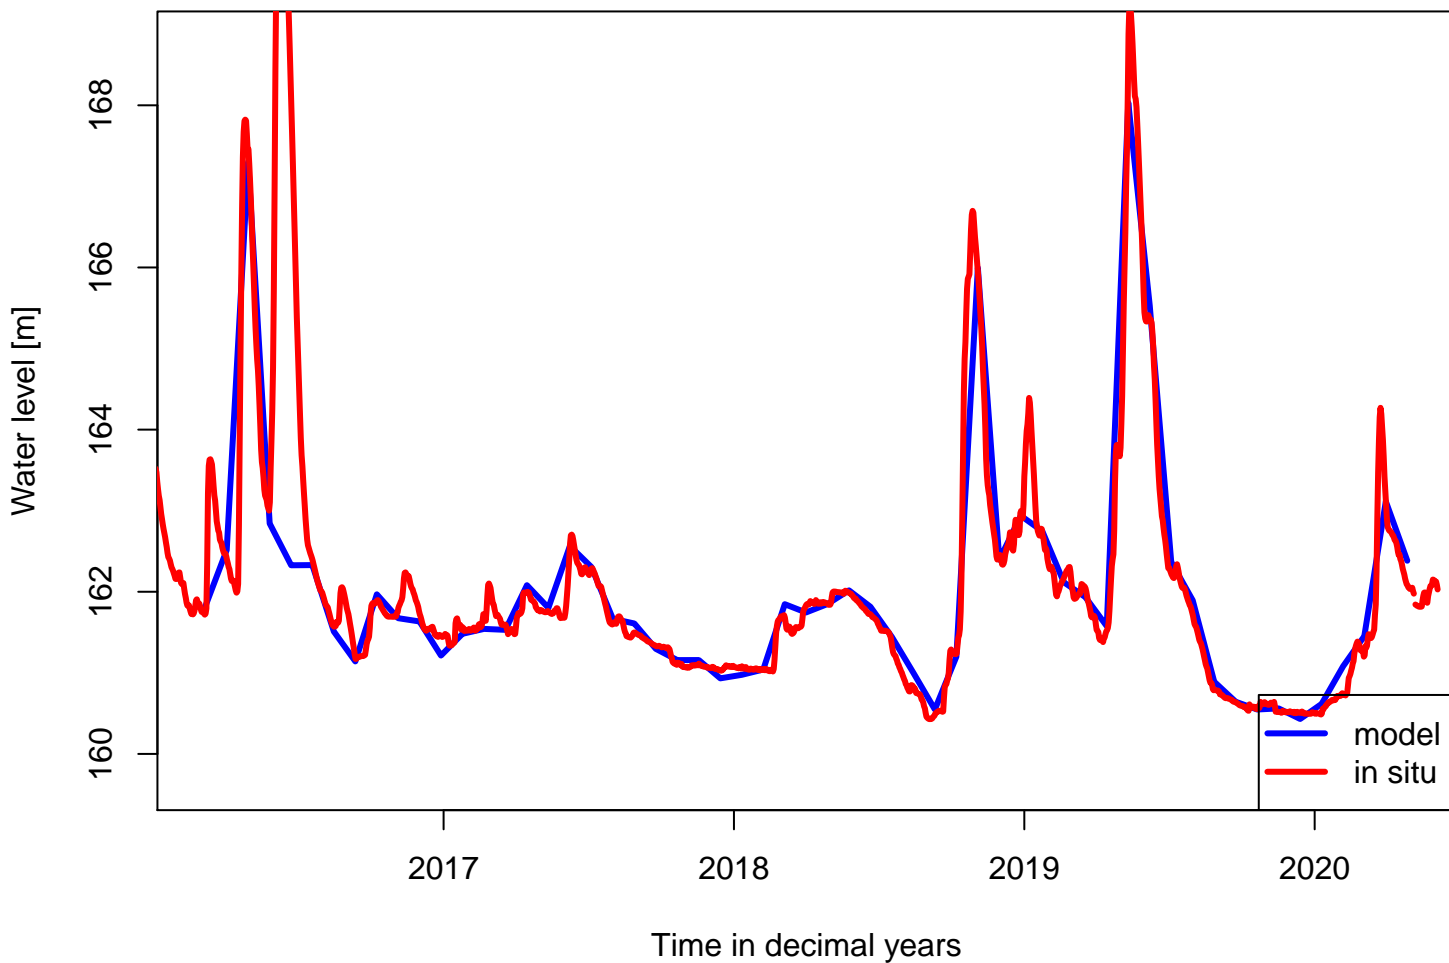

Supplement: s1 [file s1]

**lakename: Lewisville Lake lakeid: 9443 lat: 33.07 lon: -96.96**

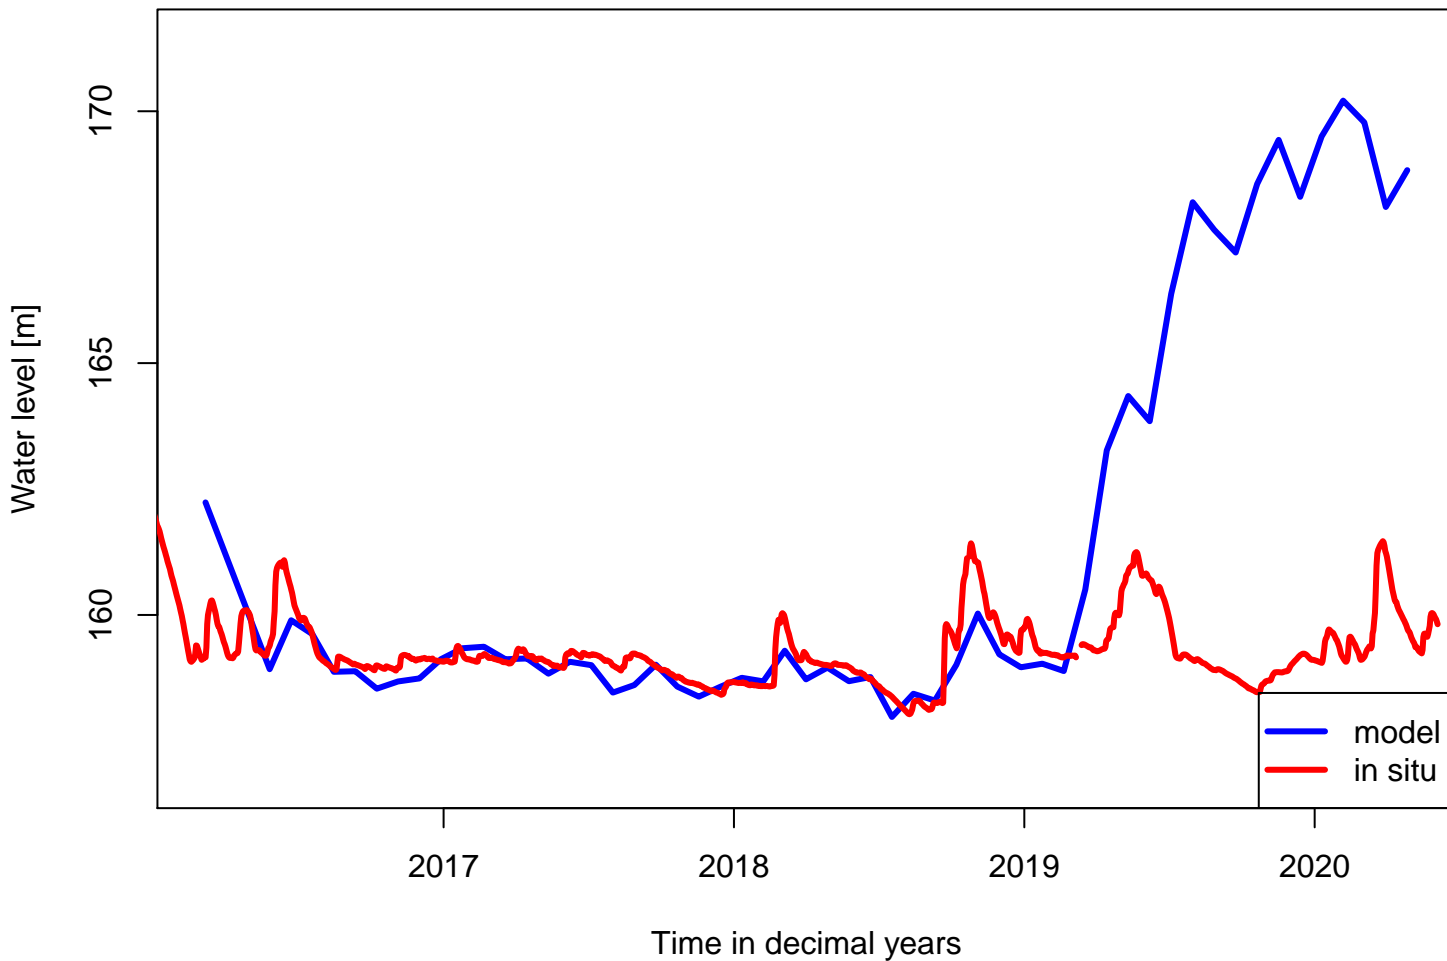

Supplement: s1 [file s1]

**lakename: Reindeer lakeid: 38 lat: 57.88 lon: -101.7**

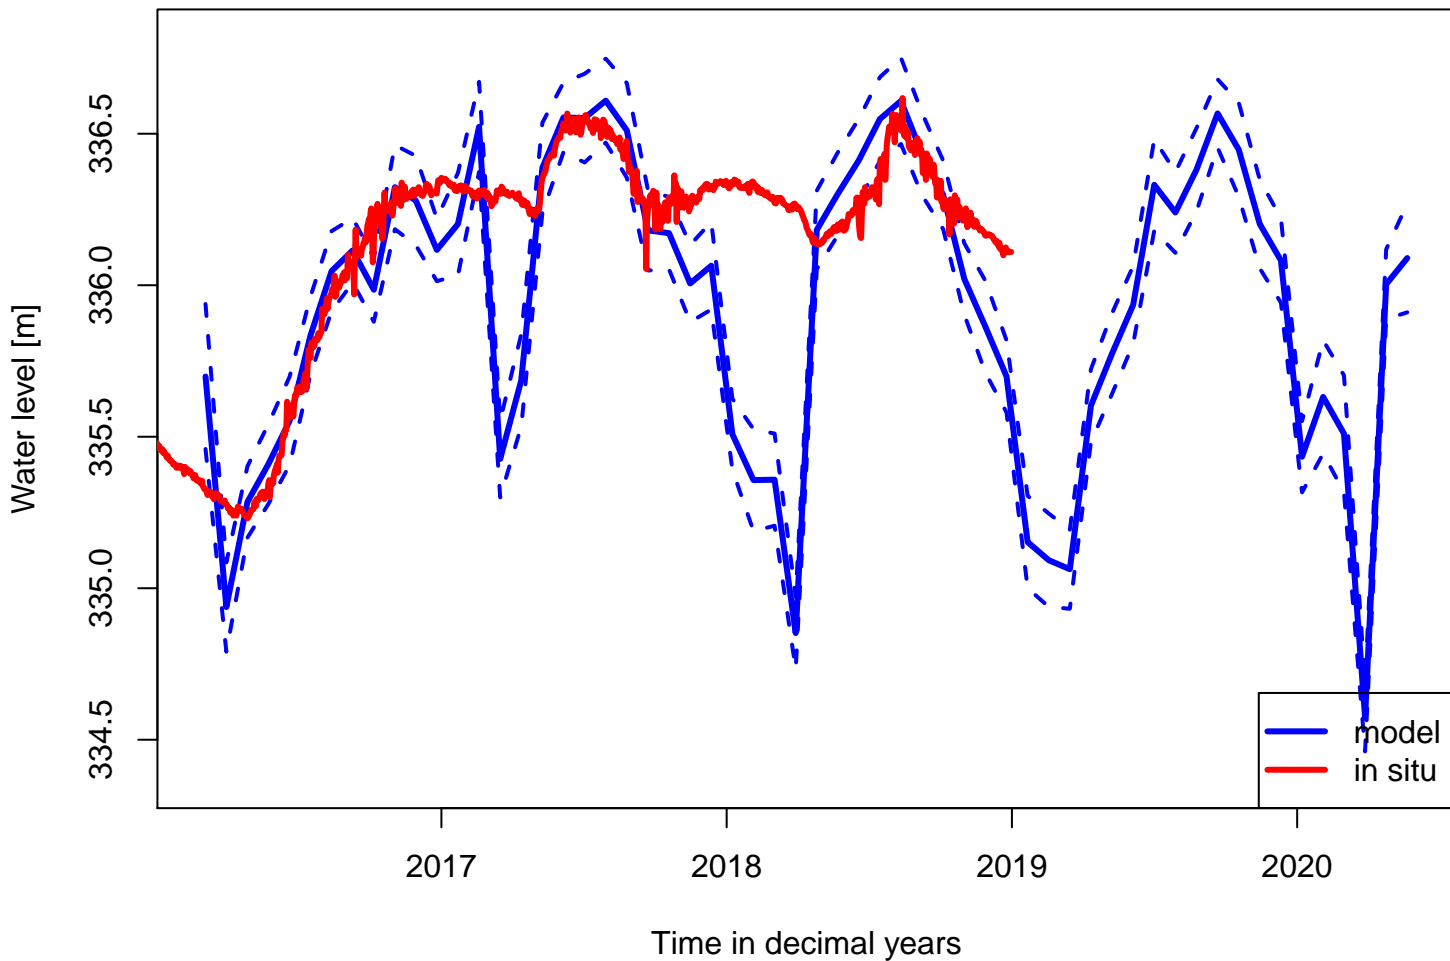

Supplement: s1 [file s1]

**lakename: Artillery lakeid: 327 lat: 62.89 lon: -108.5**

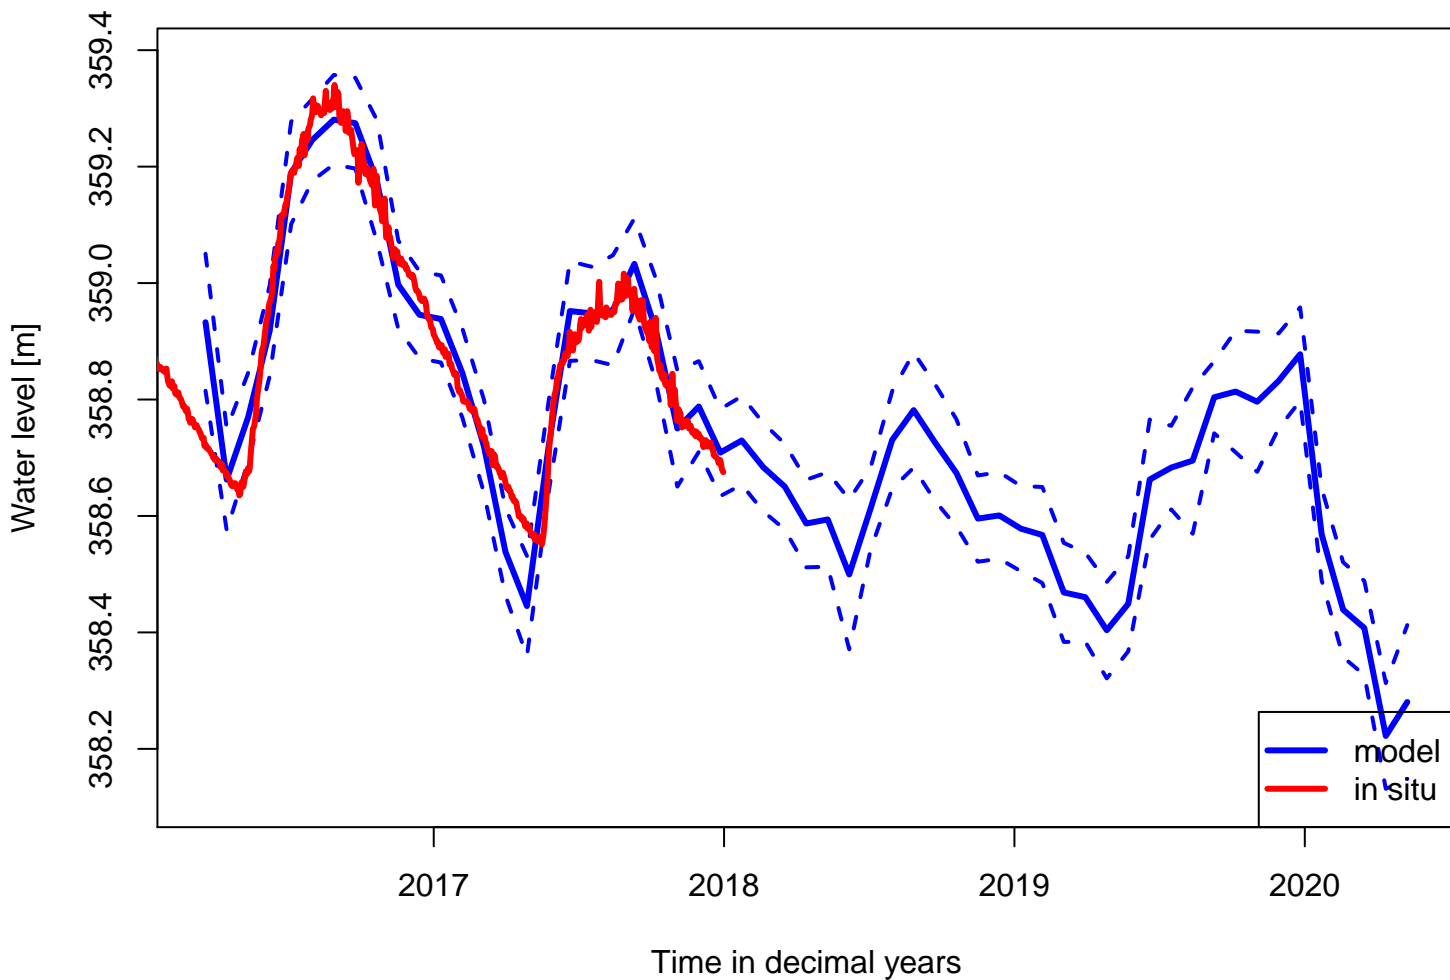

Supplement: s1 [file s1]

**lakename: Schultz lakeid: 273 lat: 64.78 lon: -97.05**

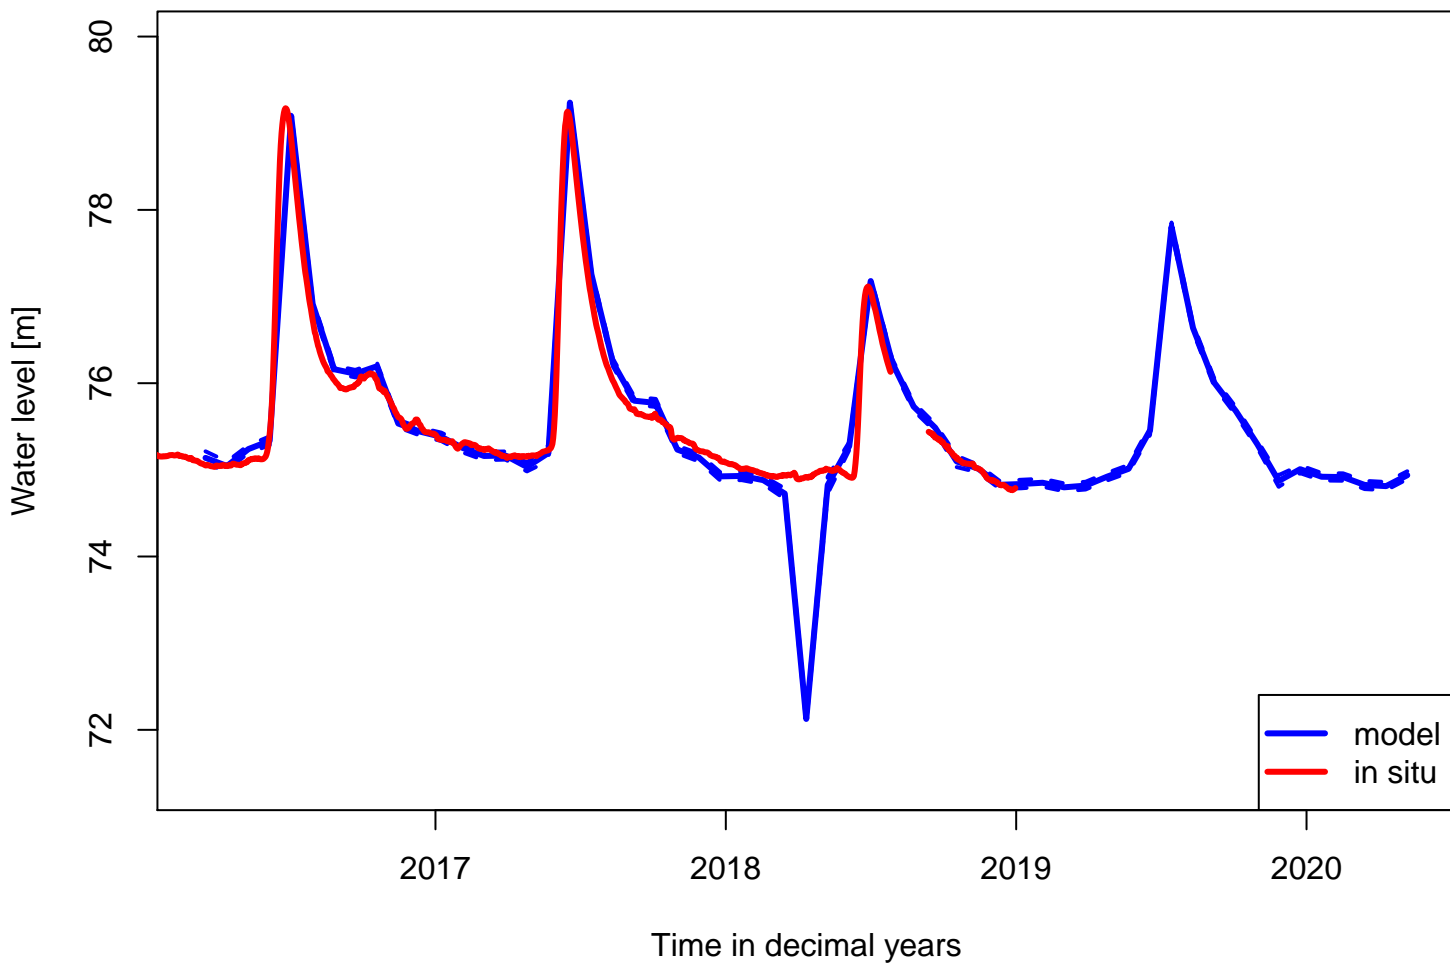

Supplement: s1 [file s1]

**lakename: lakeid: 616 lat: 52.67 lon: -93.99**

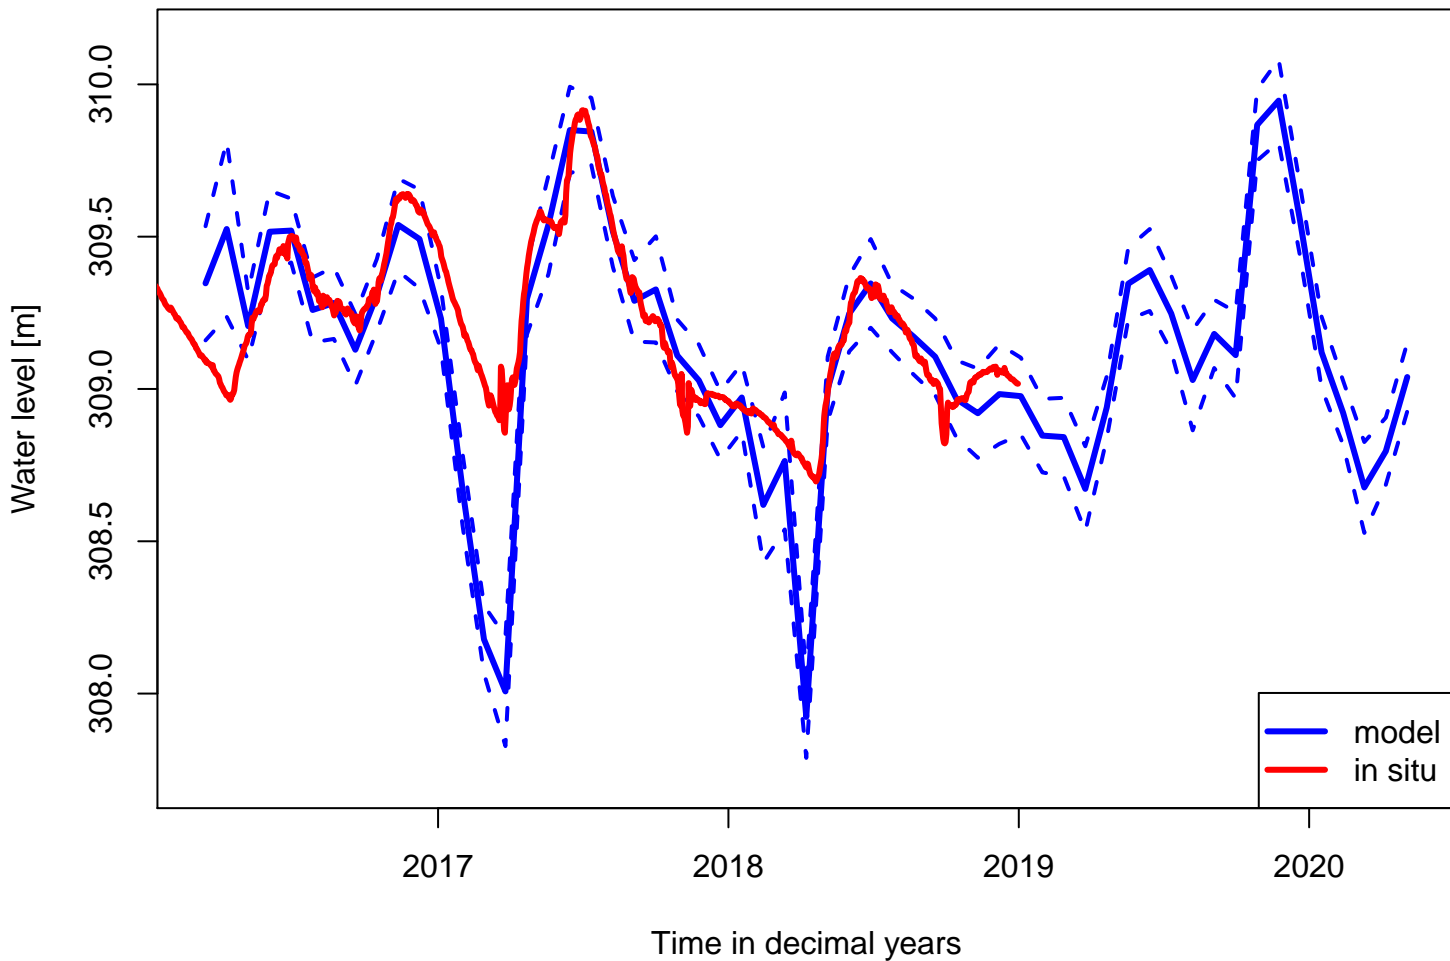

Supplement: s1 [file s1]

**lakename: Coeur d'Alene Lake lakeid: 729 lat: 47.67 lon: -116.8**

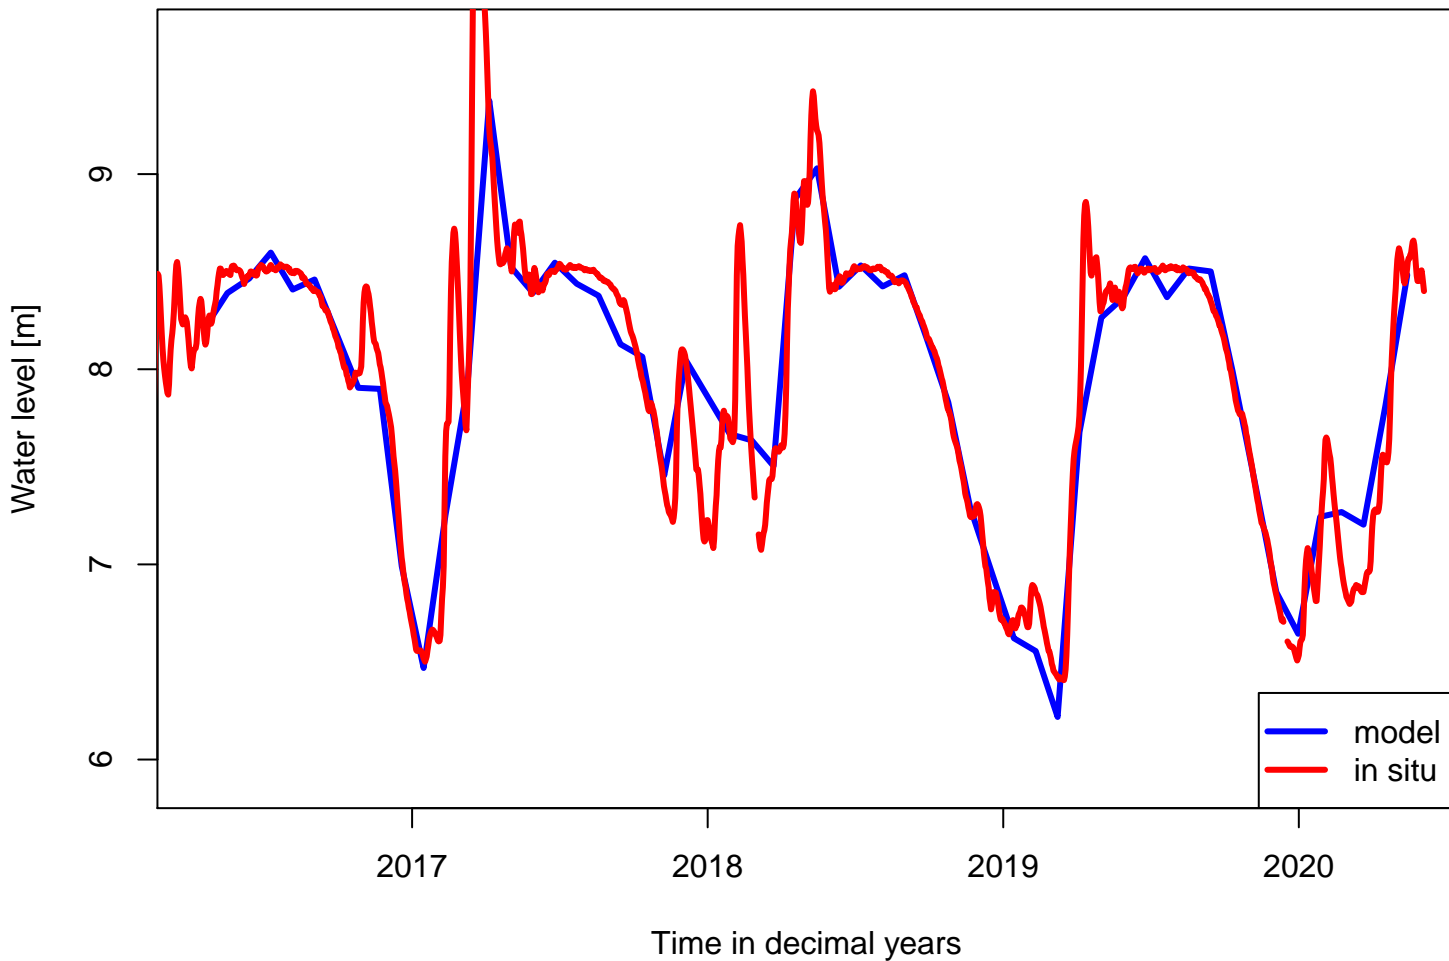

Supplement: s1 [file s1]

**lakename: Winnebago lakeid: 762 lat: 44.01 lon: -88.53**

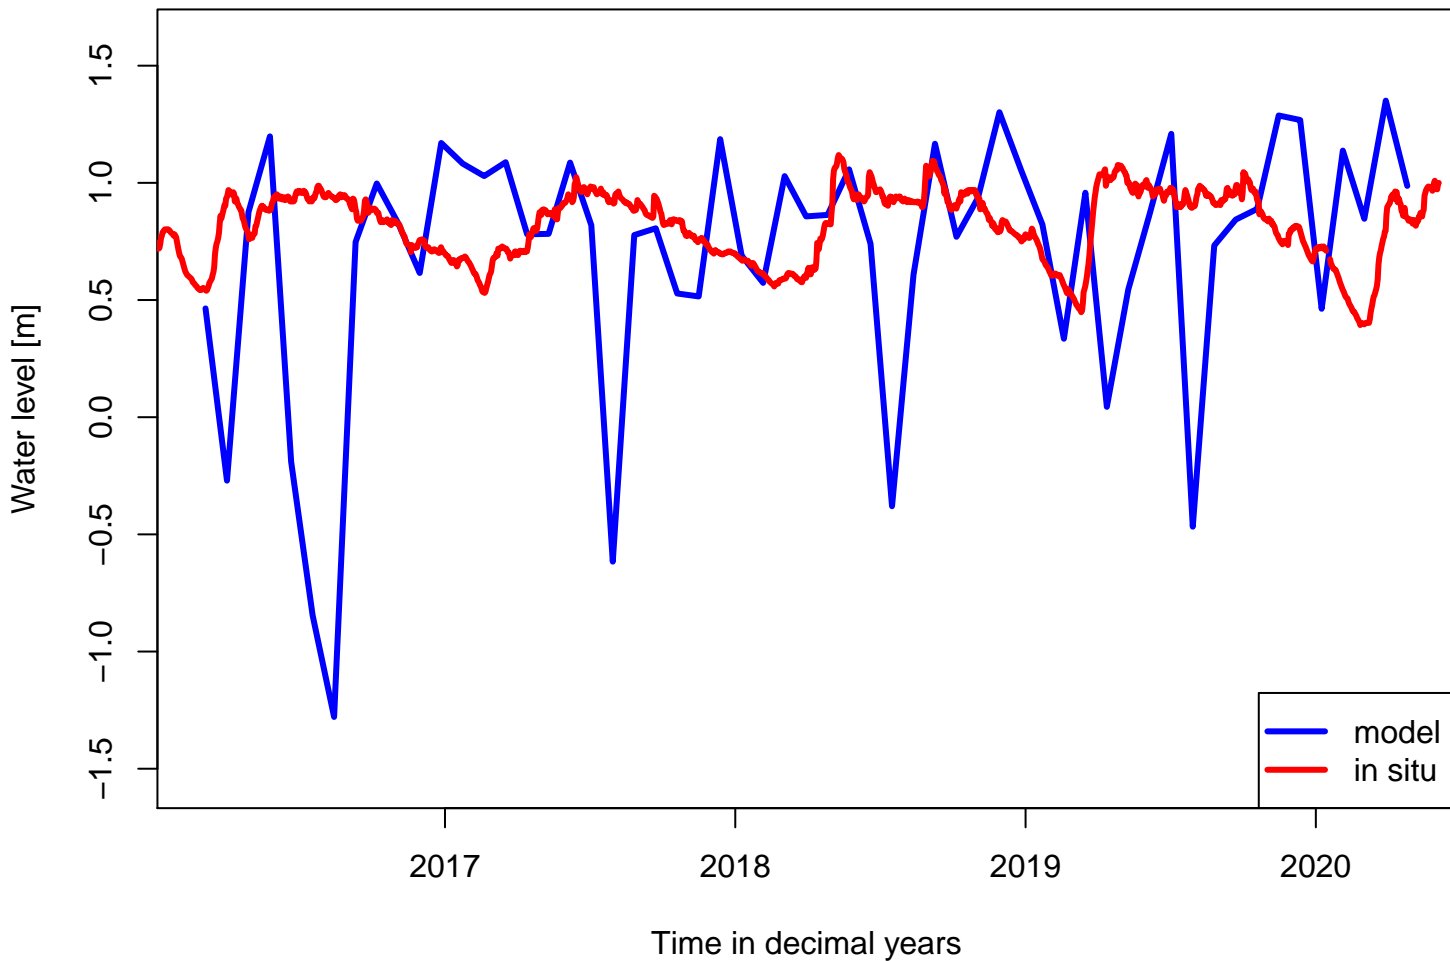

Supplement: s1 [file s1]

**lakename: Babine lakeid: 517 lat: 54.82 lon: -126.2**

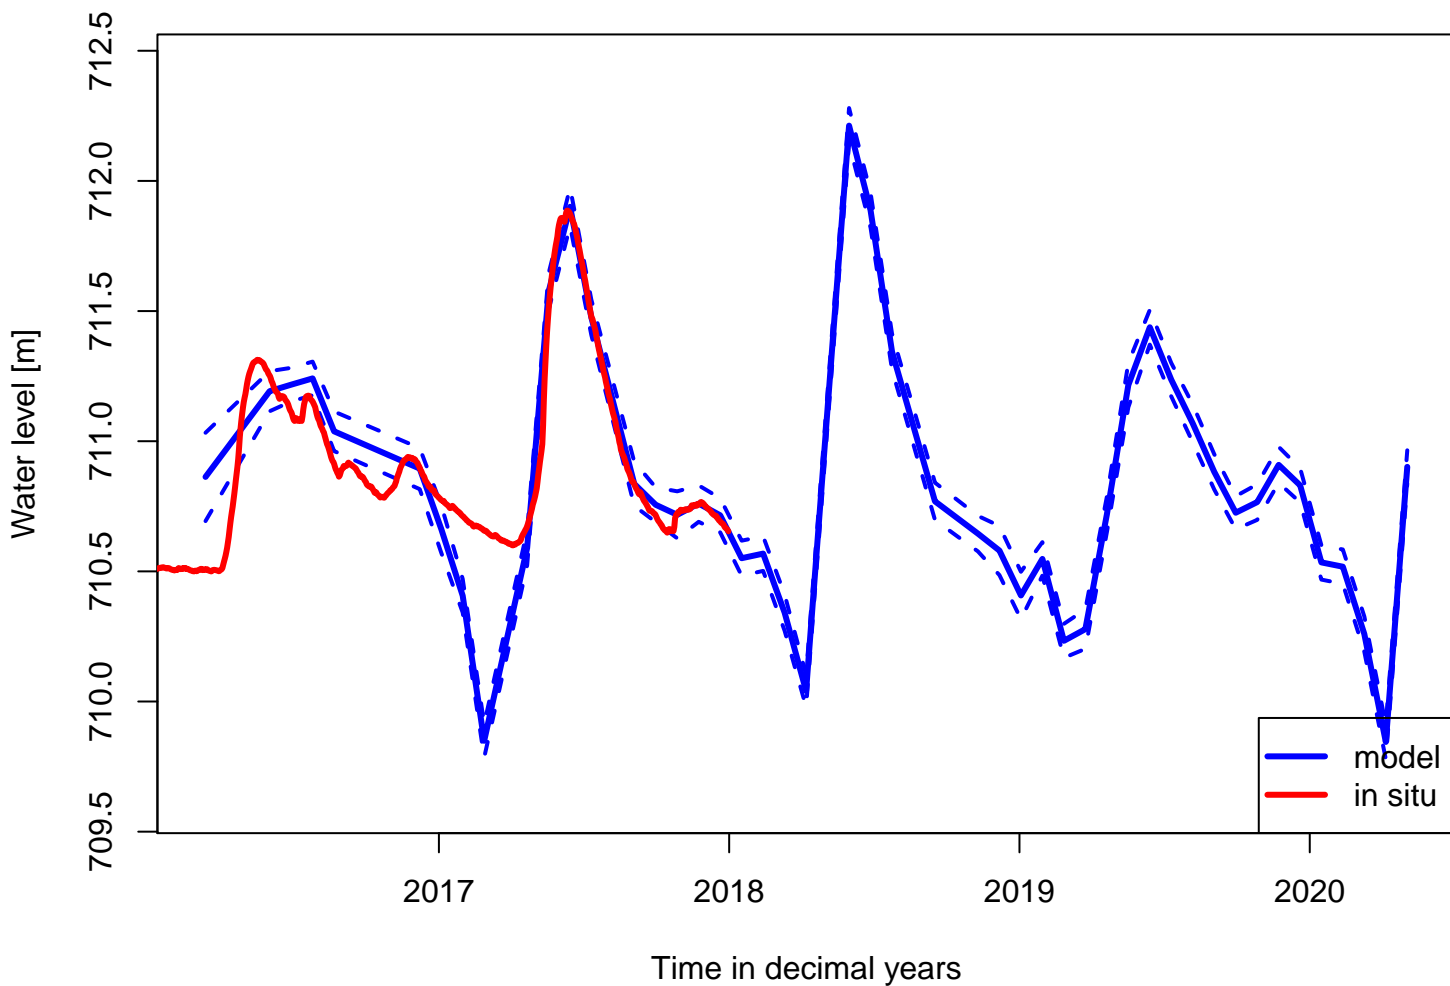

Supplement: s1 [file s1]

**lakename: Simcoe lakeid: 759 lat: 44.5 lon: -79.47**

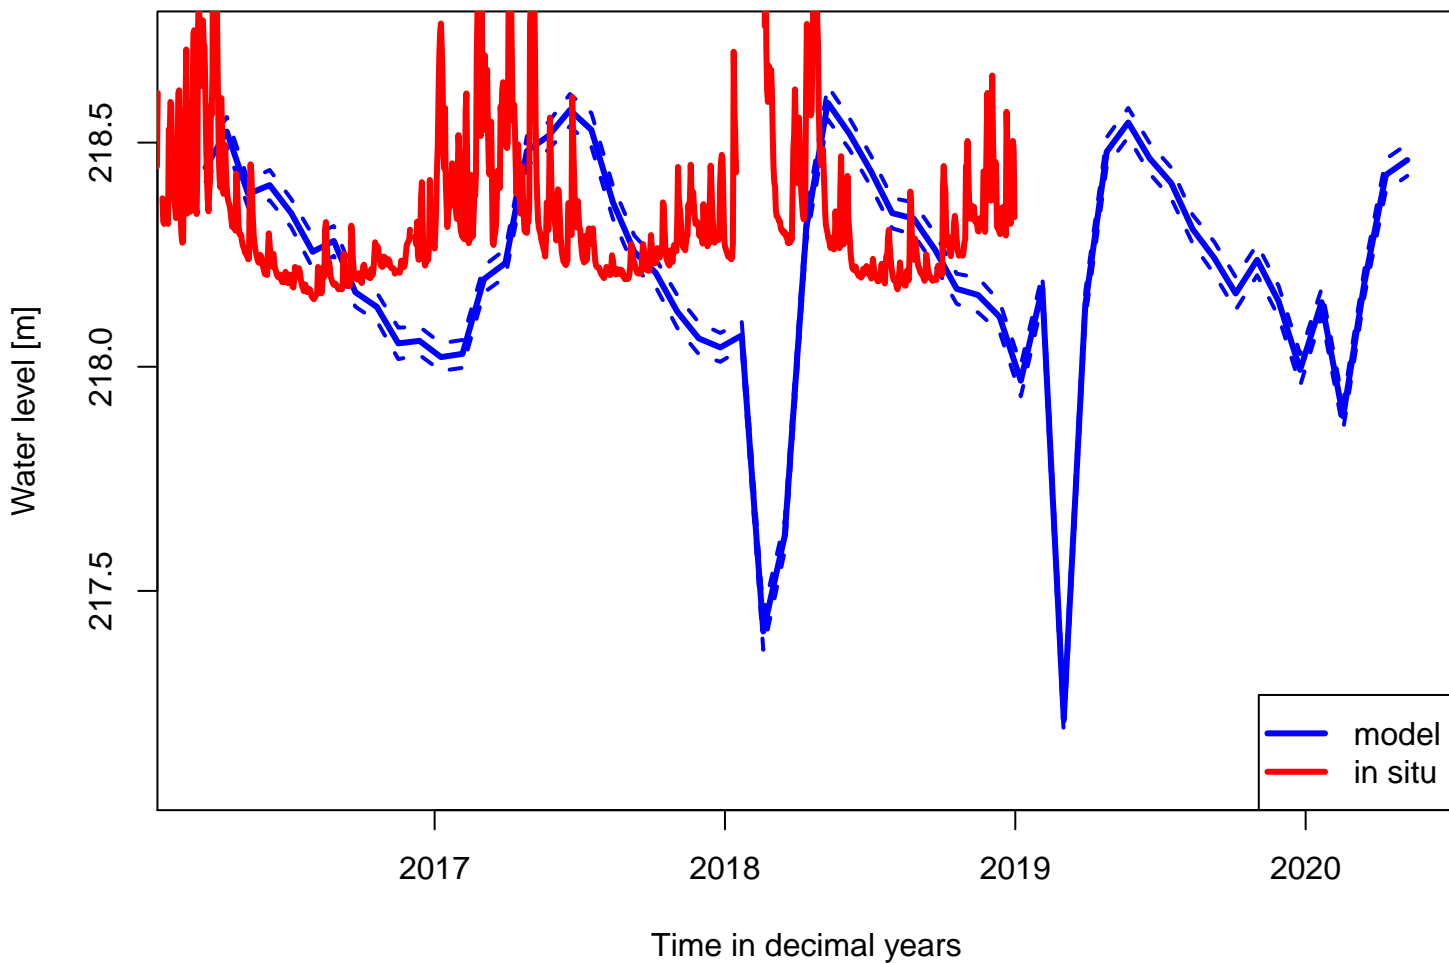

Supplement: s1 [file s1]

**lakename: J. Strom Thurmond Lake lakeid: 827 lat: 33.84 lon: -82.34**

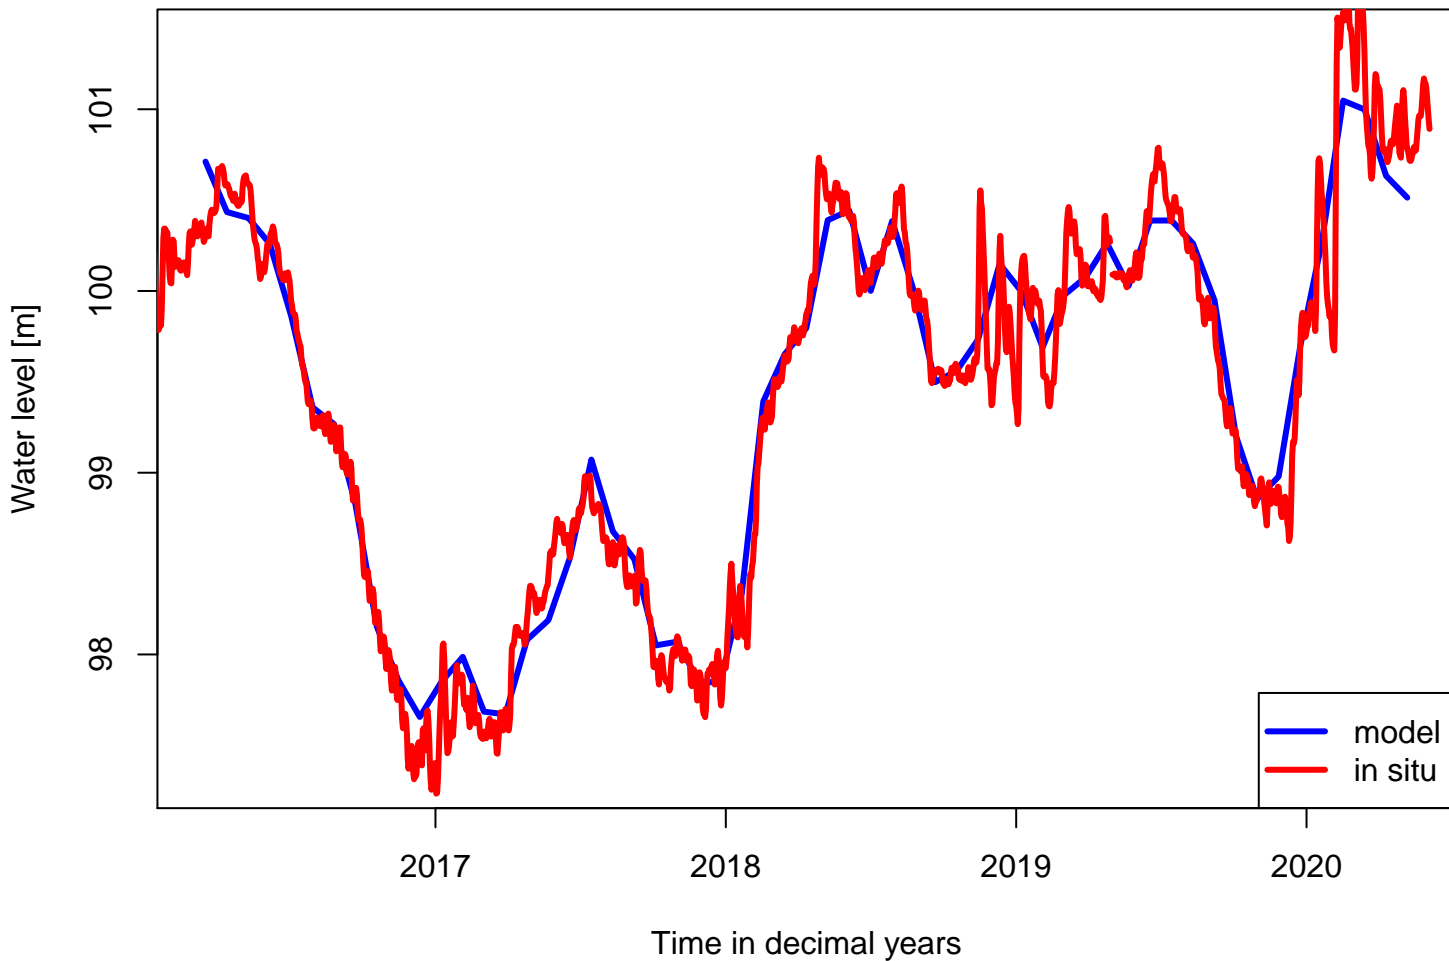

Supplement: s1 [file s1]

**lakename: Richard B. Russell Lake lakeid: 9410 lat: 34.1 lon: -82.62**

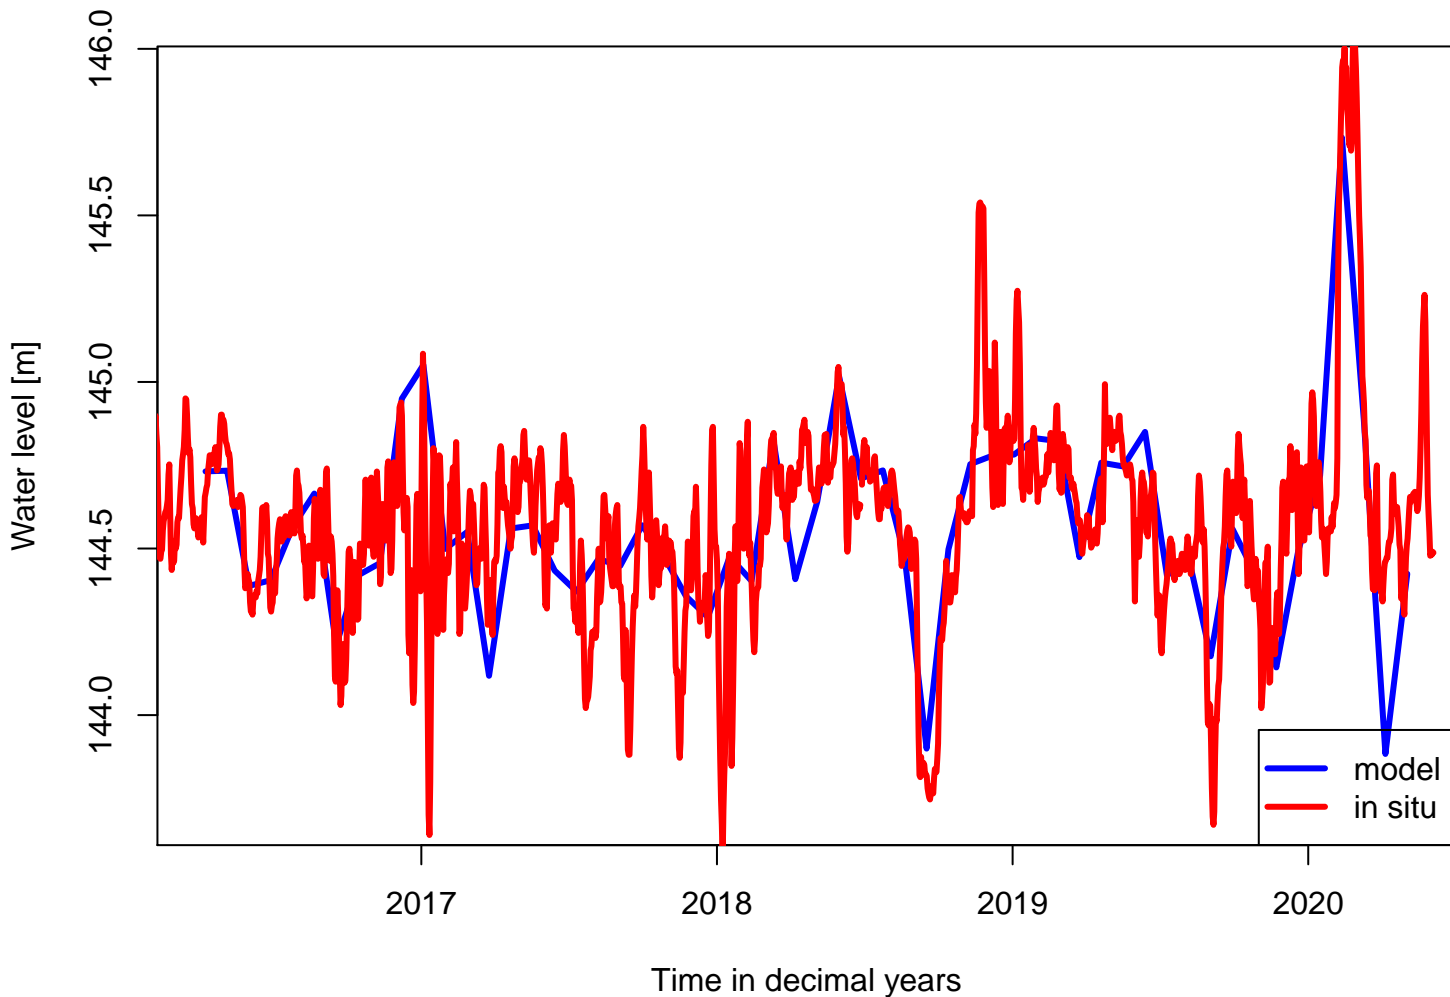

Supplement: s1 [file s1]

**lakename: Candle lakeid: 586 lat: 53.77 lon: -105.3**

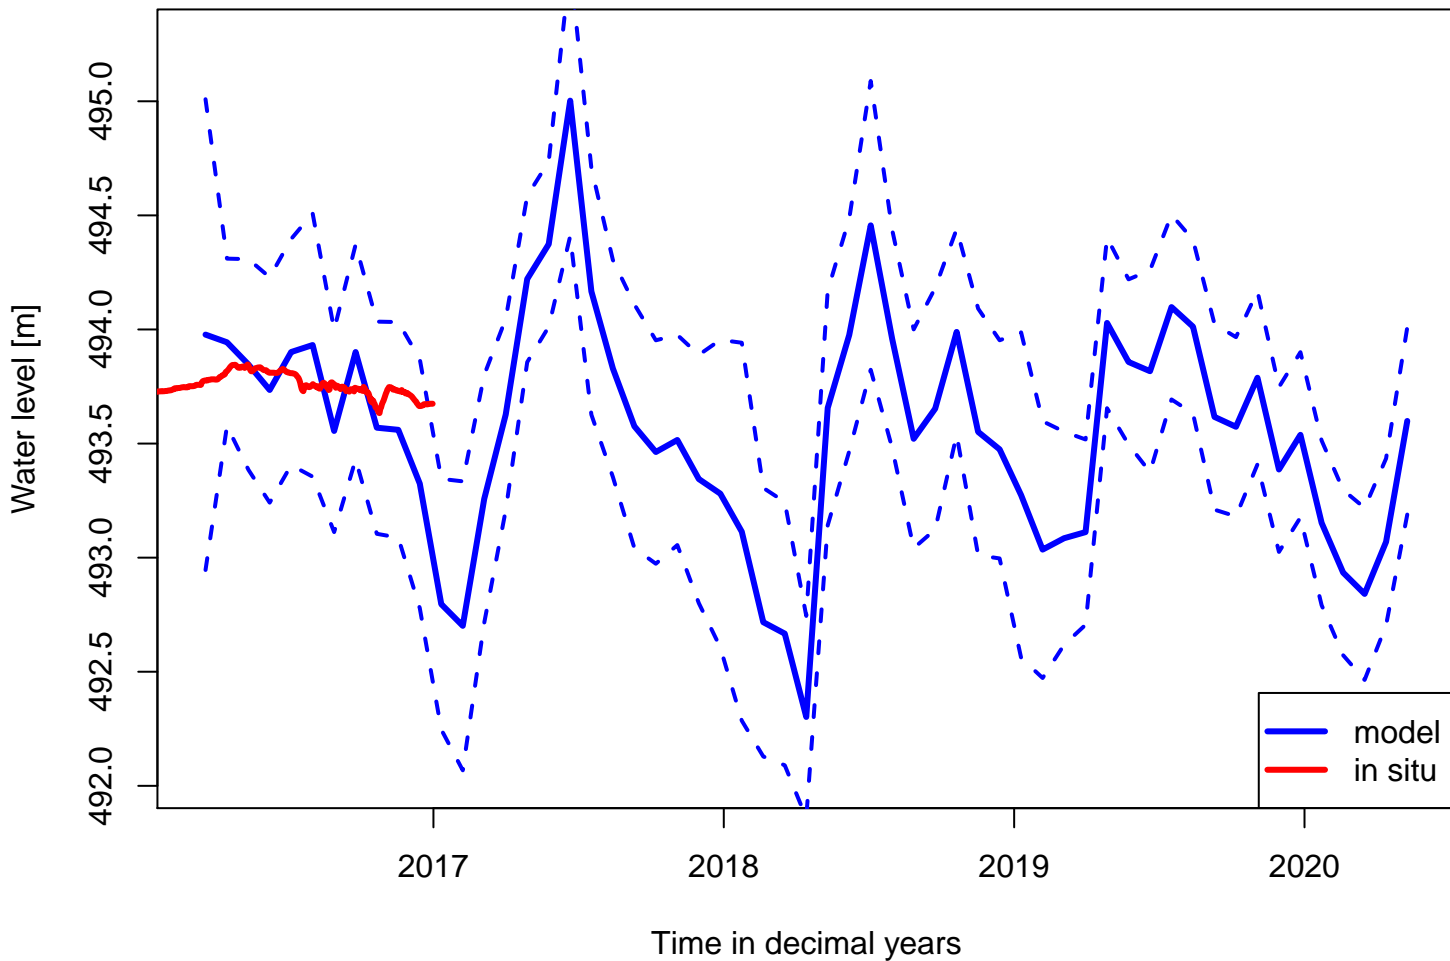

Supplement: s1 [file s1]

**lakename: Kootenay lakeid: 696 lat: 49.3 lon: -116.7**

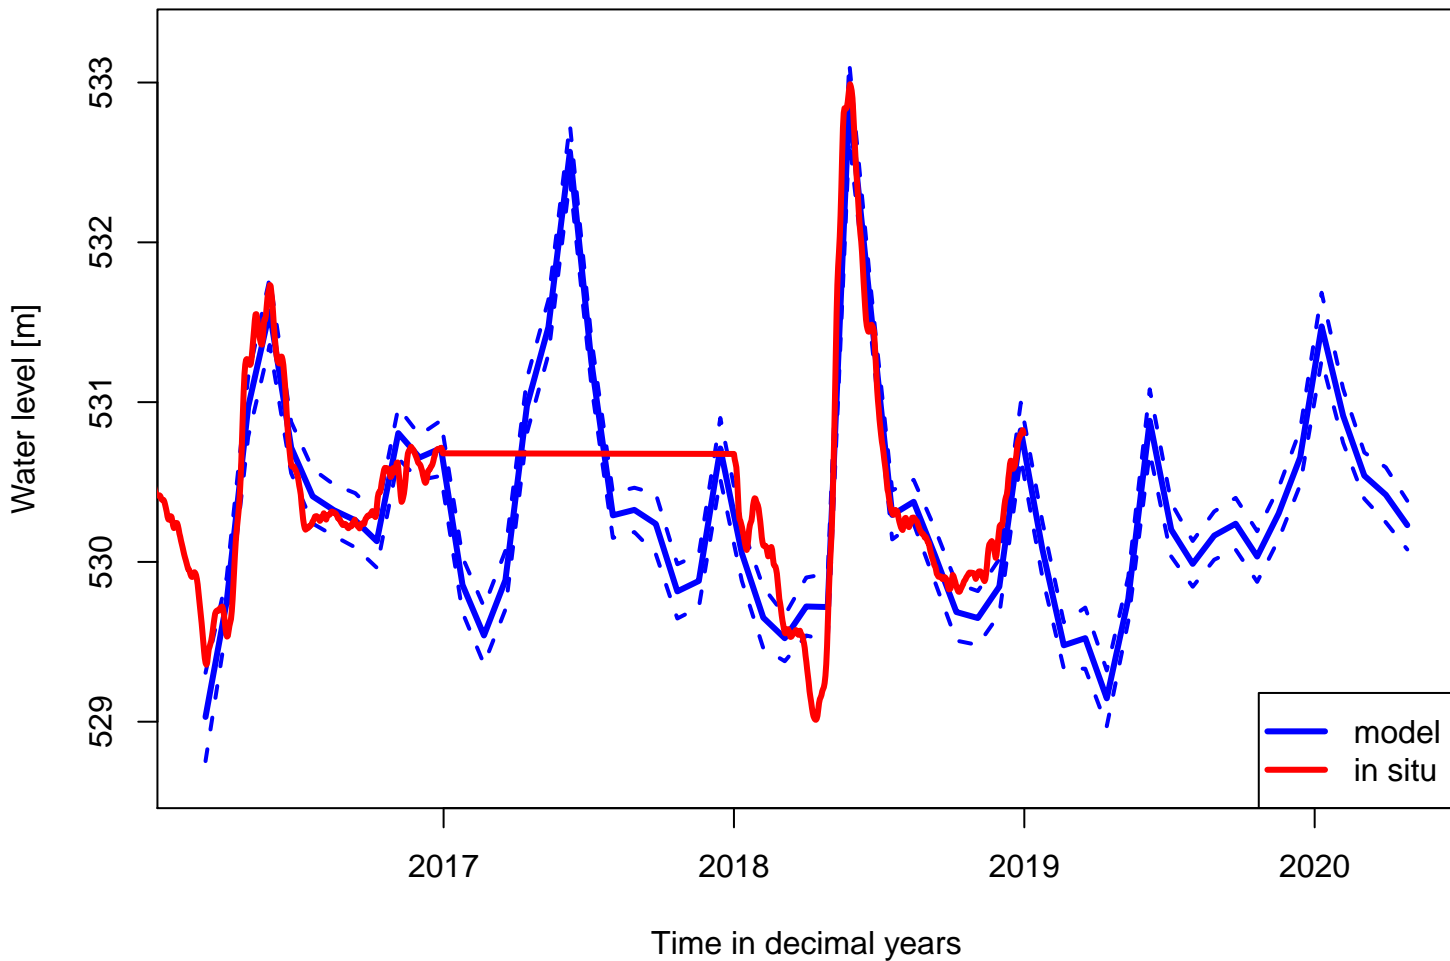

Supplement: s1 [file s1]

**lakename: lakeid: 753 lat: 45.4 lon: -73.96**

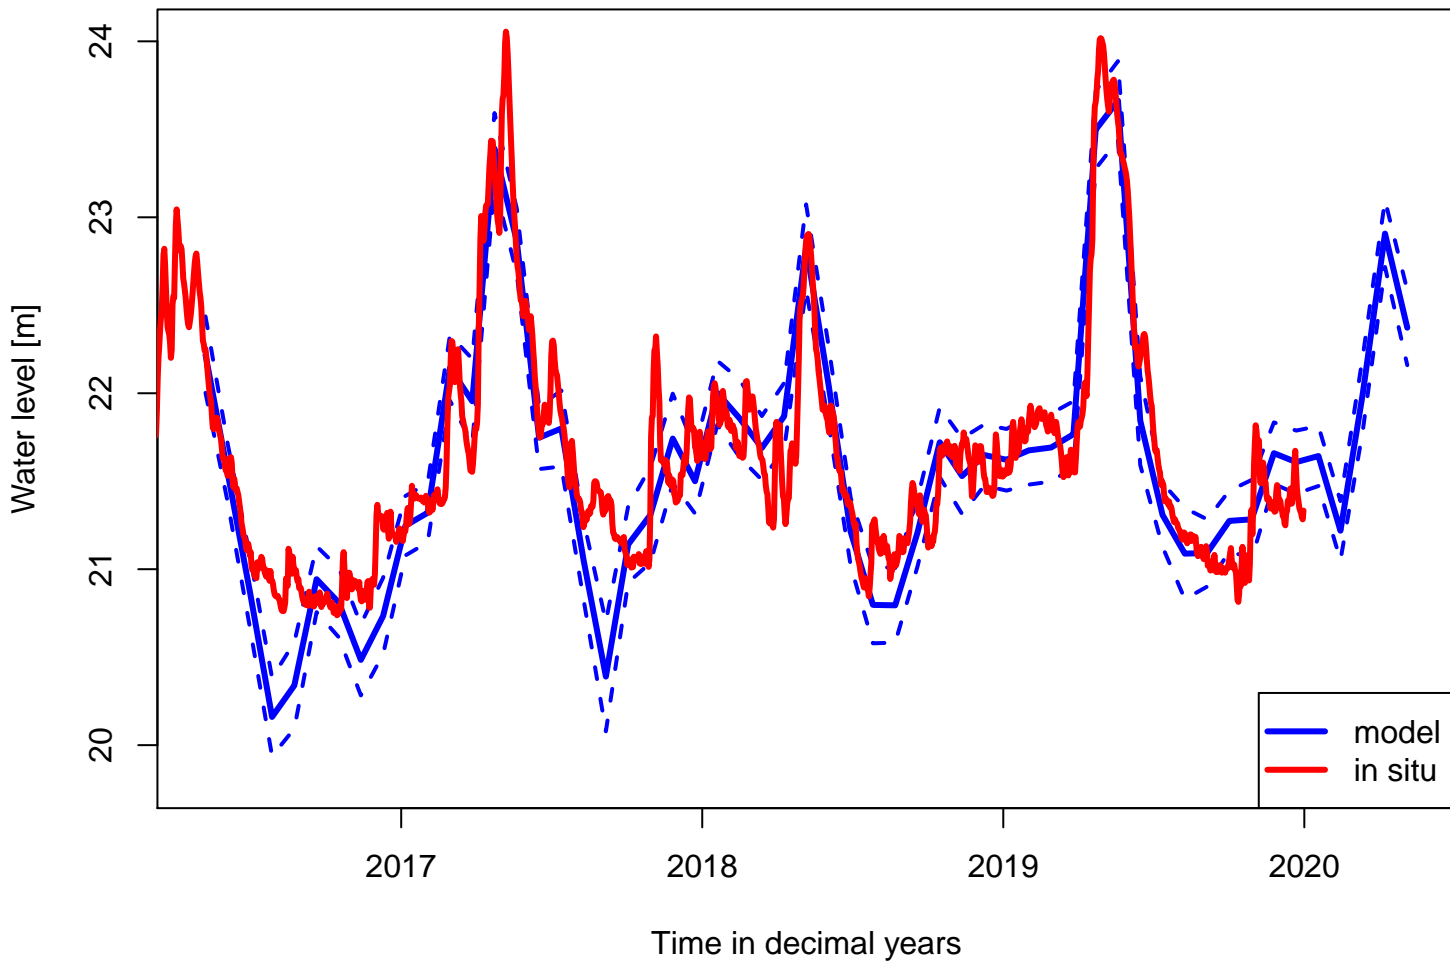

Supplement: s1 [file s1]

**lakename: Laberge lakeid: 365 lat: 61.09 lon: -135.2**

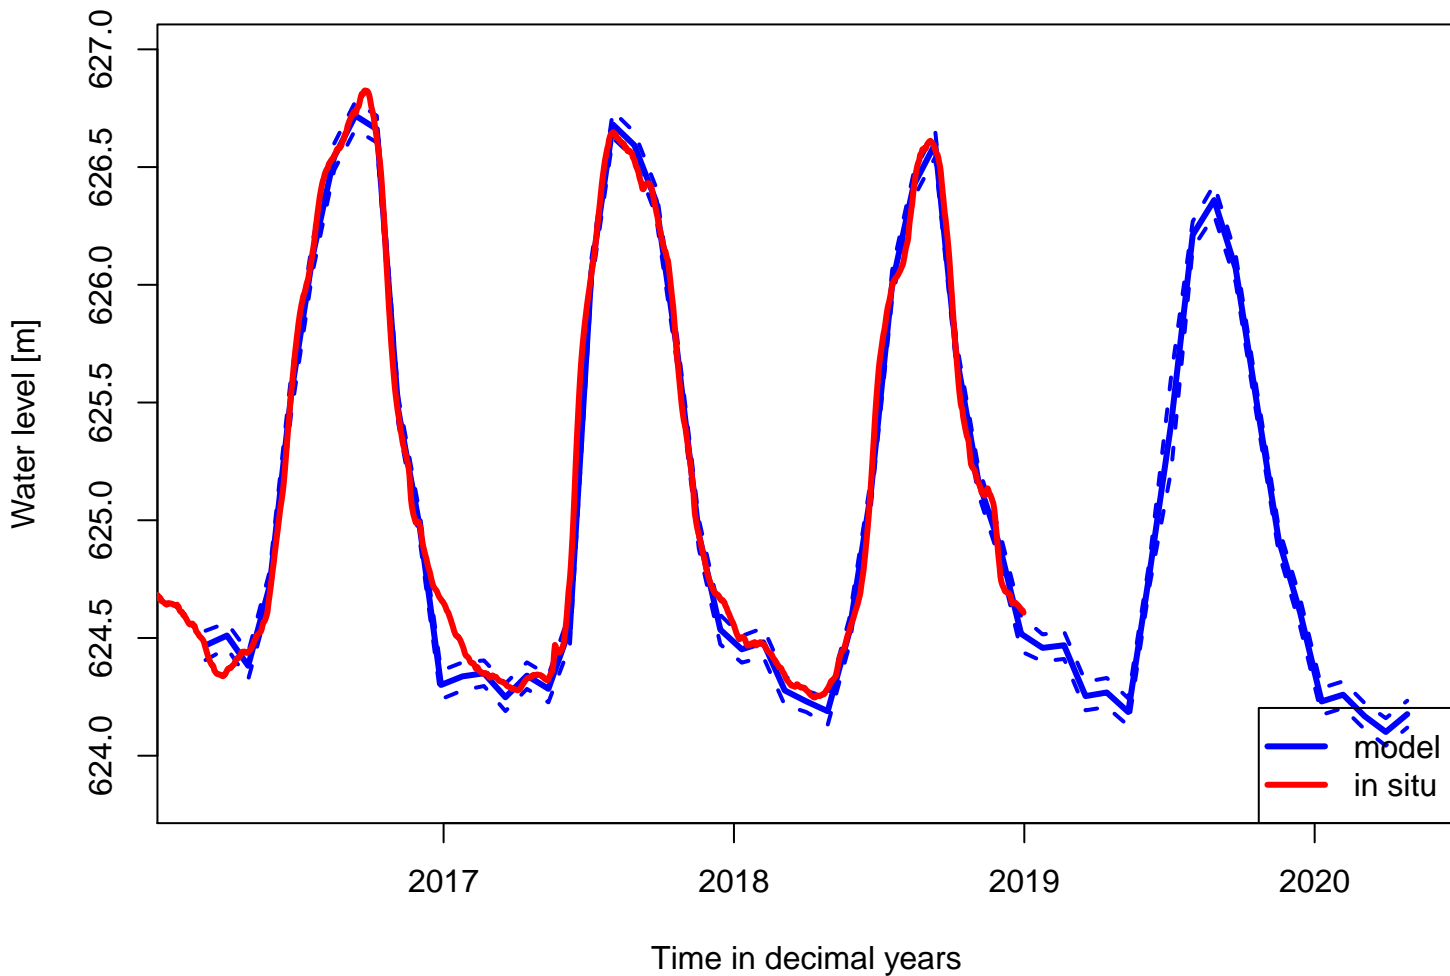

Supplement: s1 [file s1]

**lakename: Adams lakeid: 651 lat: 50.94 lon: -119.7**

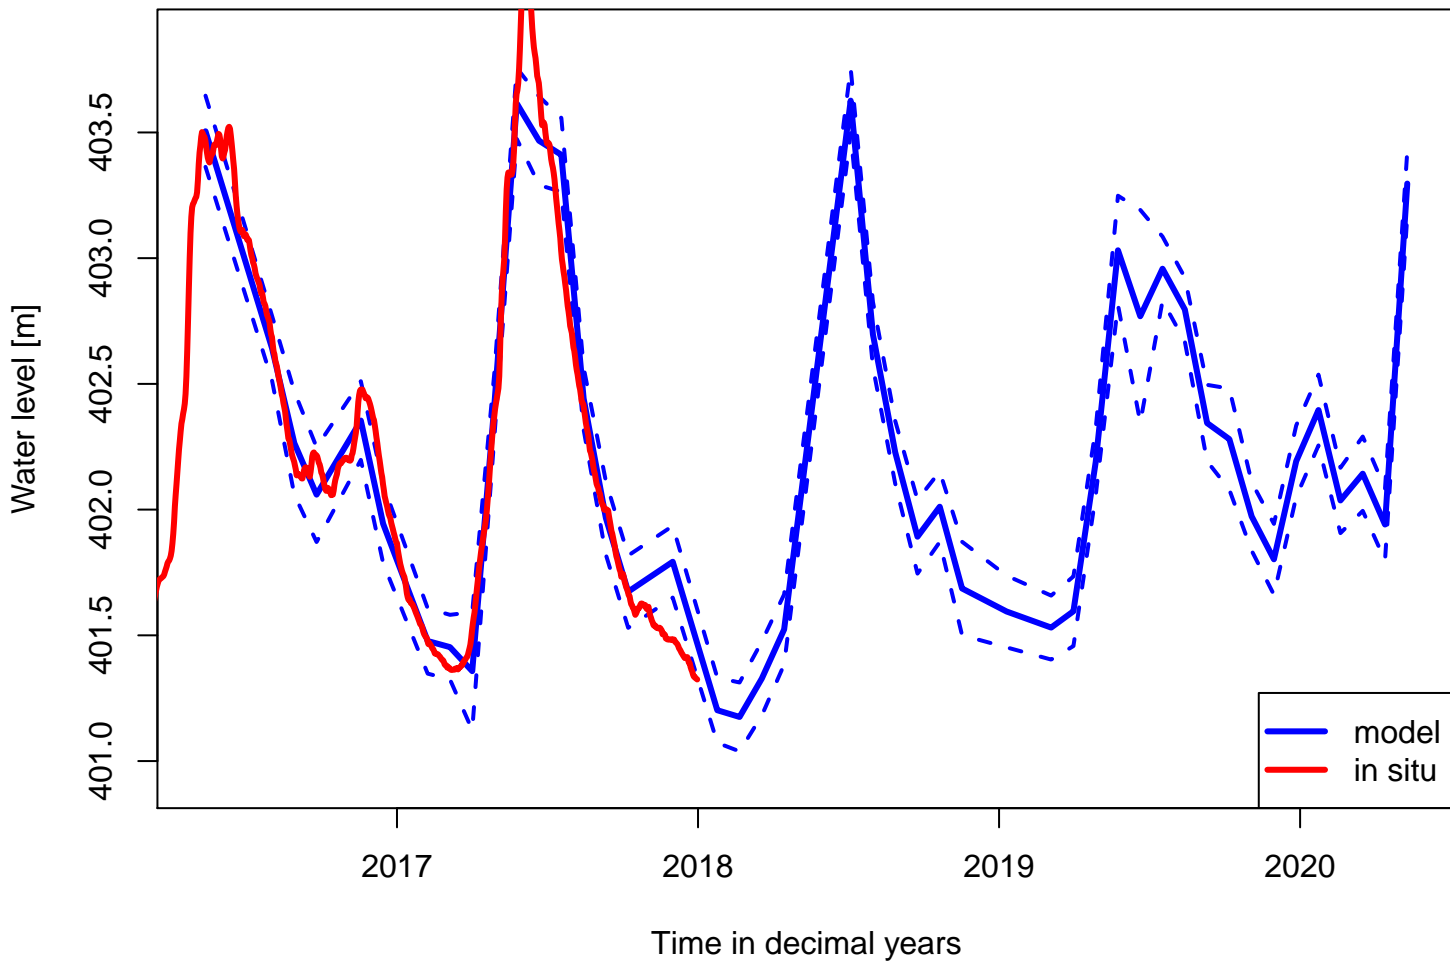

Supplement: s1 [file s1]

**lakename: lakeid: 8822 lat: 45.57 lon: -67.43**

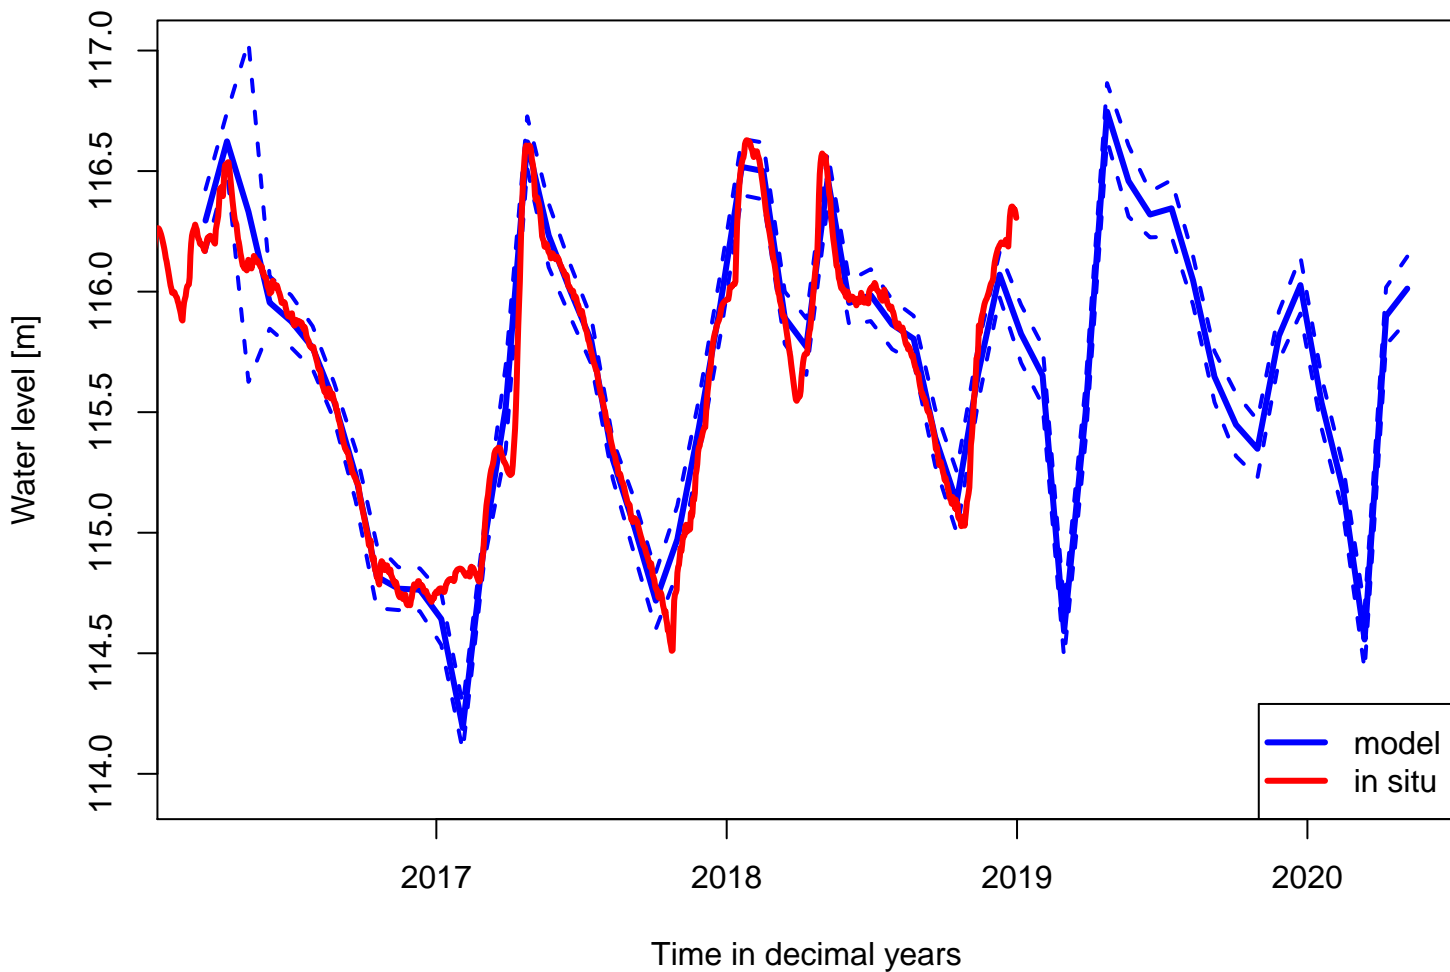

Supplement: s1 [file s1]

**lakename: Tobin lakeid: 589 lat: 53.66 lon: -103.4**

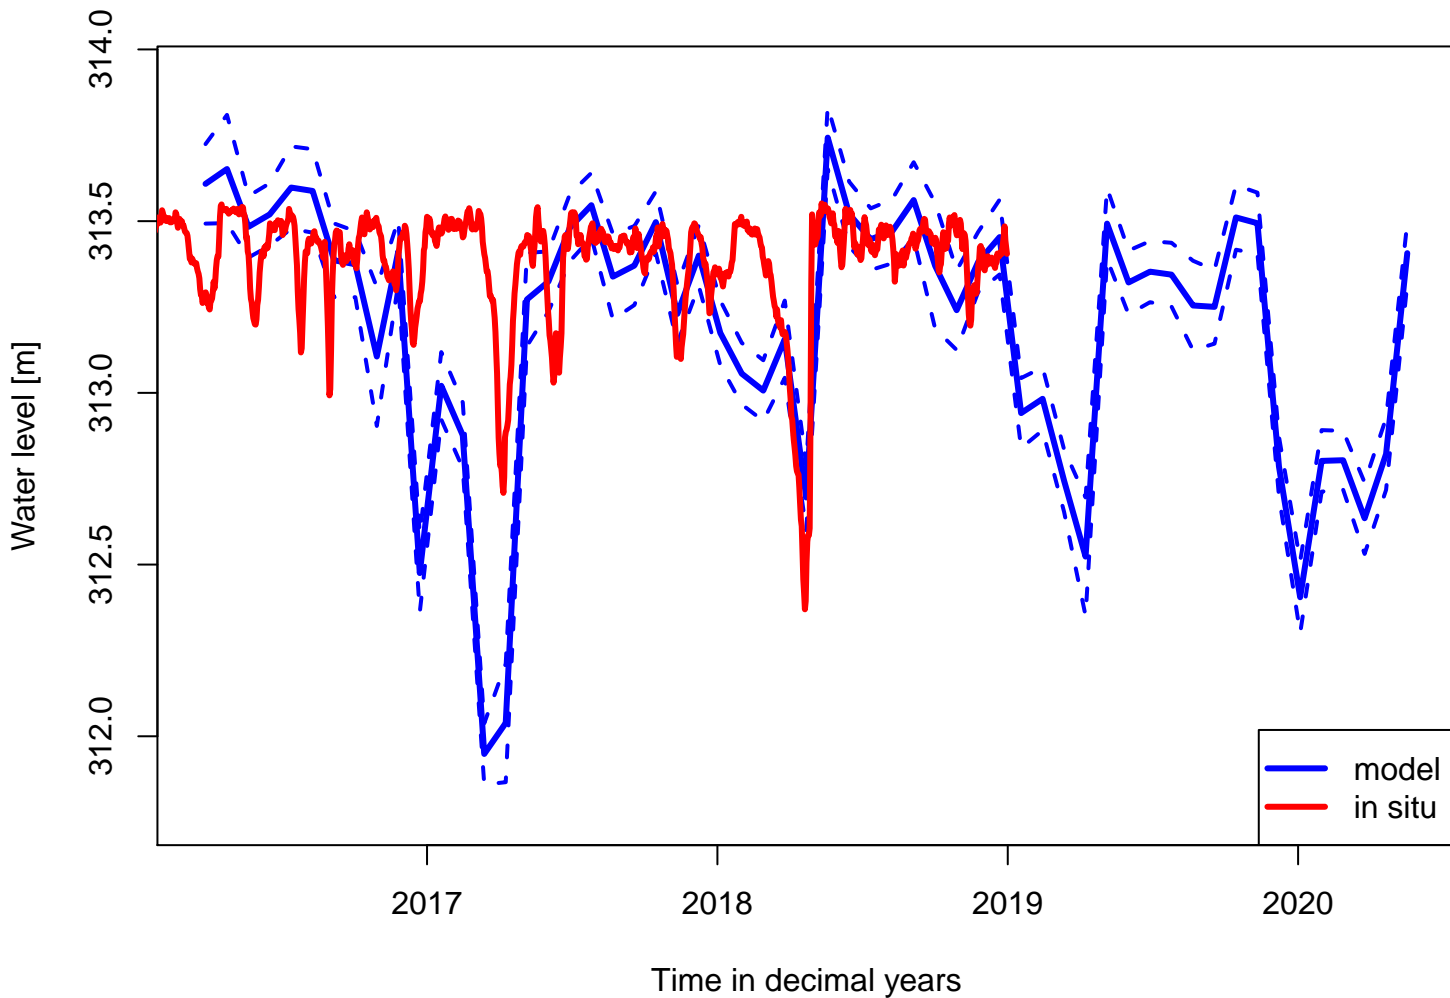

Supplement: s1 [file s1]

**lakename: lakeid: 631 lat: 51.78 lon: -104.3**

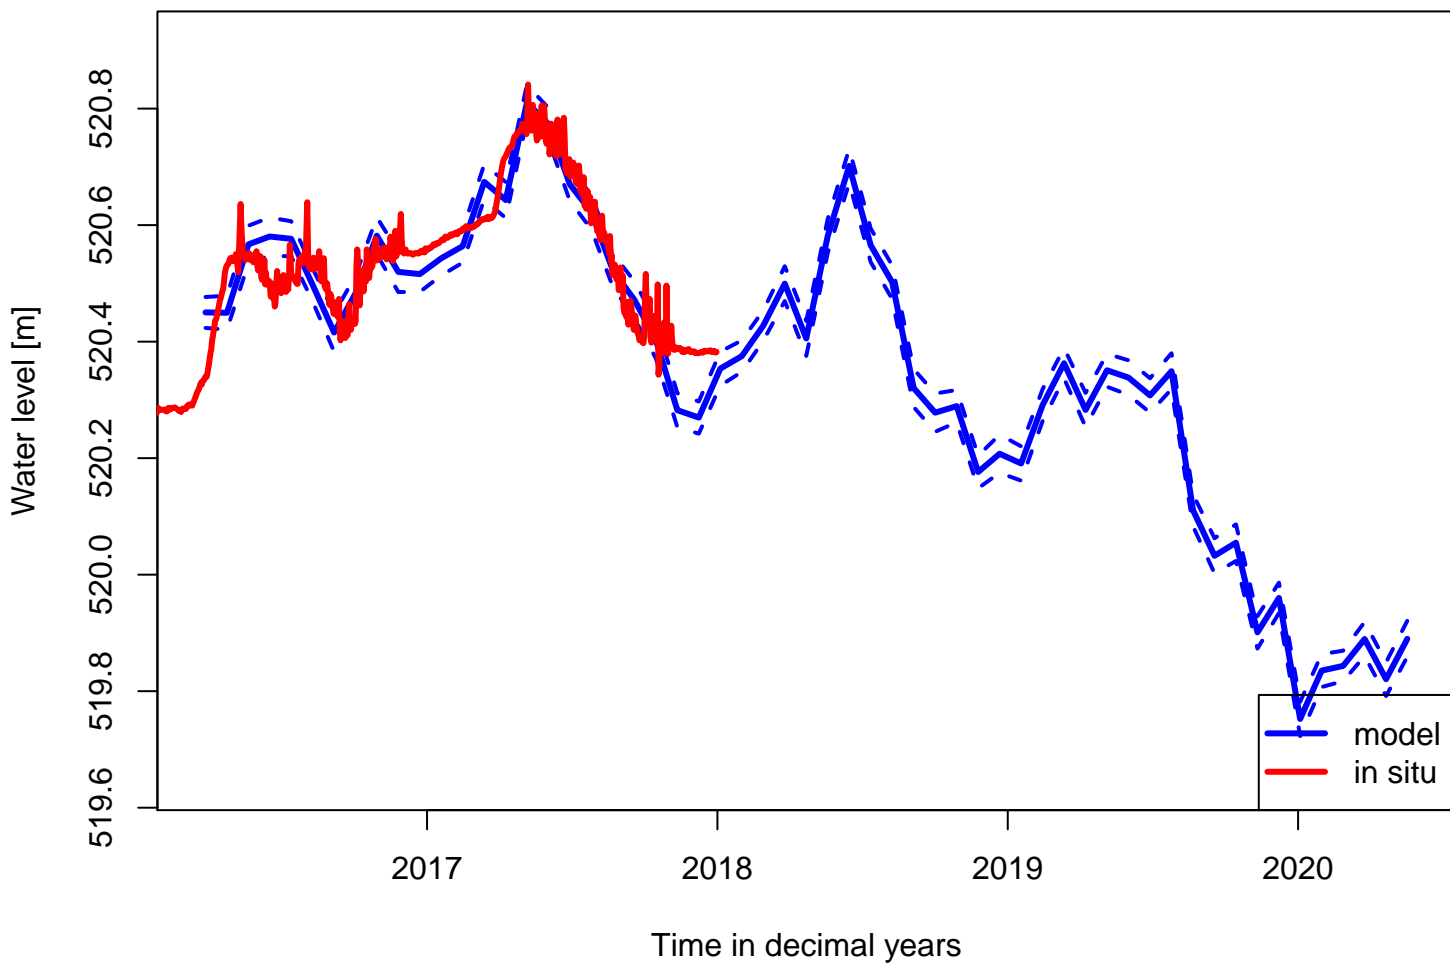

Supplement: s1 [file s1]

**lakename: Sacandaga Reservoir lakeid: 9074 lat: 43.32 lon: -73.93**

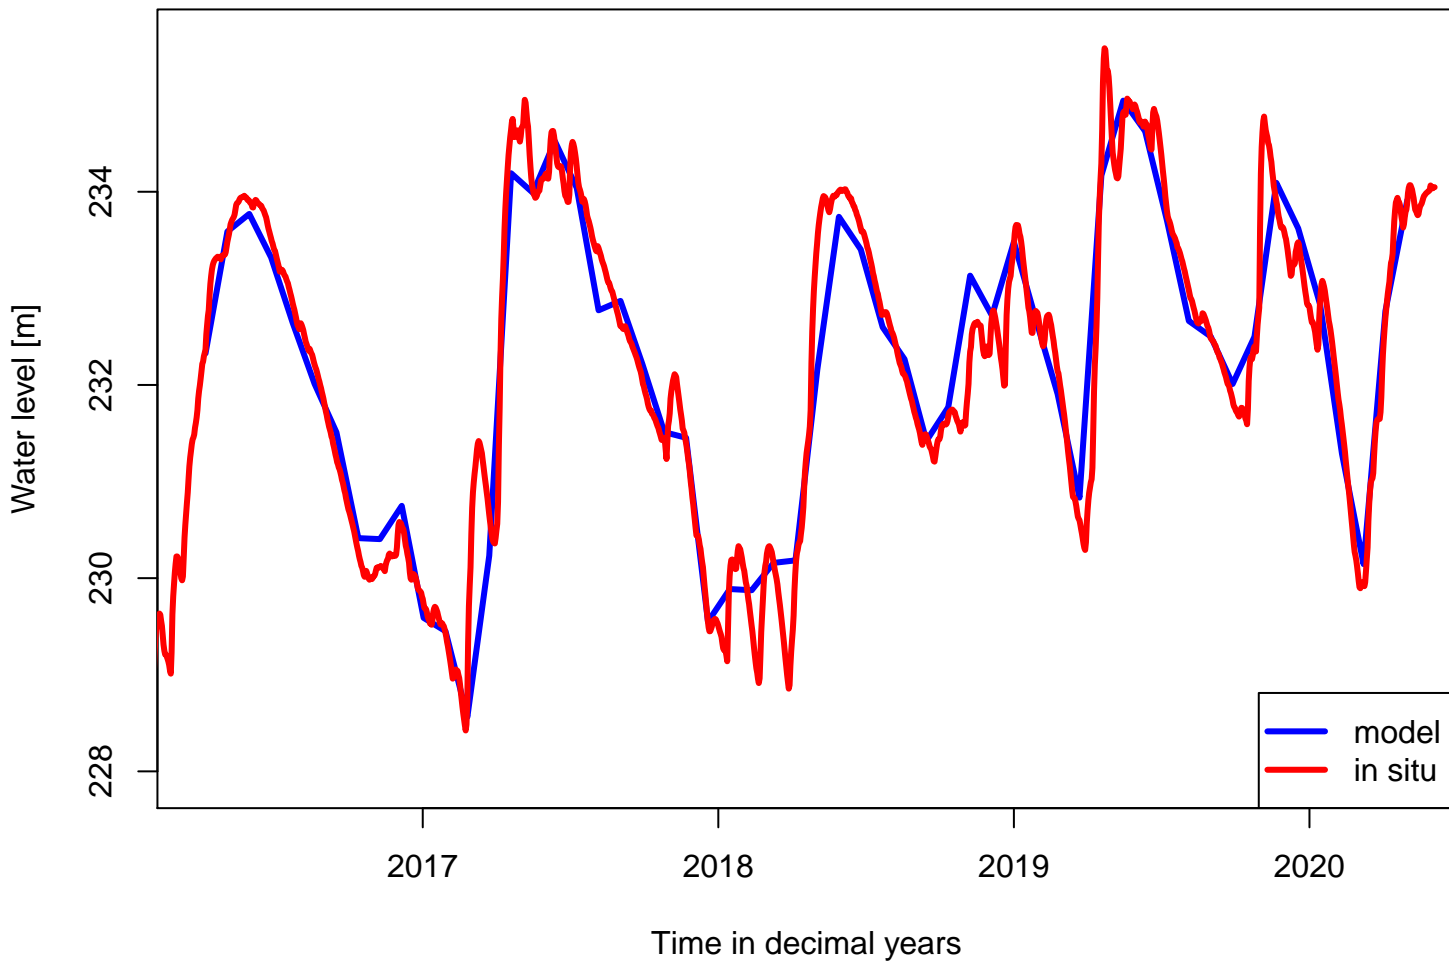

Supplement: s1 [file s1]

**lakename: Chilko lakeid: 636 lat: 51.62 lon: -124.1**

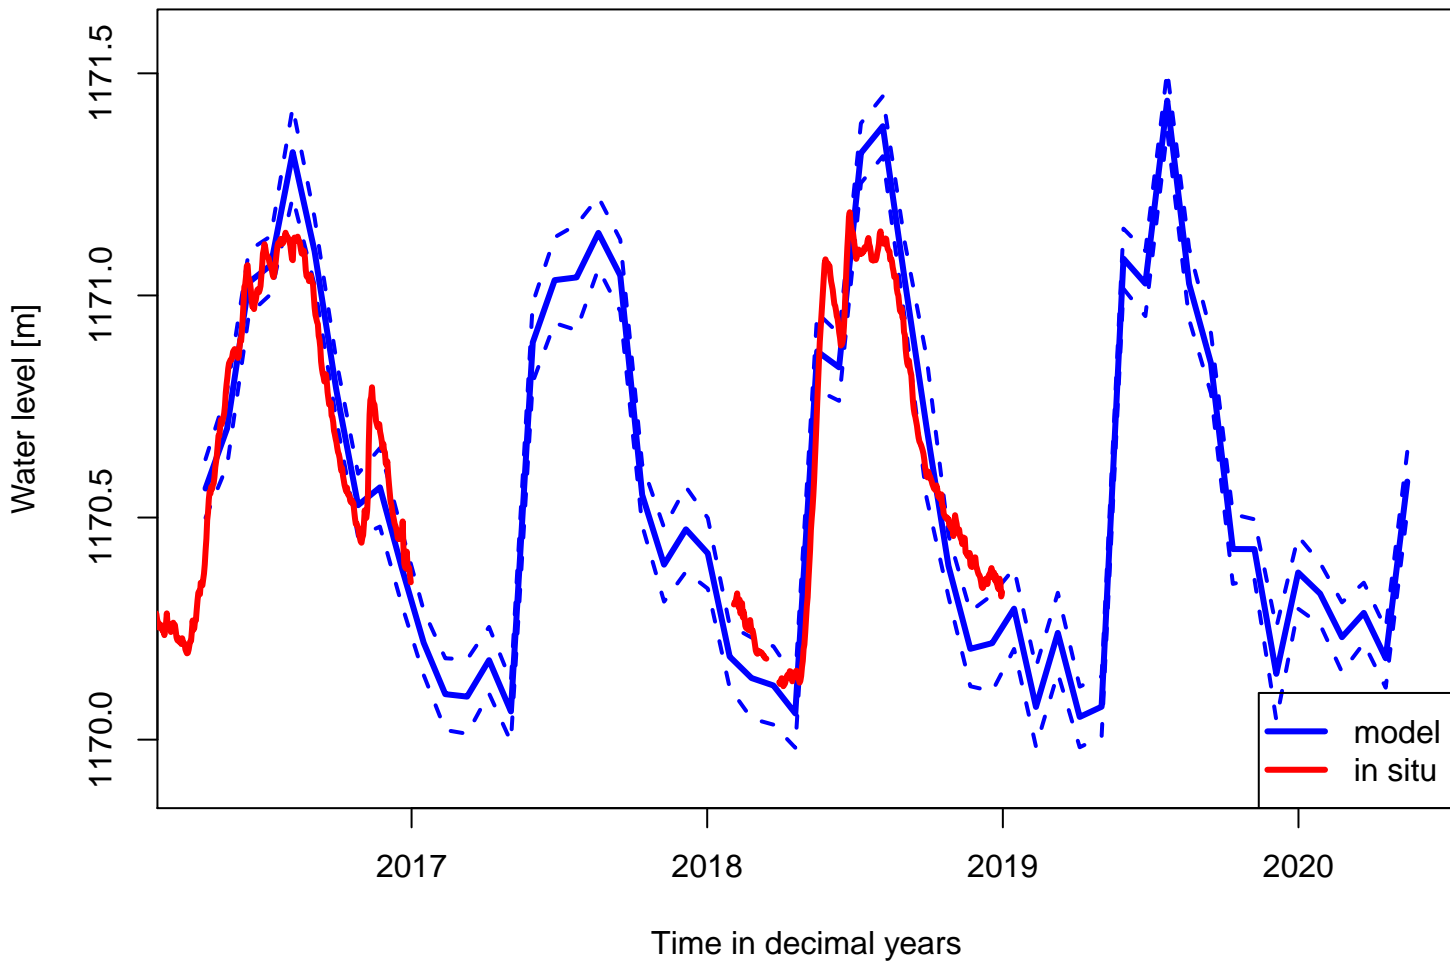

Supplement: s1 [file s1]

**lakename: John H. Kerr Reservoir lakeid: 805 lat: 36.6 lon: -78.3**

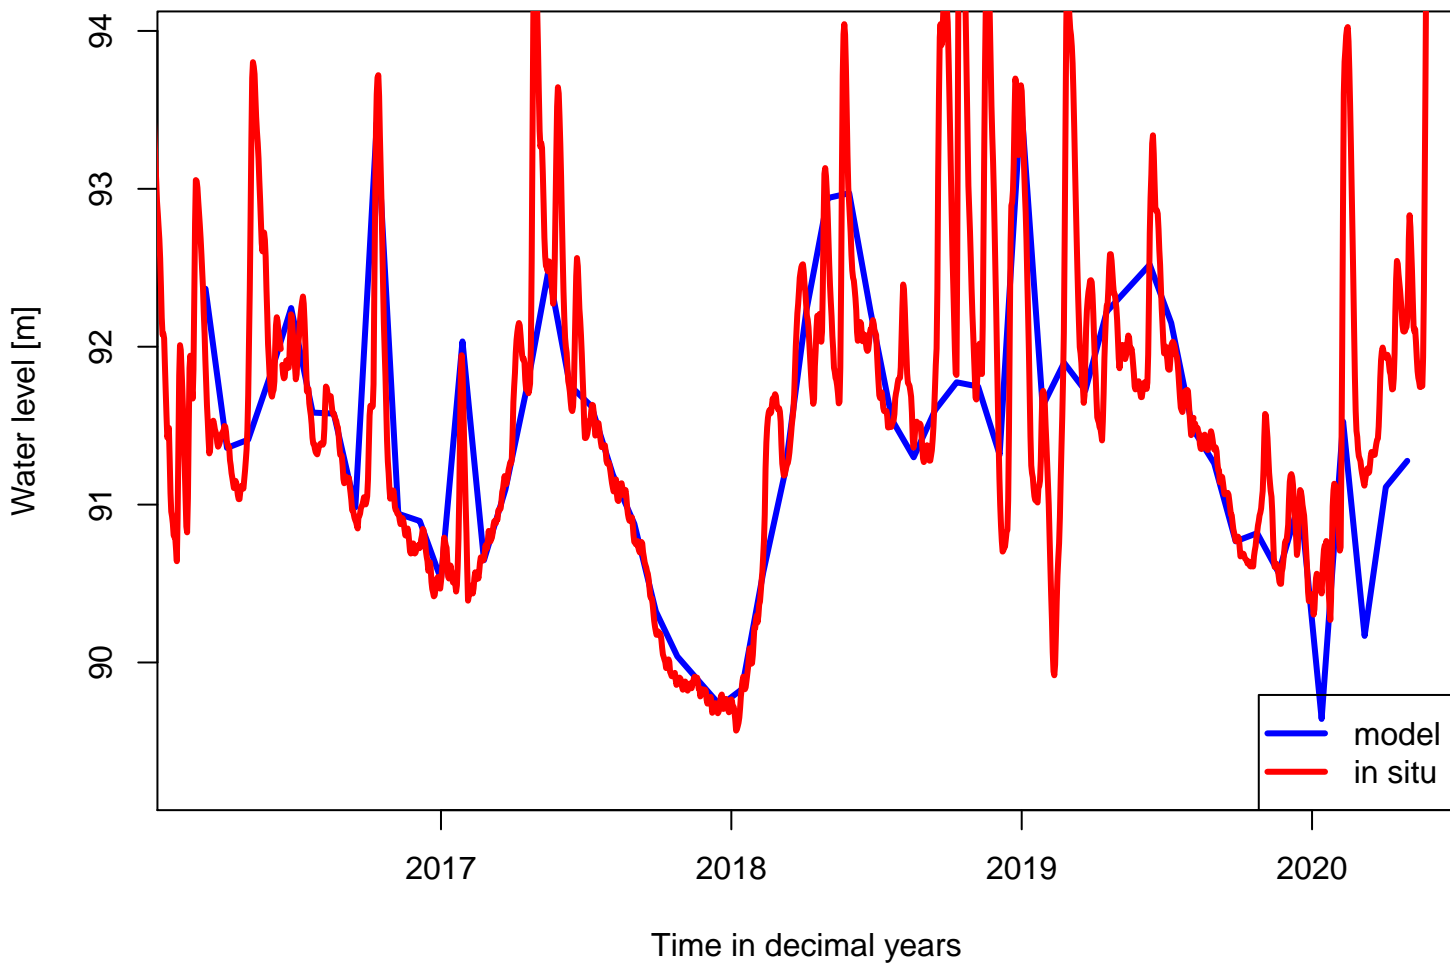

Supplement: s1 [file s1]

**lakename: lakeid: 252 lat: 65.6 lon: -117.8**

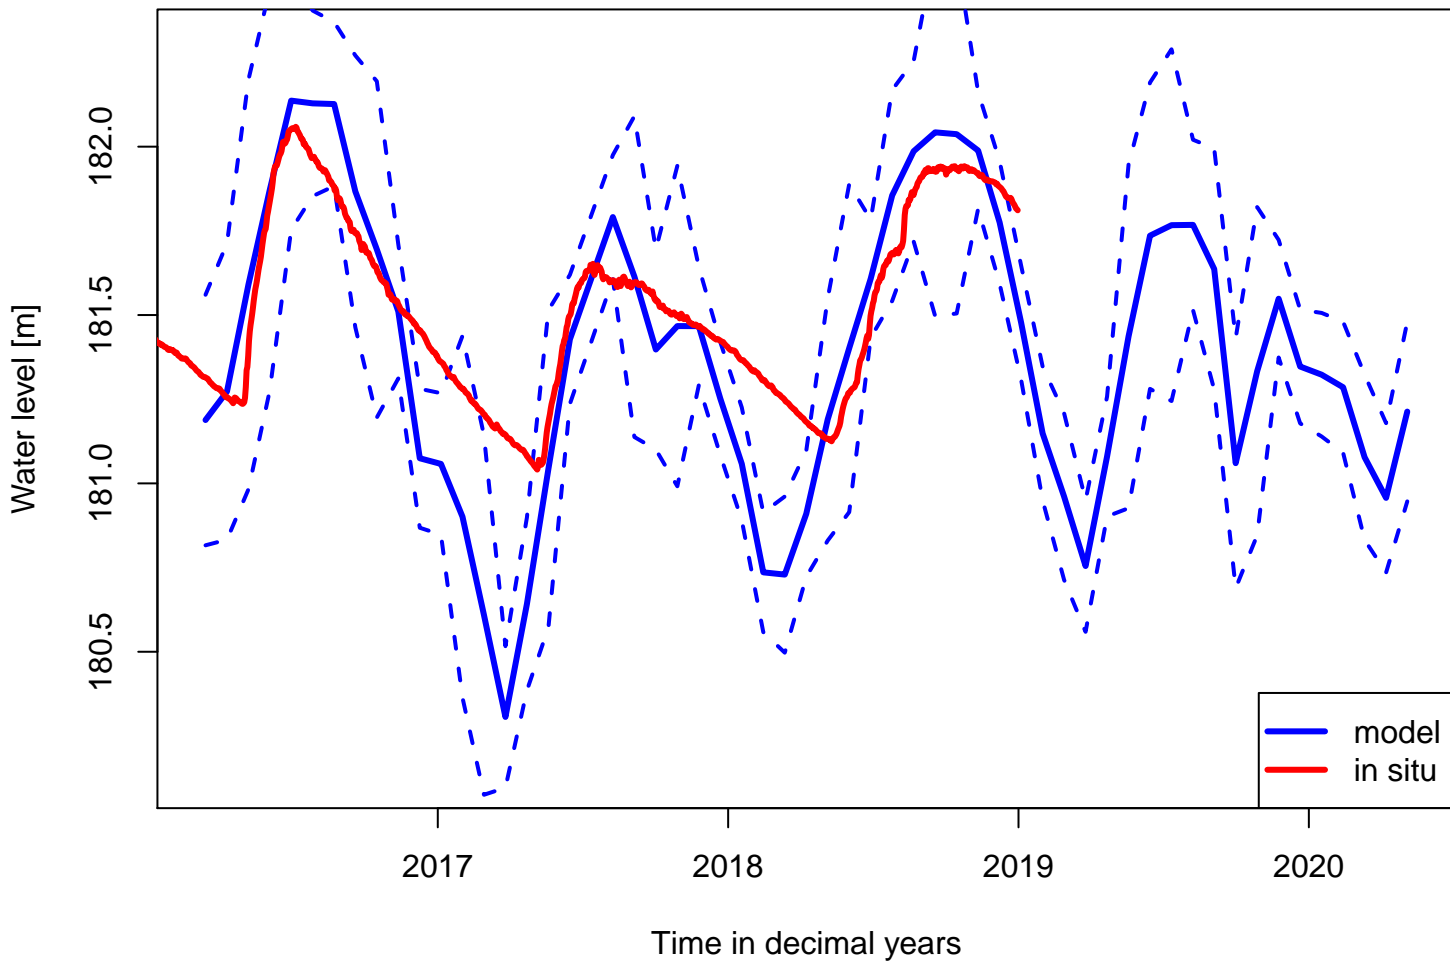

Supplement: s1 [file s1]

**lakename: Red Lake Reservoir lakeid: 61 lat: 47.96 lon: -95.28**

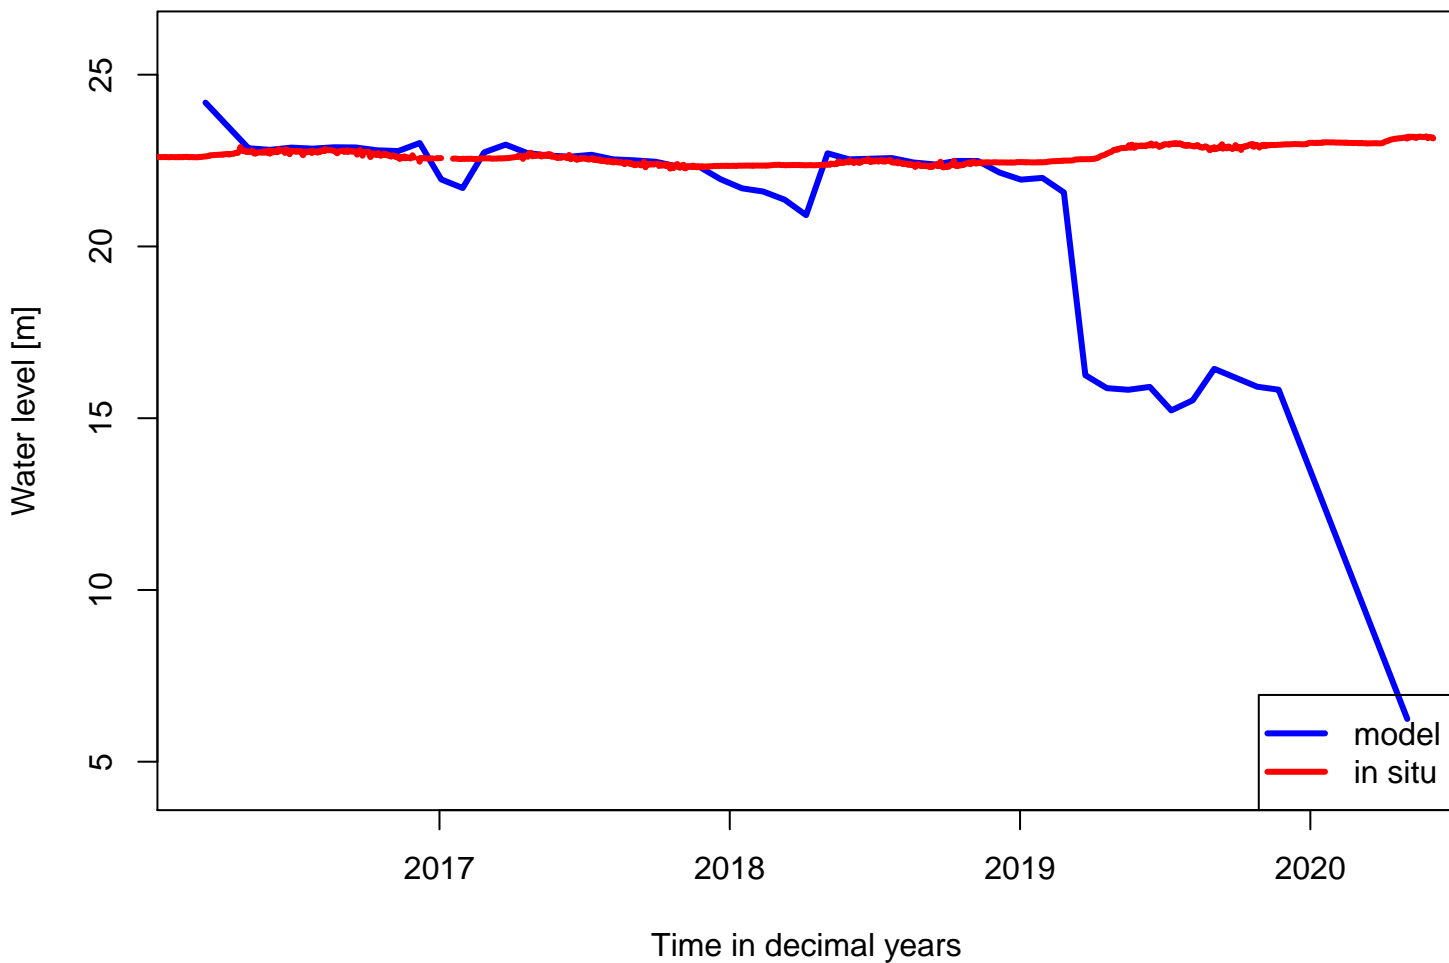

Supplement: s1 [file s1]

**lakename: Southern Indian lakeid: 37 lat: 56.69 lon: -99.02**

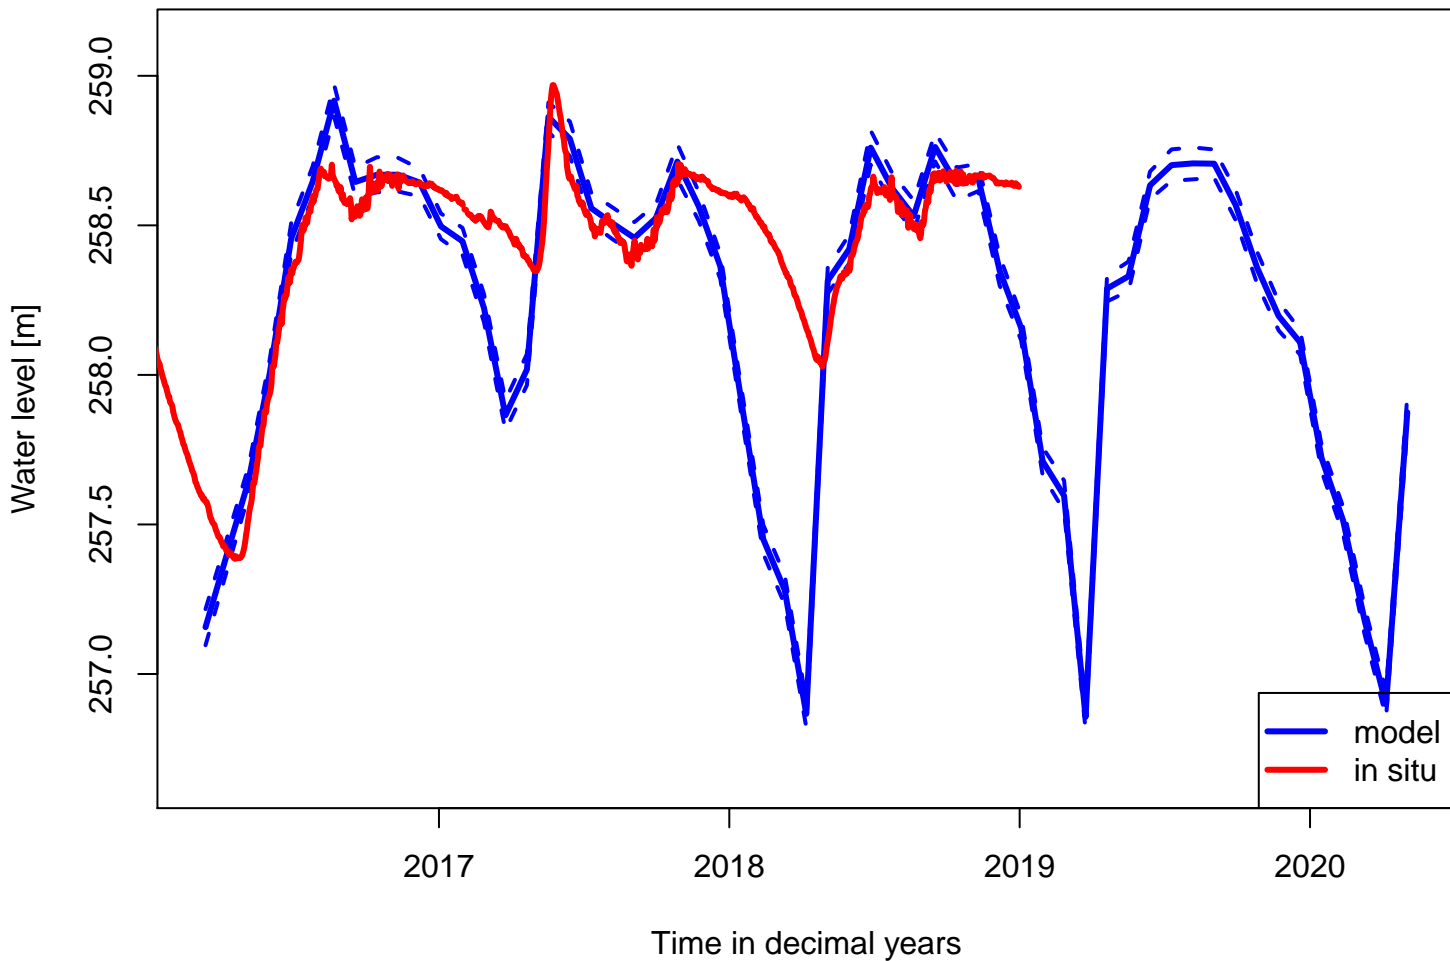

Supplement: s1 [file s1]

**lakename: Lake Powell lakeid: 802 lat: 36.94 lon: -111.5**

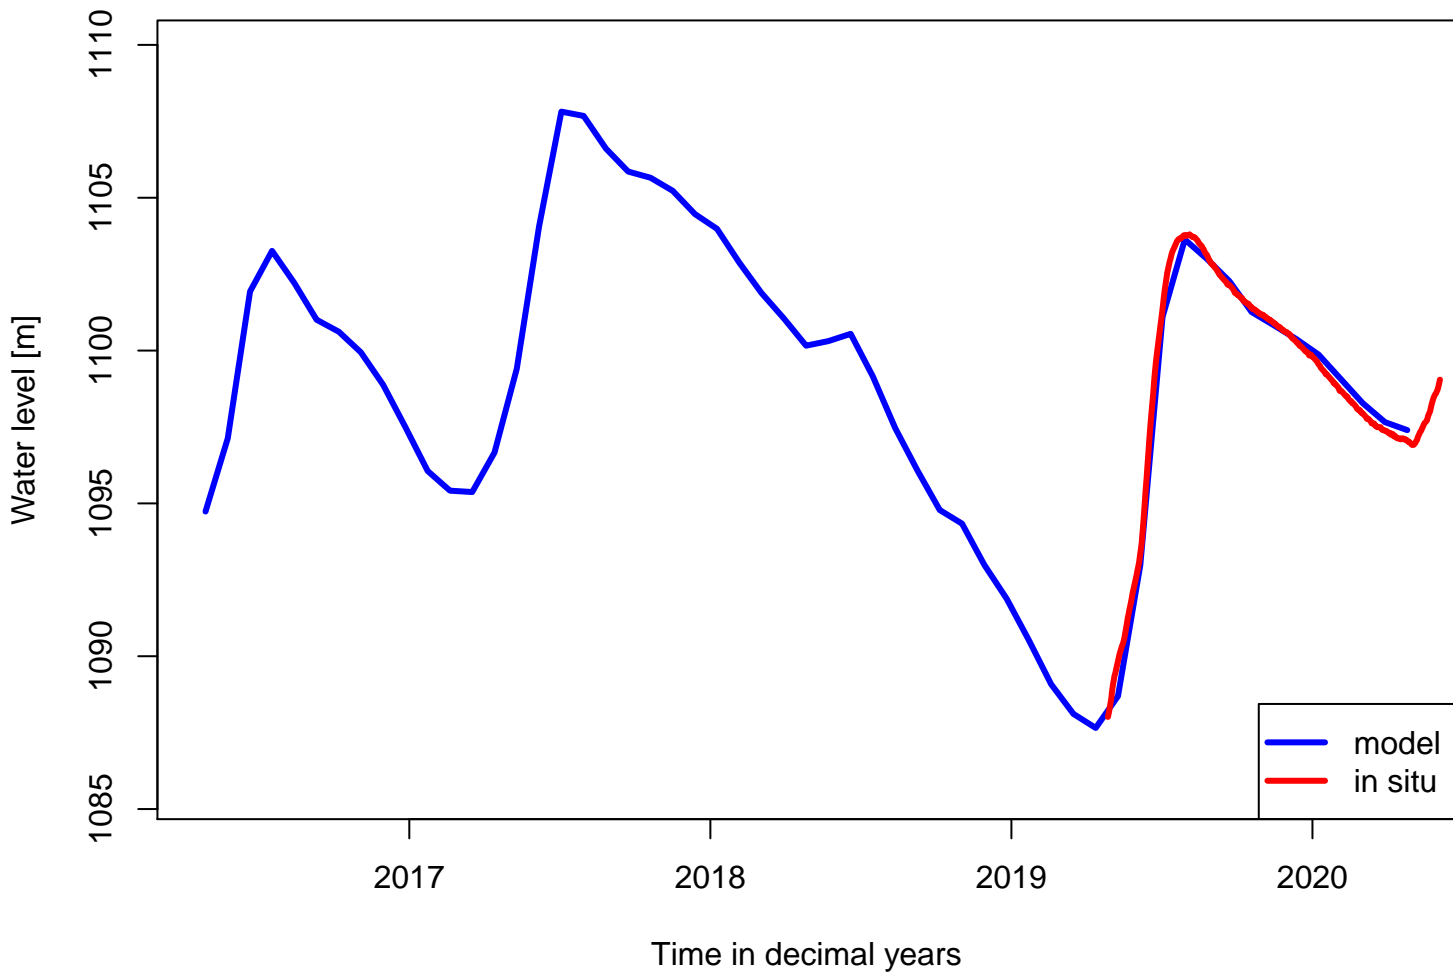

Supplement: s1 [file s1]

**lakename: Candle lakeid: 586 lat: 53.77 lon: -105.3**

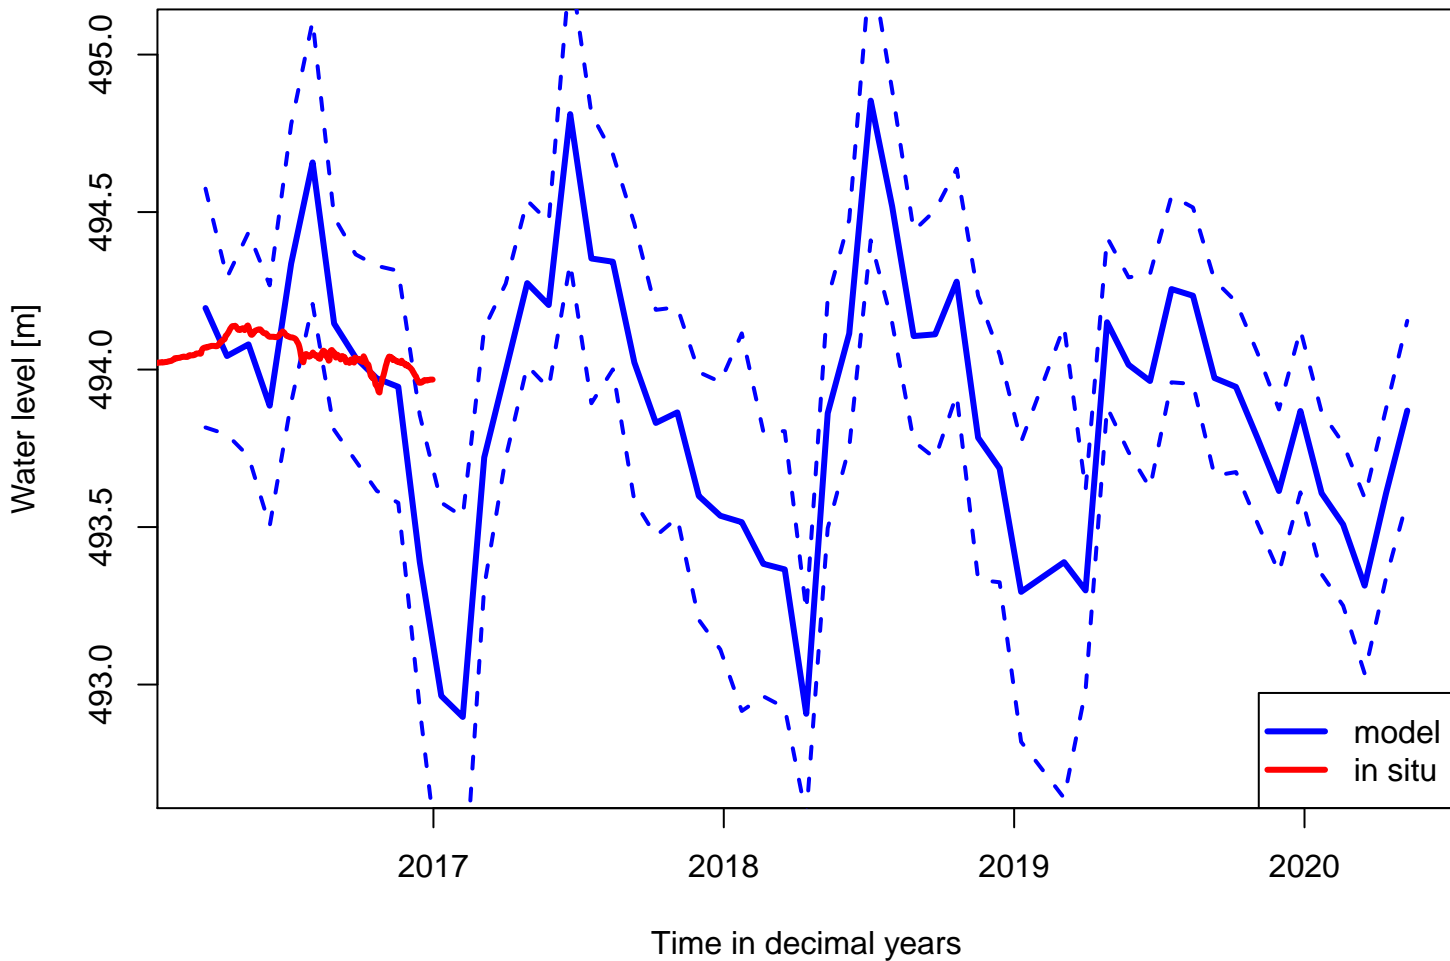

Supplement: s1 [file s1]

**lakename: lakeid: 252 lat: 65.6 lon: -117.8**

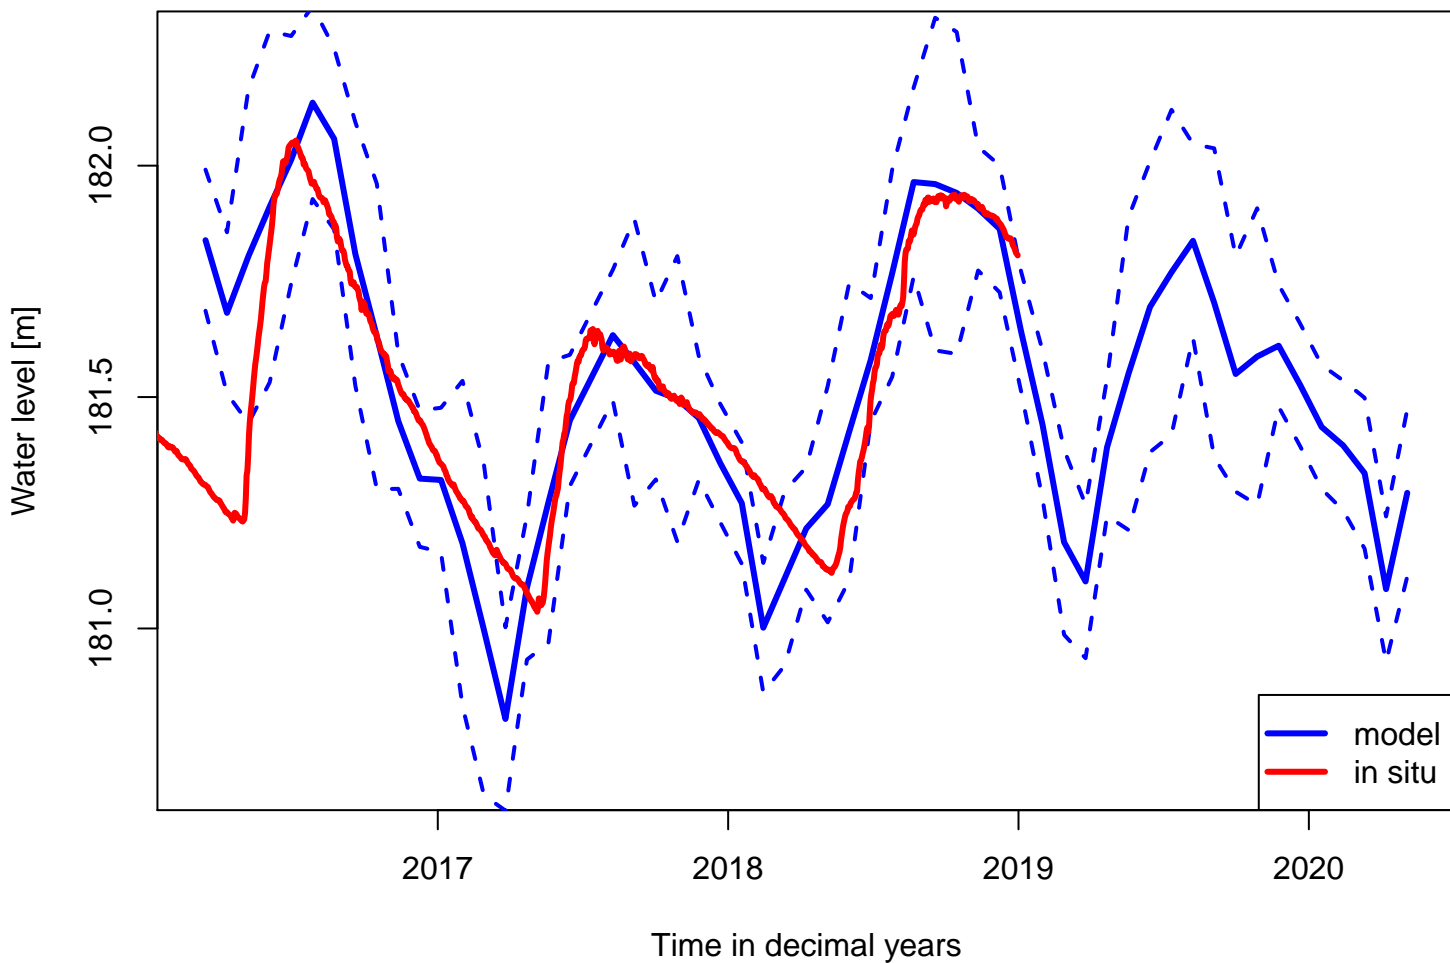

Supplement: s1 [file s1]

**lakename: La Ronge lakeid: 41 lat: 55.1 lon: -105.3**

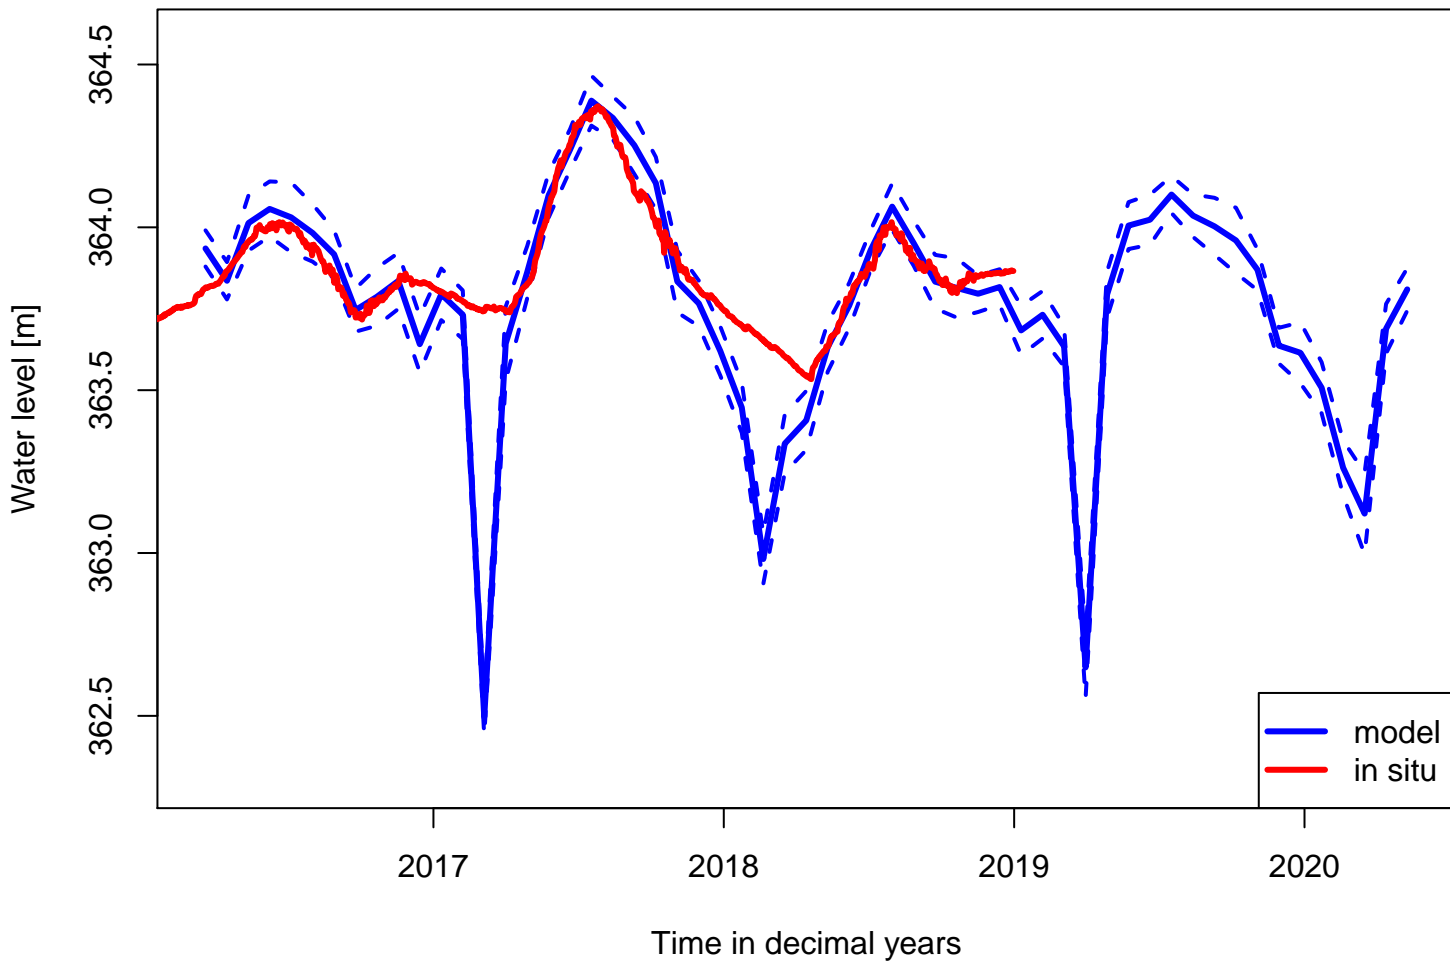

Supplement: s1 [file s1]

**lakename: Lake Tawakoni lakeid: 832 lat: 32.81 lon: -95.92**

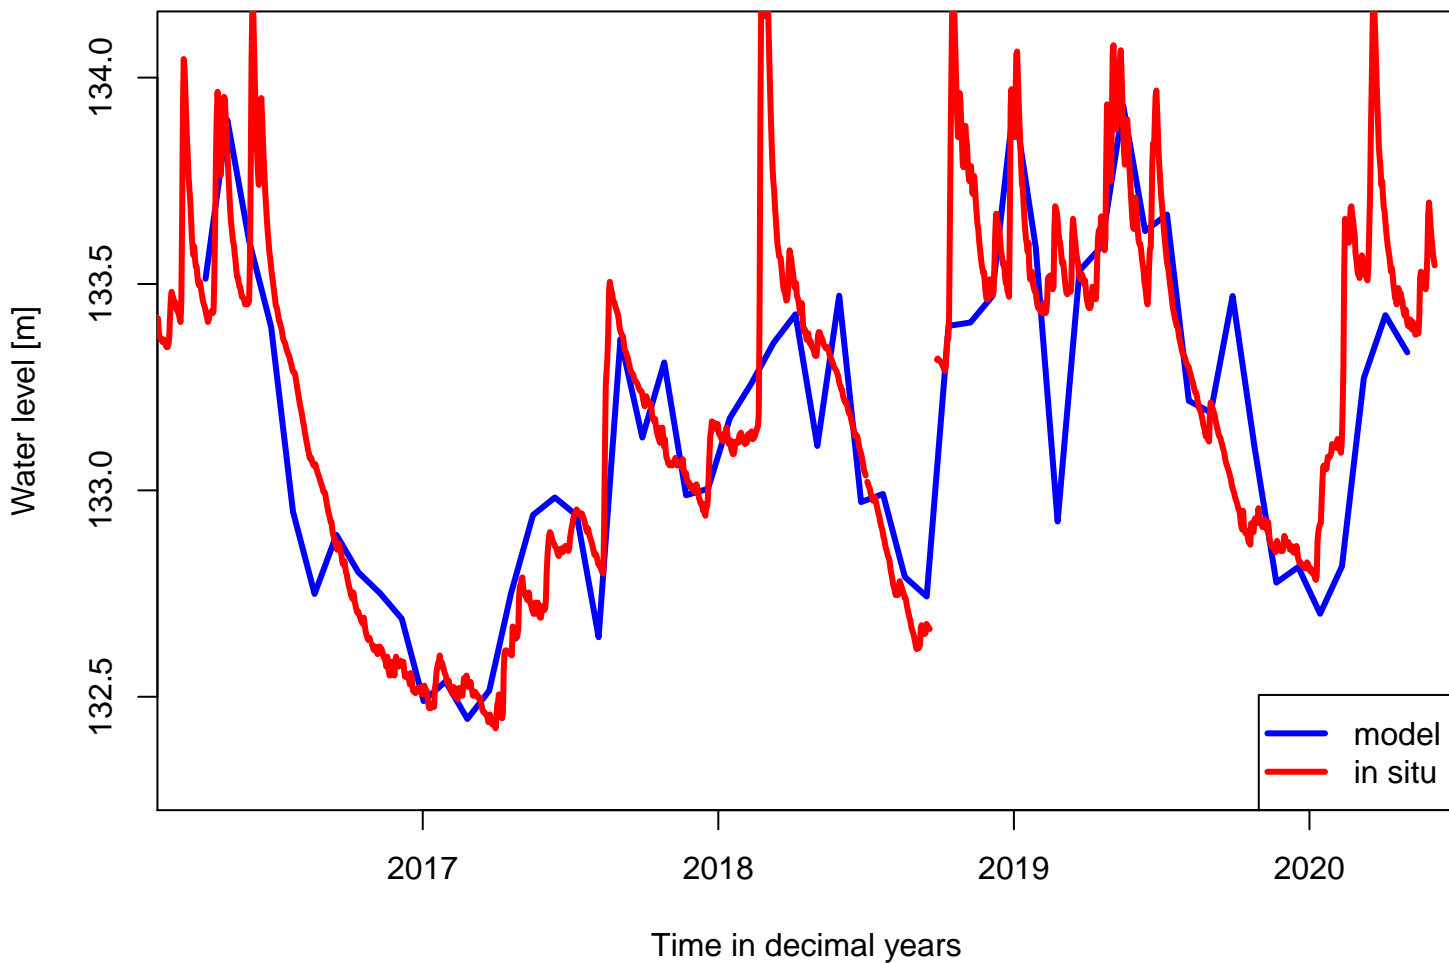

Supplement: s1 [file s1]

**lakename: lakeid: 548 lat: 54.62 lon: -97.79**

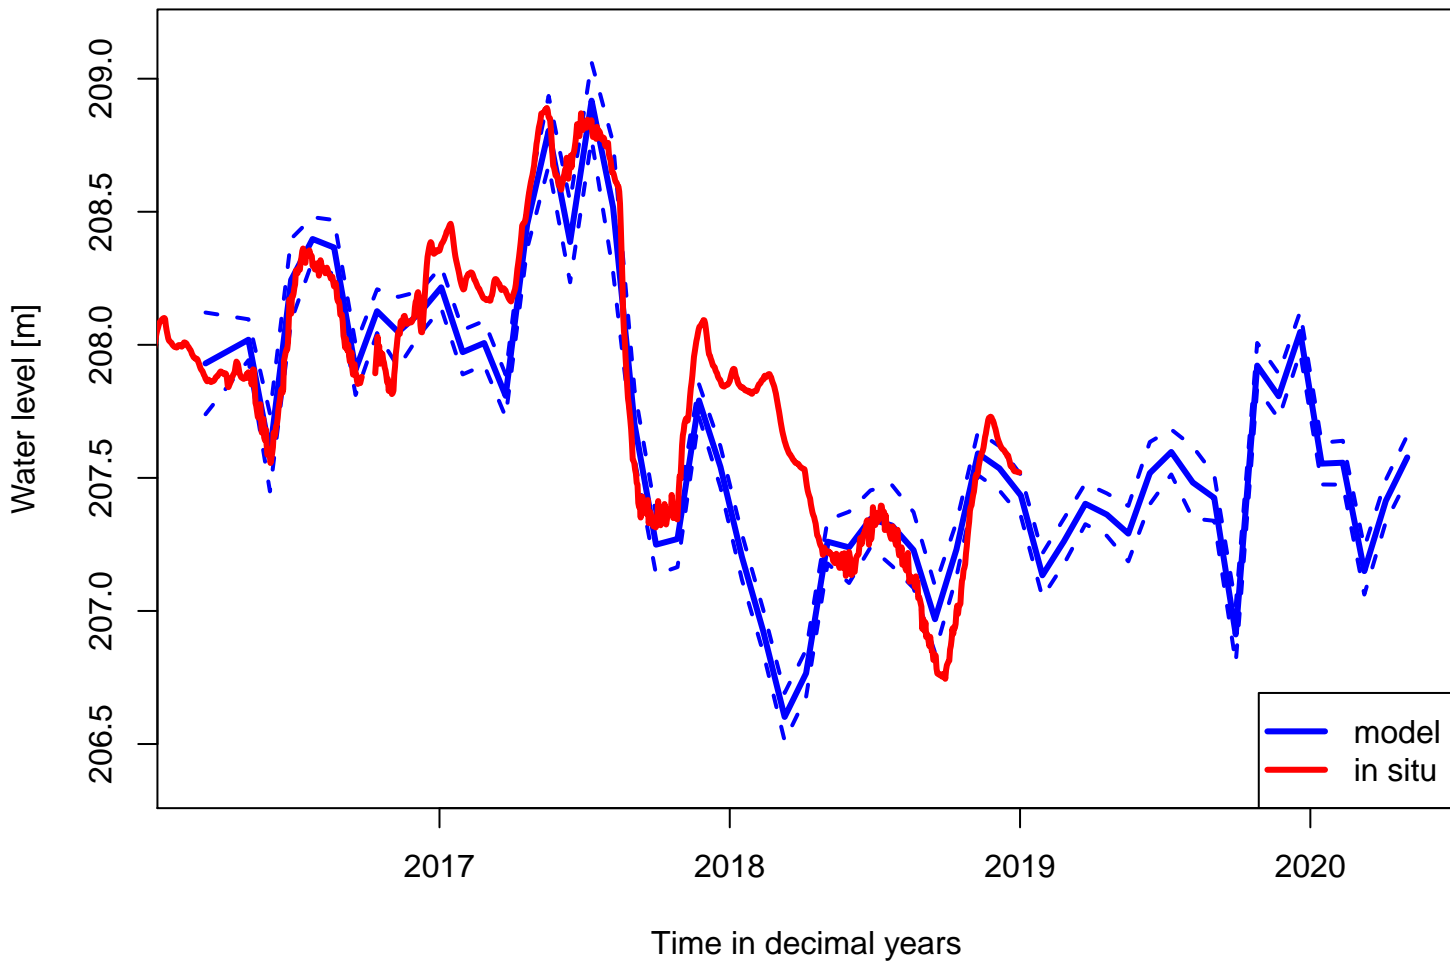

Supplement: s1 [file s1]

**lakename: lakeid: 242 lat: 65.93 lon: -91.07**

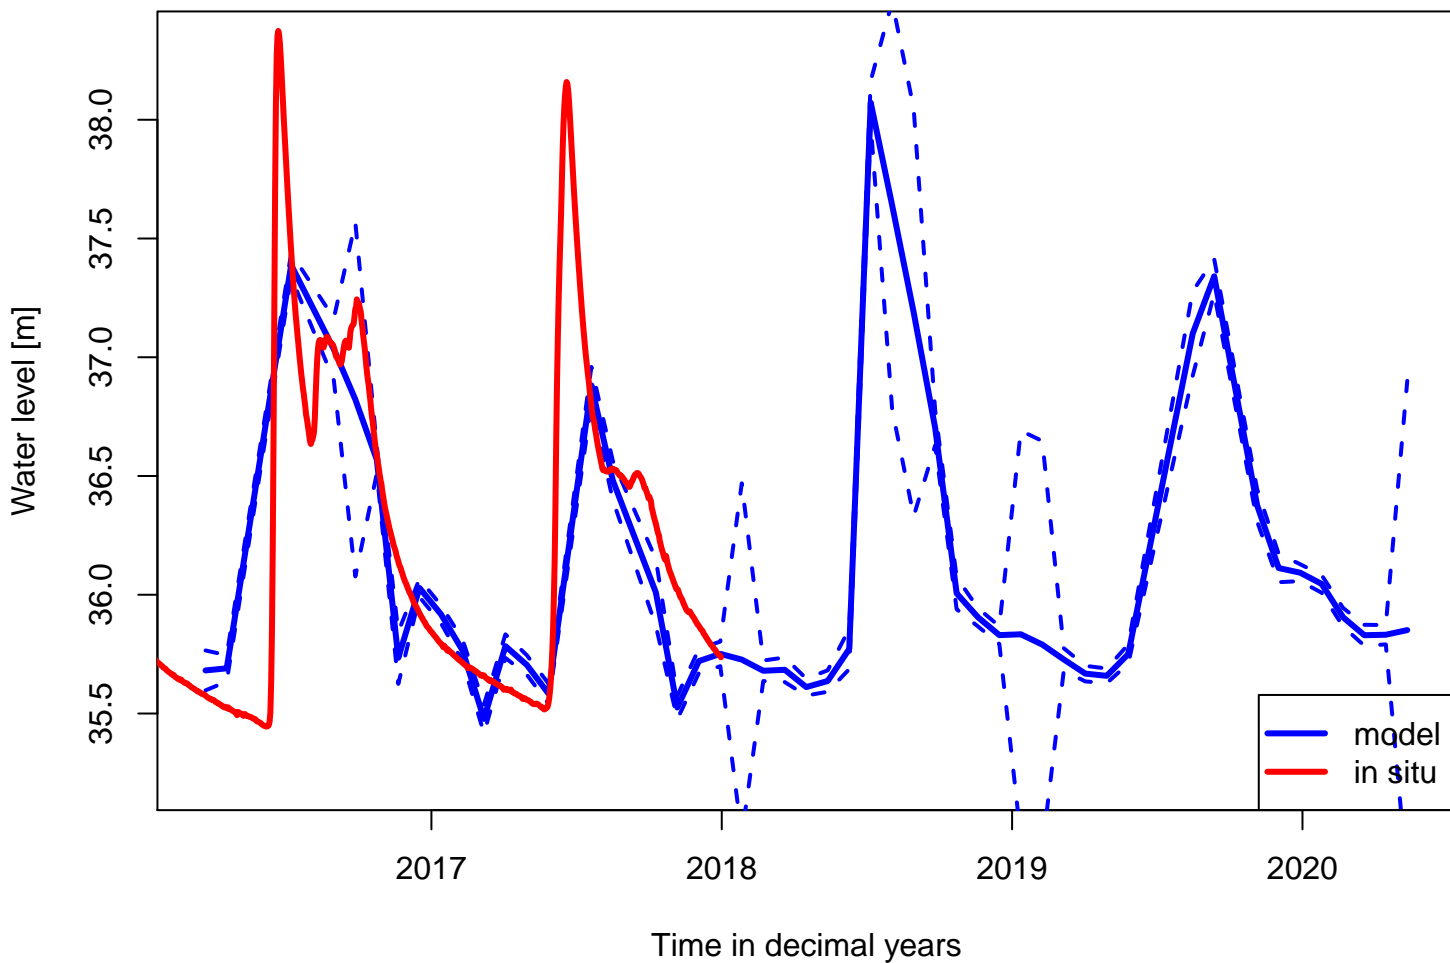

Supplement: s1 [file s1]

**lakename: lakeid: 4762 lat: 59.95 lon: -134.3**

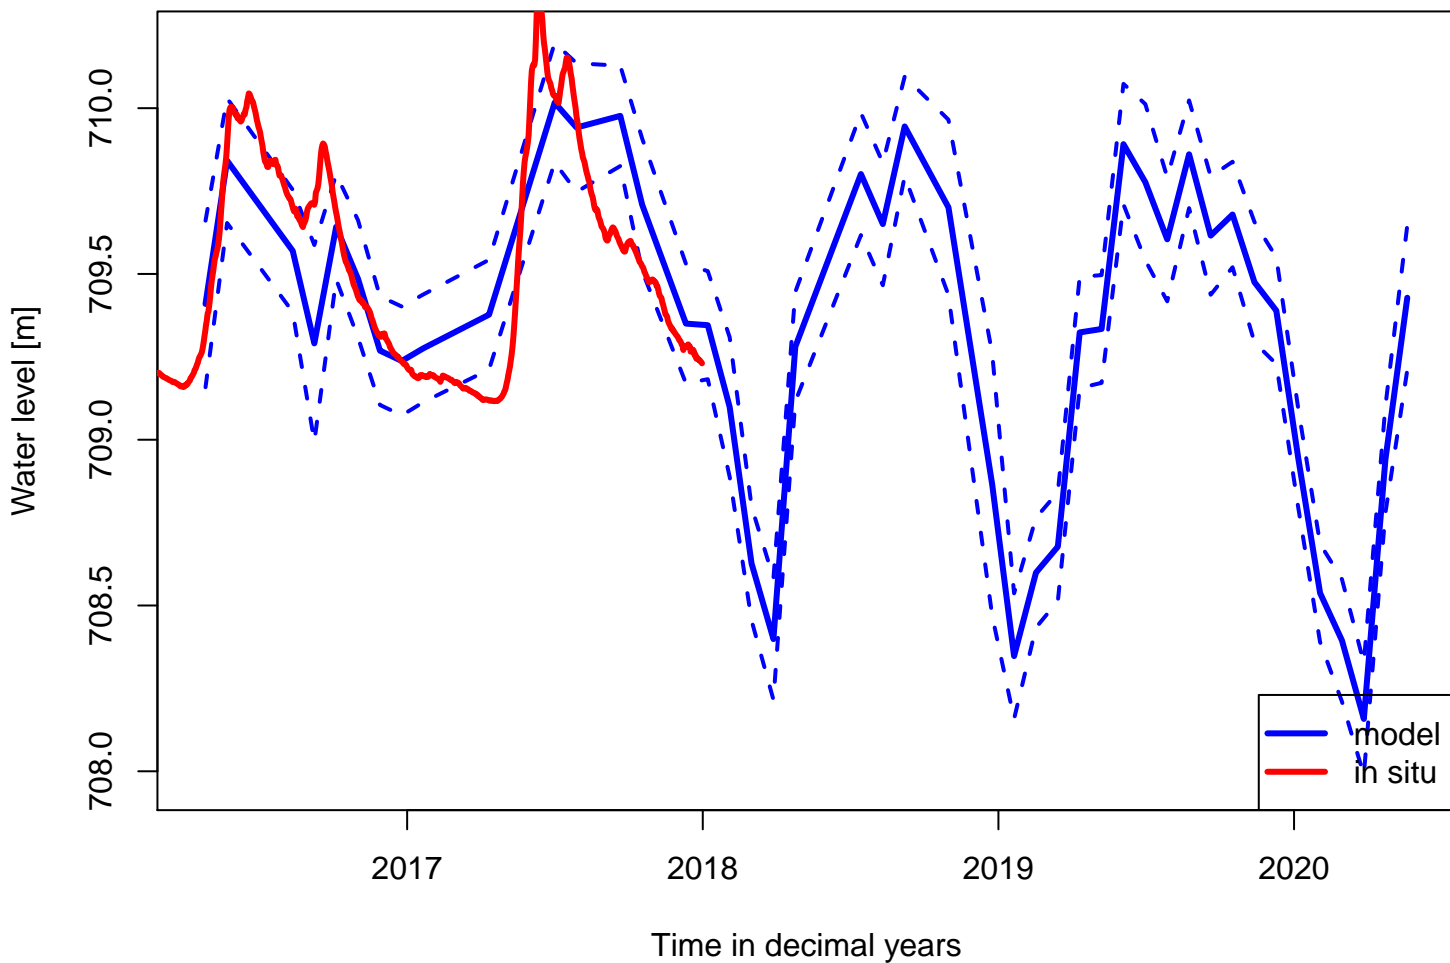

Supplement: s1 [file s1]

**lakename: lakeid: 377 lat: 60.94 lon: -117.4**

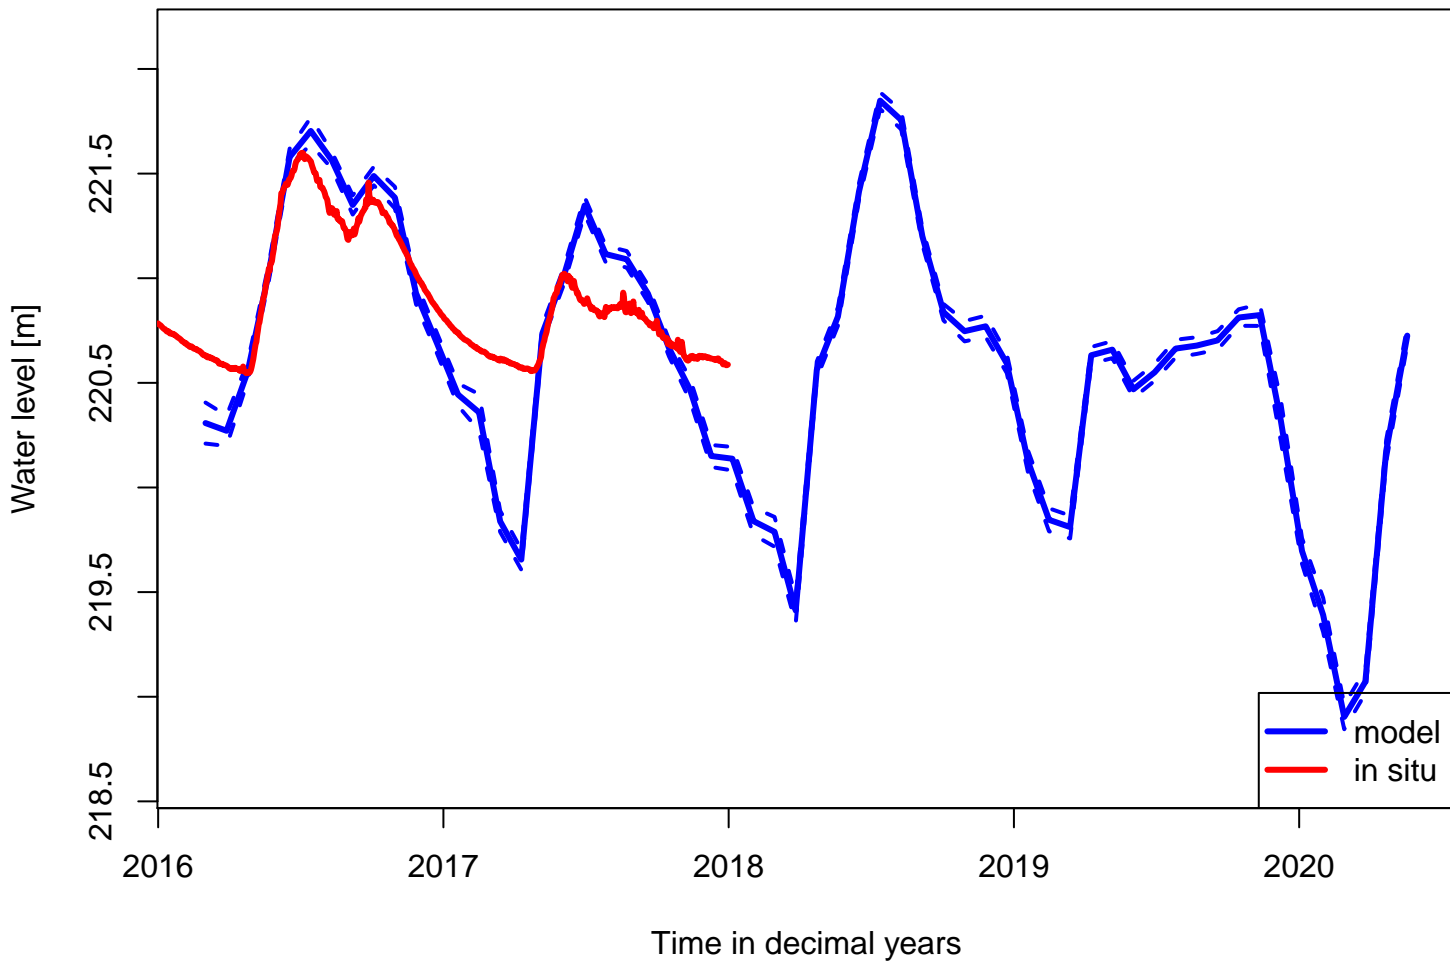

Supplement: s1 [file s1]

**lakename: lakeid: 8822 lat: 45.57 lon: -67.43**

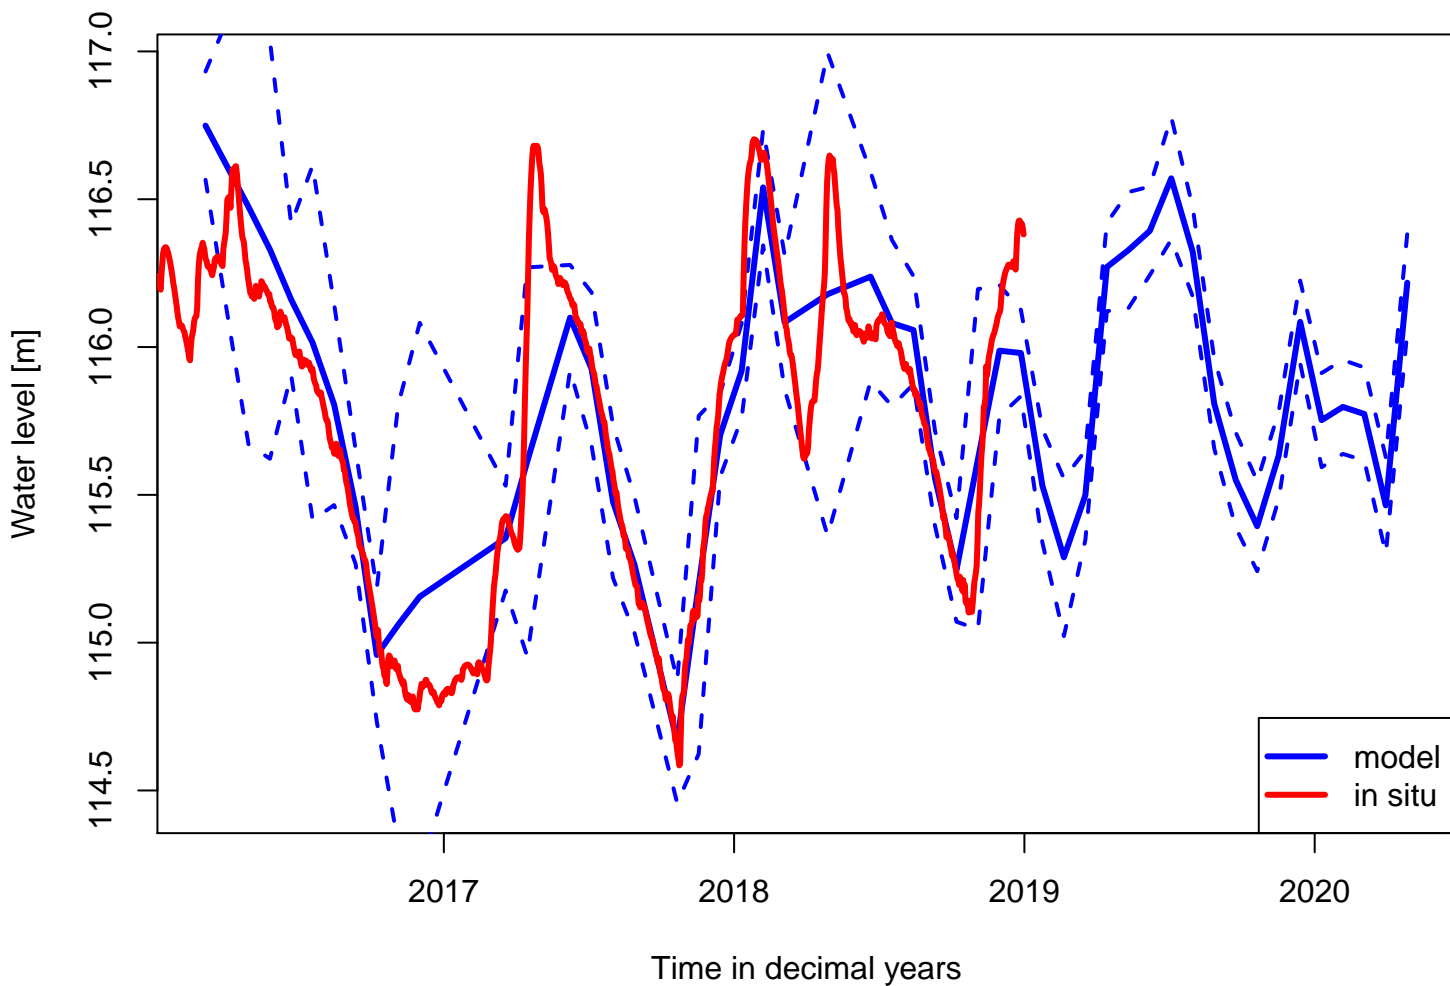

Supplement: s1 [file s1]

**lakename: Kiskittogisu lakeid: 553 lat: 54.44 lon: -98**

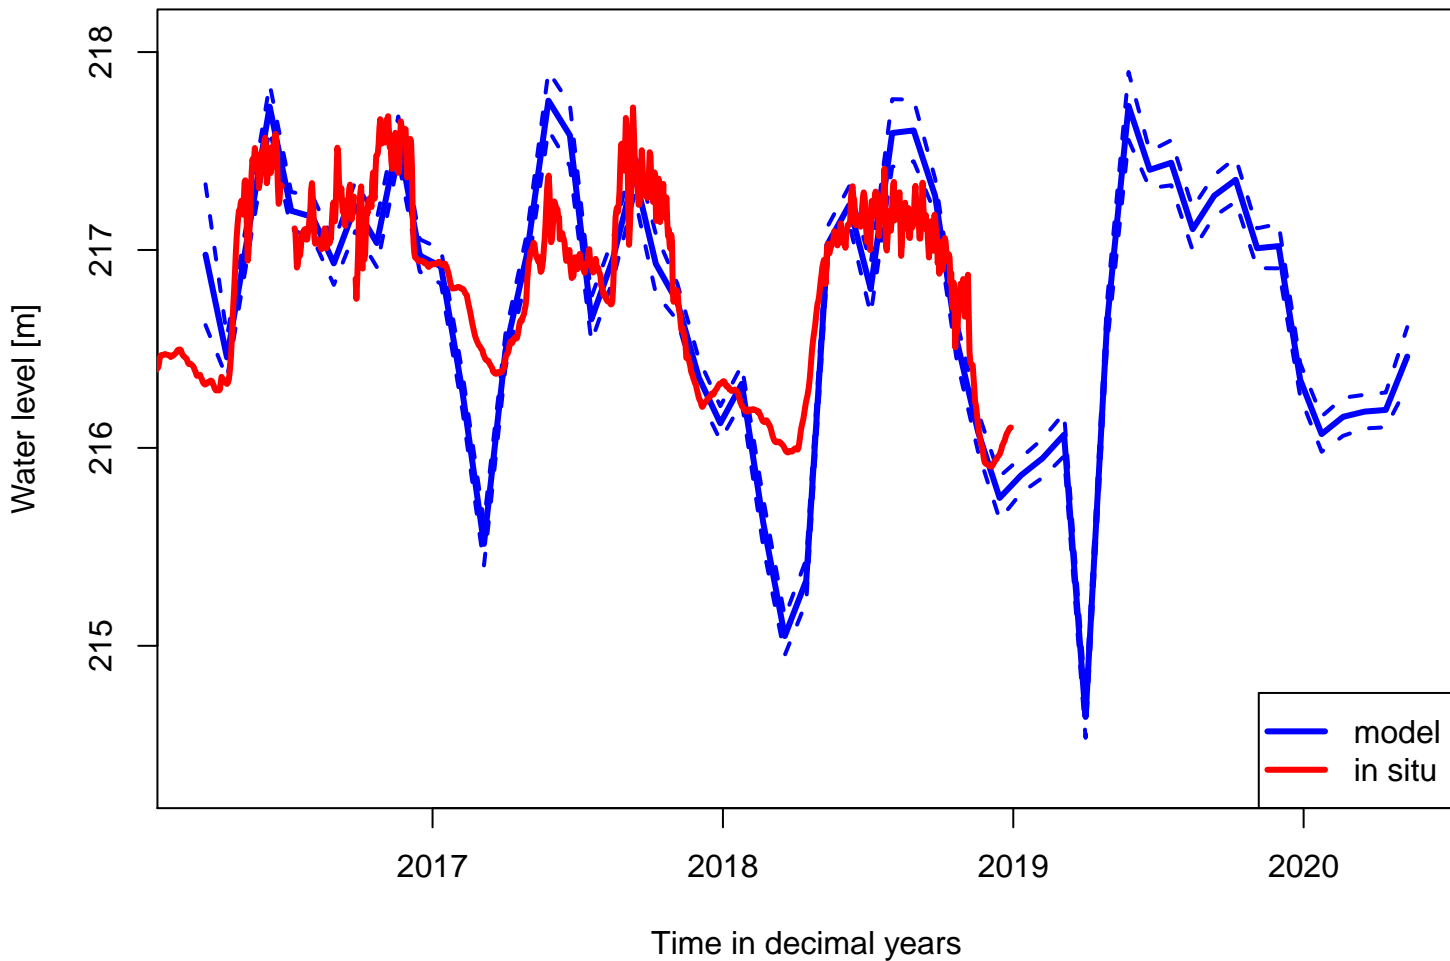

Supplement: s1 [file s1]

**lakename: Nipissing lakeid: 745 lat: 46.13 lon: -80.01**

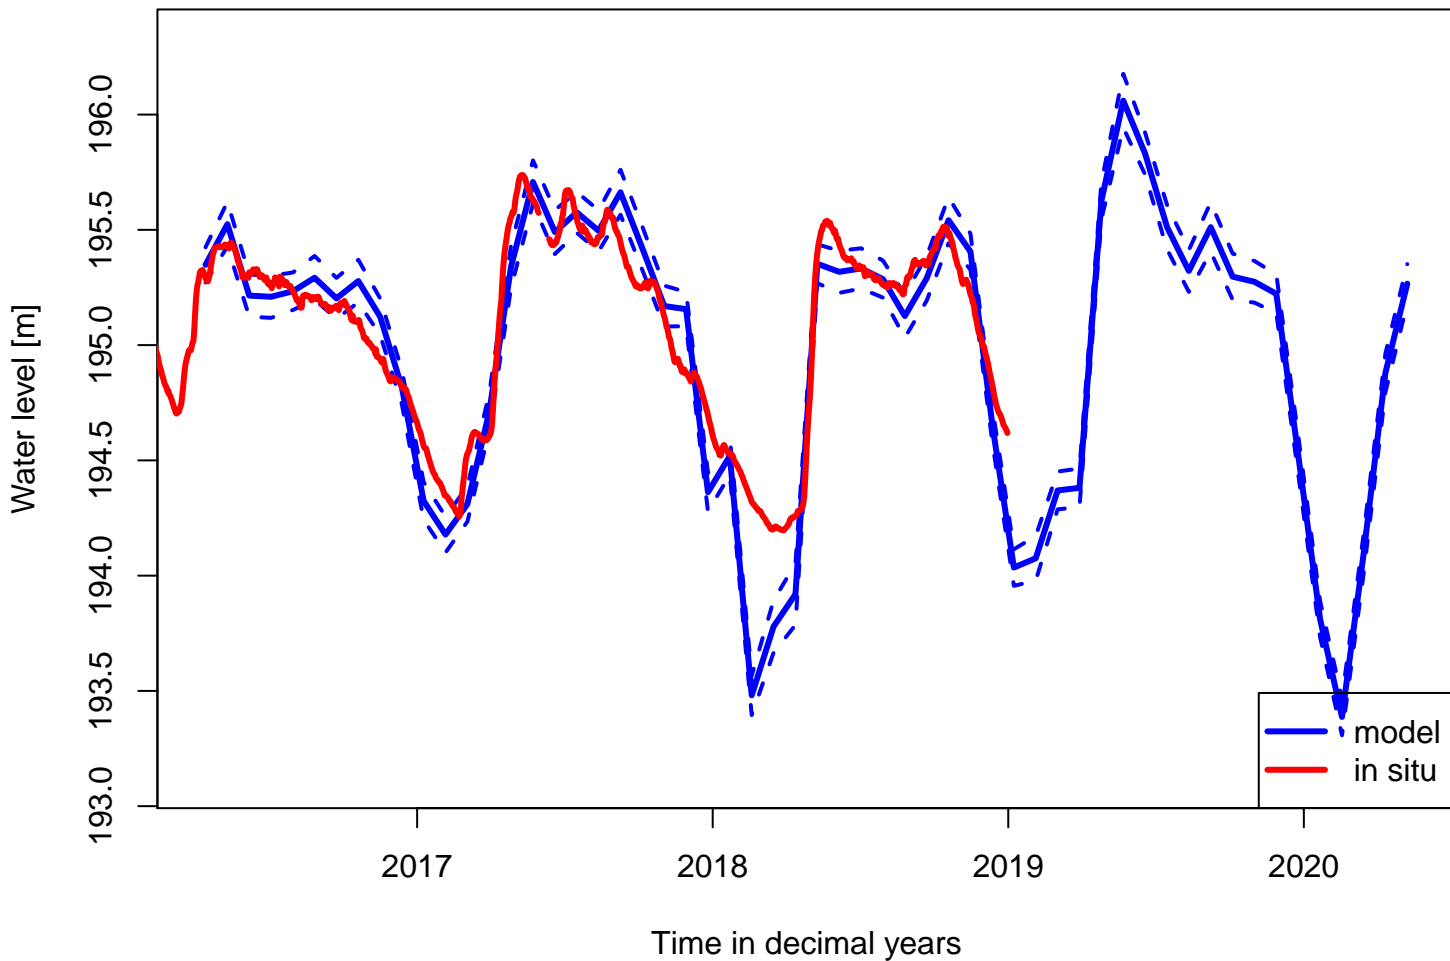

Supplement: s1 [file s1]

**lakename: lakeid: 8842 lat: 45.35 lon: -75.83**

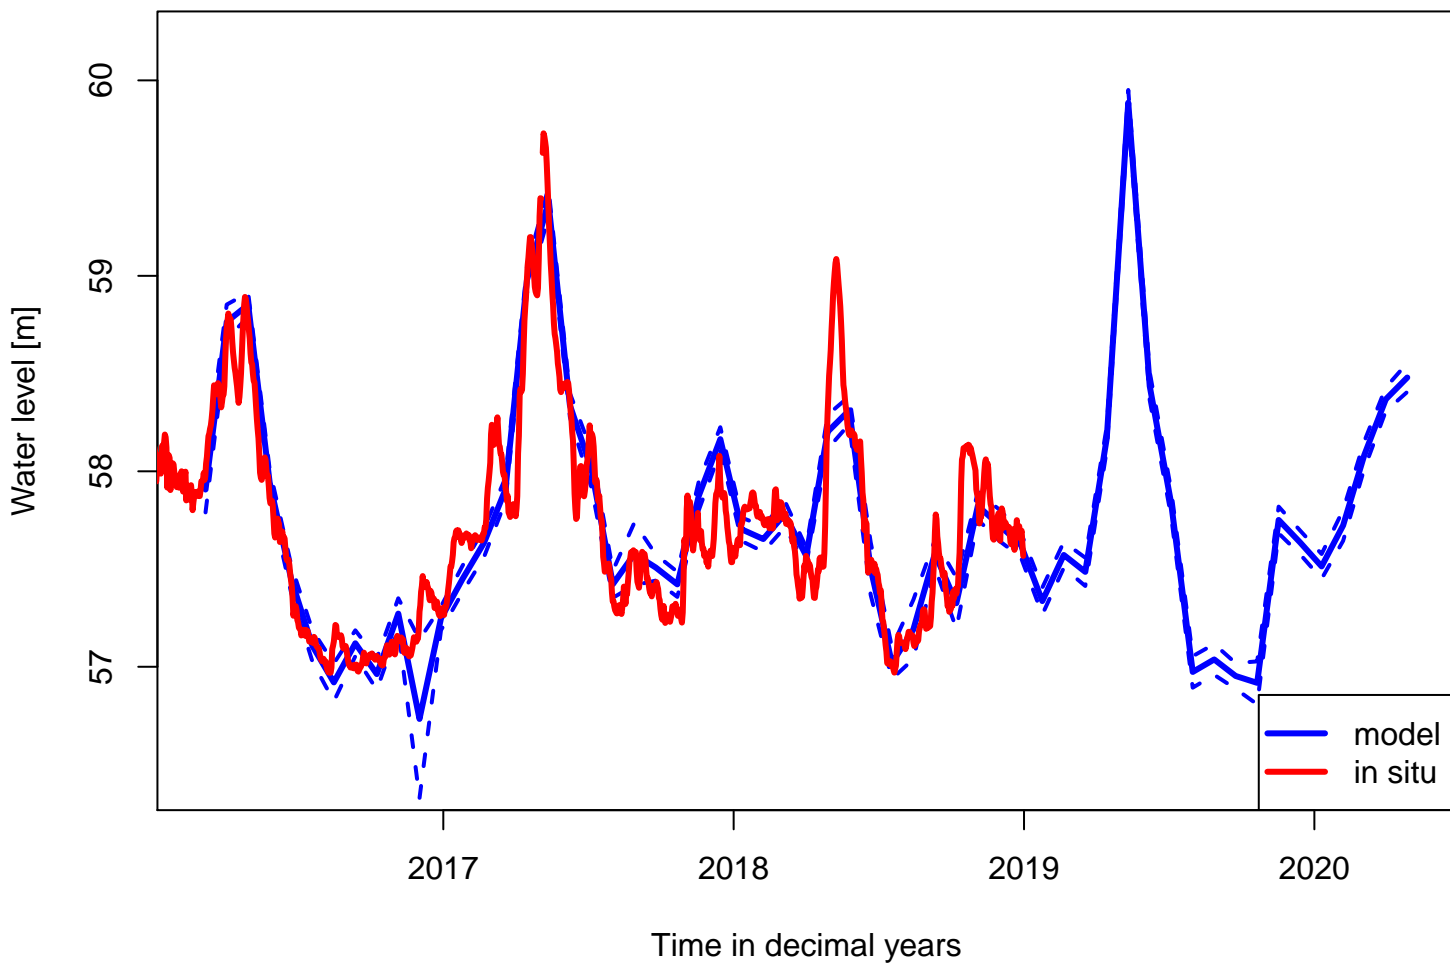

Supplement: s1 [file s1]

**lakename: lakeid: 6846 lat: 53.49 lon: -91.51**

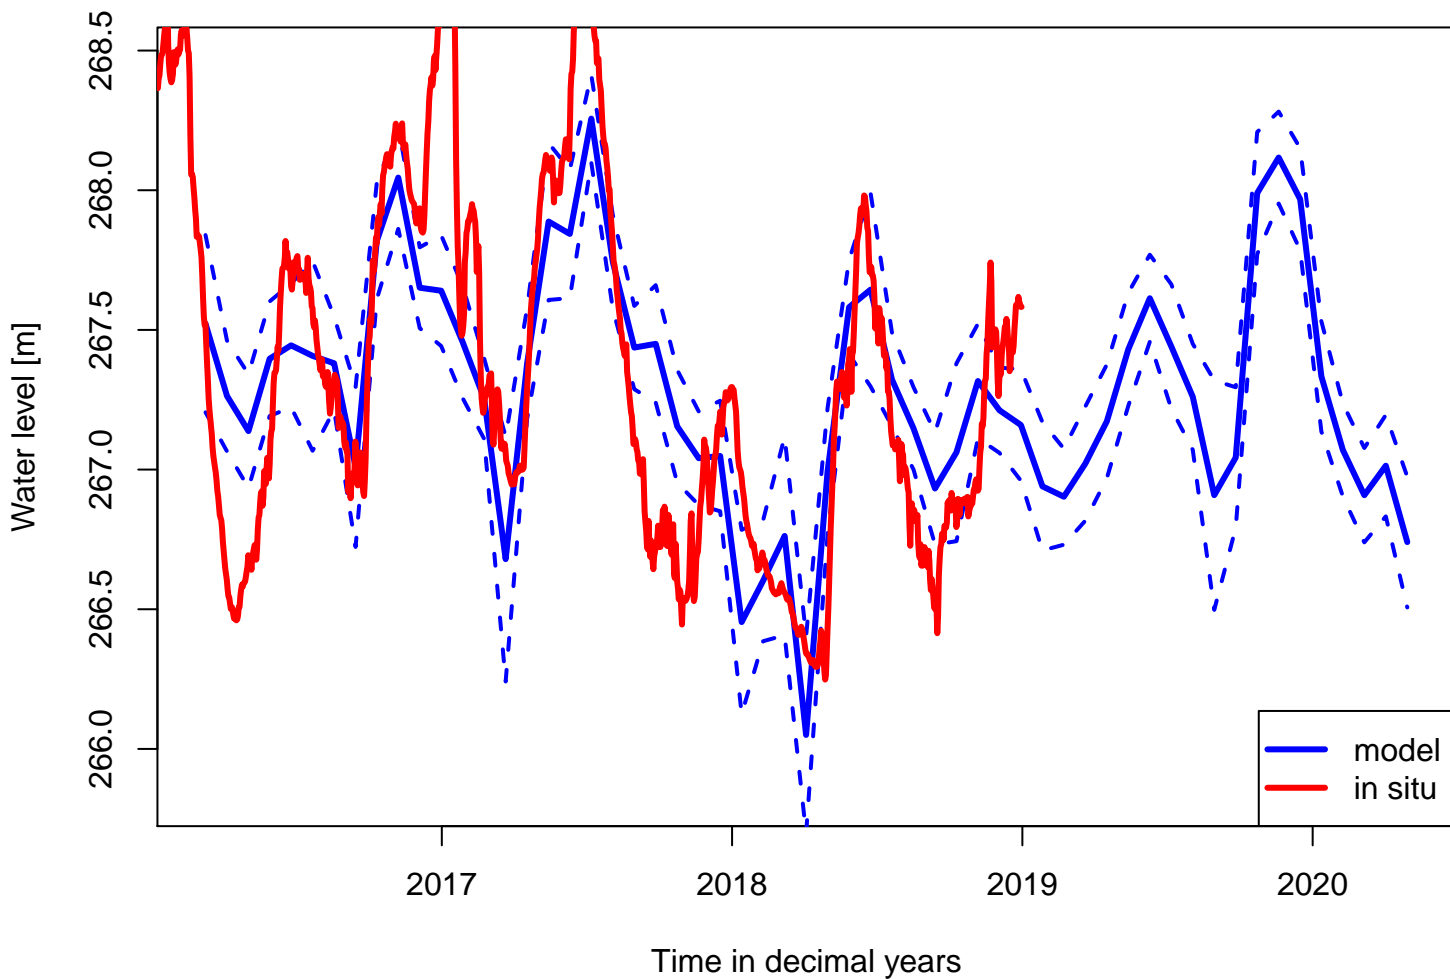

Supplement: s1 [file s1]

**lakename: Quesnel lakeid: 619 lat: 52.57 lon: -121.5**

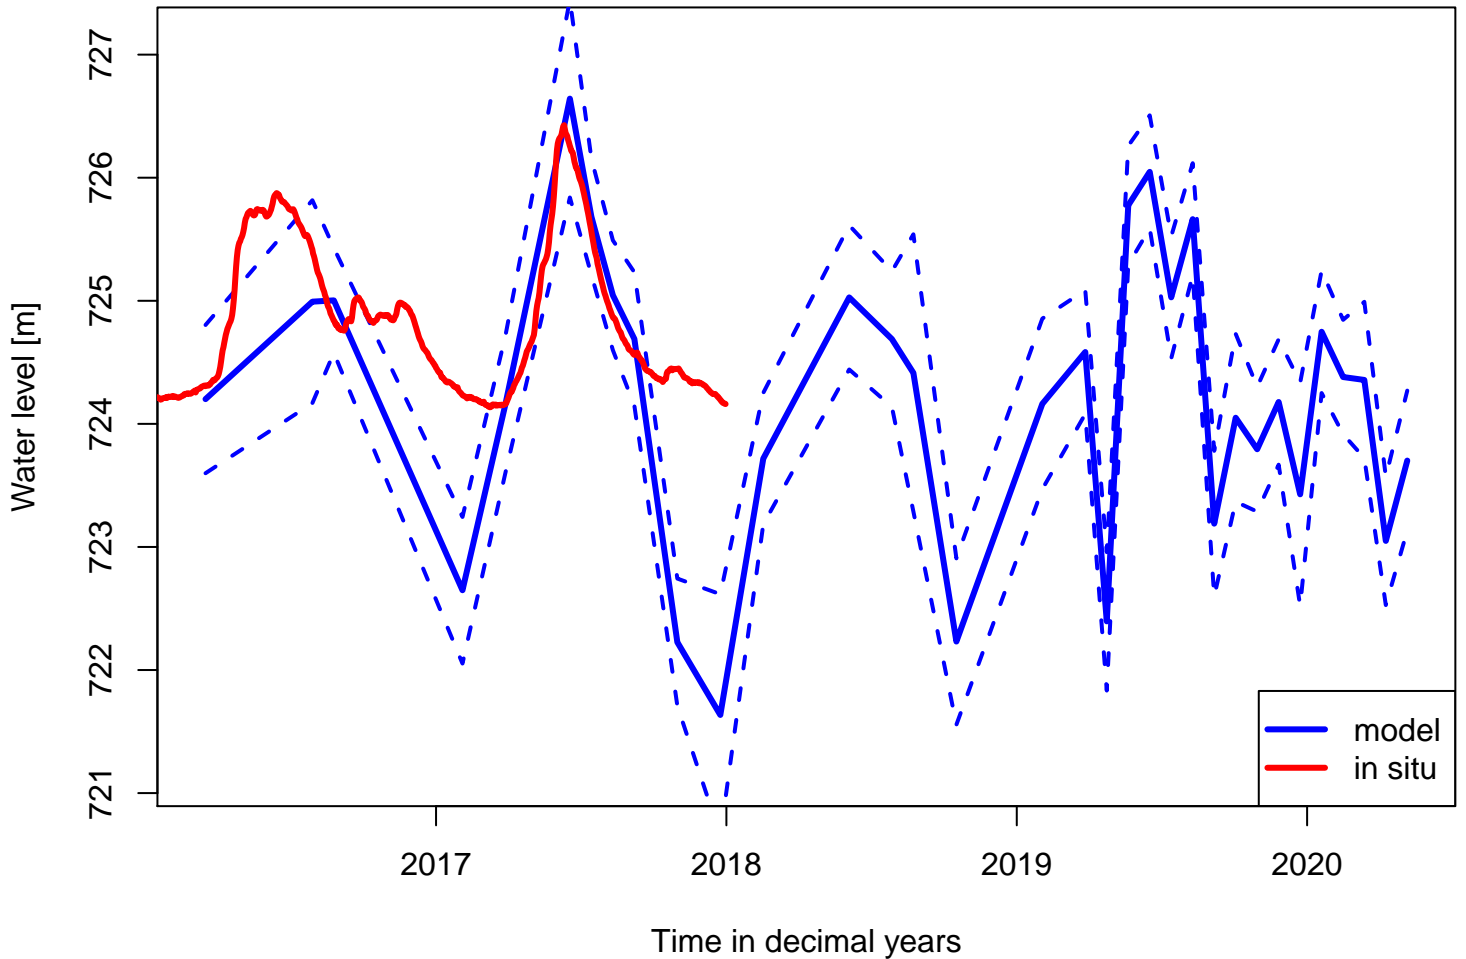

Supplement: s1 [file s1]

**lakename: Calcasieu Lake lakeid: 844 lat: 30.03 lon: -93.3**

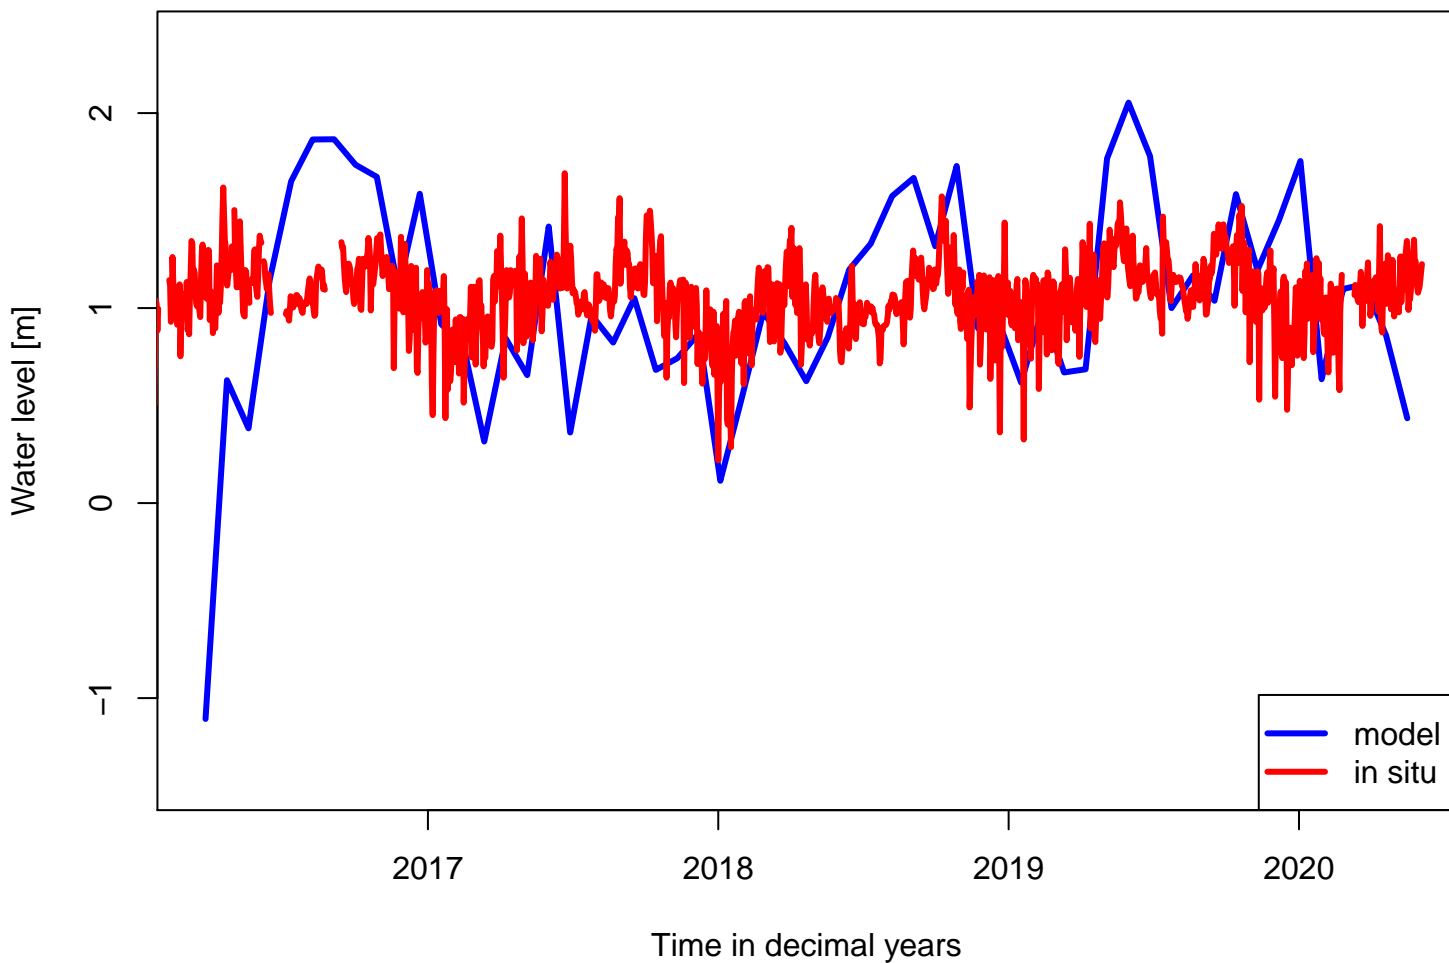

Supplement: s1 [file s1]

**lakename: lakeid: 6545 lat: 54.16 lon: -110.7**

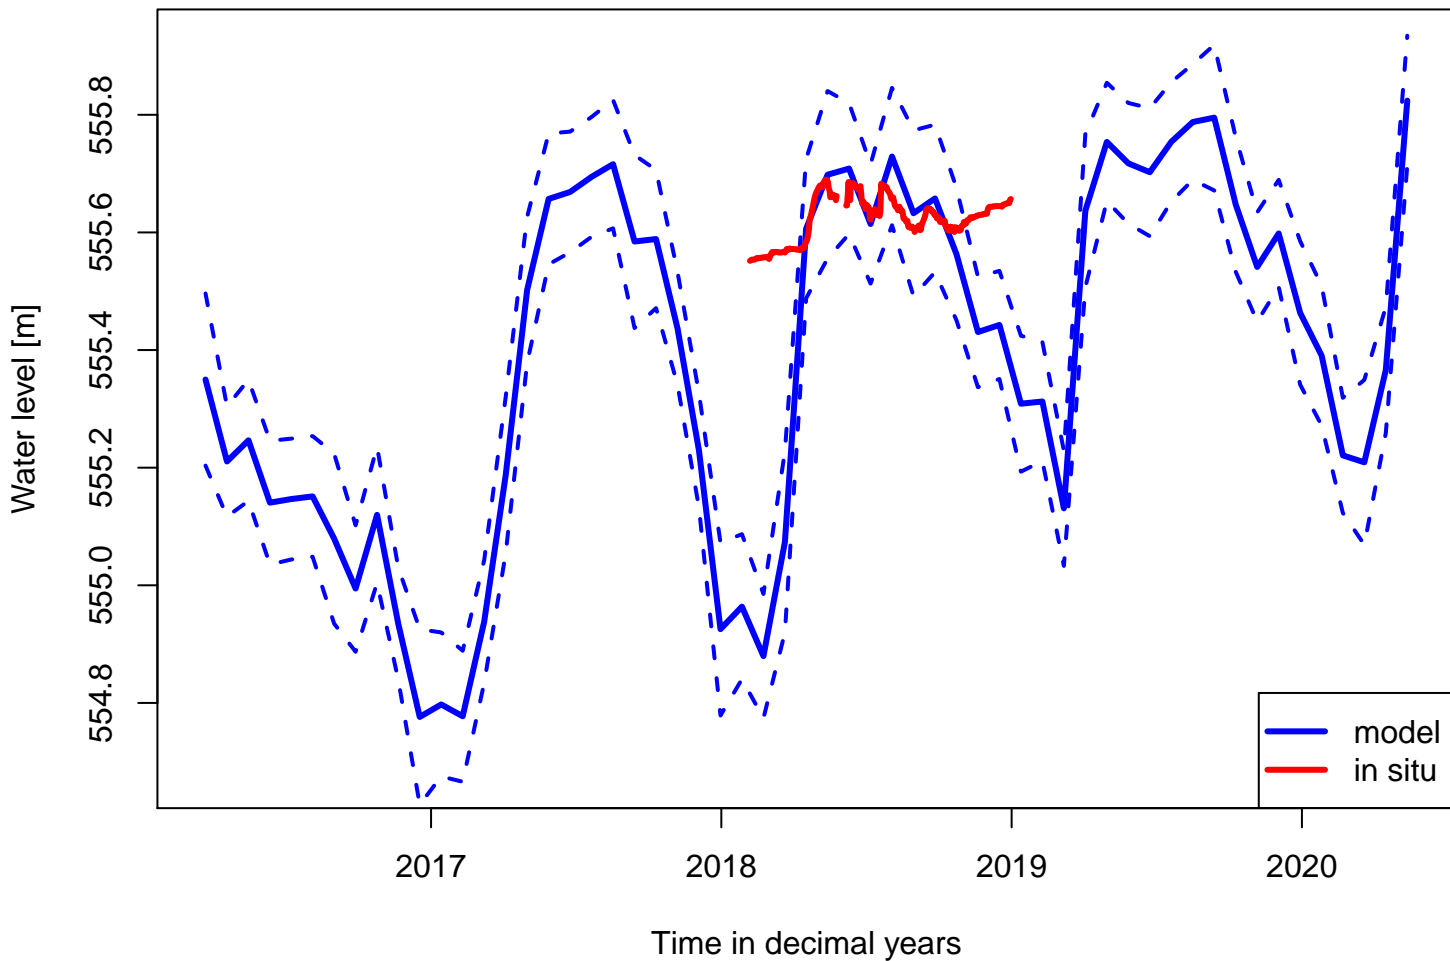

Supplement: s1 [file s1]

**lakename: Teslin lakeid: 394 lat: 60.16 lon: -132.7**

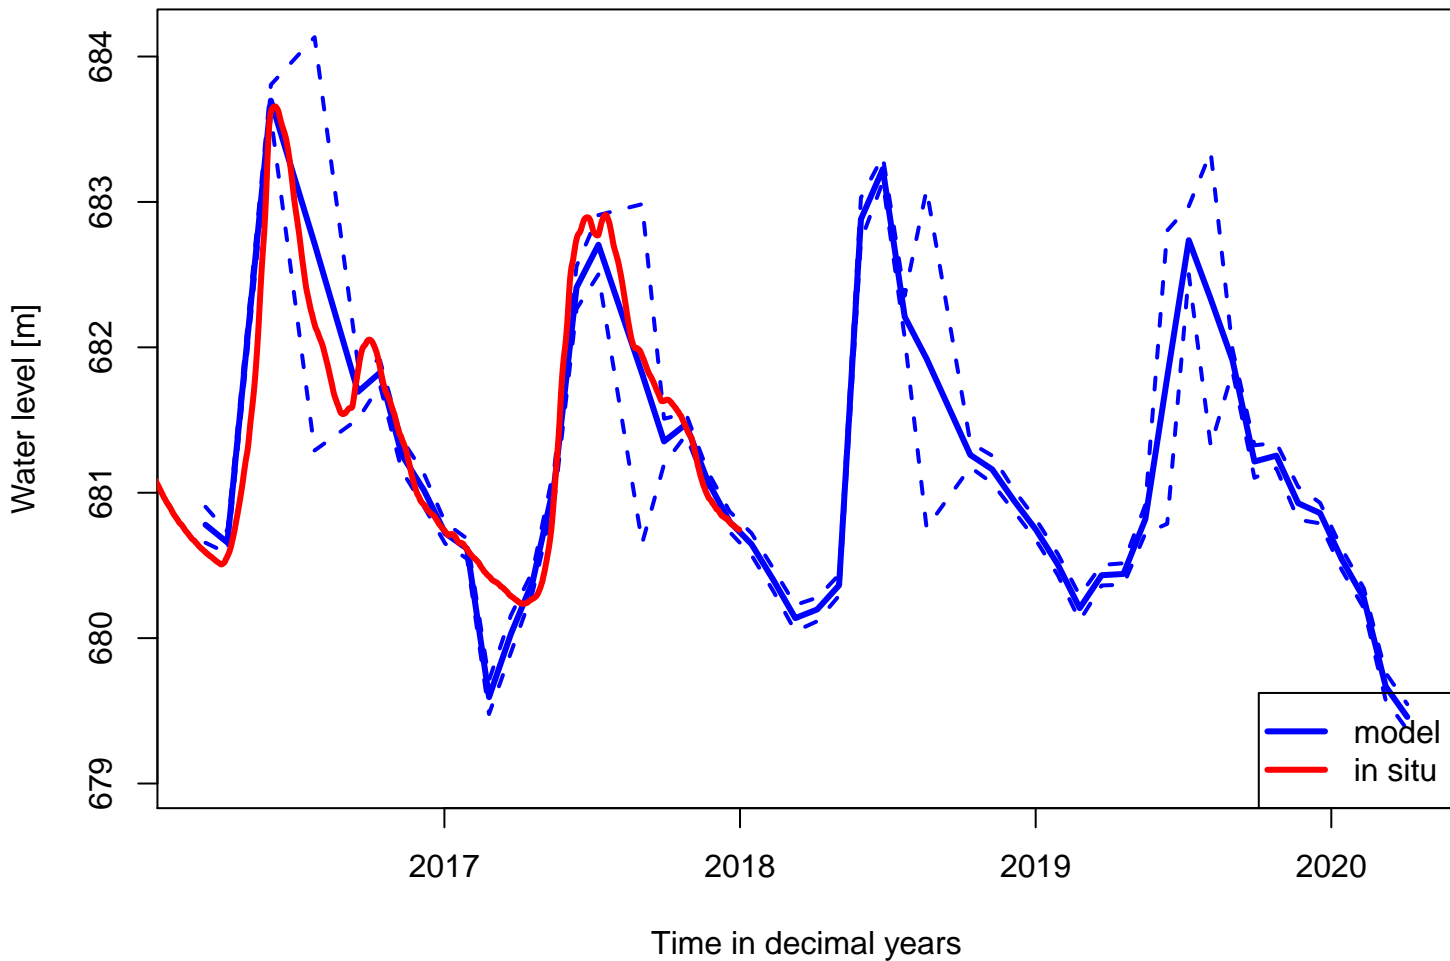

Supplement: s1 [file s1]

**lakename: lakeid: 5886 lat: 56.01 lon: -103.3**

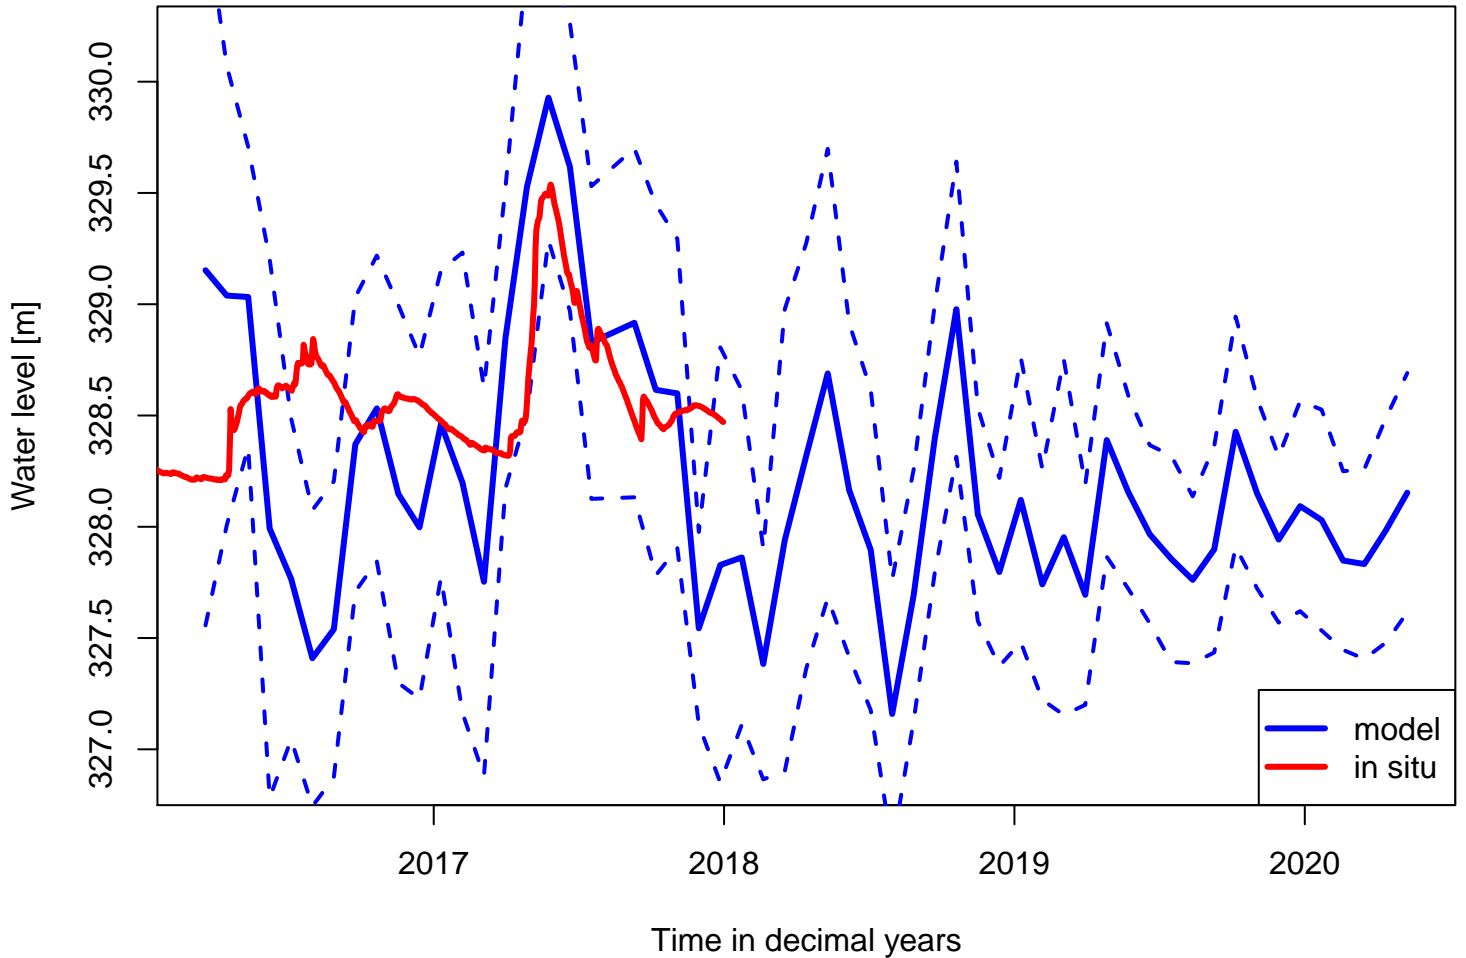

Supplement: s1 [file s1]

**lakename: Kinbasket lakeid: 628 lat: 51.89 lon: -117.9**

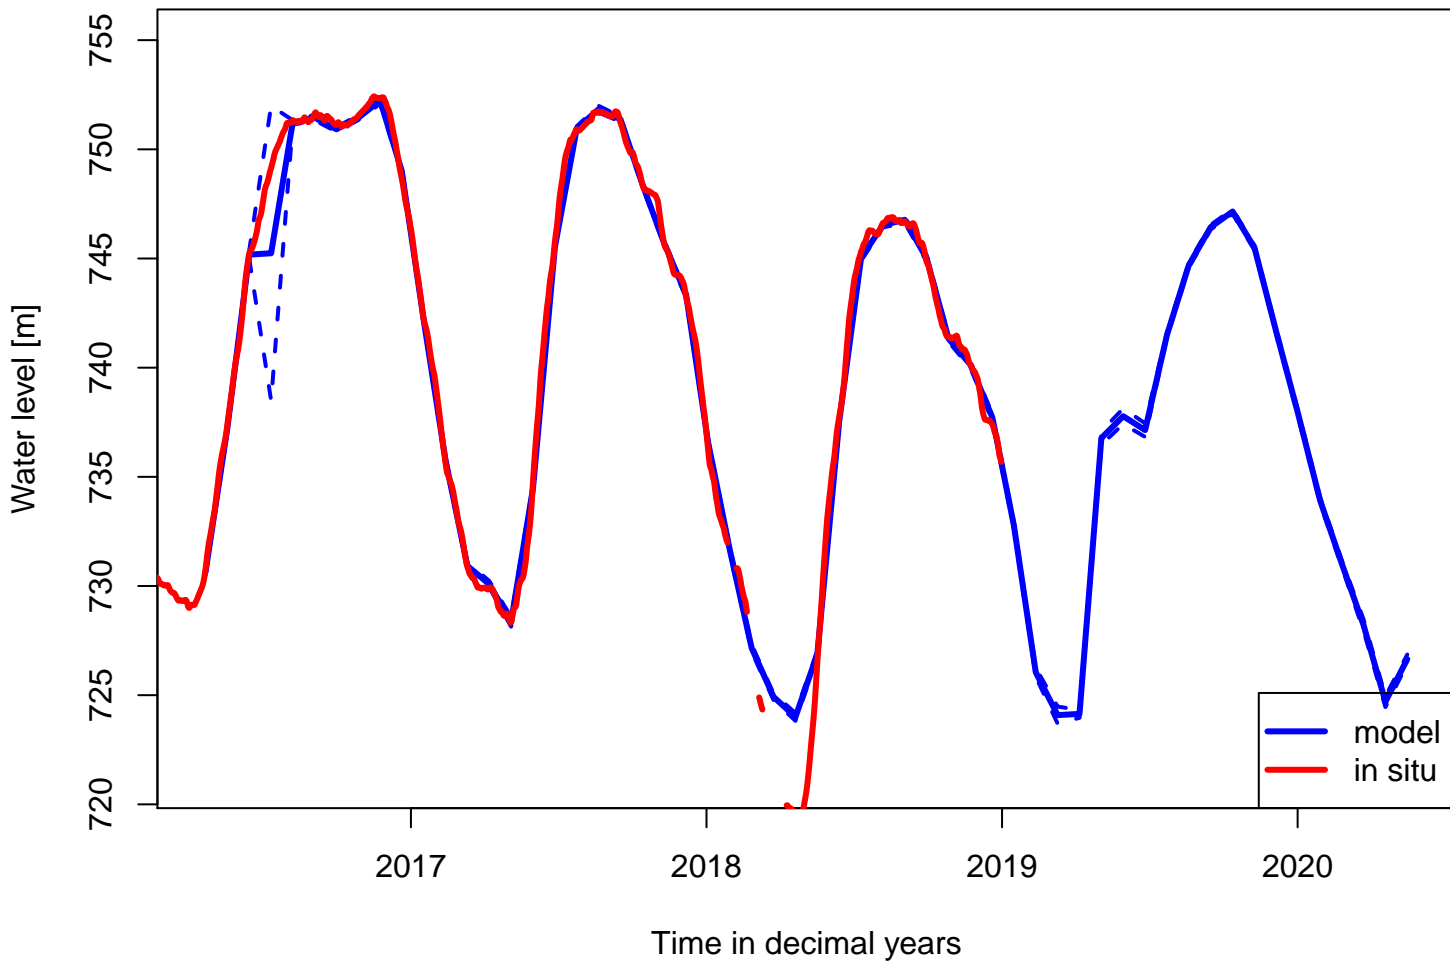

Supplement: s1 [file s1]

**lakename: Pend Oreille Lake lakeid: 719 lat: 48.28 lon: -116.3**

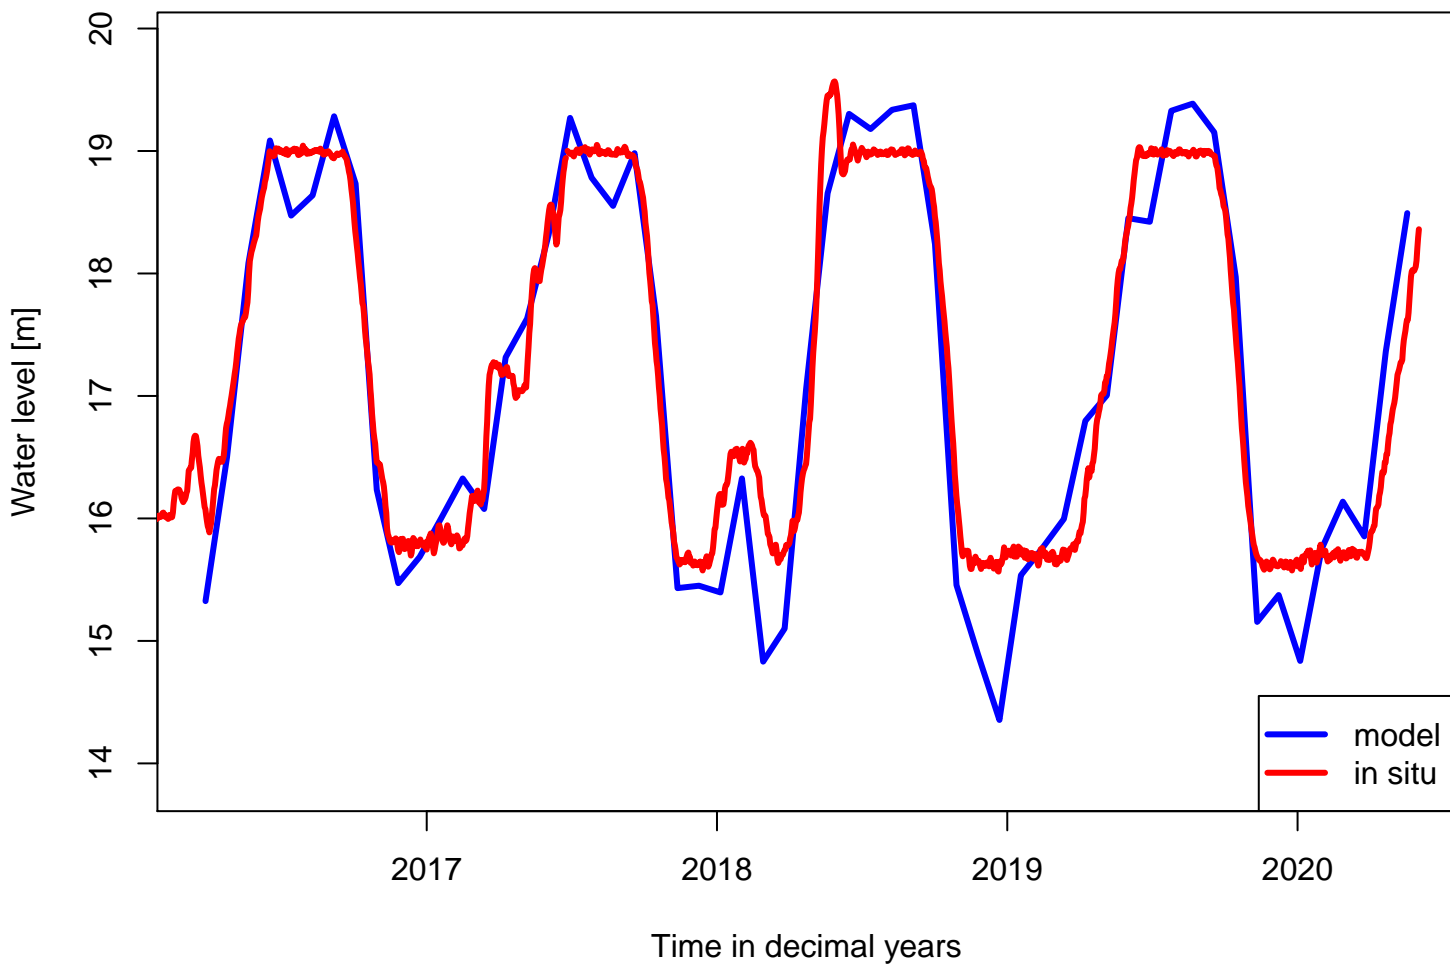

Supplement: s1 [file s1]

**lakename: Egg lakeid: 527 lat: 55.09 lon: -105.4**

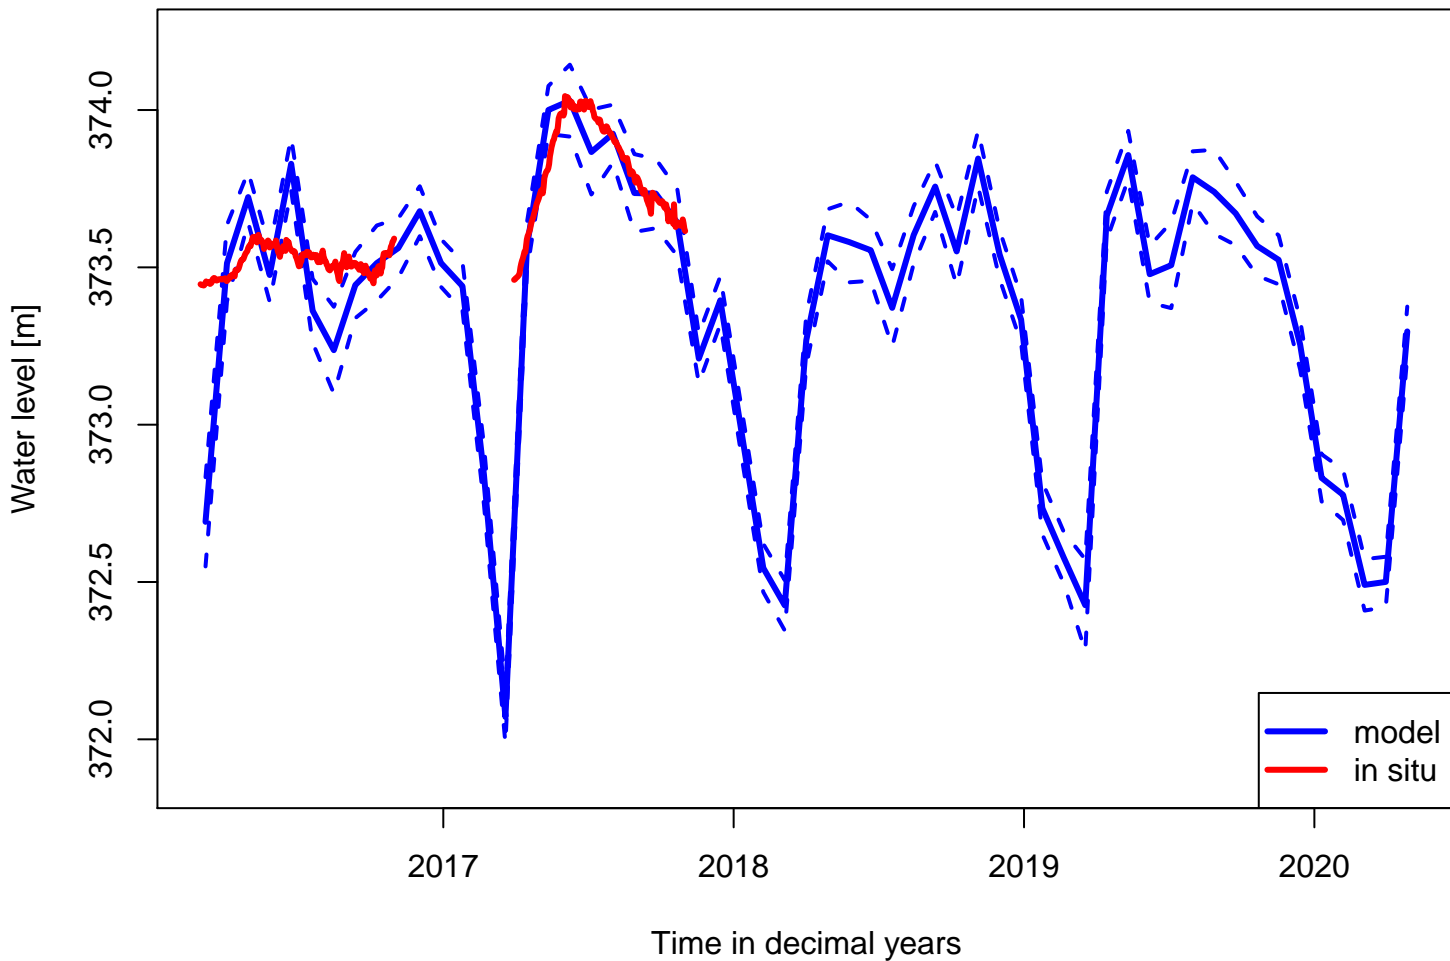

Supplement: s1 [file s1]

**lakename: Kootenay lakeid: 696 lat: 49.3 lon: -116.7**

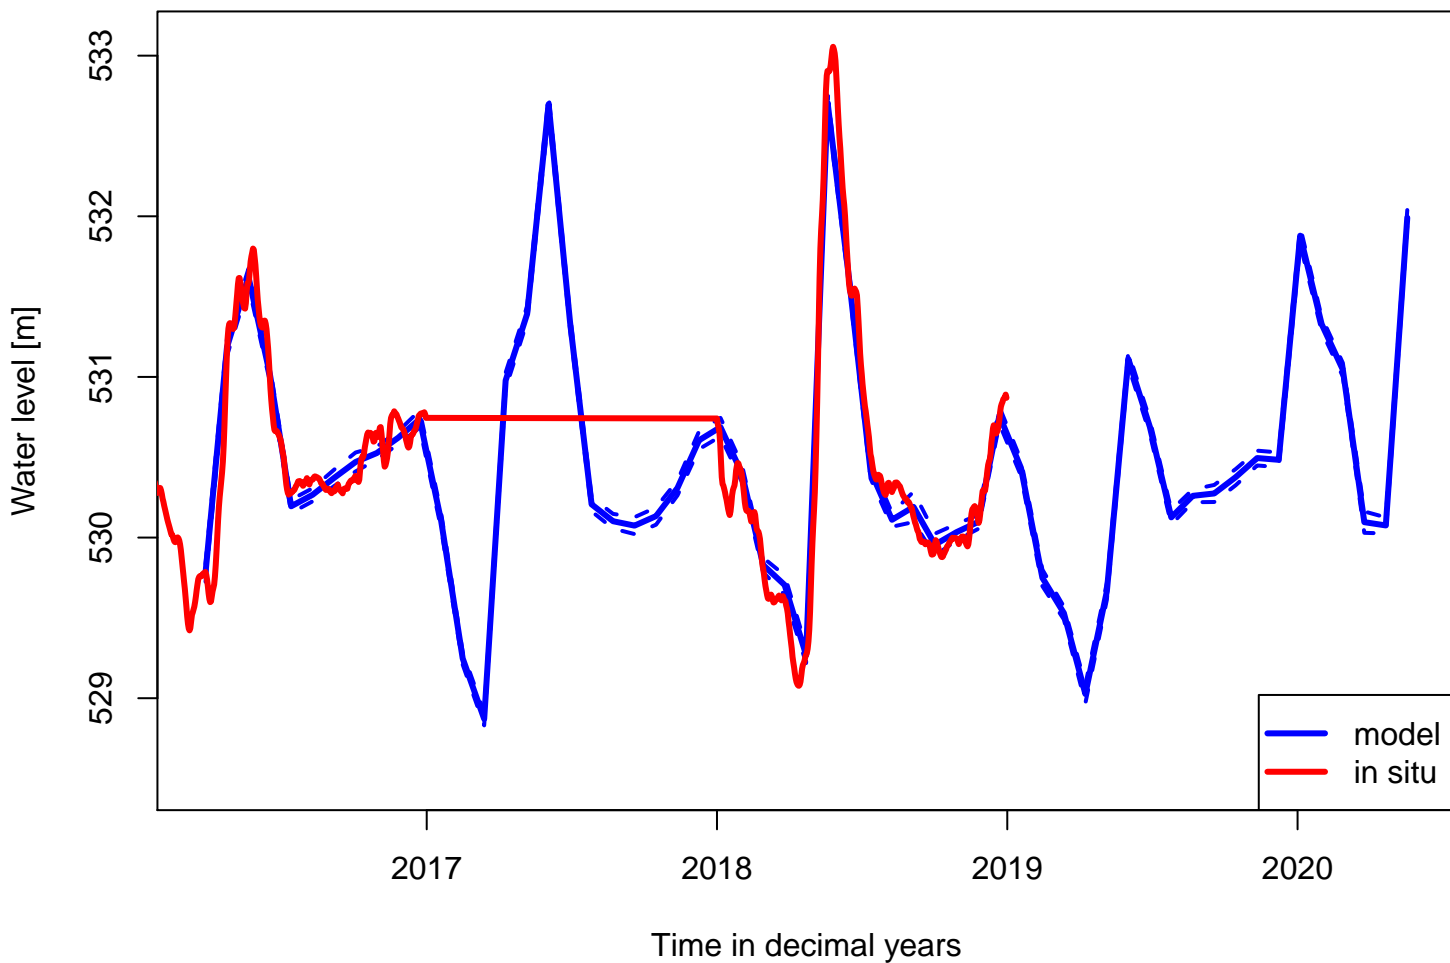

Supplement: s1 [file s1]
