# Supplementary material (part 4 of 5)
Source: MDPI journal article supplement (https://www.mdpi.com/2072-4292/12/17/2835)

**lakename: lakeid: 749 lat: 45.82 lon: -77.13**

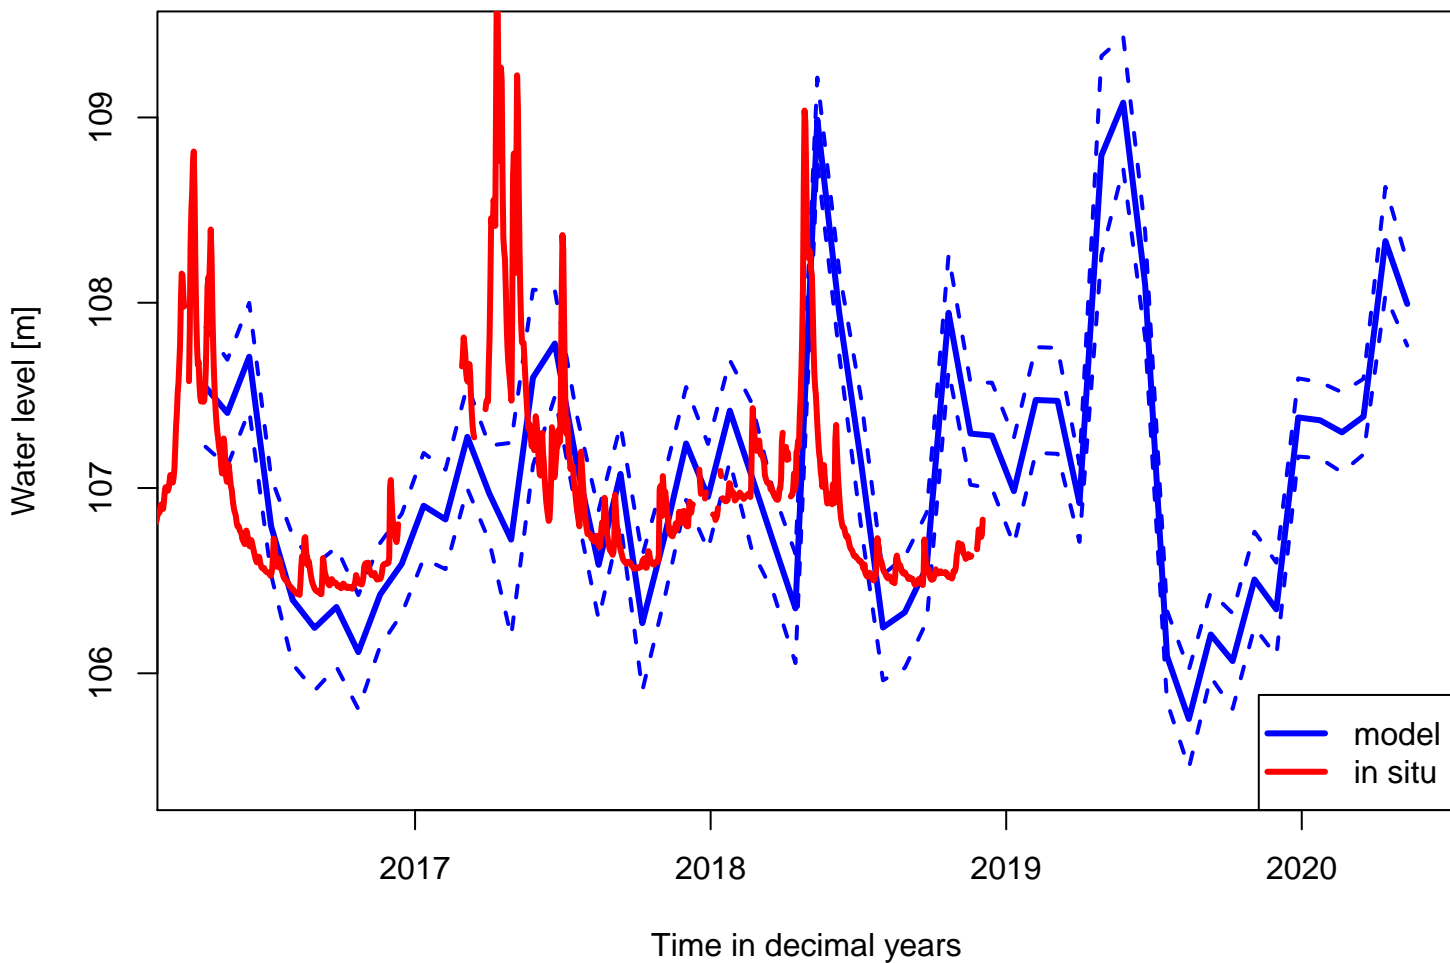

Supplement: s1 [file s1]

**lakename: lakeid: 8842 lat: 45.35 lon: -75.83**

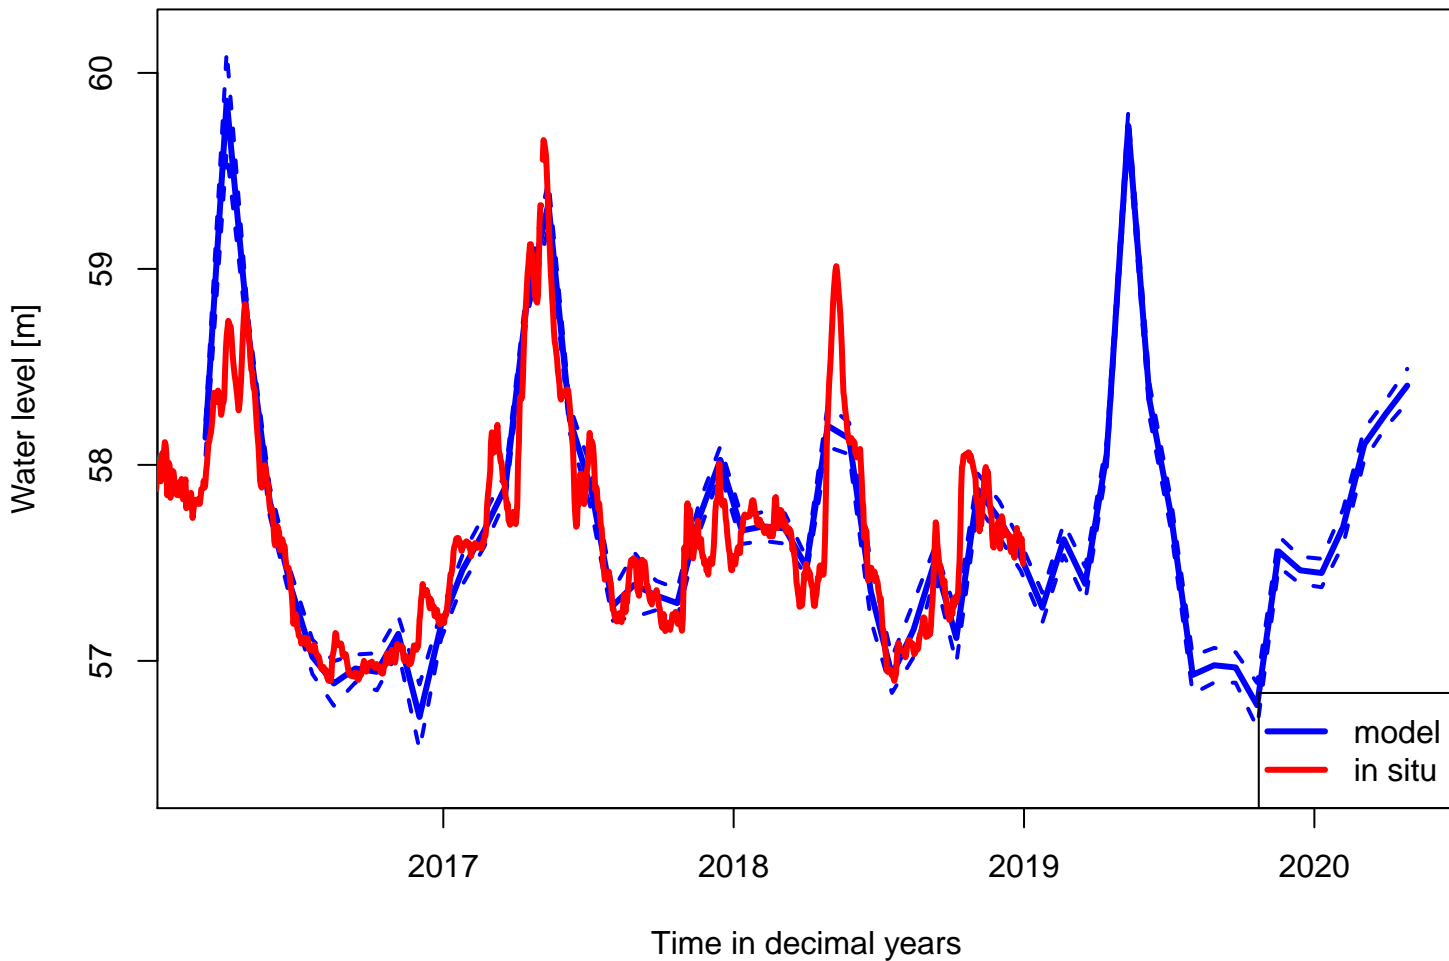

Supplement: s1 [file s1]

**lakename: lakeid: 7936 lat: 49.99 lon: -94.66**

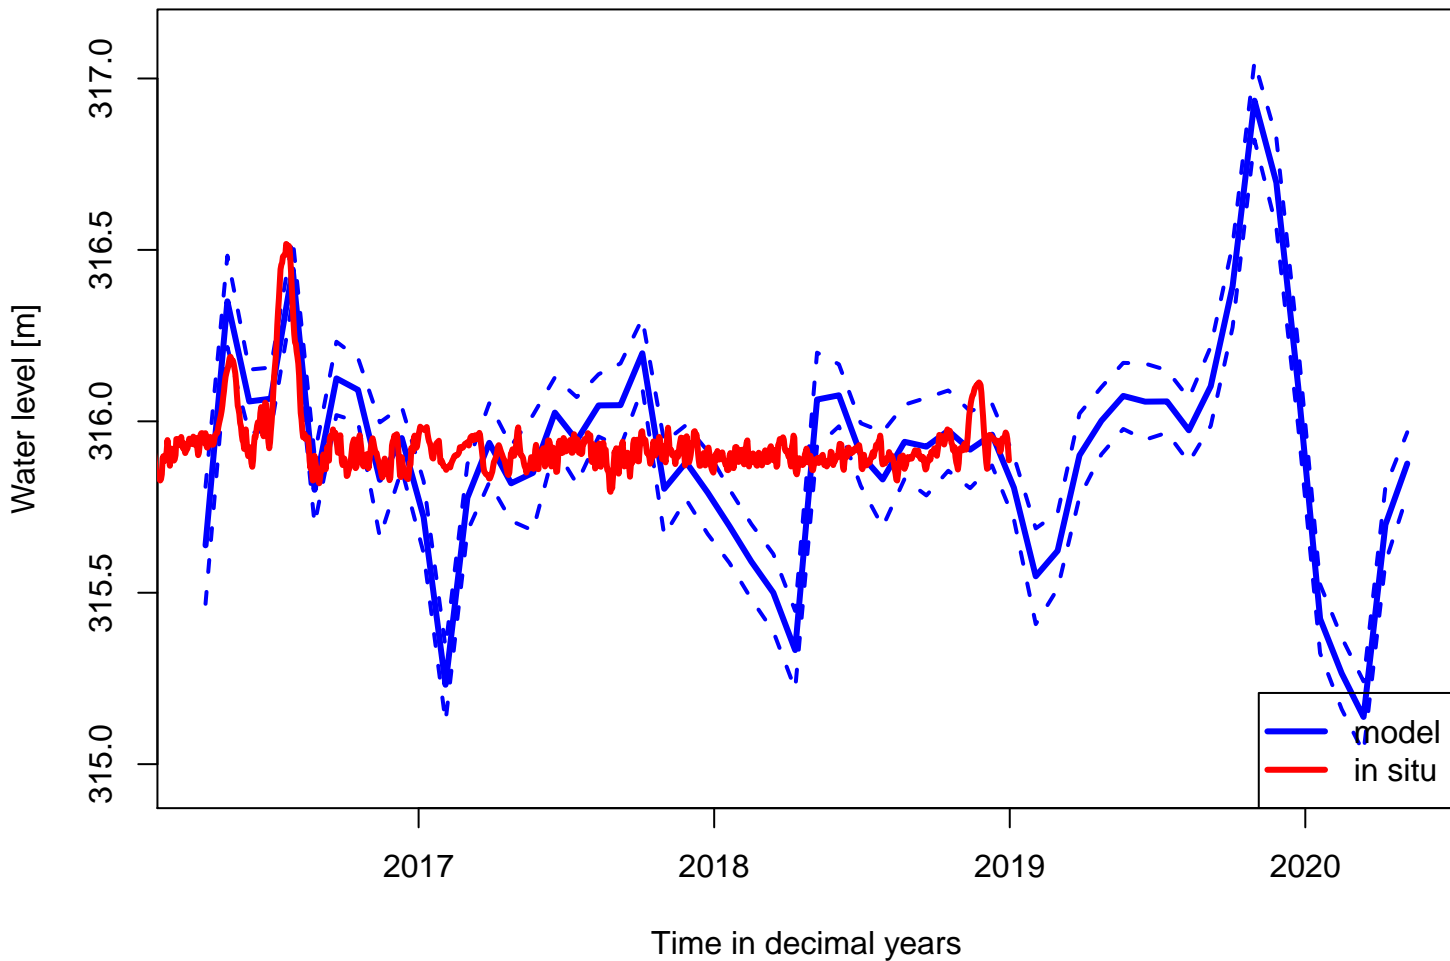

Supplement: s1 [file s1]

**lakename: Cedar lakeid: 51 lat: 53.32 lon: -100.3**

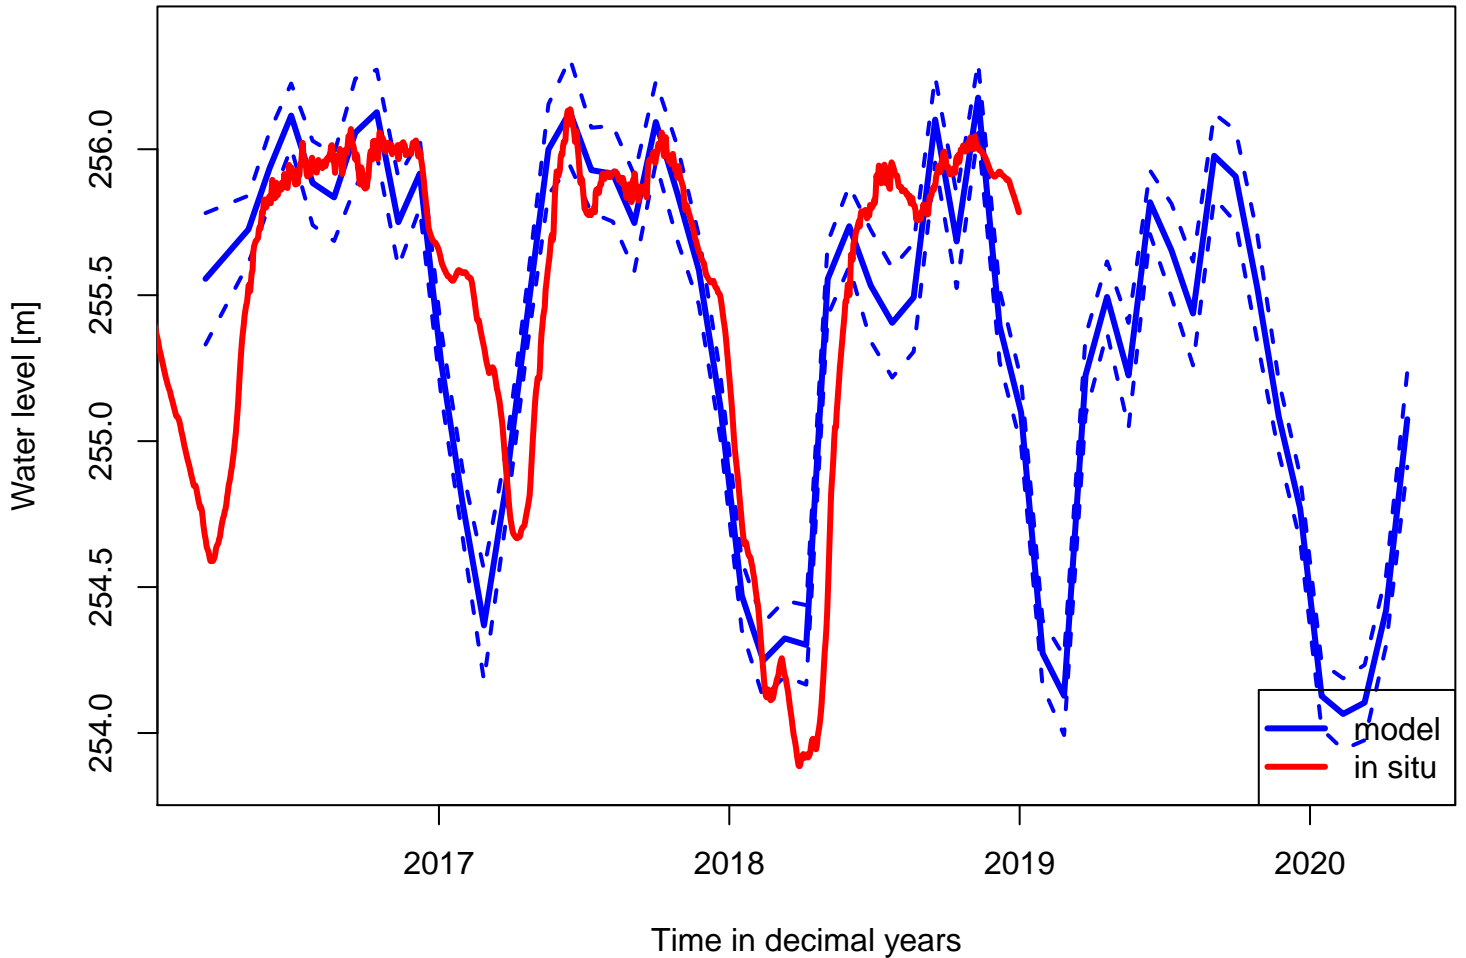

Supplement: s1 [file s1]

**lakename: Rathbun Lake lakeid: 9169 lat: 40.83 lon: -92.89**

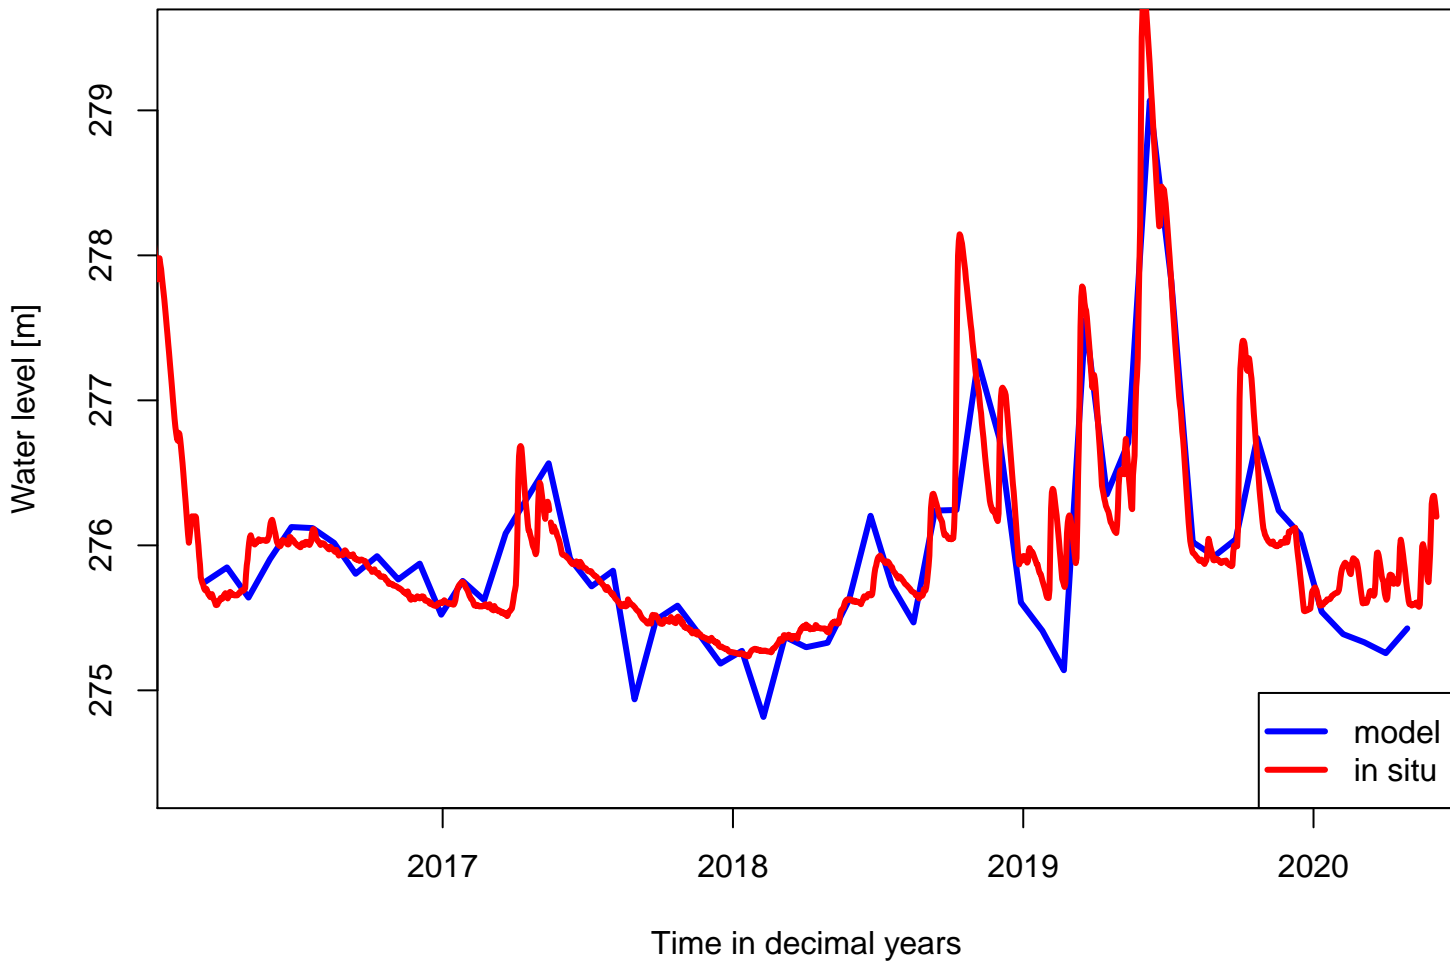

Supplement: s1 [file s1]

**lakename: Kiskittogisu lakeid: 553 lat: 54.44 lon: -98**

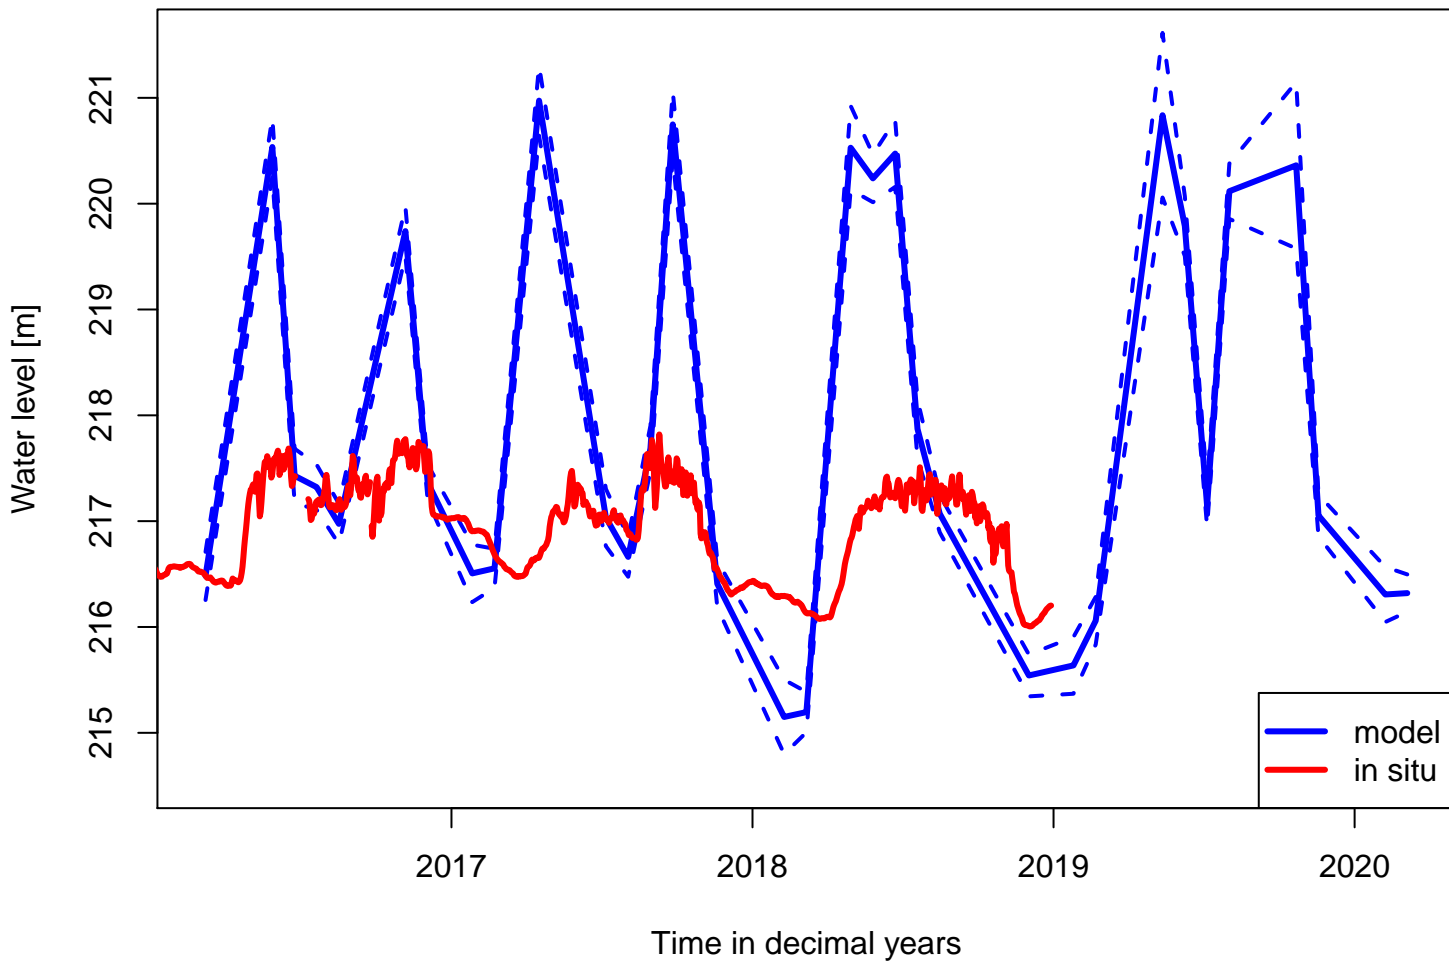

Supplement: s1 [file s1]

**lakename: Atikonak lakeid: 607 lat: 52.97 lon: -64.66**

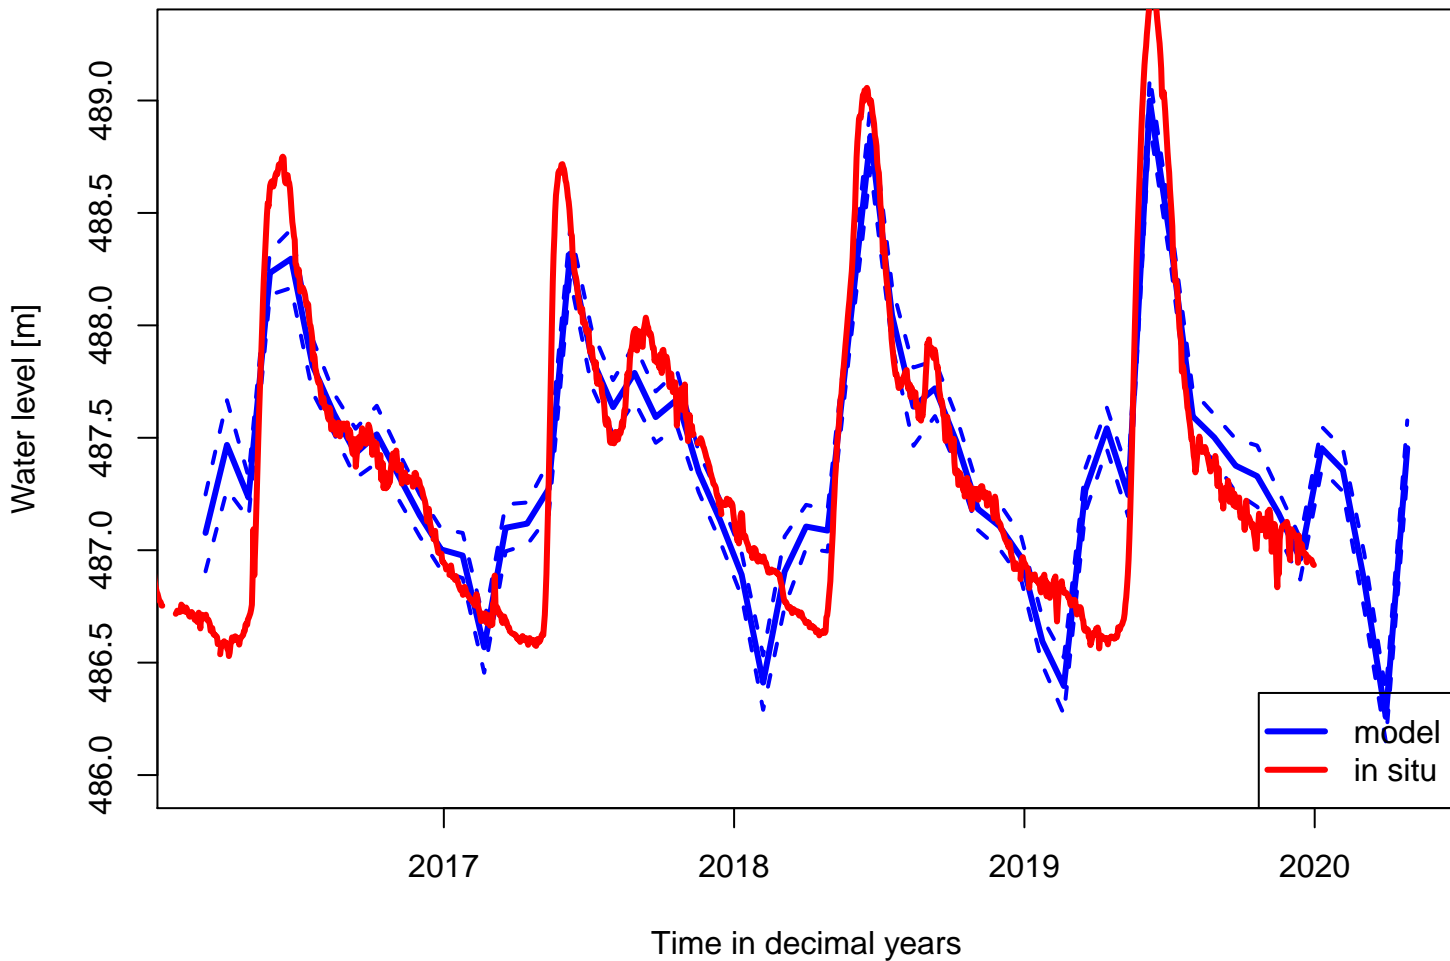

Supplement: s1 [file s1]

**lakename: Ennadai lakeid: 370 lat: 61.11 lon: -101**

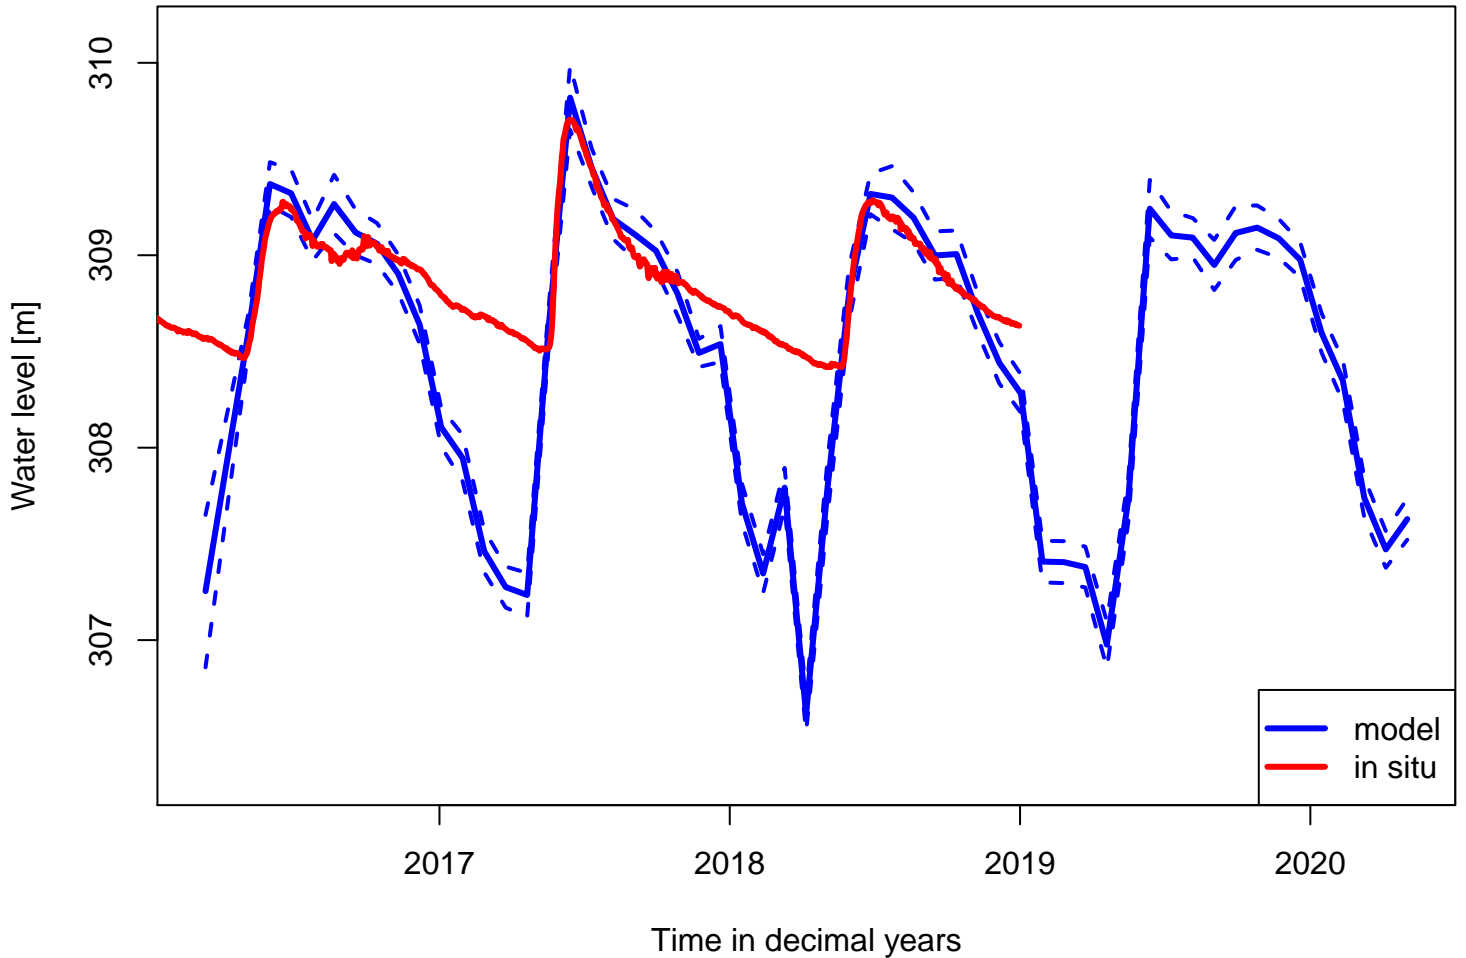

Supplement: s1 [file s1]

**lakename: Tazin lakeid: 412 lat: 59.82 lon: -109.4**

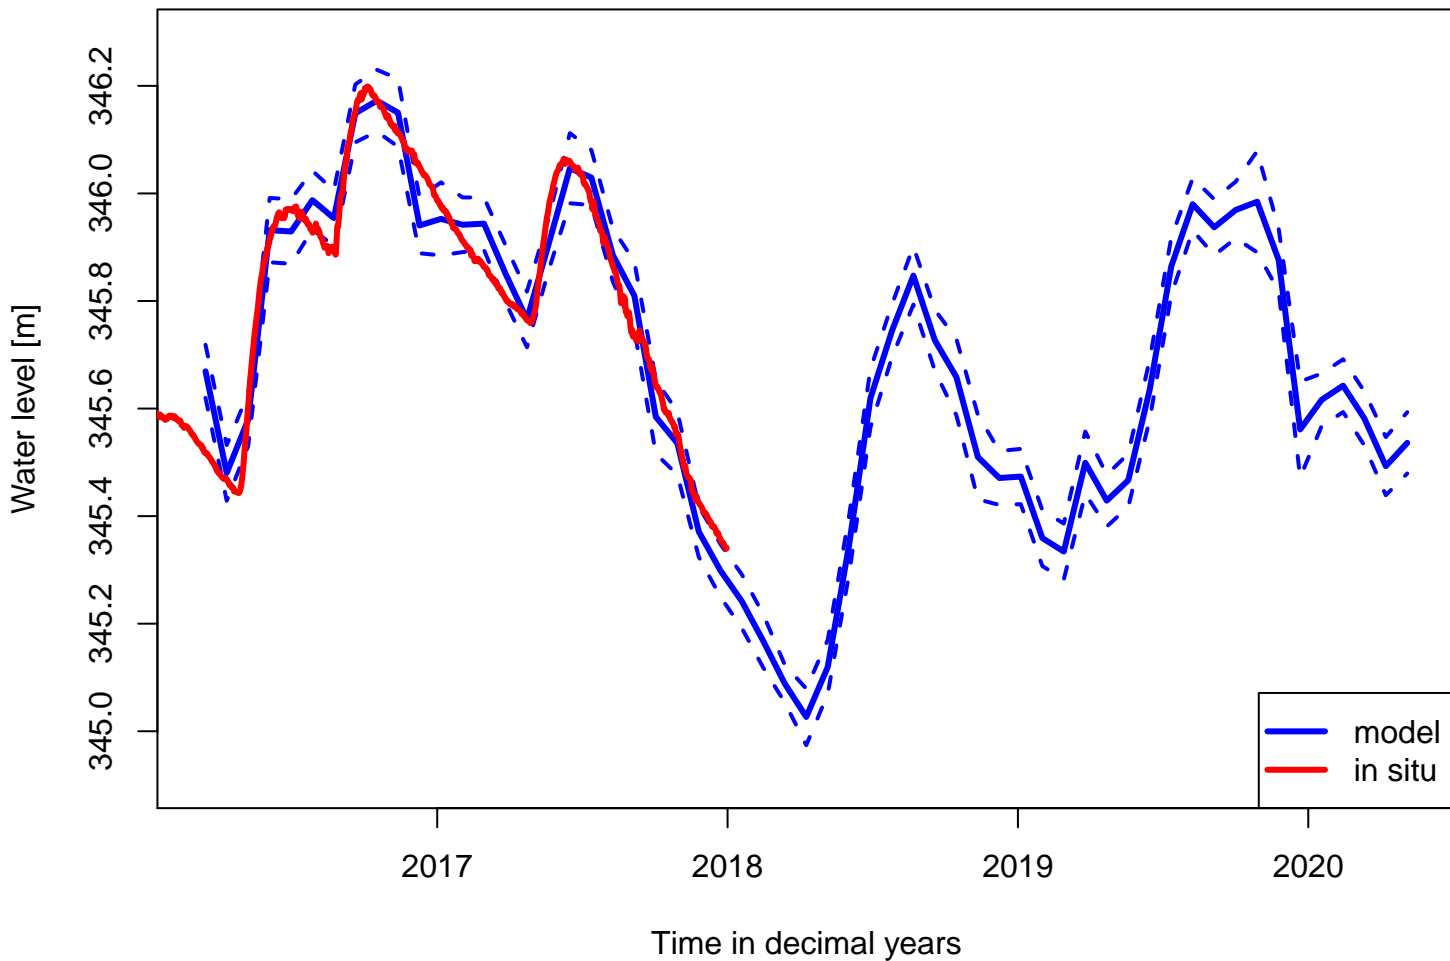

Supplement: s1 [file s1]

**lakename: Nechako Reservoir lakeid: 591 lat: 53.65 lon: -127.5**

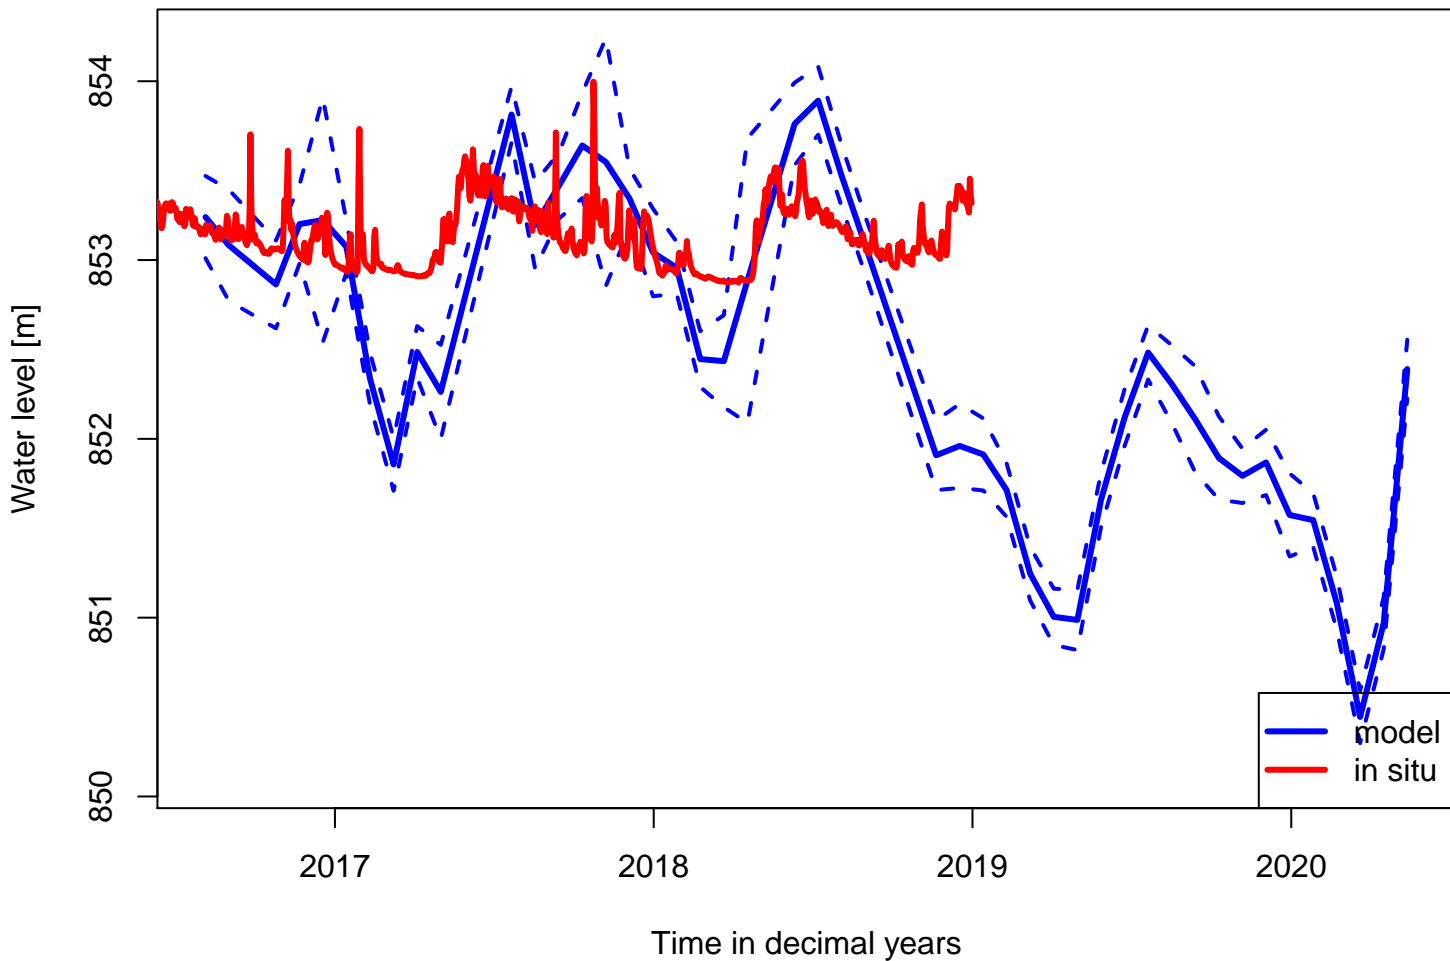

Supplement: s1 [file s1]

**lakename: lakeid: 7173 lat: 52.53 lon: -93.05**

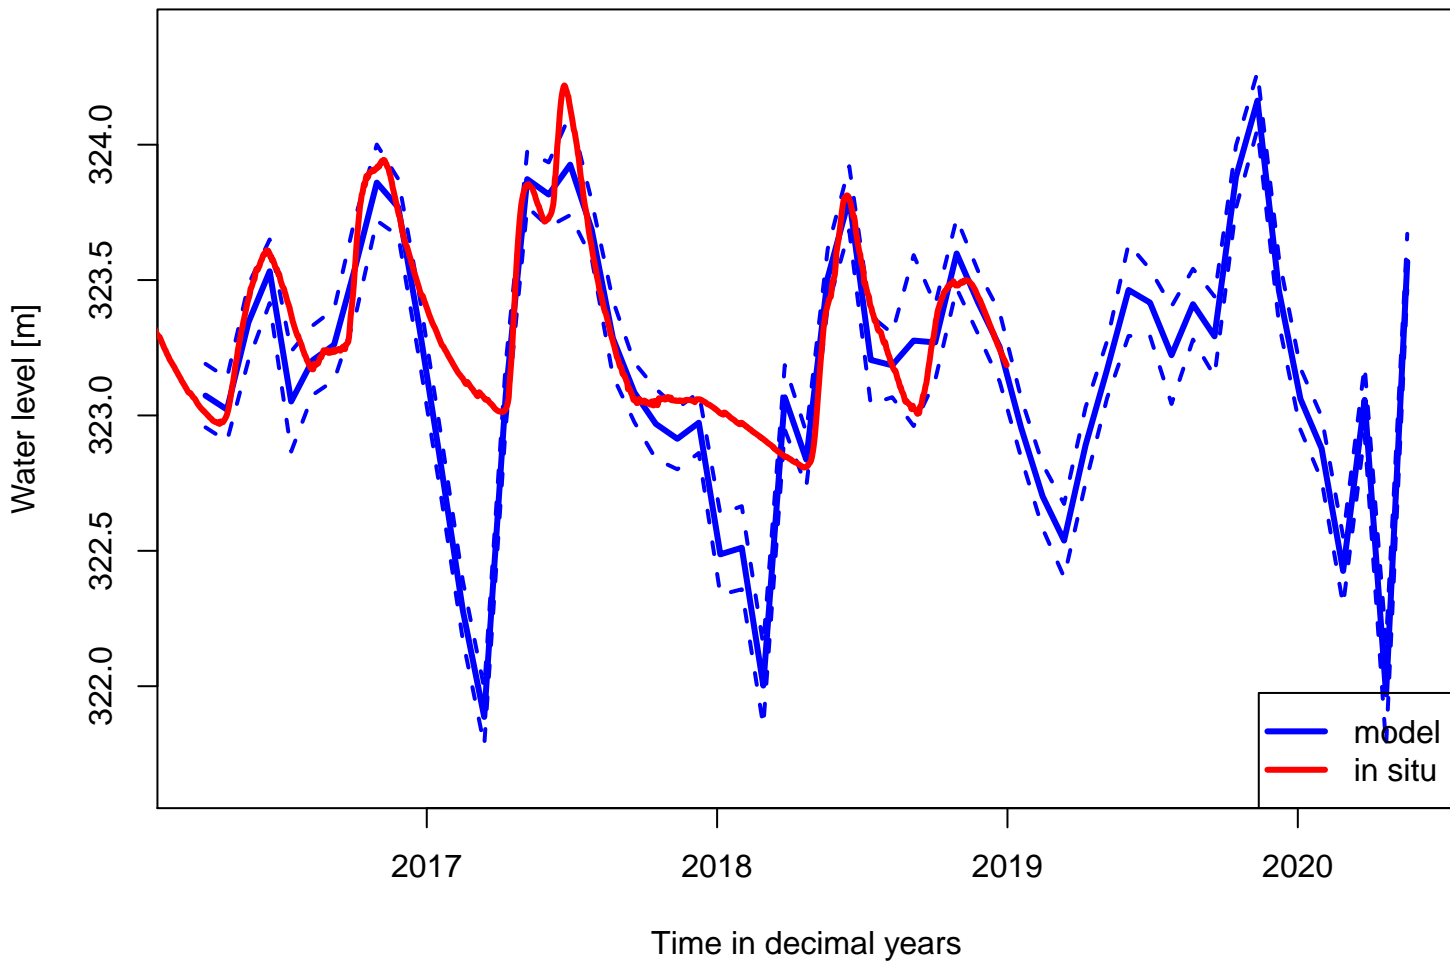

Supplement: s1 [file s1]

**lakename: lakeid: 377 lat: 60.94 lon: -117.4**

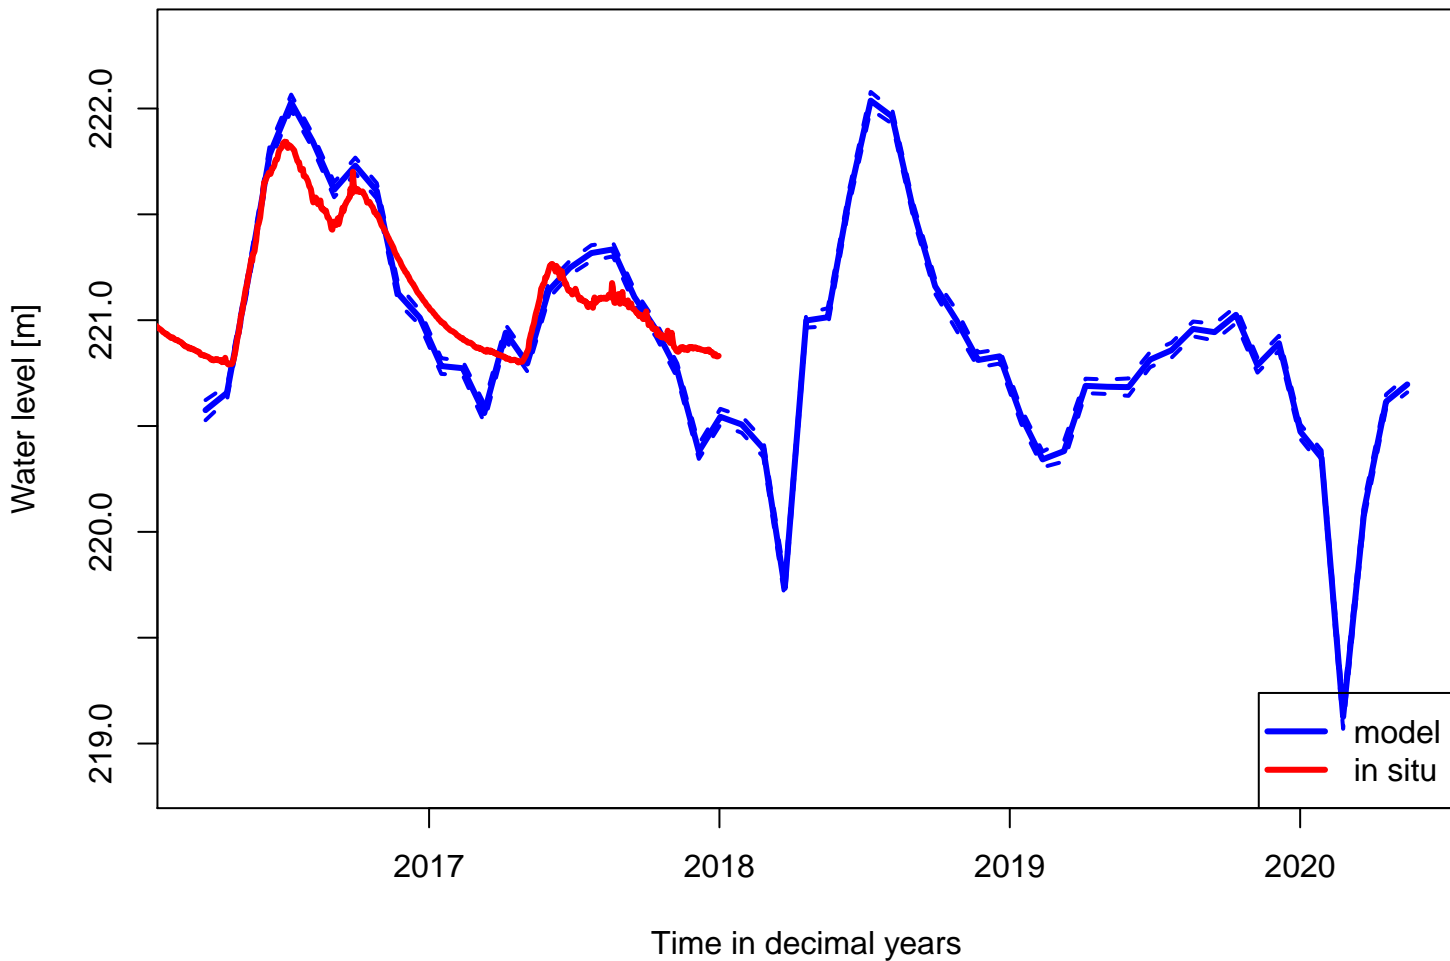

Supplement: s1 [file s1]

**lakename: Toledo Bend Reservoir lakeid: 838 lat: 31.2 lon: -93.57**

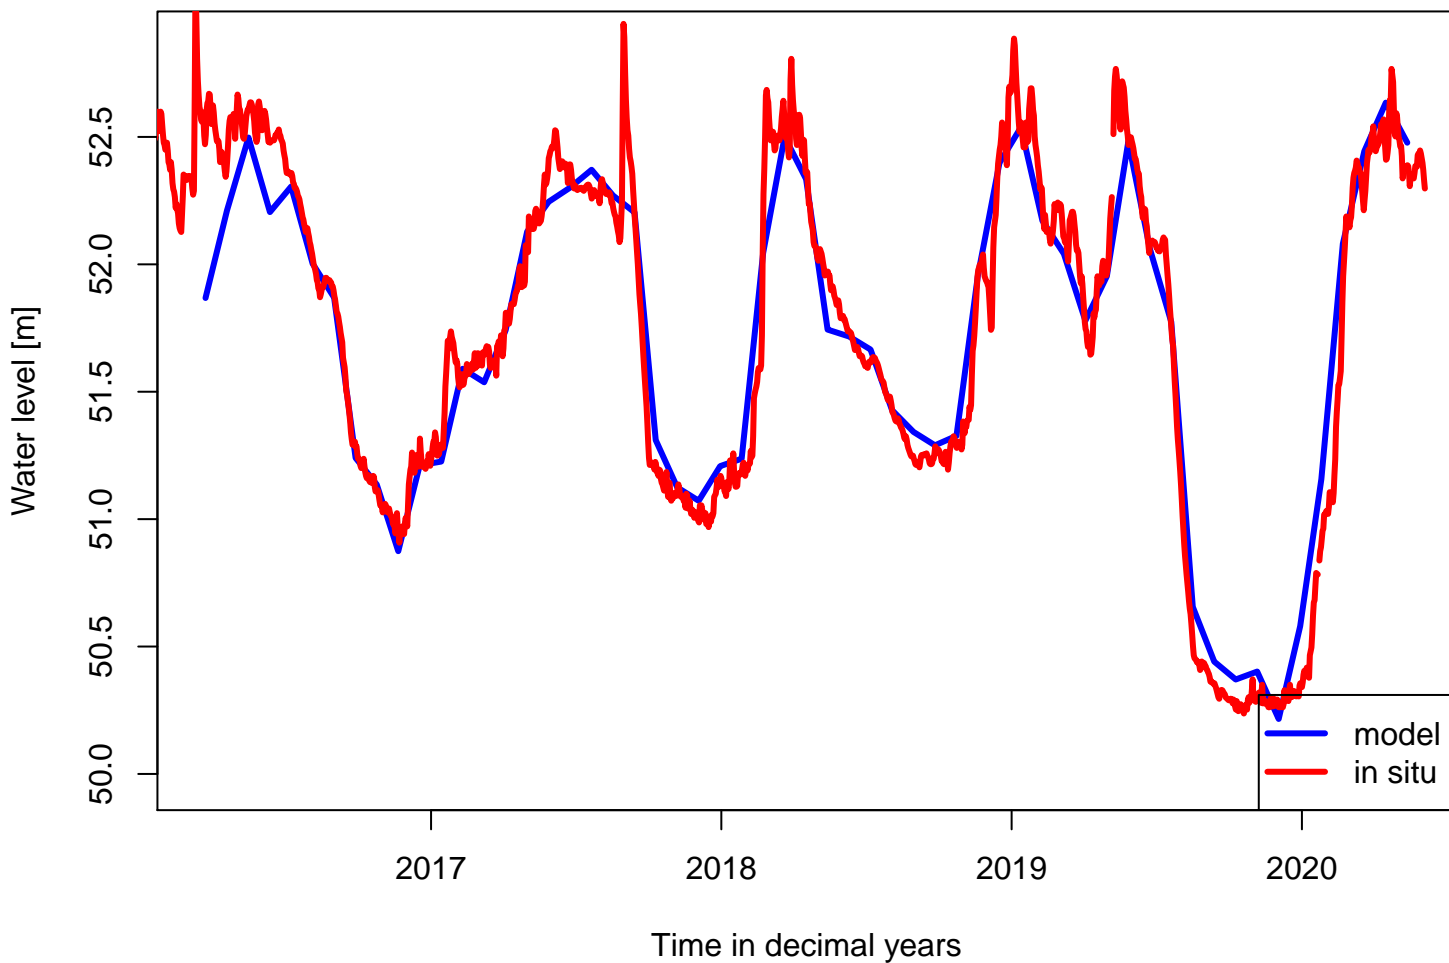

Supplement: s1 [file s1]

**lakename: Contwoyto lakeid: 22 lat: 65.78 lon: -111.2**

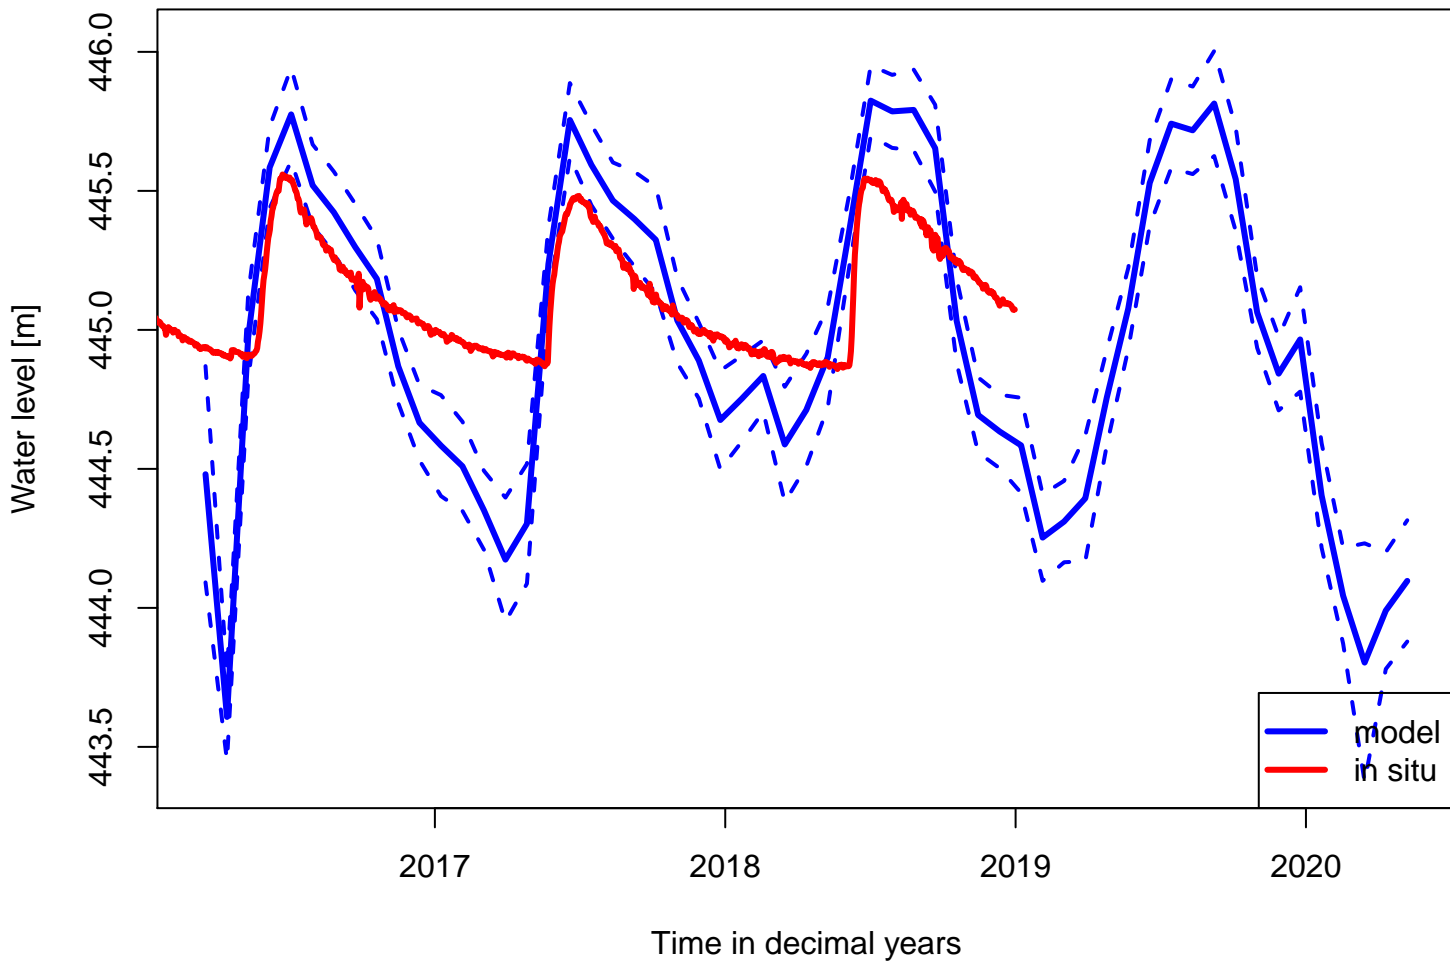

Supplement: s1 [file s1]

**lakename: lakeid: 579 lat: 54.01 lon: -125**

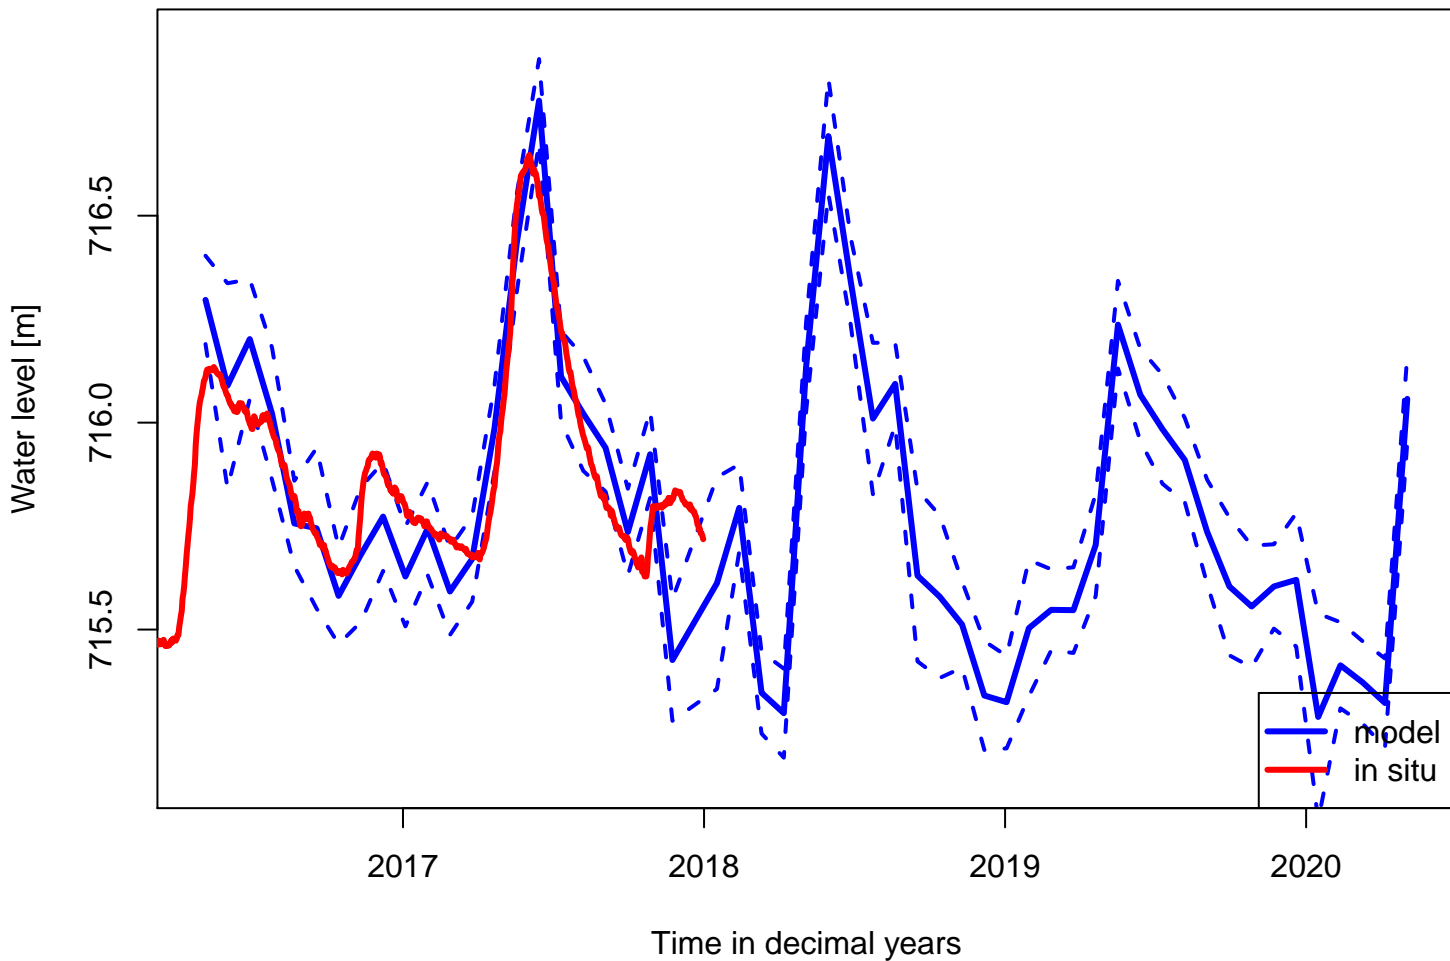

Supplement: s1 [file s1]

**lakename: Texarkana Lake lakeid: 9434 lat: 33.3 lon: -94.16**

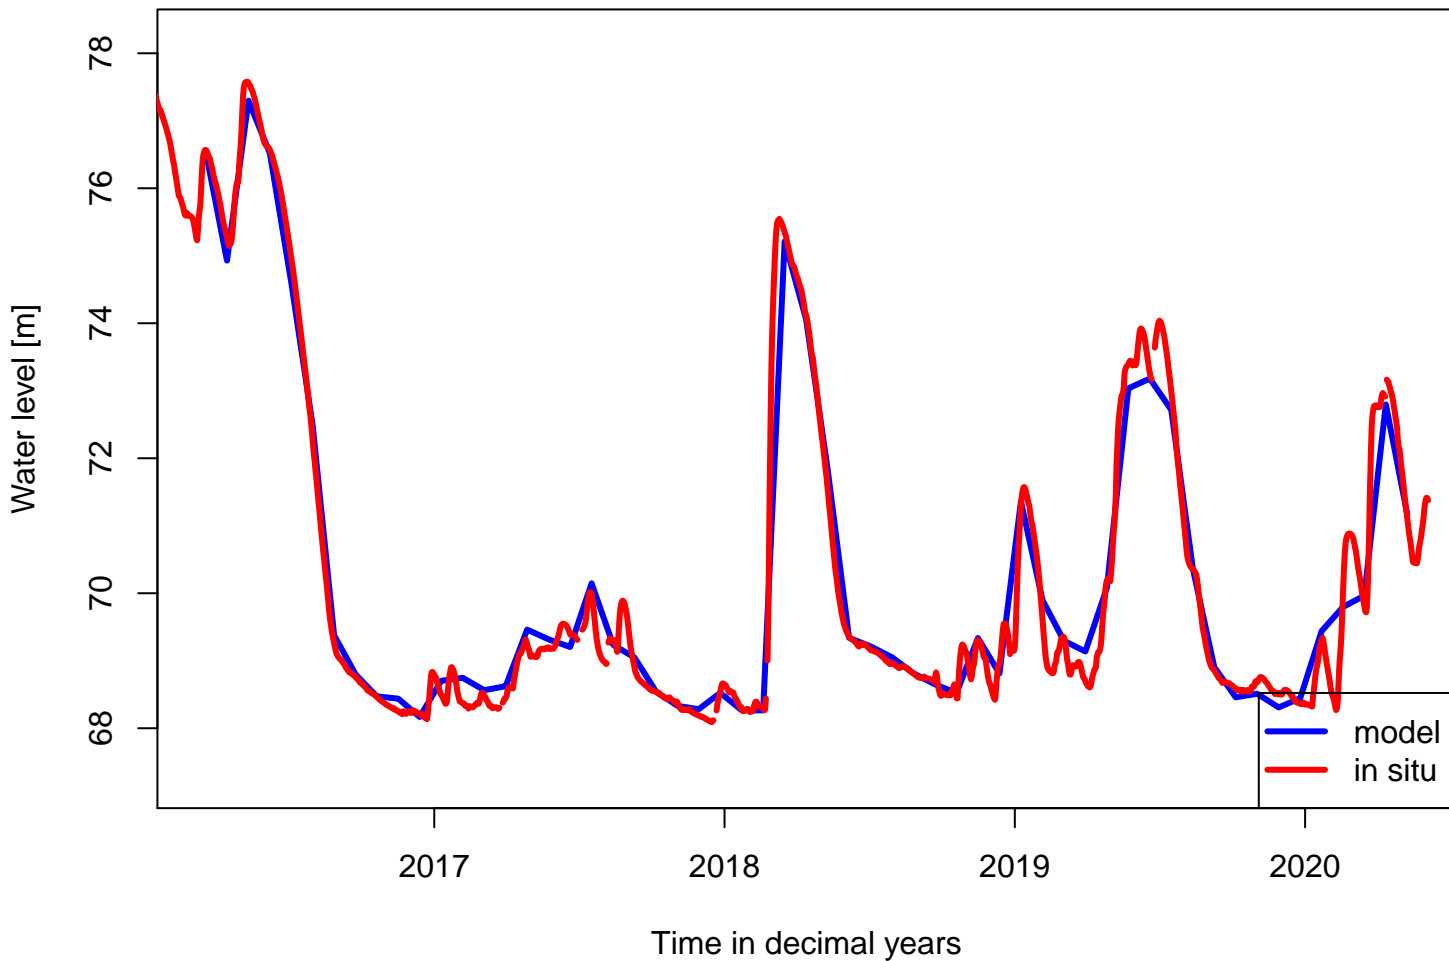

Supplement: s1 [file s1]

**lakename: lakeid: 713 lat: 48.5 lon: -92.66**

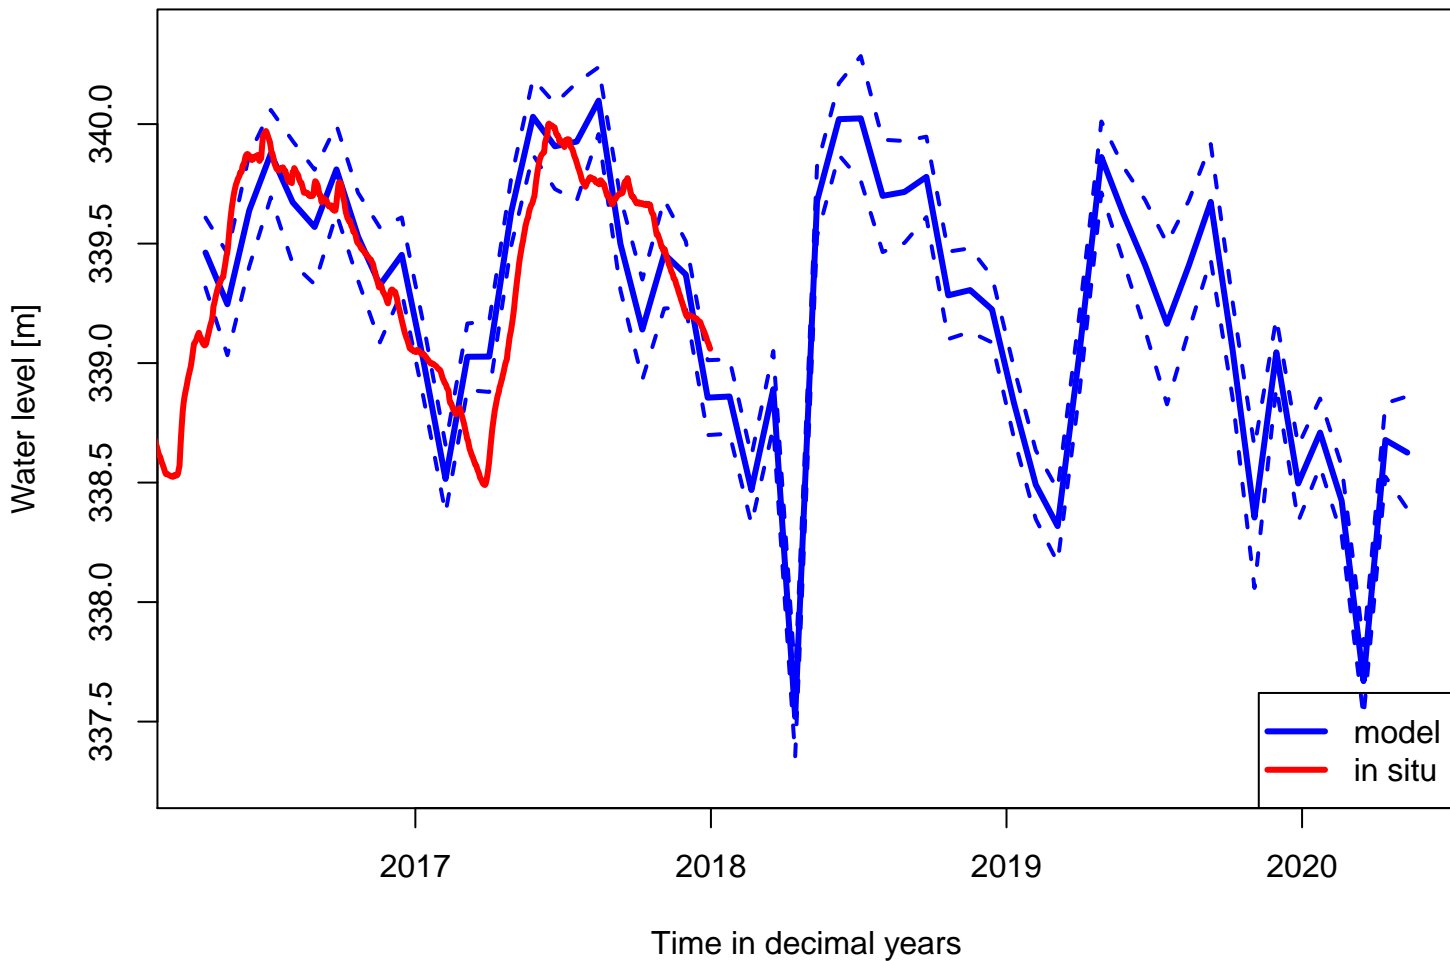

Supplement: s1 [file s1]

**lakename: Laberge lakeid: 365 lat: 61.09 lon: -135.2**

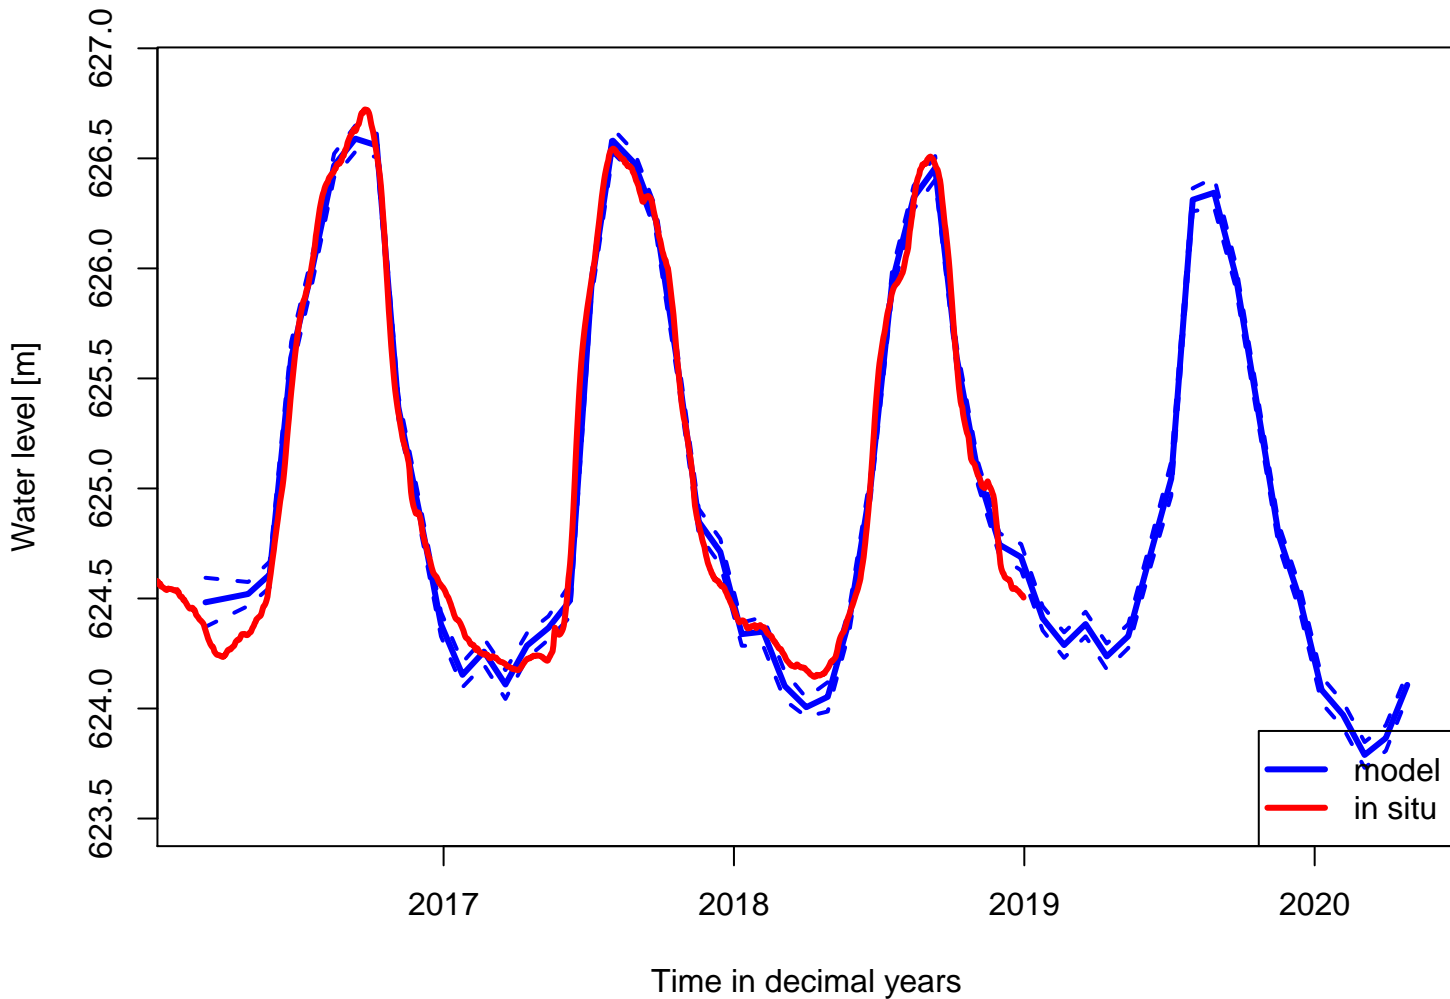

Supplement: s1 [file s1]

**lakename: Teslin lakeid: 394 lat: 60.16 lon: -132.7**

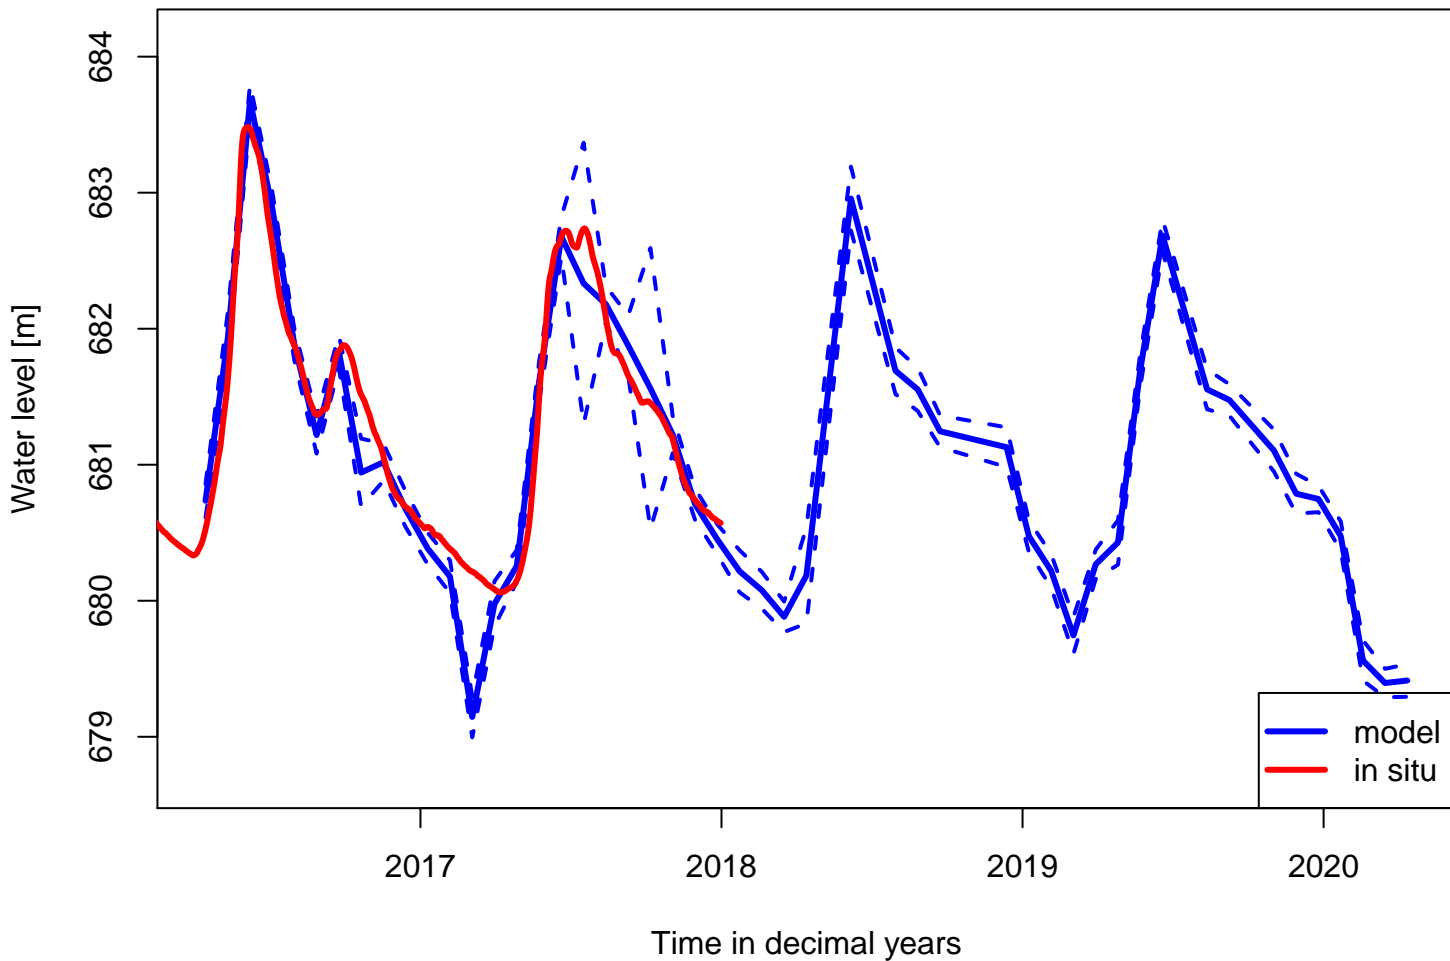

Supplement: s1 [file s1]

**lakename: Woods lakeid: 57 lat: 48.9 lon: -95.32**

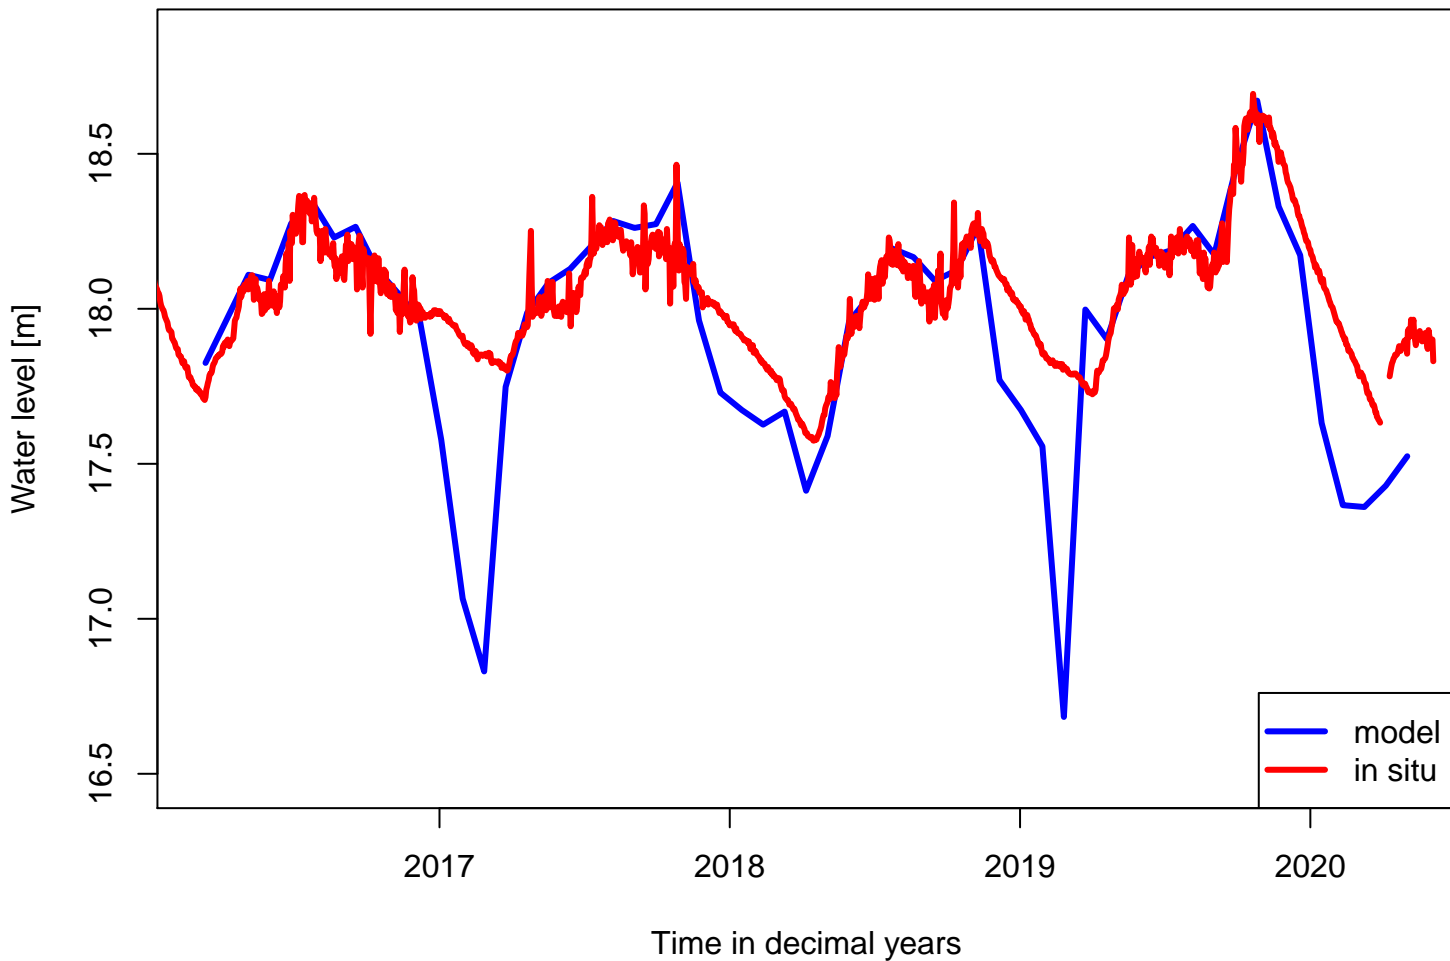

Supplement: s1 [file s1]

**lakename: Granville lakeid: 471 lat: 56.23 lon: -100.6**

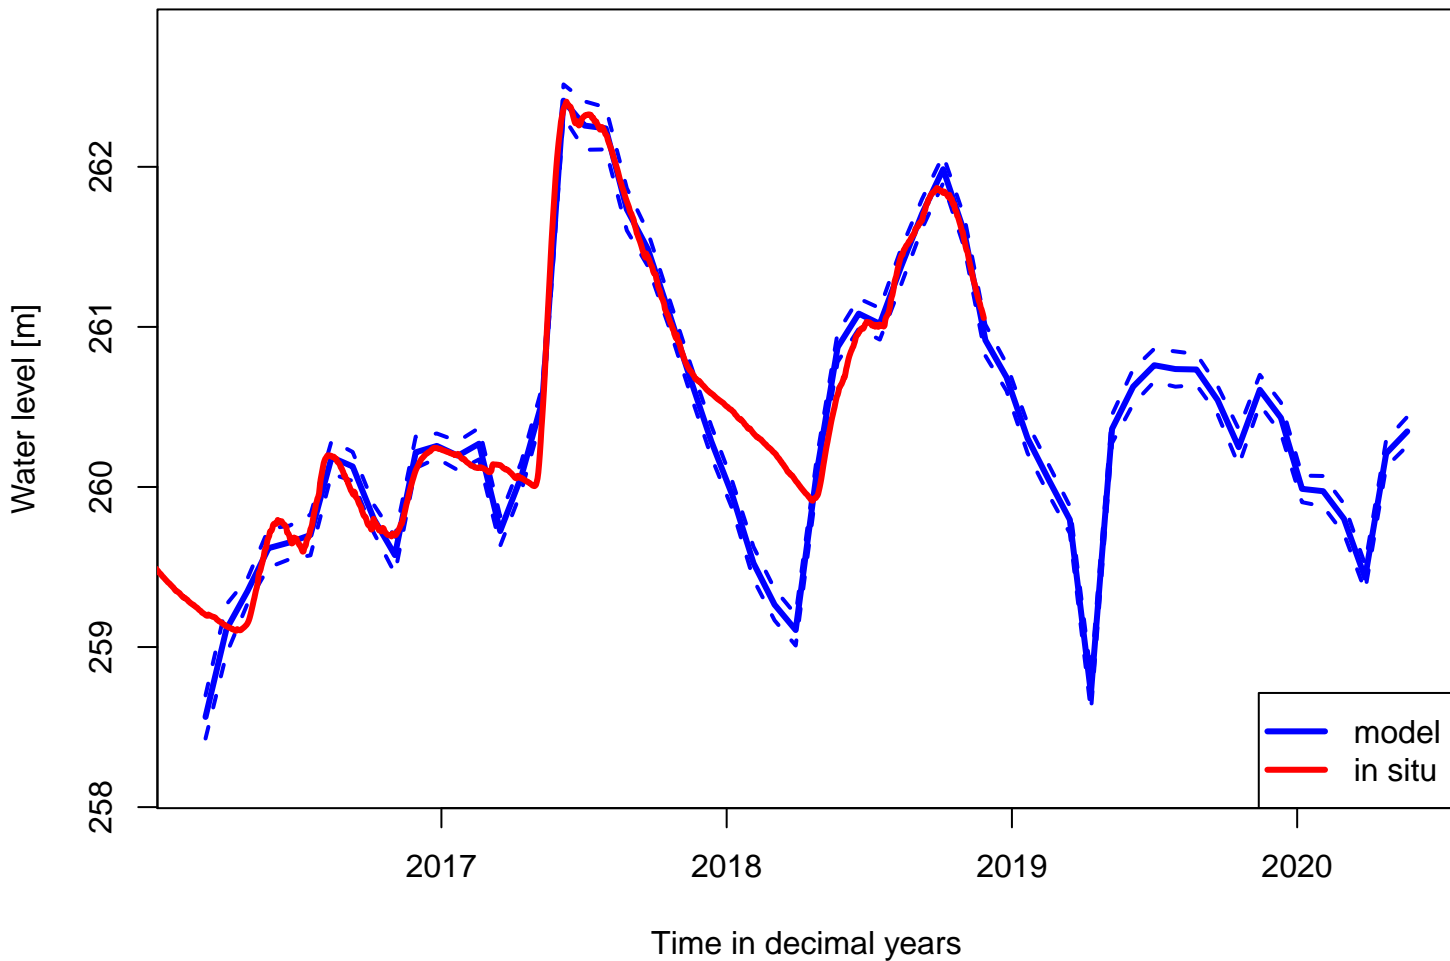

Supplement: s1 [file s1]

**lakename: lakeid: 5886 lat: 56.01 lon: -103.3**

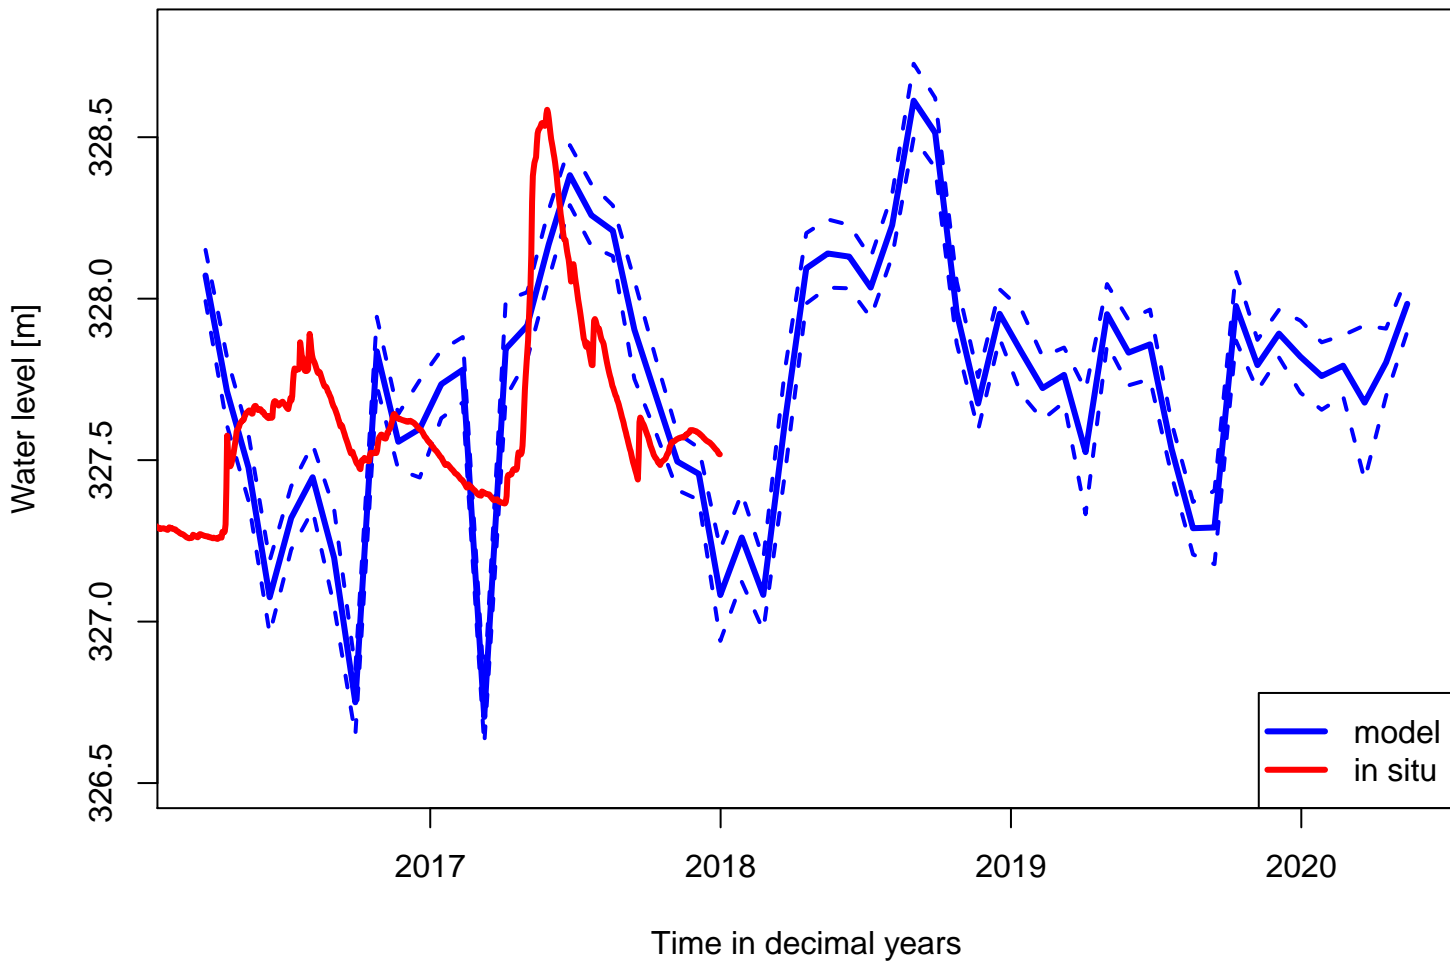

Supplement: s1 [file s1]

**lakename: lakeid: 579 lat: 54.01 lon: -125**

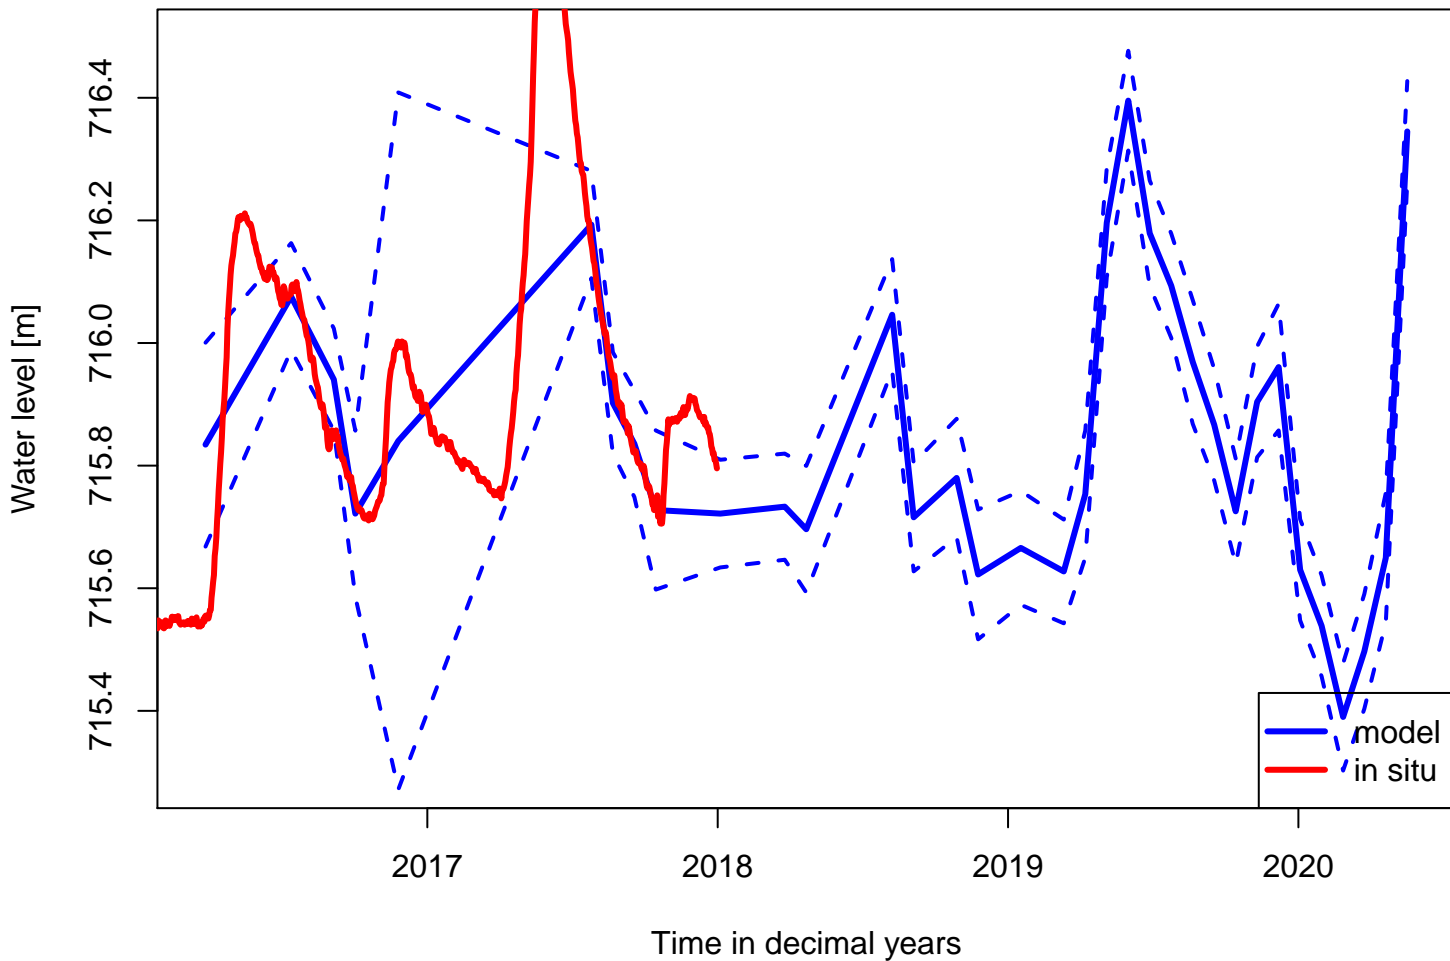

Supplement: s1 [file s1]

**lakename: lakeid: 9427 lat: 33.55 lon: -80.5**

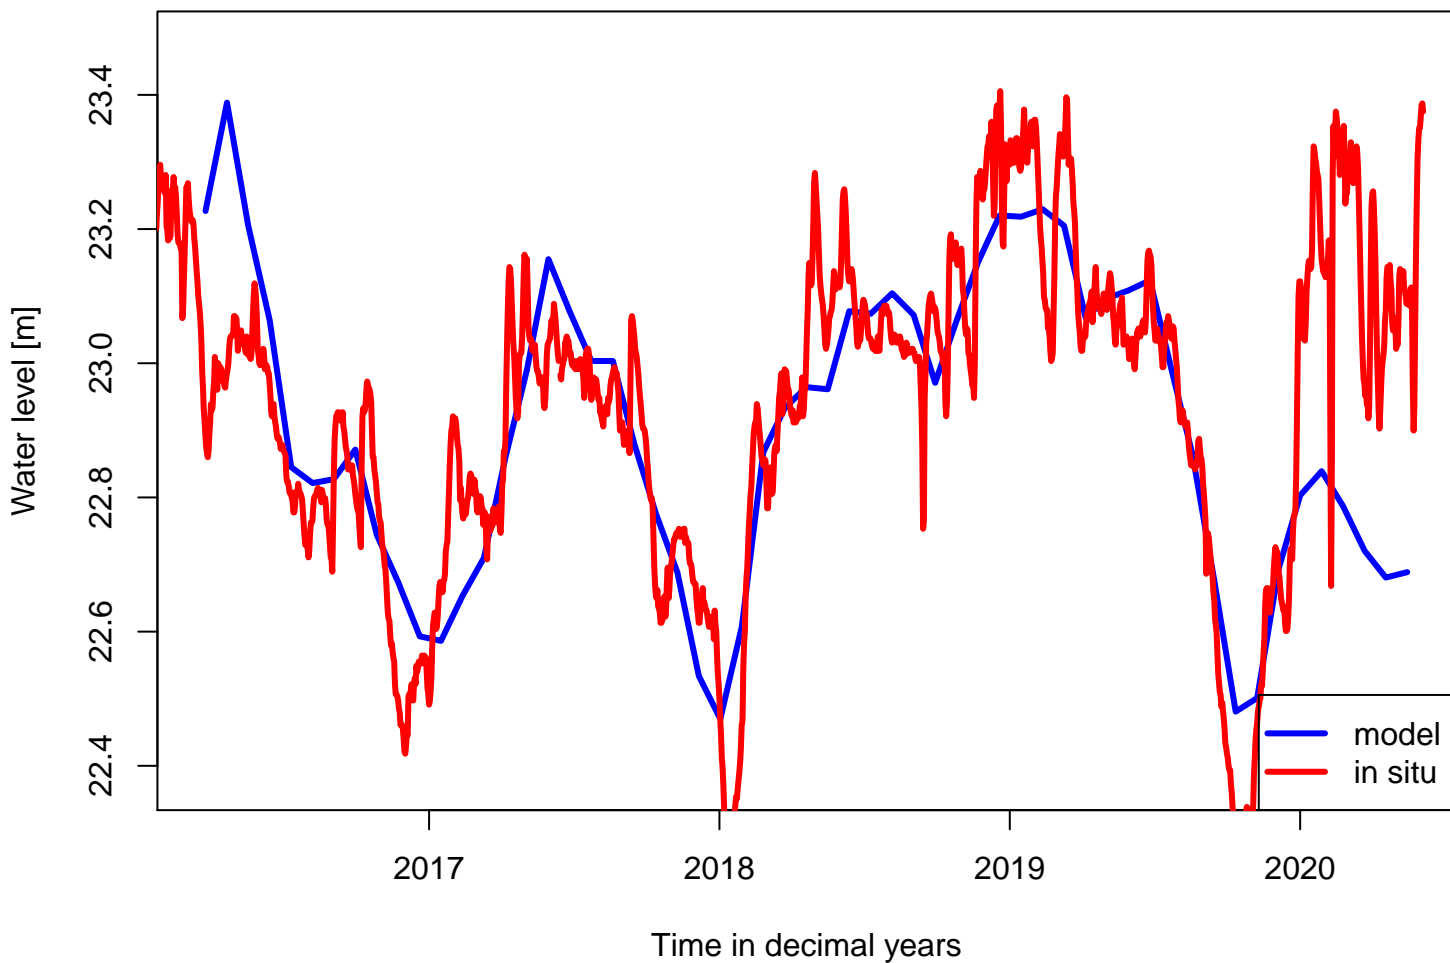

Supplement: s1 [file s1]

**lakename: Pigeon lakeid: 7014 lat: 53.02 lon: -114.1**

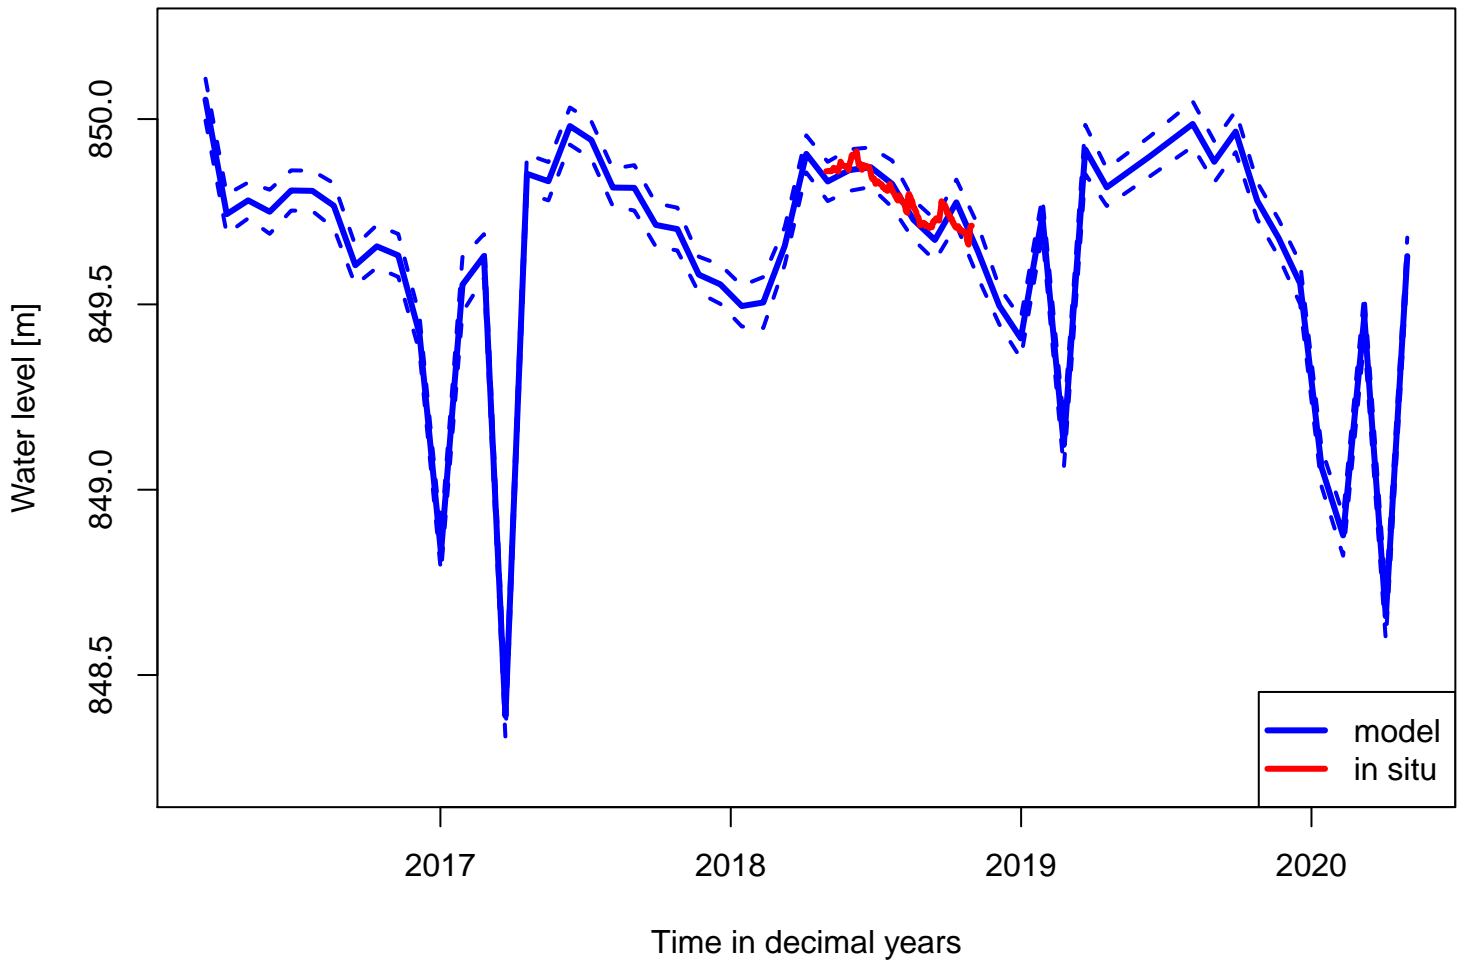

Supplement: s1 [file s1]

**lakename: lakeid: 8244 lat: 48.82 lon: -124.1**

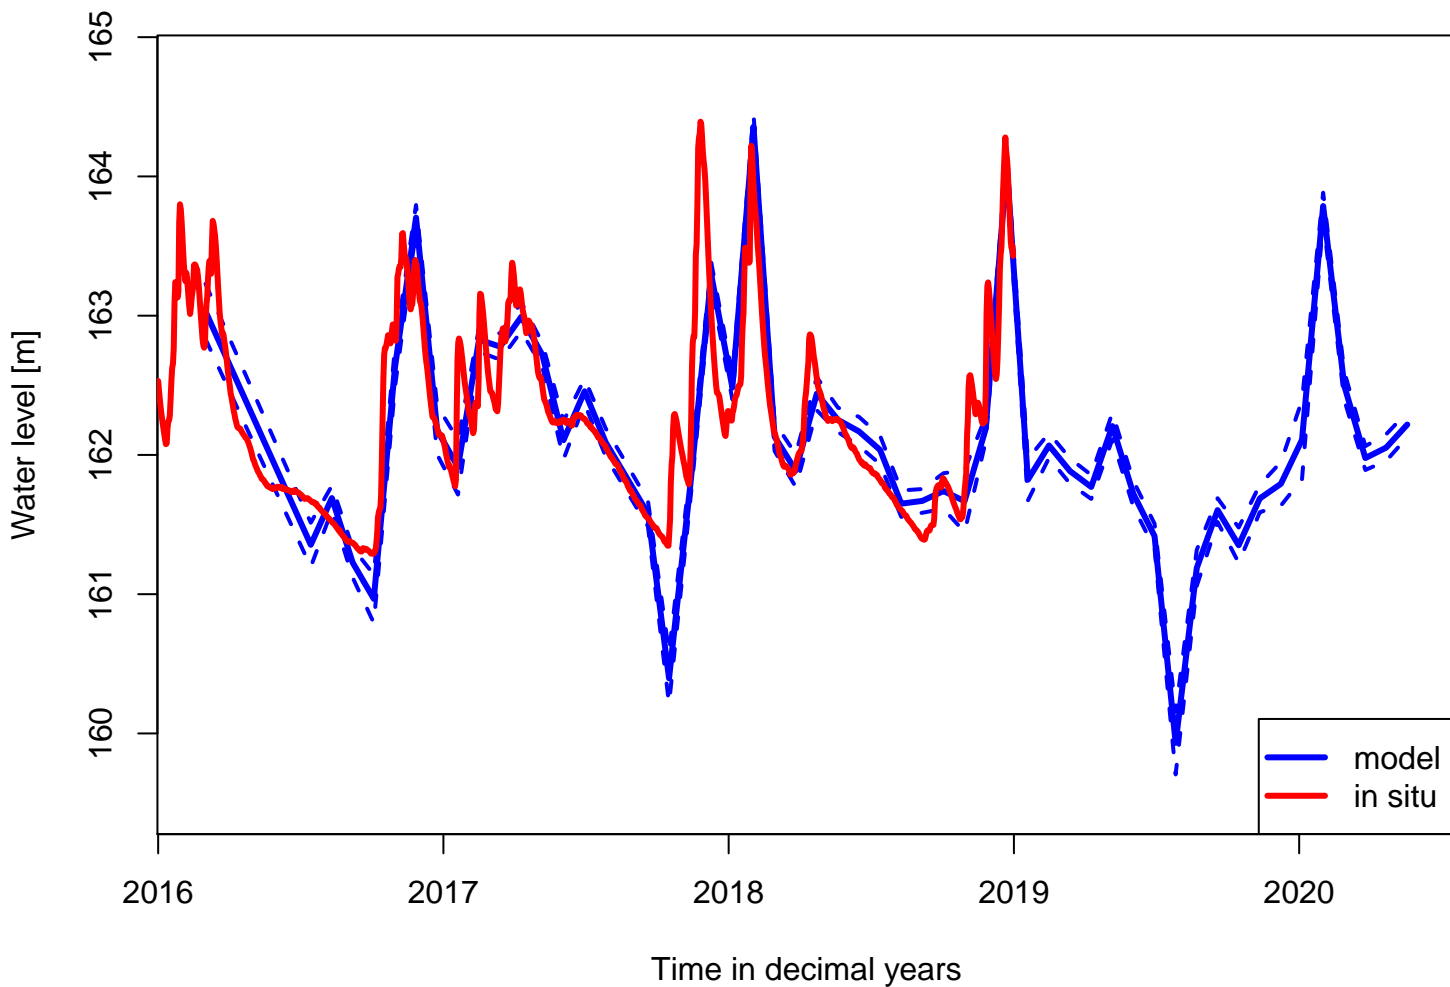

Supplement: s1 [file s1]

**lakename: La Ronge lakeid: 41 lat: 55.1 lon: -105.3**

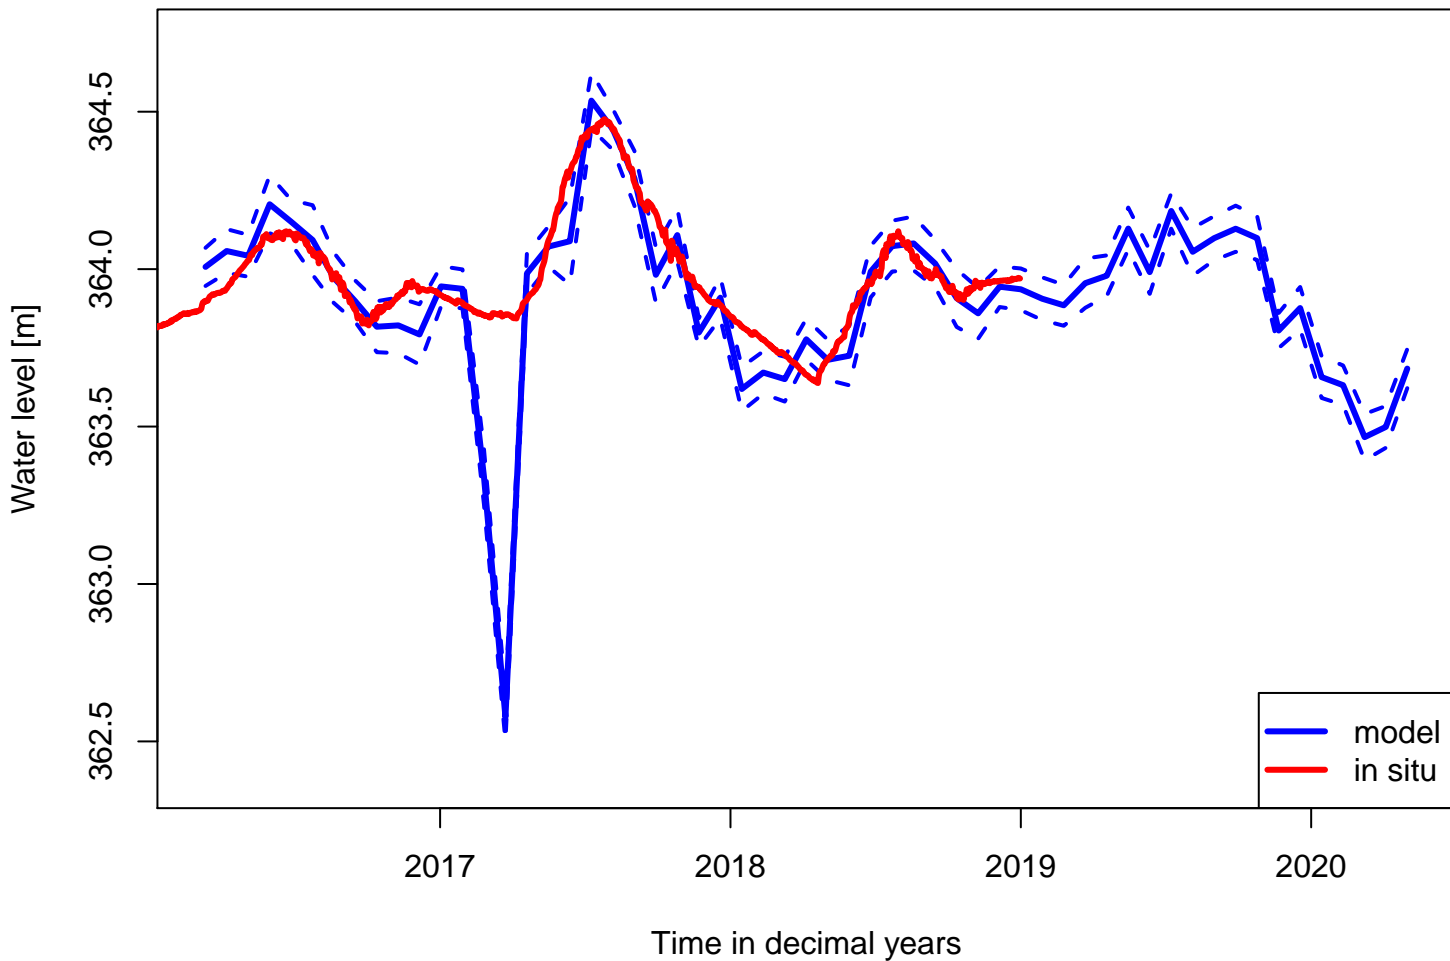

Supplement: s1 [file s1]

**lakename: Nonacho lakeid: 359 lat: 61.73 lon: -109.7**

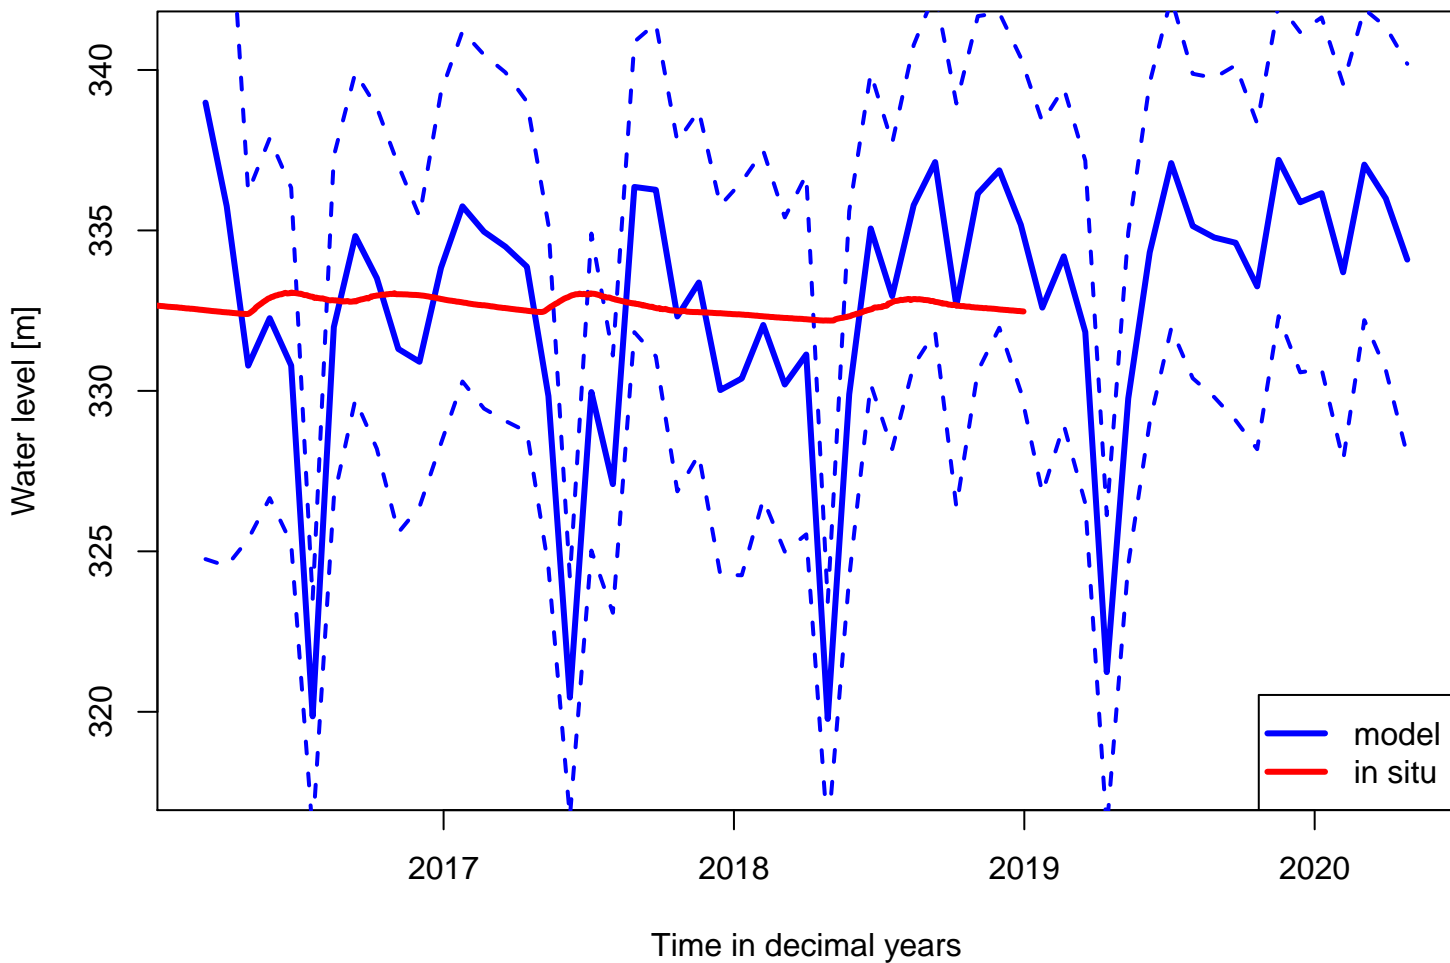

Supplement: s1 [file s1]

**lakename: Winnebago lakeid: 762 lat: 44.07 lon: -88.33**

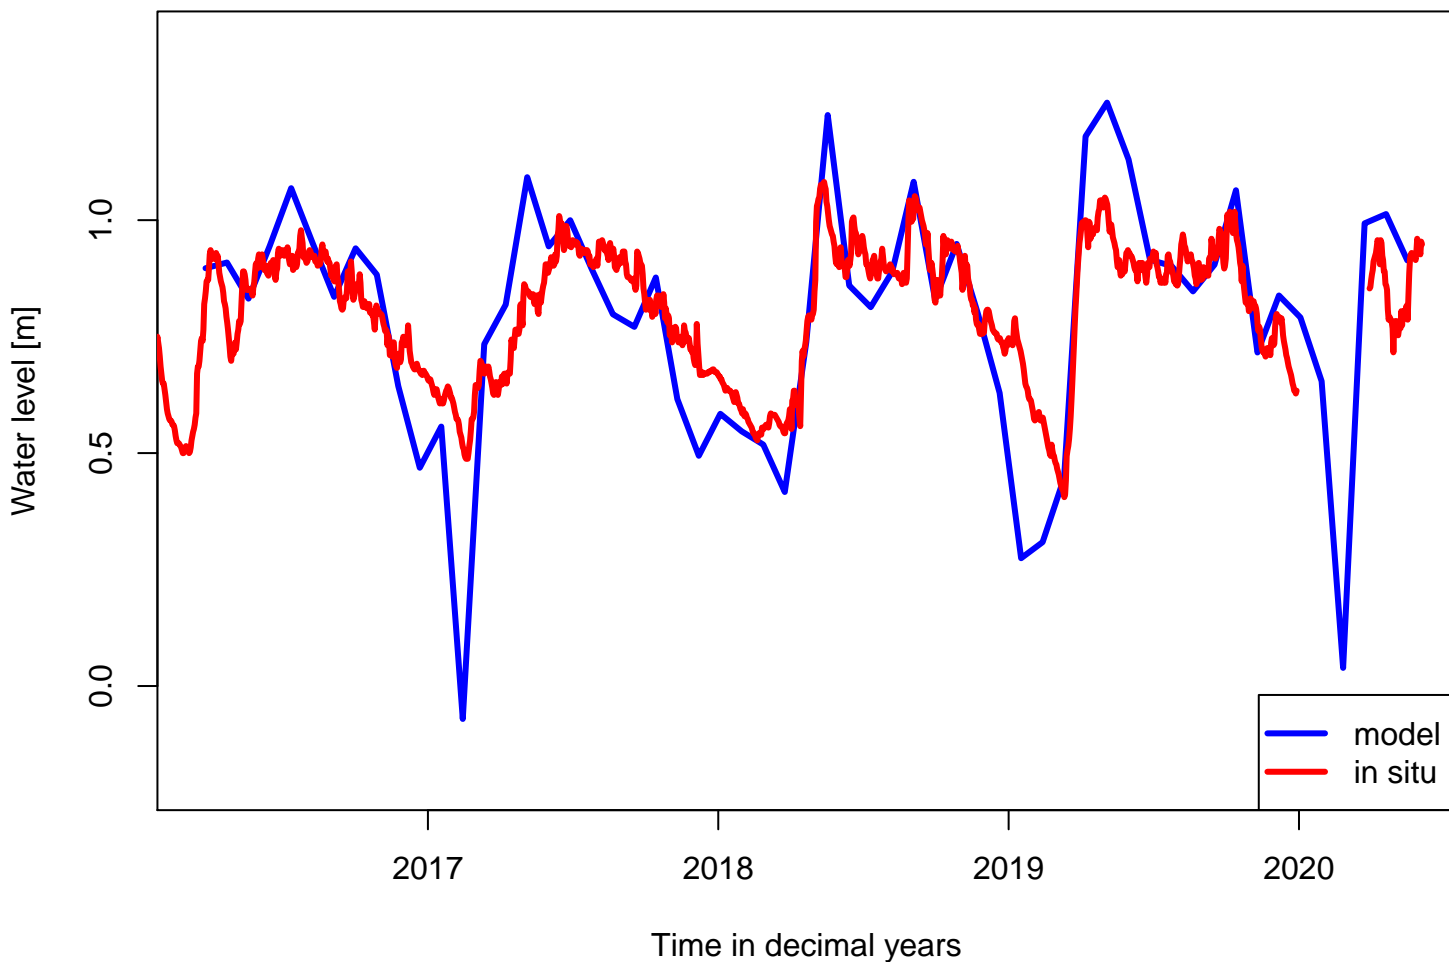

Supplement: s1 [file s1]

**lakename: Seul lakeid: 56 lat: 50.32 lon: -92.27**

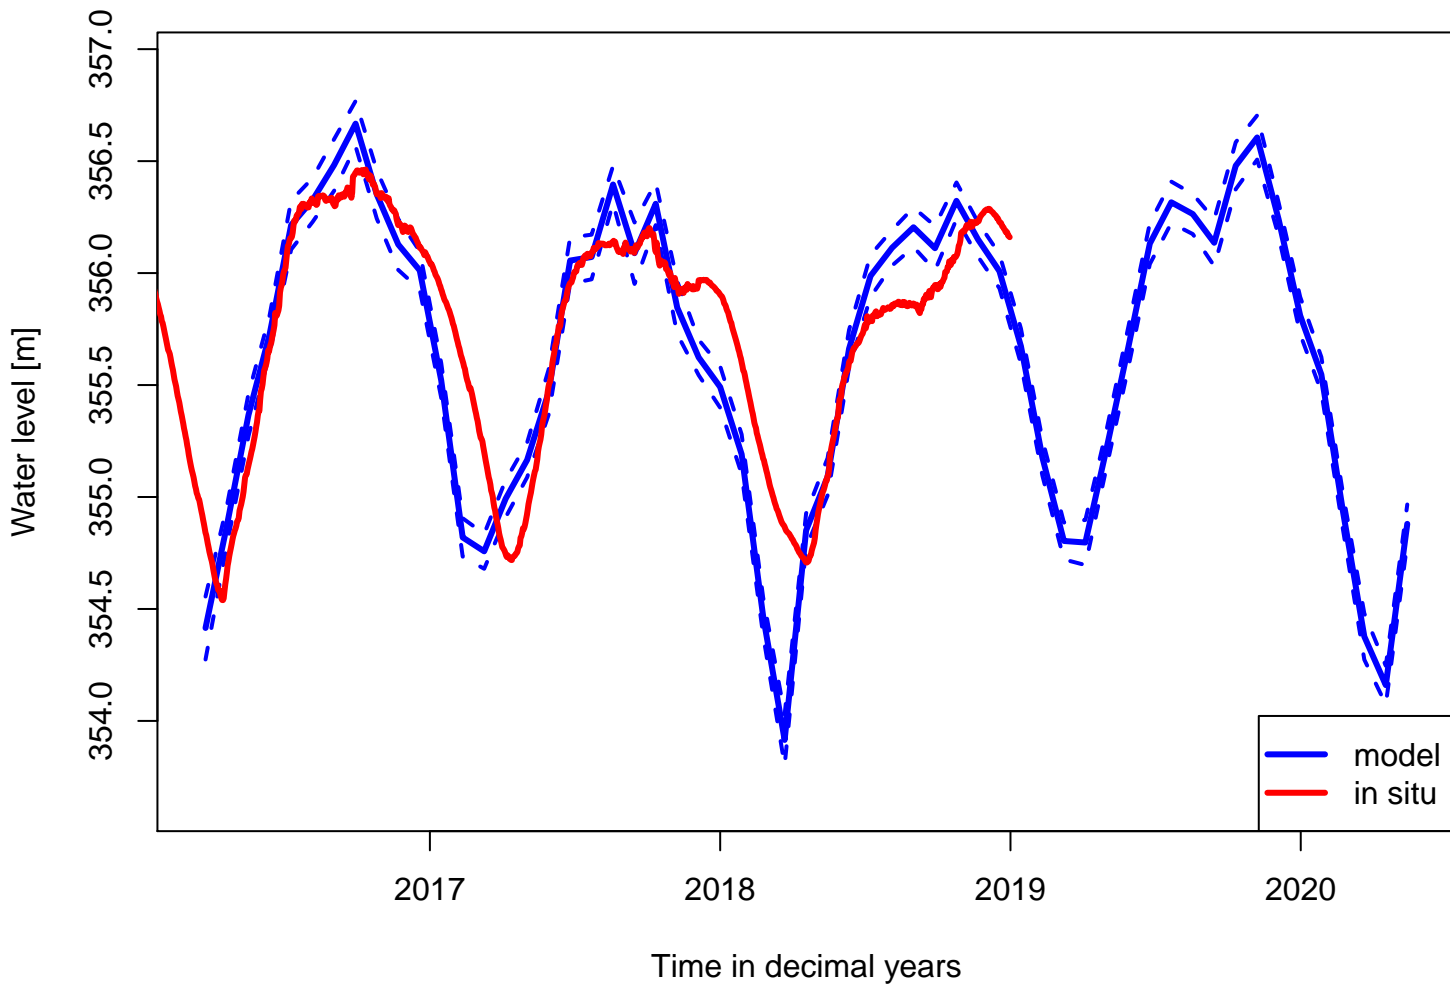

Supplement: s1 [file s1]

**lakename: Osage lakeid: 797 lat: 38.26 lon: -93.4**

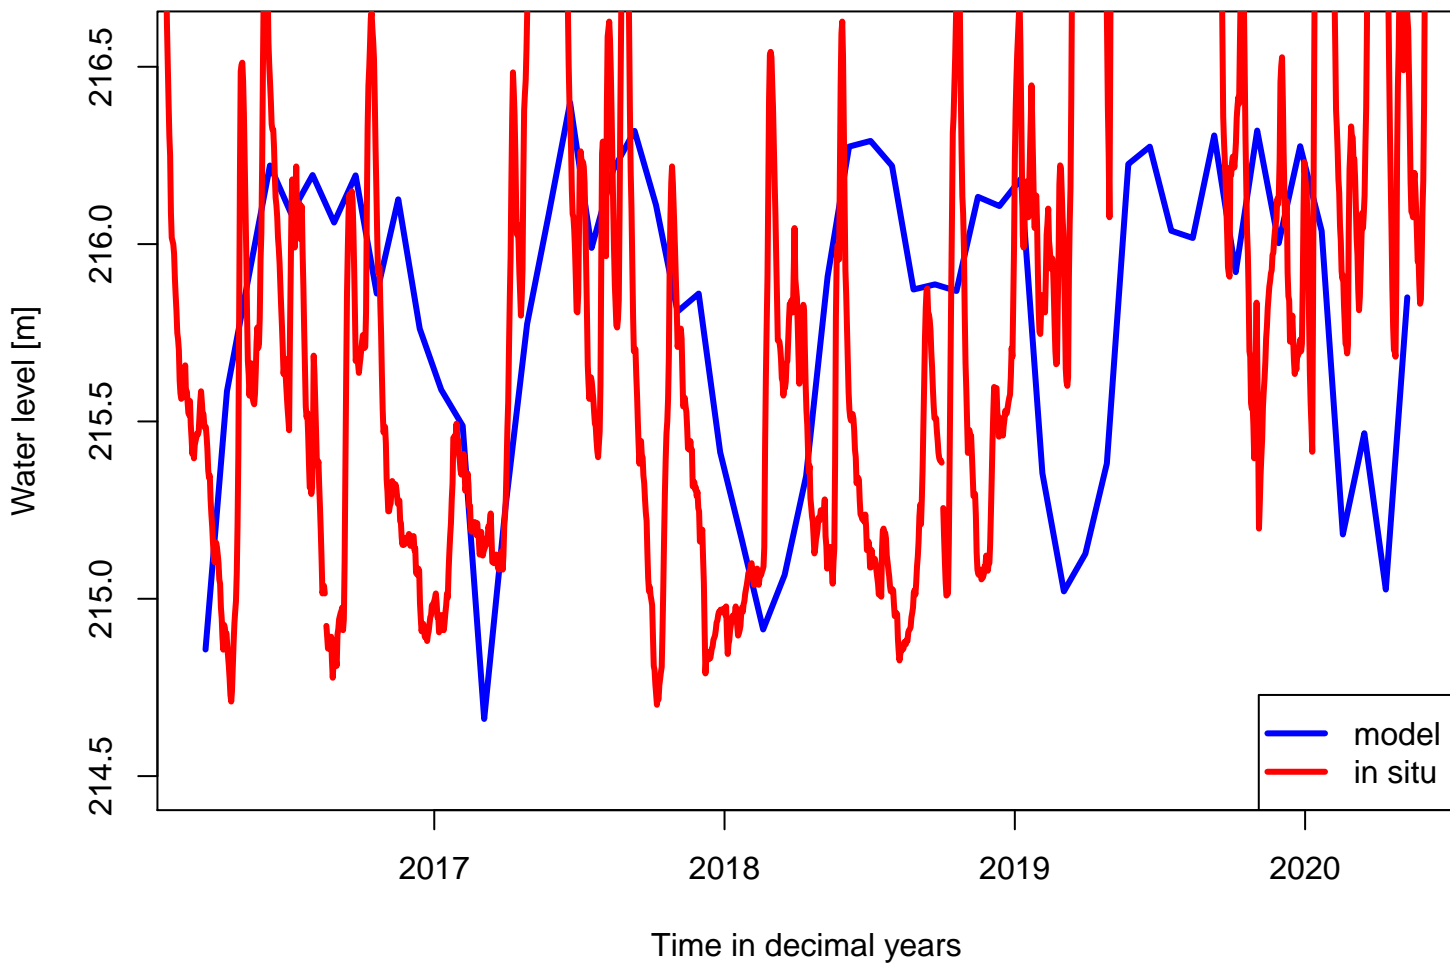

Supplement: s1 [file s1]

**lakename: lakeid: 7726 lat: 50.68 lon: -93.97**

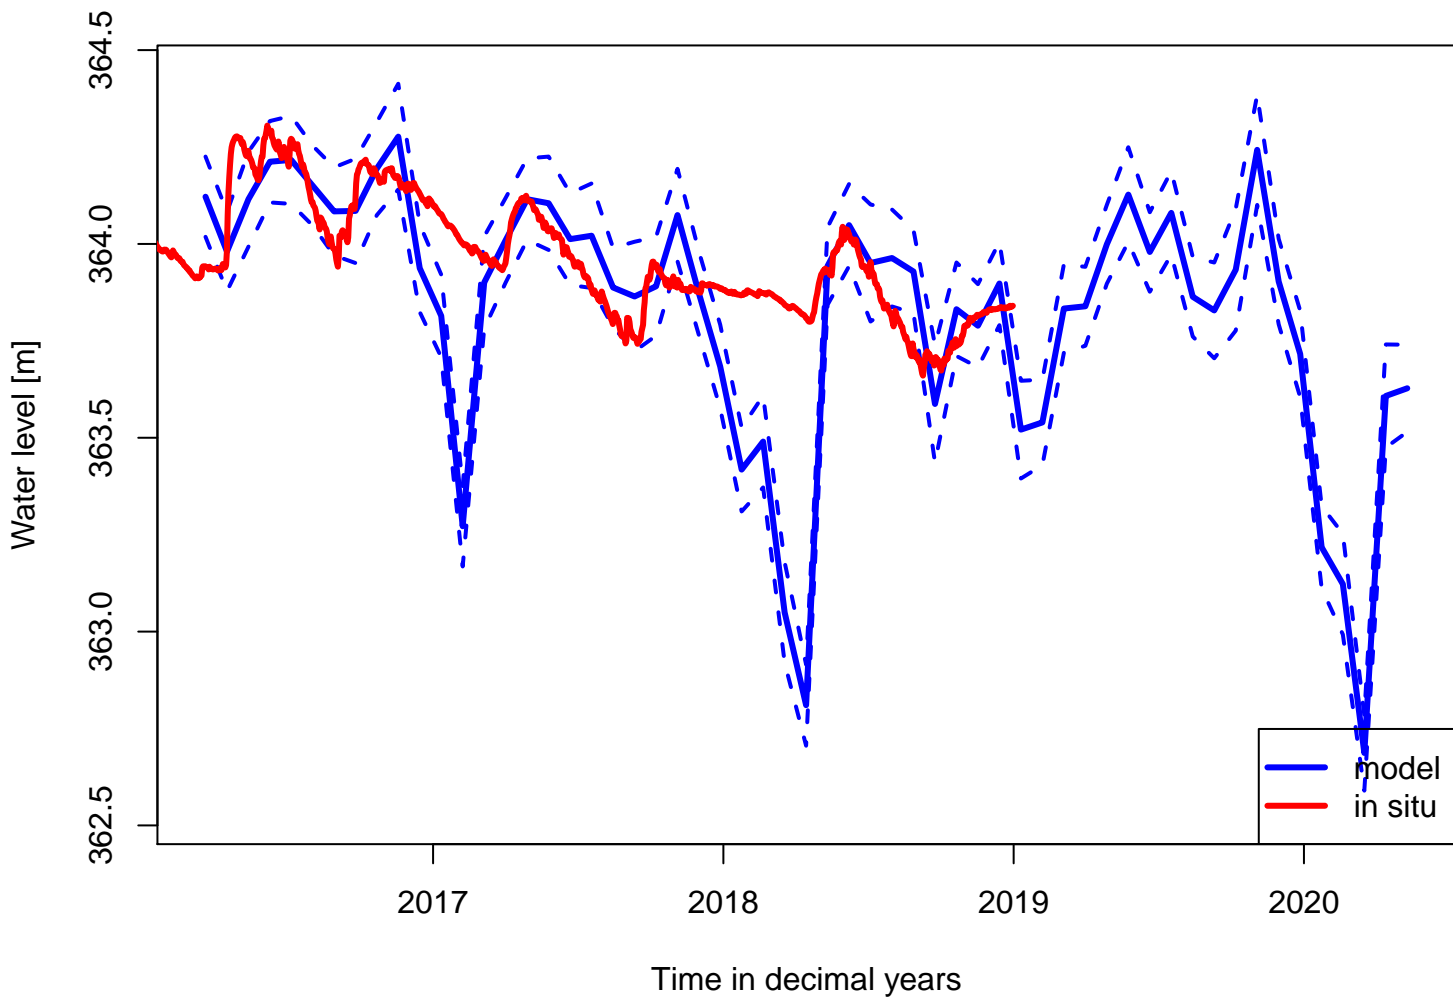

Supplement: s1 [file s1]

**lakename: lakeid: 306 lat: 63.65 lon: -95.85**

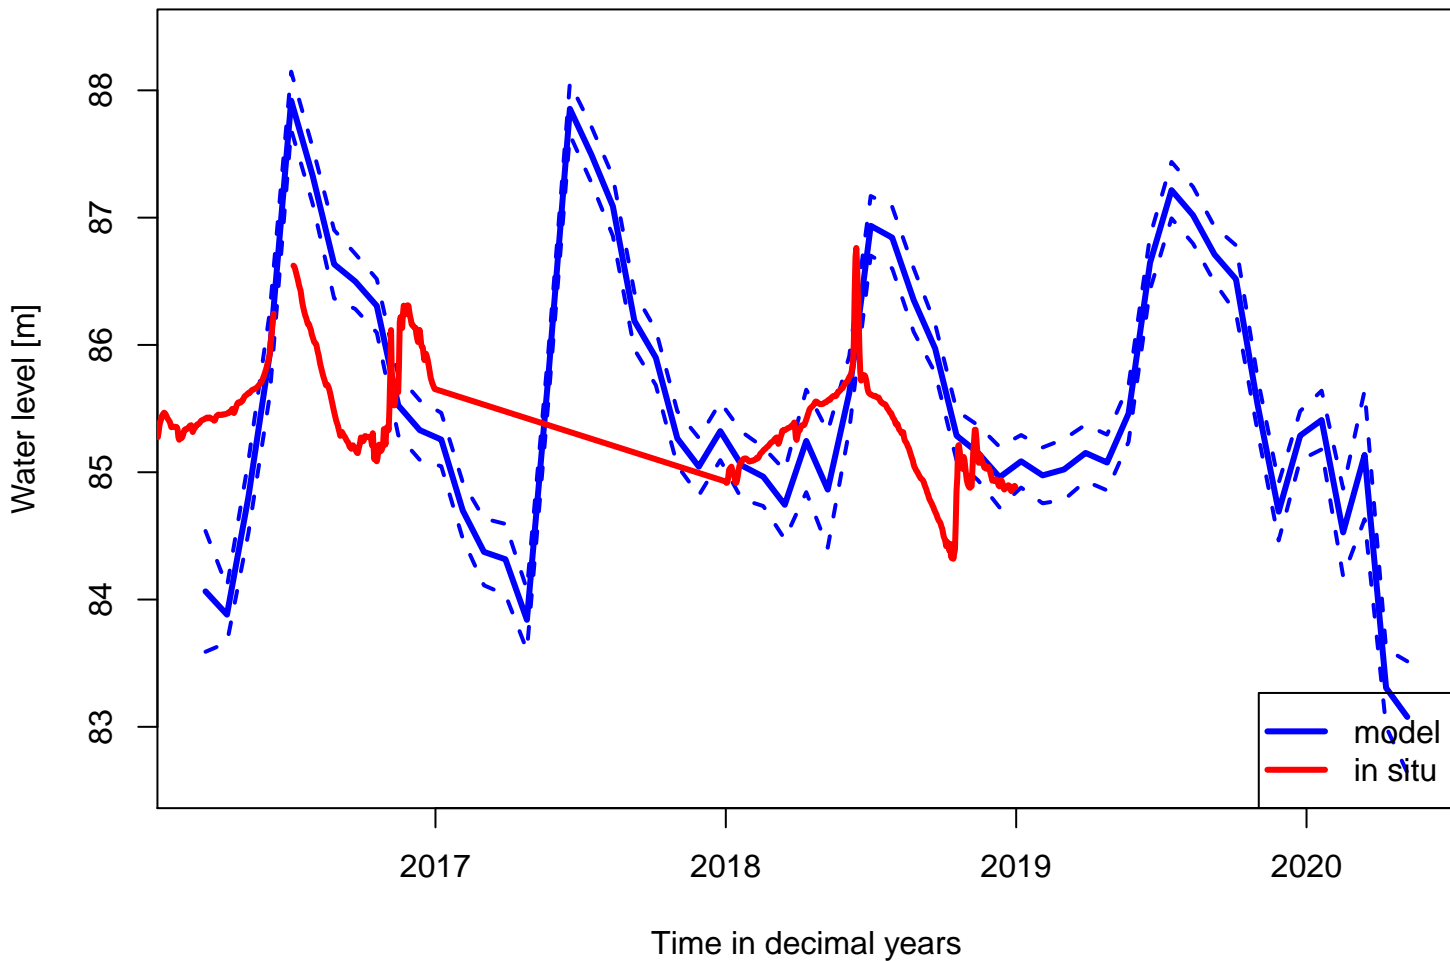

Supplement: s1 [file s1]

**lakename: Shuswap lakeid: 653 lat: 50.71 lon: -119.3**

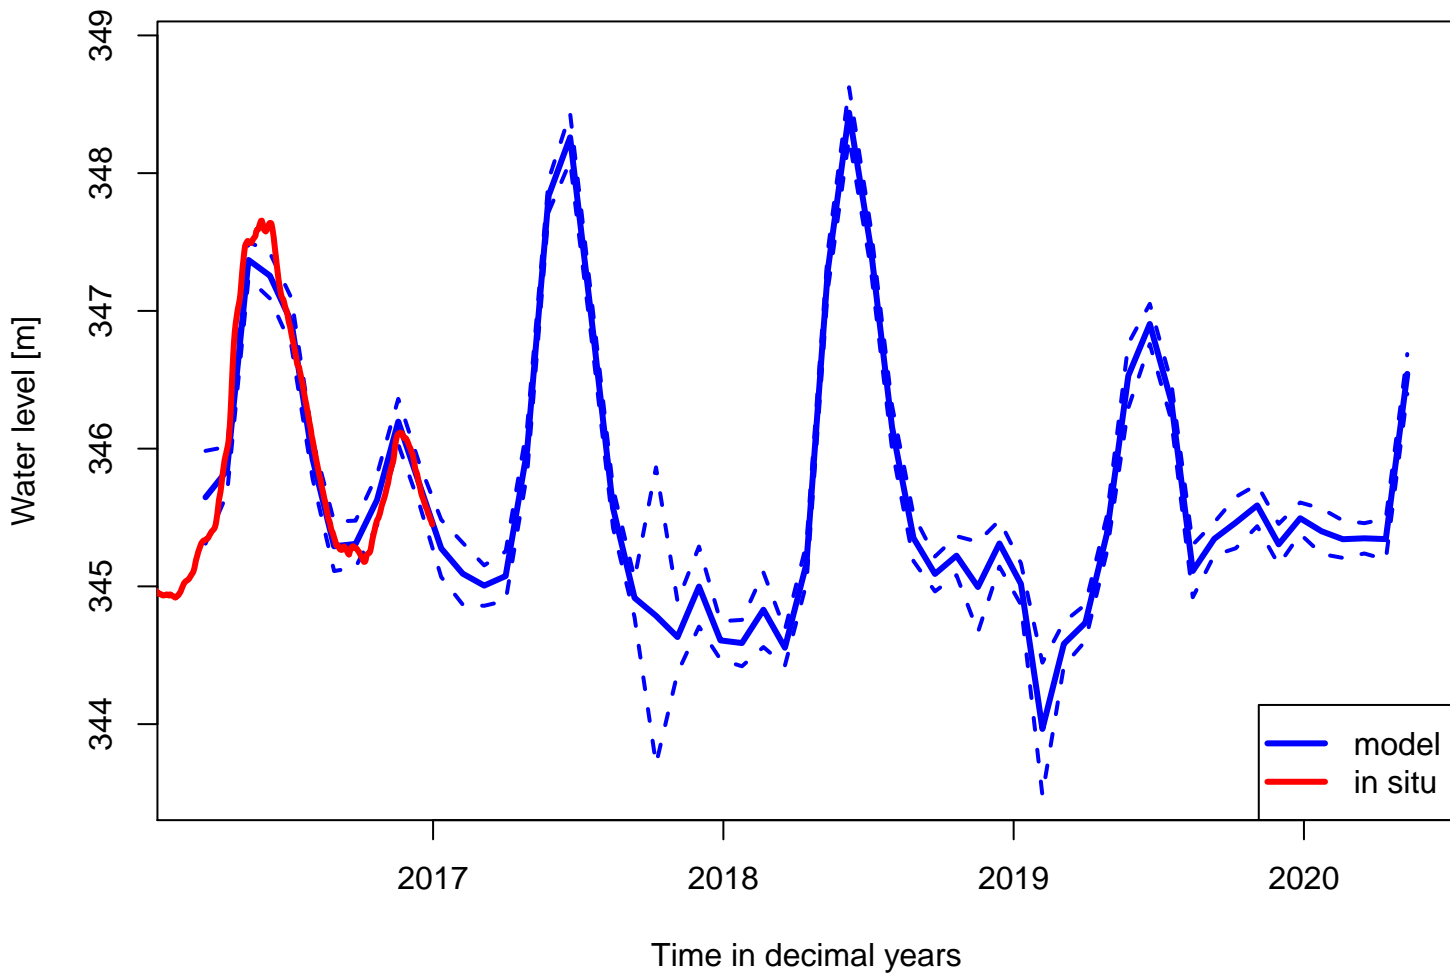

Supplement: s1 [file s1]

**lakename: Reindeer lakeid: 38 lat: 57.88 lon: -101.7**

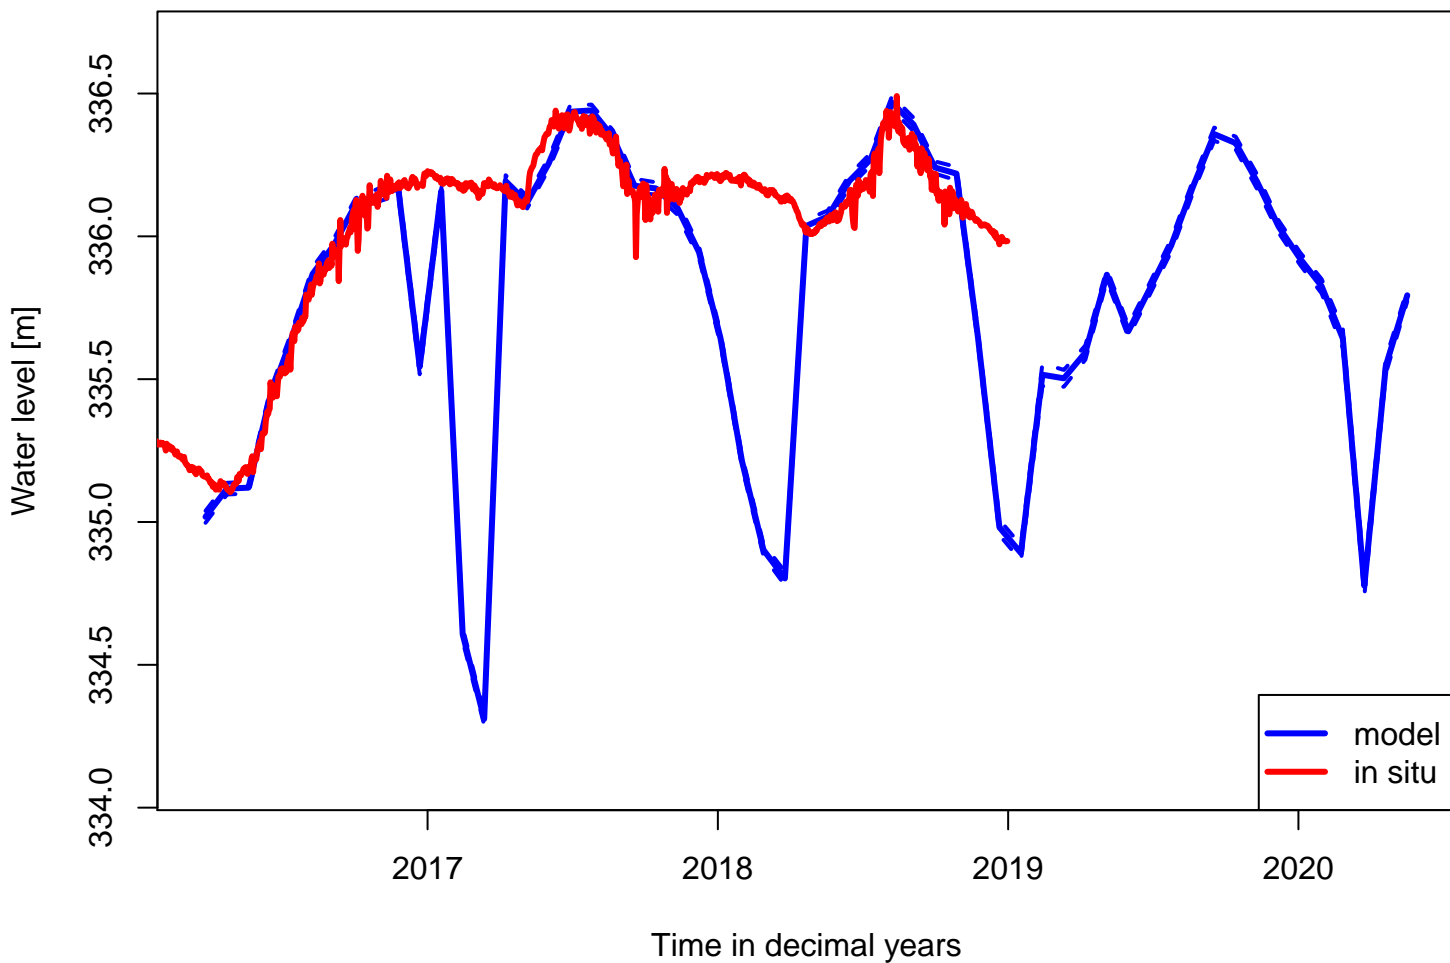

Supplement: s1 [file s1]

**lakename: Melville lakeid: 50 lat: 53.59 lon: -59.48**

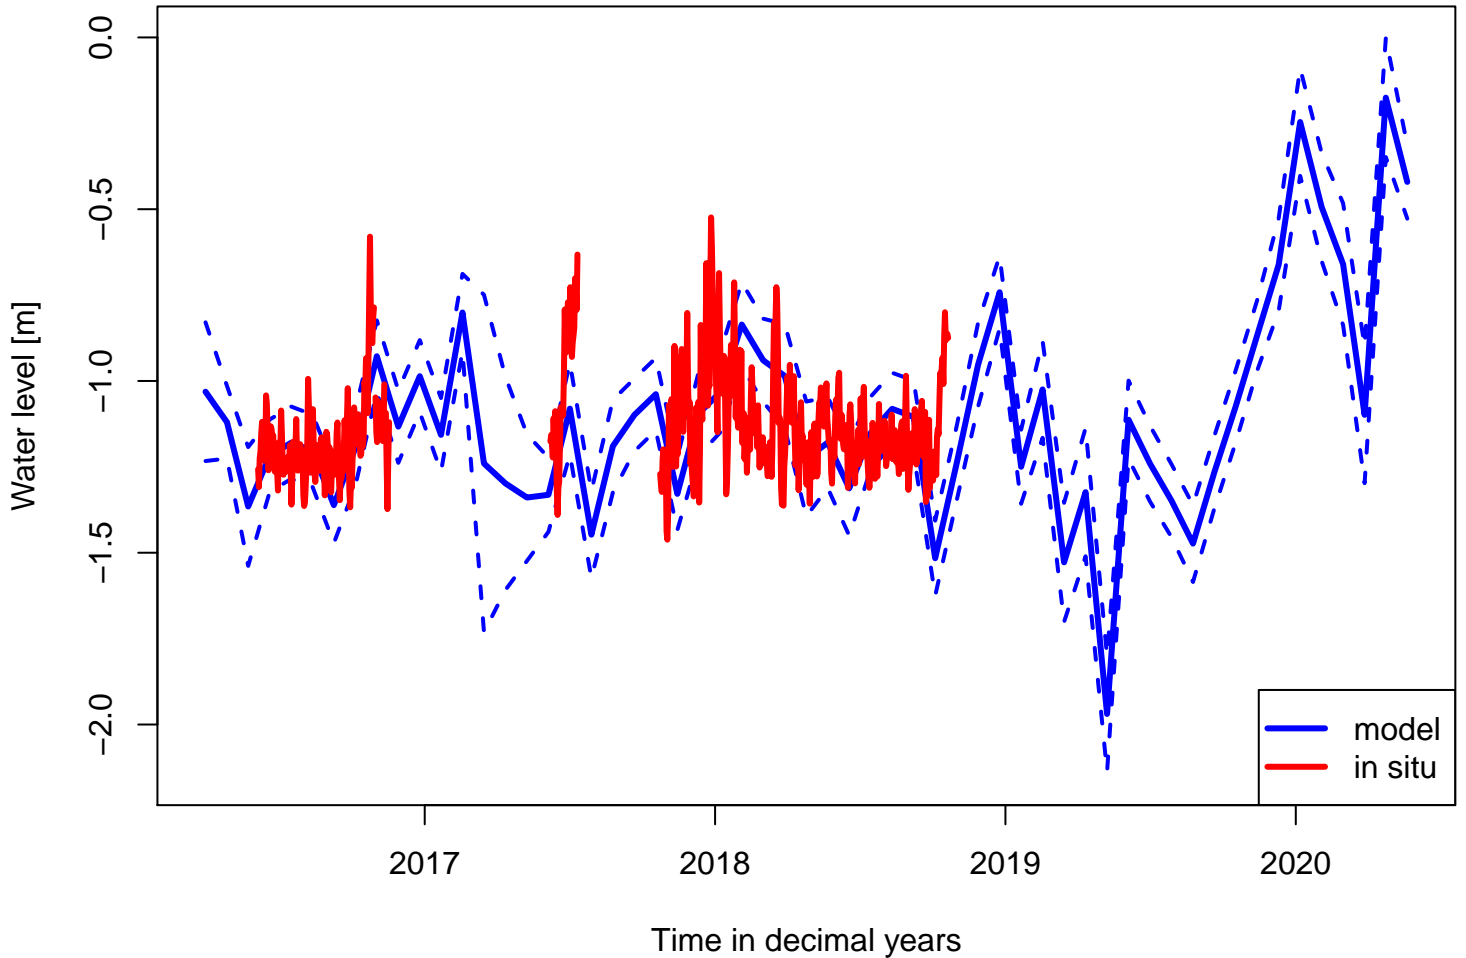

Supplement: s1 [file s1]

**lakename: Point lakeid: 278 lat: 65.4 lon: -114**

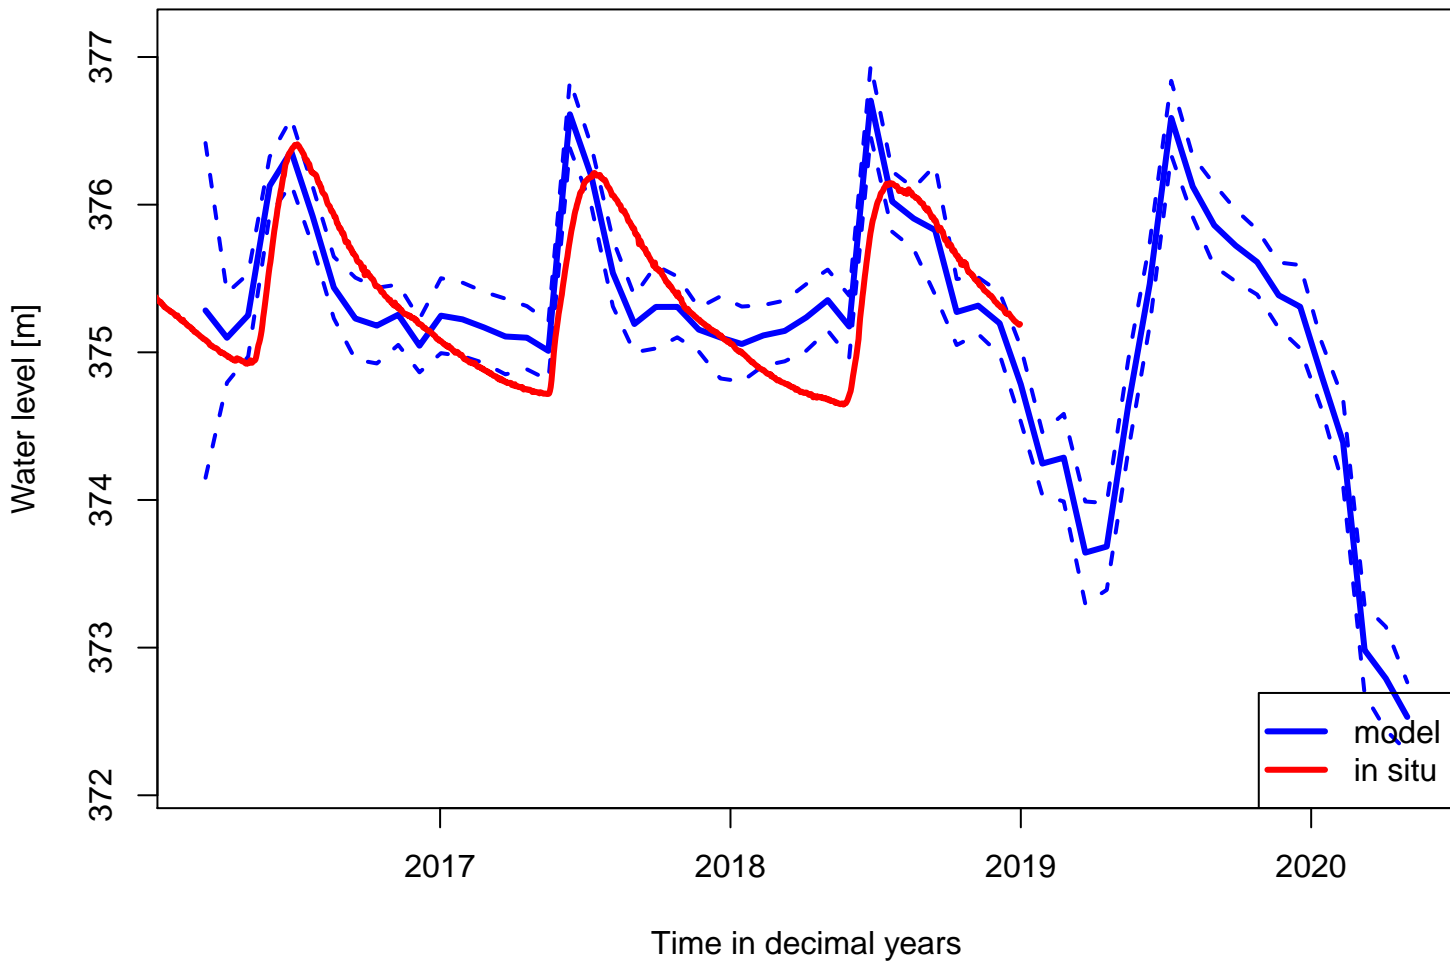

Supplement: s1 [file s1]

**lakename: lakeid: 5886 lat: 56.01 lon: -103.3**

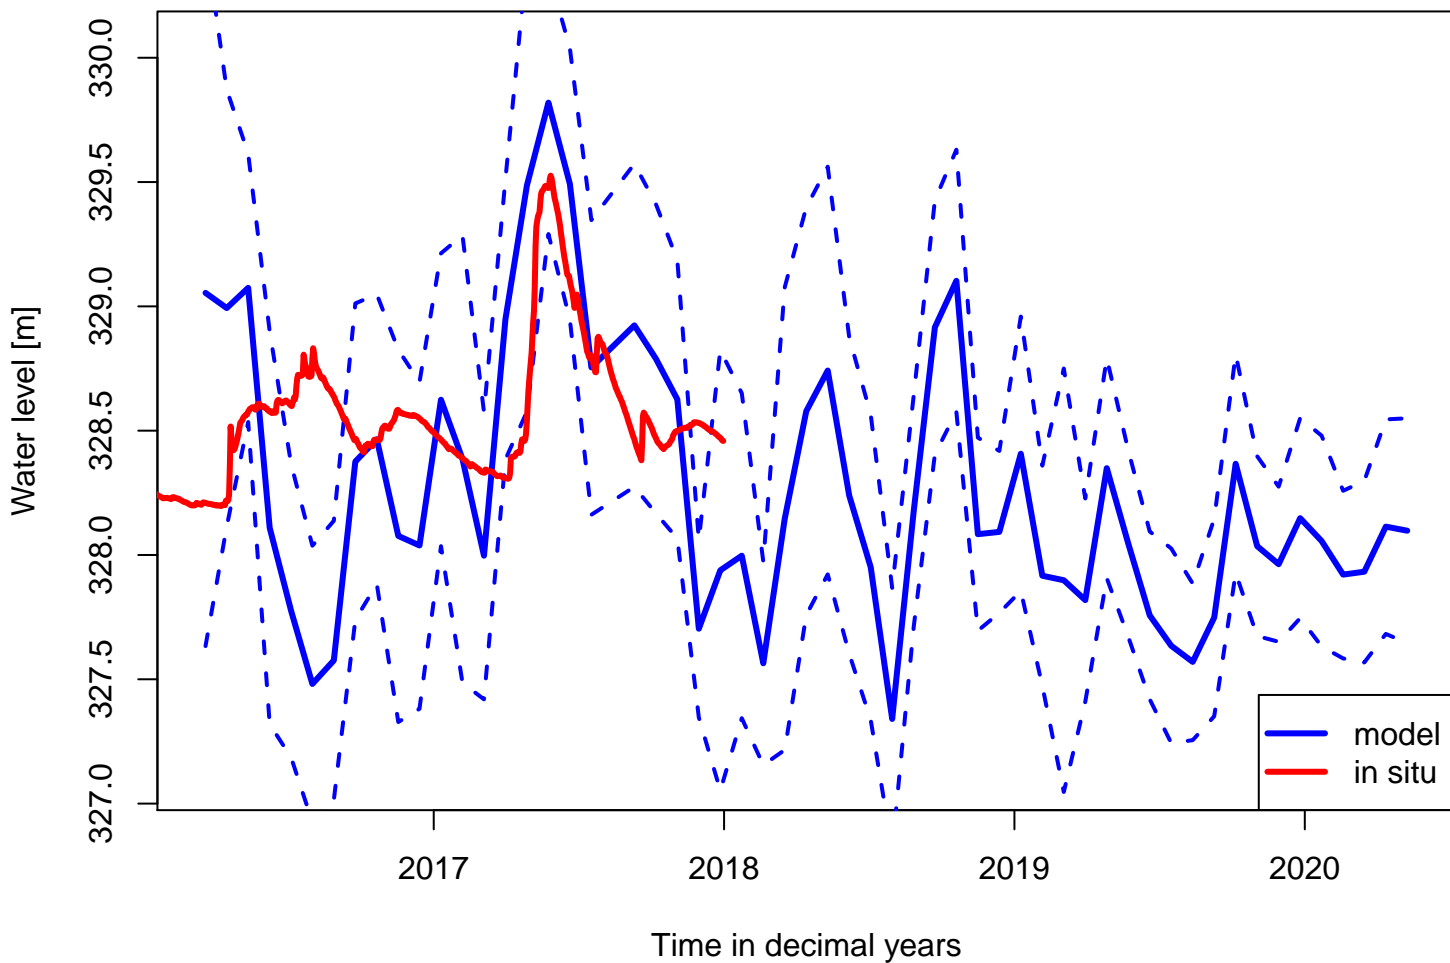

Supplement: s1 [file s1]

**lakename: Winnebago lakeid: 762 lat: 44.07 lon: -88.33**

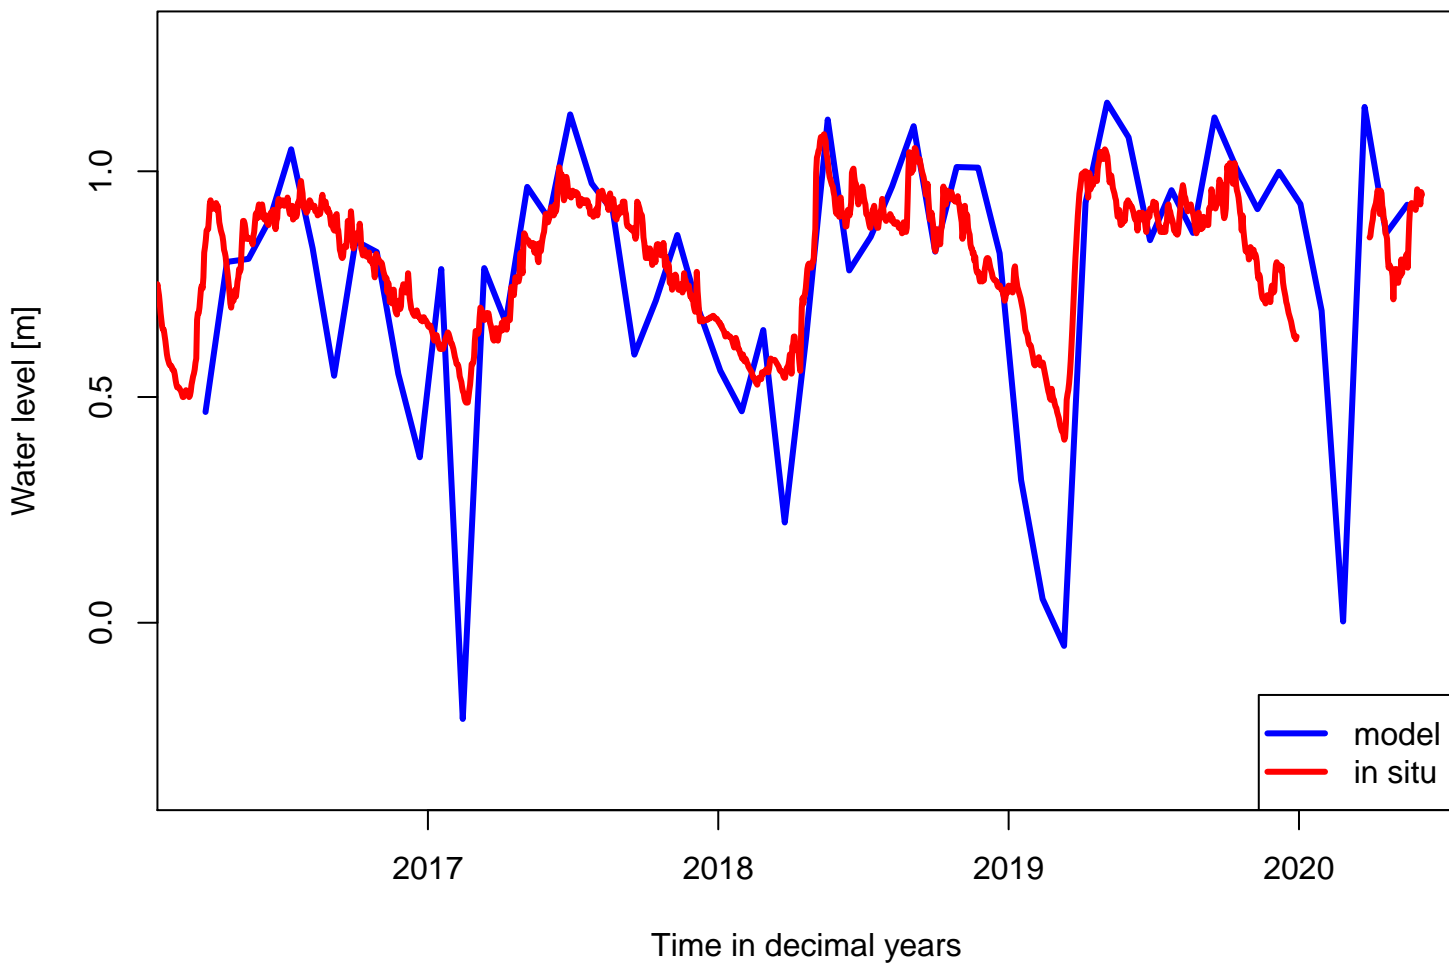

Supplement: s1 [file s1]

**lakename: Contwoyto lakeid: 22 lat: 65.78 lon: -111.2**

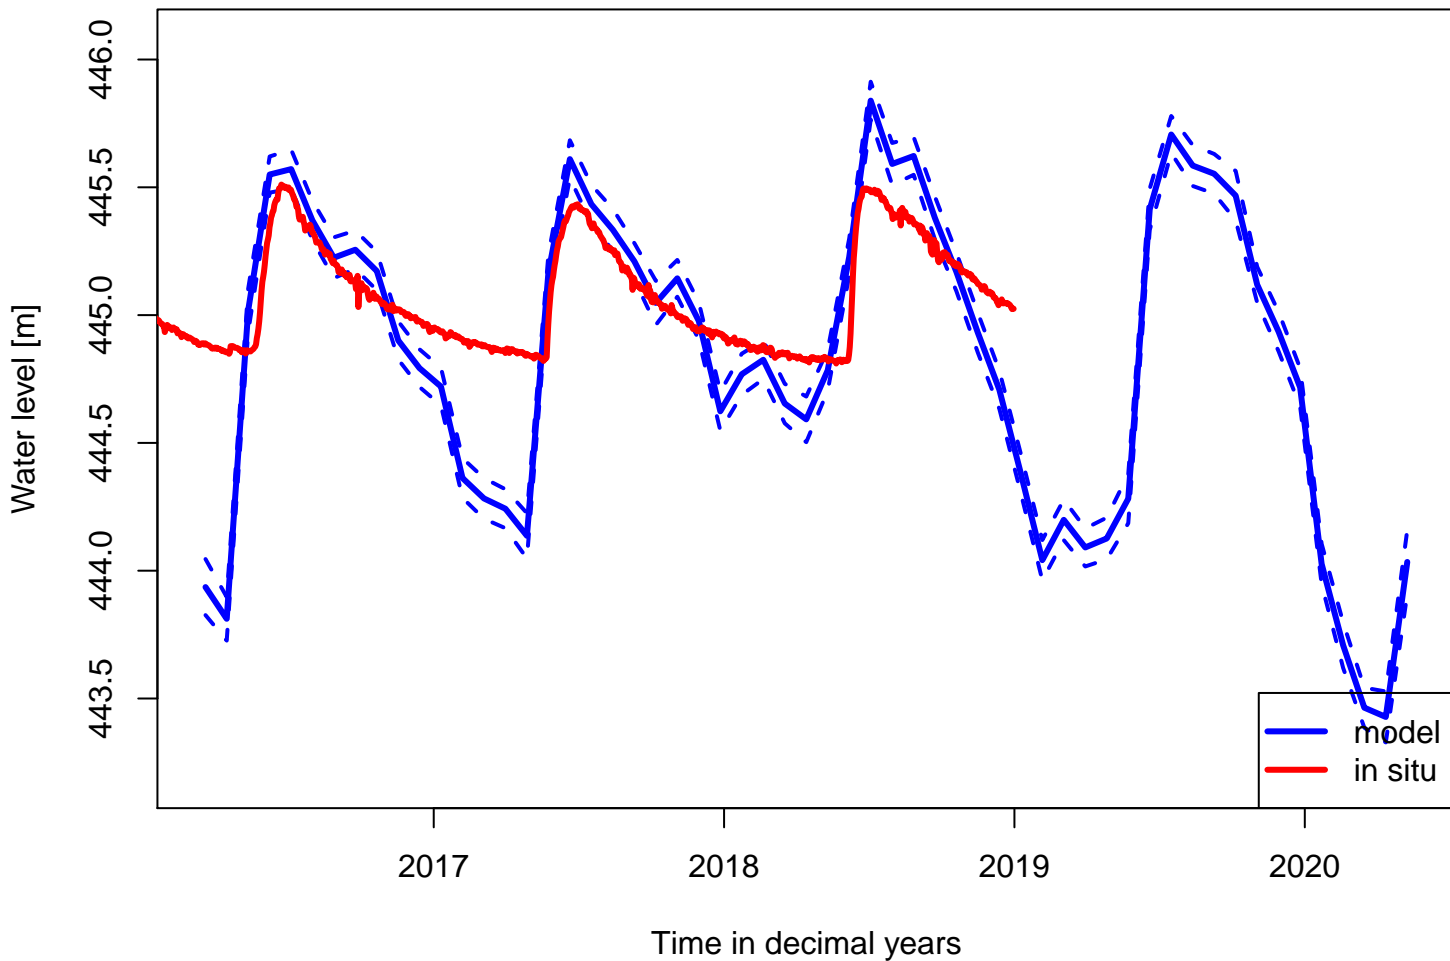

Supplement: s1 [file s1]

**lakename: lakeid: 691 lat: 49.62 lon: -95.21**

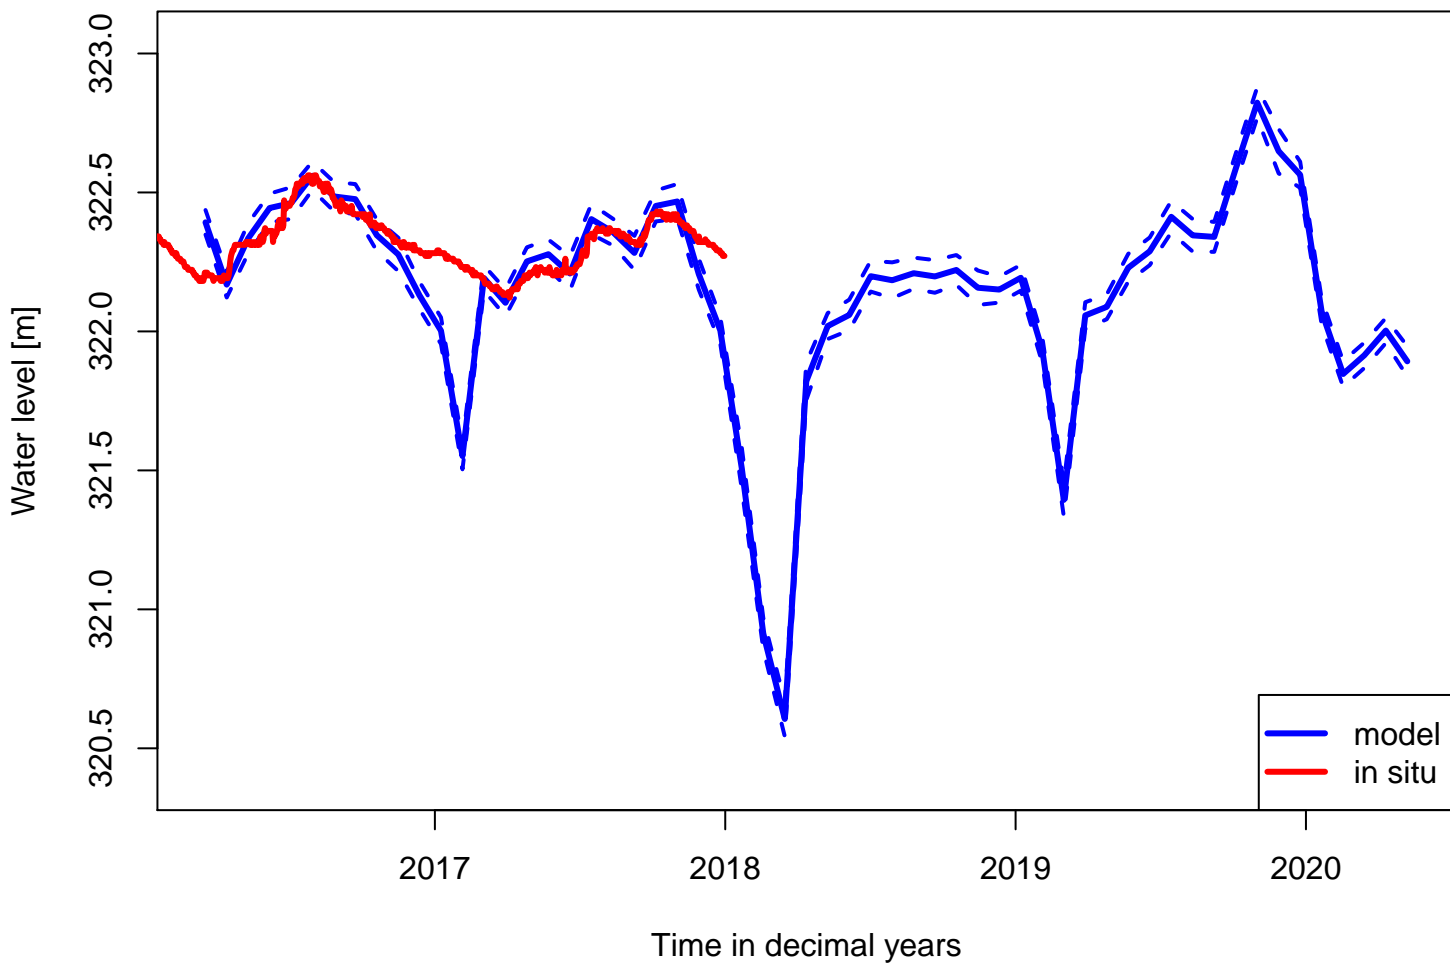

Supplement: s1 [file s1]

**lakename: Cedar lakeid: 51 lat: 53.32 lon: -100.3**

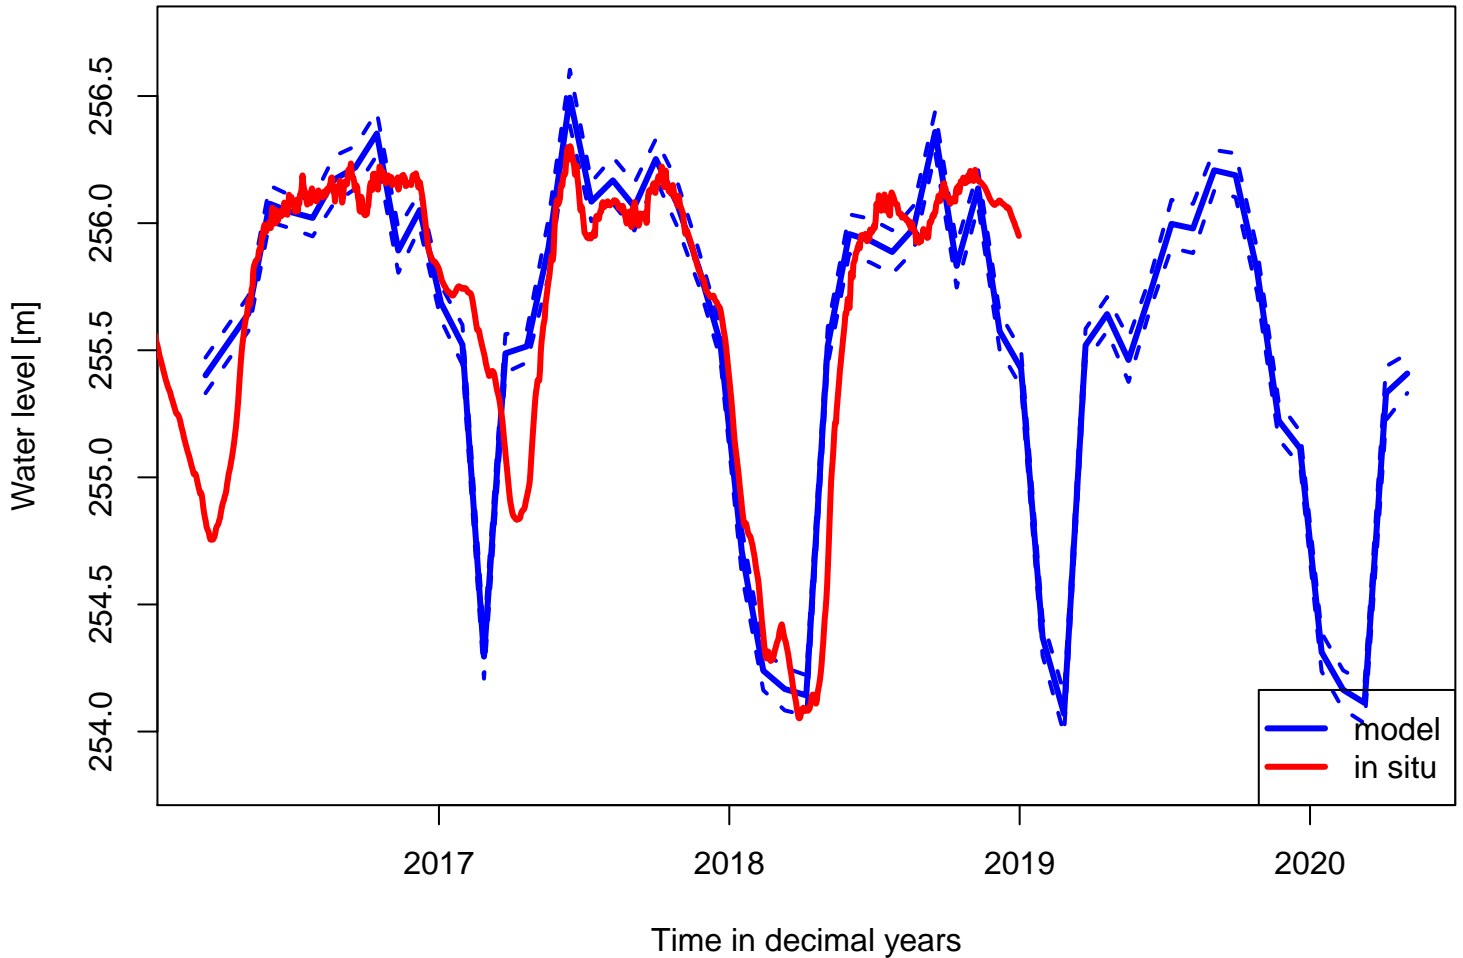

Supplement: s1 [file s1]

**lakename: Red Lake Reservoir lakeid: 61 lat: 47.96 lon: -95.28**

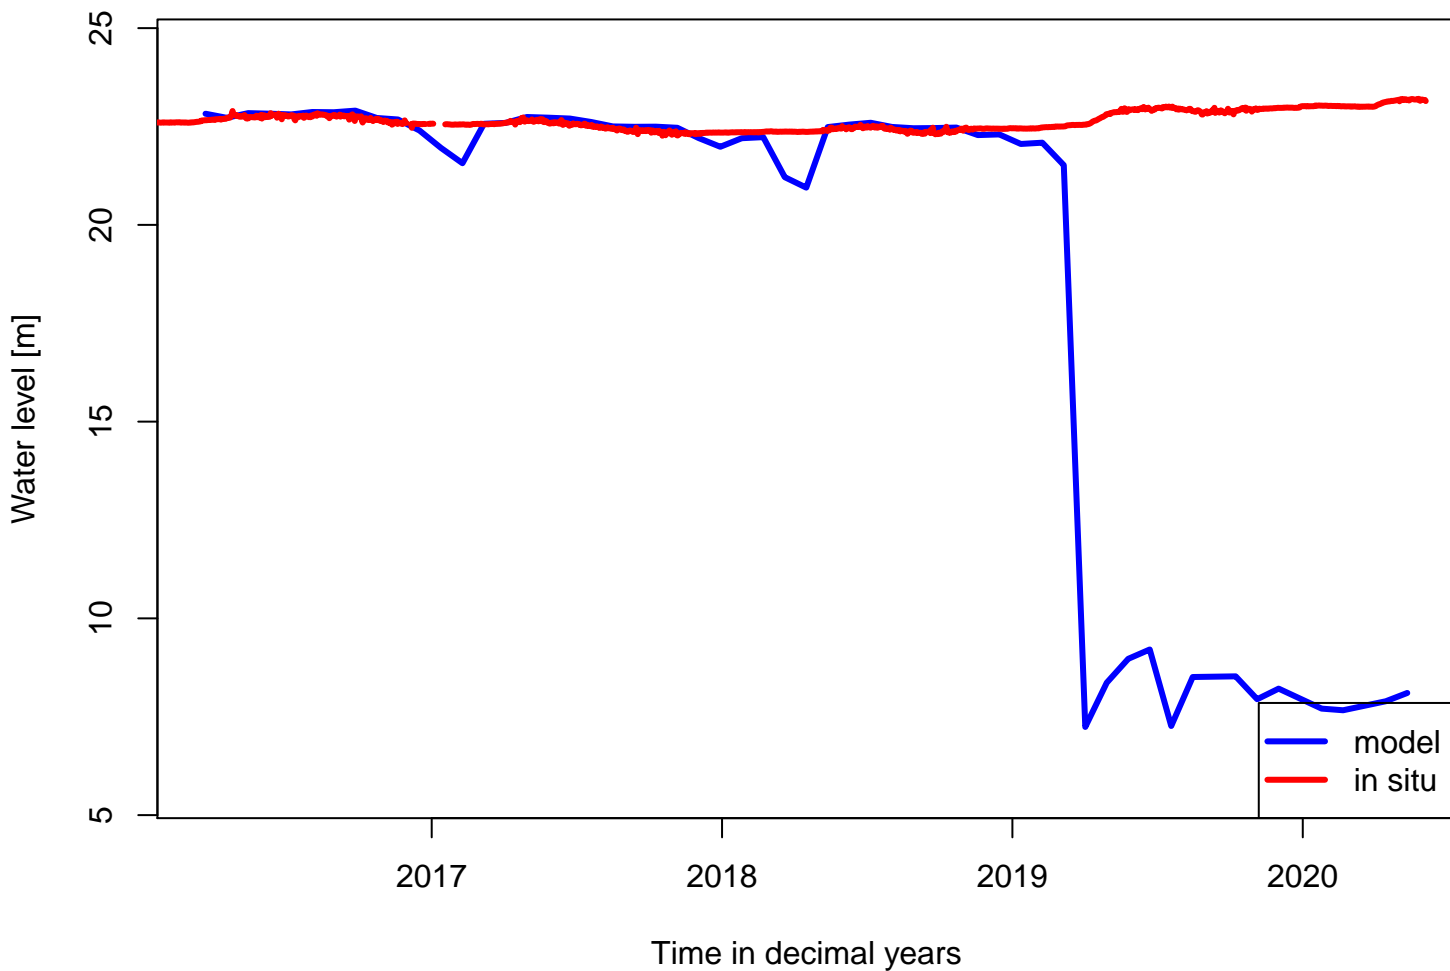

Supplement: s1 [file s1]

**lakename: Sipiwesk lakeid: 520 lat: 55.09 lon: -97.5**

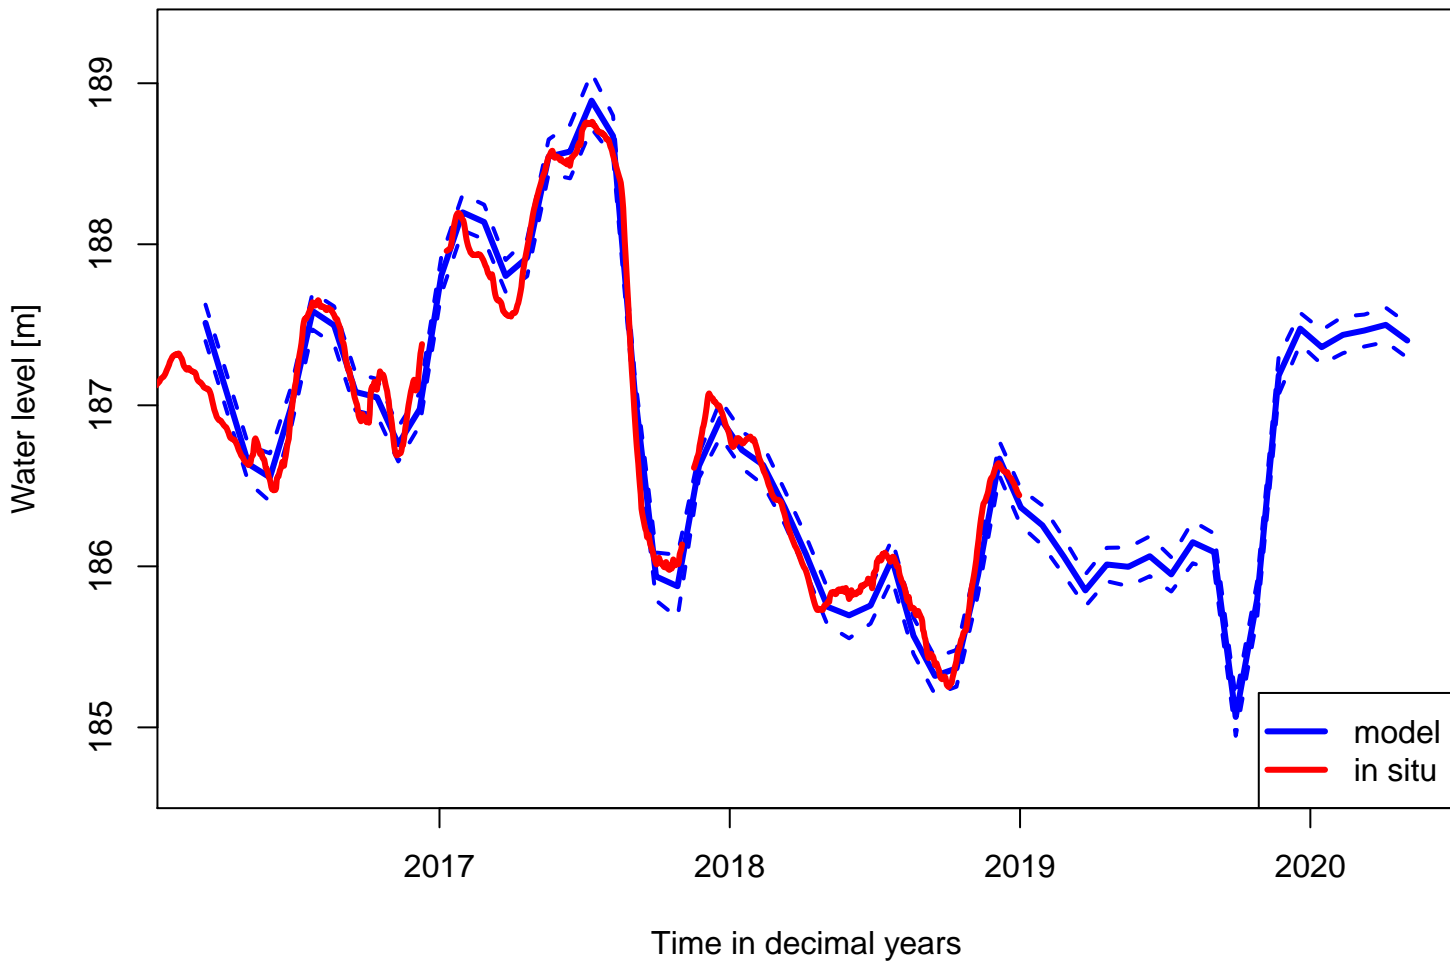

Supplement: s1 [file s1]

**lakename: lakeid: 6354 lat: 54.62 lon: -97.79**

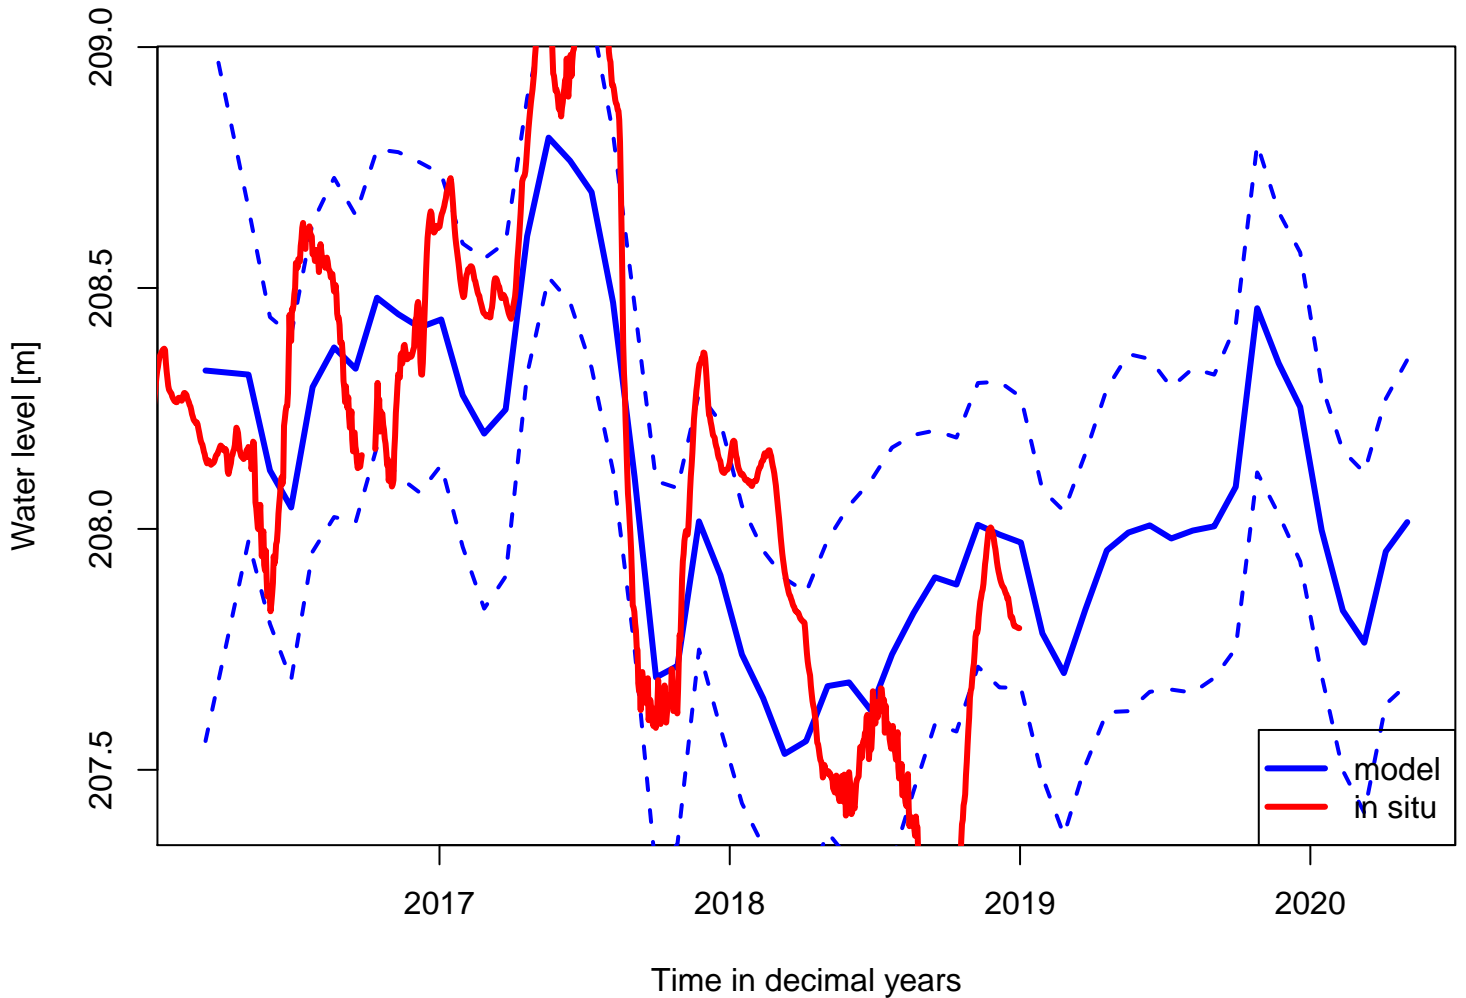

Supplement: s1 [file s1]

**lakename: Walker Lake lakeid: 795 lat: 38.68 lon: -118.8**

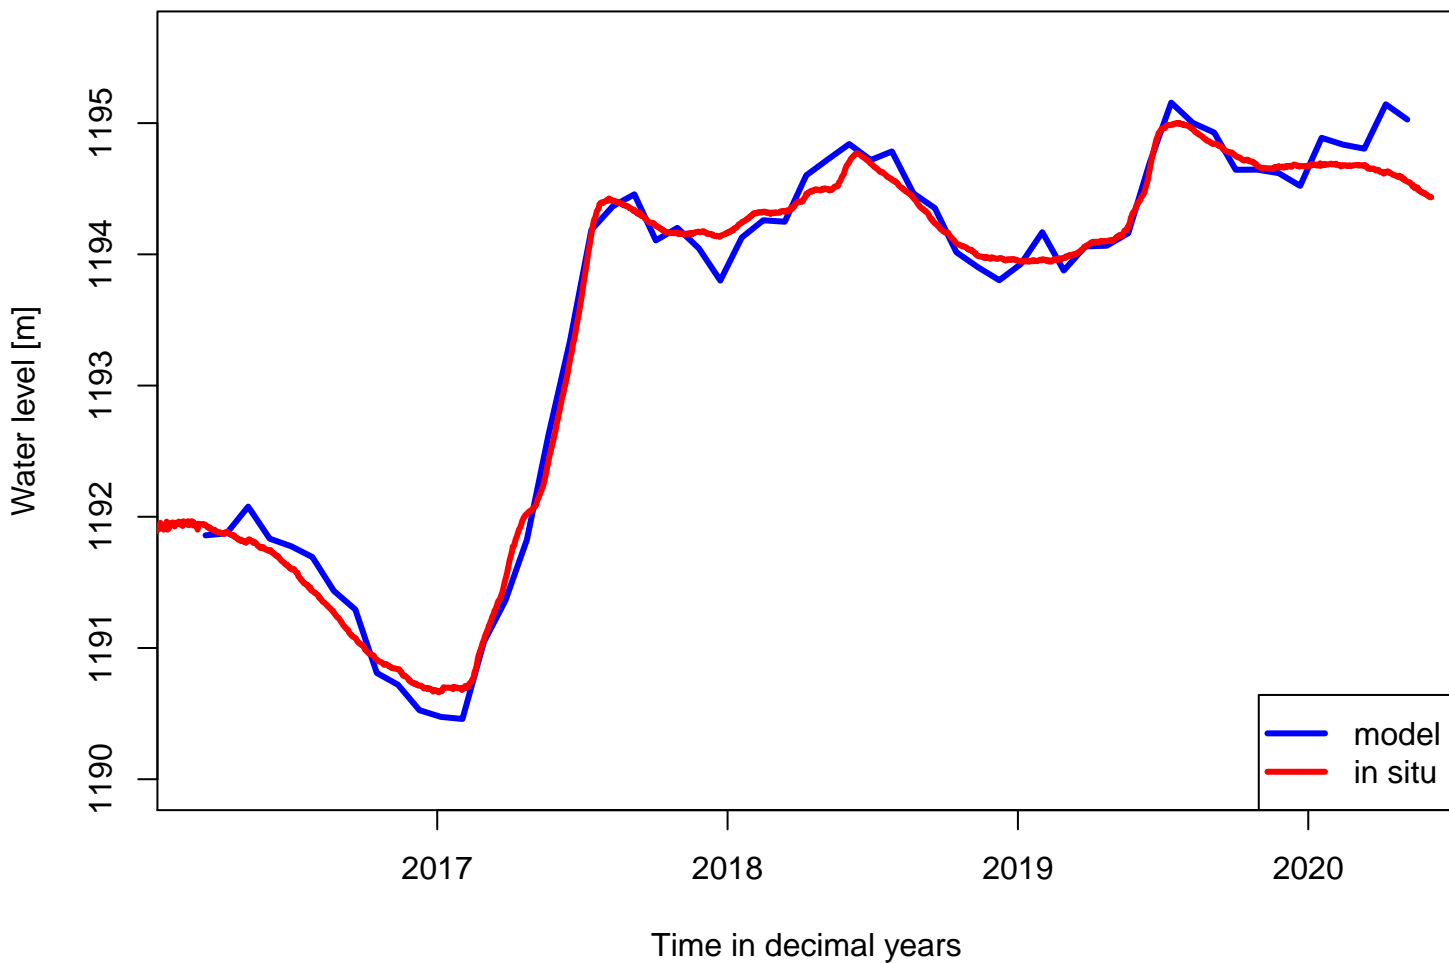

Supplement: s1 [file s1]

**lakename: Cold lakeid: 551 lat: 54.47 lon: -110.2**

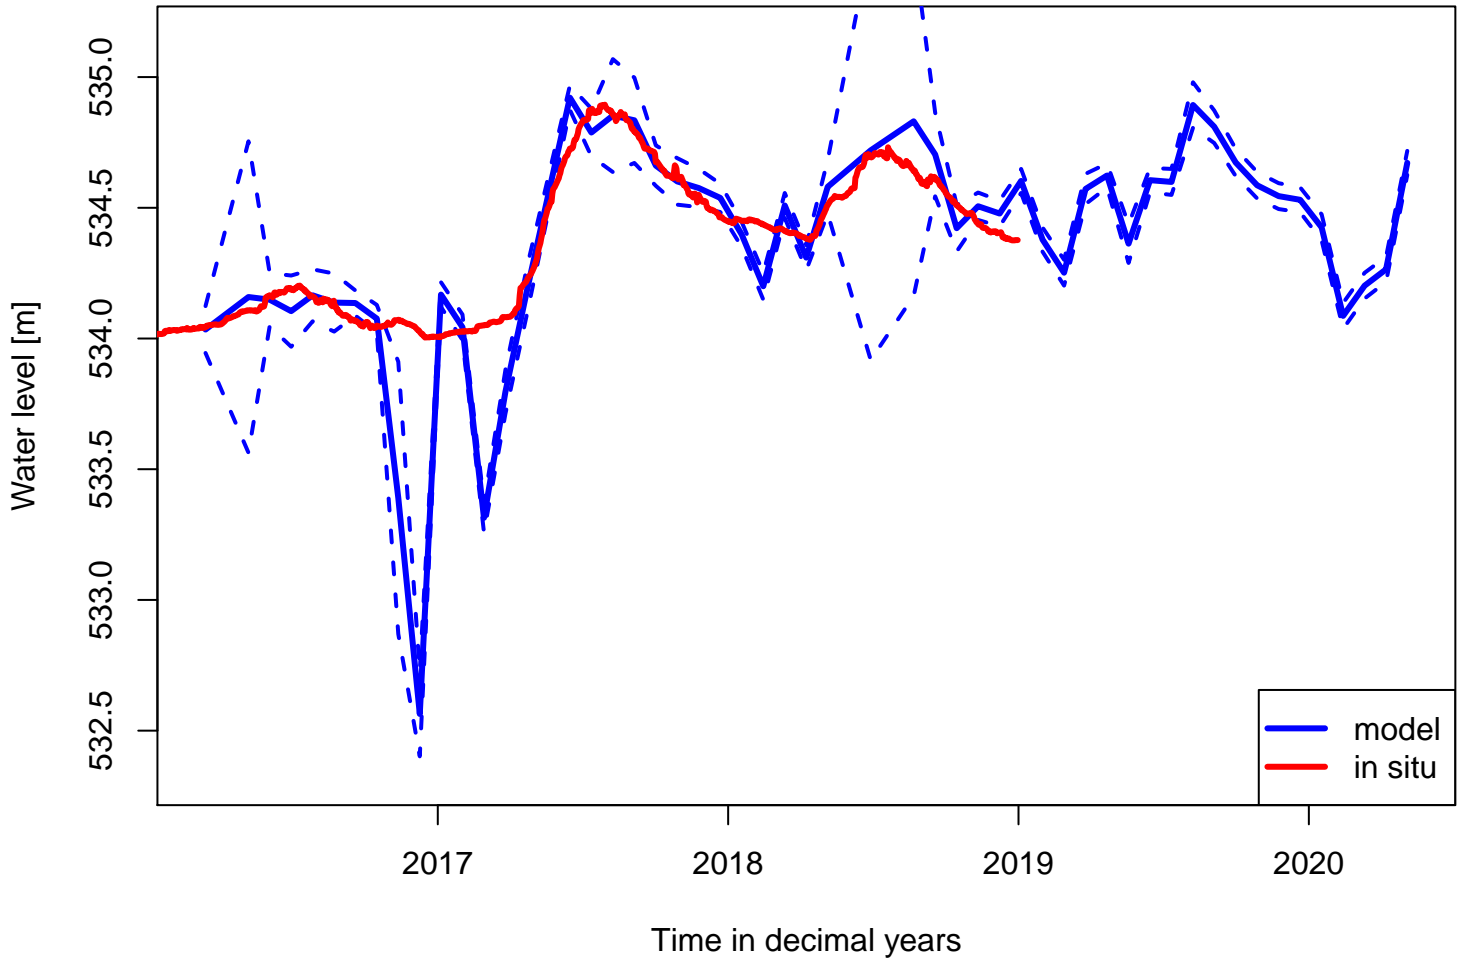

Supplement: s1 [file s1]

**lakename: Point lakeid: 278 lat: 65.4 lon: -114**

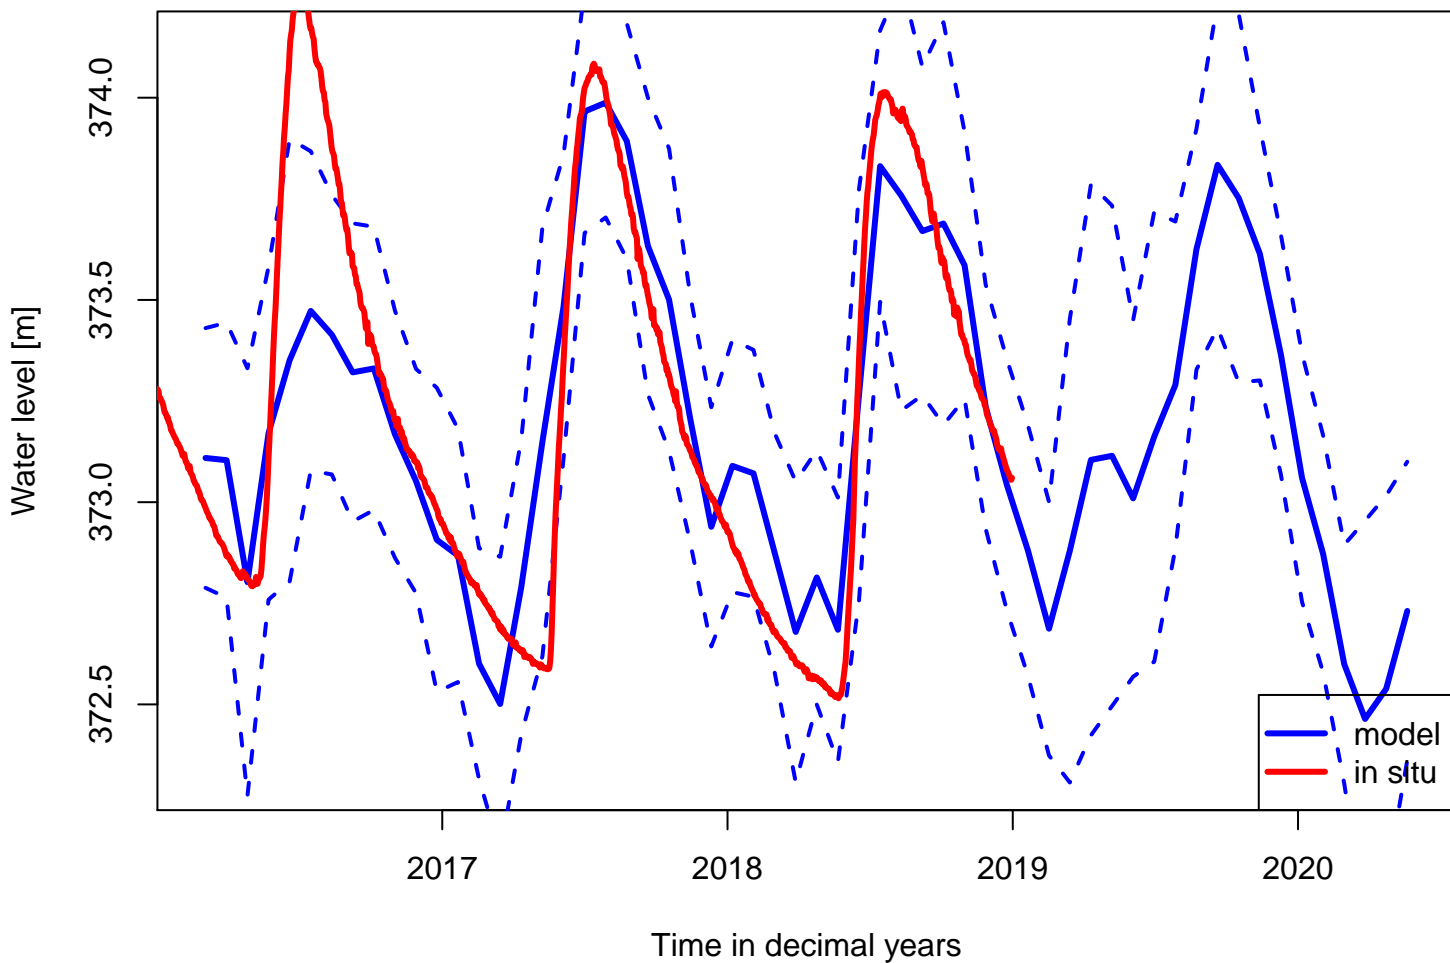

Supplement: s1 [file s1]

**lakename: Winnipegosis lakeid: 52 lat: 52.97 lon: -101**

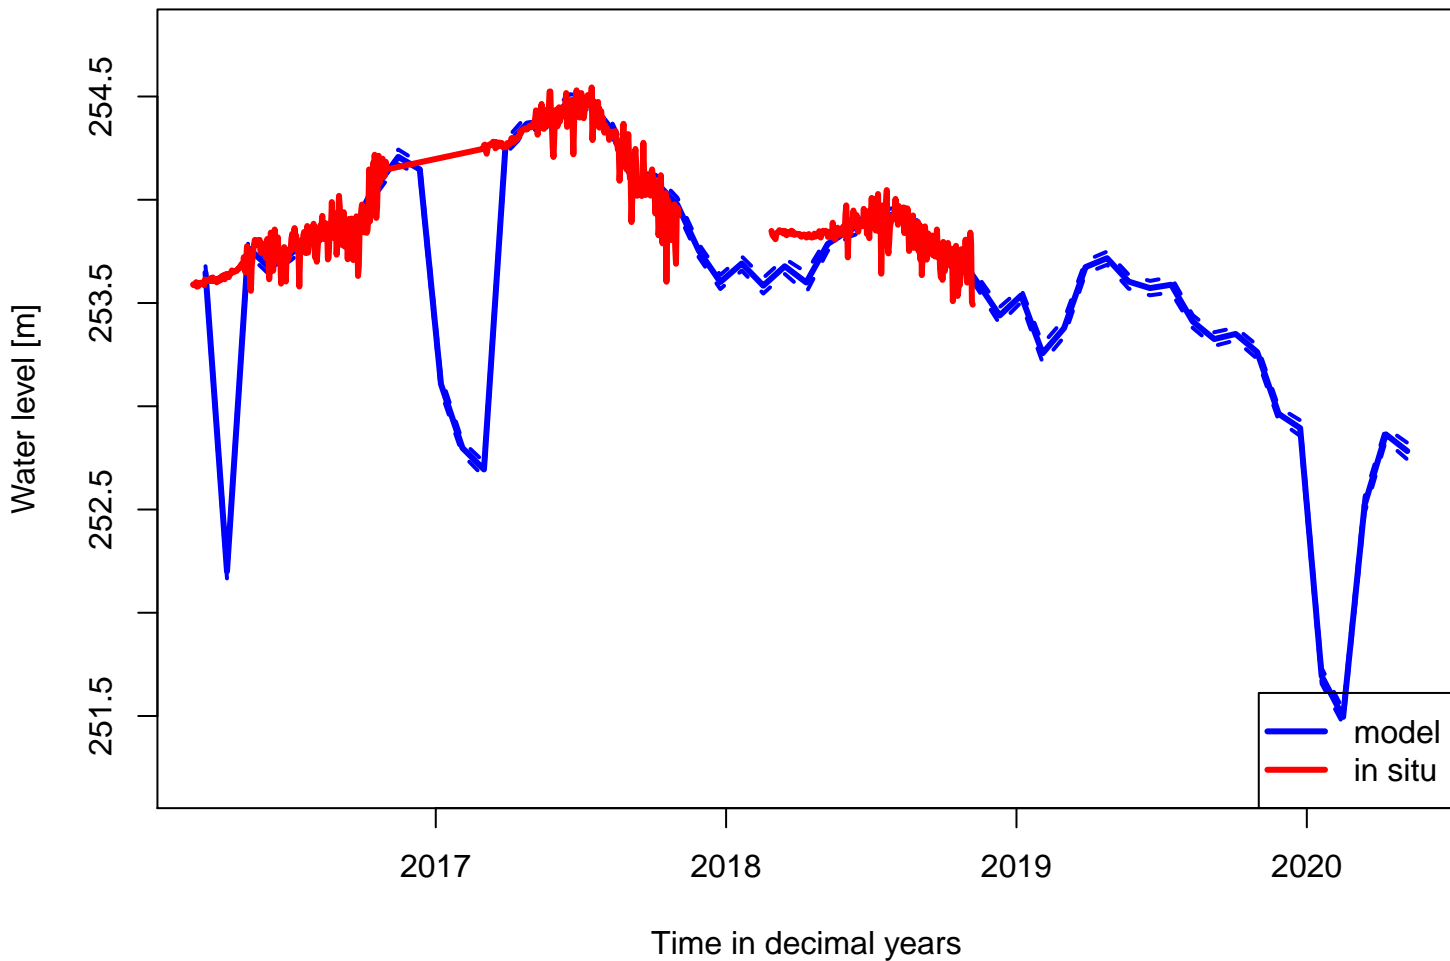

Supplement: s1 [file s1]

**lakename: Black lakeid: 425 lat: 59.15 lon: -105.5**

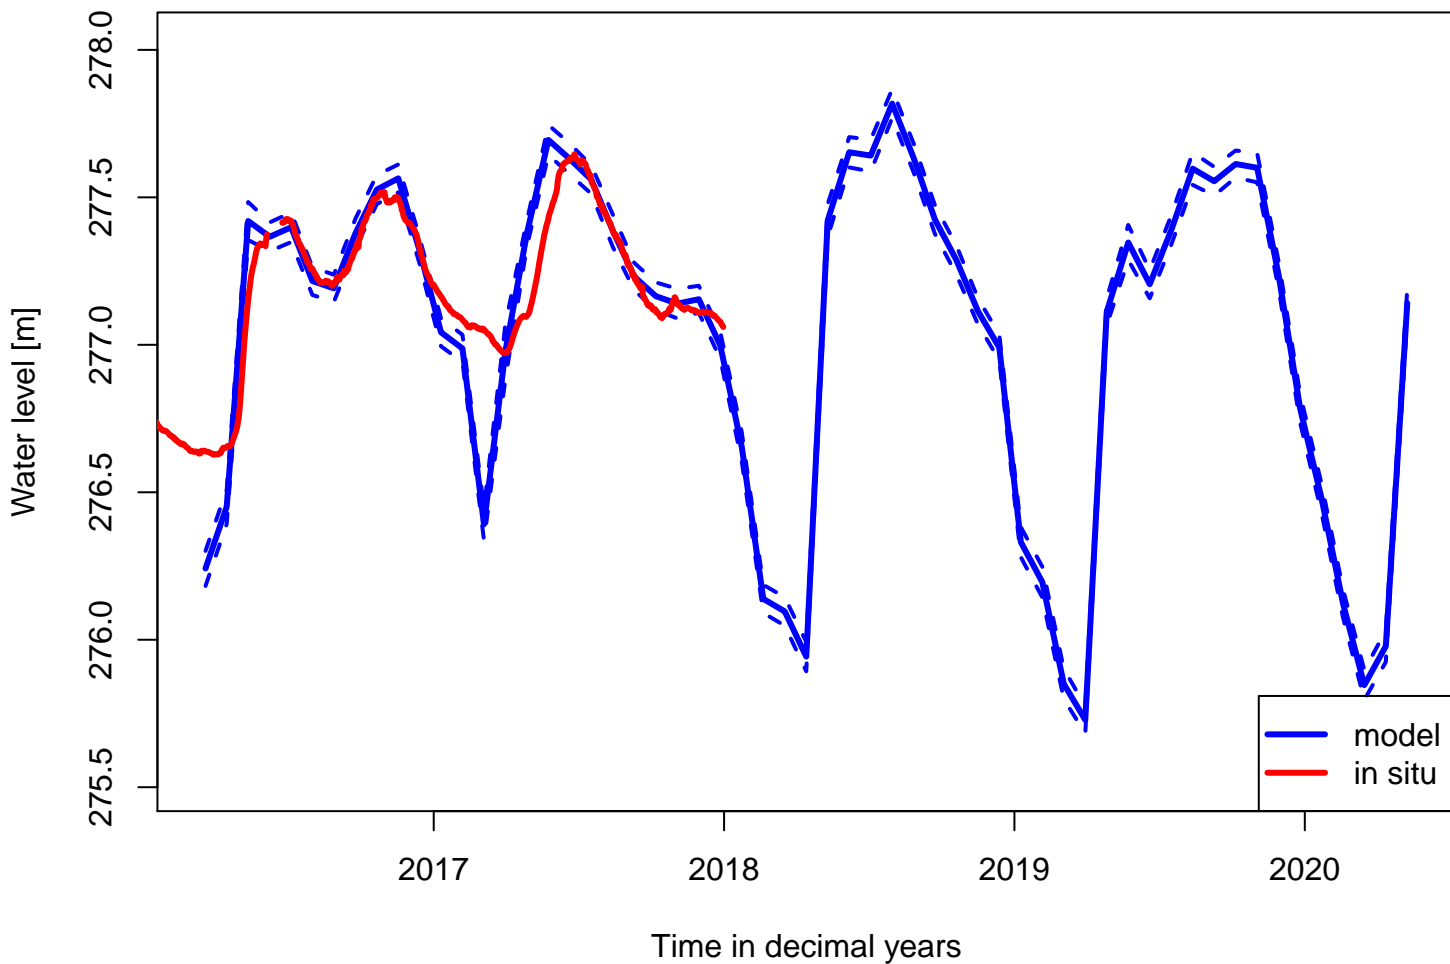

Supplement: s1 [file s1]

**lakename: Lake Powell lakeid: 802 lat: 36.94 lon: -111.5**

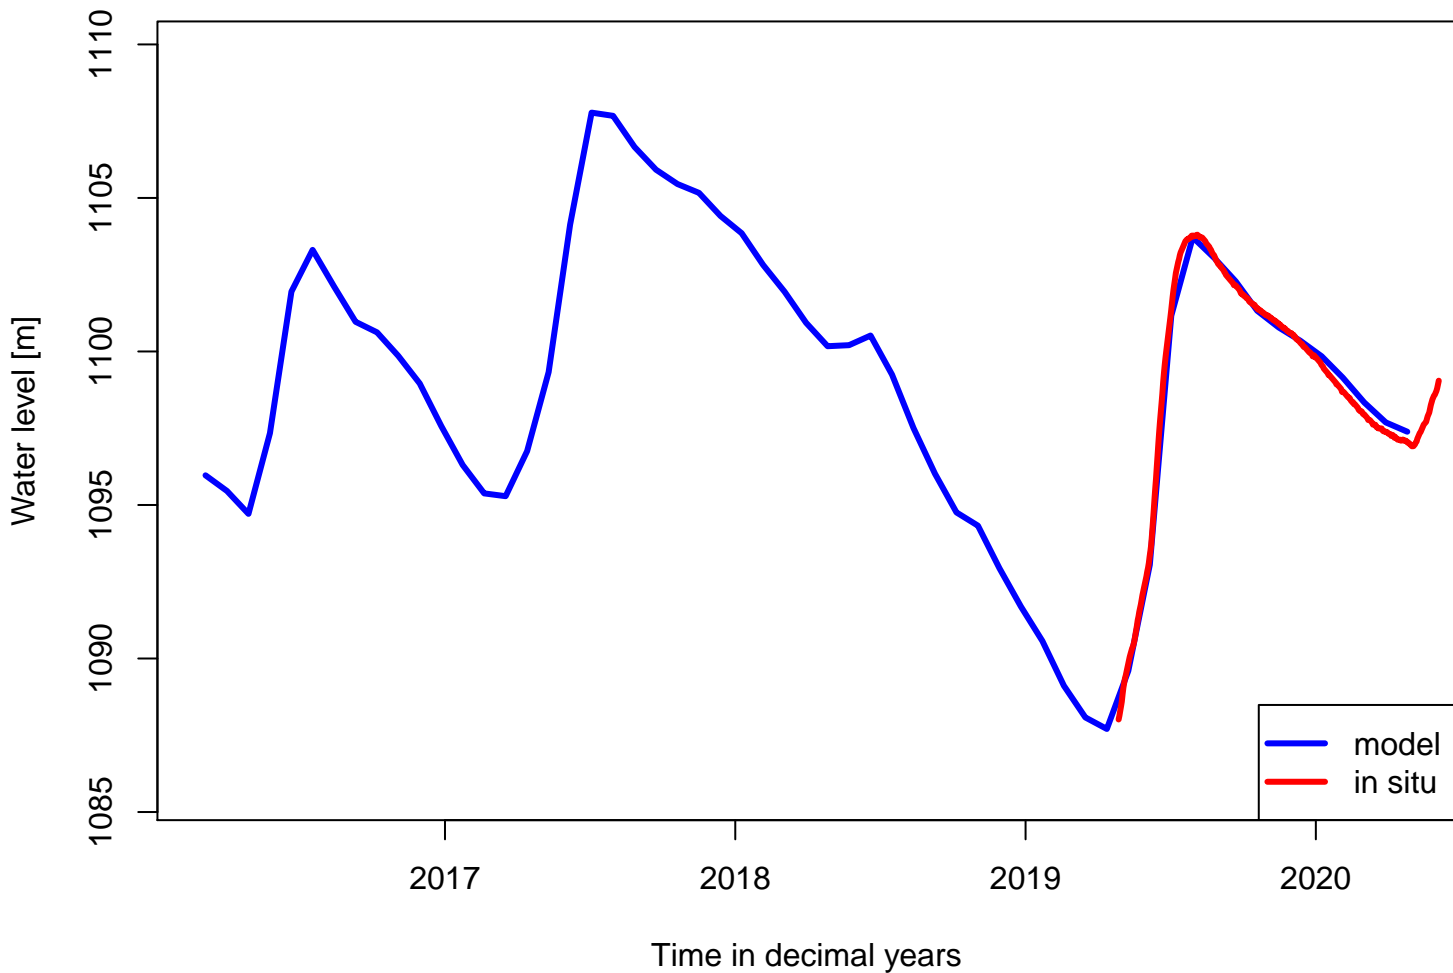

Supplement: s1 [file s1]

**lakename: Point lakeid: 278 lat: 65.4 lon: -114**

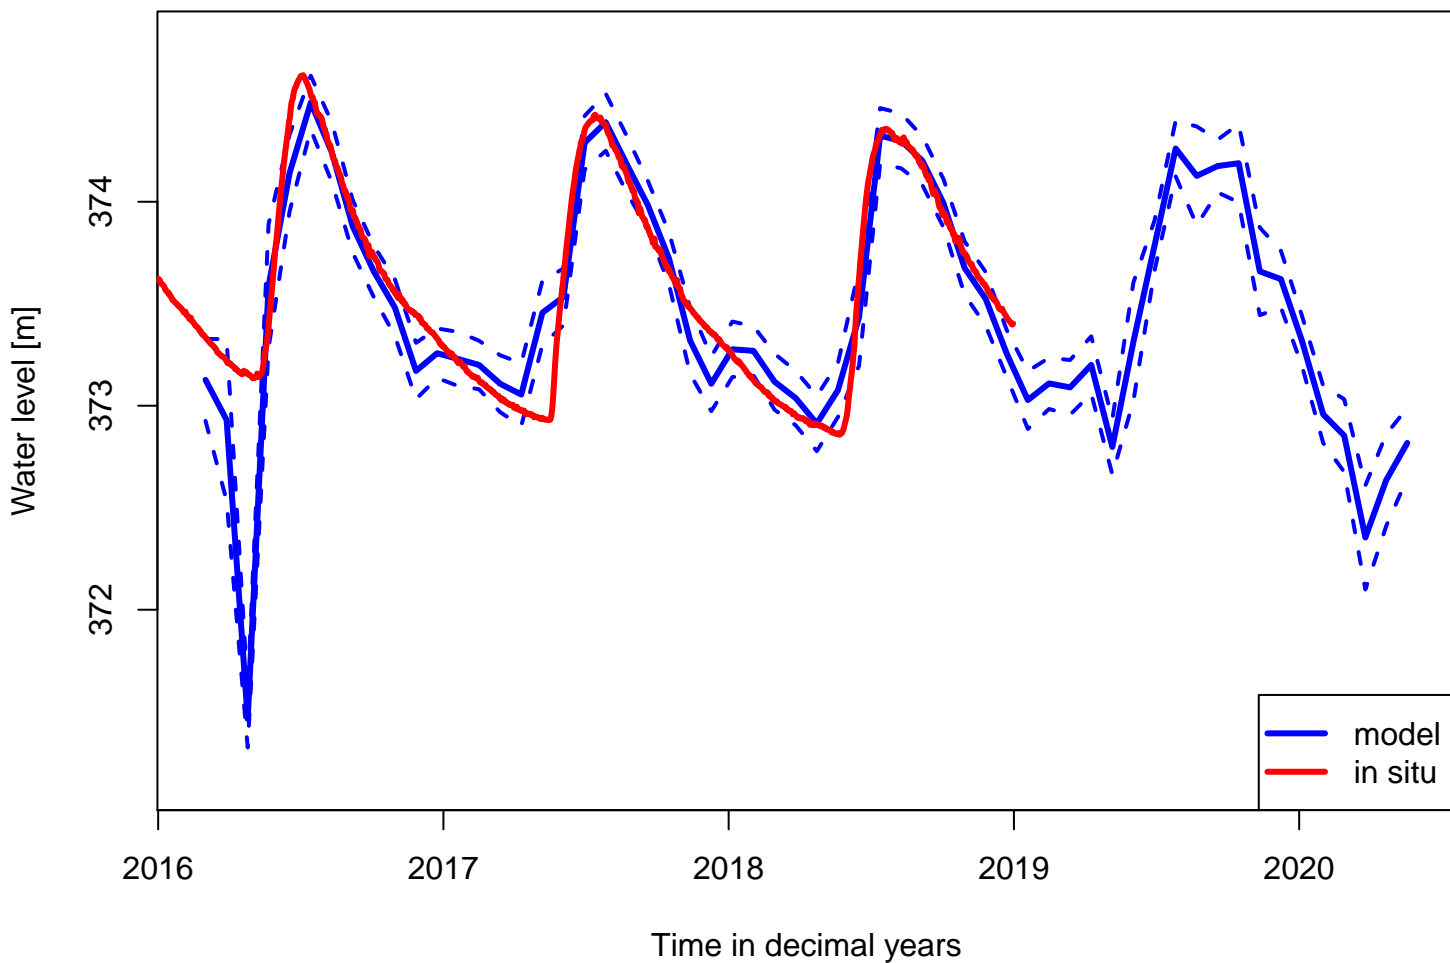

Supplement: s1 [file s1]

**lakename: Kiskittogisu lakeid: 553 lat: 54.44 lon: -98**

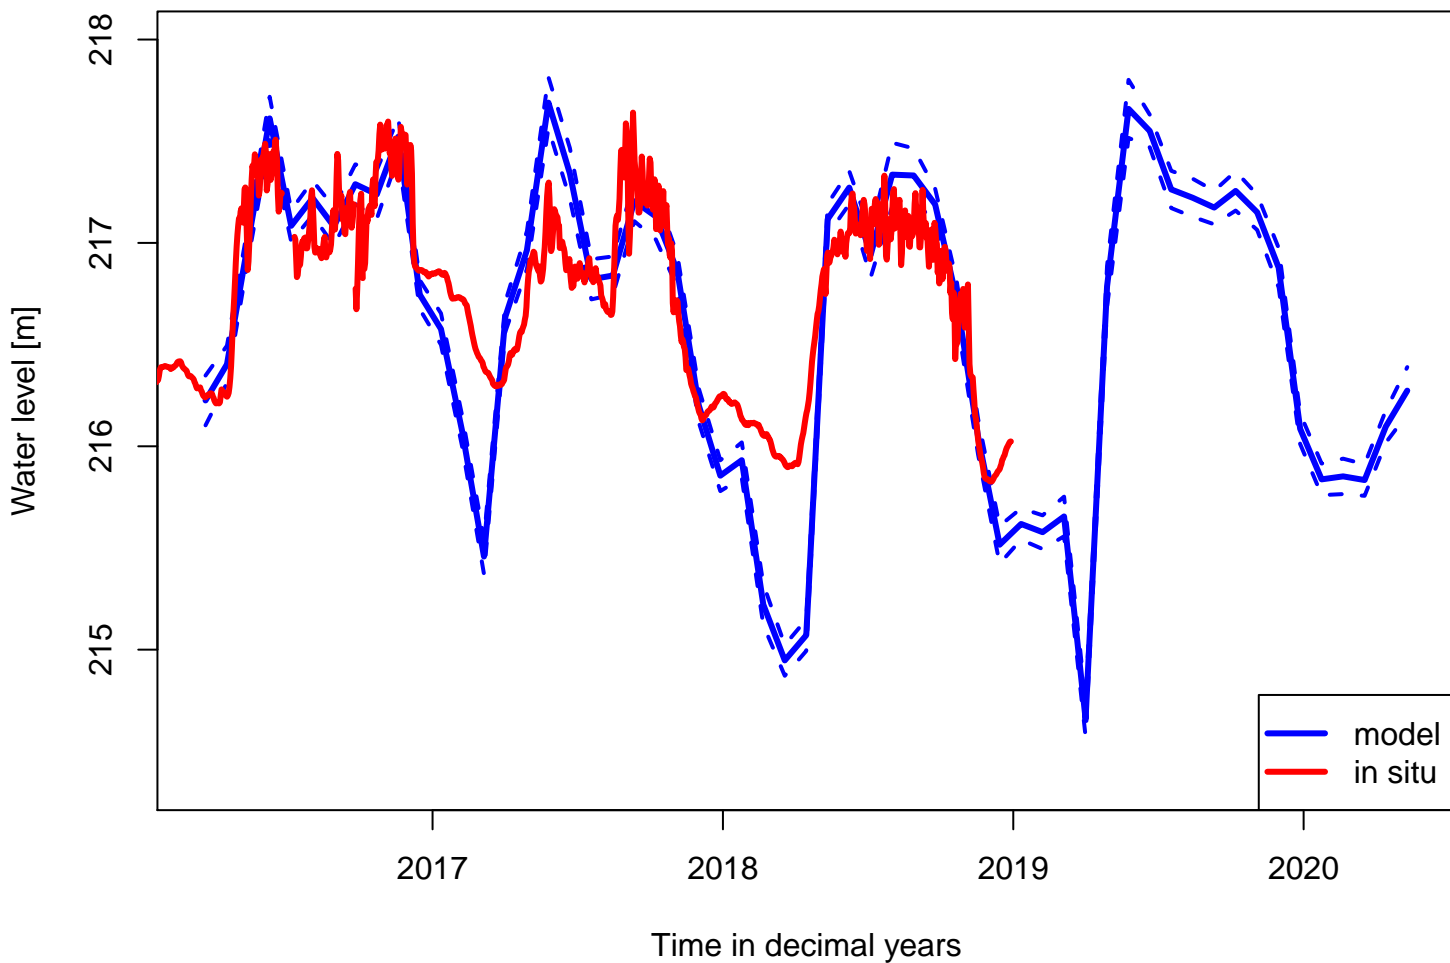

Supplement: s1 [file s1]

**lakename: Nonacho lakeid: 359 lat: 61.73 lon: -109.7**

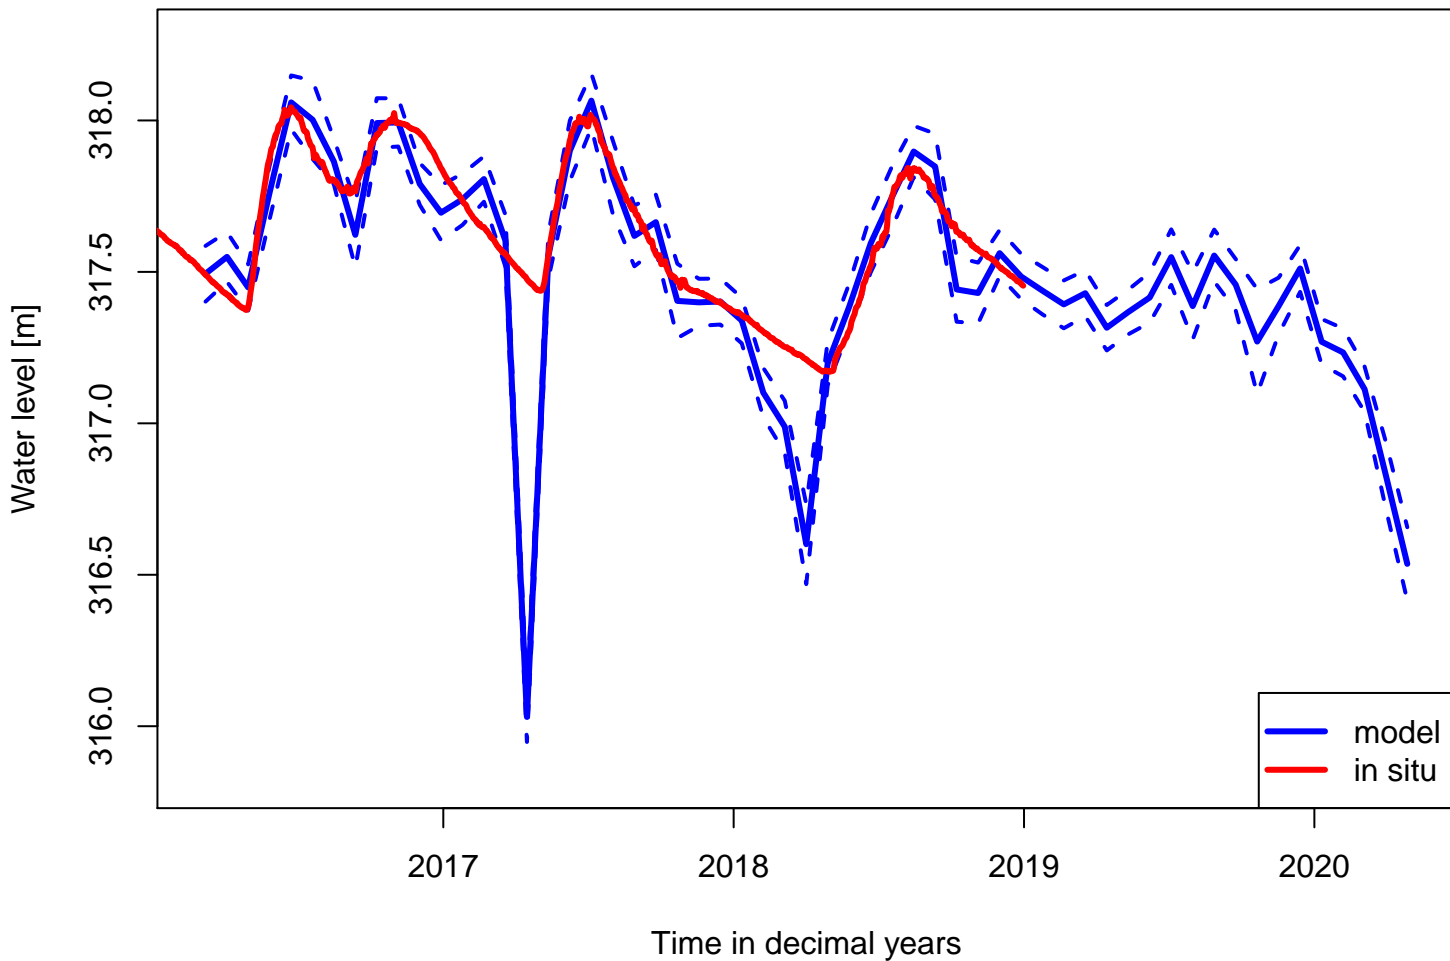

Supplement: s1 [file s1]

**lakename: lakeid: 7173 lat: 52.53 lon: -93.05**

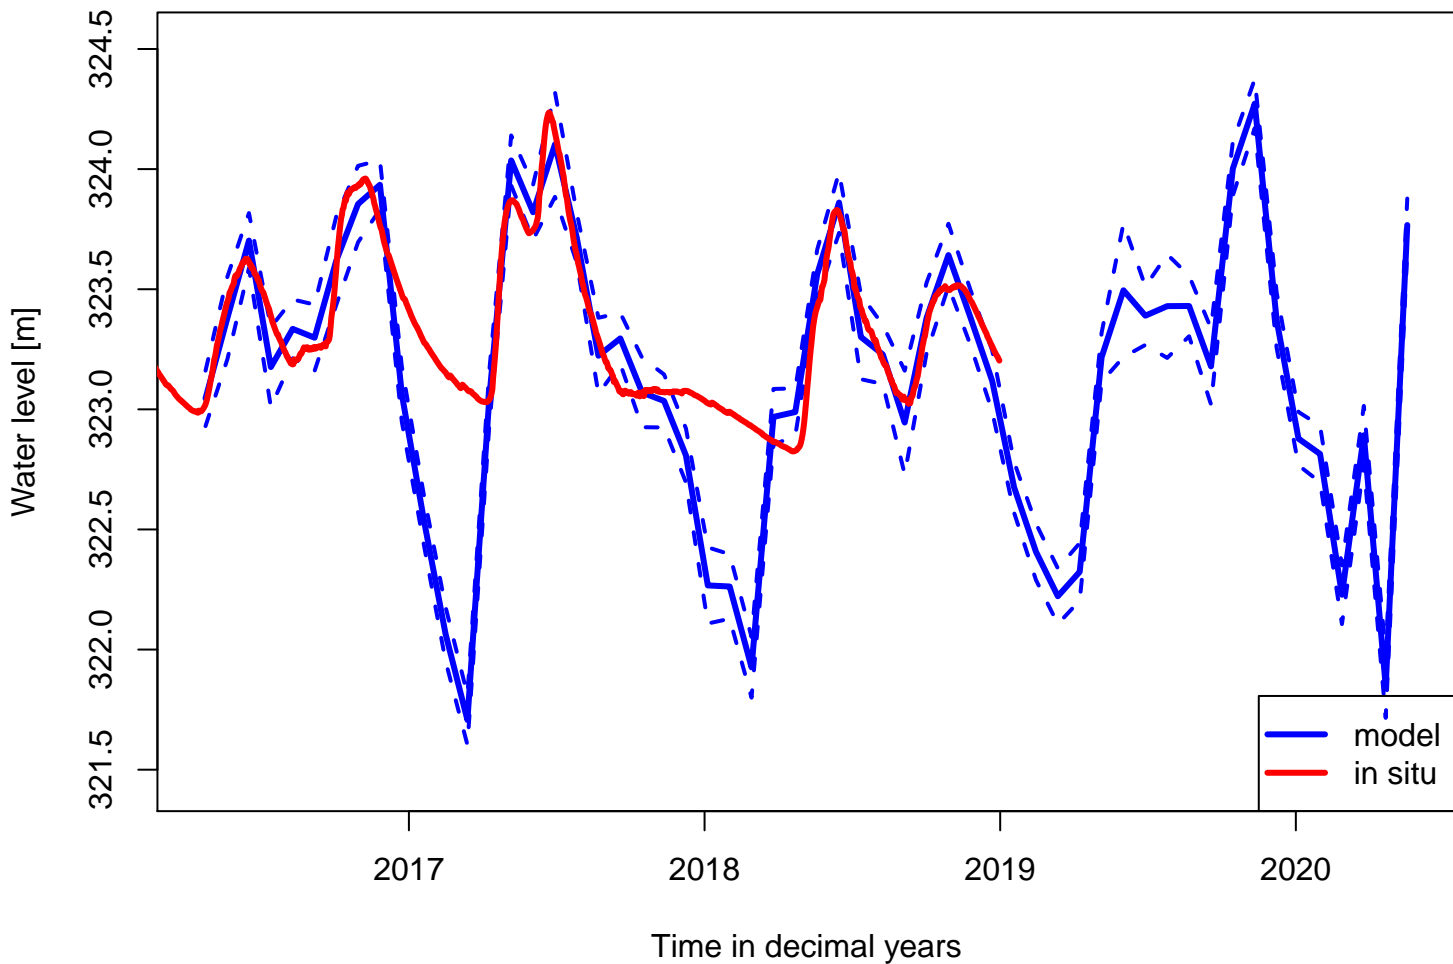

Supplement: s1 [file s1]

**lakename: lakeid: 713 lat: 48.5 lon: -92.66**

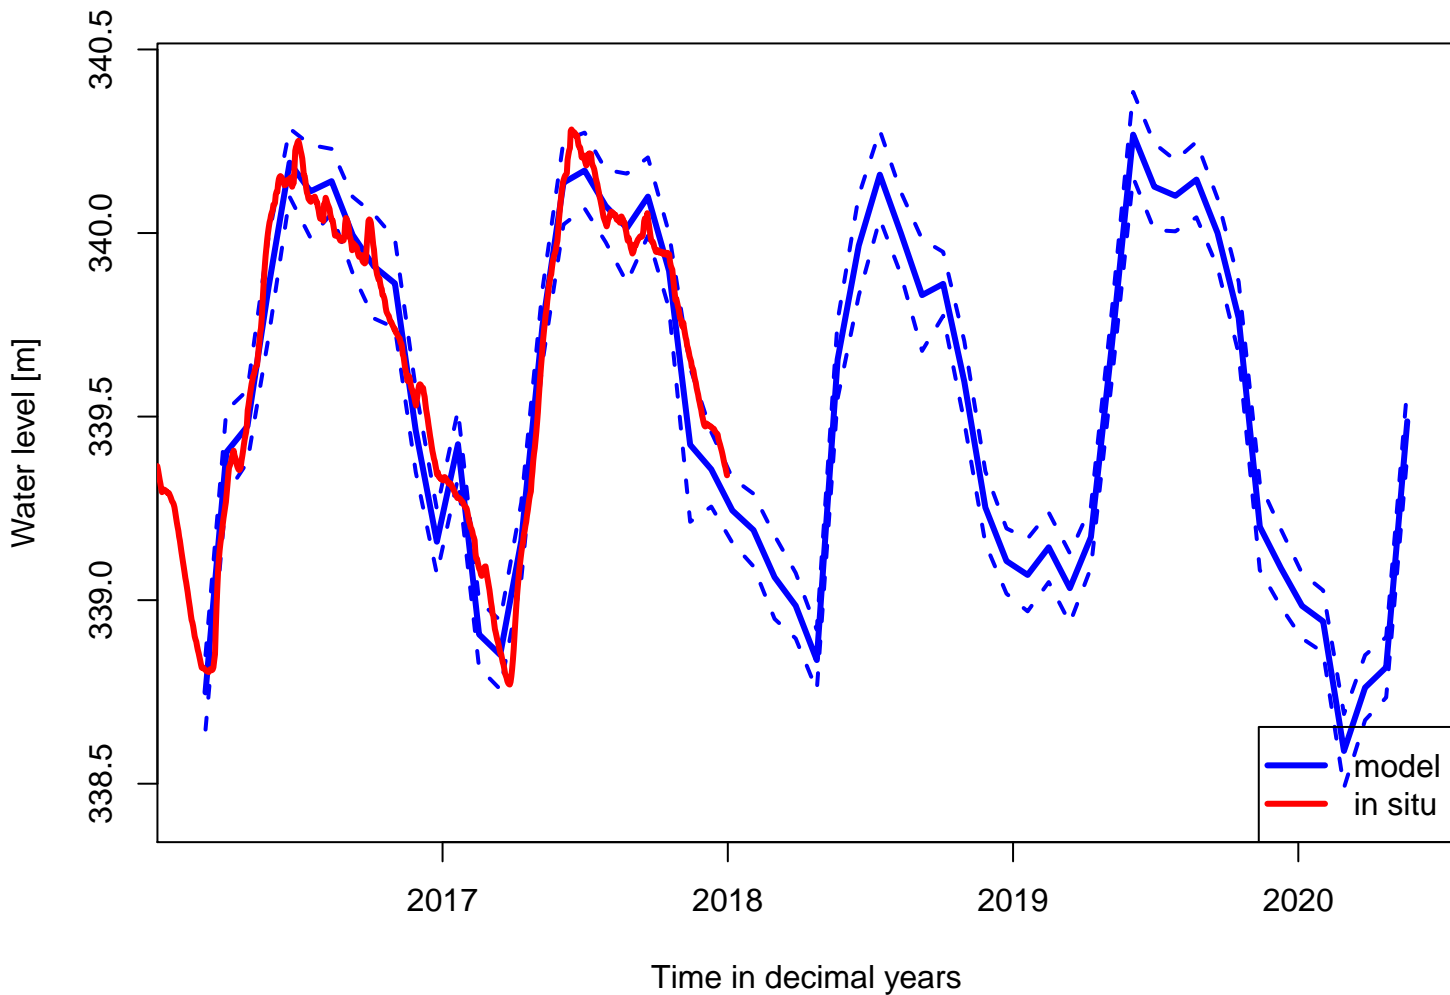

Supplement: s1 [file s1]

**lakename: Texarkana Lake lakeid: 9434 lat: 33.3 lon: -94.16**

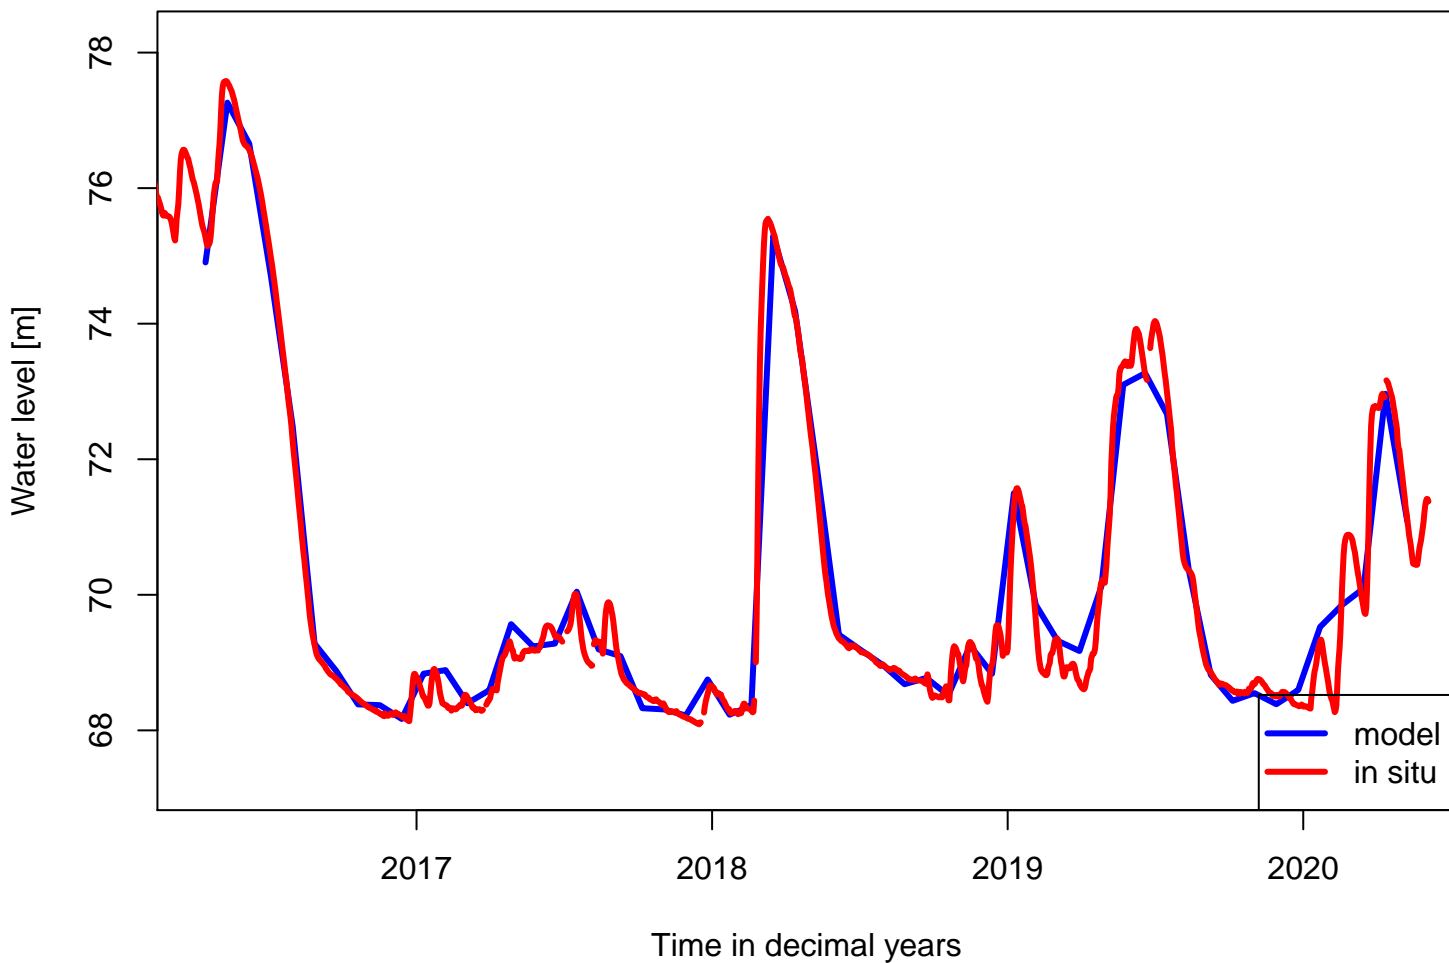

Supplement: s1 [file s1]

**lakename: Choke Canyon lakeid: 9605 lat: 28.48 lon: -98.25**

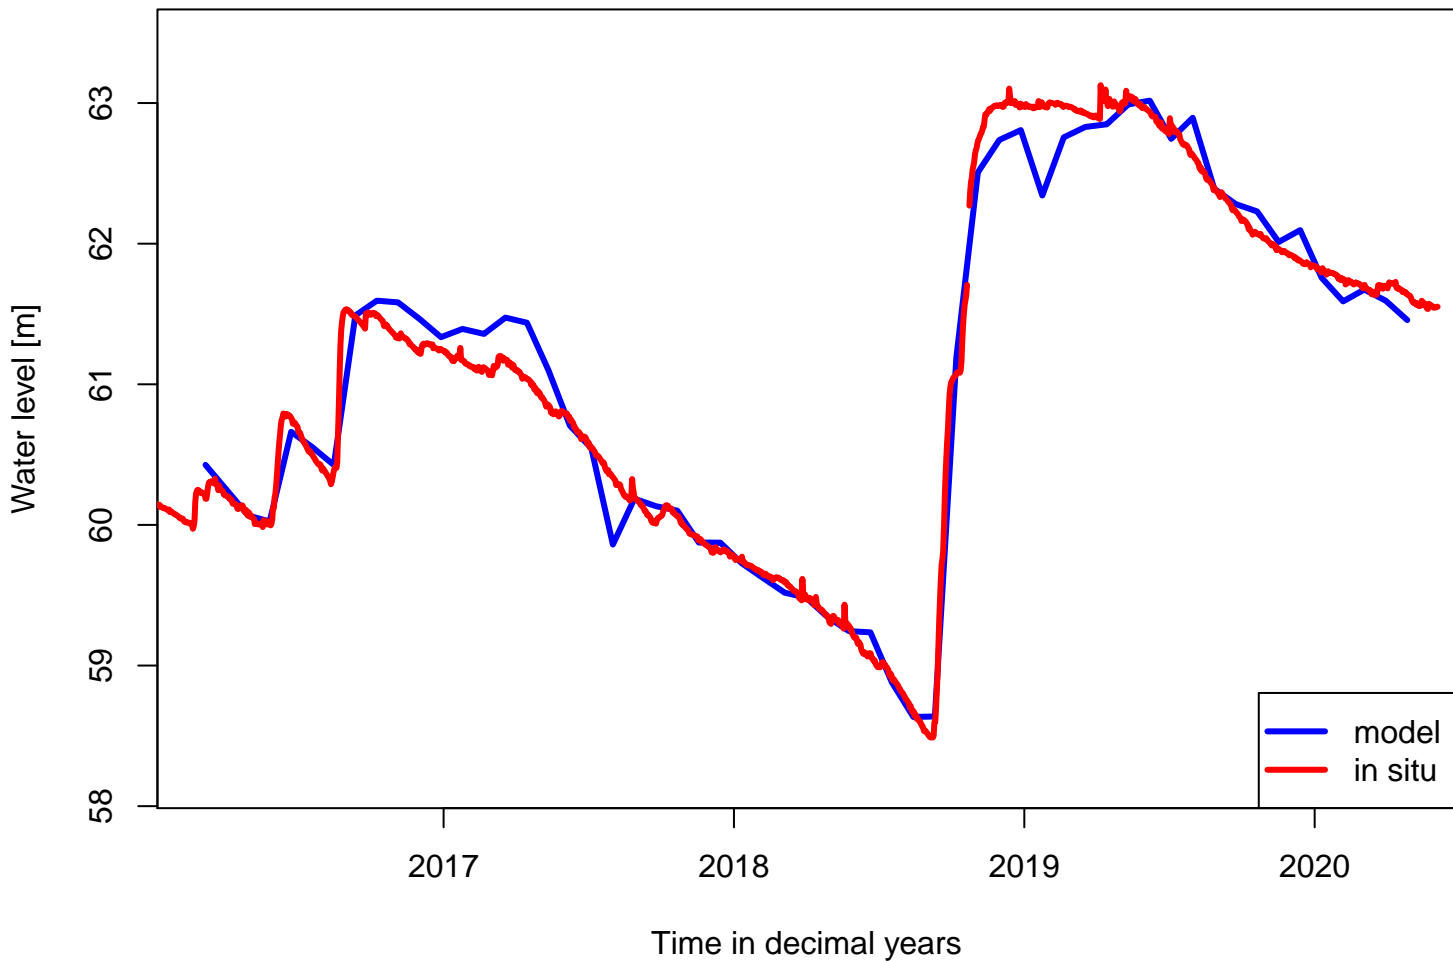

Supplement: s1 [file s1]

**lakename: Saint Clair lakeid: 66 lat: 42.3 lon: -82.71**

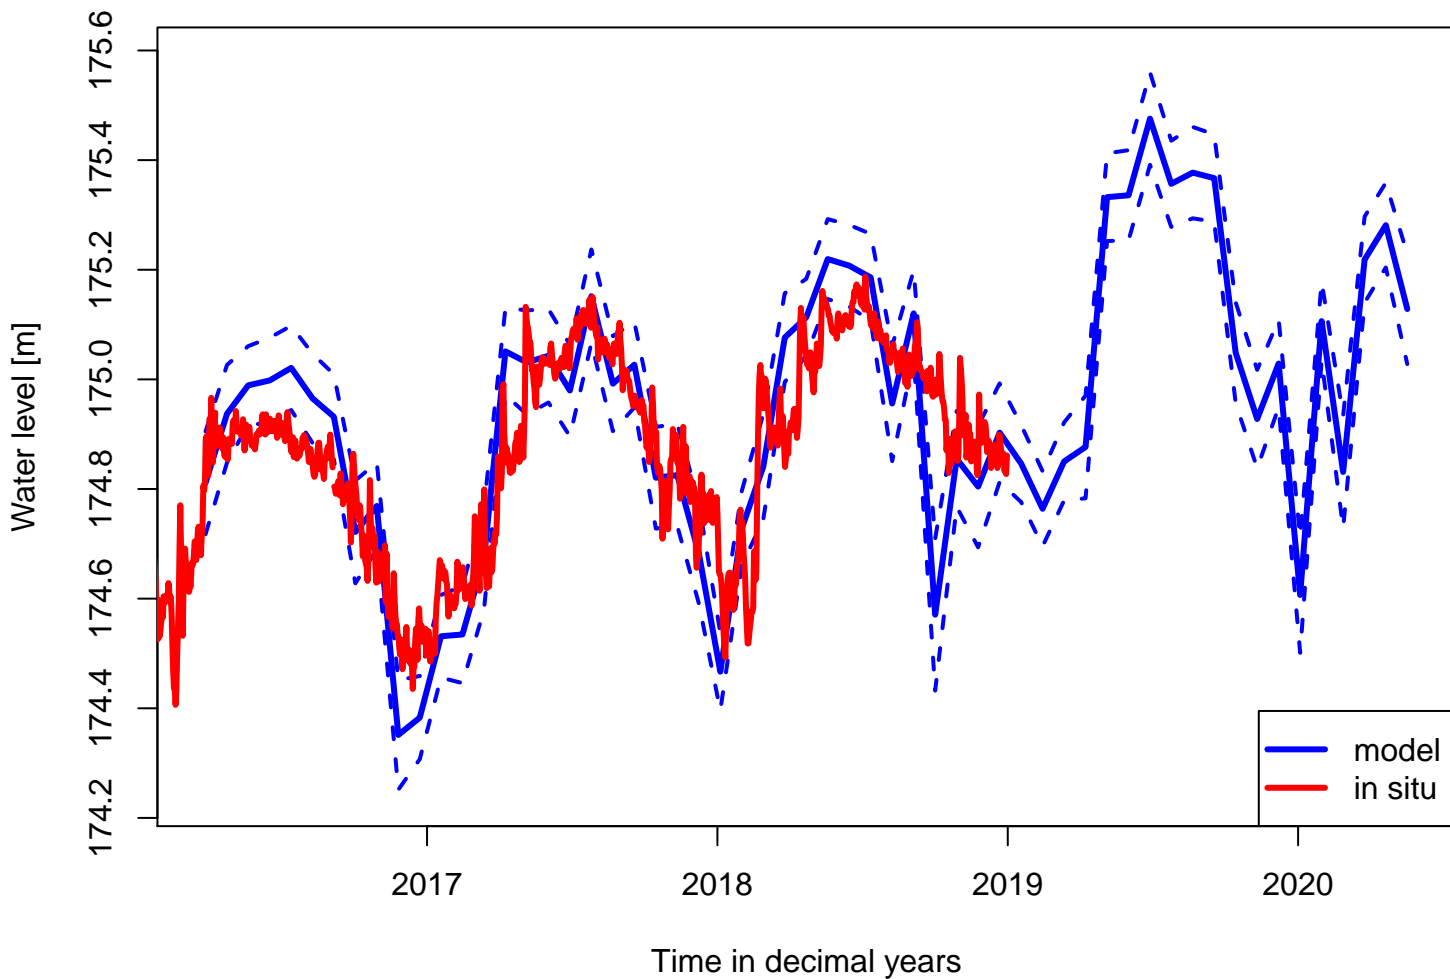

Supplement: s1 [file s1]

**lakename: Lake Moultrie lakeid: 830 lat: 33.4 lon: -80**

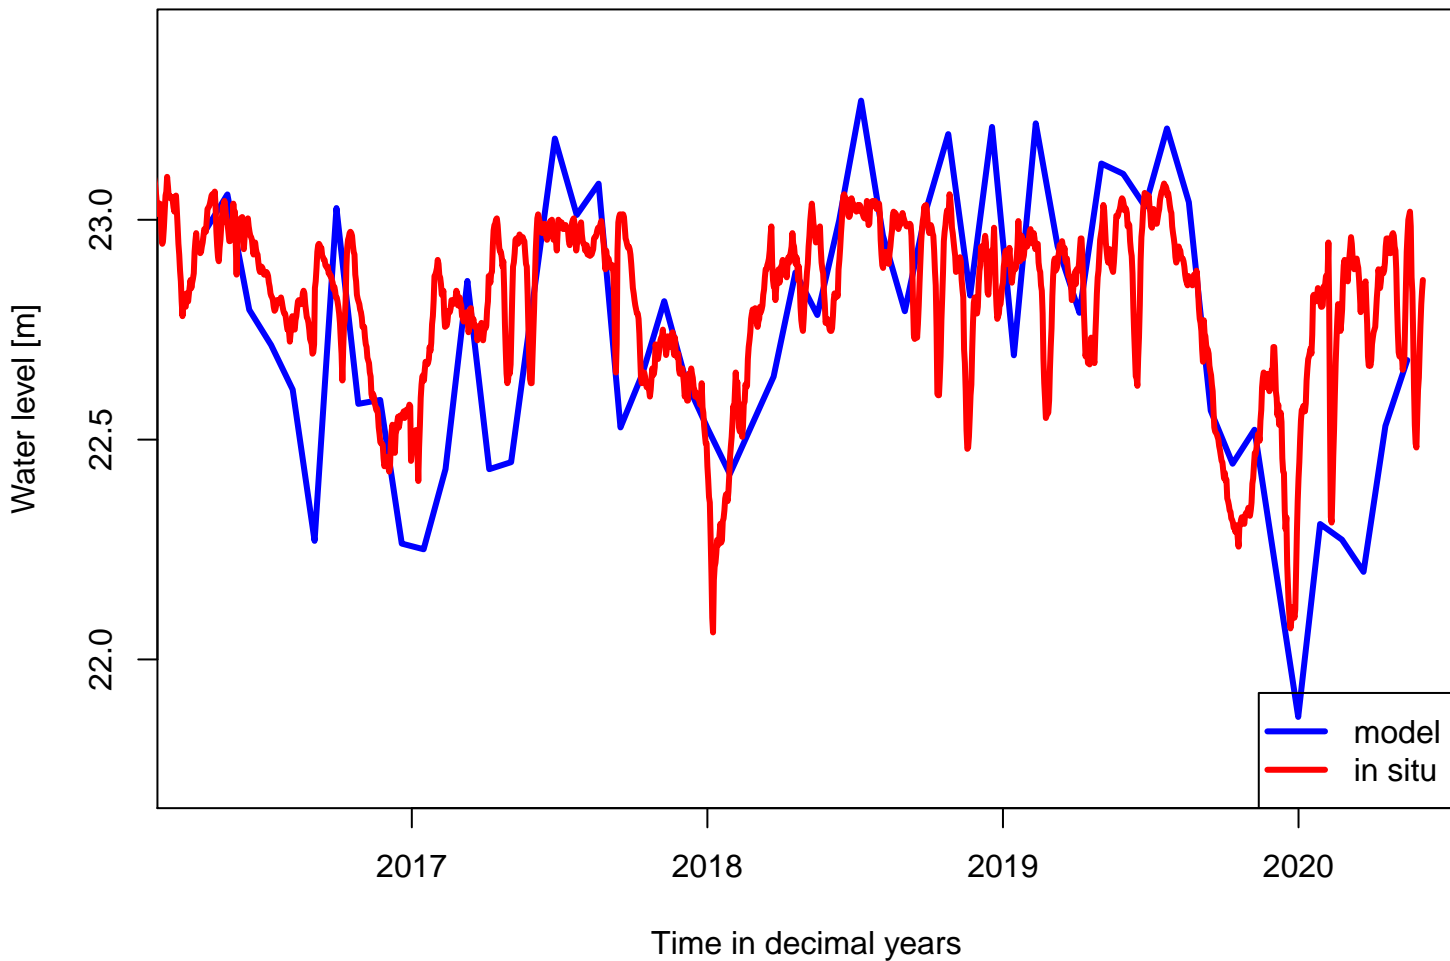

Supplement: s1 [file s1]

**lakename: Mille Lacs lakeid: 746 lat: 46.11 lon: -93.62**

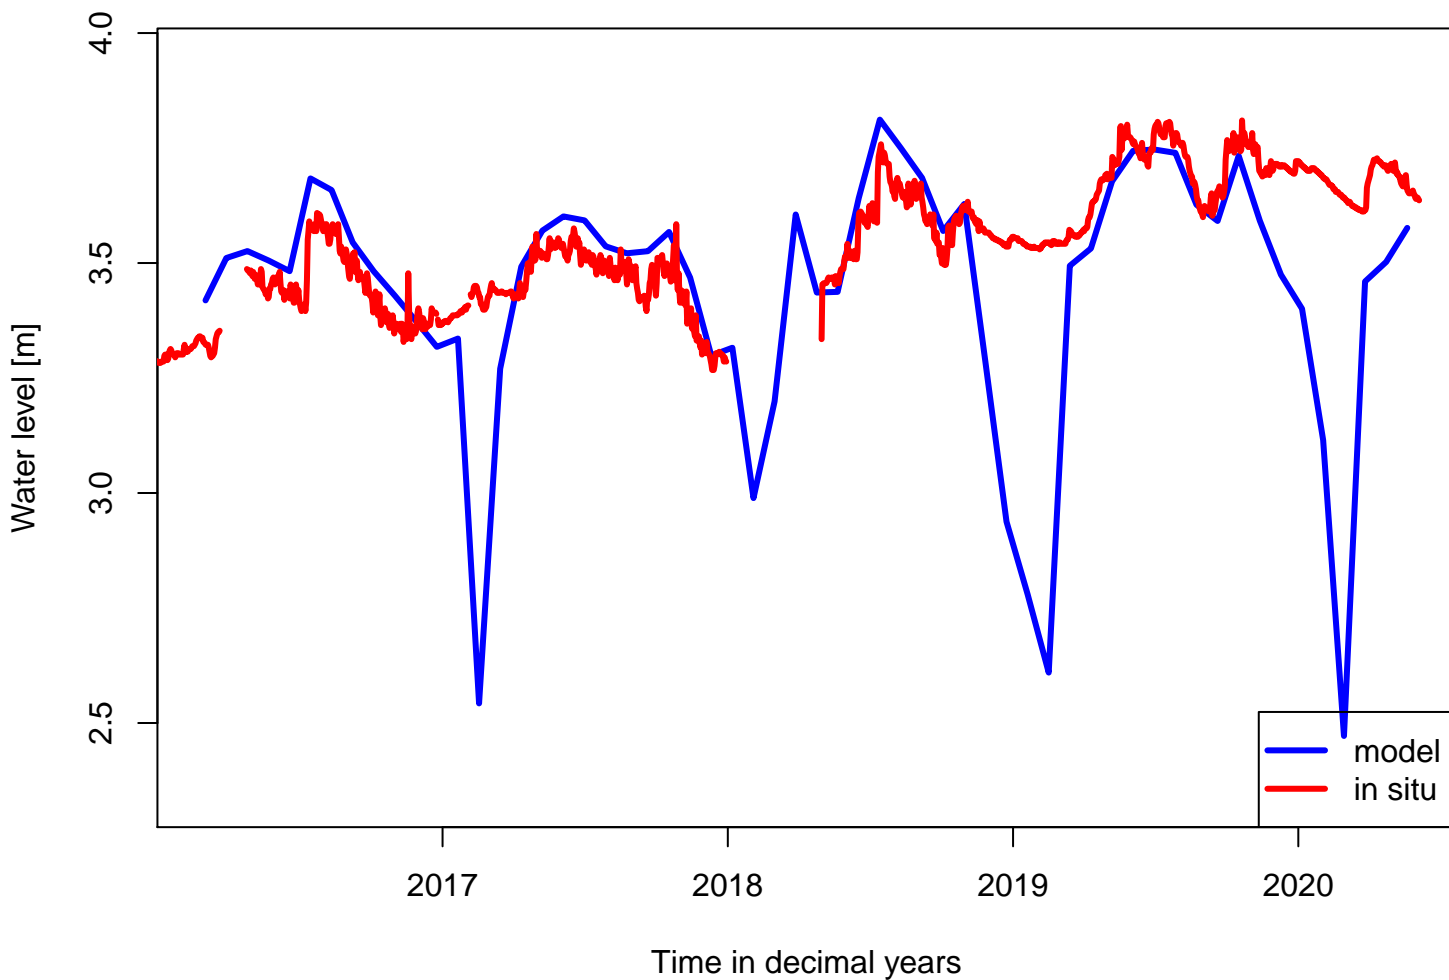

Supplement: s1 [file s1]

**lakename: Dauphin lakeid: 641 lat: 51.44 lon: -99.95**

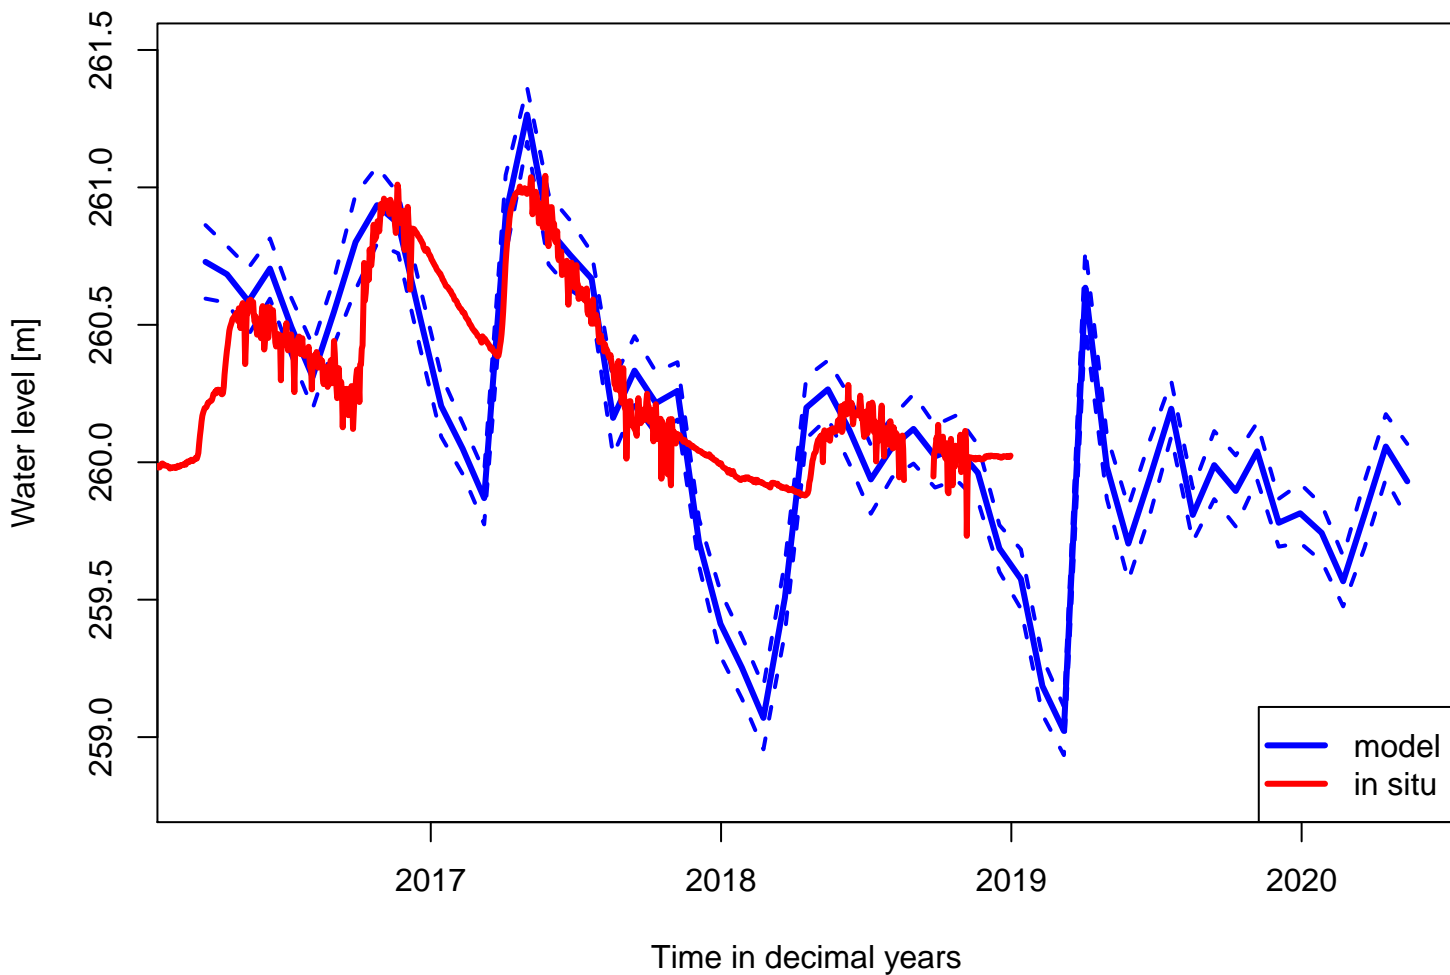

Supplement: s1 [file s1]

**lakename: Pontchartrain lakeid: 68 lat: 30.2 lon: -90.12**

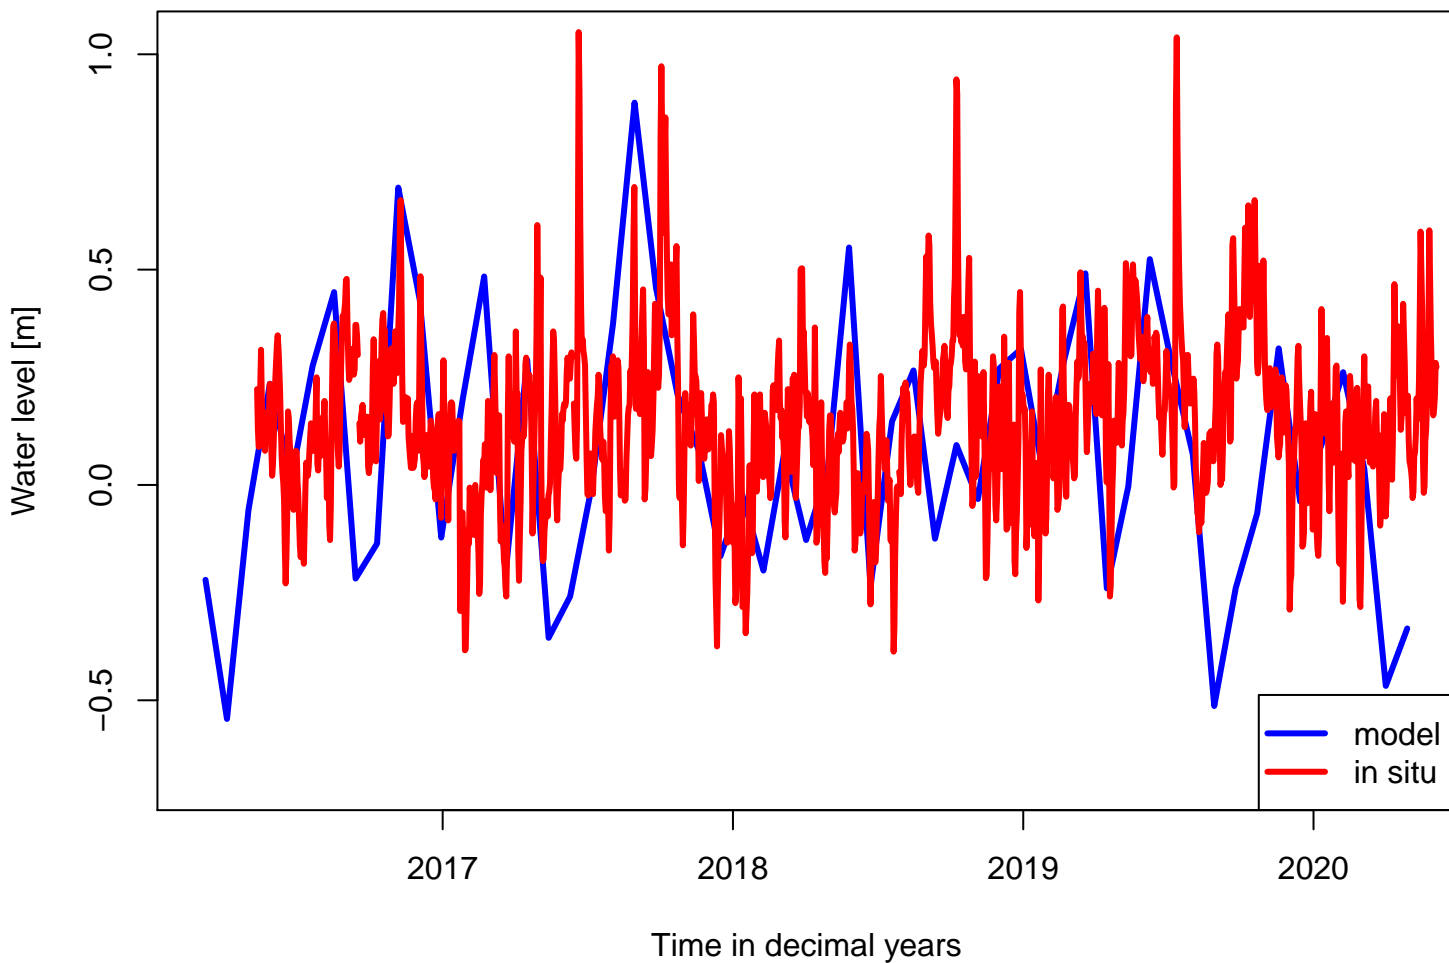

Supplement: s1 [file s1]

**lakename: Wollaston lakeid: 32 lat: 58.48 lon: -103.3**

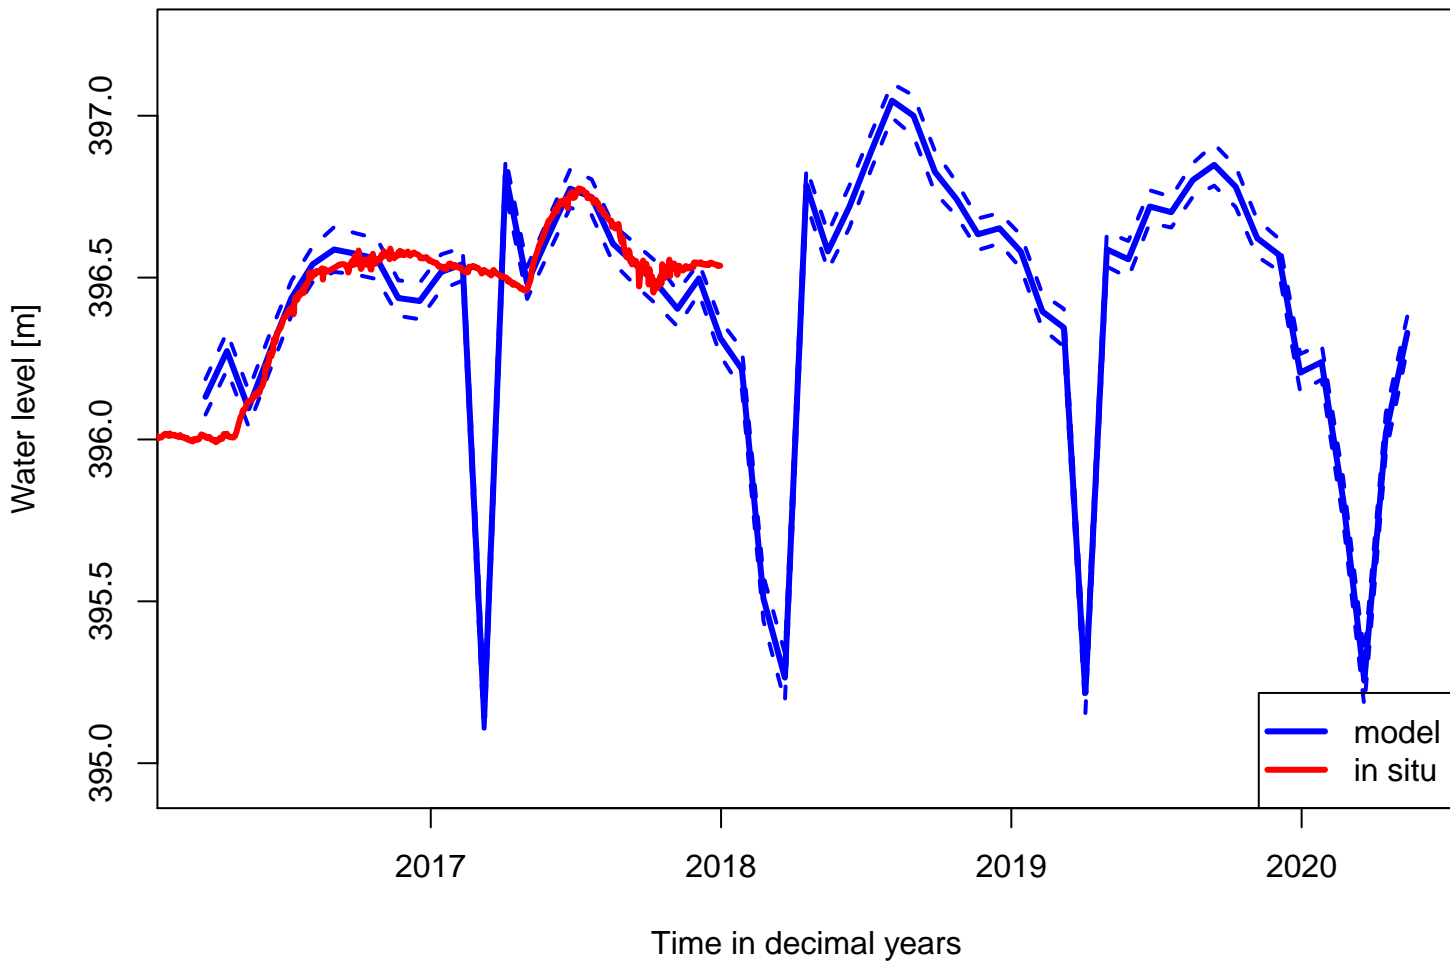

Supplement: s1 [file s1]

**lakename: Melville lakeid: 50 lat: 53.59 lon: -59.48**

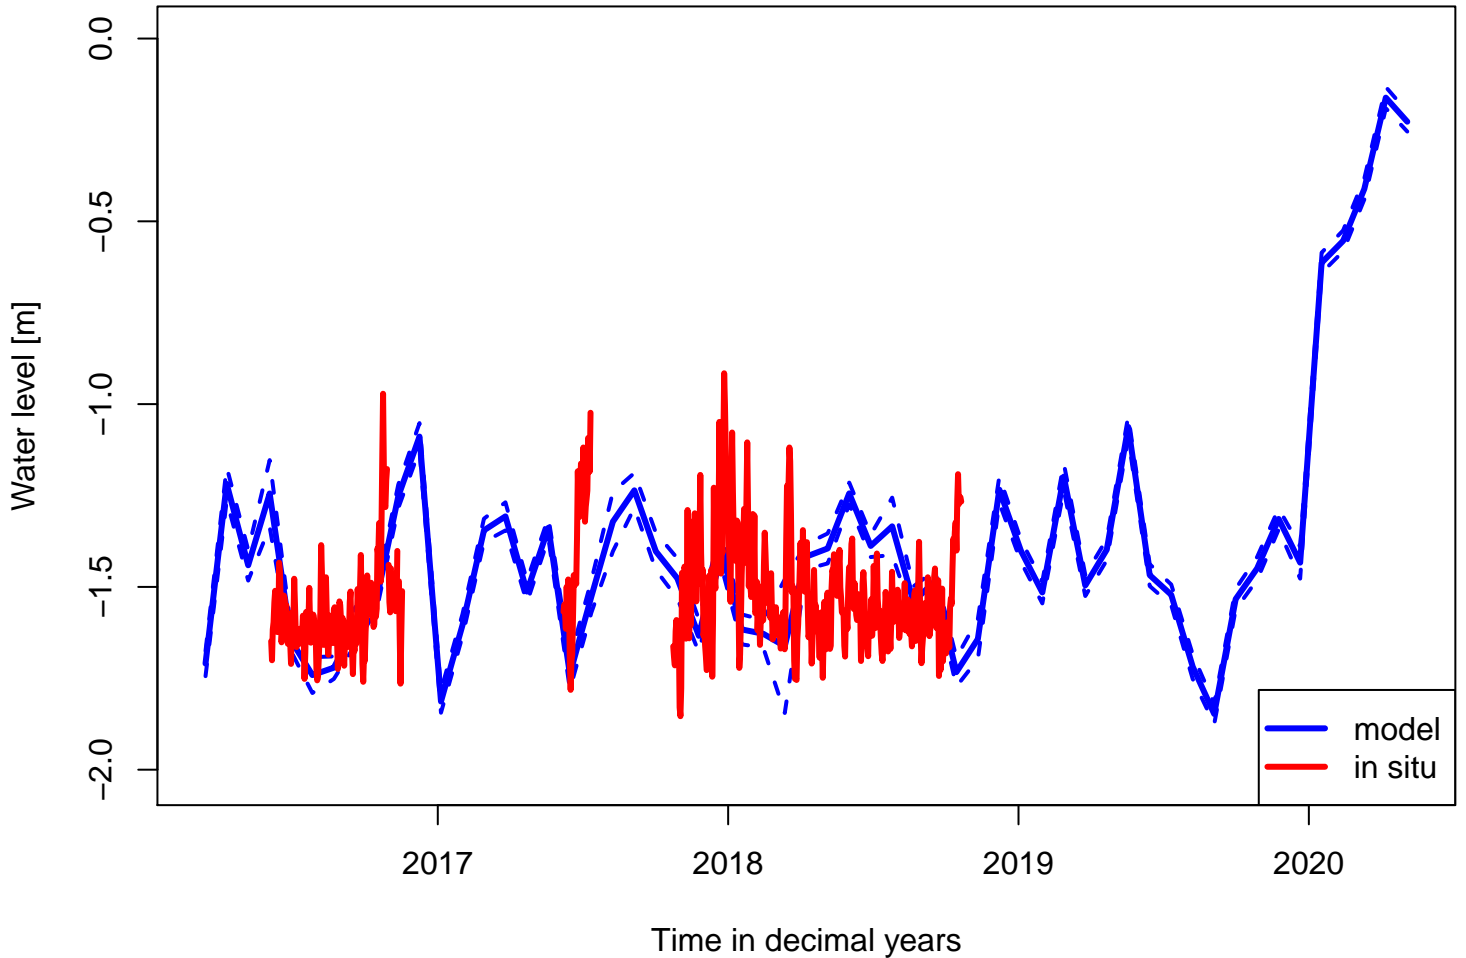

Supplement: s1 [file s1]

**lakename: Lesser Slave lakeid: 42 lat: 55.31 lon: -114.8**

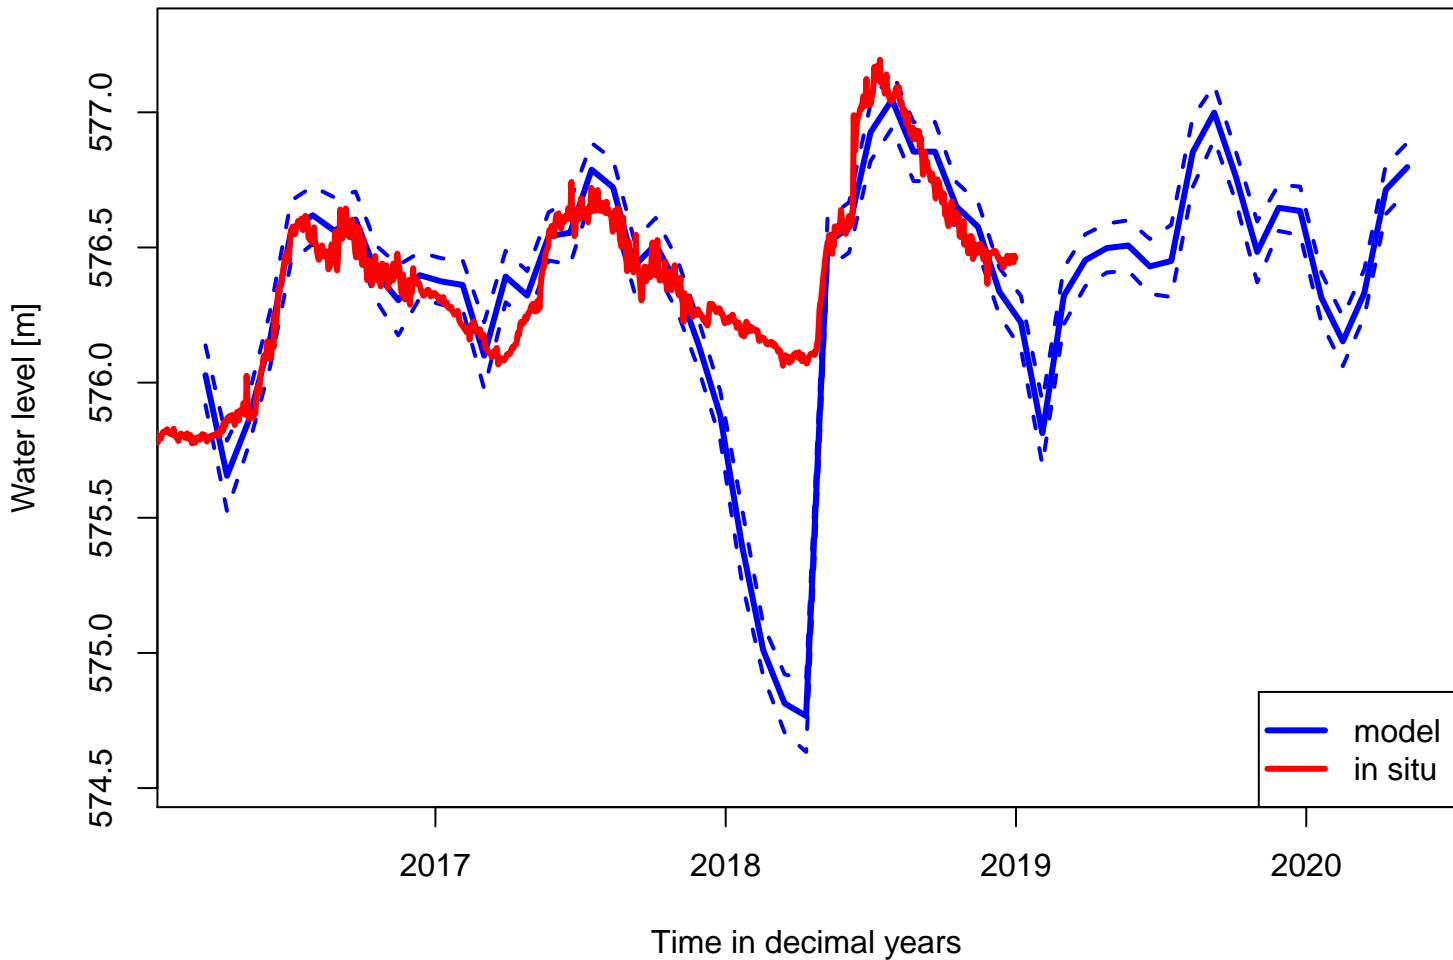

Supplement: s1 [file s1]

**lakename: Nechako Reservoir lakeid: 591 lat: 53.65 lon: -127.5**

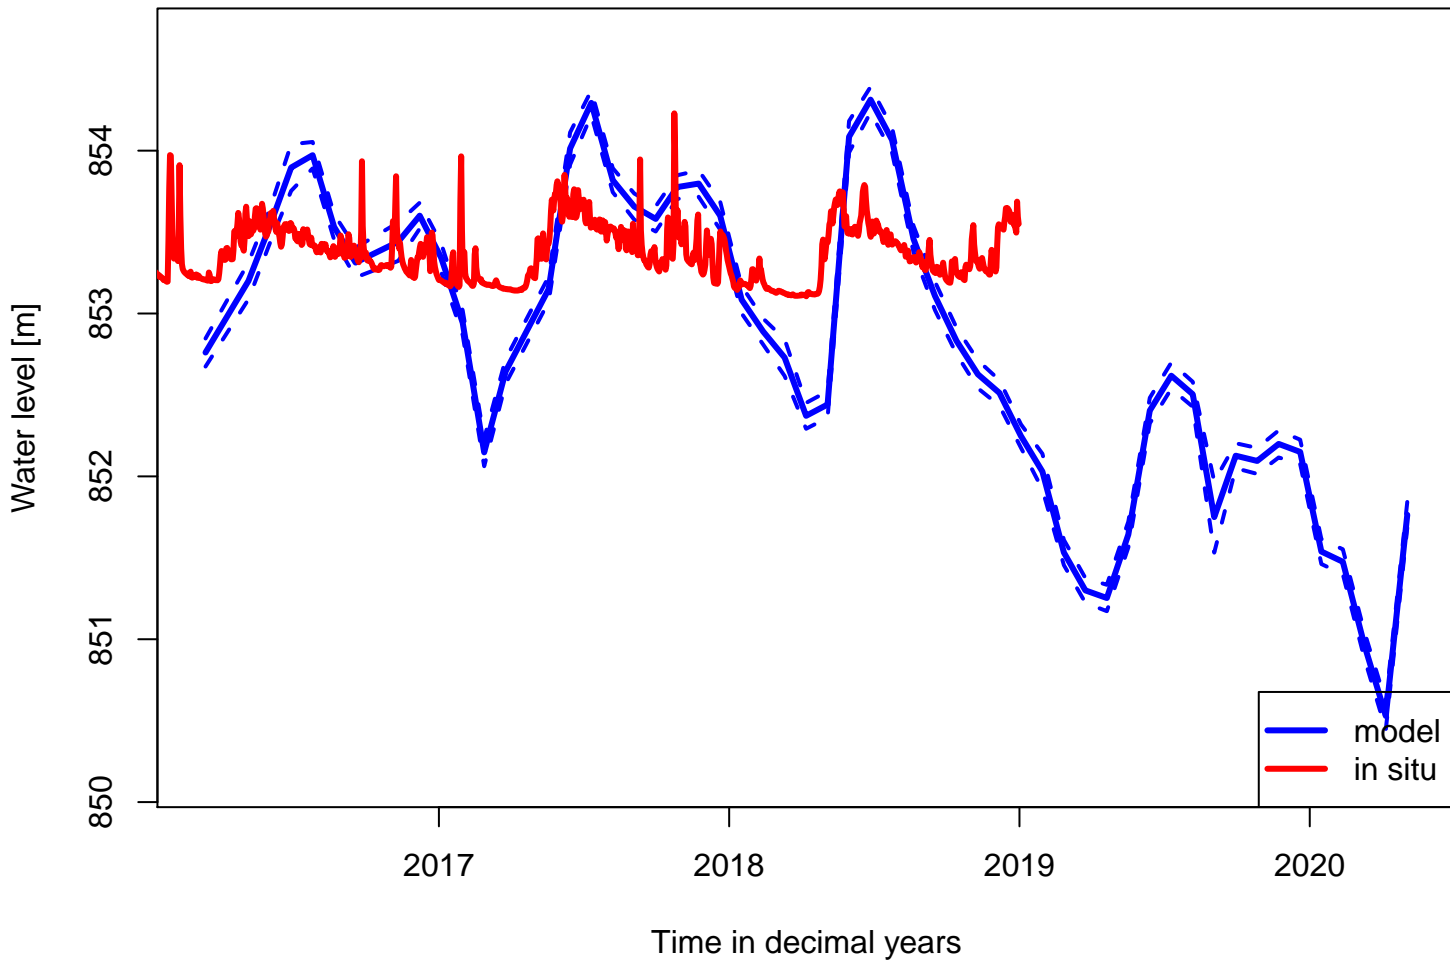

Supplement: s1 [file s1]

**lakename: Melville lakeid: 50 lat: 53.59 lon: -59.48**

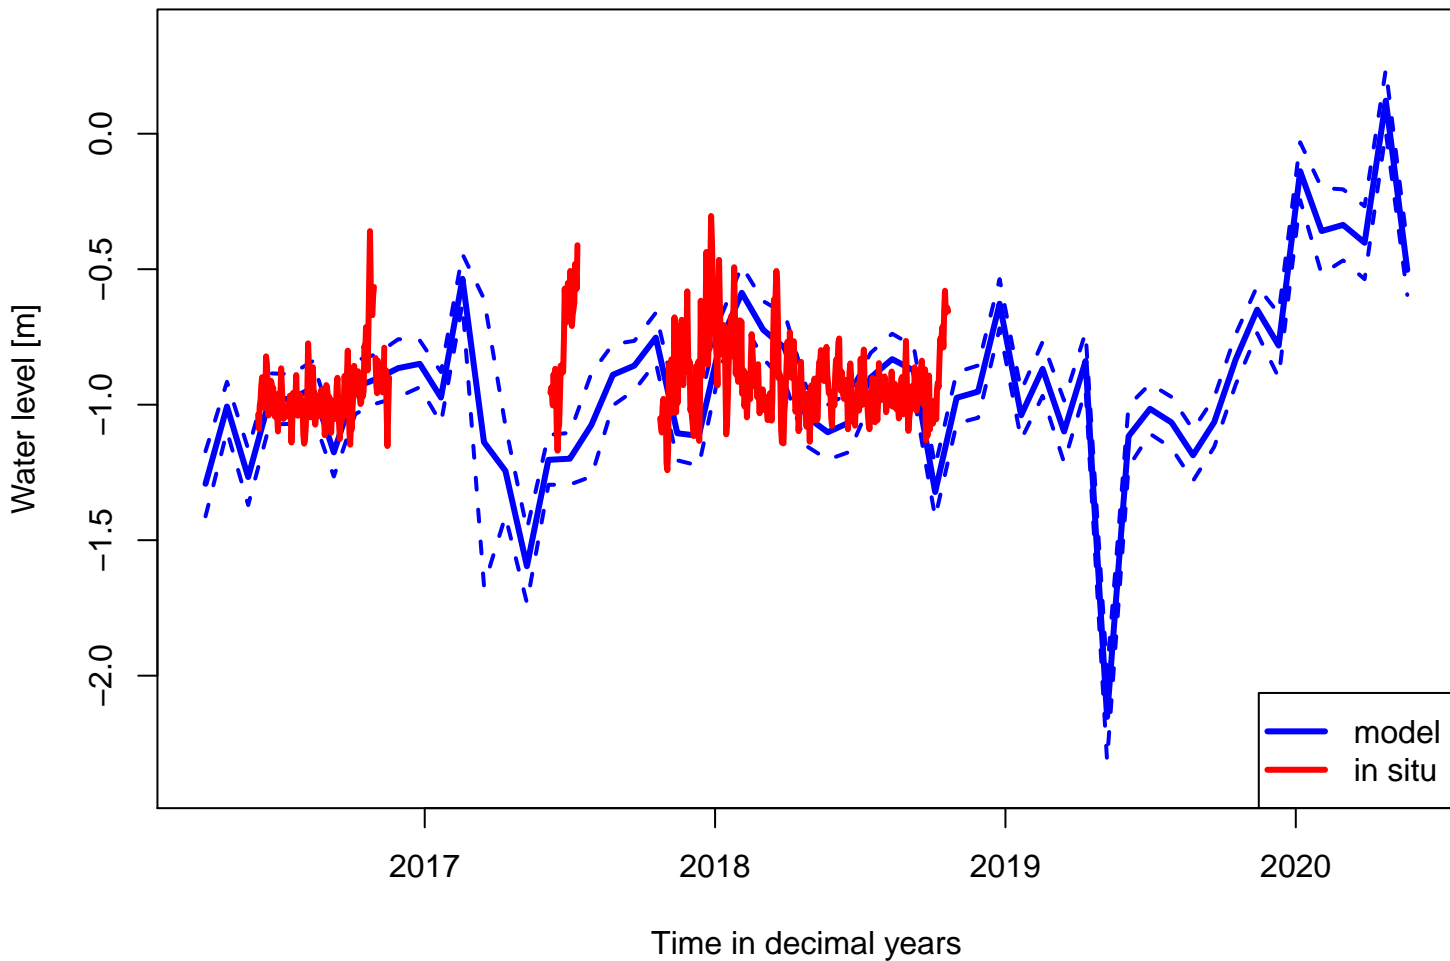

Supplement: s1 [file s1]

**lakename: Lake Havasu lakeid: 9392 lat: 34.32 lon: -114.2**

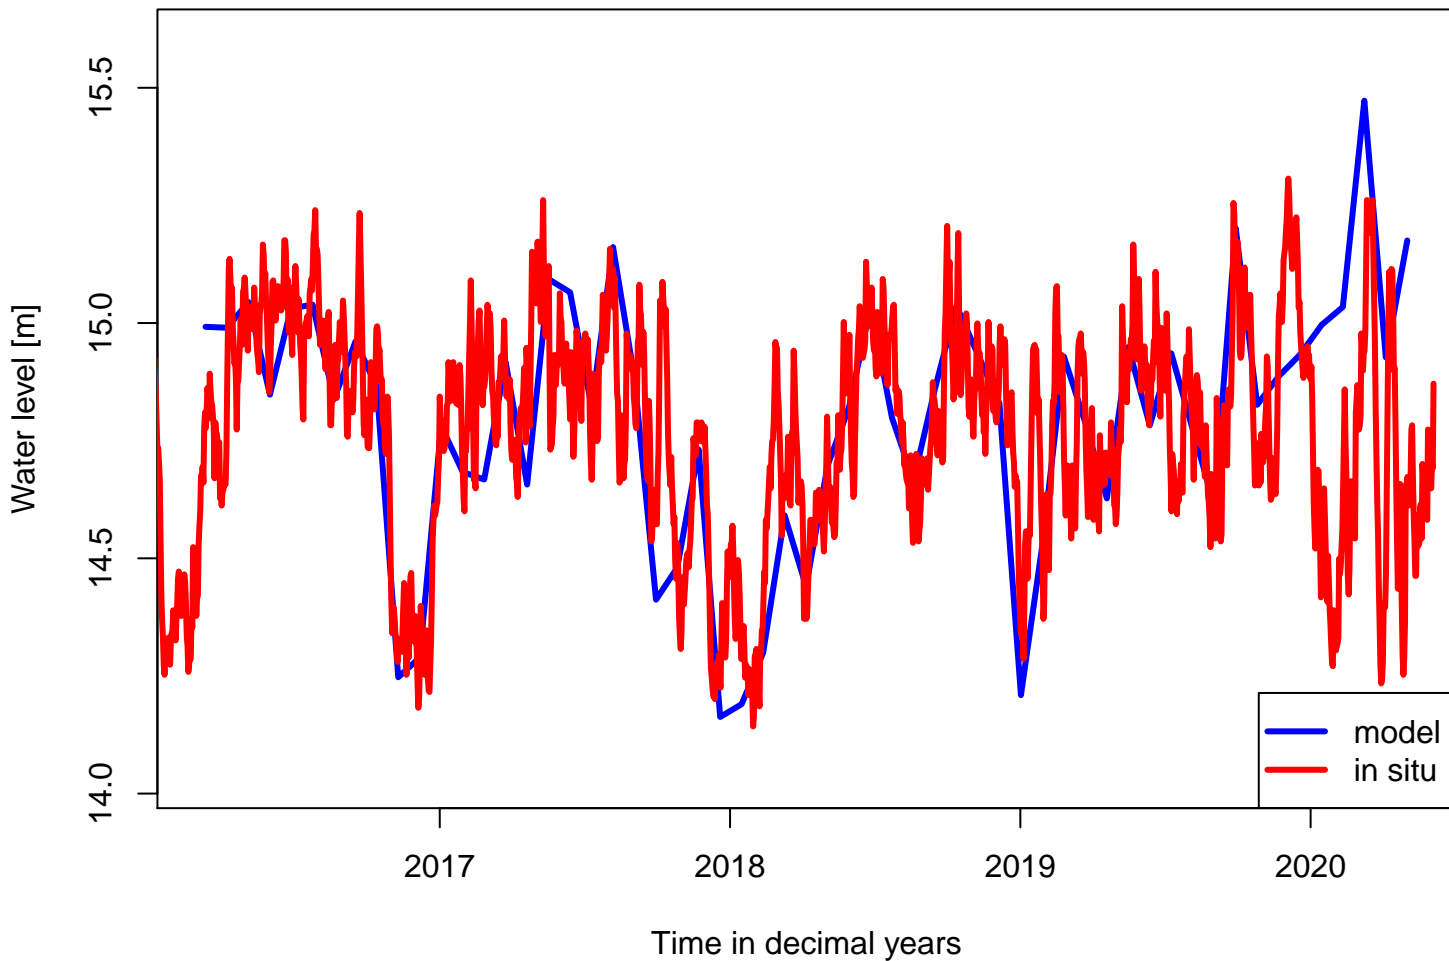

Supplement: s1 [file s1]

**lakename: Lake Whitney lakeid: 9492 lat: 31.87 lon: -97.37**

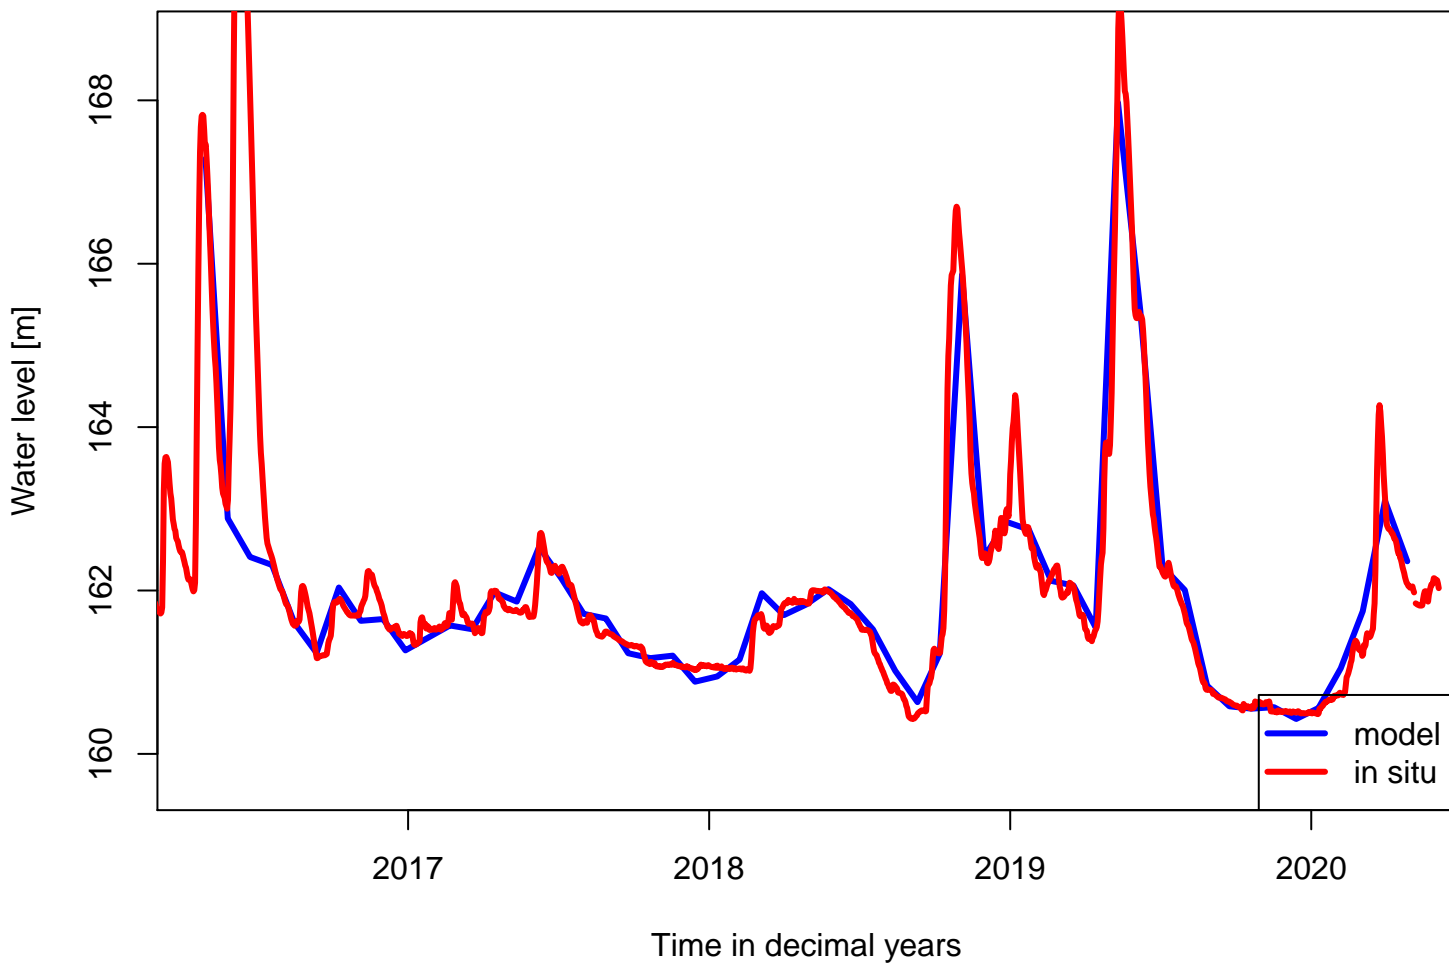

Supplement: s1 [file s1]

**lakename: lakeid: 749 lat: 45.82 lon: -77.13**

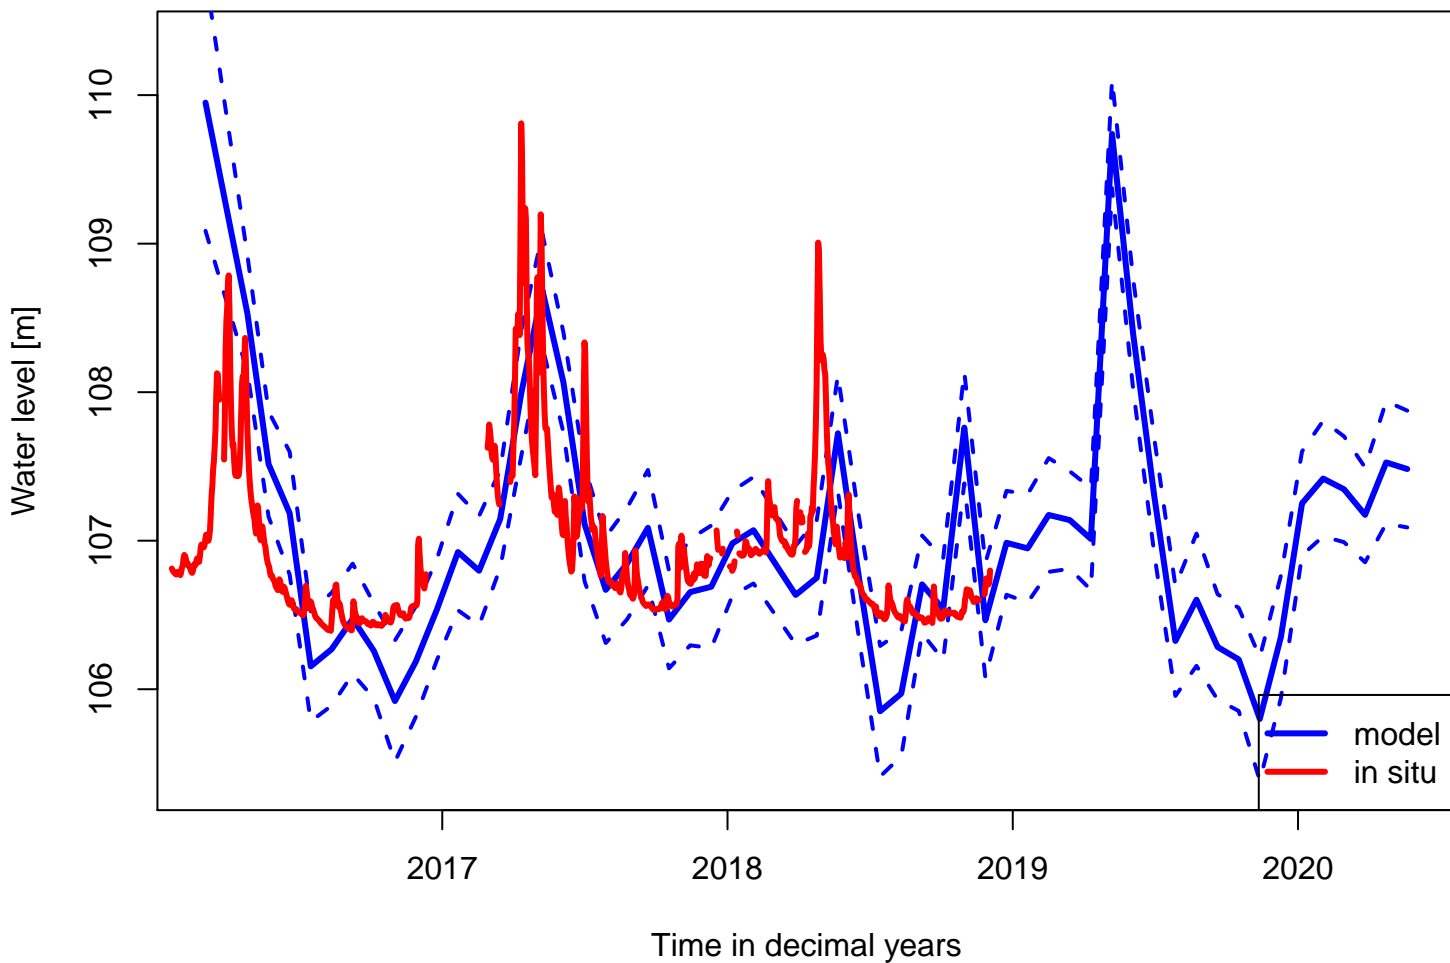

Supplement: s1 [file s1]

**lakename: lakeid: 306 lat: 63.65 lon: -95.85**

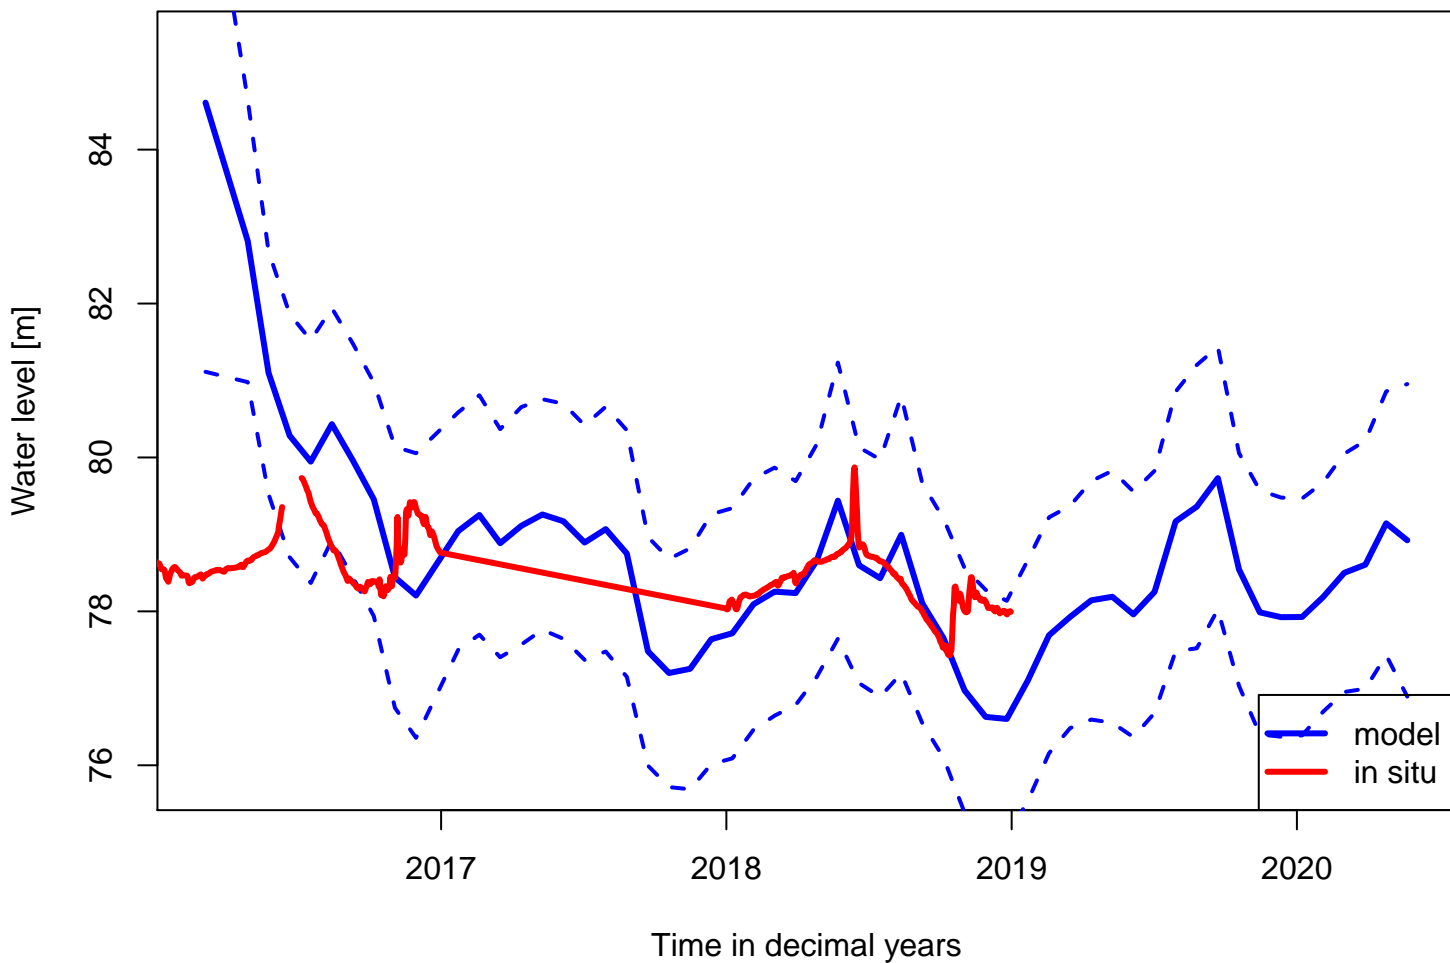

Supplement: s1 [file s1]

**lakename: lakeid: 8822 lat: 45.57 lon: -67.43**

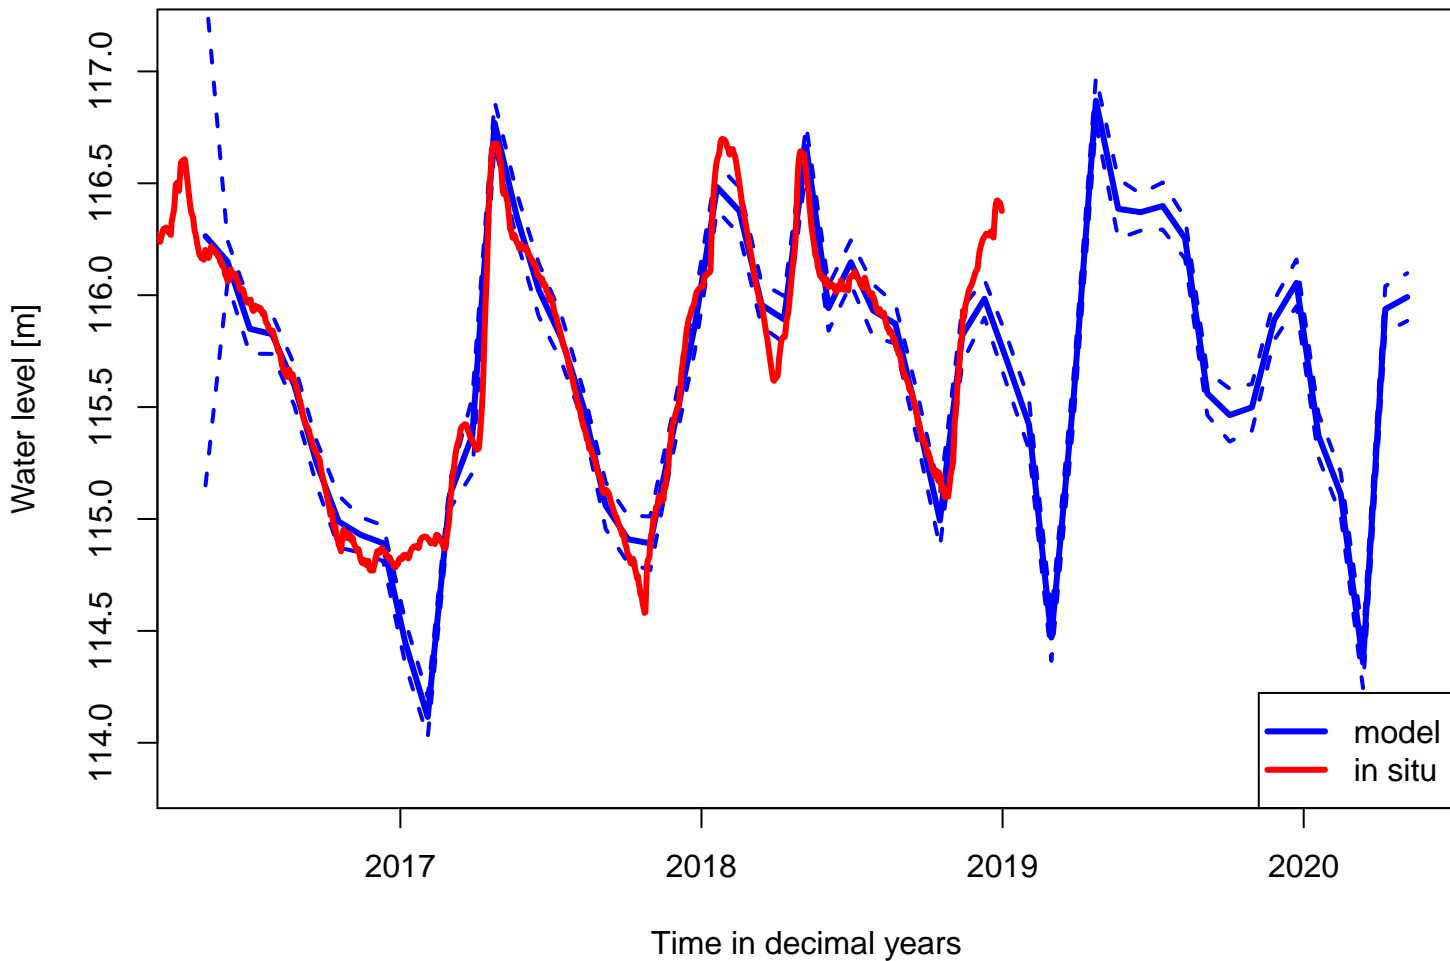

Supplement: s1 [file s1]

**lakename: lakeid: 6545 lat: 54.16 lon: -110.7**

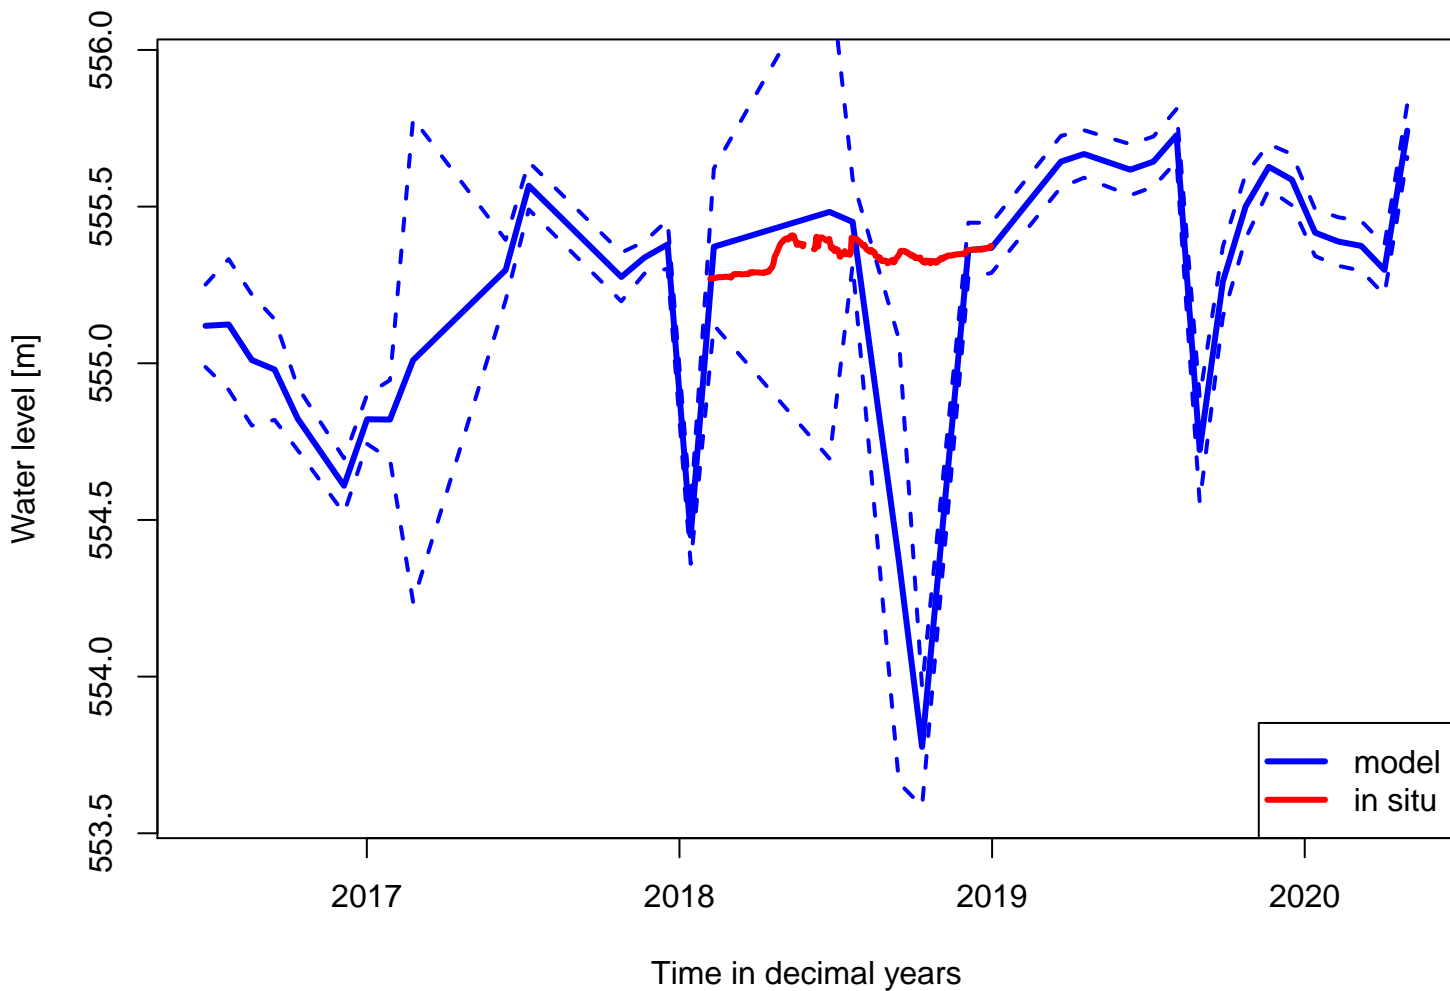

Supplement: s1 [file s1]

**lakename: Winnipegosis lakeid: 52 lat: 52.97 lon: -101**

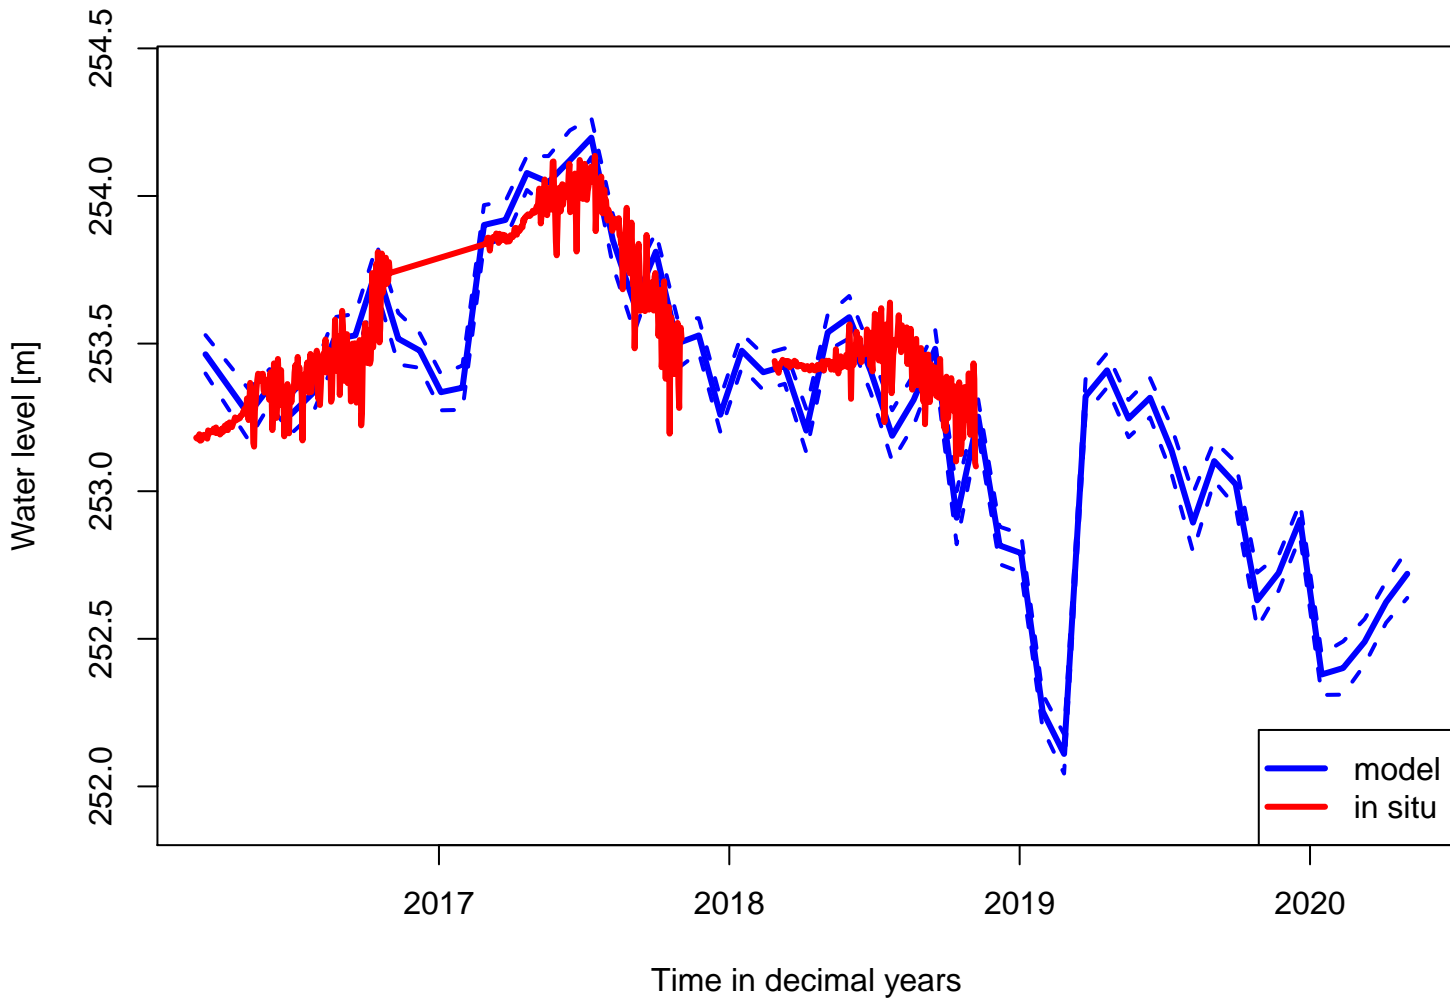

Supplement: s1 [file s1]

**lakename: Wollaston lakeid: 32 lat: 58.48 lon: -103.3**

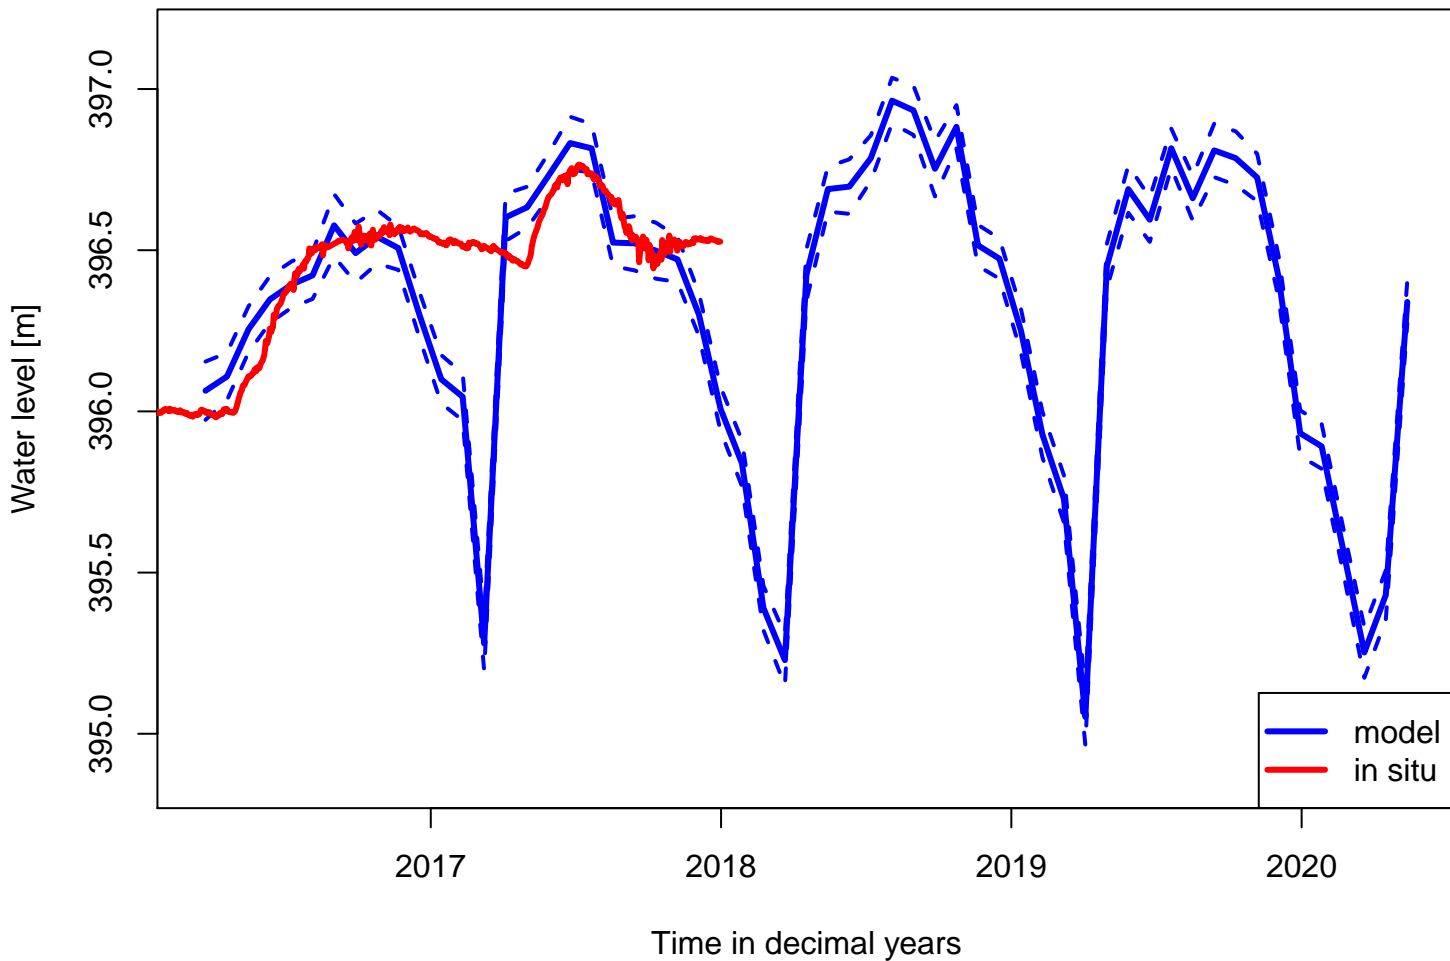

Supplement: s1 [file s1]

**lakename: Split lakeid: 479 lat: 56.24 lon: -96.09**

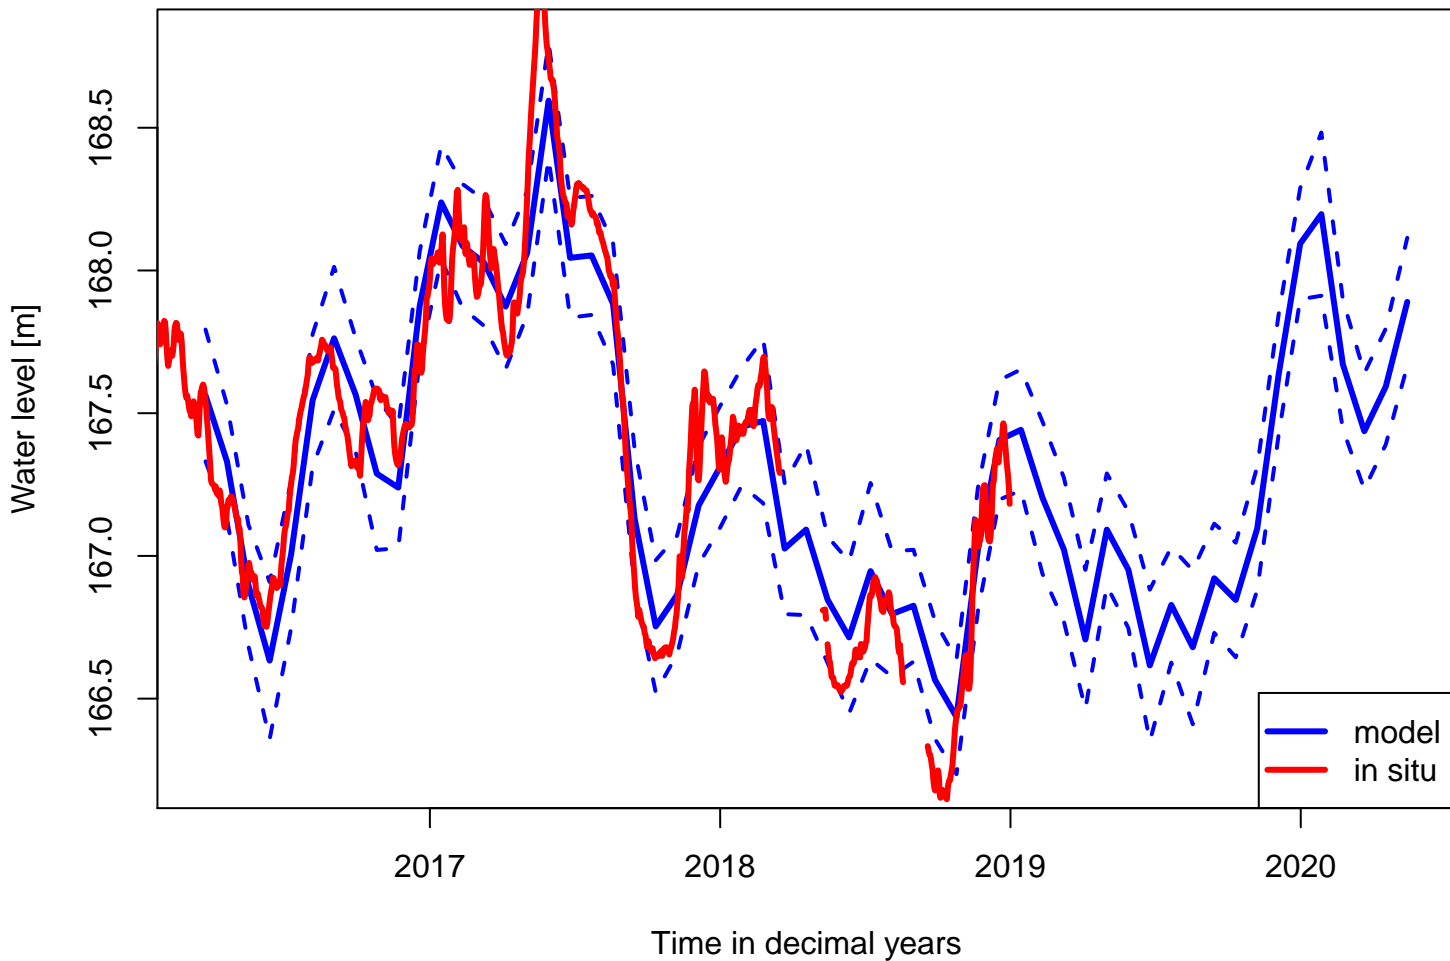

Supplement: s1 [file s1]

**lakename: Woods lakeid: 57 lat: 48.9 lon: -95.32**

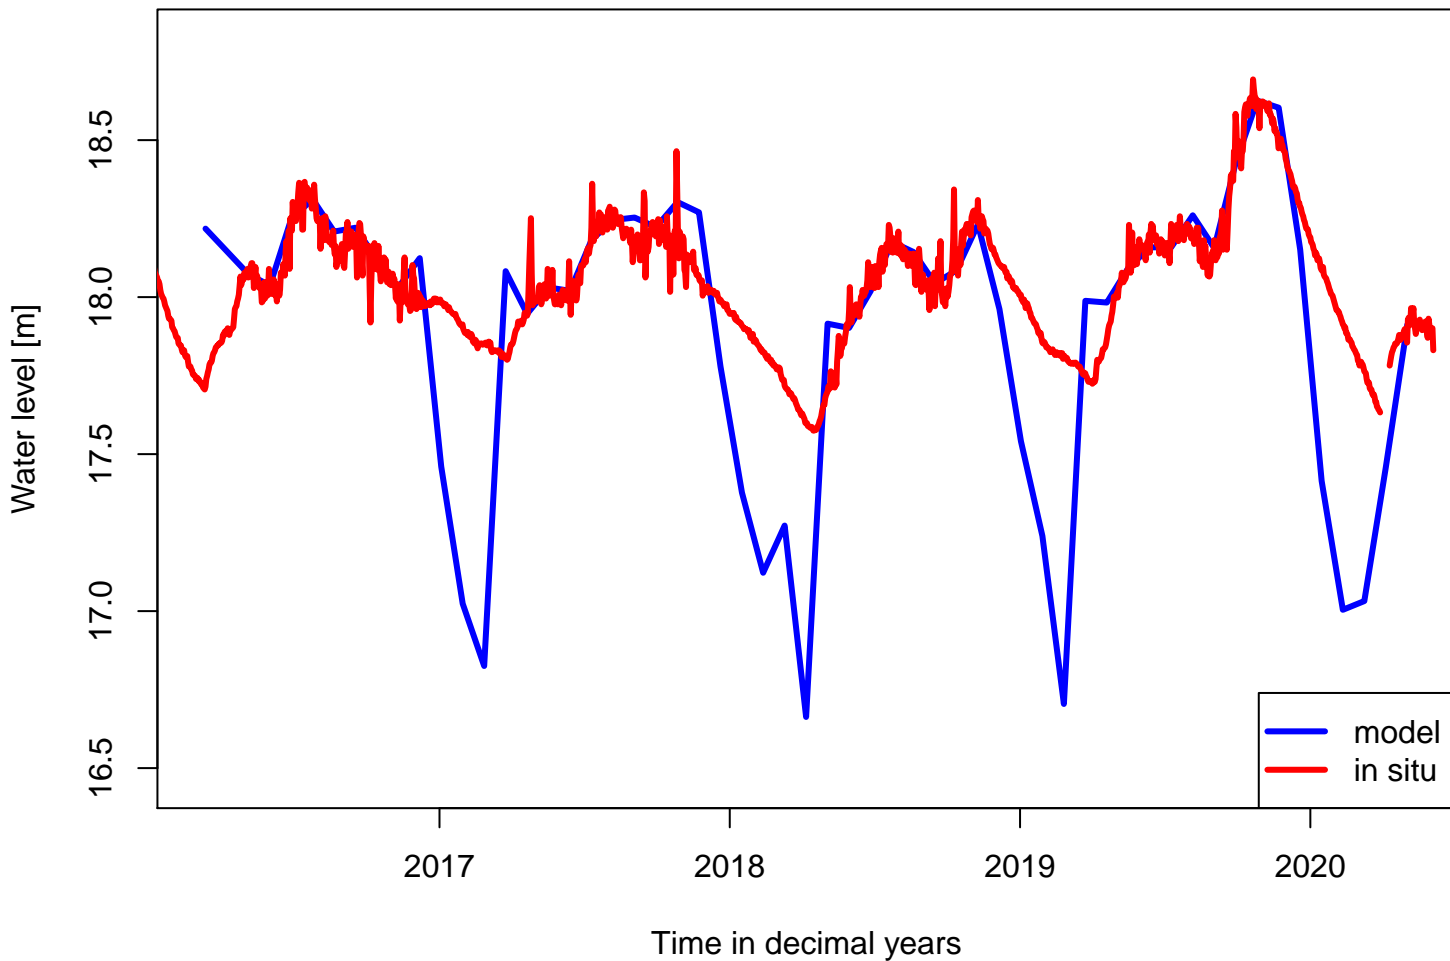

Supplement: s1 [file s1]

**lakename: Okeechobee lakeid: 69 lat: 26.95 lon: -80.83**

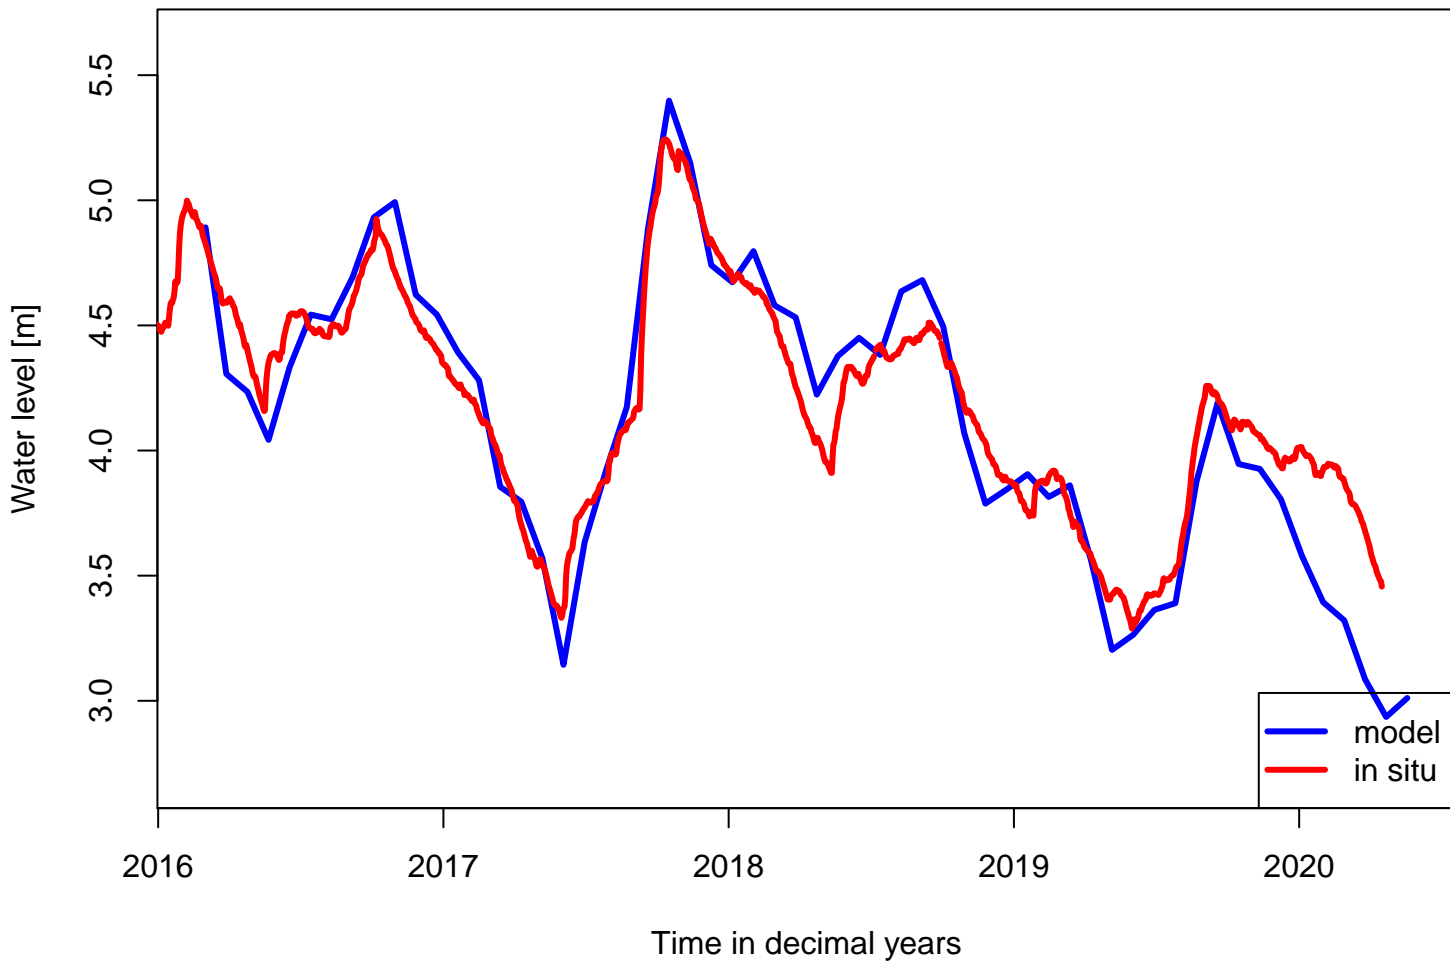

Supplement: s1 [file s1]

**lakename: Reindeer lakeid: 38 lat: 57.88 lon: -101.7**

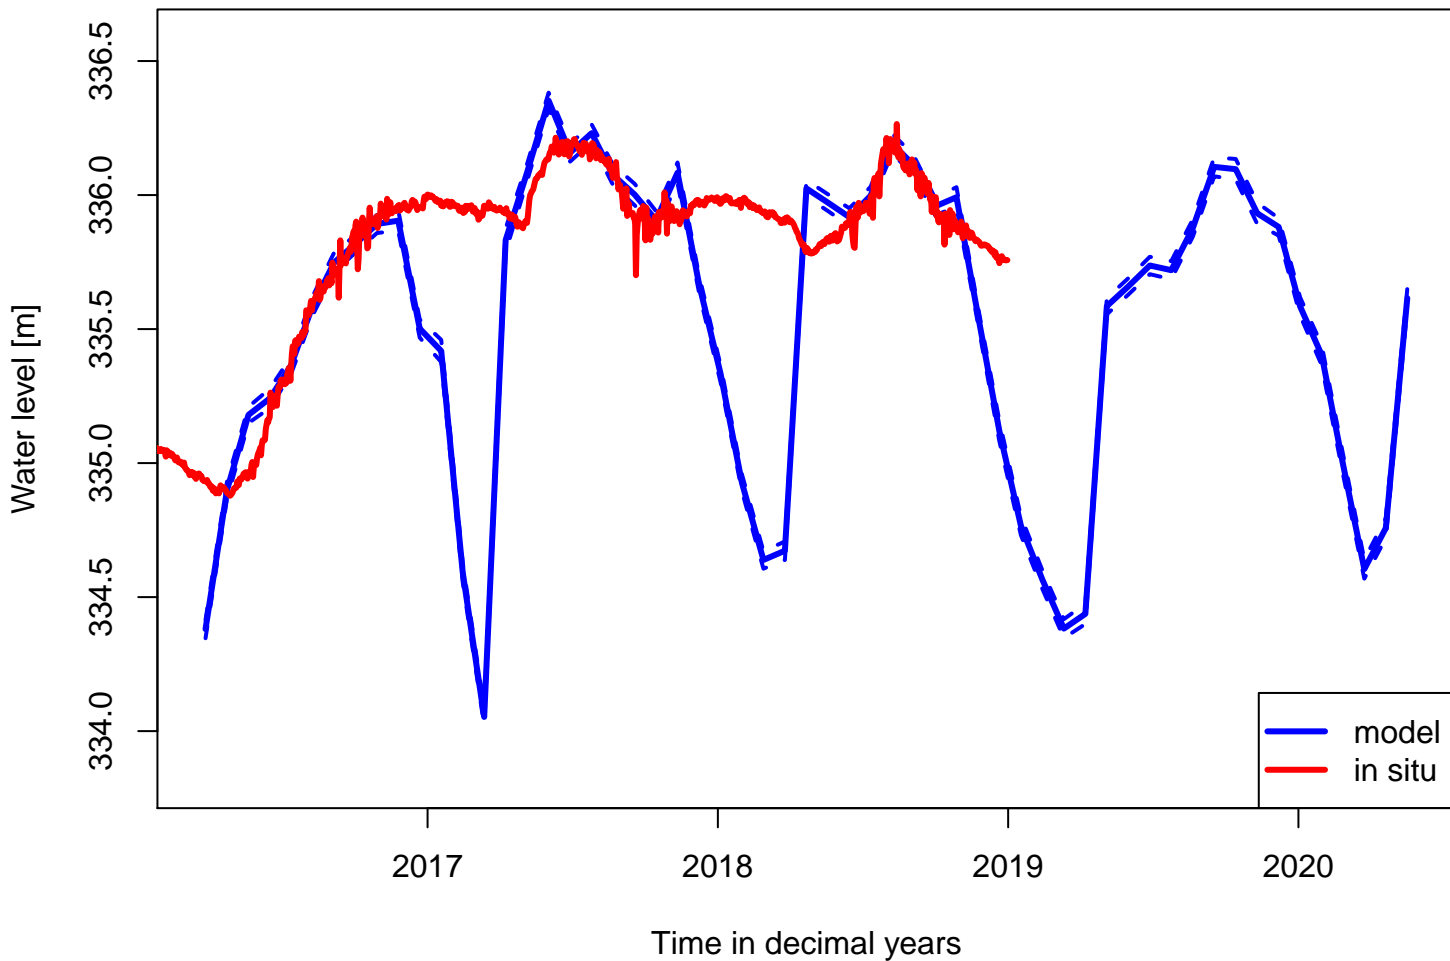

Supplement: s1 [file s1]

**lakename: Tazin lakeid: 412 lat: 59.82 lon: -109.4**

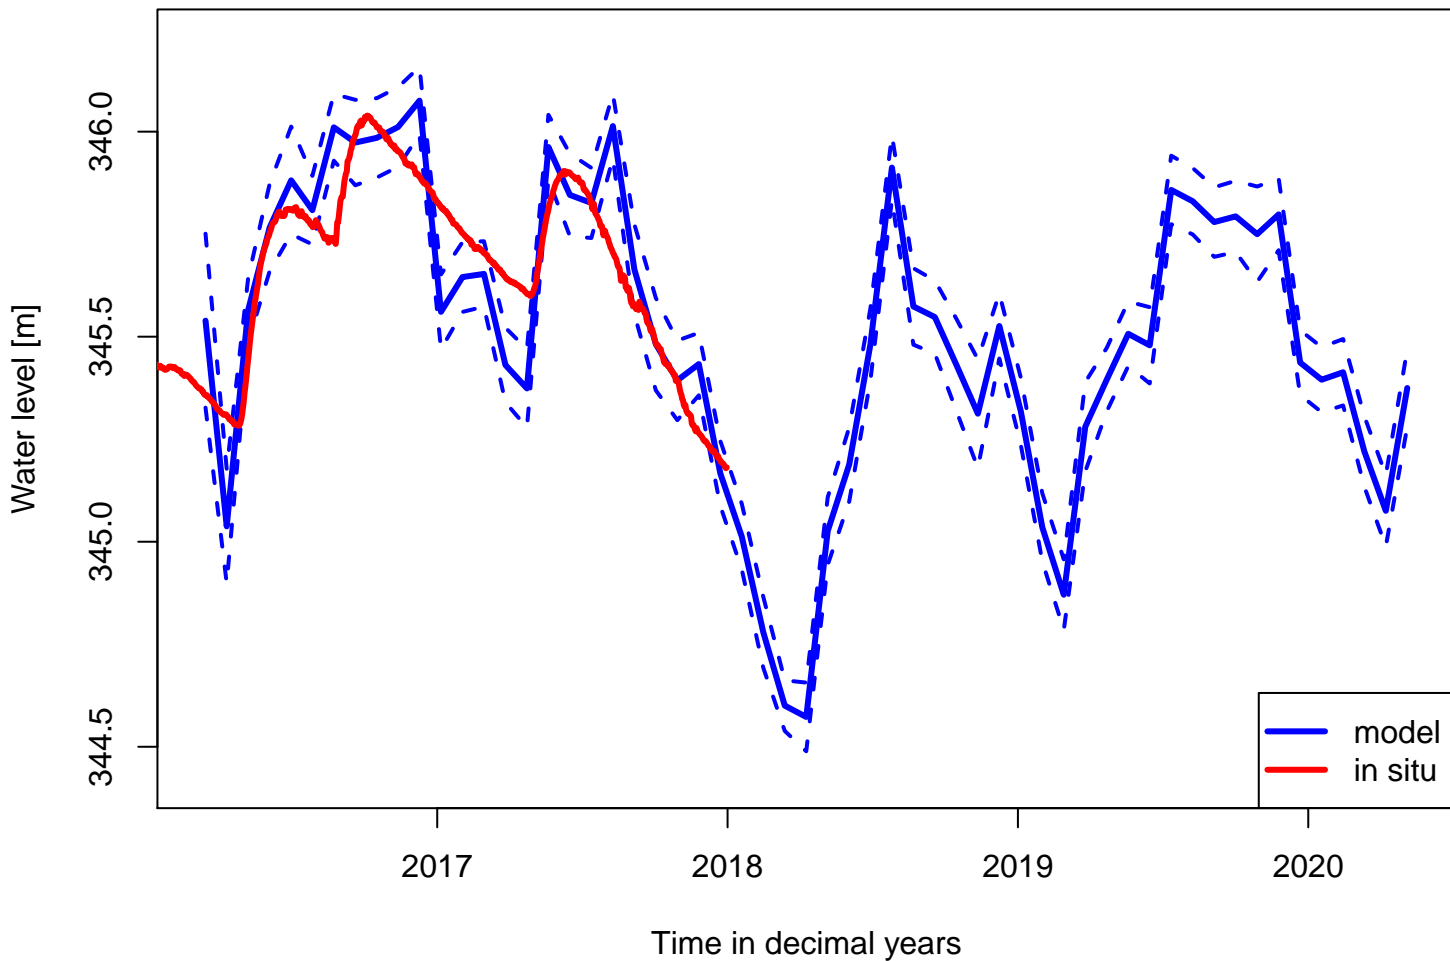

Supplement: s1 [file s1]

**lakename: Walker Lake lakeid: 795 lat: 38.68 lon: -118.8**

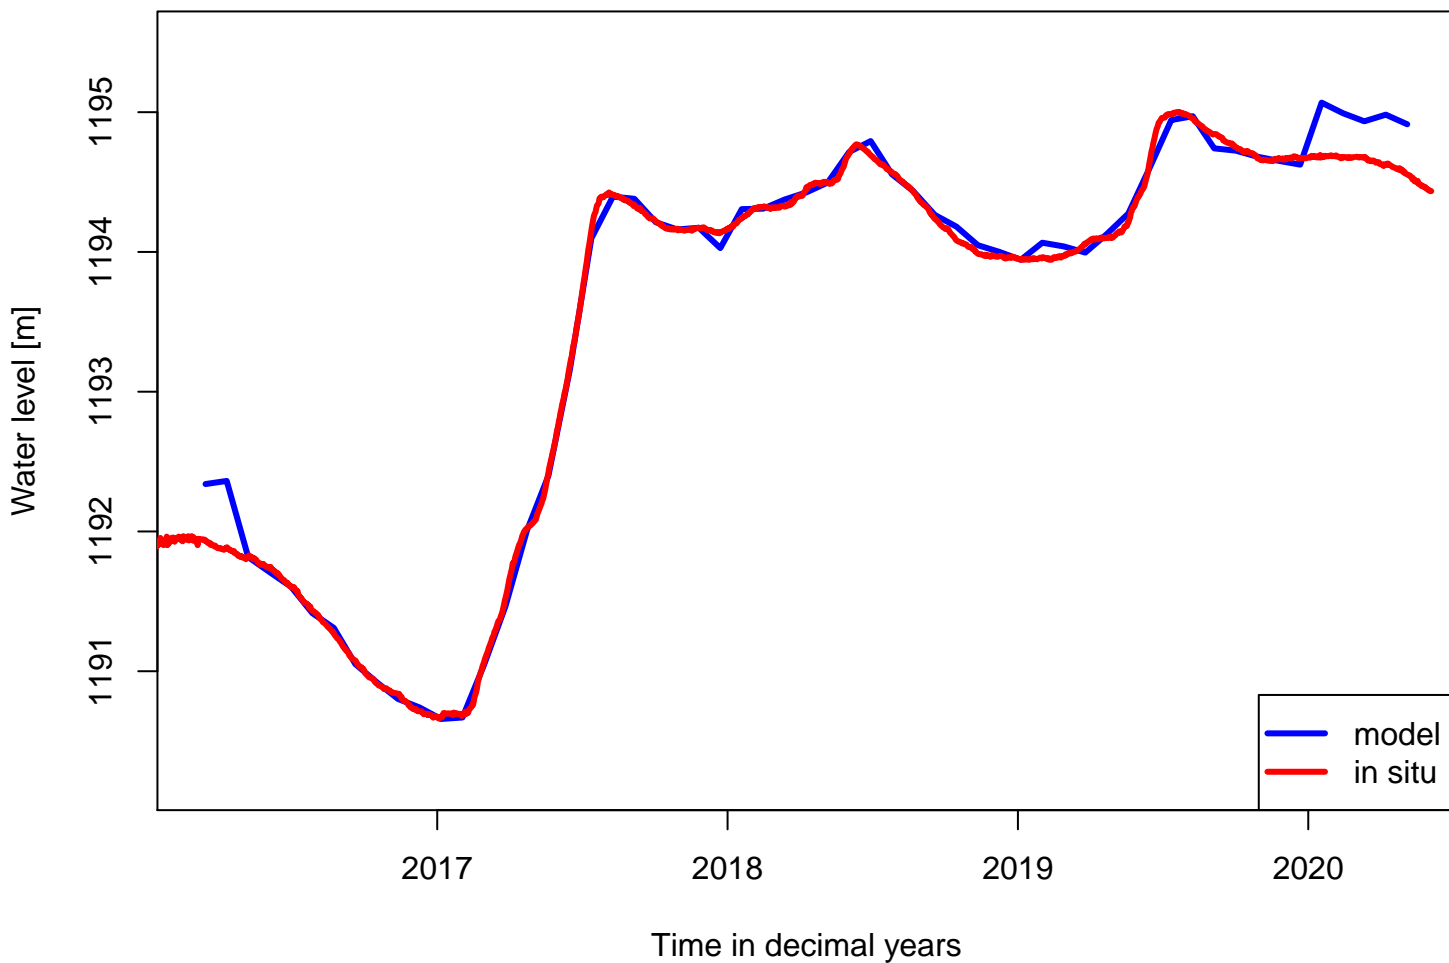

Supplement: s1 [file s1]

**lakename: Nipissing lakeid: 745 lat: 46.31 lon: -79.47**

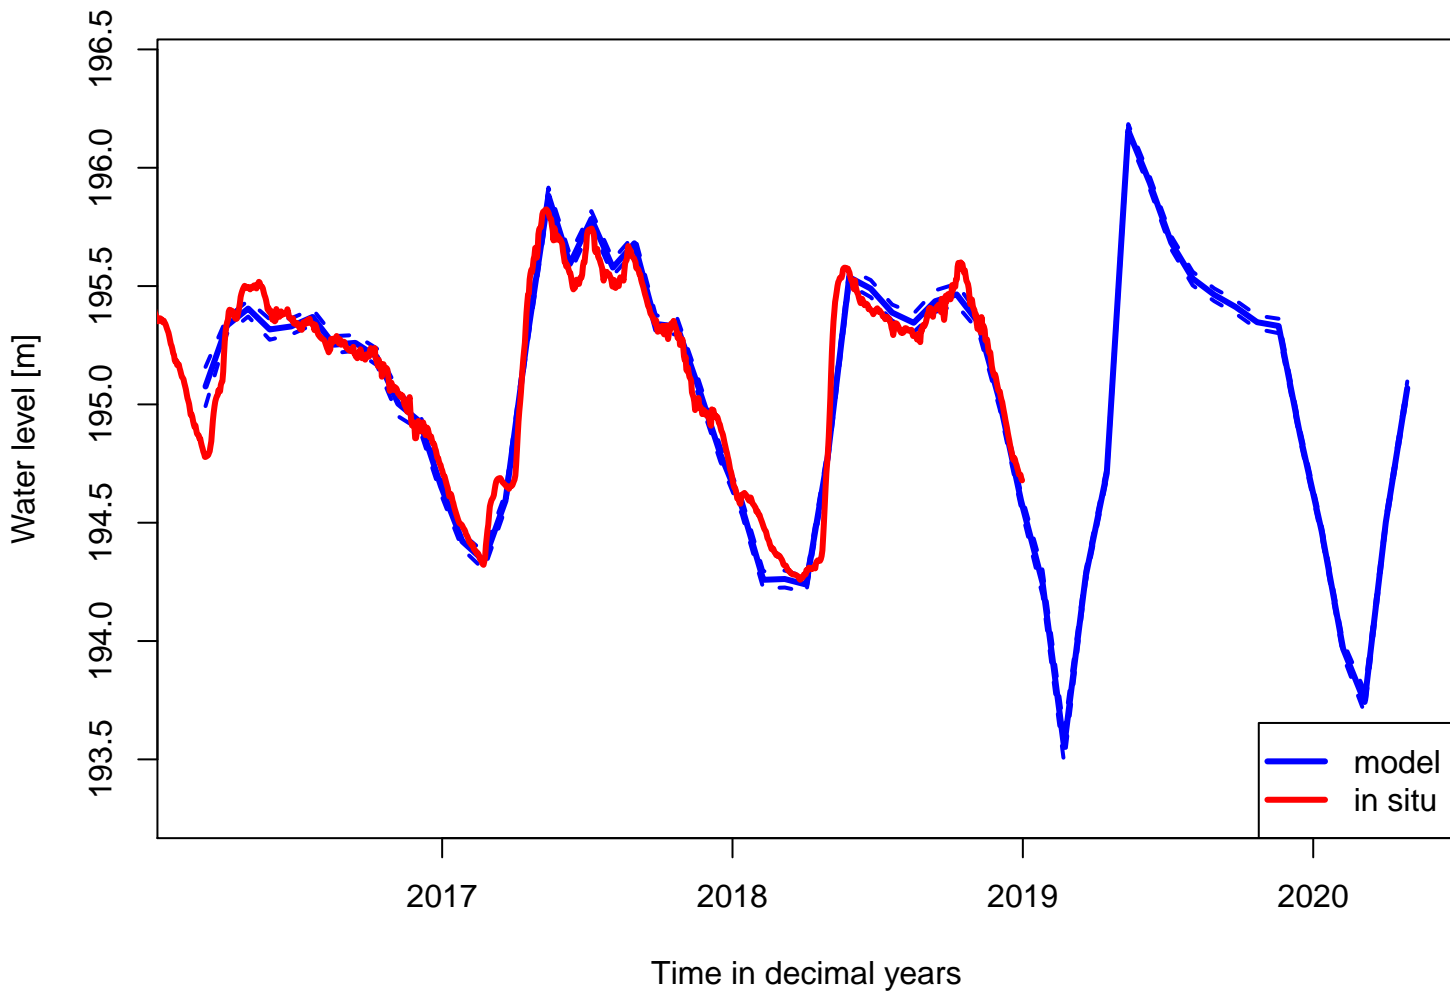

Supplement: s1 [file s1]

**lakename: Point lakeid: 278 lat: 65.4 lon: -114**

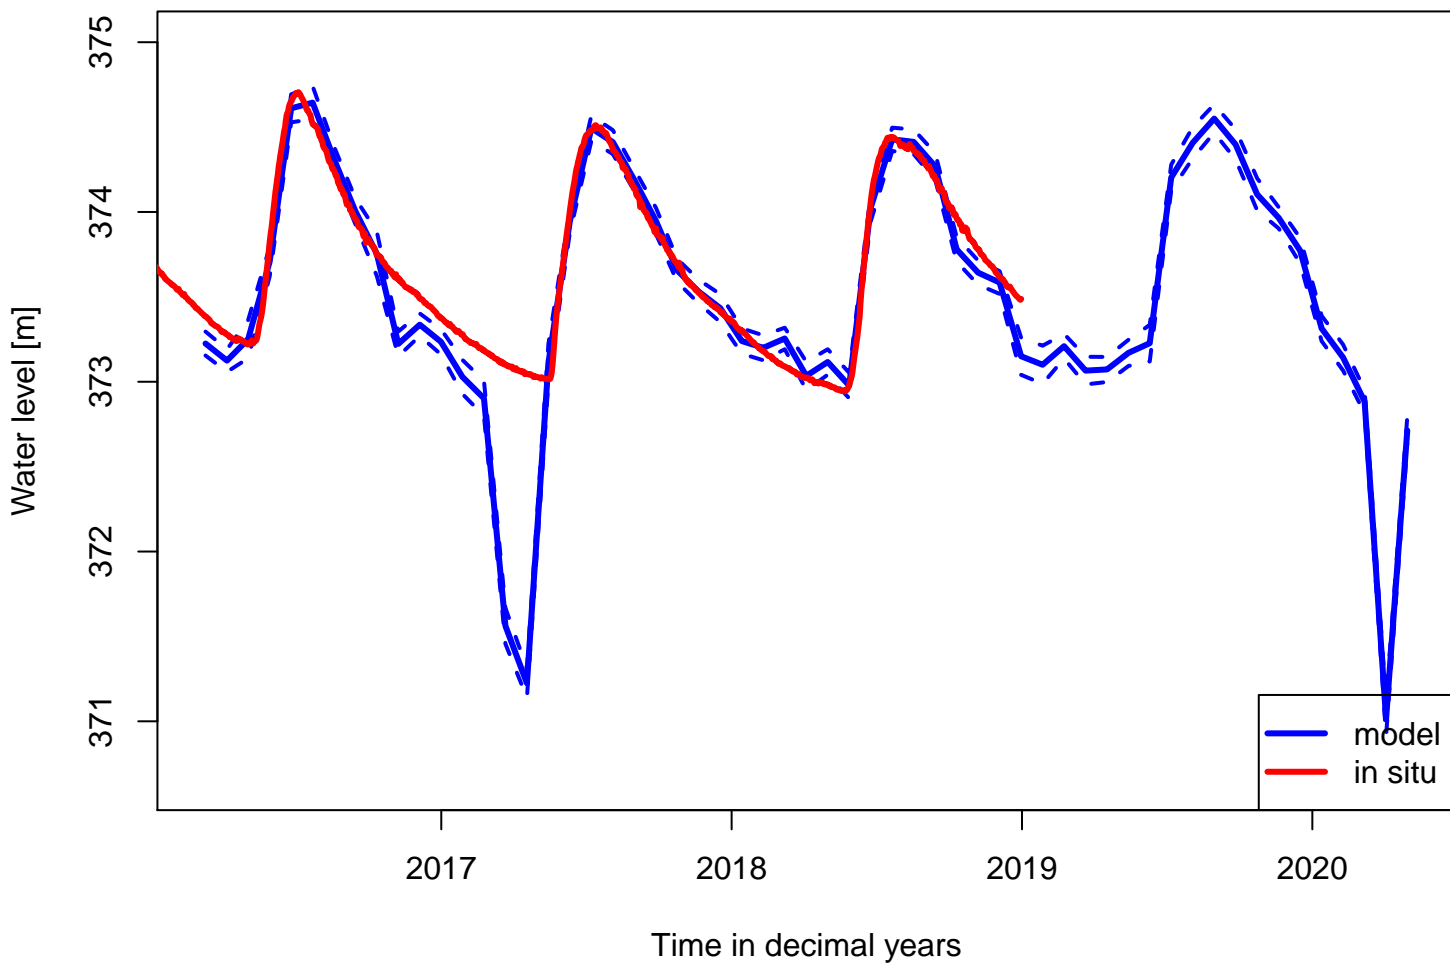

Supplement: s1 [file s1]

**lakename: Biche lakeid: 531 lat: 54.77 lon: -112**

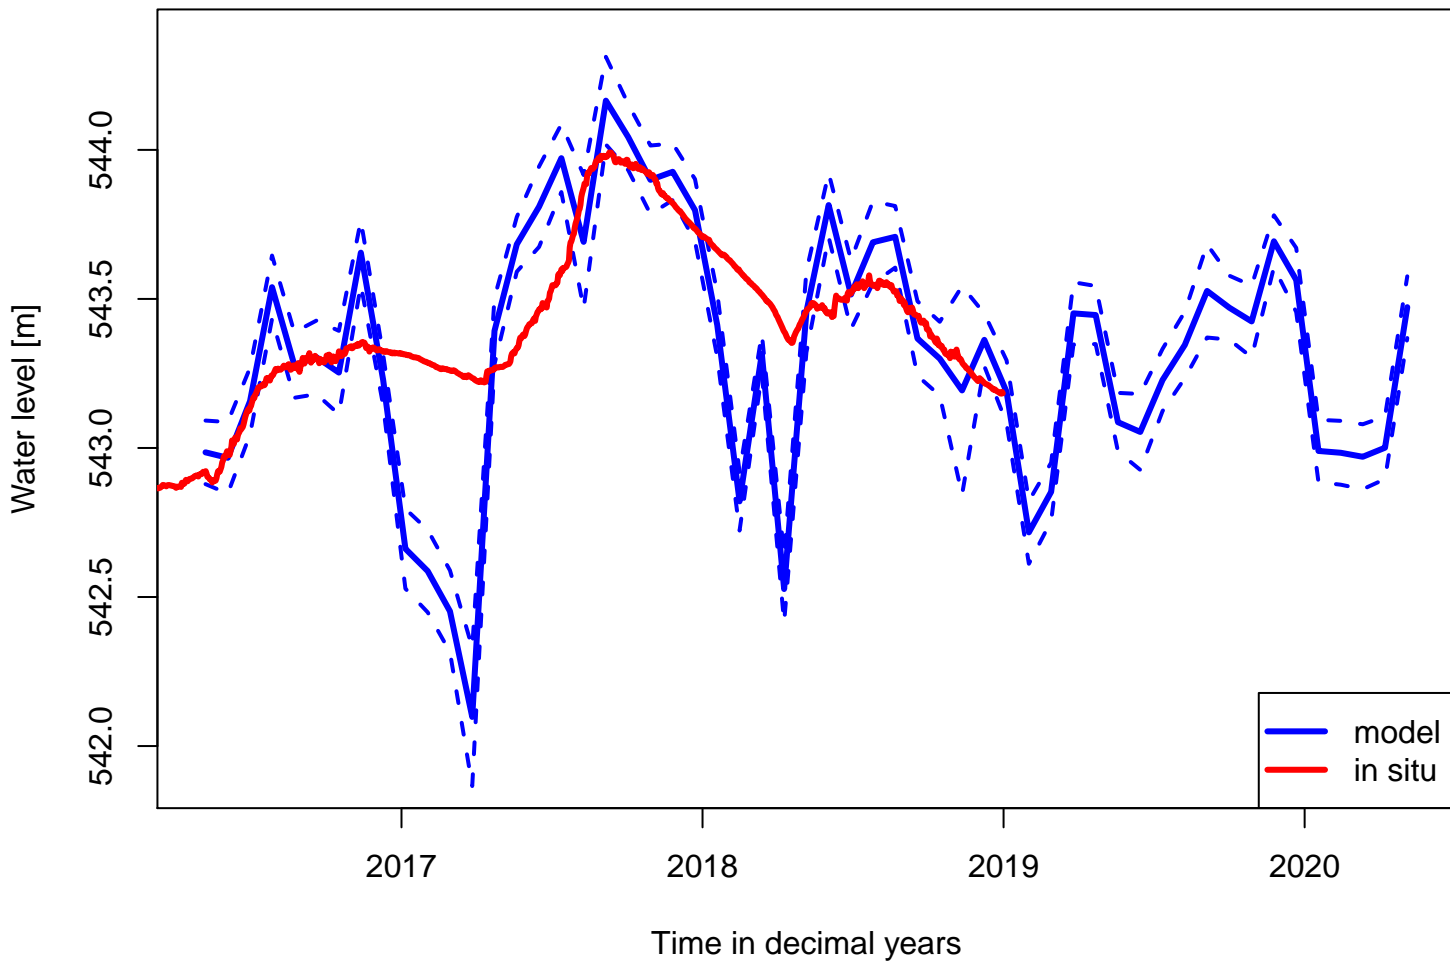

Supplement: s1 [file s1]

**lakename: Contwoyto lakeid: 22 lat: 65.78 lon: -111.2**

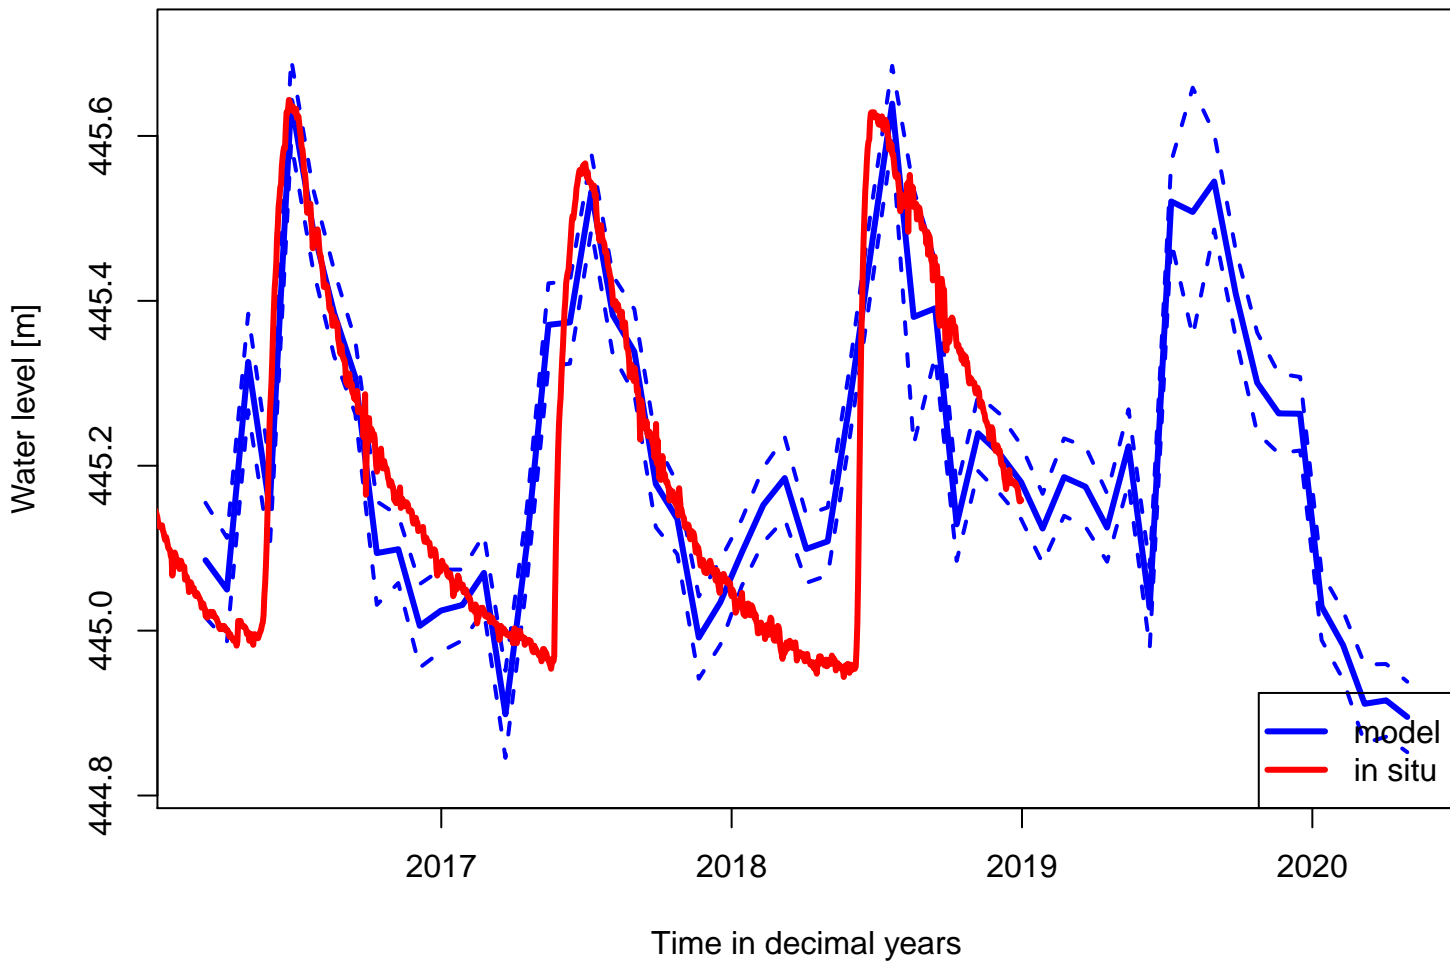

Supplement: s1 [file s1]

**lakename: Lac La Croix lakeid: 718 lat: 48.38 lon: -92.18**

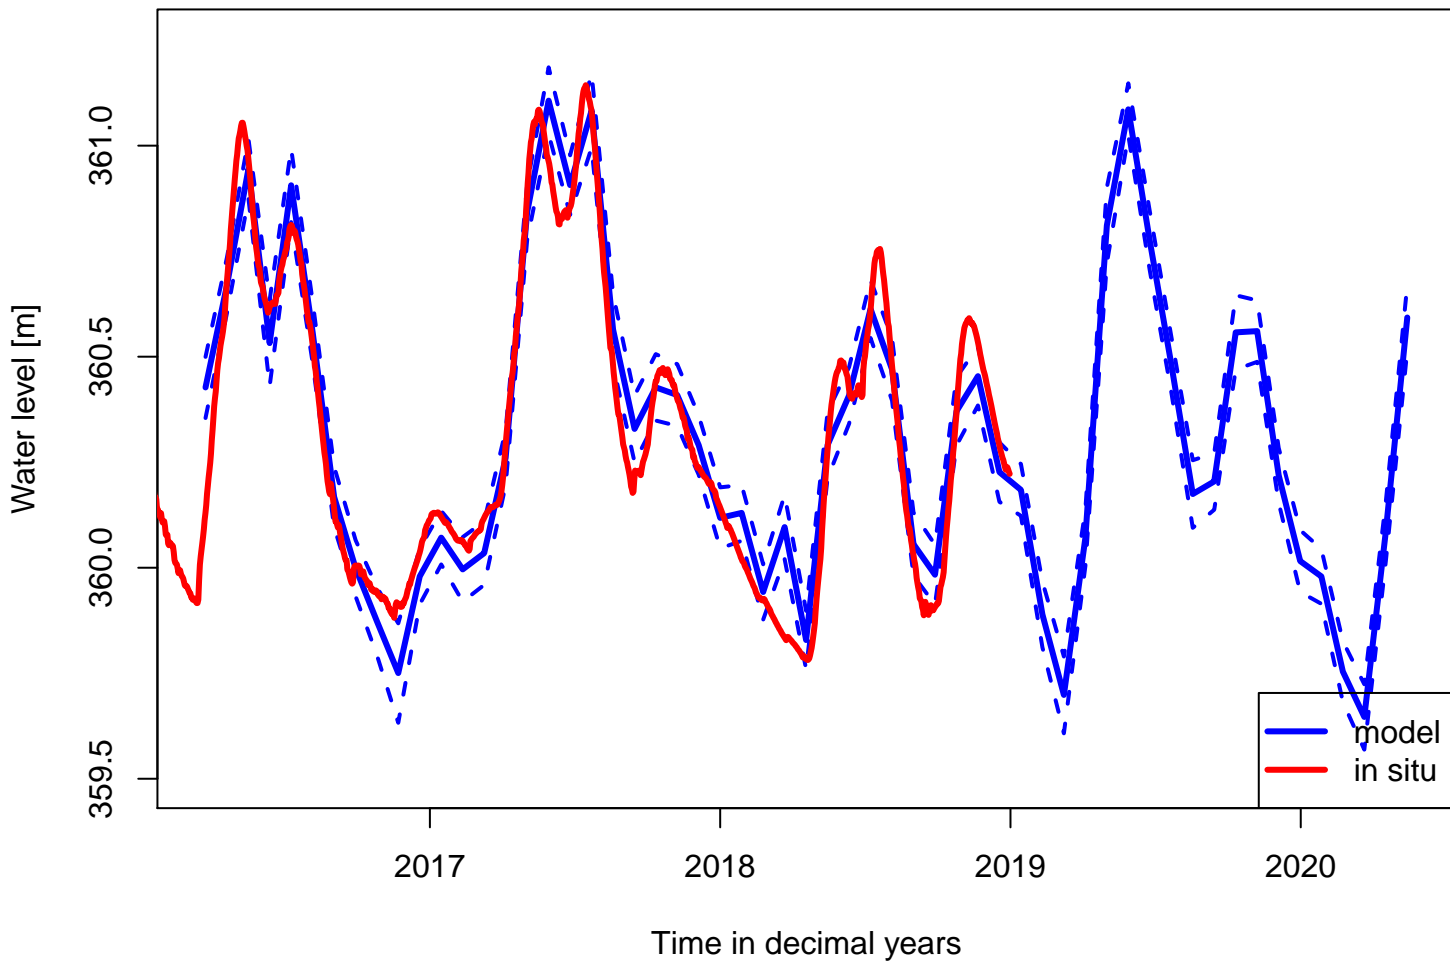

Supplement: s1 [file s1]

**lakename: Mullet Lake lakeid: 8819 lat: 45.58 lon: -84.49**

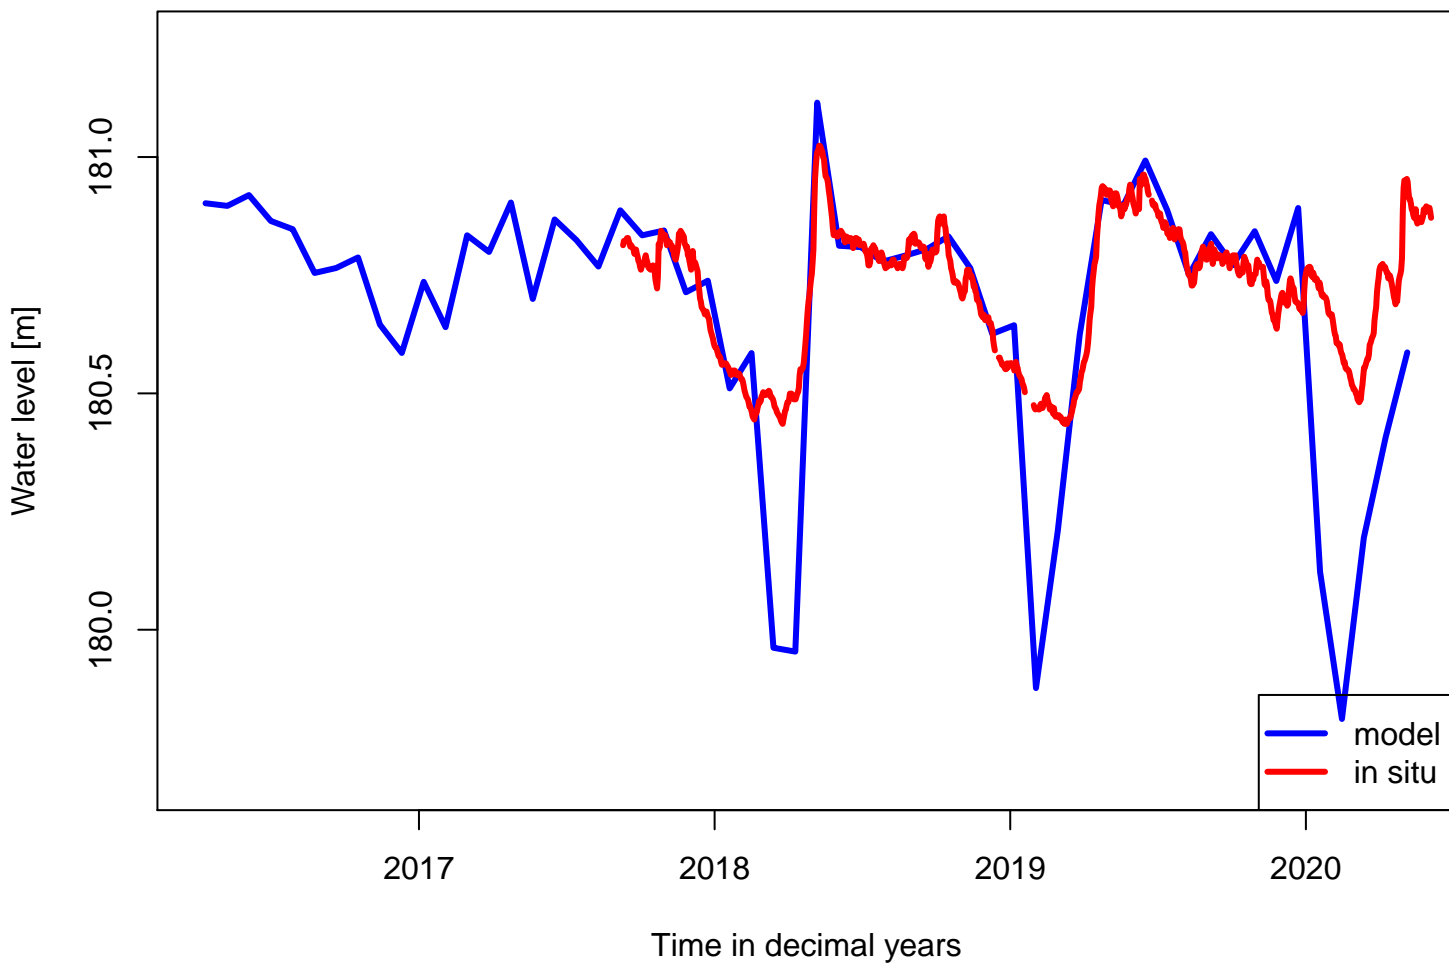

Supplement: s1 [file s1]

**lakename: Kinbasket lakeid: 628 lat: 51.89 lon: -117.9**

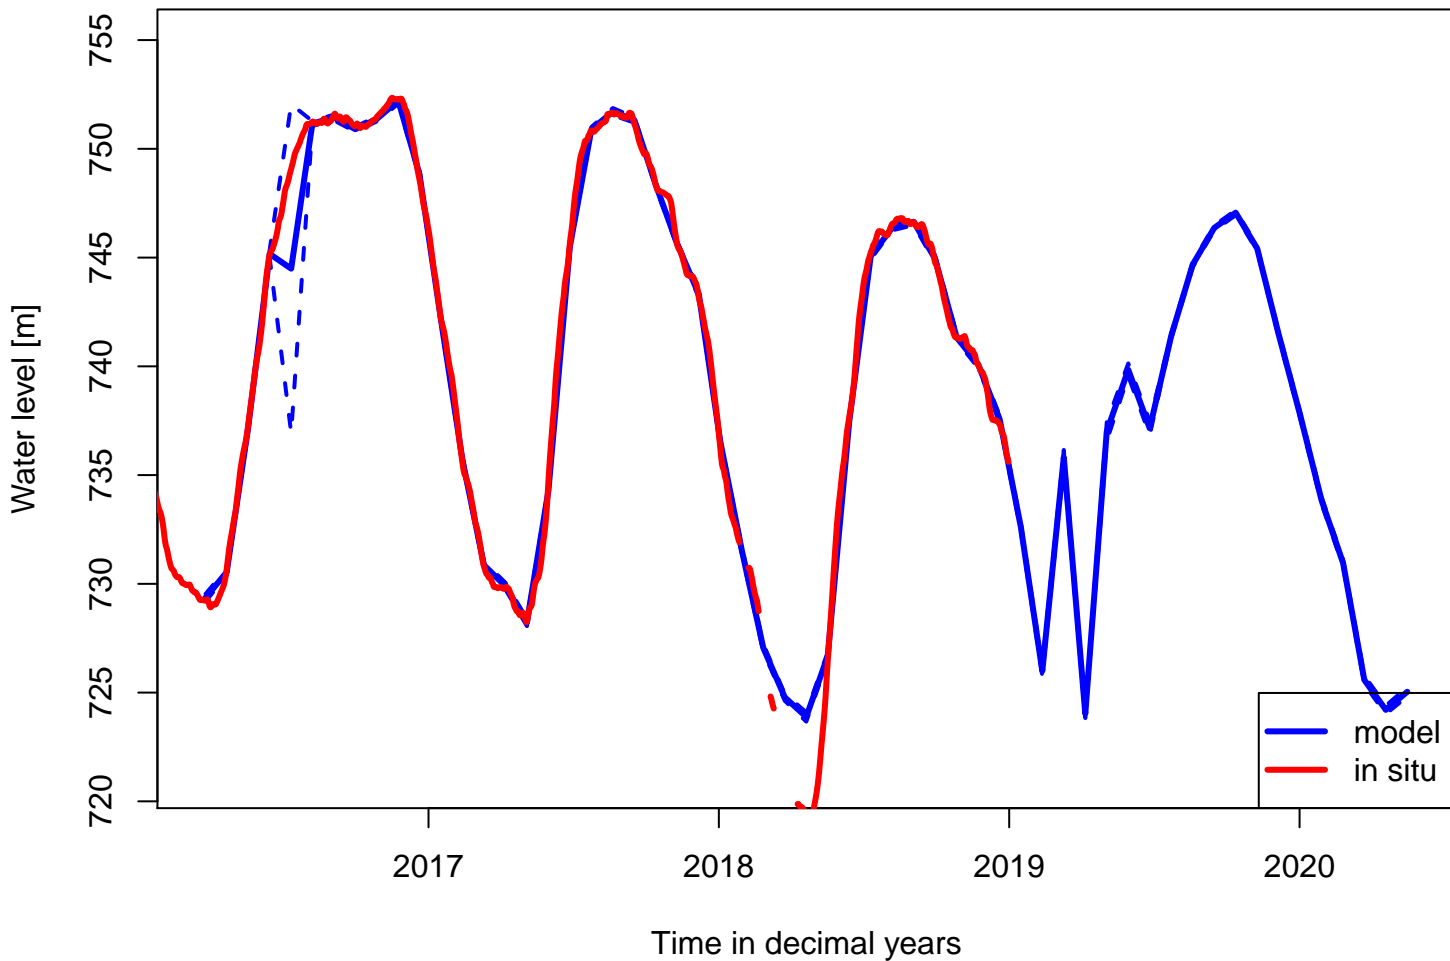

Supplement: s1 [file s1]

**lakename: Kootenay lakeid: 696 lat: 49.3 lon: -116.7**

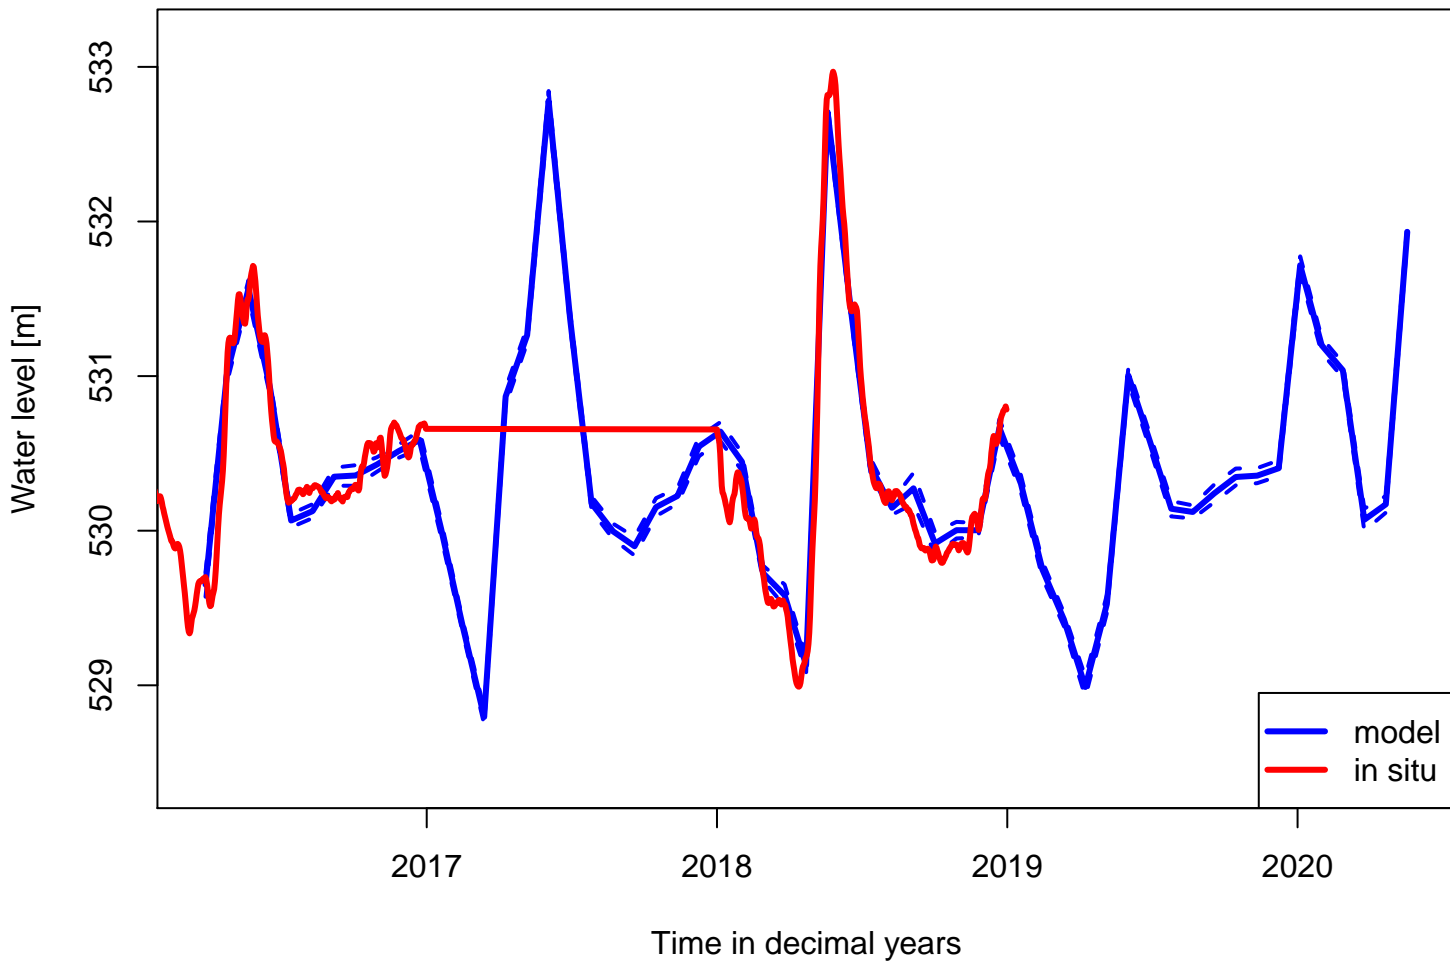

Supplement: s1 [file s1]

**lakename: Granville lakeid: 471 lat: 56.23 lon: -100.6**

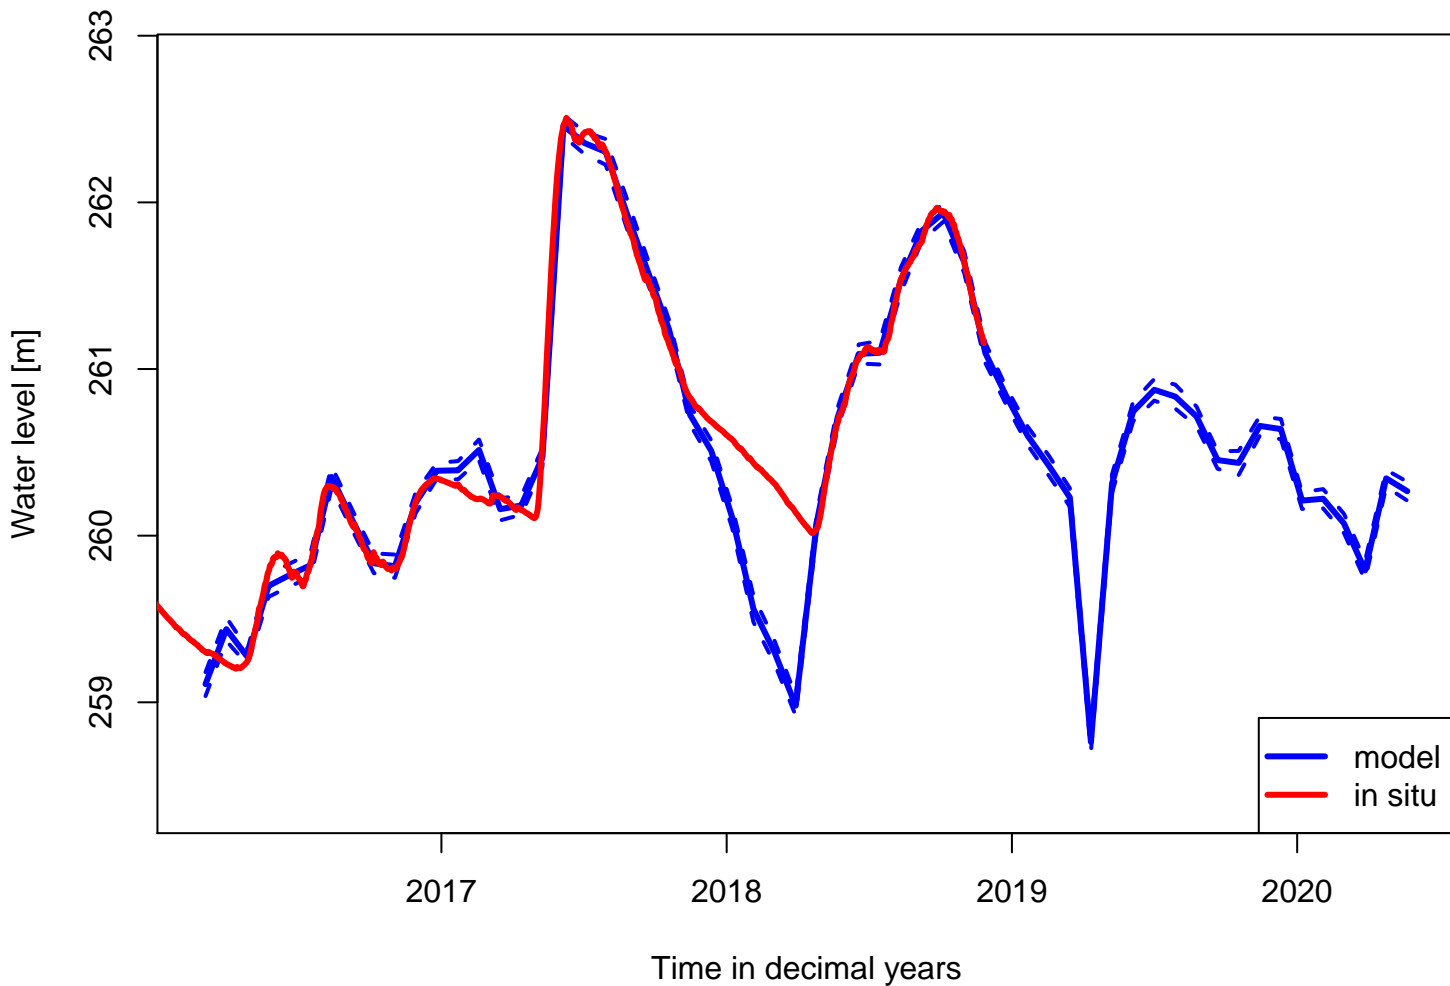

Supplement: s1 [file s1]

**lakename: Teslin lakeid: 394 lat: 60.16 lon: -132.7**

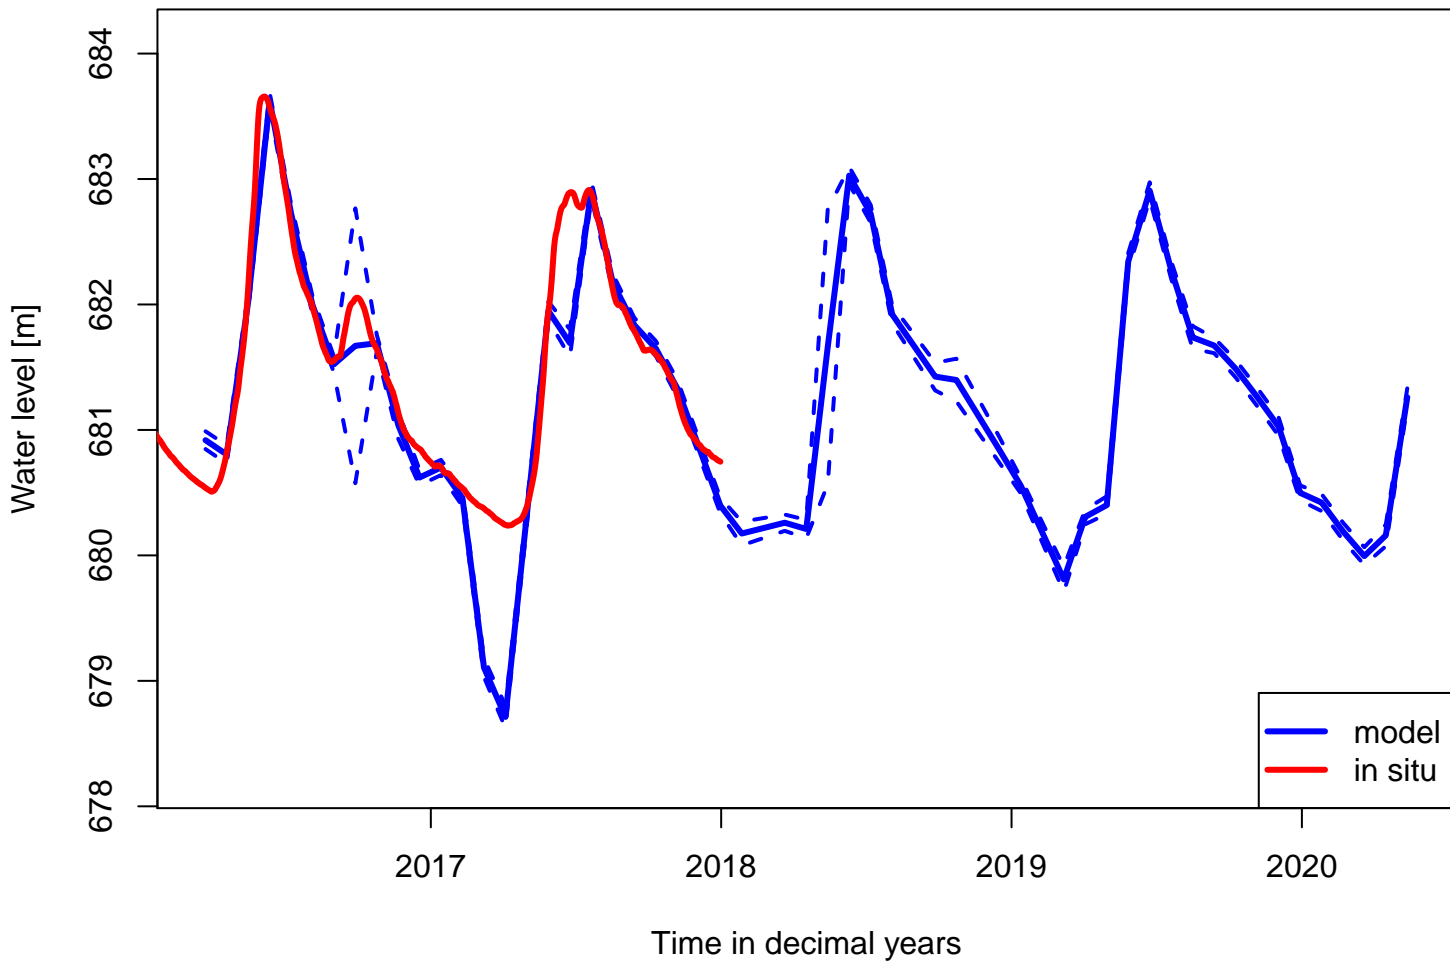

Supplement: s1 [file s1]

**lakename: lakeid: 749 lat: 45.82 lon: -77.13**

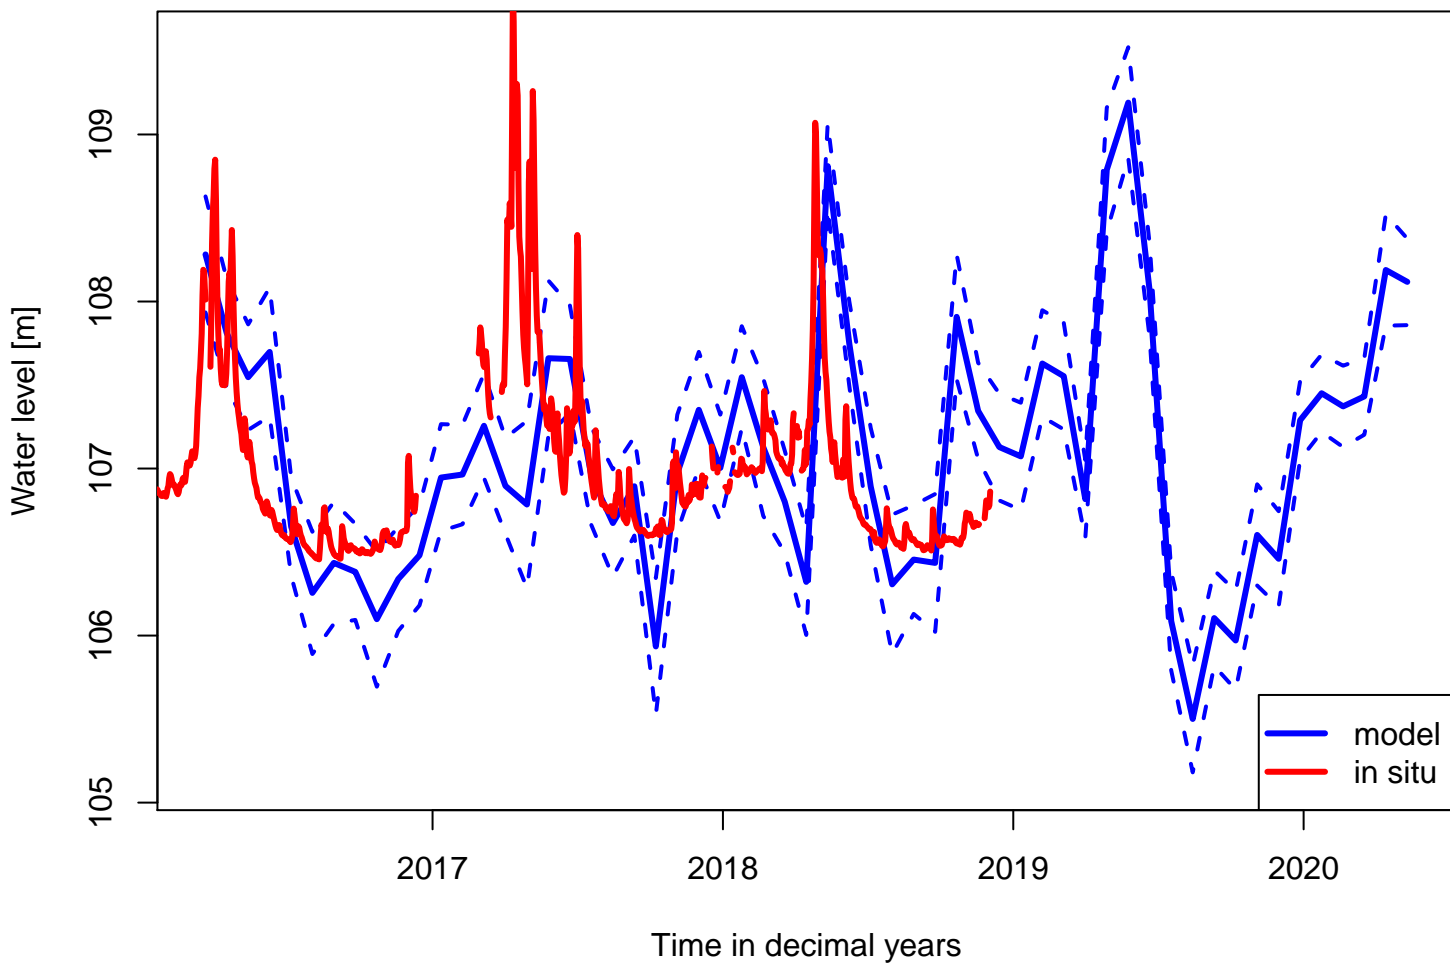

Supplement: s1 [file s1]

**lakename: lakeid: 616 lat: 52.67 lon: -93.99**

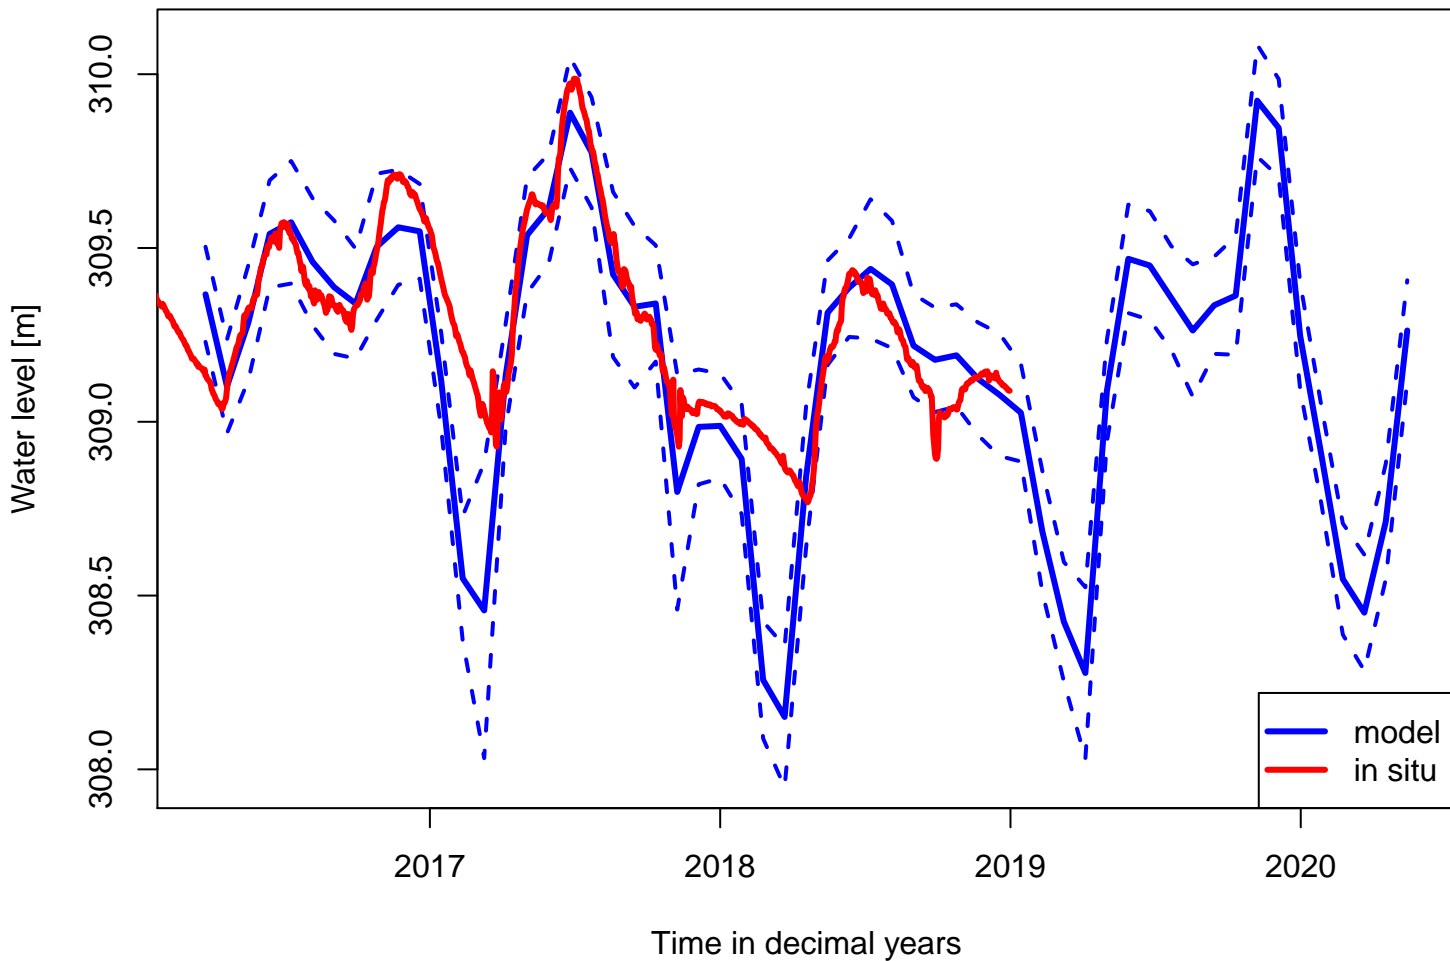

Supplement: s1 [file s1]

**lakename: Lac La Croix lakeid: 718 lat: 48.38 lon: -92.18**

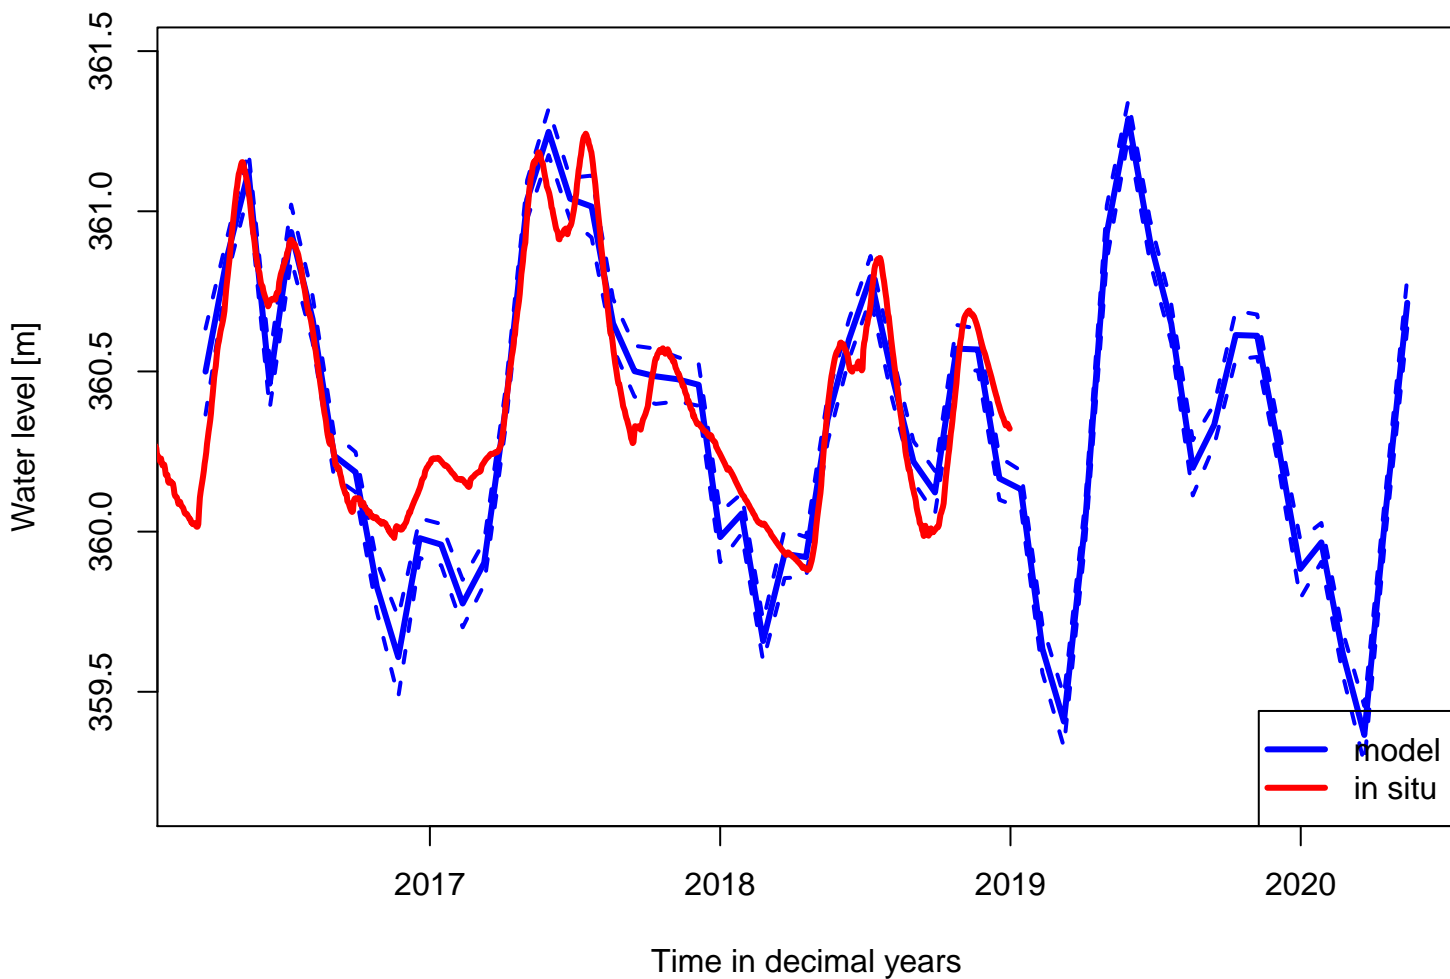

Supplement: s1 [file s1]

**lakename: lakeid: 713 lat: 48.5 lon: -92.66**

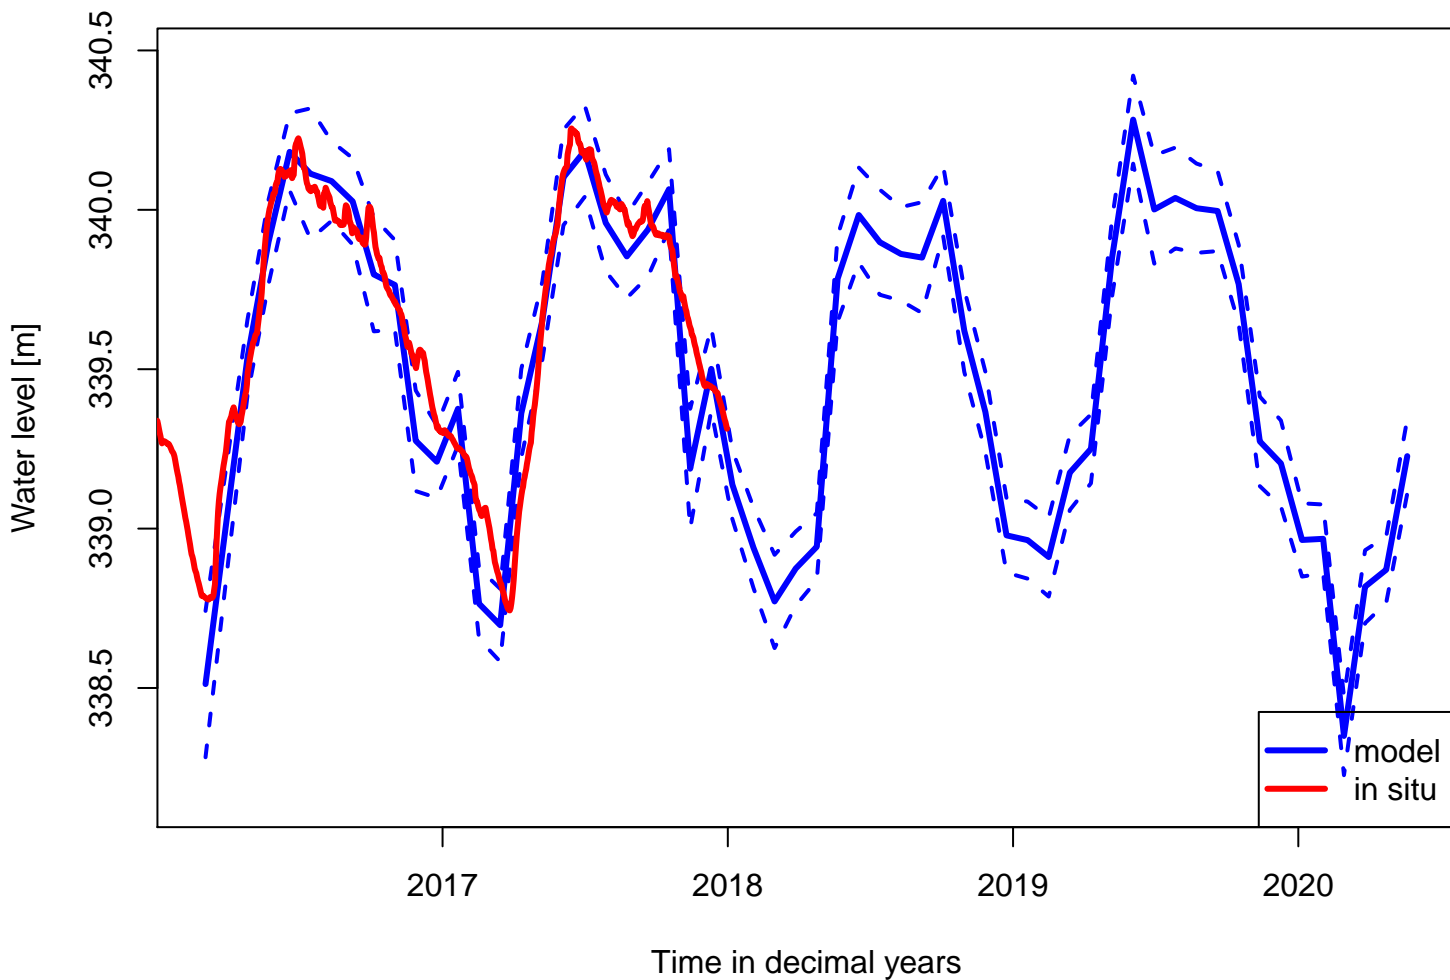

Supplement: s1 [file s1]

**lakename: Pend Oreille Lake lakeid: 719 lat: 48.28 lon: -116.3**

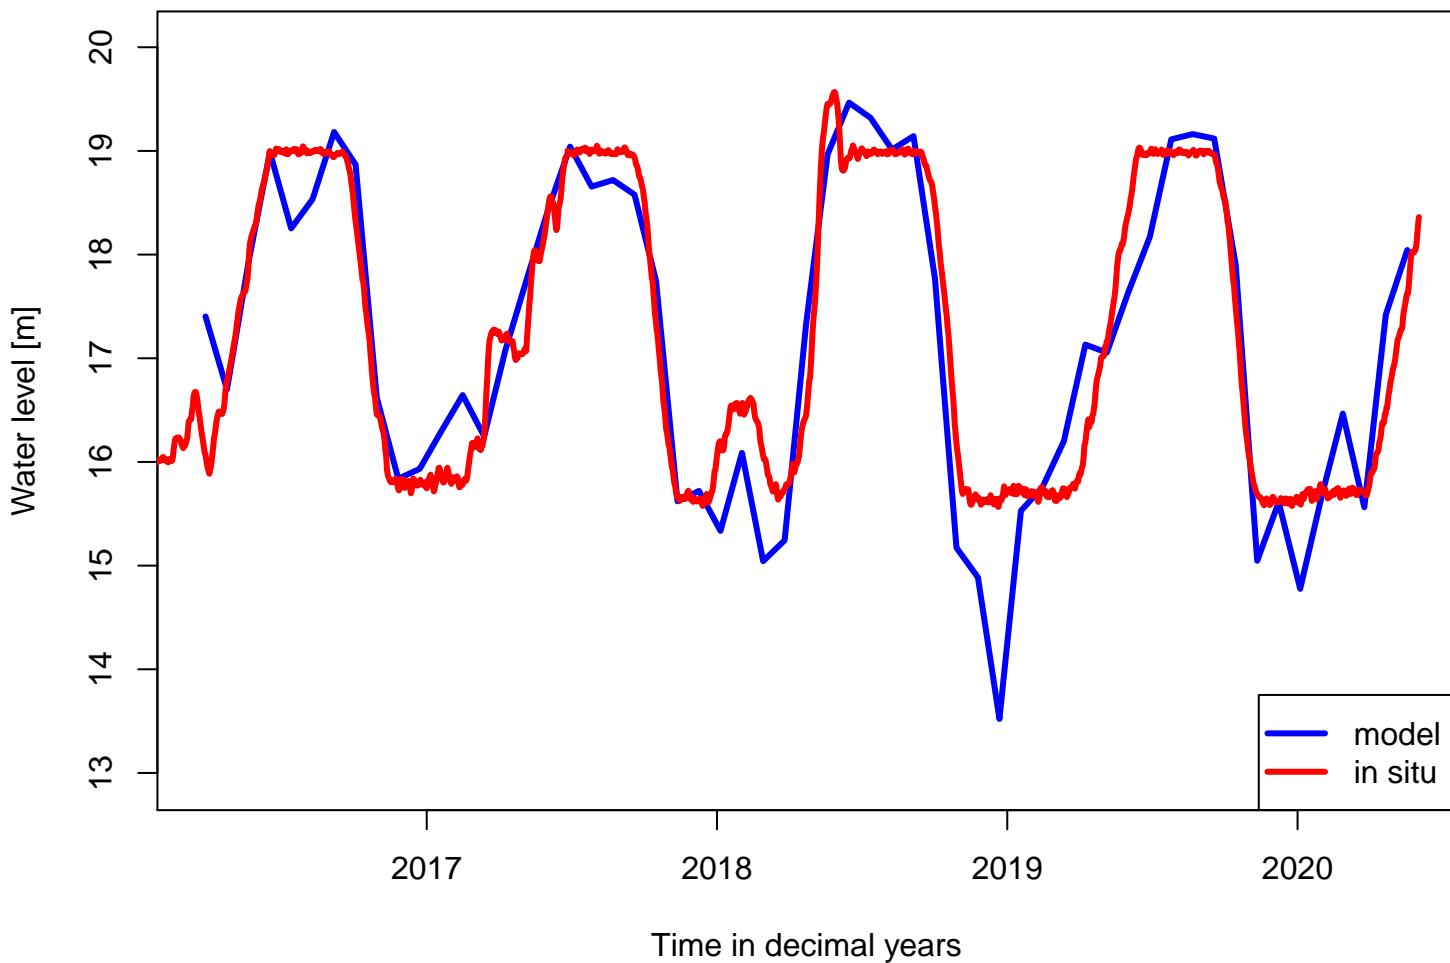

Supplement: s1 [file s1]

**lakename: Woods lakeid: 57 lat: 48.9 lon: -95.32**

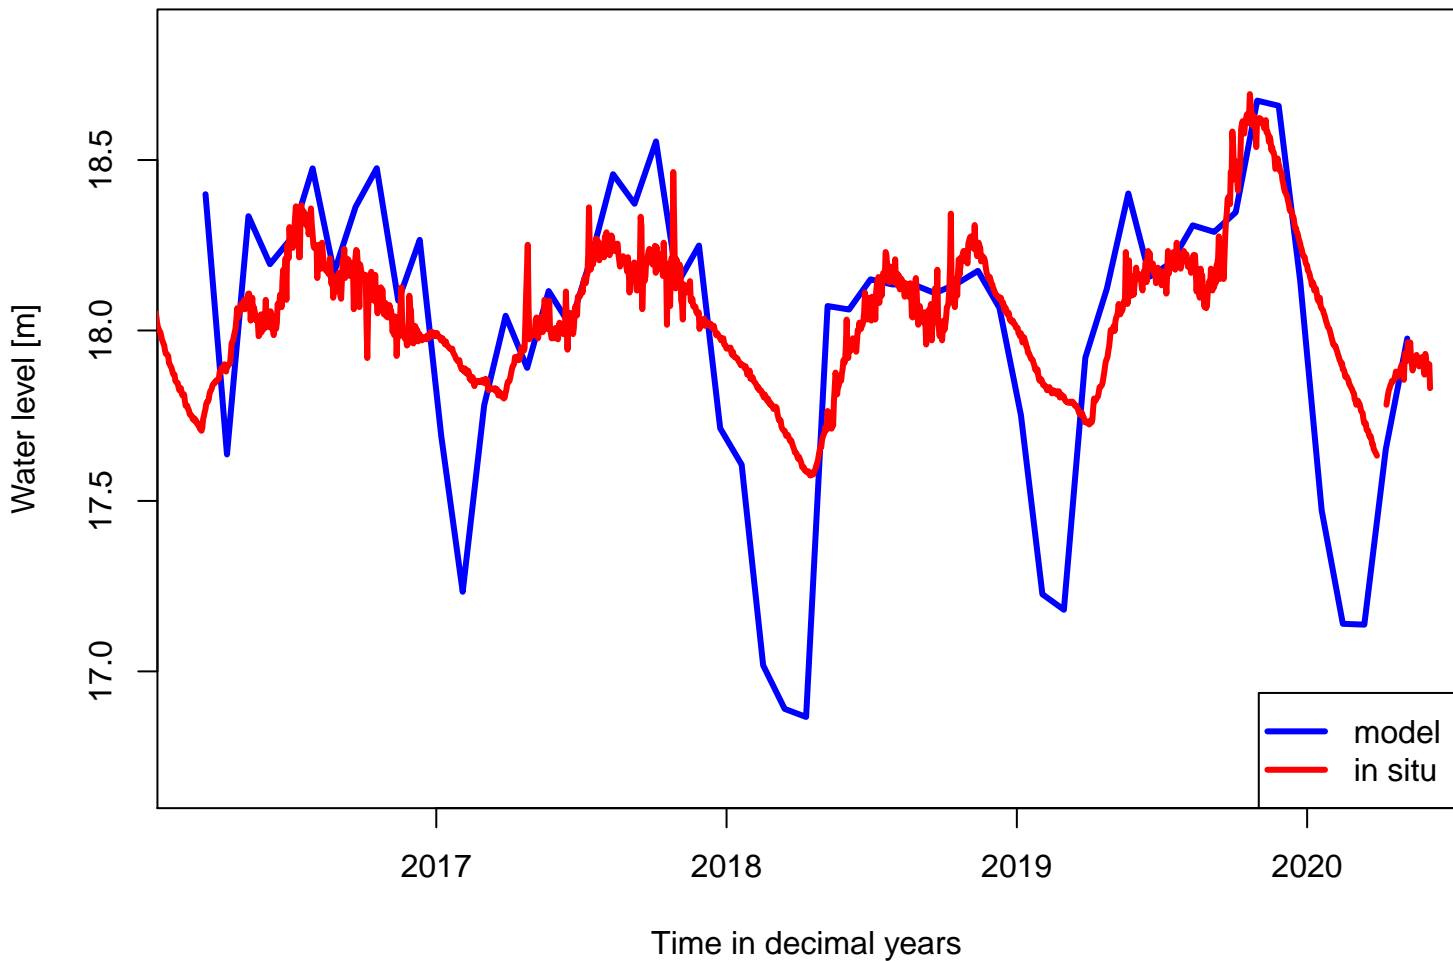

Supplement: s1 [file s1]

**lakename: Manitoba lakeid: 53 lat: 51.44 lon: -98.8**

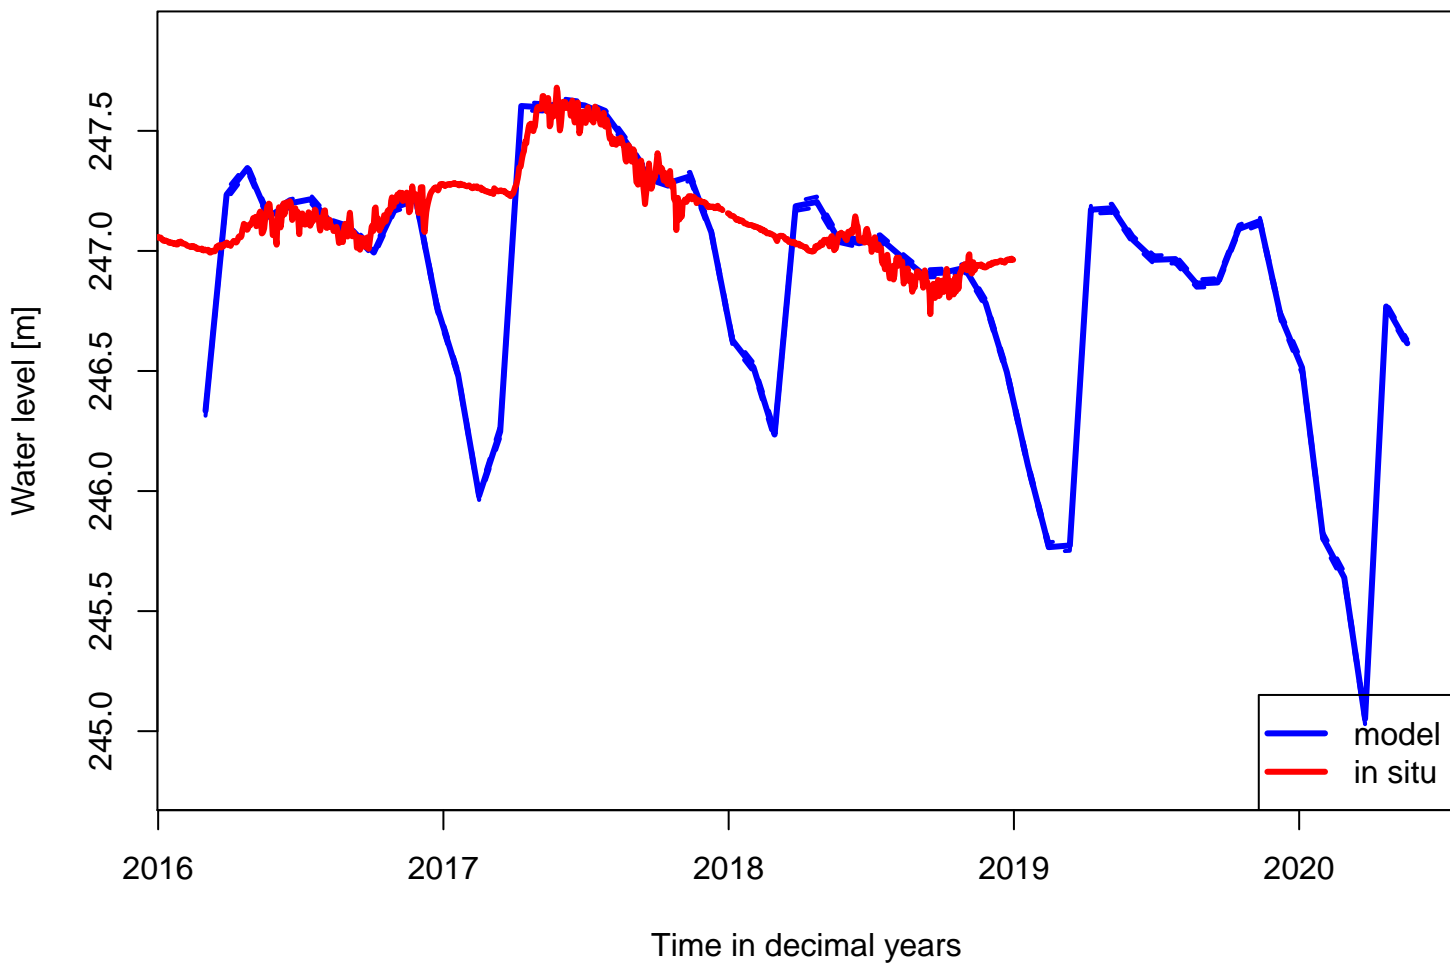

Supplement: s1 [file s1]

**lakename: lakeid: 6545 lat: 54.16 lon: -110.7**

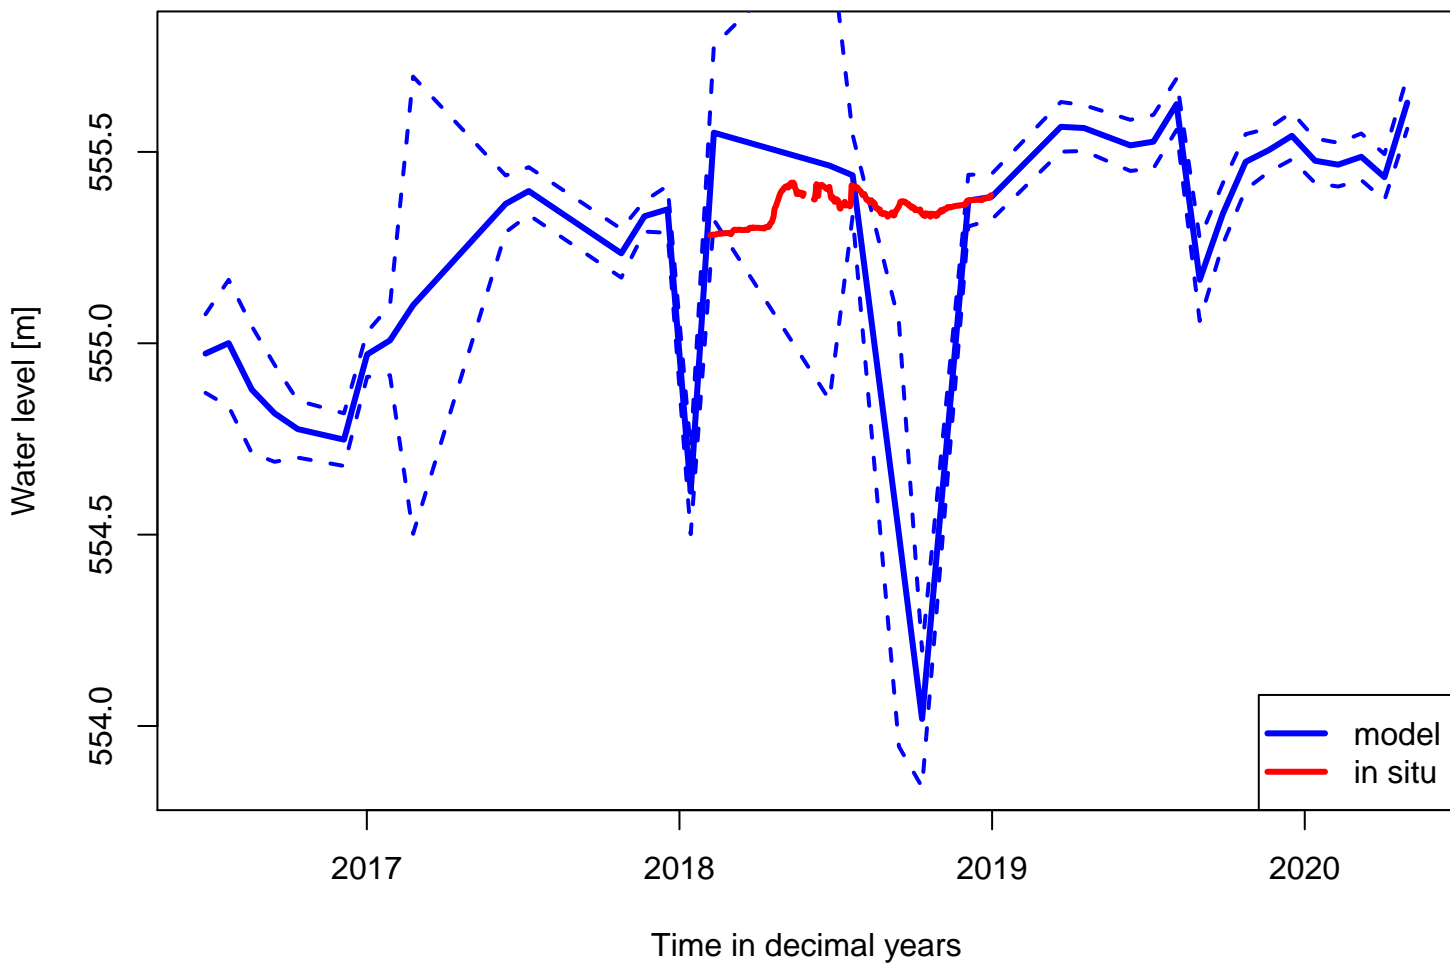

Supplement: s1 [file s1]
