# Supplementary material (part 5 of 5)
Source: MDPI journal article supplement (https://www.mdpi.com/2072-4292/12/17/2835)

**lakename: Delarondo lakeid: 575 lat: 53.89 lon: -106.9**

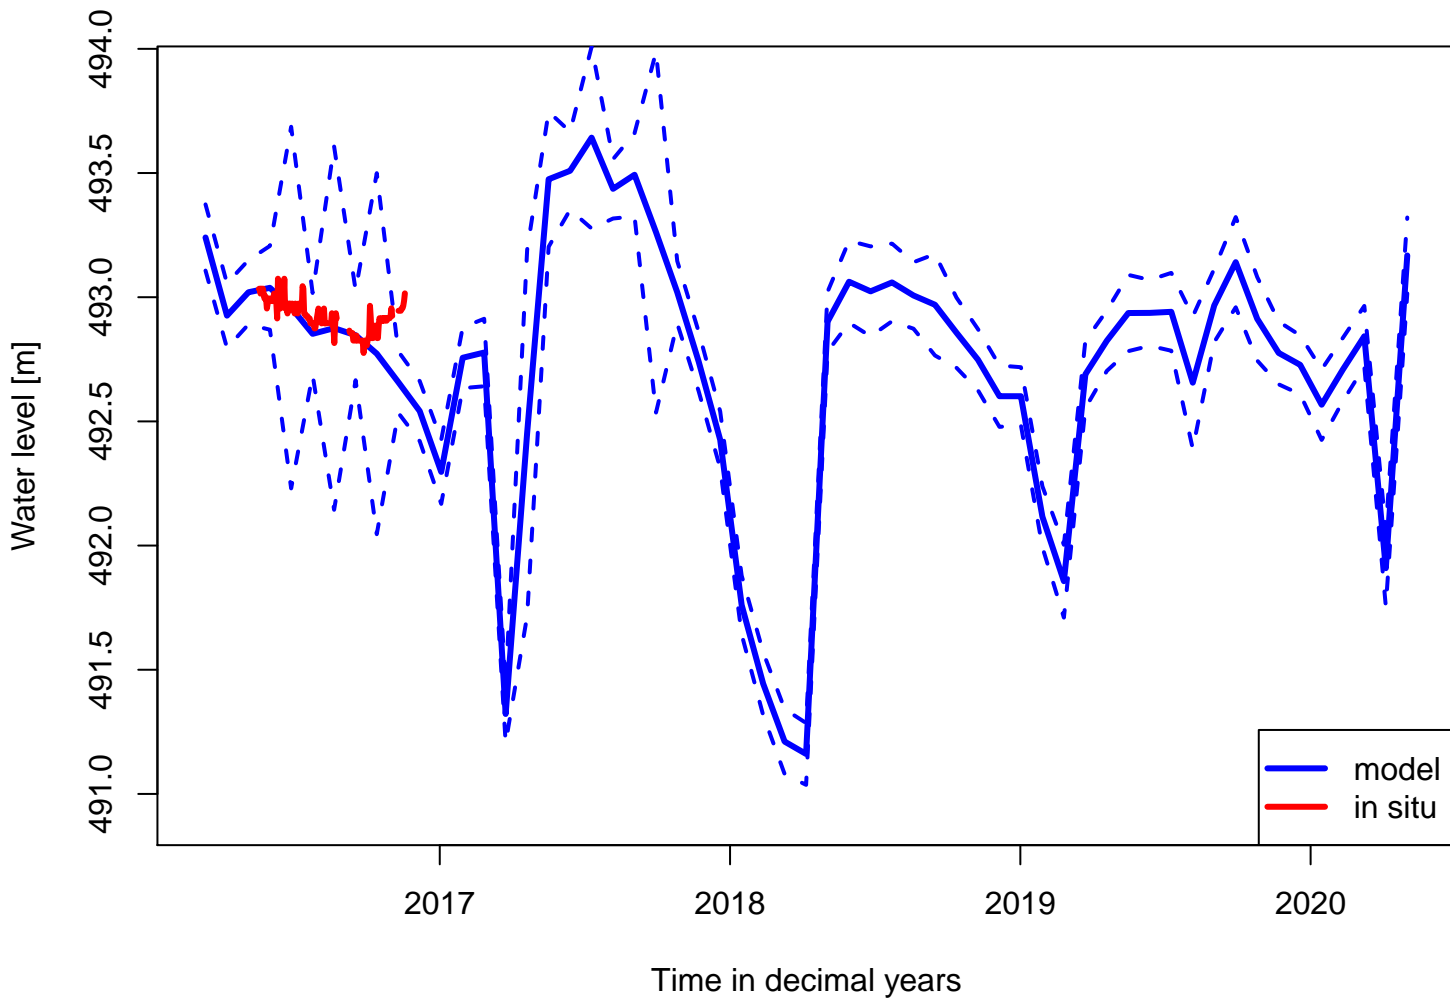

Supplement: s1 [file s1]

**lakename: Winnipegosis lakeid: 52 lat: 52.97 lon: -101**

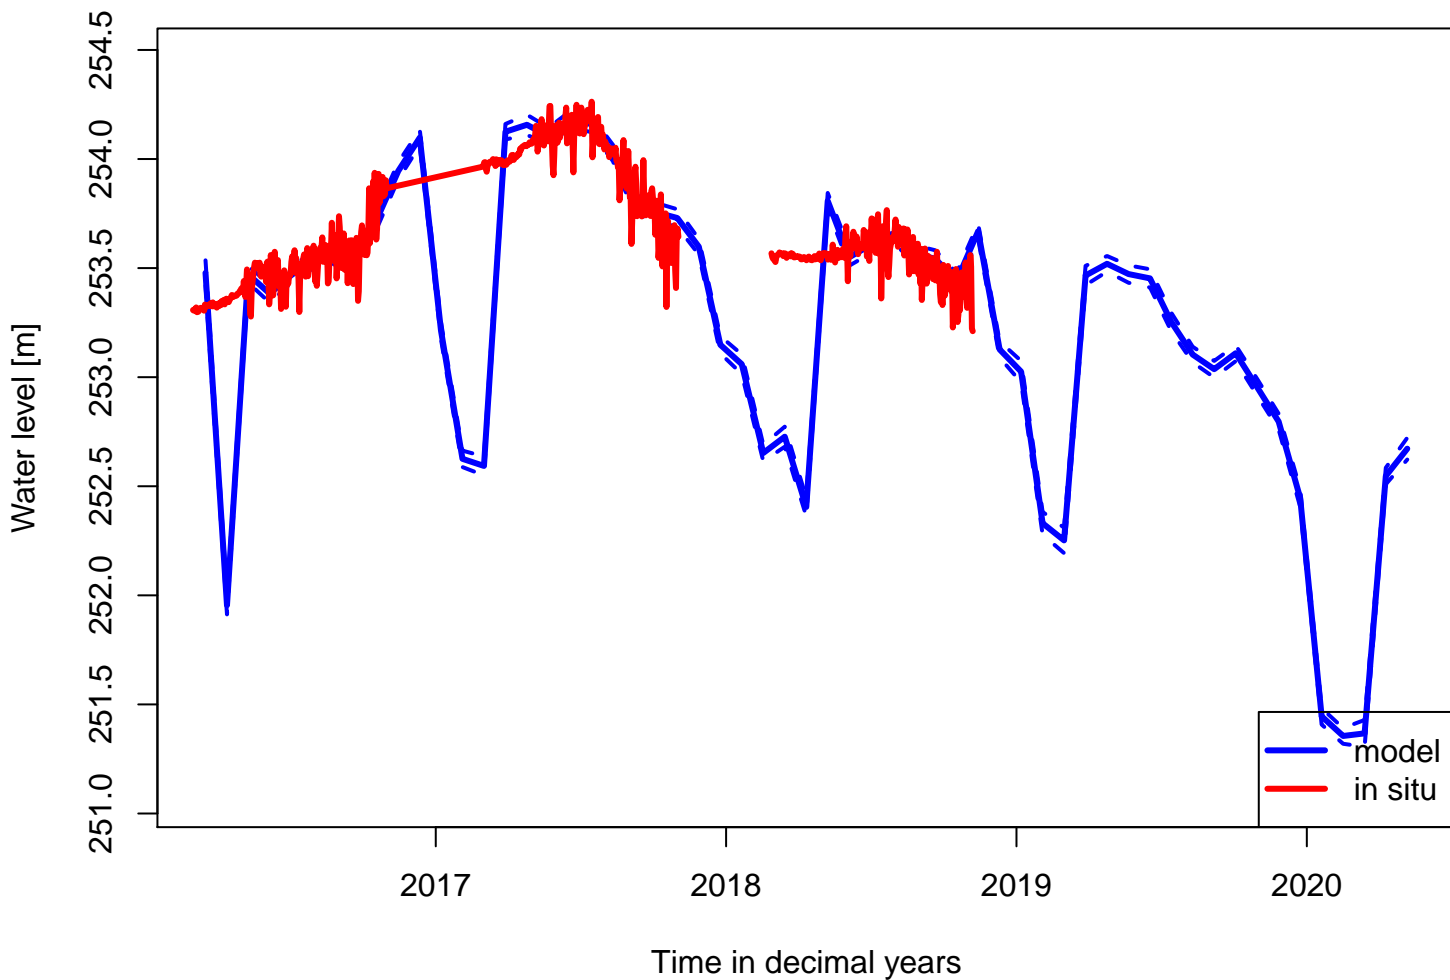

Supplement: s1 [file s1]

**lakename: Lake Winnepesaukee lakeid: 768 lat: 43.61 lon: -71.46**

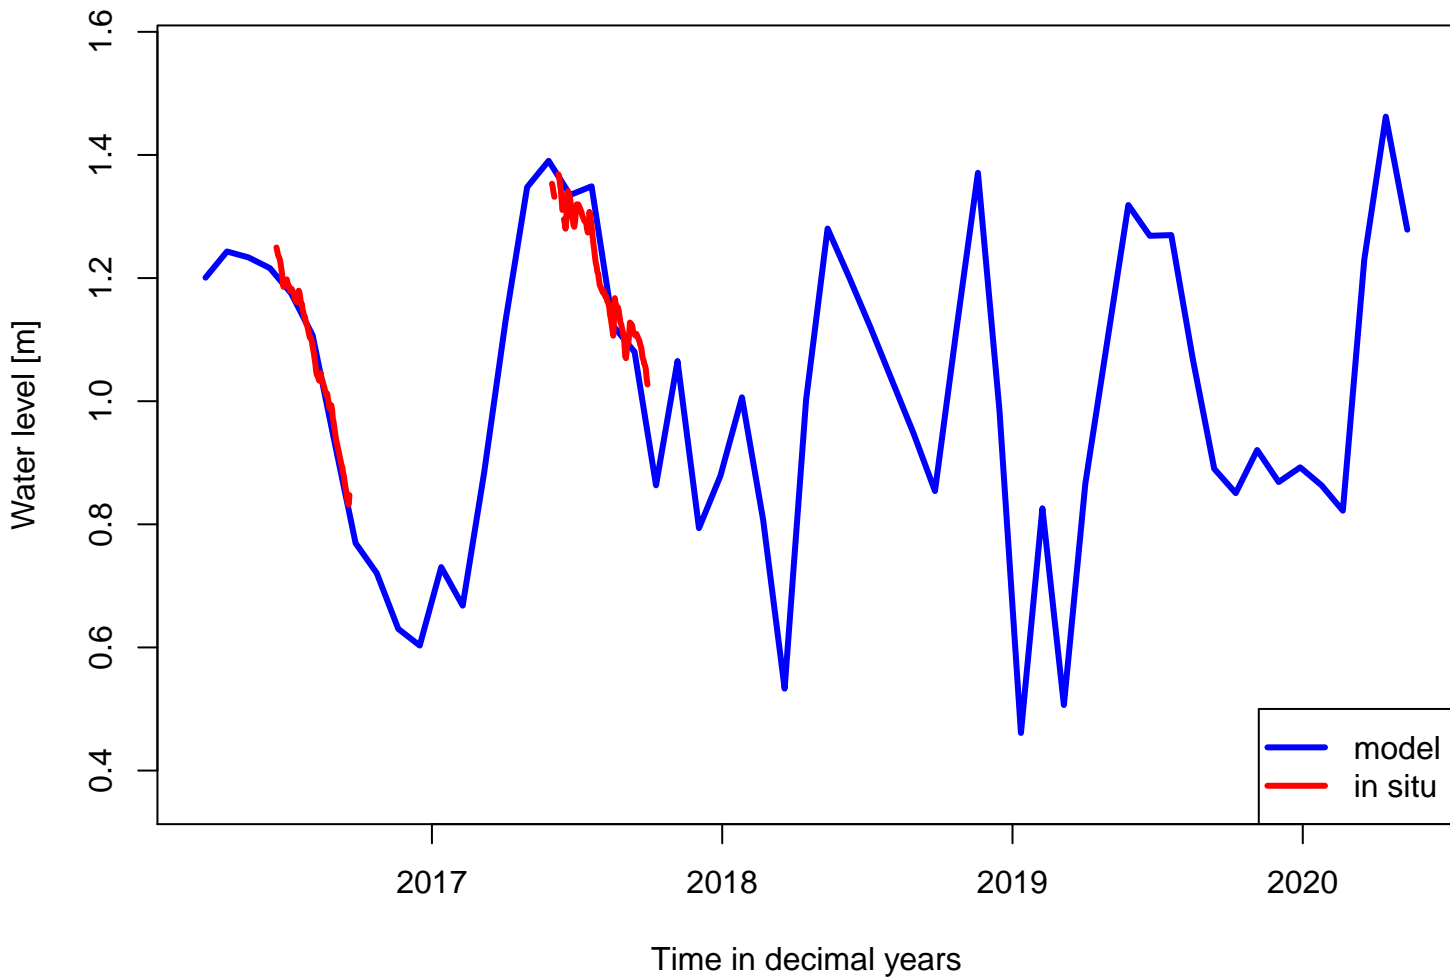

Supplement: s1 [file s1]

**lakename: lakeid: 616 lat: 52.67 lon: -93.99**

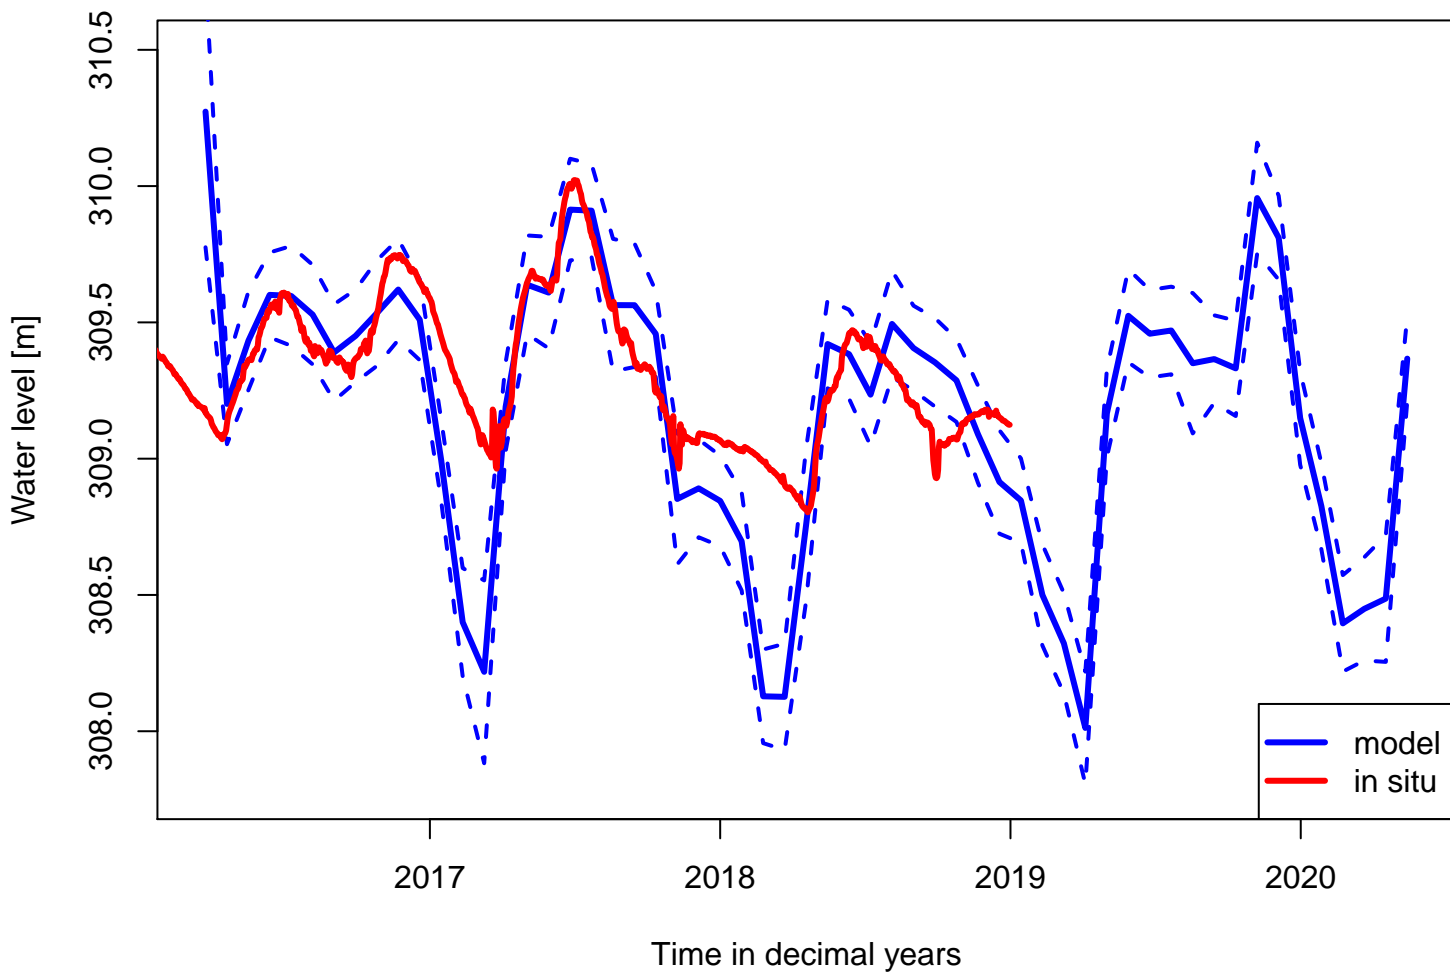

Supplement: s1 [file s1]

**lakename: lakeid: 548 lat: 54.62 lon: -97.79**

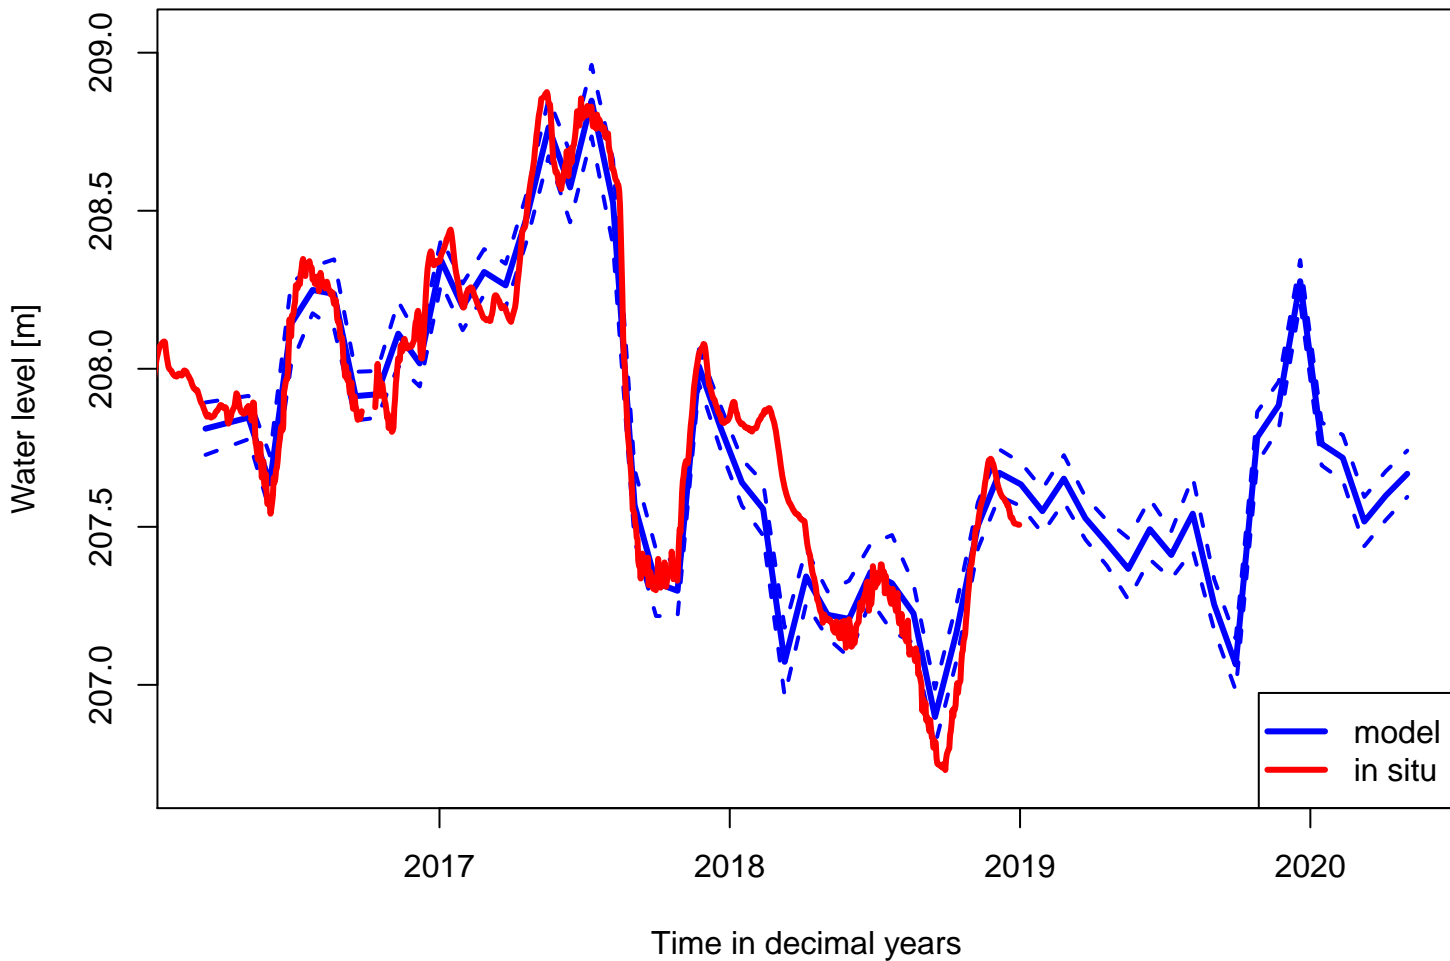

Supplement: s1 [file s1]

**lakename: Claire lakeid: 34 lat: 58.63 lon: -111.7**

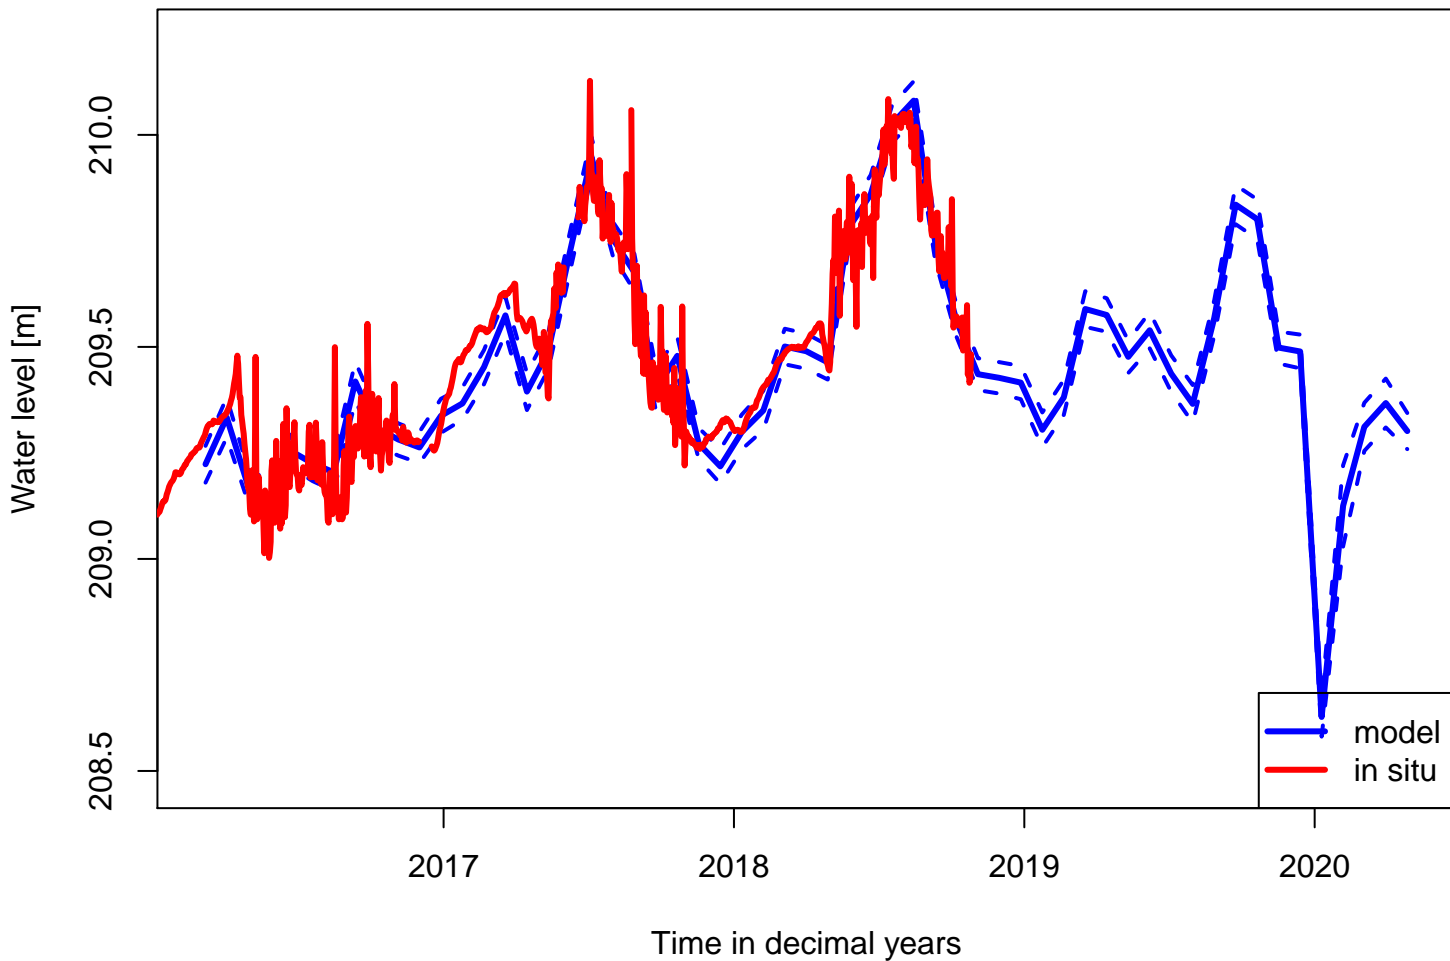

Supplement: s1 [file s1]

**lakename: Rainy lakeid: 710 lat: 48.7 lon: -92.96**

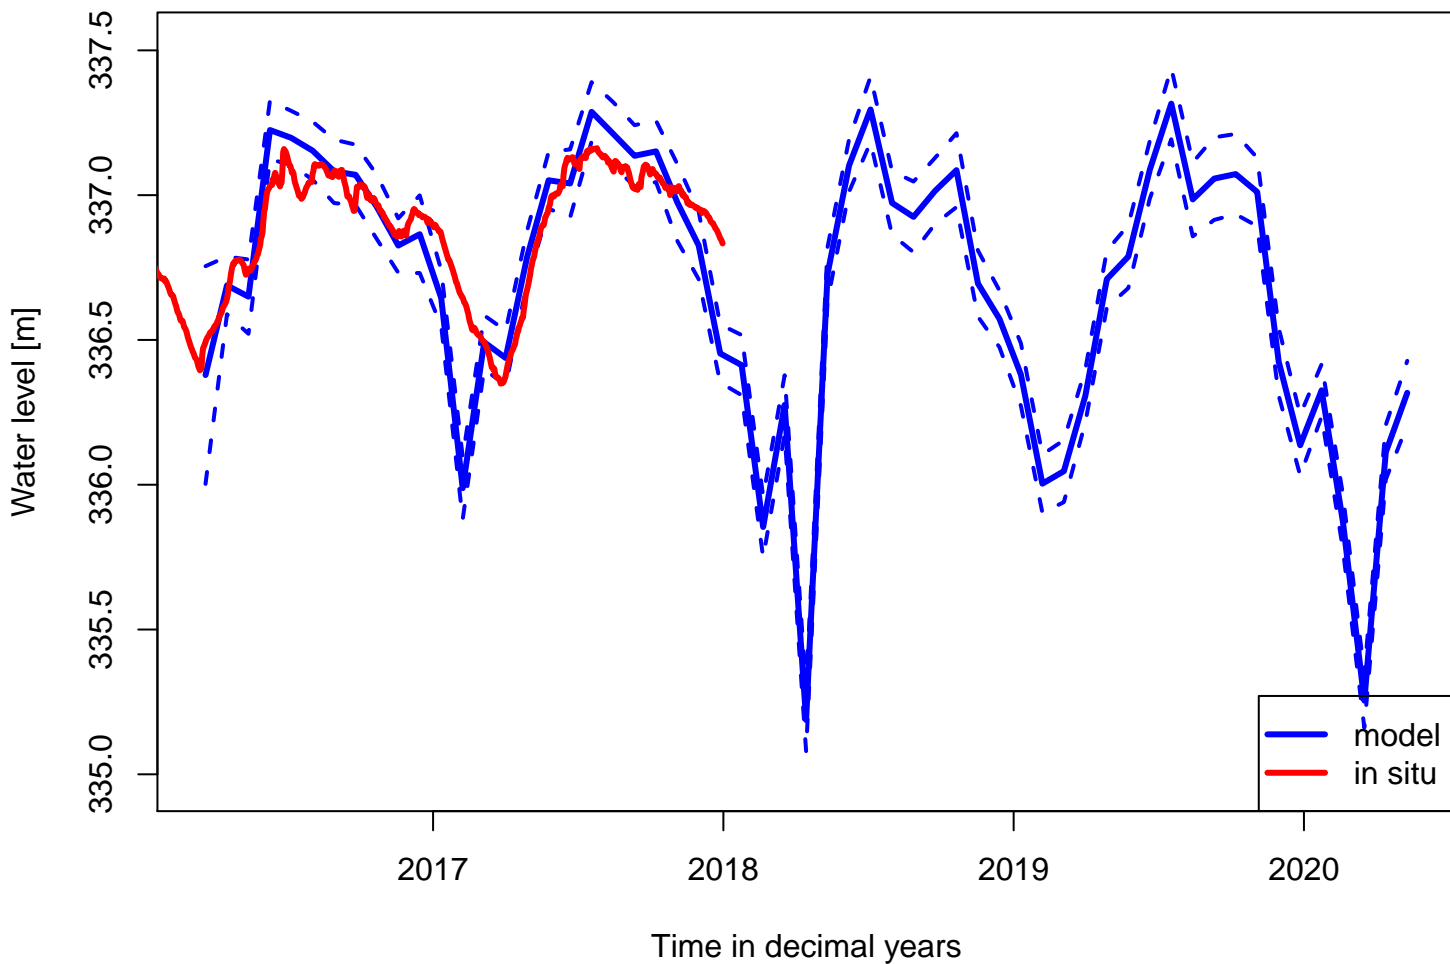

Supplement: s1 [file s1]

**lakename: Contwoyto lakeid: 22 lat: 65.78 lon: -111.2**

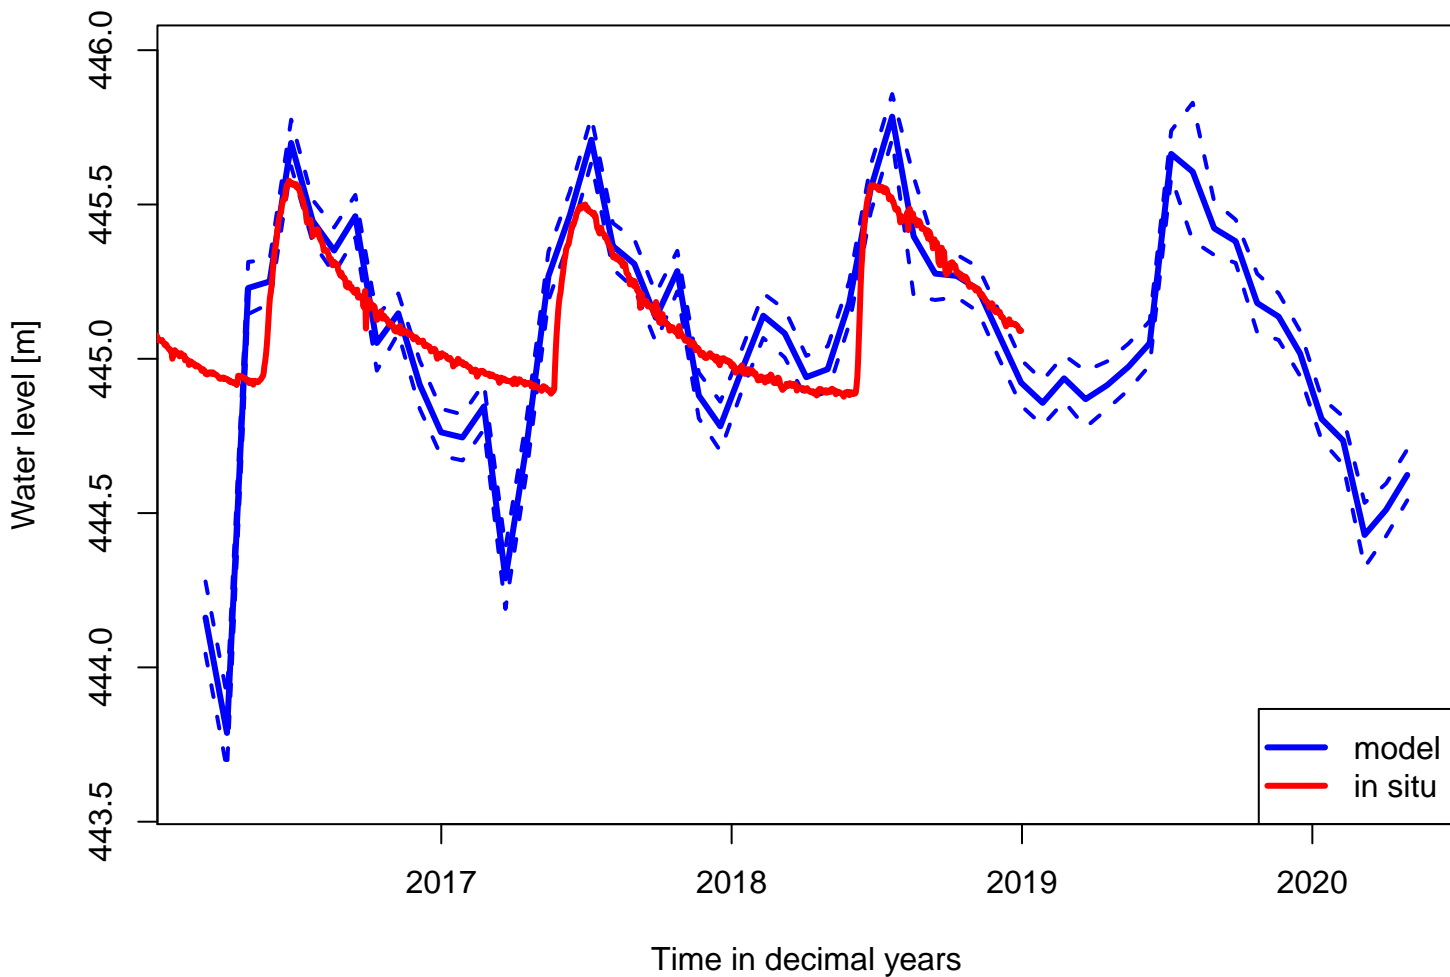

Supplement: s1 [file s1]

**lakename: Seul lakeid: 56 lat: 50.32 lon: -92.27**

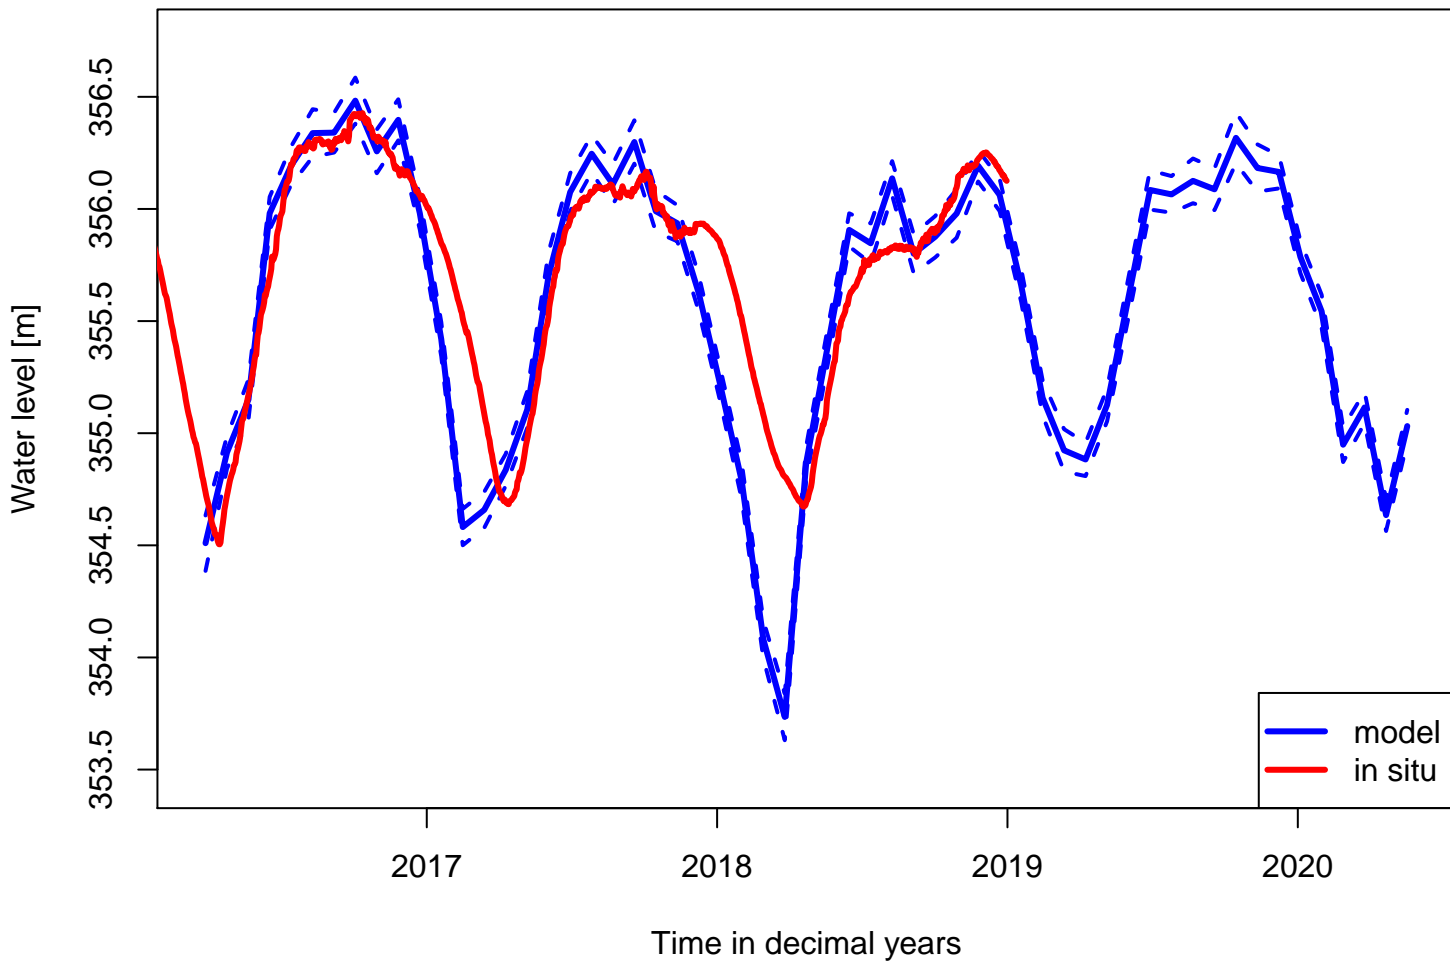

Supplement: s1 [file s1]

**lakename: Grand Lake lakeid: 8876 lat: 45.18 lon: -67.78**

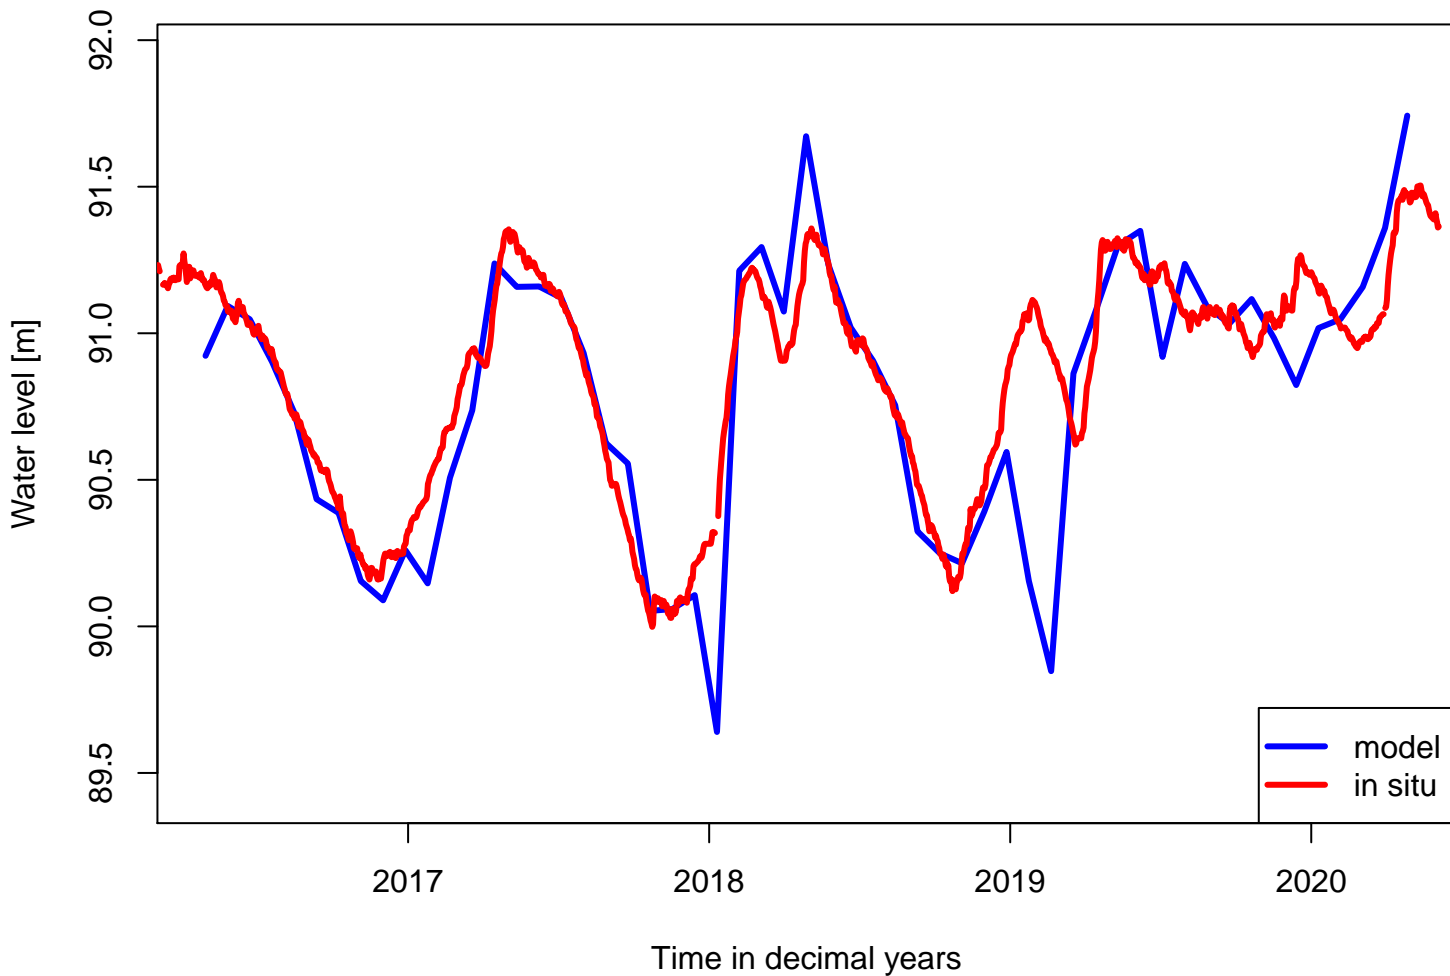

Supplement: s1 [file s1]

**lakename: Point lakeid: 278 lat: 65.4 lon: -114**

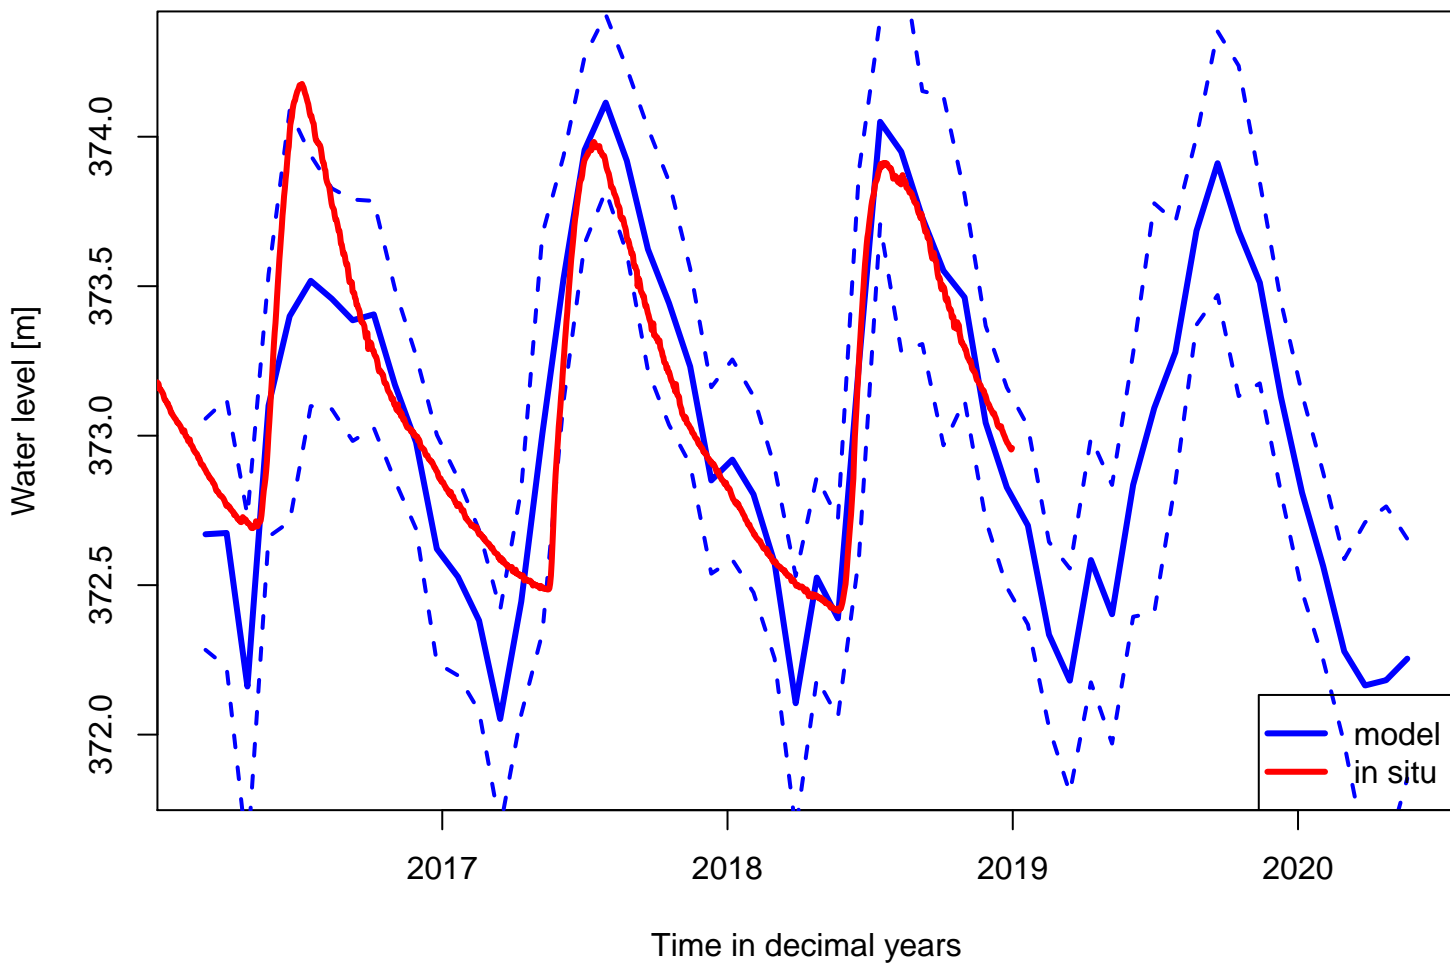

Supplement: s1 [file s1]

**lakename: Red lakeid: 650 lat: 51.03 lon: -93.86**

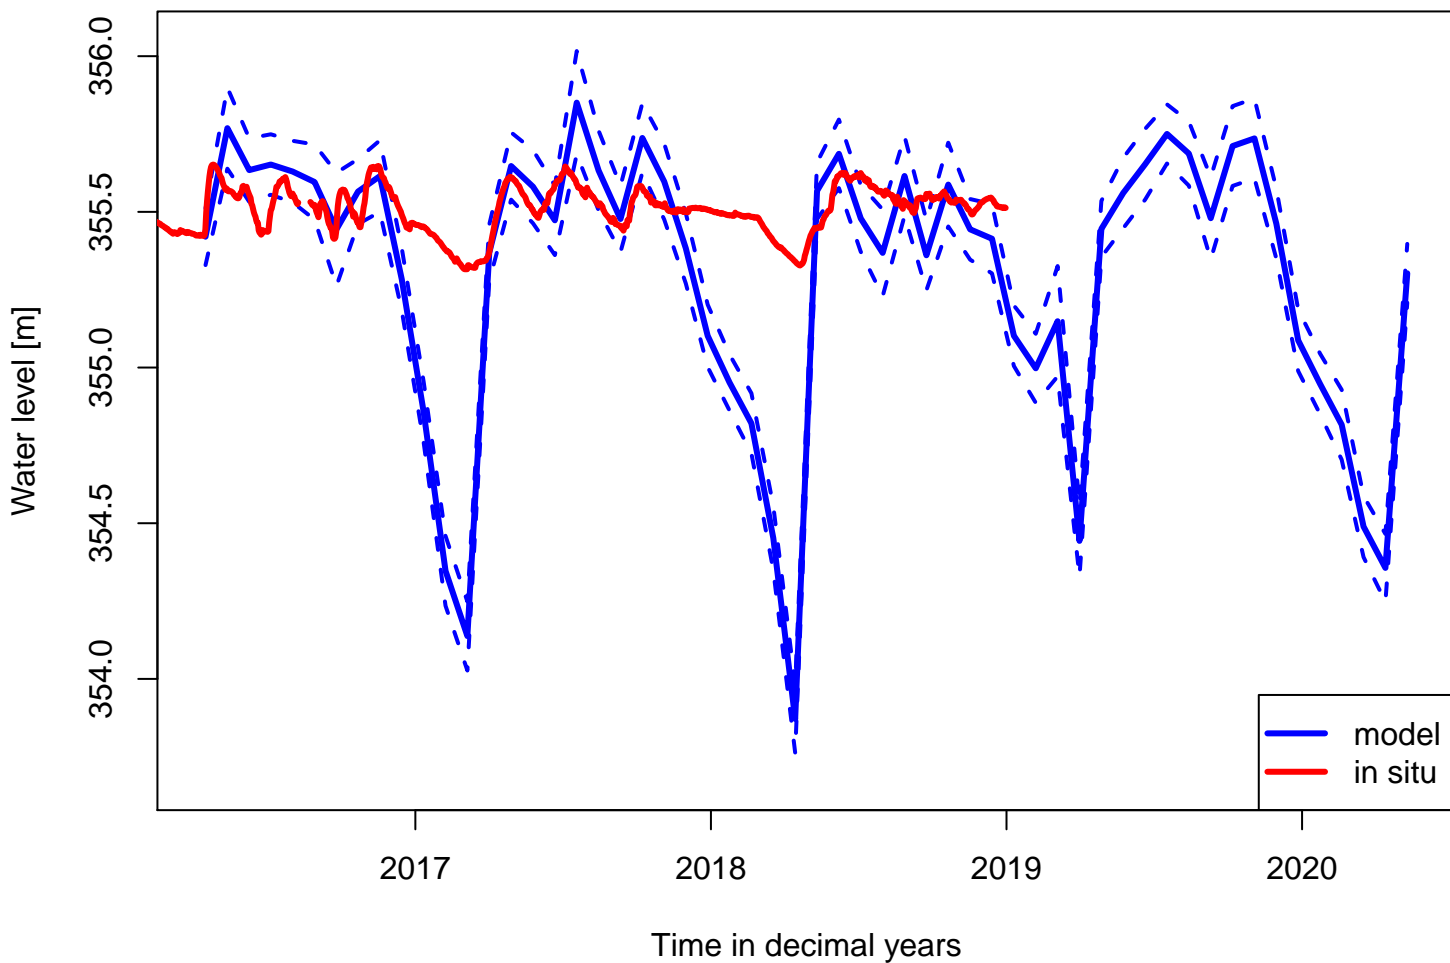

Supplement: s1 [file s1]

**lakename: Woods lakeid: 57 lat: 49.77 lon: -94.5**

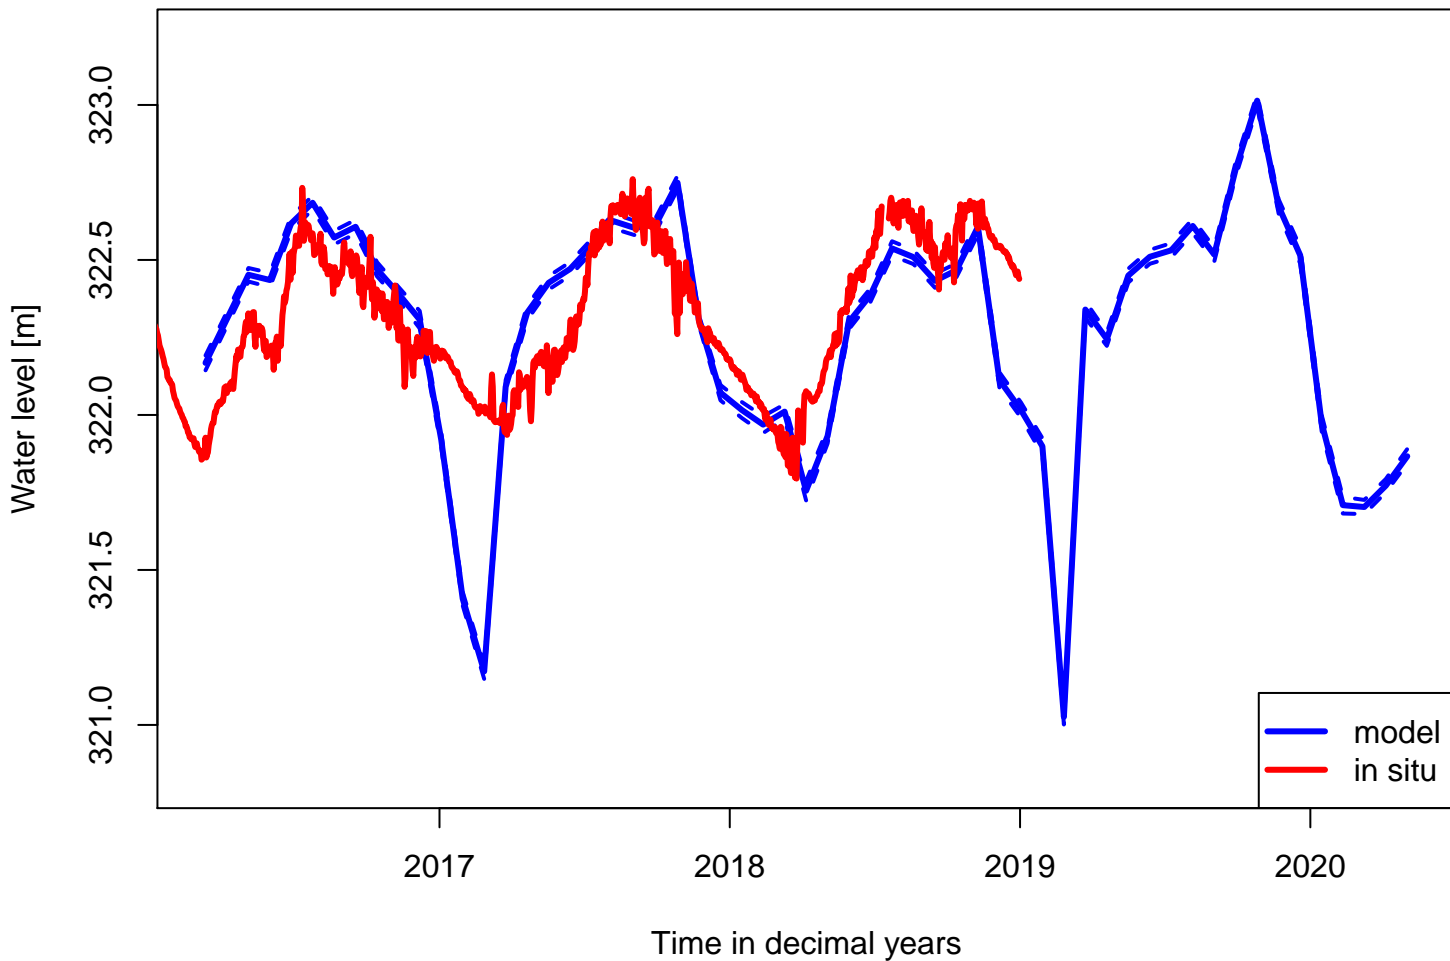

Supplement: s1 [file s1]

**lakename: Muskoka lakeid: 757 lat: 45.07 lon: -79.49**

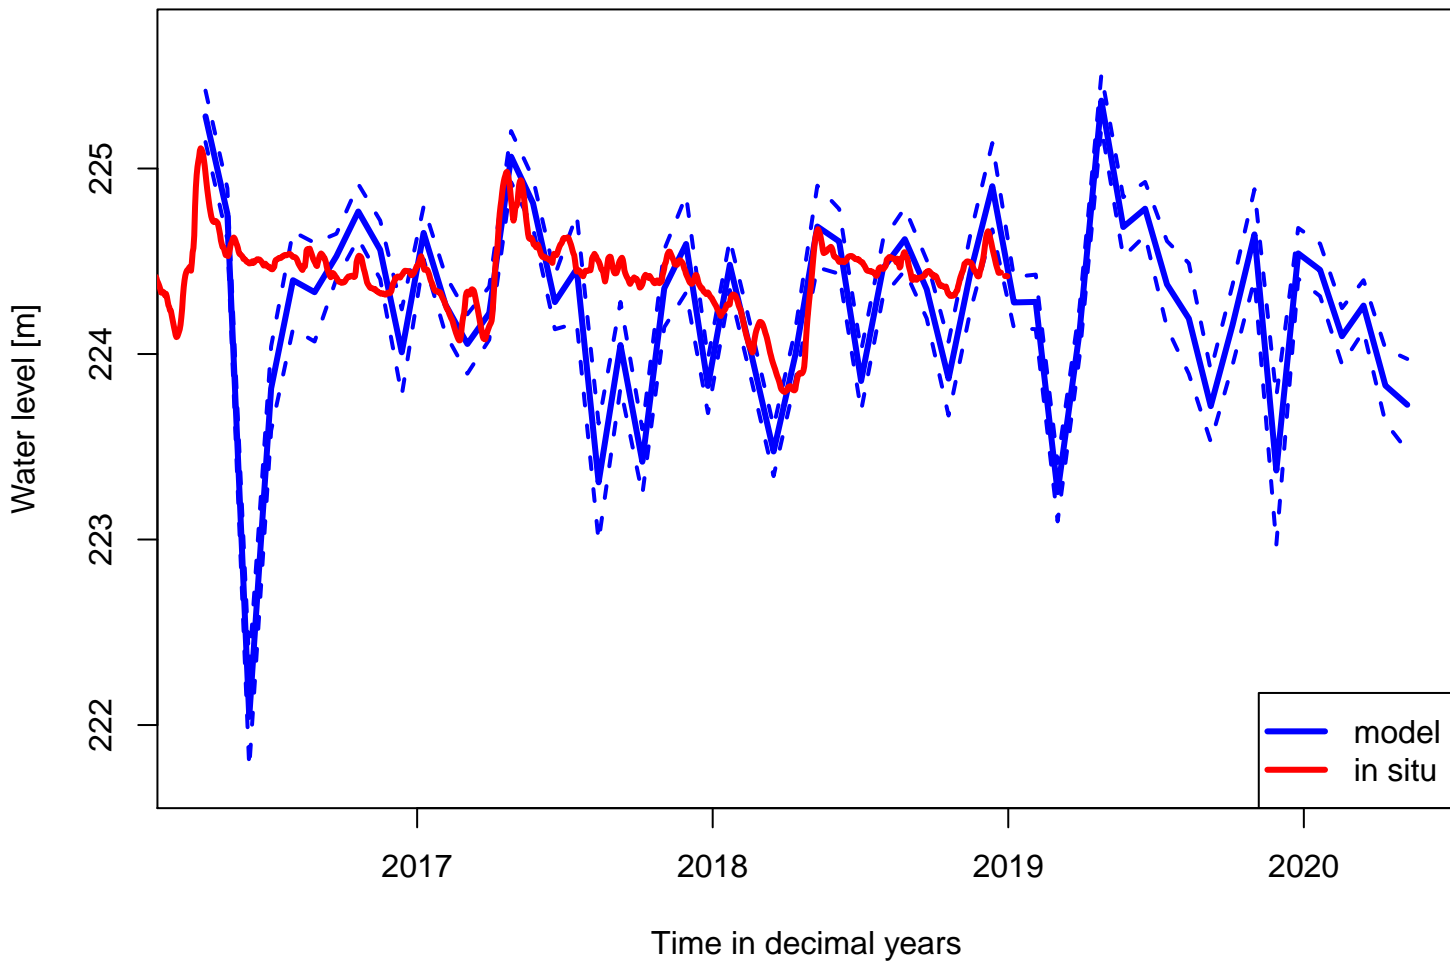

Supplement: s1 [file s1]

**lakename: Delarondo lakeid: 575 lat: 53.89 lon: -106.9**

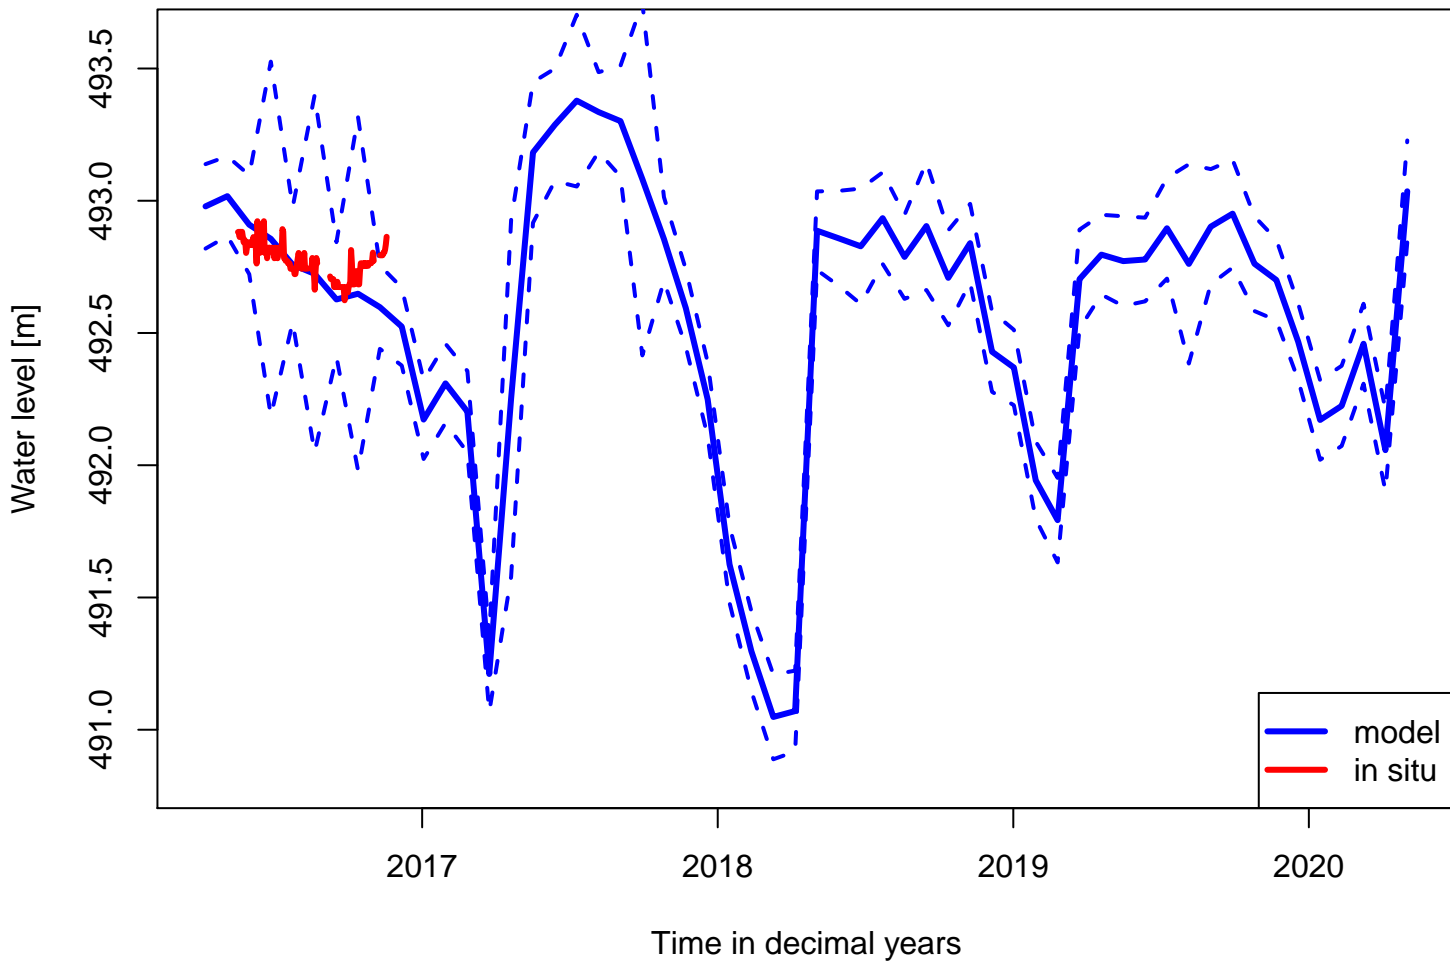

Supplement: s1 [file s1]

**lakename: Nechako Reservoir lakeid: 591 lat: 53.65 lon: -127.5**

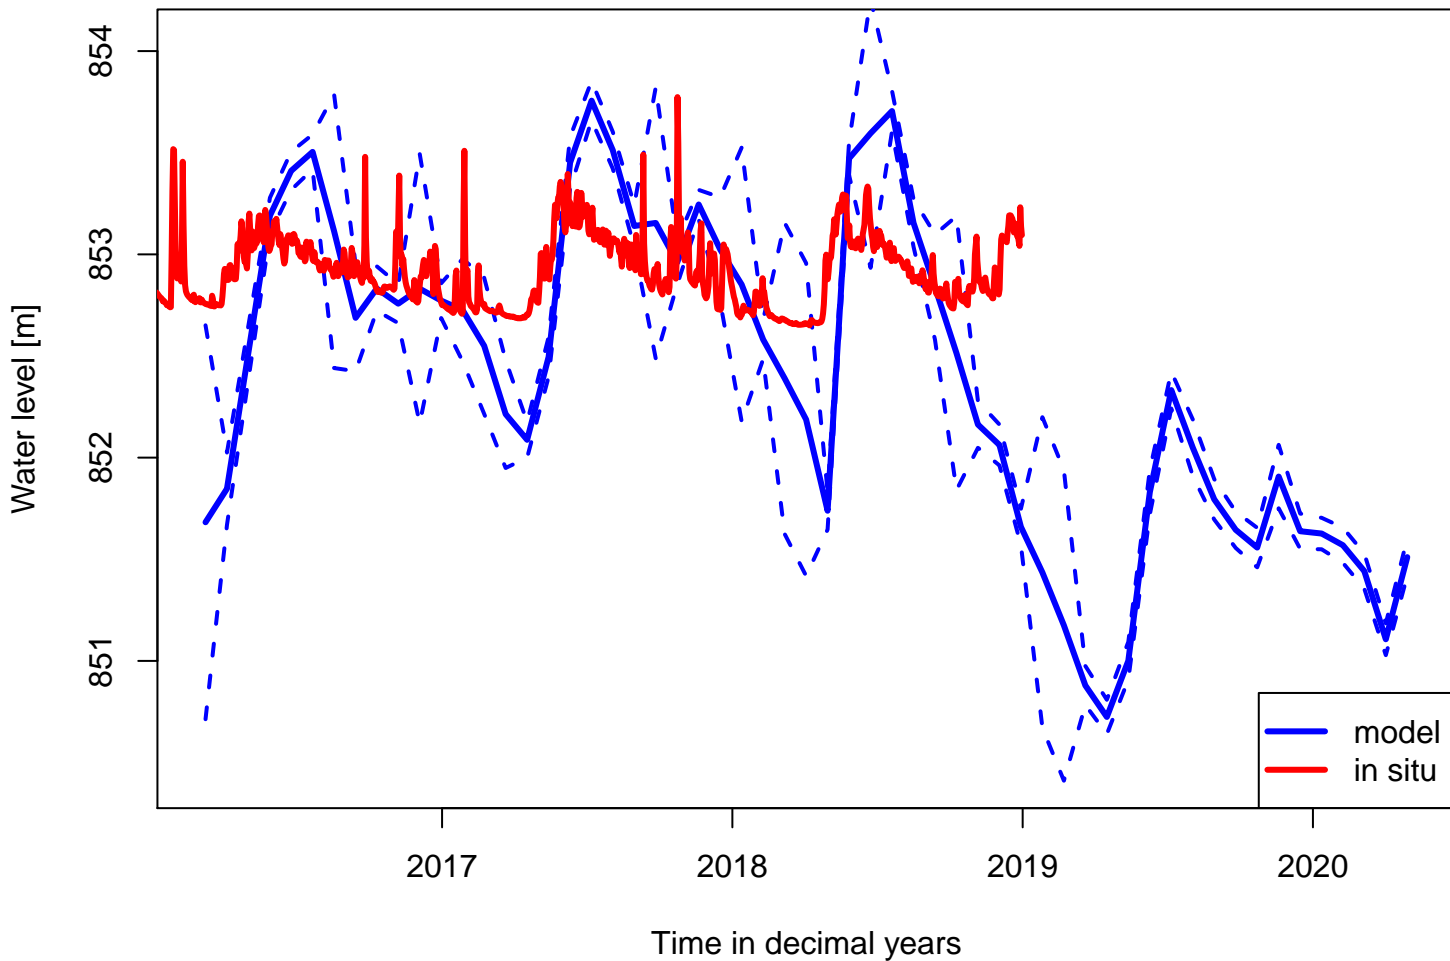

Supplement: s1 [file s1]

**lakename: Wollaston lakeid: 32 lat: 58.48 lon: -103.3**

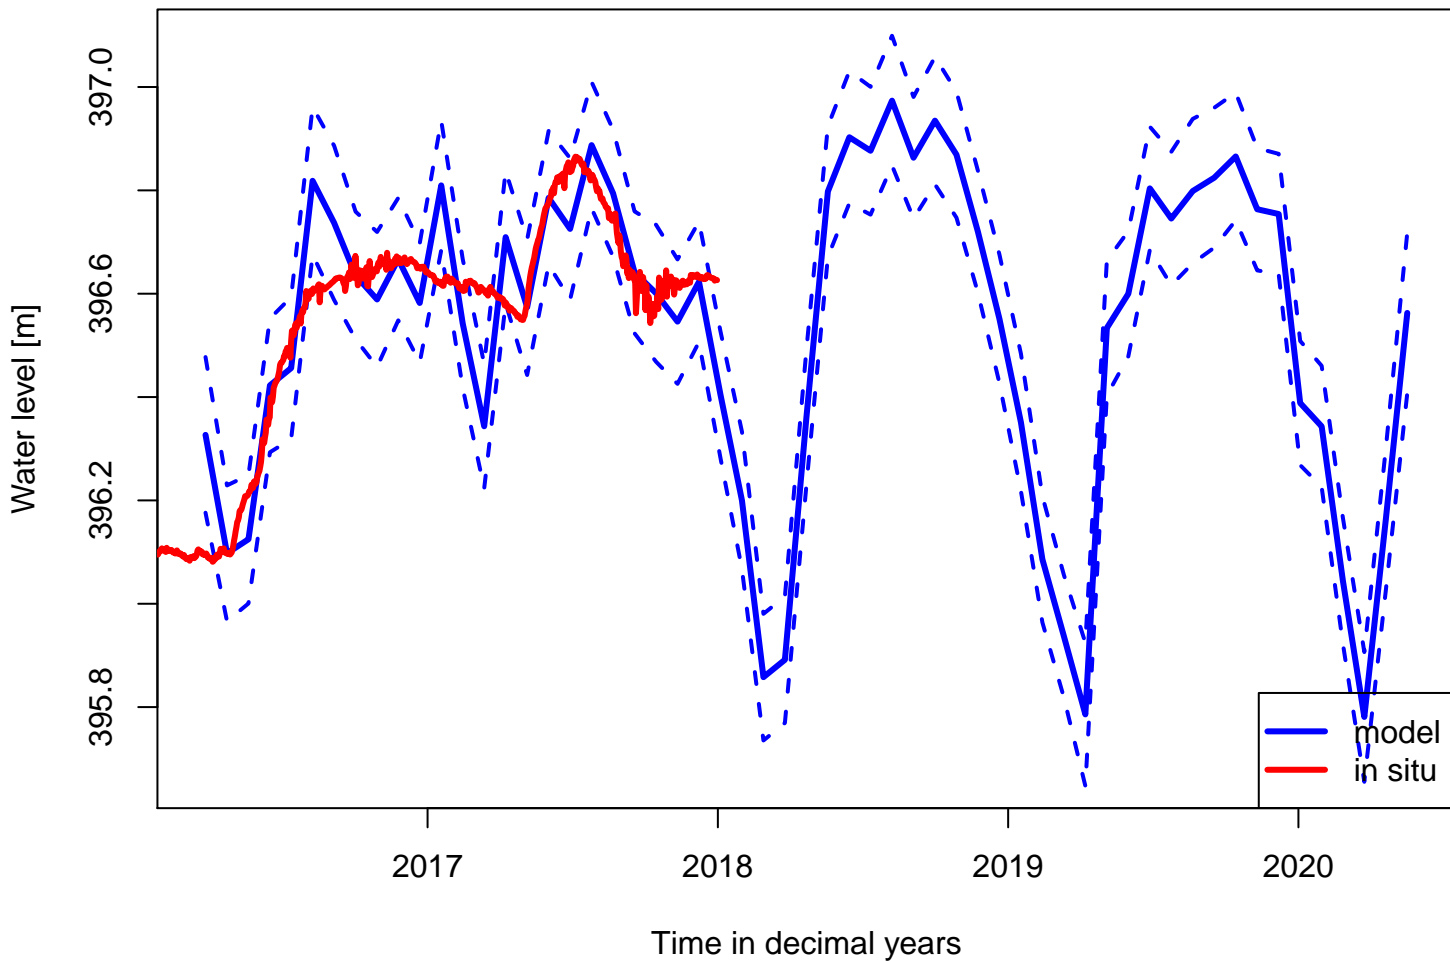

Supplement: s1 [file s1]

**lakename: Nechako Reservoir lakeid: 591 lat: 53.65 lon: -127.5**

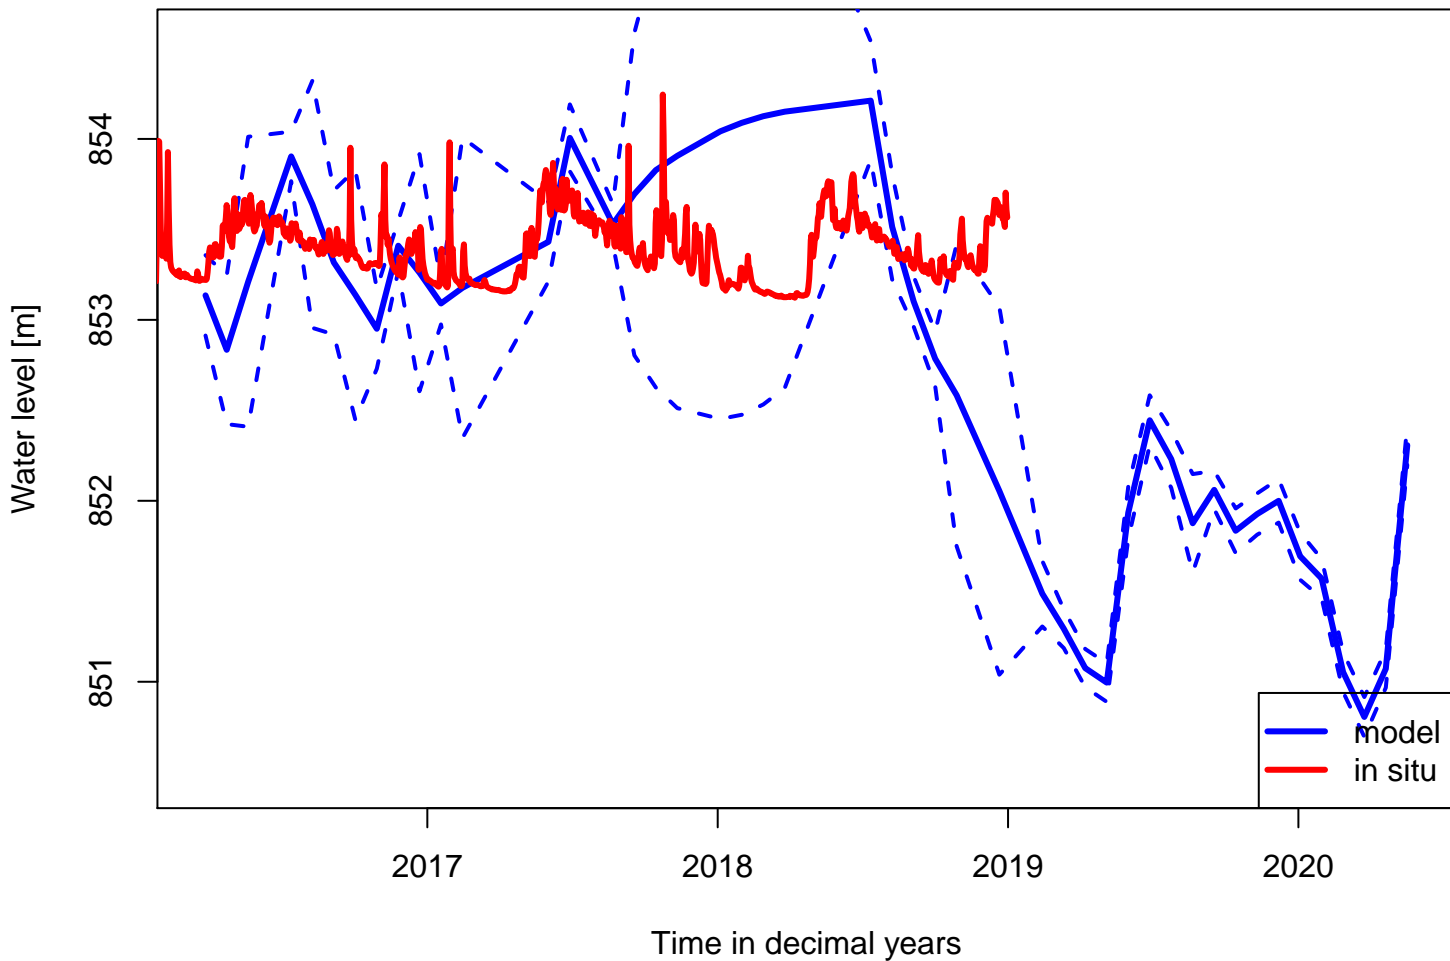

Supplement: s1 [file s1]

**lakename: lakeid: 478 lat: 56.34 lon: -101.4**

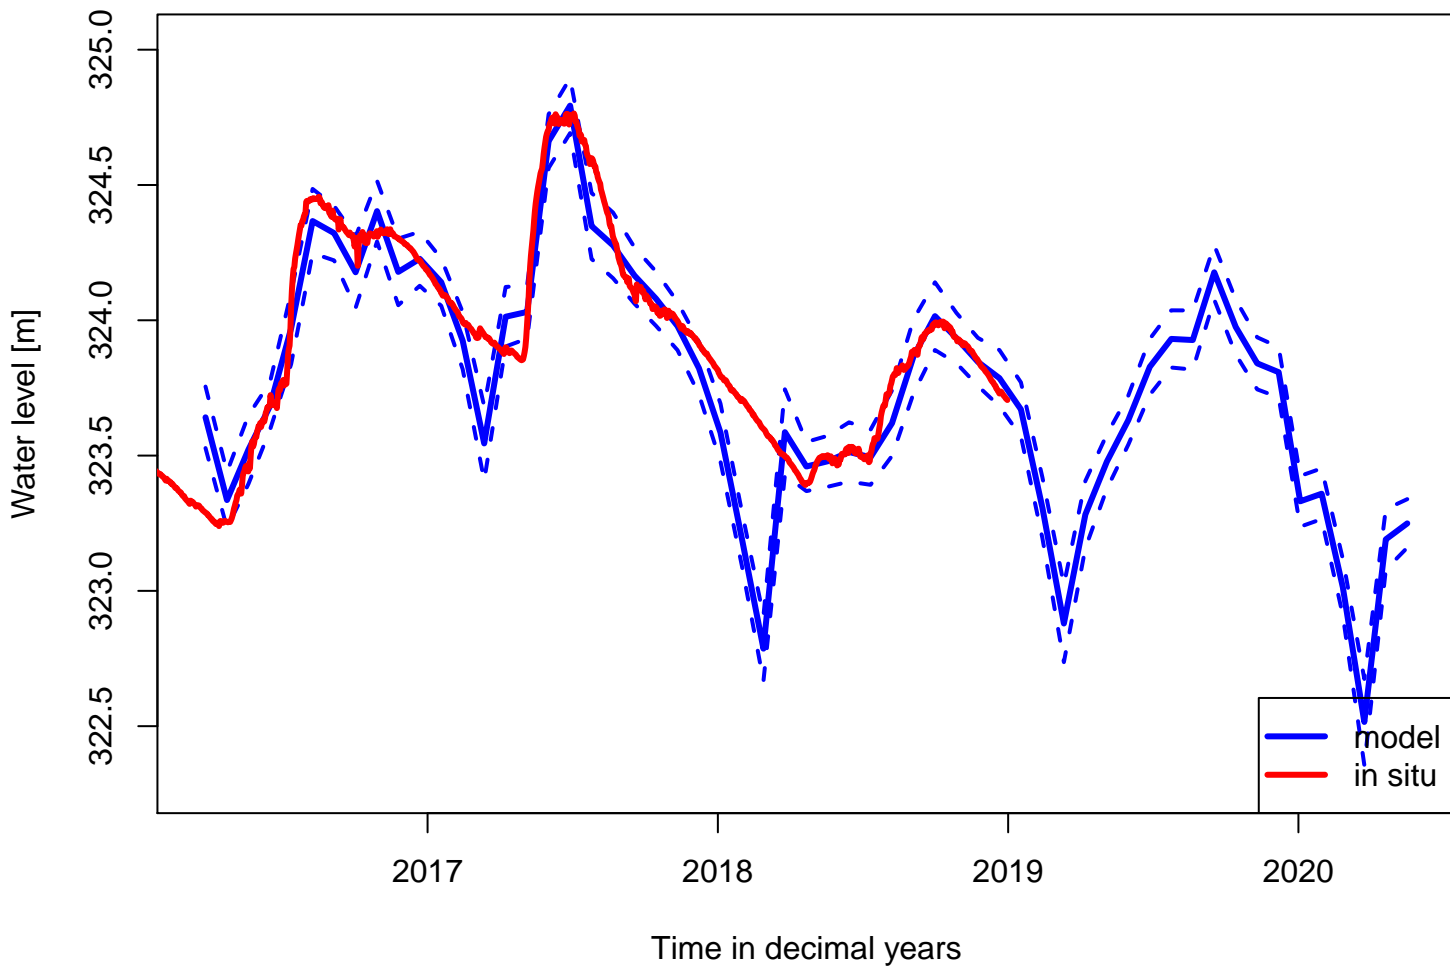

Supplement: s1 [file s1]

**lakename: Diefenbaker lakeid: 643 lat: 51.28 lon: -106.8**

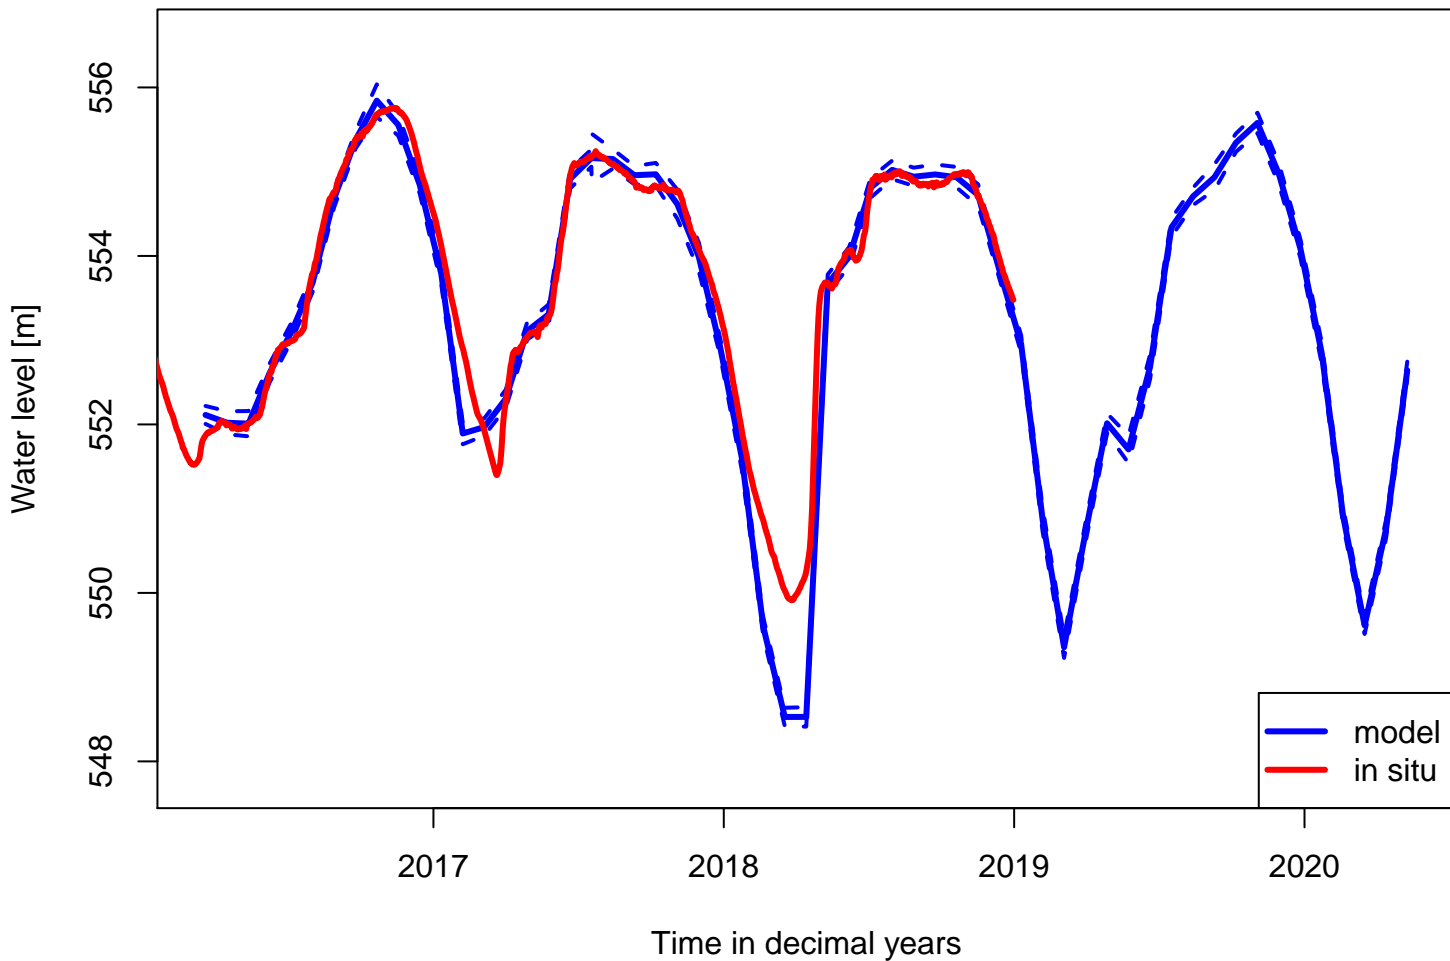

Supplement: s1 [file s1]

**lakename: Claire lakeid: 34 lat: 58.63 lon: -111.7**

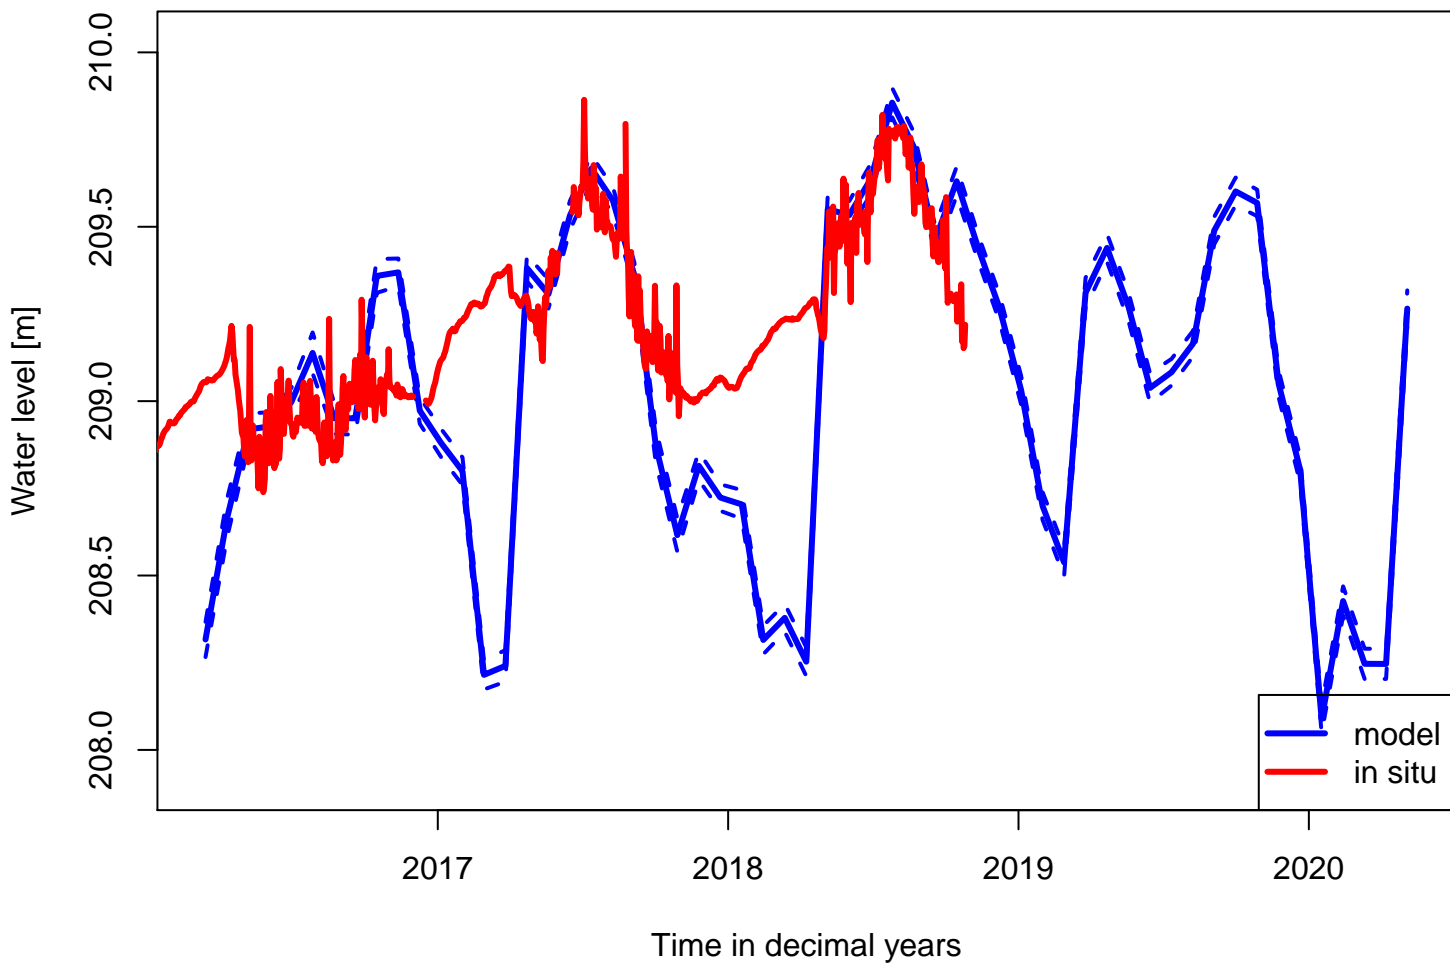

Supplement: s1 [file s1]

**lakename: Ile-a-la-Crosse lakeid: 493 lat: 55.92 lon: -107.7**

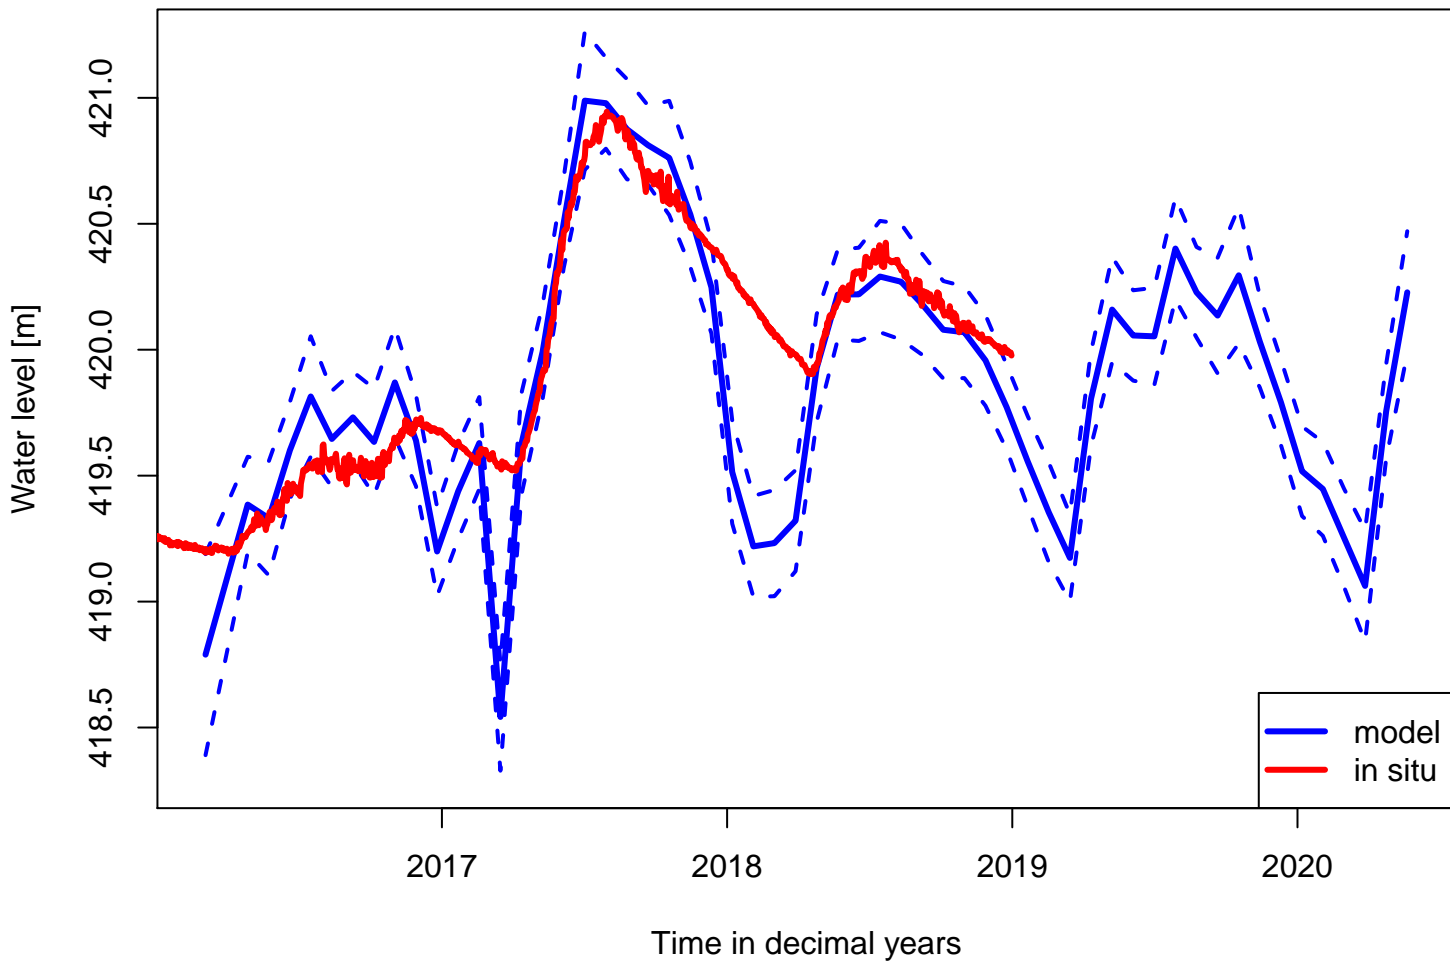

Supplement: s1 [file s1]

**lakename: Southern Indian lakeid: 37 lat: 56.69 lon: -99.02**

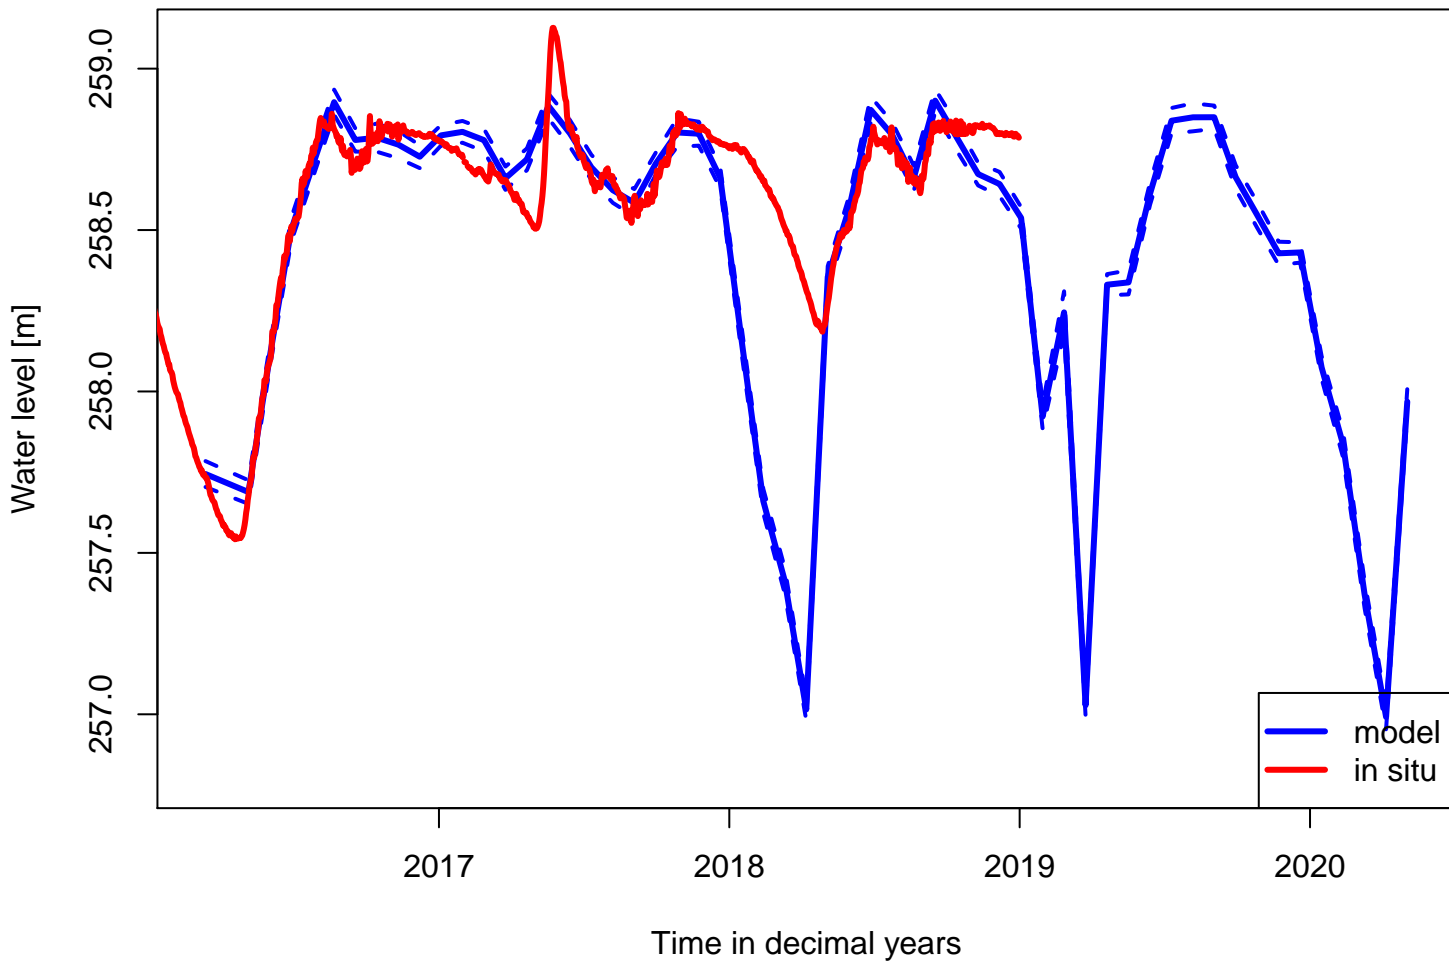

Supplement: s1 [file s1]

**lakename: Point lakeid: 278 lat: 65.4 lon: -114**

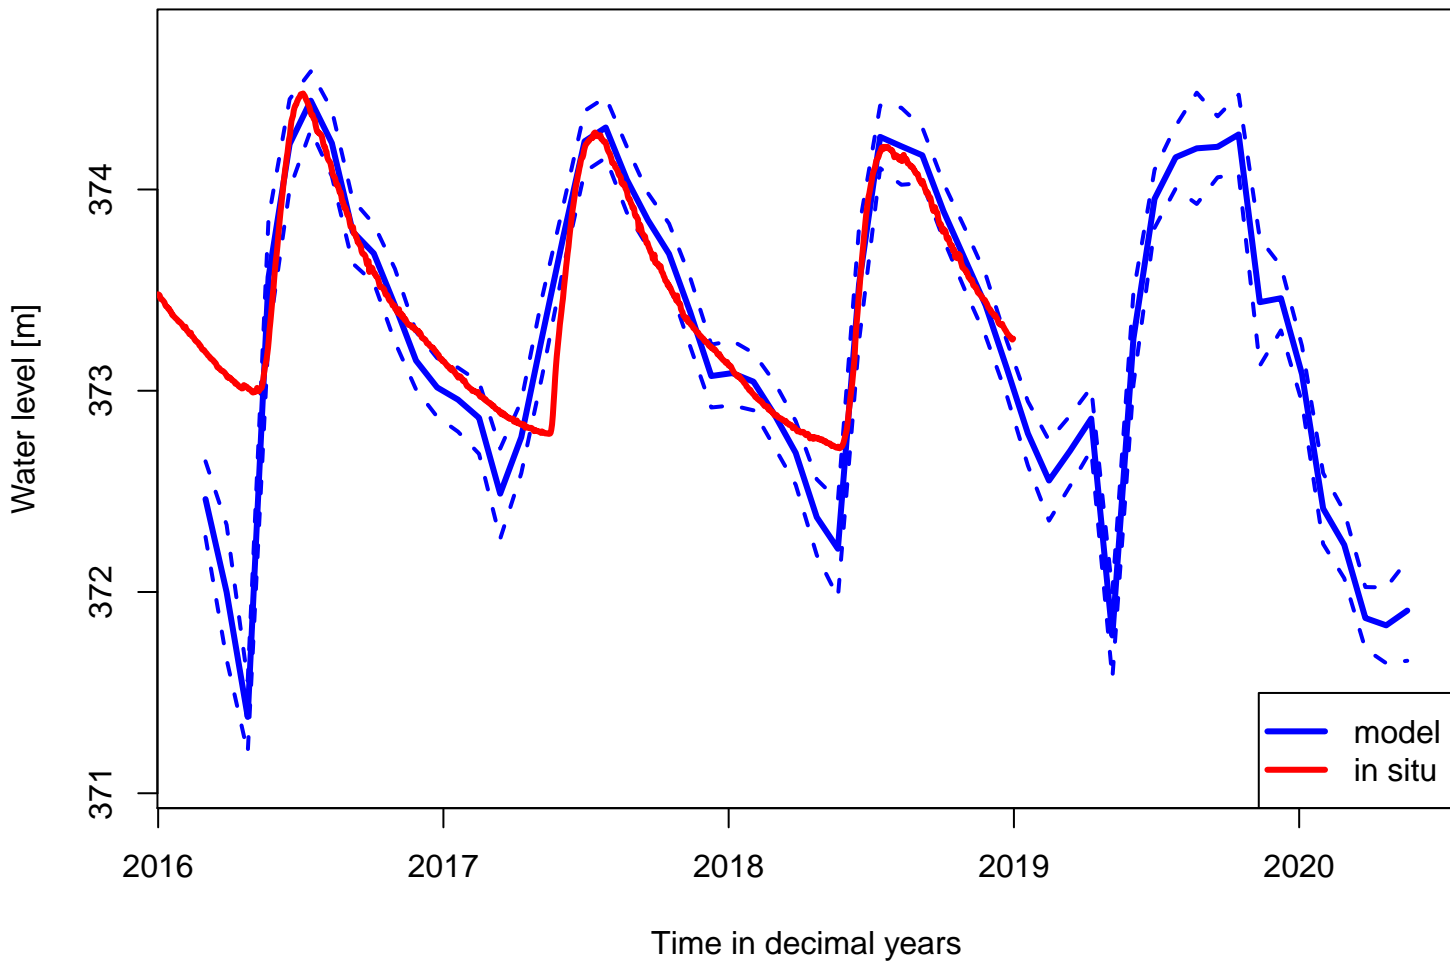

Supplement: s1 [file s1]

**lakename: Nipissing lakeid: 745 lat: 46.13 lon: -80.01**

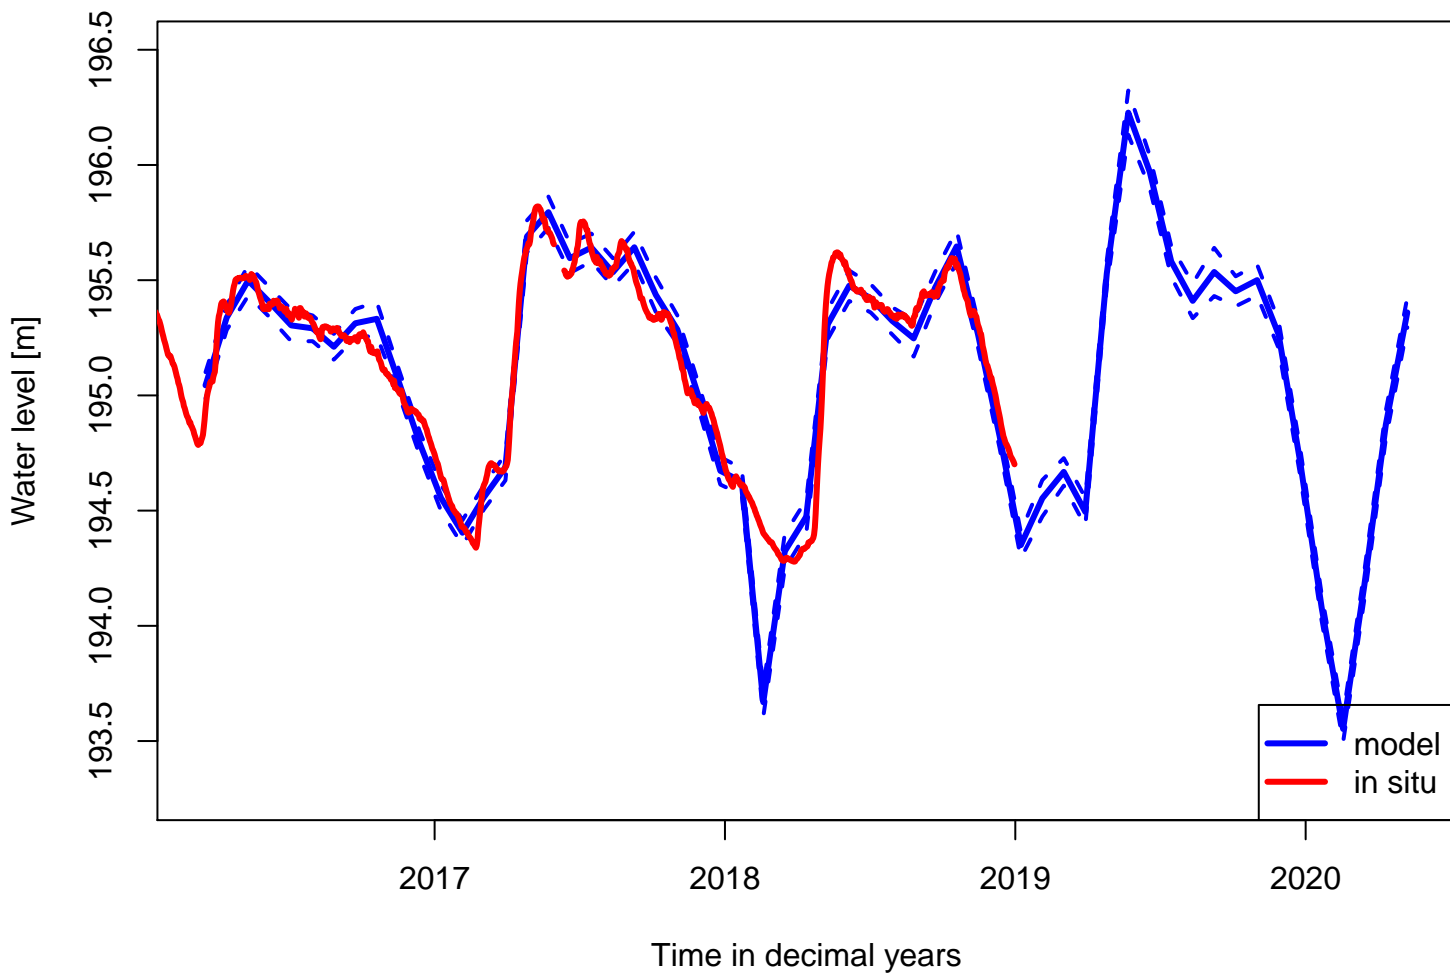

Supplement: s1 [file s1]

**lakename: Great Salt lakeid: 67 lat: 41.26 lon: -112.5**

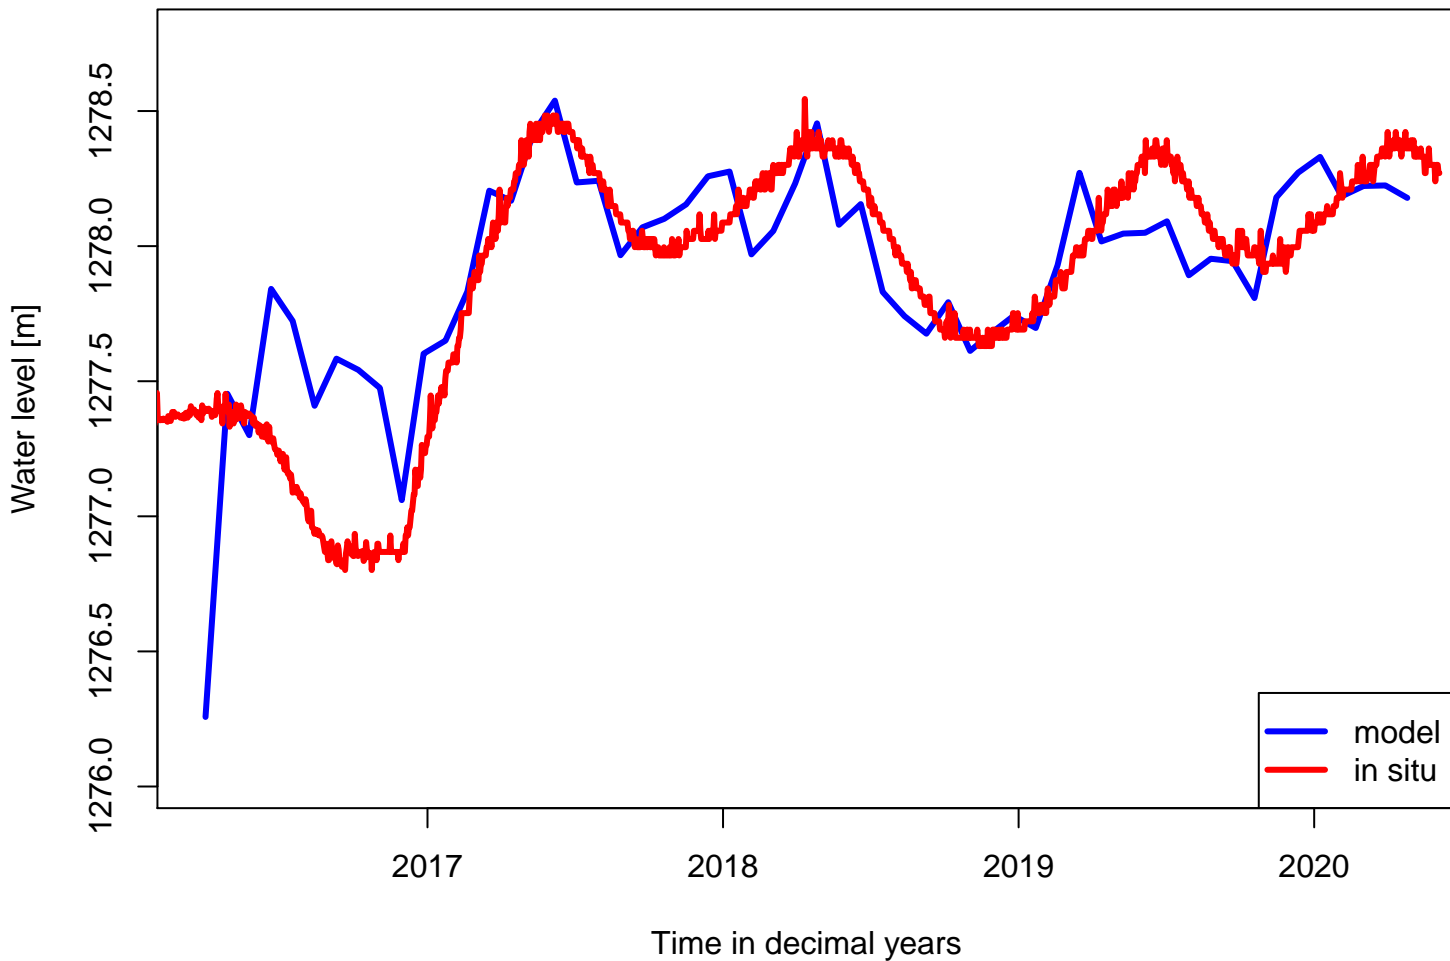

Supplement: s1 [file s1]

**lakename: Split lakeid: 479 lat: 56.24 lon: -96.09**

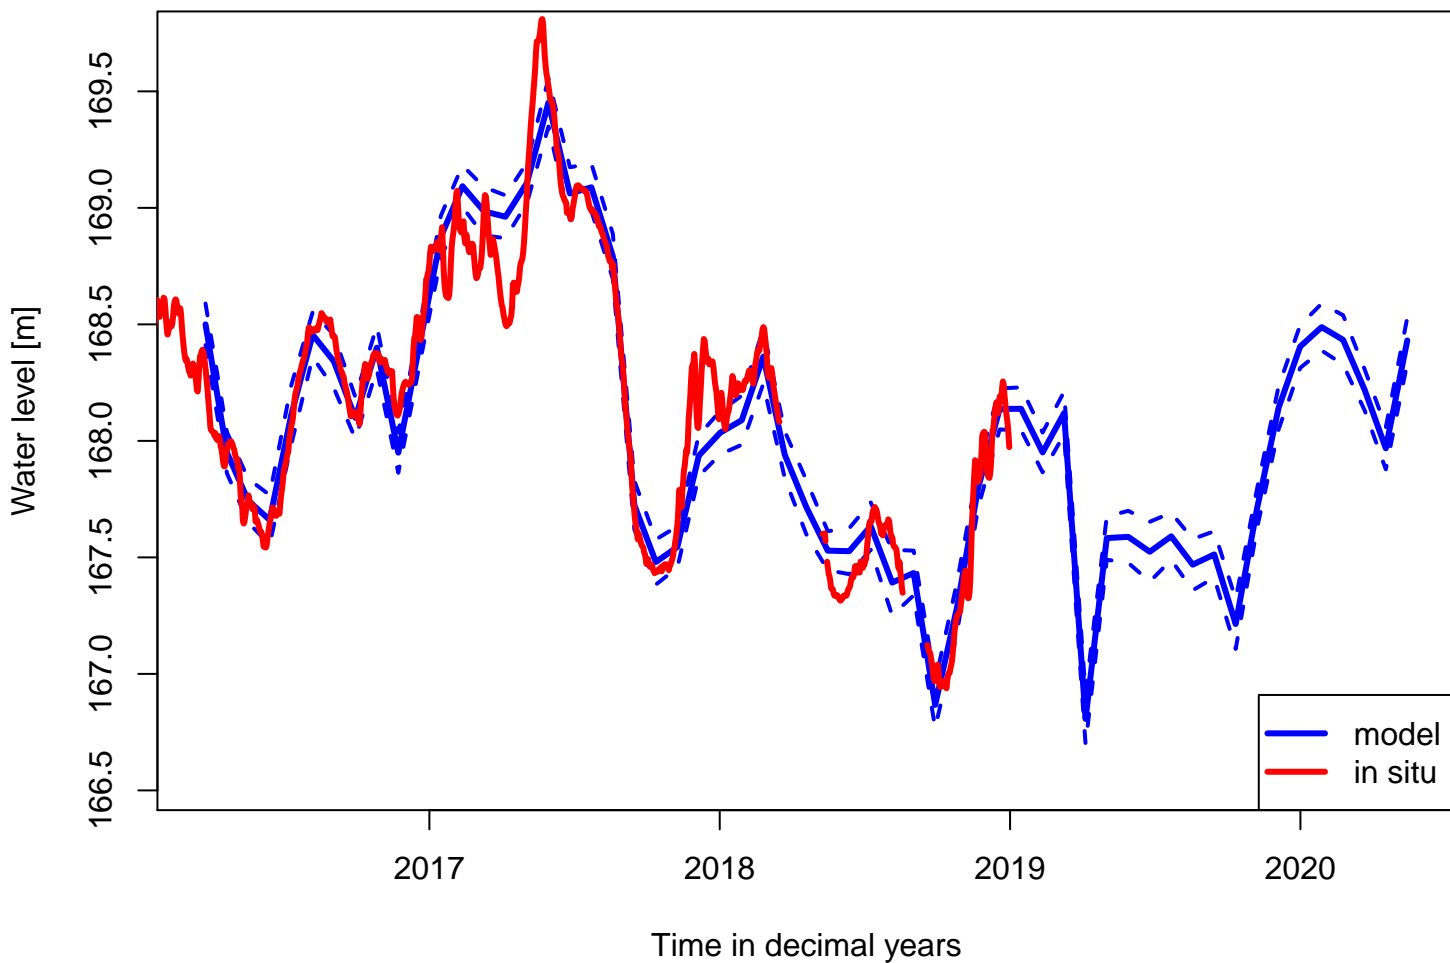

Supplement: s1 [file s1]

**lakename: Southern Indian lakeid: 37 lat: 56.69 lon: -99.02**

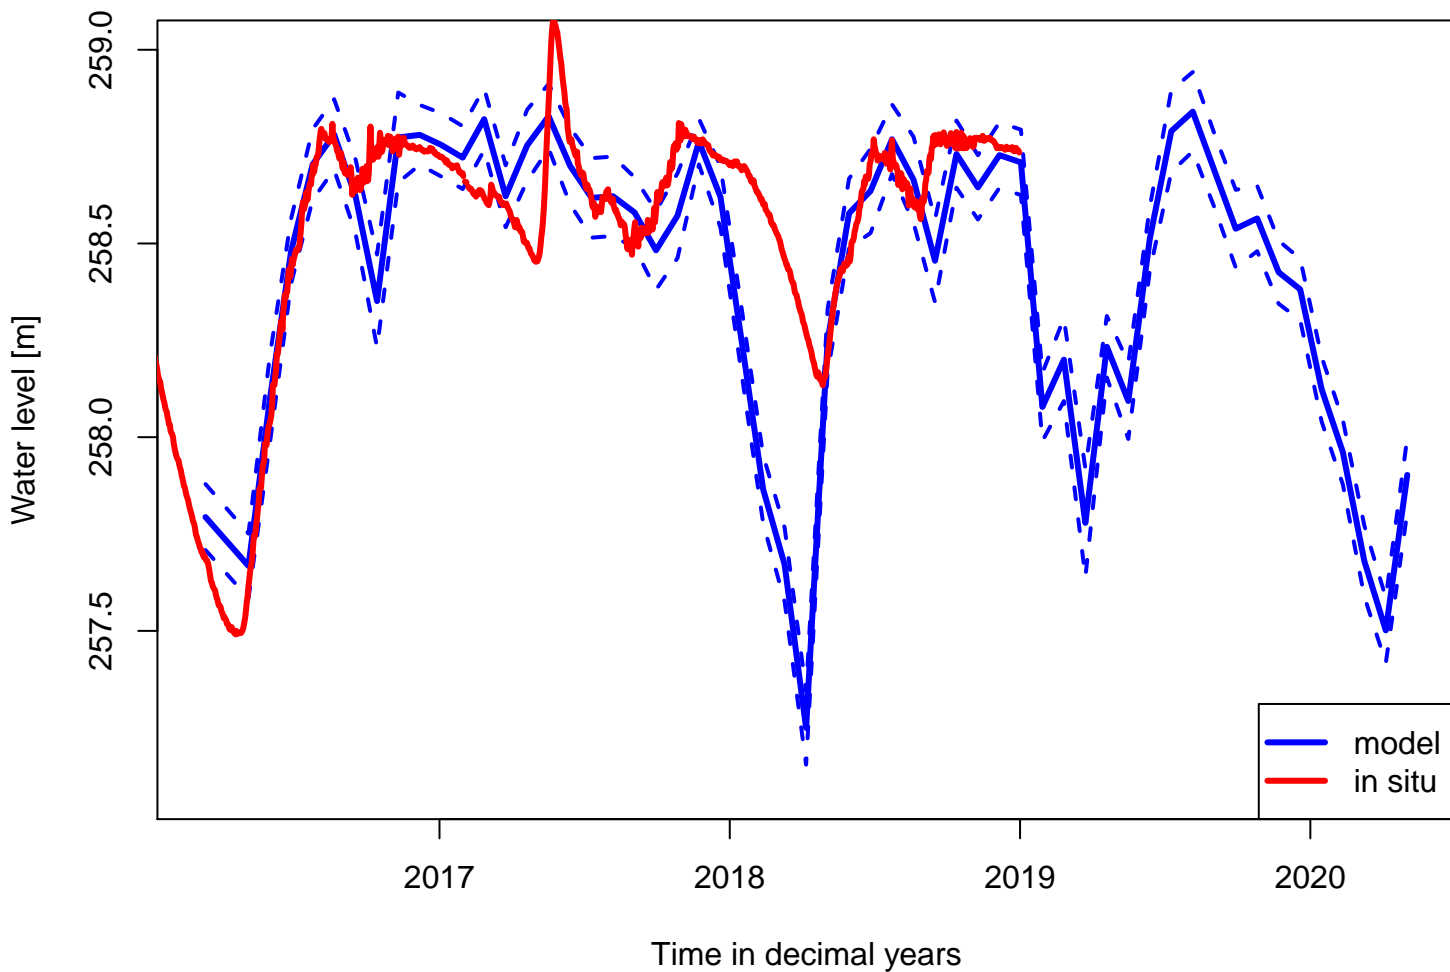

Supplement: s1 [file s1]

**lakename: Ennadai lakeid: 370 lat: 61.11 lon: -101**

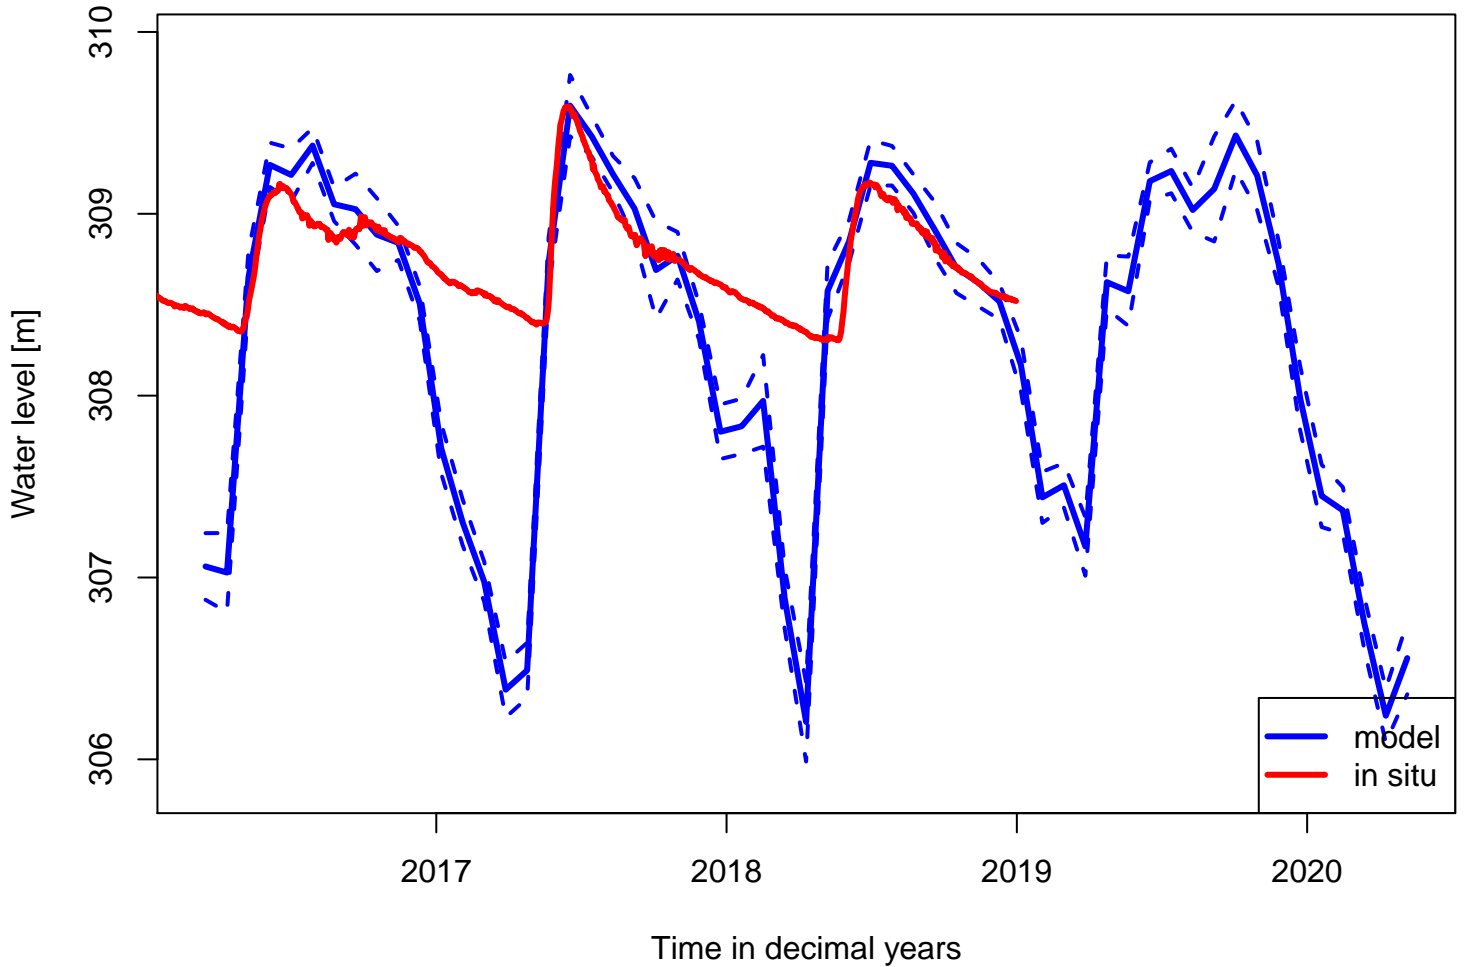

Supplement: s1 [file s1]

**lakename: Franklin D. Roosevelt lakeid: 724 lat: 47.96 lon: -119**

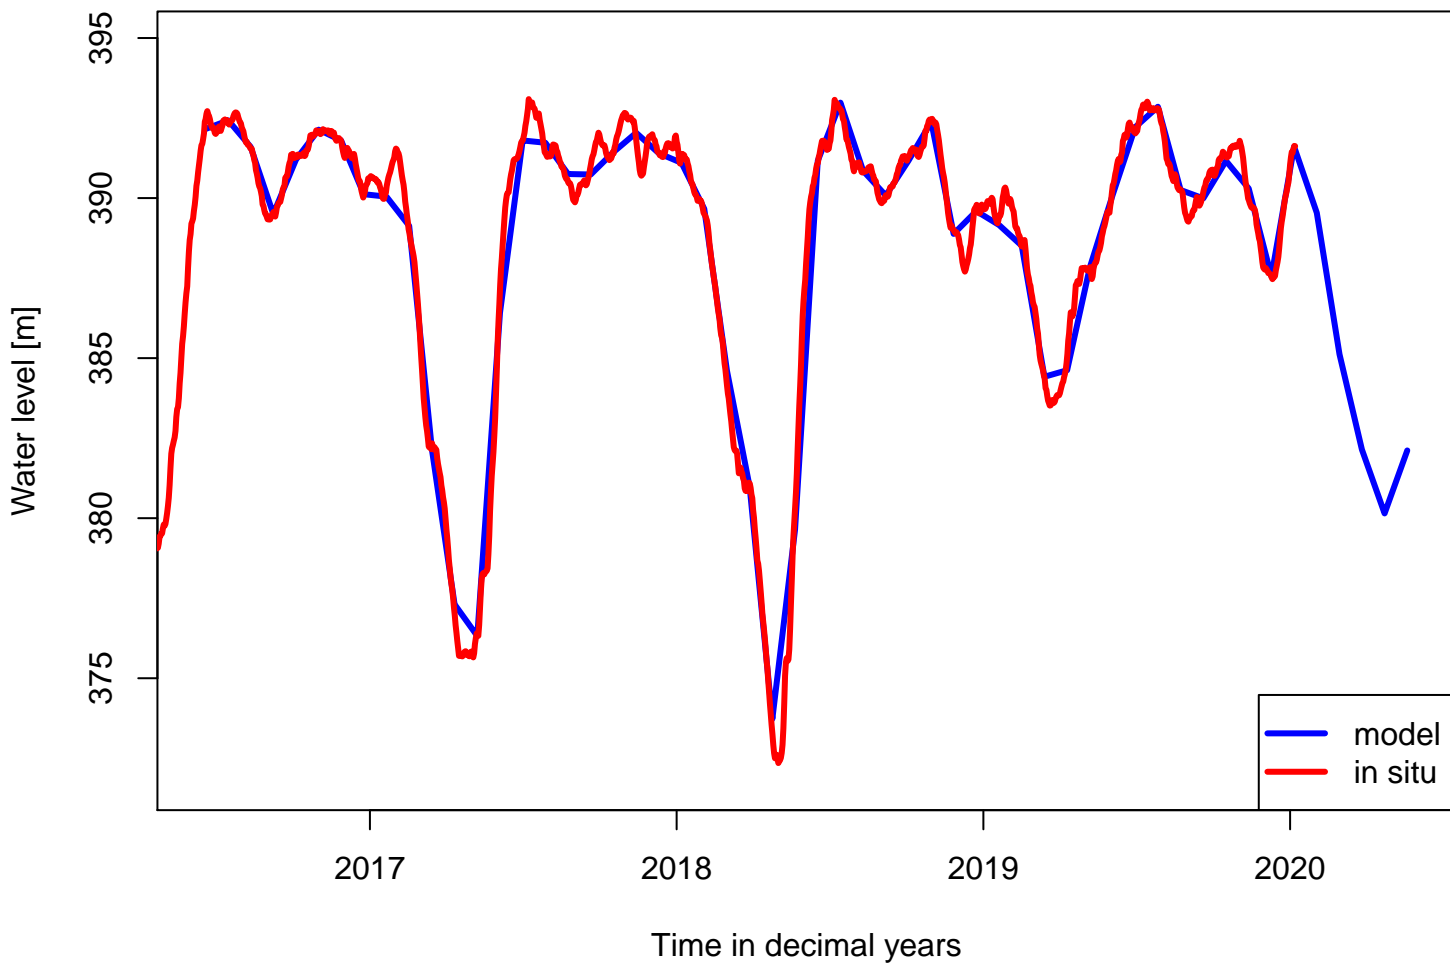

Supplement: s1 [file s1]

**lakename: Lake Mohave lakeid: 9360 lat: 35.2 lon: -114.6**

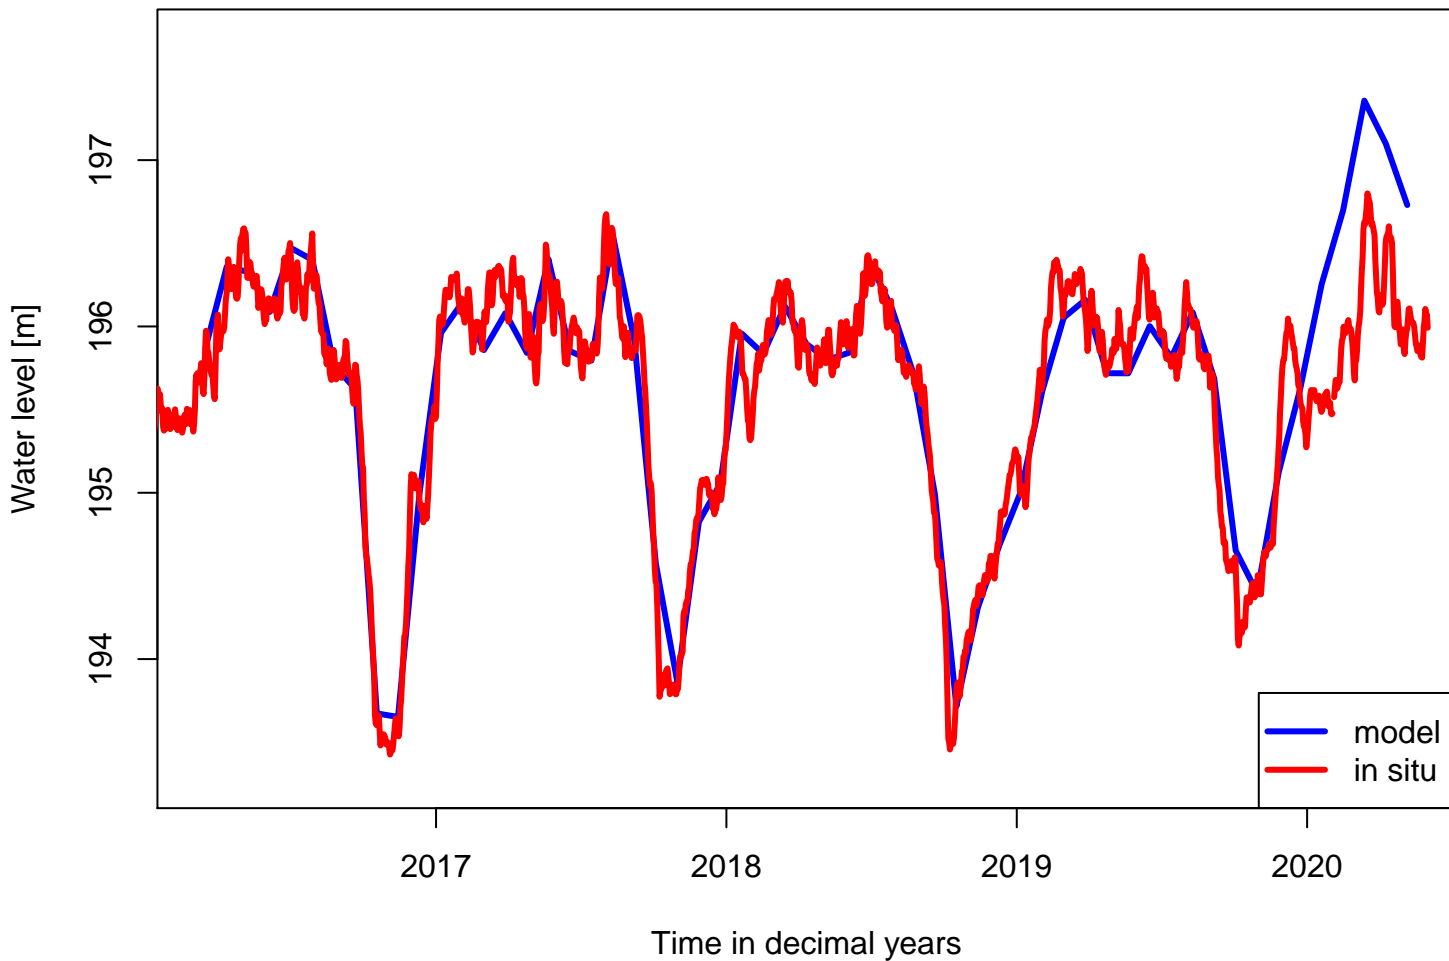

Supplement: s1 [file s1]

**lakename: lakeid: 6579 lat: 54.12 lon: -127.4**

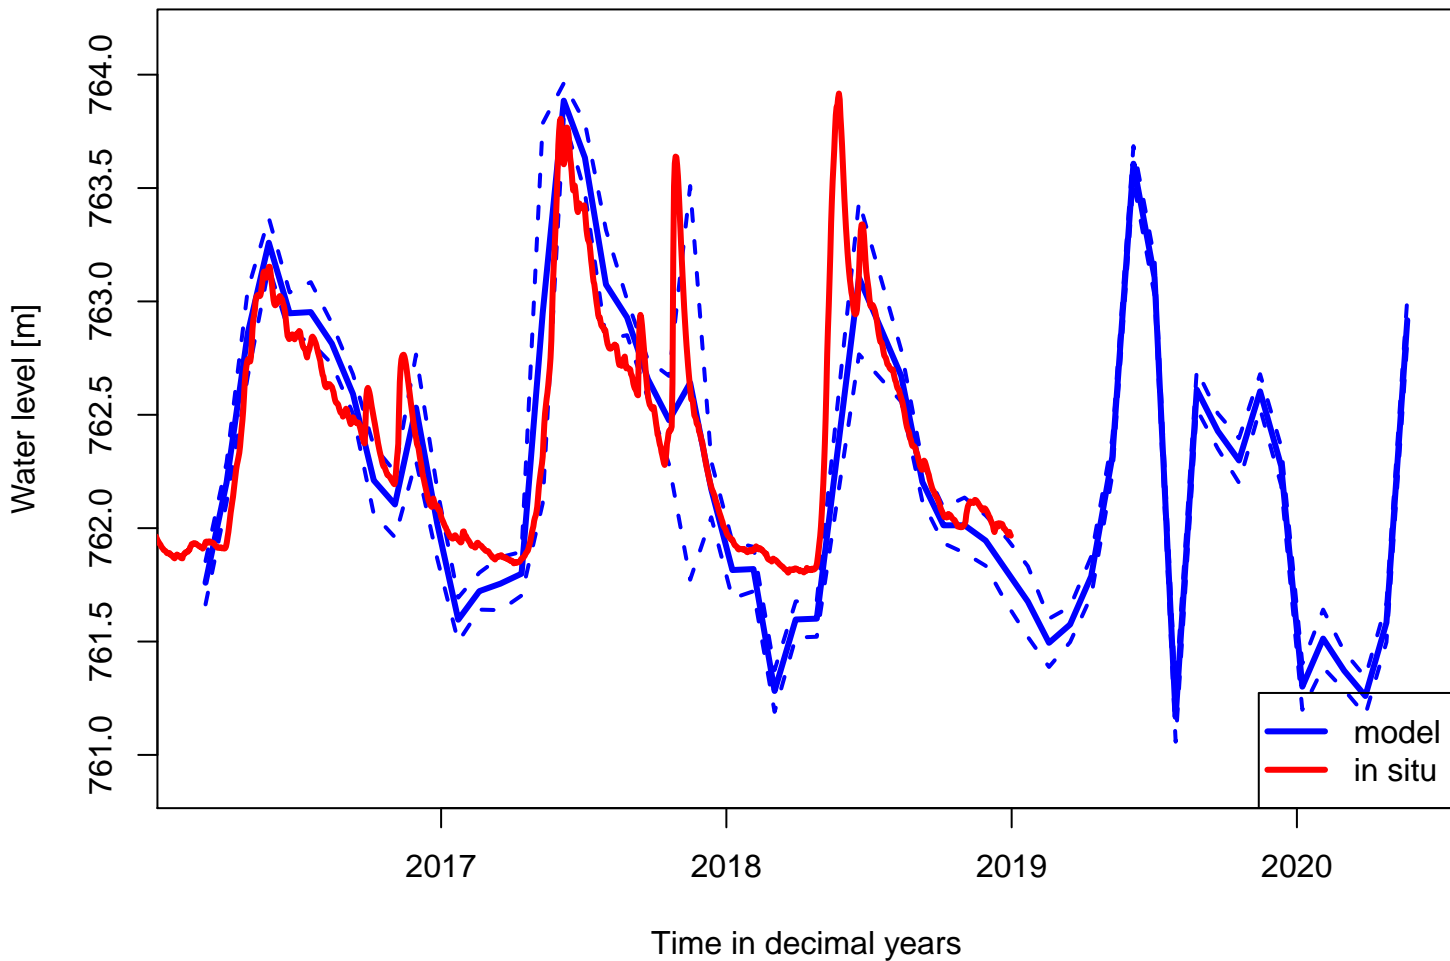

Supplement: s1 [file s1]

**lakename: Contwoyto lakeid: 22 lat: 65.78 lon: -111.2**

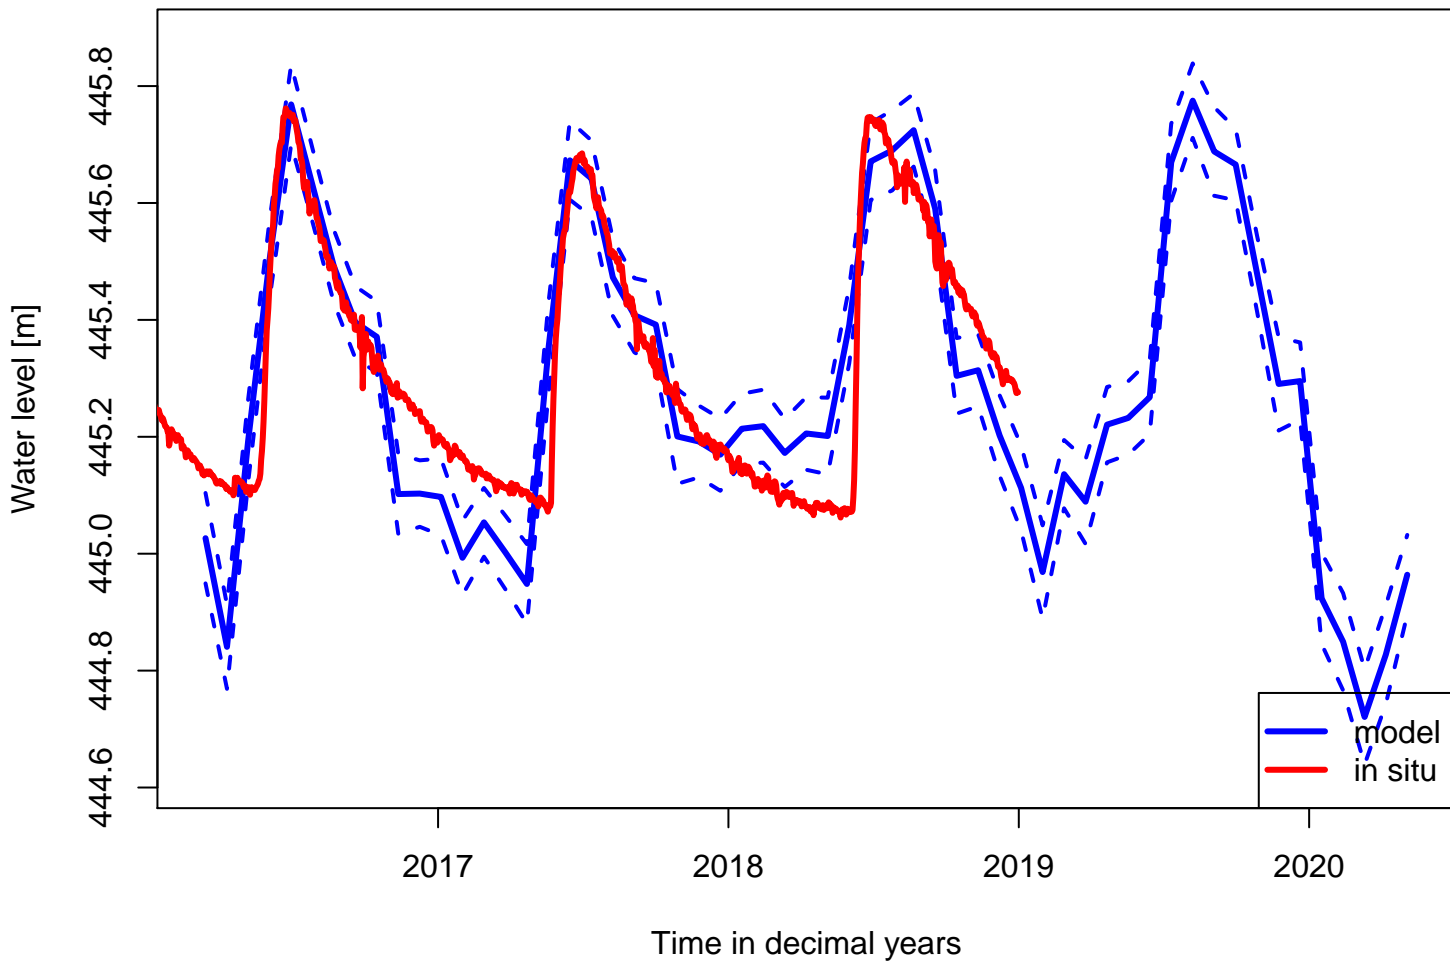

Supplement: s1 [file s1]

**lakename: Winnebago lakeid: 762 lat: 44.07 lon: -88.33**

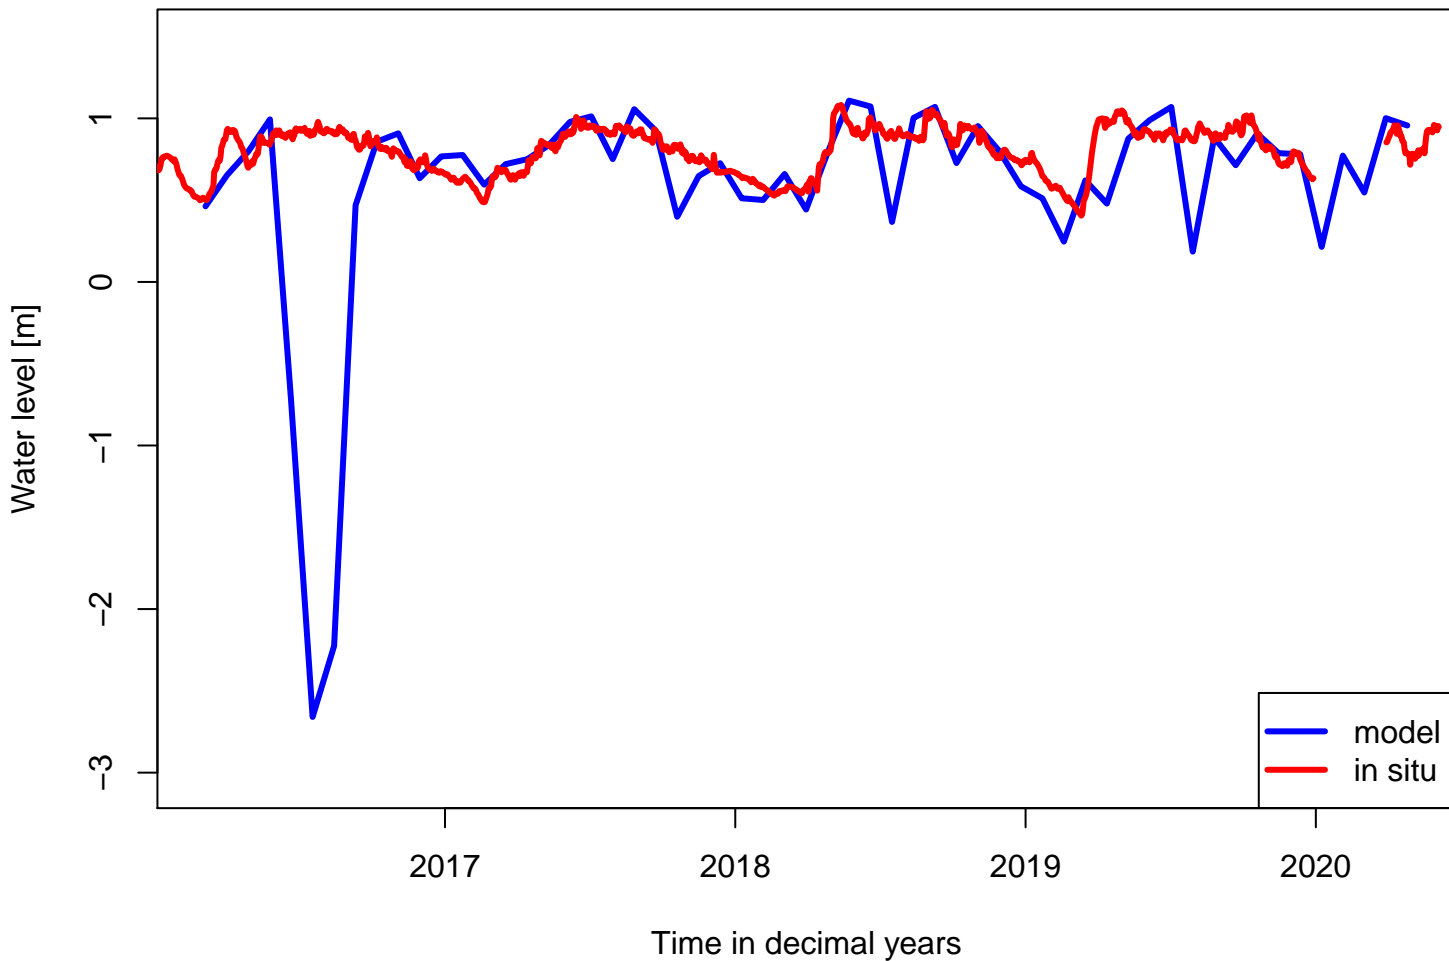

Supplement: s1 [file s1]

**lakename: Rainy lakeid: 710 lat: 48.7 lon: -92.96**

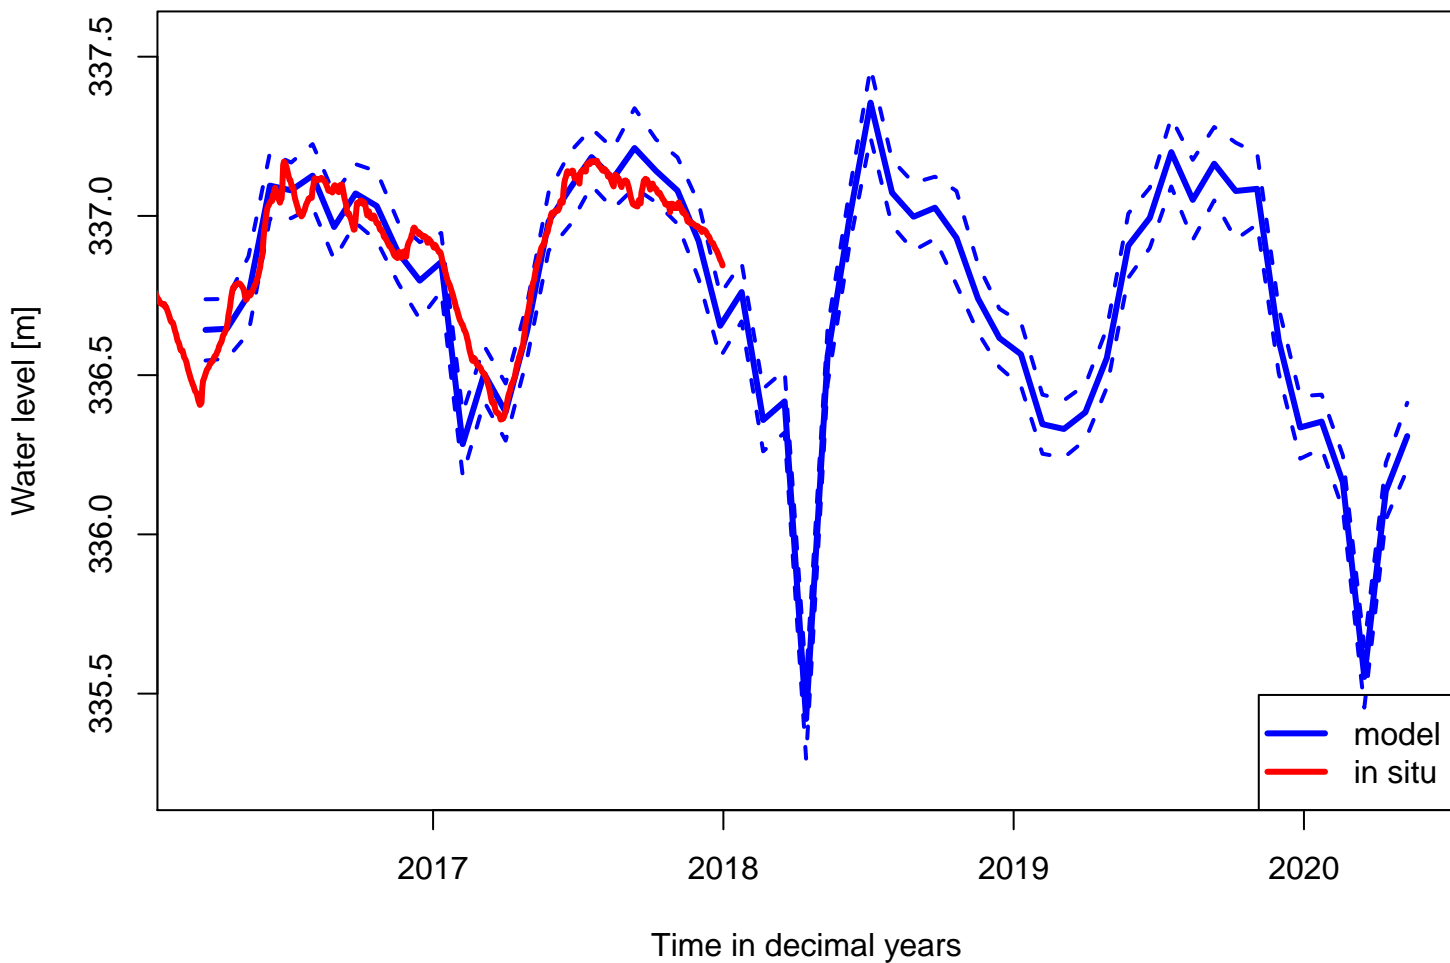

Supplement: s1 [file s1]

**lakename: Notigi Reservoir lakeid: 462 lat: 55.87 lon: -99.33**

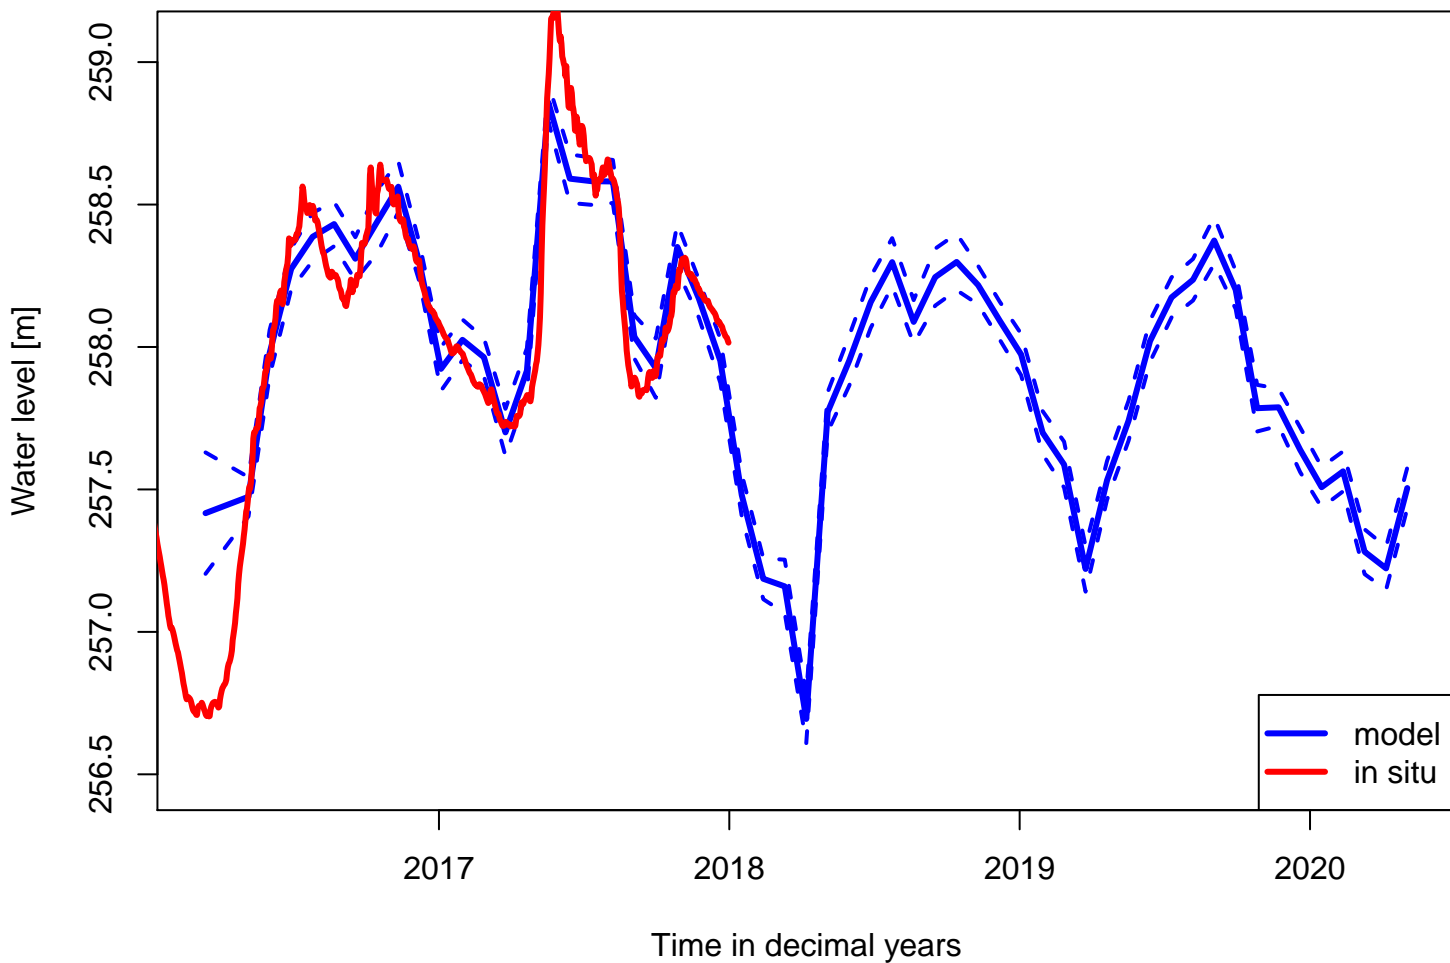

Supplement: s1 [file s1]

**lakename: lakeid: 6545 lat: 54.16 lon: -110.7**

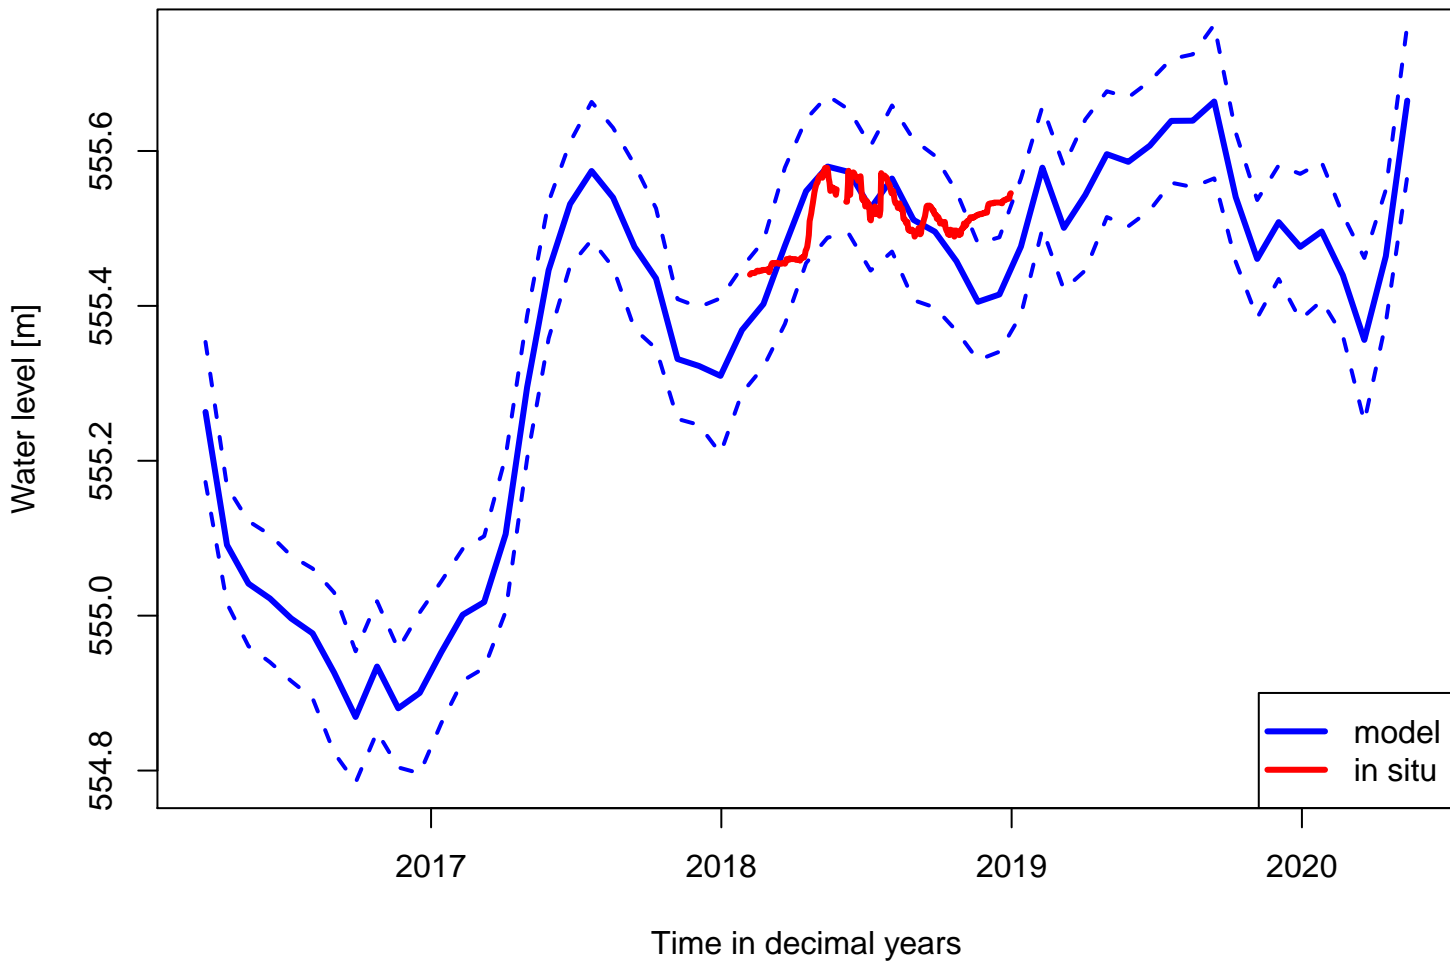

Supplement: s1 [file s1]

**lakename: Cedar lakeid: 51 lat: 53.32 lon: -100.3**

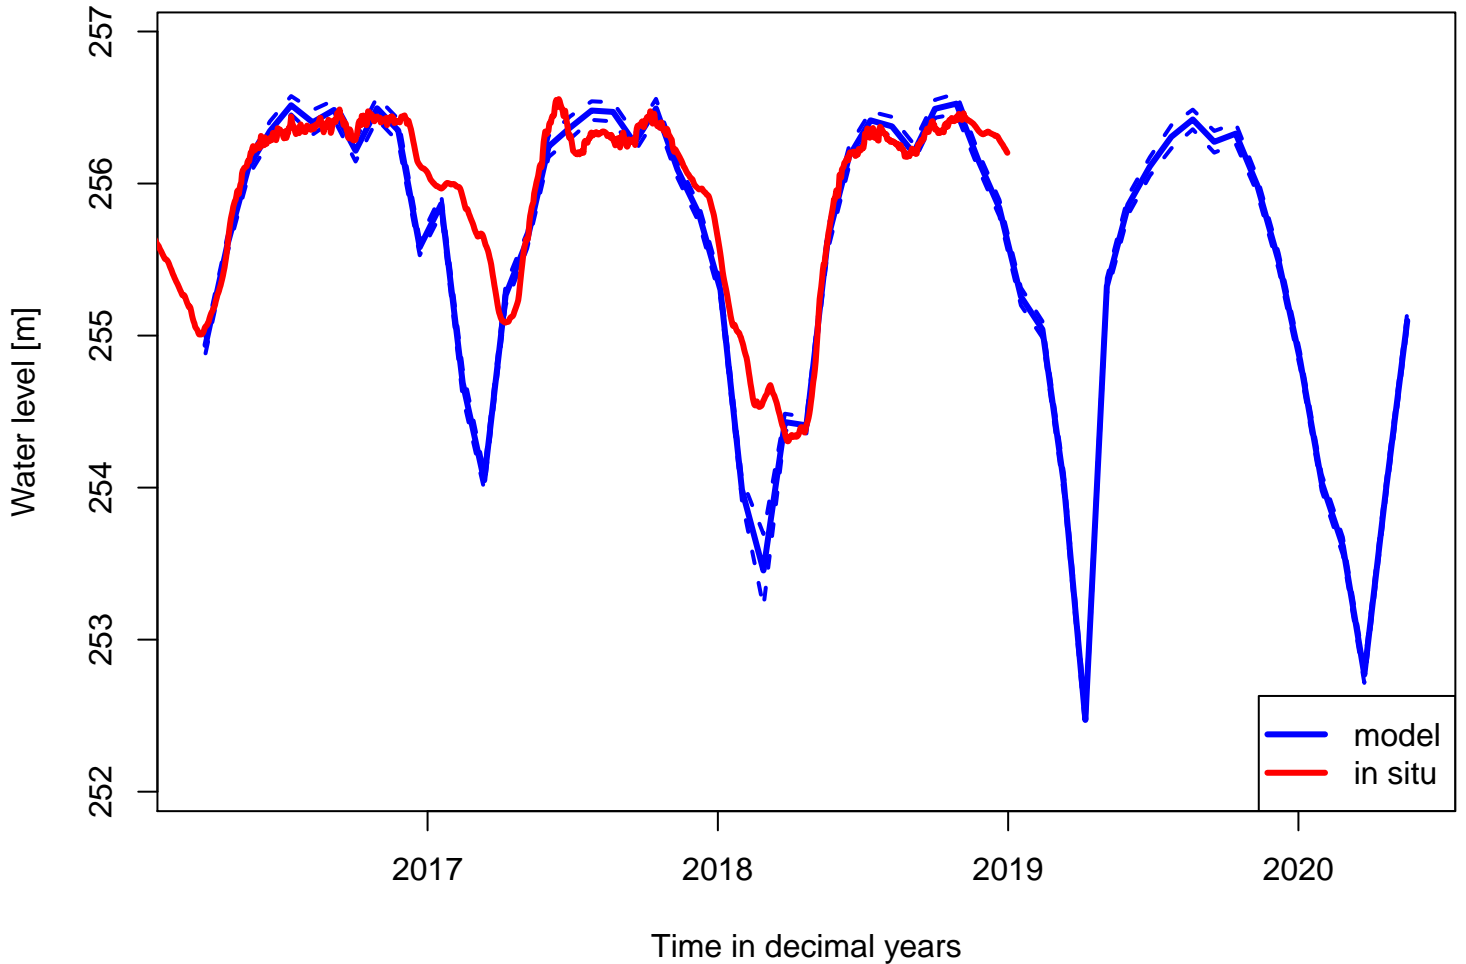

Supplement: s1 [file s1]

**lakename: Saint Clair lakeid: 66 lat: 42.3 lon: -82.71**

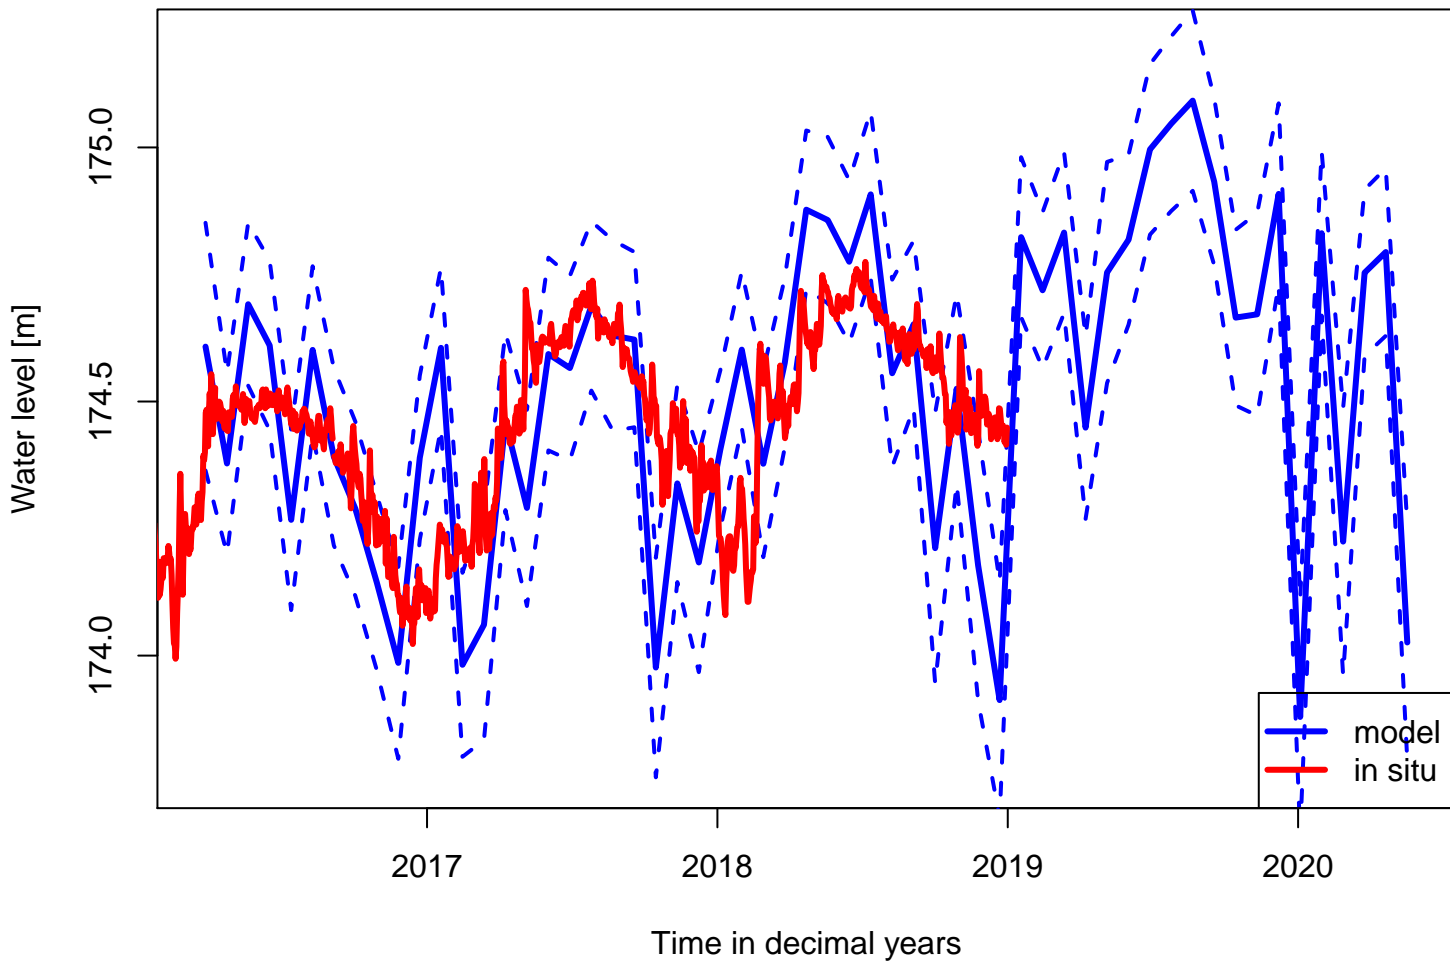

Supplement: s1 [file s1]

**lakename: Woods lakeid: 57 lat: 48.9 lon: -95.32**

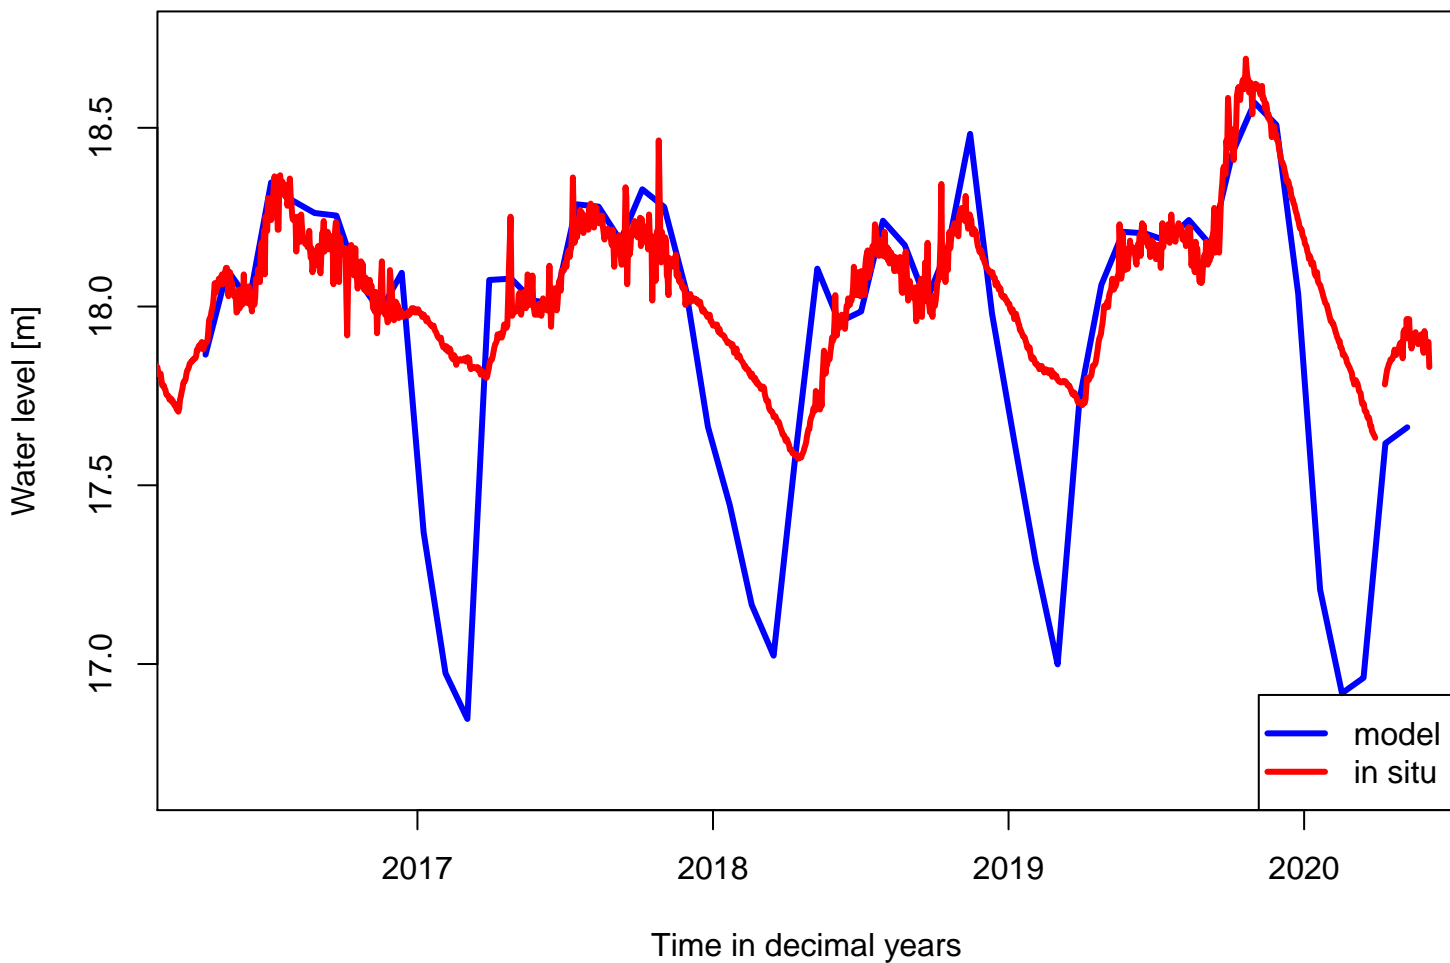

Supplement: s1 [file s1]

**lakename: Nonacho lakeid: 359 lat: 61.73 lon: -109.7**

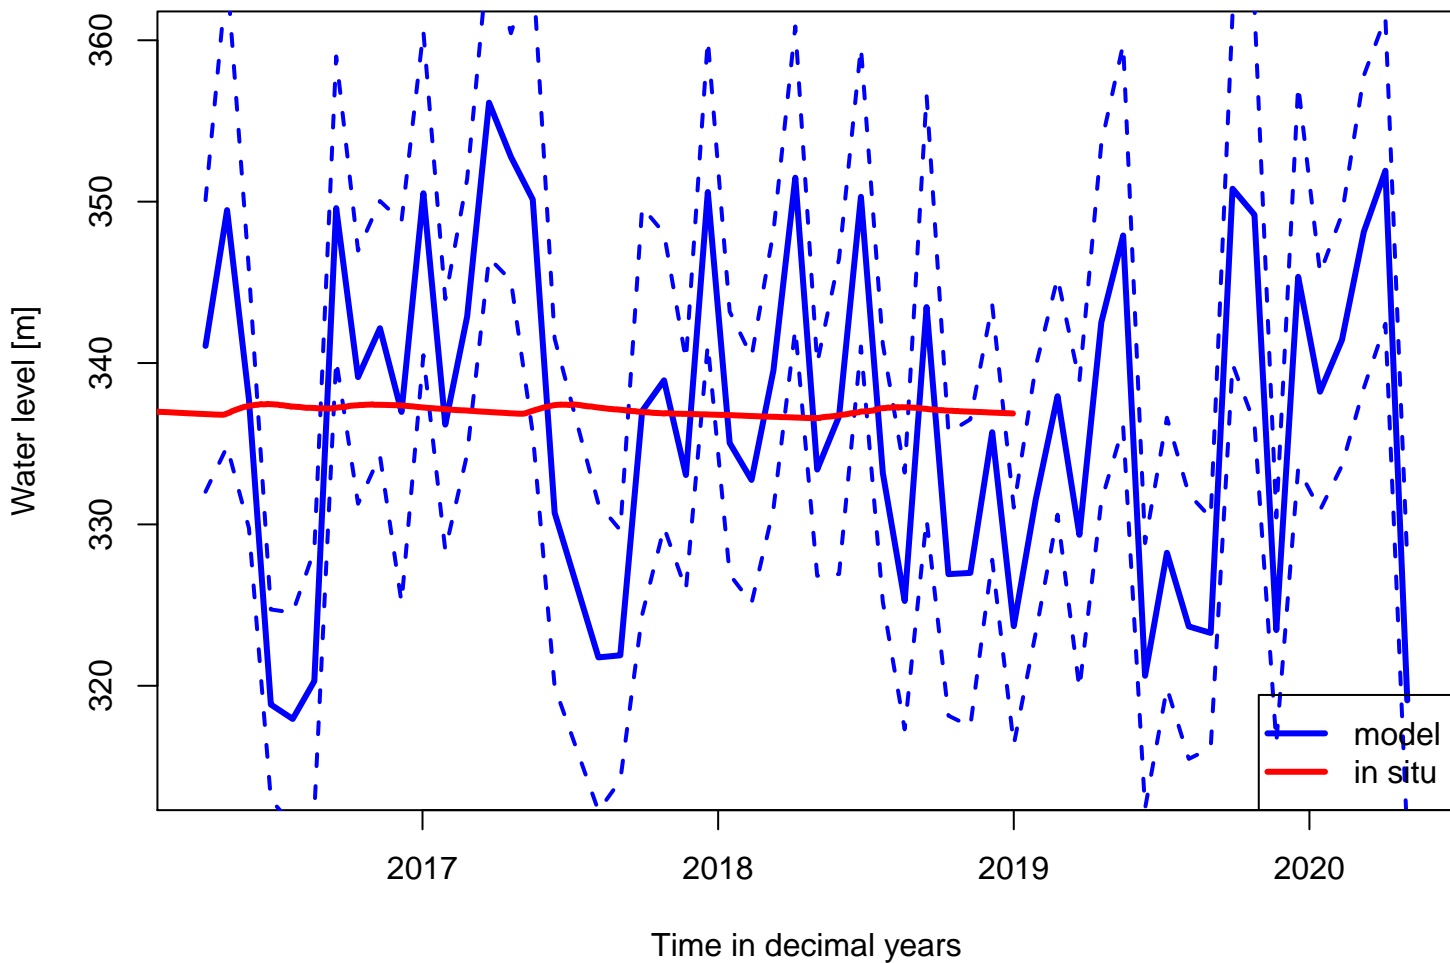

Supplement: s1 [file s1]

**lakename: Egg lakeid: 527 lat: 55.09 lon: -105.4**

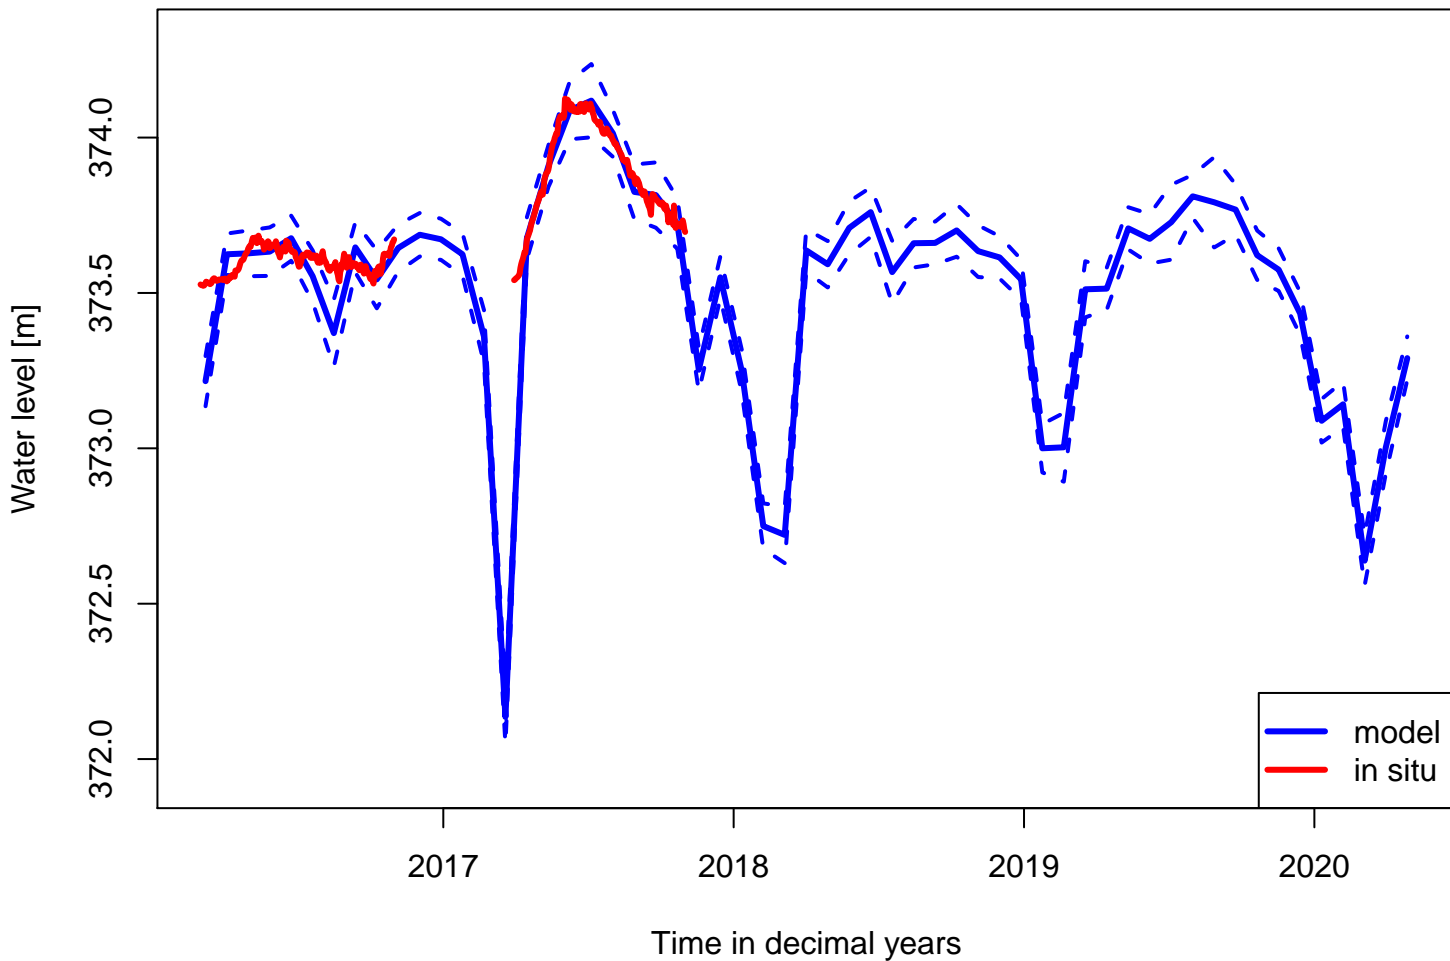

Supplement: s1 [file s1]

**lakename: Woods lakeid: 57 lat: 49.77 lon: -94.5**

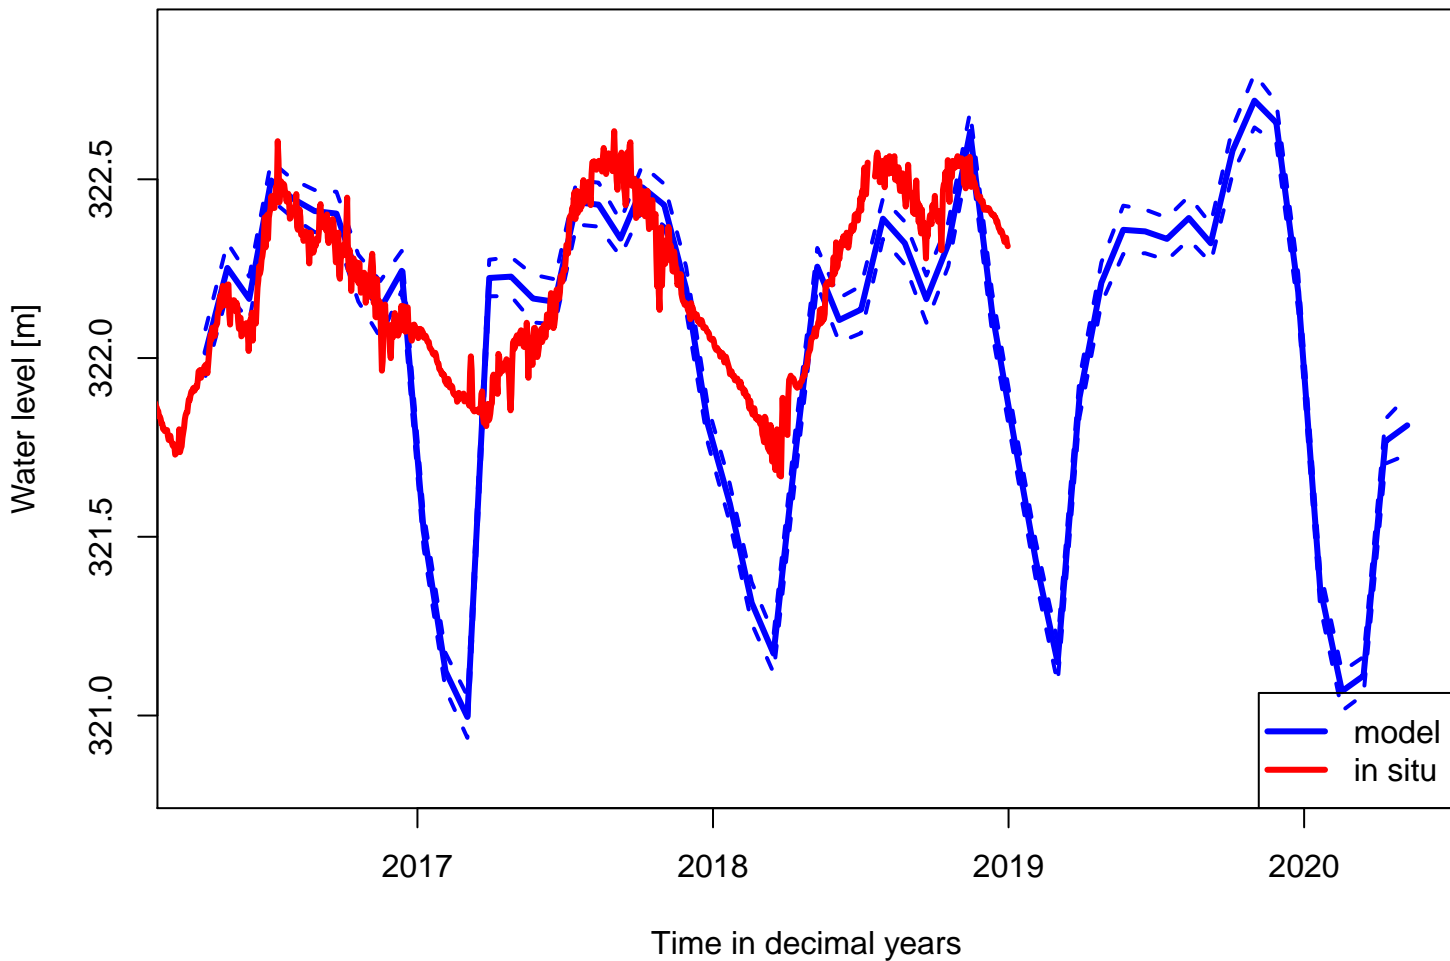

Supplement: s1 [file s1]

**lakename: Adams lakeid: 651 lat: 50.94 lon: -119.7**

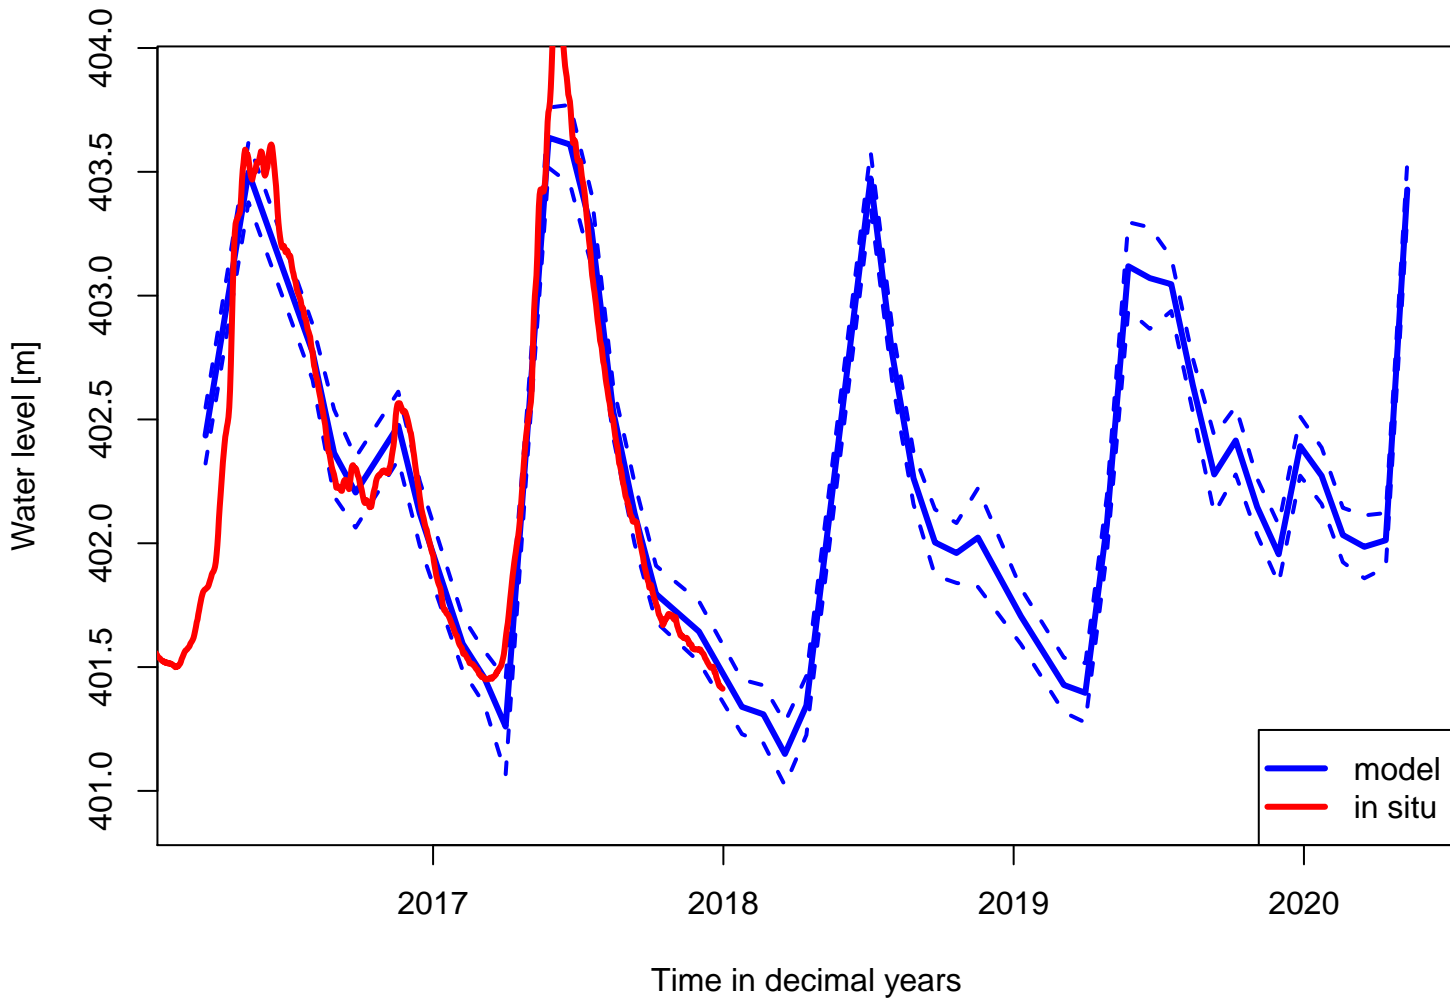

Supplement: s1 [file s1]
